# Supplementary material
Source: publisher site journal article supplement (https://www.dovepress.com/article/346505)
Supplement: Supplementary file 1 [file get_supplementary_file.php]

# Supplementary materials

## Contents

|                                                                                                                                      |     |
|--------------------------------------------------------------------------------------------------------------------------------------|-----|
| Additional file 1. Gene expression profiling-RNA sequencing.....                                                                     | 1   |
| Additional file 2. Gene set enrichment analysis.....                                                                                 | 414 |
| Additional file 3. Hub genes of Hippo signaling pathway.....                                                                         | 416 |
| Additional file 4. The expression of hub genes (Yap1, Lef1, Ctgf, Ccnd1, Axin2, Smad7, and Wnt4.) were down-regulated in goblet..... | 417 |

**Table S1: Gene expression profiling-RNA sequencing**

| #ID      | Symbol    | Control 1 | Control 2 | Control 3 | Asthma 1 | Asthma 2 | Asthma 3  |
|----------|-----------|-----------|-----------|-----------|----------|----------|-----------|
| ENSMUSG  | Zranb2    | 18.40992  | 18.12329  | 18.30748  | 18.61071 | 16.00714 | 16.974992 |
| ENSMUSG  | Lrriq3    | 0.670757  | 0.306873  | 0.230956  | 0.484253 | 0.242095 | 0.282332  |
| ENSMUSG  | Dnase2b   | 0.06814   | 0.046494  | 0.061157  | 0.087105 | 0        | 0.0407    |
| ENSMUSG  | Adgrl2    | 27.01144  | 27.84543  | 25.87351  | 21.3873  | 23.09061 | 18.242878 |
| ENSMUSG  | Rpf1      | 15.95143  | 16.12446  | 17.13603  | 15.54776 | 16.12679 | 15.087144 |
| ENSMUSG  | Uox       | 0.094737  | 0.405442  | 0.072772  | 1.027018 | 0.496807 | 0.336949  |
| ENSMUSG  | Ctbs      | 7.528868  | 7.024169  | 7.036773  | 5.674893 | 5.729126 | 5.896232  |
| ENSMUSG  | Spata1    | 1.038948  | 0.949067  | 1.522922  | 1.01113  | 1.062886 | 1.061829  |
| ENSMUSG  | Ptprh     | 0         | 0.001398  | 0         | 0.00473  | 0.013225 | 0.004602  |
| ENSMUSG  | Mageb4    | 0         | 0         | 0         | 0        | 0        | 0         |
| ENSMUSG  | Fam170a   | 0         | 0         | 0         | 0        | 0        | 0         |
| ENSMUSG  | Sap30bp   | 9.618636  | 9.657901  | 8.955708  | 8.431721 | 7.981021 | 9.12459   |
| ENSMUSG  | Recql5    | 4.35108   | 4.095323  | 3.987301  | 4.286898 | 4.305344 | 4.341053  |
| ENSMUSG  | Itgb4     | 2.303639  | 2.298743  | 1.787338  | 2.361501 | 2.175224 | 2.708456  |
| ENSMUSG  | Ahnak     | 138.2981  | 139.6474  | 107.8975  | 80.98412 | 84.23867 | 80.232286 |
| ENSMUSG  | Nlrp1a    | 0         | 0         | 0         | 0        | 0        | 0         |
| ENSMUSG  | Atp6v0d2  | 22.87283  | 21.70932  | 22.69901  | 60.79556 | 67.01531 | 65.251404 |
| ENSMUSG  | Cdk10     | 12.73511  | 12.57944  | 11.96612  | 11.7763  | 9.859072 | 11.177294 |
| ENSMUSG  | Klf9      | 53.15844  | 56.44413  | 37.85076  | 29.0175  | 34.68461 | 28.391605 |
| ENSMUSG  | Fgg       | 0         | 0.071172  | 0.080053  | 0.038481 | 0.082462 | 0.092675  |
| ENSMUSG  | Sat2      | 1.51144   | 1.363022  | 0.875108  | 1.537992 | 0.789874 | 0.792496  |
| ENSMUSG  | Tgs1      | 6.700407  | 6.727966  | 6.961949  | 6.535901 | 6.224789 | 5.851031  |
| ENSMUSG  | Tmem68    | 6.42075   | 6.650747  | 6.301518  | 6.205394 | 5.523338 | 5.728097  |
| Mus_musc | Mus_musc  | 0.150787  | 0.210132  | 0.482409  | 0.177607 | 0.137644 | 0.300728  |
| ENSMUSG  | Sdr16c5   | 0         | 0         | 0         | 0        | 0        | 0         |
| ENSMUSG  | Rps20     | 42.60596  | 43.90861  | 44.20593  | 51.69774 | 46.24308 | 46.434914 |
| ENSMUSG  | Olfir779  | 0         | 0         | 0         | 0        | 0        | 0         |
| ENSMUSG  | Ackr2     | 41.97864  | 31.96013  | 33.51294  | 17.40664 | 22.38026 | 16.843716 |
| ENSMUSG  | Agtr2     | 0.068958  | 0.028154  | 0         | 0        | 0        | 0.016831  |
| ENSMUSG  | Btdb35f22 | 0         | 0         | 0         | 0        | 0        | 0         |
| ENSMUSG  | Cst7      | 0.98707   | 0.536952  | 2.708118  | 3.379902 | 2.491882 | 5.017487  |
| ENSMUSG  | Olfir1105 | 0         | 0         | 0         | 0        | 0        | 0         |
| ENSMUSG  | Snrpb     | 92.17655  | 91.57972  | 99.1869   | 77.22511 | 76.24096 | 81.121804 |
| ENSMUSG  | Olfir1101 | 0         | 0         | 0         | 0        | 0        | 0         |
| ENSMUSG  | Olfir1104 | 0         | 0         | 0         | 0.022755 | 0        | 0         |
| ENSMUSG  | Olfir1109 | 0         | 0         | 0         | 0        | 0        | 0         |
| ENSMUSG  | Pdyn      | 0         | 0         | 0         | 0.065055 | 0        | 0.041376  |
| ENSMUSG  | Tgm6      | 0         | 0         | 0         | 0        | 0        | 0         |
| ENSMUSG  | Olfir1098 | 0         | 0         | 0         | 0        | 0        | 0         |
| ENSMUSG  | Olfir1099 | 0         | 0         | 0         | 0        | 0        | 0         |
| ENSMUSG  | 4933415F2 | 0.058067  | 0.025993  | 0         | 0        | 0        | 0.031025  |
| ENSMUSG  | Stk4      | 36.11199  | 34.46984  | 38.30489  | 28.77373 | 31.20507 | 28.327294 |
| ENSMUSG  | Cnr1      | 0.226499  | 0.196188  | 0.158929  | 0.381775 | 0.102987 | 0.388577  |
| ENSMUSG  | Olfir221  | 0         | 0         | 0         | 0        | 0        | 0         |
| ENSMUSG  | Nrn1l     | 0.267623  | 0.804003  | 0.459006  | 0        | 0        | 0         |
| ENSMUSG  | Chrd      | 0.781957  | 1.131606  | 0.841189  | 0.999759 | 0.896044 | 1.024289  |
| ENSMUSG  | Defb50    | 0         | 0         | 0         | 0        | 0        | 0         |
| ENSMUSG  | Tmed9     | 65.8936   | 69.50973  | 73.59026  | 75.99736 | 79.76753 | 77.190229 |
| ENSMUSG  | Gm21719   | 0         | 0         | 0         | 0        | 0        | 0         |
| ENSMUSG  | Erap1     | 17.06001  | 16.13447  | 19.55092  | 18.0572  | 16.43894 | 17.451562 |
| ENSMUSG  | Pcsk1     | 0.177212  | 0.34392   | 0.099082  | 0.139178 | 0.174211 | 0.28408   |
| ENSMUSG  | Cast      | 30.63989  | 30.35226  | 28.54915  | 29.23193 | 29.86122 | 29.400277 |
| ENSMUSG  | Rhobtb3   | 1.199439  | 1.48182   | 0.956525  | 0.849394 | 1.252436 | 1.064317  |
| ENSMUSG  | Gm8300    | 0         | 0         | 0         | 0        | 0        | 0         |
| ENSMUSG  | Vwa3a     | 2.453676  | 2.899536  | 1.759609  | 2.923533 | 2.934404 | 3.075786  |
| ENSMUSG  | Rrp8      | 5.717262  | 5.004619  | 5.674331  | 6.282381 | 5.944218 | 5.722482  |
| ENSMUSG  | Arfip2    | 13.14854  | 13.23903  | 11.0758   | 13.55235 | 13.38341 | 14.251326 |
| ENSMUSG  | Polr3e    | 5.618179  | 4.28903   | 5.395368  | 5.108722 | 4.442176 | 5.210367  |
| ENSMUSG  | Psemb7    | 47.82234  | 45.37727  | 52.8994   | 47.56028 | 47.76037 | 48.340786 |
| ENSMUSG  | Dnhd1     | 0.378117  | 0.38551   | 0.526354  | 0.386782 | 0.46586  | 0.30114   |
| ENSMUSG  | Uqcrc2    | 47.76281  | 48.52047  | 45.31183  | 47.07848 | 46.33376 | 46.222569 |
| ENSMUSG  | Golga1    | 6.865866  | 5.91306   | 6.251122  | 5.712862 | 4.763898 | 5.097114  |
| ENSMUSG  | Arpc5l    | 23.4357   | 26.38113  | 28.01321  | 26.74347 | 27.6331  | 28.110215 |

|                   |          |          |          |          |          |           |
|-------------------|----------|----------|----------|----------|----------|-----------|
| ENSMUSG Gm13084   | 0        | 0        | 0        | 0        | 0        | 0         |
| ENSMUSG Ddn       | 0        | 0.012361 | 0        | 0.032805 | 0.014955 | 0         |
| Mus_musc Mus_musc | 0        | 0        | 0        | 0.337896 | 0        | 0         |
| Mus_musc Mus_musc | 0        | 0        | 0        | 0.269167 | 0.368393 | 0.123612  |
| Mus_musc Mus_musc | 0.188031 | 0        | 0.106022 | 0        | 0        | 0         |
| Mus_musc Mus_musc | 0.289634 | 0.167175 | 0.299514 | 1.210368 | 1.269549 | 1.011667  |
| Mus_musc Mus_musc | 0        | 0.210224 | 0        | 0.269215 | 0        | 0.170758  |
| ENSMUSG Ubap1l    | 0.444327 | 0.043497 | 0        | 0.031146 | 0.297896 | 0         |
| ENSMUSG Syce2     | 1.805839 | 1.43935  | 1.921258 | 1.148252 | 2.186675 | 2.558471  |
| ENSMUSG Olfr213   | 0        | 0        | 0        | 0        | 0        | 0         |
| ENSMUSG Gm15013   | 0.067372 | 0        | 0.029949 | 0        | 0        | 0         |
| ENSMUSG Gm21721   | 0        | 0        | 0        | 0        | 0        | 0         |
| ENSMUSG Bid       | 2.266882 | 1.898535 | 3.33298  | 4.75374  | 4.927183 | 5.852378  |
| ENSMUSG Vmn2r25   | 0        | 0        | 0        | 0        | 0        | 0         |
| ENSMUSG Olfr1354  | 0        | 0        | 0        | 0        | 0        | 0         |
| ENSMUSG Kctd12    | 24.49059 | 24.063   | 23.54569 | 21.6363  | 22.10043 | 20.710949 |
| ENSMUSG Chst9     | 0.043751 | 0        | 0        | 0        | 0        | 0         |
| Mus_musc Mus_musc | 0        | 0        | 0.17337  | 0        | 0        | 0         |
| Mus_musc Mus_musc | 0        | 0        | 0        | 0        | 0        | 0.184186  |
| Mus_musc Mus_musc | 0.126105 | 0.210366 | 0.026302 | 0        | 0        | 0.141173  |
| ENSMUSG Hpgds     | 0.487064 | 0.373787 | 0.423069 | 1.060768 | 1.103827 | 1.054991  |
| ENSMUSG Mrps33    | 14.83211 | 15.53211 | 15.26719 | 16.88031 | 12.4694  | 13.693425 |
| Mus_musc Mus_musc | 0.373862 | 0.381003 | 0.392836 | 0        | 0.254444 | 0         |
| ENSMUSG Clec5a    | 0.531074 | 0.544707 | 1.242341 | 1.783335 | 2.470802 | 2.313837  |
| ENSMUSG C130060K; | 0        | 0        | 0        | 0        | 0        | 0         |
| ENSMUSG Agk       | 6.737996 | 5.428625 | 6.769525 | 5.108799 | 5.423622 | 4.448694  |
| ENSMUSG Ssbp1     | 12.42417 | 12.38295 | 12.73777 | 15.15675 | 12.94656 | 13.914029 |
| ENSMUSG Mad2l1    | 2.477389 | 2.62281  | 2.933883 | 4.427883 | 5.139179 | 4.665606  |
| ENSMUSG Prdm5     | 2.217939 | 2.467511 | 2.294709 | 1.376332 | 1.517573 | 1.195973  |
| ENSMUSG Mkrn3     | 0.288285 | 0.471288 | 0.531018 | 0.62583  | 0.322589 | 0.222007  |
| Mus_musc Mus_musc | 0.67426  | 0.919682 | 0.491239 | 0.697669 | 0.355095 | 0.372     |
| ENSMUSG Gm17467   | 0        | 0        | 0        | 0        | 0        | 0         |
| ENSMUSG Gm13285   | 0        | 0.003166 | 0.037381 | 0.004344 | 0.003831 | 0.042519  |
| ENSMUSG Prss16    | 0.158016 | 0.306256 | 0.128172 | 0.699295 | 0.634693 | 0.78666   |
| Mus_musc Mus_musc | 0        | 0.126343 | 0.27578  | 0.194945 | 0.159265 | 0.049273  |
| Mus_musc Mus_musc | 0        | 0.168852 | 0.345302 | 0.208819 | 0.329204 | 0.165093  |
| Mus_musc Mus_musc | 0.442066 | 0.323363 | 0.456899 | 0.205904 | 0.210953 | 0.241031  |
| ENSMUSG Esp15     | 0        | 0        | 0        | 0        | 0        | 0         |
| Mus_musc Mus_musc | 1.042614 | 1.405937 | 1.044415 | 0.770499 | 0.53759  | 0.824019  |
| Mus_musc Mus_musc | 0.291662 | 0.280562 | 0.291319 | 0.356436 | 0.151688 | 0.38407   |
| Mus_musc Mus_musc | 0        | 0        | 0.137087 | 0.174016 | 0        | 0         |
| Mus_musc Mus_musc | 2.724306 | 2.84018  | 2.256312 | 2.49651  | 2.937154 | 2.524702  |
| Mus_musc Mus_musc | 0        | 0        | 0        | 0        | 0        | 0         |
| Mus_musc Mus_musc | 0        | 0.198682 | 0        | 0.092236 | 0        | 0         |
| Mus_musc Mus_musc | 0.222173 | 0        | 0        | 0        | 0        | 0         |
| Mus_musc Mus_musc | 0.428167 | 0        | 0.659564 | 0.981109 | 0.48003  | 0         |
| ENSMUSG Tor1b     | 12.47861 | 14.56371 | 13.28819 | 12.70111 | 14.54642 | 13.815405 |
| ENSMUSG Ifi209    | 1.246312 | 1.055544 | 2.498508 | 2.161274 | 1.57652  | 1.76688   |
| ENSMUSG Uevld     | 3.31211  | 3.365202 | 3.281136 | 3.226655 | 3.600954 | 3.076395  |
| ENSMUSG Olfr1031  | 0        | 0        | 0        | 0        | 0        | 0         |
| ENSMUSG Kdelc1    | 8.186477 | 7.534988 | 7.90788  | 7.194746 | 7.651696 | 7.65224   |
| ENSMUSG Ssc5d     | 1.016961 | 1.198452 | 1.367147 | 1.425588 | 1.389115 | 1.530254  |
| ENSMUSG Plekhj1   | 16.17091 | 15.10603 | 17.33615 | 17.87917 | 16.48664 | 19.55266  |
| ENSMUSG Wnt3      | 0.033498 | 0.066775 | 0.049099 | 0.059853 | 0.033138 | 0.064381  |
| ENSMUSG Rps2      | 14.01525 | 13.72998 | 13.59083 | 11.70305 | 17.53782 | 15.41403  |
| ENSMUSG Tmem30b   | 9.903492 | 8.766222 | 6.941463 | 7.281276 | 8.606073 | 7.976046  |
| ENSMUSG Zxdc      | 5.512173 | 5.270949 | 5.449075 | 4.331515 | 5.113308 | 5.30507   |
| ENSMUSG Cops8     | 20.9727  | 23.55632 | 23.52588 | 18.98235 | 18.72047 | 19.079809 |
| ENSMUSG Gm20379   | 0.024831 | 0        | 0        | 0        | 0        | 0         |
| ENSMUSG Gbp8      | 2.926575 | 2.869572 | 21.04902 | 9.918539 | 3.076517 | 4.5596    |
| ENSMUSG Gm7682    | 0        | 0        | 0        | 0        | 0        | 0         |
| Mus_musc Mus_musc | 0.255084 | 0.078028 | 0.143436 | 0.274814 | 0.278982 | 0.476451  |
| Mus_musc Mus_musc | 0        | 0        | 0        | 0        | 0        | 0.210963  |
| Mus_musc Mus_musc | 0        | 0        | 0        | 0.174016 | 0        | 0         |

|                   |          |          |          |          |          |           |
|-------------------|----------|----------|----------|----------|----------|-----------|
| Mus_musc Mus_musc | 0.352133 | 0        | 0        | 0.225883 | 0.201107 | 0.364157  |
| ENSMUSG Kdm4d     | 0.03656  | 0.057372 | 0        | 0.032156 | 0.062346 | 0.079552  |
| ENSMUSG Nanp      | 5.810698 | 4.183895 | 3.946179 | 1.922604 | 1.92806  | 1.674919  |
| ENSMUSG Wfdc2     | 338.125  | 393.184  | 294.2769 | 411.7154 | 339.4268 | 375.07717 |
| ENSMUSG Pigt      | 33.61784 | 30.03268 | 31.08239 | 33.74739 | 34.95501 | 35.288401 |
| ENSMUSG Trp53tg5  | 0        | 0.040007 | 0        | 0.074512 | 0        | 0         |
| ENSMUSG Etv4      | 0.099101 | 0.082057 | 0.058757 | 0.205768 | 0.16245  | 0.126046  |
| ENSMUSG Lpo       | 0        | 0        | 0        | 0        | 0        | 0.022661  |
| ENSMUSG Mpo       | 0.120212 | 0.016834 | 0.055366 | 0.176061 | 0.085566 | 0.143223  |
| Mus_musc Mus_musc | 0        | 0        | 0        | 0        | 0        | 0.312352  |
| Mus_musc Mus_musc | 5.495057 | 6.720715 | 9.442489 | 6.293005 | 8.043187 | 6.537943  |
| Mus_musc Mus_musc | 5.292123 | 5.594155 | 4.633885 | 3.801185 | 3.039928 | 3.007601  |
| Mus_musc Mus_musc | 0.129352 | 0.462049 | 0.210166 | 0.13517  | 0.376999 | 0.381589  |
| Mus_musc Mus_musc | 0.480163 | 0        | 0.170398 | 0.75116  | 0.458171 | 0.278829  |
| ENSMUSG Ppt2      | 20.34509 | 20.28787 | 23.33774 | 19.49747 | 17.9104  | 17.228093 |
| Mus_musc Mus_musc | 0.838273 | 1.20682  | 1.409398 | 1.803884 | 1.536435 | 1.94487   |
| Mus_musc Mus_musc | 0.226781 | 0.179775 | 0.237094 | 0.471    | 0        | 0.210506  |
| ENSMUSG Prkcg     | 1.197233 | 1.262809 | 1.318824 | 0.794188 | 0.529999 | 0.738394  |
| ENSMUSG Nlrp12    | 0.392565 | 0.267079 | 0.407856 | 0.300735 | 0.348162 | 0.367017  |
| ENSMUSG Cacng6    | 0        | 0        | 0        | 0        | 0        | 0         |
| ENSMUSG Eif5a     | 158.1836 | 151.8627 | 180.8541 | 176.0749 | 180.0107 | 188.13282 |
| Mus_musc Mus_musc | 0.473932 | 0.708275 | 1.144462 | 1.197715 | 1.033199 | 1.206139  |
| Mus_musc Mus_musc | 41.10824 | 64.66946 | 46.58165 | 40.18304 | 39.5275  | 39.650856 |
| Mus_musc Mus_musc | 0        | 0        | 0        | 0        | 0        | 0.184186  |
| Mus_musc Mus_musc | 0        | 0        | 0        | 0        | 0.082426 | 0.059079  |
| ENSMUSG Dppa3     | 0        | 0        | 0        | 0        | 0.045721 | 0         |
| ENSMUSG Abca12    | 0        | 0.045058 | 0        | 0.015998 | 0.020473 | 0         |
| ENSMUSG Nop56     | 19.91737 | 18.16872 | 20.15556 | 19.54852 | 17.27346 | 18.35026  |
| ENSMUSG Foxc1     | 0.42587  | 0.340463 | 0.285521 | 0.2216   | 0.16104  | 0.373226  |
| ENSMUSG Olfr1106  | 0        | 0        | 0        | 0        | 0        | 0         |
| ENSMUSG Idh3b     | 42.33526 | 42.88005 | 44.05829 | 49.54544 | 46.19145 | 51.210337 |
| ENSMUSG Tgm3      | 0        | 0.20133  | 0.022225 | 0.208819 | 0.011919 | 0.119019  |
| ENSMUSG Gm29554   | 0        | 0        | 0        | 0        | 0        | 0         |
| ENSMUSG Olfr259   | 0        | 0        | 0        | 0        | 0        | 0         |
| ENSMUSG Olfr1107  | 0        | 0        | 0        | 0        | 0        | 0         |
| ENSMUSG Nme8      | 0        | 0        | 0        | 0        | 0        | 0         |
| ENSMUSG Zfp598    | 19.01884 | 17.11397 | 19.69333 | 15.1844  | 15.6246  | 14.903906 |
| ENSMUSG Smc1a     | 27.39471 | 25.86155 | 24.88322 | 23.95789 | 24.69334 | 22.582271 |
| ENSMUSG N4bp2l1   | 8.963383 | 7.707745 | 10.02193 | 10.56492 | 10.89739 | 9.091687  |
| ENSMUSG Ripk2     | 7.890537 | 7.059577 | 6.779725 | 5.337658 | 6.799777 | 5.858336  |
| ENSMUSG Cyyr1     | 72.71634 | 74.94089 | 72.55267 | 49.19161 | 51.34621 | 45.099003 |
| ENSMUSG Gm9045    | 0.329273 | 0.501125 | 0.433997 | 0.301927 | 0.392326 | 0.356353  |
| ENSMUSG 1700020A: | 0        | 0        | 0.213537 | 0.106072 | 0        | 0.134225  |
| ENSMUSG Srsf6     | 39.86654 | 35.77041 | 41.58807 | 34.64361 | 33.64893 | 34.706646 |
| ENSMUSG Cpxm1     | 4.119406 | 4.193742 | 4.472774 | 17.68993 | 18.4038  | 18.595104 |
| ENSMUSG Rpl30     | 16.96792 | 19.40176 | 17.68847 | 17.14887 | 11.41413 | 19.557455 |
| ENSMUSG Vmn1r5    | 0        | 0        | 0        | 0        | 0        | 0         |
| ENSMUSG Vmn2r46   | 0        | 0        | 0        | 0.004834 | 0        | 0         |
| ENSMUSG Fbxo6     | 22.22698 | 20.79297 | 20.80834 | 20.03001 | 18.66432 | 22.450431 |
| ENSMUSG Map6      | 21.57626 | 17.90708 | 20.78864 | 12.77088 | 13.13412 | 13.573788 |
| ENSMUSG Nell1     | 0.014634 | 0.011683 | 0.02211  | 0.029402 | 0        | 0.014446  |
| ENSMUSG Enthd1    | 0        | 0        | 0        | 0        | 0.037155 | 0.023476  |
| ENSMUSG Usp29     | 0        | 0        | 0.006722 | 0        | 0        | 0         |
| ENSMUSG Gm21887   | 9.651845 | 5.637519 | 11.38006 | 7.992983 | 9.610111 | 12.5727   |
| ENSMUSG Olfr424   | 0        | 0        | 0        | 0        | 0        | 0         |
| Mus_musc Mus_musc | 0.593673 | 0.736322 | 0.76105  | 0.77461  | 0.878225 | 0.402137  |
| Mus_musc Mus_musc | 0        | 0.044925 | 0        | 0.25446  | 0.646825 | 0.656473  |
| Mus_musc Mus_musc | 0        | 0        | 0        | 0        | 0        | 0         |
| ENSMUSG Gm5890    | 0        | 0        | 0        | 0        | 0        | 0         |
| Mus_musc Mus_musc | 0.246962 | 0.202139 | 0        | 0.168416 | 0        | 0.334711  |
| Mus_musc Mus_musc | 0        | 0        | 0        | 0        | 0        | 0.297532  |
| Mus_musc Mus_musc | 1.055119 | 0.451757 | 1.059819 | 0.810214 | 0.947086 | 1.439483  |
| Mus_musc Mus_musc | 0.210798 | 0.056051 | 0.360232 | 0.054266 | 0.147448 | 0         |
| Mus_musc Mus_musc | 0        | 0        | 0        | 0        | 0.255838 | 0         |

|                   |          |          |          |          |          |           |
|-------------------|----------|----------|----------|----------|----------|-----------|
| Mus_musc Mus_musc | 0.167469 | 0        | 0        | 0        | 0        | 0.137836  |
| Mus_musc Mus_musc | 34.67904 | 33.70739 | 38.64317 | 24.51989 | 25.41395 | 22.356775 |
| Mus_musc Mus_musc | 0.26749  | 0        | 0.307429 | 0.09275  | 0        | 0         |
| Mus_musc Mus_musc | 0.484032 | 0.464054 | 0.395829 | 0.267164 | 0.20577  | 0.415876  |
| Mus_musc Mus_musc | 0.323161 | 0        | 0        | 0        | 0        | 0.169541  |
| Mus_musc Mus_musc | 0        | 0.311467 | 0        | 0        | 0        | 0         |
| ENSMUSG Pate3     | 0        | 0        | 0        | 0        | 0        | 0         |
| ENSMUSG Oard1     | 13.01633 | 12.30748 | 12.54079 | 11.23461 | 11.1643  | 11.554571 |
| ENSMUSG Cept1     | 23.8871  | 26.69503 | 27.2113  | 28.20609 | 27.40922 | 26.729263 |
| ENSMUSG Fbxw25    | 0        | 0        | 0        | 0        | 0        | 0.075282  |
| ENSMUSG Gm3776    | 0.288358 | 0.264039 | 0.12754  | 0.173883 | 0.108299 | 0         |
| ENSMUSG Col8a2    | 2.639559 | 2.527746 | 2.455102 | 1.848219 | 2.147091 | 2.34812   |
| ENSMUSG Gm49385   | 0        | 0        | 0        | 0        | 0        | 0         |
| ENSMUSG Olfr287   | 0        | 0        | 0        | 0        | 0        | 0         |
| ENSMUSG Olfr135   | 0        | 0        | 0        | 0        | 0        | 0         |
| ENSMUSG 1700084M  | 0        | 0        | 0        | 0        | 0        | 0         |
| ENSMUSG Ubxn11    | 3.598979 | 3.841914 | 3.991339 | 5.99018  | 4.223133 | 5.376808  |
| ENSMUSG Ugt1a7c   | 2.848285 | 3.172035 | 3.385787 | 3.001342 | 3.539028 | 3.793328  |
| ENSMUSG Crybg2    | 1.360304 | 1.393945 | 0.819266 | 0.986555 | 0.923069 | 1.073346  |
| ENSMUSG Apex2     | 2.40407  | 2.501443 | 3.006526 | 2.043717 | 1.957989 | 2.41721   |
| ENSMUSG Maged2    | 22.26219 | 20.20587 | 21.92644 | 16.83386 | 16.41879 | 15.821685 |
| ENSMUSG Gnl3l     | 9.733143 | 9.382367 | 8.385814 | 7.809097 | 8.2578   | 8.477038  |
| ENSMUSG Fgd1      | 1.87059  | 1.90655  | 1.502075 | 1.509776 | 1.351692 | 1.448434  |
| ENSMUSG Tsr2      | 6.177785 | 6.052434 | 6.520757 | 5.576643 | 4.509428 | 4.583217  |
| ENSMUSG Fam120c   | 2.340704 | 2.811448 | 2.020183 | 2.399085 | 2.527267 | 2.335352  |
| ENSMUSG Huwe1     | 28.54745 | 28.66621 | 22.44068 | 27.28803 | 25.966   | 27.382652 |
| ENSMUSG Hsd17b10  | 29.58637 | 32.27165 | 29.42236 | 30.43488 | 31.63591 | 33.343687 |
| ENSMUSG Gm8247    | 0        | 0        | 0        | 0        | 0        | 0         |
| ENSMUSG Gm13693   | 0        | 0        | 0        | 0        | 0        | 0         |
| ENSMUSG Hist1h2bl | 0.413571 | 0.644495 | 0.326699 | 0.221517 | 0.475142 | 0.068163  |
| ENSMUSG Iqcf6     | 0        | 0        | 0        | 0        | 0        | 0         |
| Mus_musc Mus_musc | 0        | 0        | 0        | 0        | 0.108849 | 0.184186  |
| Mus_musc Mus_musc | 0.891315 | 0.732244 | 0.943089 | 1.105027 | 1.300838 | 1.008735  |
| ENSMUSG Atp8b4    | 1.733153 | 1.657388 | 2.710627 | 2.146963 | 2.154916 | 2.078438  |
| ENSMUSG Vmn1r54   | 0        | 0        | 0        | 0        | 0        | 0         |
| ENSMUSG Dusp18    | 6.282328 | 5.910691 | 4.468274 | 6.248803 | 6.170641 | 6.298478  |
| ENSMUSG Olfr1495  | 0        | 0        | 0        | 0        | 0        | 0         |
| ENSMUSG Tchp      | 4.321461 | 4.345957 | 4.740422 | 4.107916 | 4.370201 | 3.84957   |
| ENSMUSG Itgb7     | 13.72619 | 10.83566 | 16.12493 | 21.29193 | 13.90824 | 17.910617 |
| ENSMUSG Scgb2b15  | 0        | 0        | 0        | 0        | 0        | 0         |
| ENSMUSG Pi15      | 1.206302 | 1.386833 | 1.326965 | 1.957374 | 2.062151 | 1.954534  |
| ENSMUSG Nnat      | 6.367153 | 7.086279 | 5.784949 | 7.717314 | 7.576314 | 6.386633  |
| ENSMUSG Blcap     | 18.71979 | 21.3427  | 20.71329 | 19.72663 | 19.79425 | 20.113063 |
| ENSMUSG Aldh1a1   | 618.3465 | 739.7333 | 570.4601 | 425.4515 | 465.8982 | 443.10026 |
| ENSMUSG Gm40193   | 0        | 0        | 0        | 0        | 0        | 0         |
| ENSMUSG Olfr730   | 0        | 0        | 0        | 0        | 0        | 0         |
| ENSMUSG Tlx2      | 0        | 0        | 0        | 0        | 0        | 0         |
| ENSMUSG Slc4a5    | 13.99883 | 15.10752 | 8.64642  | 10.9449  | 10.05505 | 9.893524  |
| ENSMUSG Htra2     | 11.48277 | 11.70958 | 17.10197 | 15.07318 | 13.97989 | 15.126648 |
| ENSMUSG Aup1      | 58.89946 | 53.29275 | 58.75316 | 61.5097  | 65.81522 | 69.709513 |
| ENSMUSG Nmral1    | 1.315068 | 1.314195 | 0.911093 | 3.232565 | 2.531836 | 3.145074  |
| ENSMUSG Ube2d2b   | 0.033617 | 0        | 0        | 0.236135 | 0.042729 | 0.118327  |
| ENSMUSG Plppr1    | 0        | 0.074922 | 0.005174 | 0        | 0        | 0         |
| ENSMUSG Plekhd1   | 6.576626 | 7.01675  | 6.914172 | 6.049437 | 5.072883 | 6.787928  |
| ENSMUSG Gm28553   | 0        | 0        | 0        | 0        | 0        | 0         |
| ENSMUSG Gm20518   | 0.805655 | 1.181158 | 1.776484 | 1.381533 | 0.74649  | 1.050364  |
| ENSMUSG Vmn1r180  | 0        | 0        | 0        | 0        | 0        | 0         |
| ENSMUSG Kera      | 0        | 0        | 0        | 0        | 0        | 0         |
| ENSMUSG Mrln      | 0        | 0        | 0.2171   | 0        | 0        | 0.192917  |
| ENSMUSG Slc17a8   | 0.050468 | 0.0561   | 0.049437 | 0.059828 | 0.041143 | 0.090605  |
| ENSMUSG Epyc      | 0        | 0        | 0        | 0        | 0        | 0         |
| ENSMUSG Ppp2ca    | 22.30843 | 23.14574 | 23.36897 | 21.55132 | 21.923   | 21.65703  |
| ENSMUSG Arih2     | 14.48986 | 14.82662 | 14.08399 | 15.69286 | 13.7356  | 13.688206 |
| ENSMUSG Mgat1     | 48.30667 | 46.27106 | 48.52089 | 52.5608  | 54.86799 | 52.036018 |

|                   |          |          |          |          |          |           |
|-------------------|----------|----------|----------|----------|----------|-----------|
| ENSMUSG Rab44     | 3.032202 | 2.833975 | 3.134631 | 3.121827 | 3.172959 | 4.118676  |
| ENSMUSG Ccl26     | 0        | 0        | 0        | 0        | 0        | 0         |
| ENSMUSG Zfp69     | 3.802925 | 4.104351 | 3.767977 | 2.580251 | 3.362534 | 2.820039  |
| ENSMUSG Trim38    | 0        | 0        | 0        | 0        | 0        | 0.02755   |
| ENSMUSG Pcdha9    | 0        | 0.068879 | 0.094014 | 0.014326 | 0.016755 | 0         |
| ENSMUSG Cyfip2    | 5.29138  | 5.017242 | 5.577553 | 11.39657 | 10.71988 | 10.741534 |
| ENSMUSG Trim60    | 0        | 0        | 0        | 0        | 0        | 0         |
| ENSMUSG Gm45234   | 0.041896 | 0.006862 | 0        | 0.008487 | 0.049397 | 0.033281  |
| ENSMUSG Phactr1   | 31.59947 | 29.28086 | 29.56114 | 19.80456 | 20.36032 | 18.798205 |
| ENSMUSG Vmac      | 11.06629 | 10.03086 | 9.990744 | 11.20985 | 9.524648 | 9.992185  |
| ENSMUSG Lrrc8c    | 12.94529 | 12.2354  | 12.38544 | 10.82079 | 10.89313 | 12.559359 |
| ENSMUSG 1700013H  | 0        | 0        | 0        | 0        | 0        | 0         |
| ENSMUSG Olfr701   | 0        | 0        | 0        | 0        | 0        | 0         |
| ENSMUSG Ttll7     | 14.922   | 13.49    | 12.42879 | 8.094818 | 8.553634 | 8.281343  |
| ENSMUSG Gm10715   | 0        | 0        | 0        | 0        | 0        | 0         |
| ENSMUSG Psmc8     | 0.229261 | 0.177565 | 0.149427 | 0.216241 | 0.283238 | 0.454152  |
| ENSMUSG Otud7a    | 0.038492 | 0        | 0.044429 | 0.031326 | 0        | 0.006875  |
| ENSMUSG Cuedc2    | 19.38299 | 20.07159 | 19.1235  | 18.29958 | 18.52312 | 19.230529 |
| ENSMUSG Prame15   | 0        | 0        | 0        | 0        | 0        | 0         |
| ENSMUSG Olfr510   | 0        | 0        | 0        | 0        | 0.015232 | 0         |
| ENSMUSG Hgs       | 18.60415 | 17.80935 | 18.63837 | 17.23513 | 15.18496 | 16.465189 |
| ENSMUSG Hikeshi   | 8.583634 | 9.966995 | 8.825284 | 6.768787 | 8.415895 | 7.888126  |
| ENSMUSG Zfp599    | 0.301934 | 0.387975 | 0.14386  | 0.353242 | 0.379549 | 0.432121  |
| ENSMUSG Olfr1158  | 0        | 0        | 0        | 0        | 0        | 0         |
| ENSMUSG 2-Sep     | 16.2261  | 11.43809 | 24.18754 | 15.74479 | 17.85732 | 12.853275 |
| ENSMUSG Gm382     | 0        | 0        | 0        | 0        | 0        | 0         |
| Mus_musc Mus_musc | 6.783384 | 6.054041 | 5.0403   | 7.893232 | 2.402153 | 9.36123   |
| ENSMUSG Arf2      | 29.25097 | 26.40918 | 28.45145 | 21.67735 | 21.15851 | 21.521947 |
| ENSMUSG Olfr304   | 0        | 0        | 0        | 0        | 0        | 0         |
| ENSMUSG Rab3d     | 21.7298  | 21.69979 | 20.1357  | 20.44178 | 22.27513 | 22.314036 |
| ENSMUSG Cdcp1     | 5.465465 | 4.377138 | 4.543046 | 4.152137 | 4.167775 | 4.983677  |
| ENSMUSG Ubl4b     | 0        | 0        | 0        | 0.037639 | 0.038765 | 0         |
| ENSMUSG Oosp2     | 0        | 0        | 0        | 0        | 0.184689 | 0.072806  |
| ENSMUSG Gm44596   | 0        | 0        | 0        | 0        | 0        | 0         |
| ENSMUSG Cldn34b3  | 0        | 0        | 0        | 0        | 0        | 0         |
| ENSMUSG 4930522H  | 0        | 0        | 0        | 0        | 0        | 0         |
| ENSMUSG Olfr1330  | 0        | 0        | 0        | 0        | 0        | 0         |
| ENSMUSG Rpl10l    | 0        | 0        | 0        | 0        | 0        | 0         |
| ENSMUSG Mtmr2     | 27.37769 | 27.47616 | 25.49906 | 21.16939 | 20.34539 | 20.064463 |
| ENSMUSG Tmed6     | 1.464314 | 1.325536 | 0.814617 | 0.84291  | 1.166666 | 1.230728  |
| ENSMUSG Cog8      | 11.41578 | 11.54839 | 11.36076 | 11.62083 | 10.62958 | 12.334255 |
| ENSMUSG Nip7      | 5.12108  | 6.07458  | 4.477476 | 5.659108 | 5.751858 | 5.021564  |
| ENSMUSG Has3      | 0.515931 | 0.883775 | 0.557082 | 2.403021 | 2.890117 | 2.186065  |
| ENSMUSG Vps4a     | 25.41925 | 25.66299 | 27.07036 | 19.1933  | 21.39898 | 22.710342 |
| ENSMUSG Gm5105    | 0        | 0        | 0.022804 | 0        | 0        | 0         |
| ENSMUSG Lrrc56    | 2.856824 | 3.564737 | 2.494949 | 3.696876 | 3.683961 | 3.367308  |
| ENSMUSG Degs1     | 54.7239  | 51.64669 | 52.7334  | 51.79818 | 54.26816 | 53.898326 |
| ENSMUSG Zkscan16  | 0.078941 | 0.073896 | 0.036278 | 0.053999 | 0.020046 | 0.016283  |
| ENSMUSG Pzp       | 0        | 0.063688 | 0        | 0.021115 | 0.067402 | 0.012316  |
| ENSMUSG Fkbp4     | 79.63645 | 106.0246 | 96.27835 | 71.26264 | 80.50753 | 83.490089 |
| ENSMUSG Tspan11   | 16.20689 | 17.42769 | 14.91583 | 14.13744 | 15.14288 | 15.964808 |
| ENSMUSG Prmt8     | 1.554538 | 1.683863 | 2.534545 | 2.211966 | 2.880127 | 2.885618  |
| ENSMUSG Tead4     | 12.35123 | 10.16589 | 10.19866 | 6.01147  | 6.589578 | 6.562246  |
| ENSMUSG Tspan9    | 95.27081 | 94.34425 | 103.6165 | 74.06349 | 81.95172 | 80.121383 |
| ENSMUSG Pnlcd1    | 0.028403 | 0.135521 | 0.133109 | 0.09125  | 0.178661 | 0.075453  |
| ENSMUSG Sft2d1    | 21.41473 | 18.11103 | 24.74656 | 24.95962 | 22.04734 | 24.649498 |
| ENSMUSG Ucn2      | 0        | 0.02485  | 0.081323 | 0        | 0.04639  | 0.095681  |
| ENSMUSG BC048671  | 0.0543   | 0        | 0        | 0.095766 | 0.042822 | 0.089512  |
| ENSMUSG Nckap5    | 30.83083 | 23.5421  | 23.29461 | 14.93428 | 12.95972 | 13.71386  |
| ENSMUSG Nkx3-2    | 0        | 0        | 0        | 0        | 0        | 0         |
| ENSMUSG Tmem239   | 0        | 0        | 0        | 0        | 0        | 0         |
| ENSMUSG Fbxo33    | 6.90482  | 6.279865 | 5.713563 | 5.749021 | 5.994825 | 6.145532  |
| ENSMUSG Sec31a    | 32.37885 | 30.65642 | 31.70843 | 30.0308  | 32.96427 | 31.751468 |
| ENSMUSG Zfp992    | 0.813005 | 0.934172 | 0.799634 | 1.806493 | 1.835128 | 1.49048   |

|                  |          |          |          |          |          |           |
|------------------|----------|----------|----------|----------|----------|-----------|
| ENSMUSG Msrb1    | 44.76702 | 44.20323 | 50.23411 | 50.70091 | 50.38418 | 48.563963 |
| ENSMUSG Txnrd2   | 4.382132 | 4.794347 | 5.032377 | 5.01993  | 3.906932 | 4.701699  |
| ENSMUSG Dio3     | 0        | 0.018501 | 0.056544 | 0.132903 | 0.027935 | 0.152535  |
| ENSMUSG Gpx4     | 222.9796 | 222.8594 | 228.6002 | 212.6852 | 201.8537 | 222.72506 |
| ENSMUSG Selenos  | 63.61824 | 62.36651 | 67.35593 | 67.02313 | 65.77733 | 59.19371  |
| ENSMUSG Ogfod2   | 10.27172 | 10.80002 | 10.39    | 10.30924 | 10.30703 | 11.467879 |
| ENSMUSG Selenoi  | 4.810201 | 4.470458 | 4.282249 | 4.351836 | 4.069223 | 4.30489   |
| ENSMUSG Selenom  | 31.5954  | 27.30434 | 29.36968 | 27.26835 | 30.50624 | 33.491158 |
| ENSMUSG Dpp7     | 7.35905  | 6.866671 | 7.133535 | 12.31521 | 13.25338 | 14.240708 |
| ENSMUSG Grin1    | 0.107439 | 0.101766 | 0.114475 | 0.228752 | 0.136046 | 0.141586  |
| ENSMUSG St8sia3  | 0.006795 | 0.021542 | 0.01904  | 0        | 0        | 0         |
| ENSMUSG Fam89a   | 1.057642 | 1.203681 | 1.368408 | 0.611428 | 0.185437 | 0.553315  |
| ENSMUSG Gm6812   | 0        | 0        | 0        | 0        | 0        | 0         |
| ENSMUSG Tmem18   | 11.08278 | 11.16683 | 9.820444 | 10.22976 | 9.182046 | 9.675698  |
| ENSMUSG Fscb     | 0        | 0        | 0        | 0        | 0        | 0         |
| ENSMUSG Spice1   | 4.571253 | 4.475919 | 3.901852 | 4.117962 | 4.804171 | 4.104642  |
| ENSMUSG Dpy1911  | 7.902617 | 8.520841 | 9.786817 | 9.274843 | 9.682426 | 8.660233  |
| ENSMUSG Vmn1r66  | 0        | 0        | 0        | 0        | 0        | 0         |
| ENSMUSG Laptm4b  | 38.02749 | 42.74243 | 34.52231 | 27.32947 | 24.42813 | 25.629094 |
| ENSMUSG Mtdh     | 18.92036 | 16.76738 | 17.07155 | 21.94605 | 18.82301 | 20.320892 |
| ENSMUSG Enam     | 0        | 0        | 0        | 0        | 0        | 0         |
| ENSMUSG Smr2     | 0        | 0        | 0        | 0        | 0        | 0         |
| ENSMUSG Smr3a    | 0        | 0        | 0        | 0        | 0        | 0         |
| ENSMUSG Cdc7     | 1.049405 | 1.252096 | 1.473774 | 1.564493 | 1.686743 | 1.41654   |
| ENSMUSG Amtn     | 0.205142 | 0        | 0.132736 | 0.196662 | 0.203133 | 0.134085  |
| ENSMUSG Ambn     | 0        | 0        | 0        | 0        | 0        | 0.029804  |
| ENSMUSG Atp6ap2  | 32.01373 | 33.21039 | 33.43707 | 41.86989 | 44.60896 | 47.065624 |
| ENSMUSG Gm128    | 0.361216 | 0.211824 | 0.270589 | 0.089139 | 0.16415  | 0.139394  |
| ENSMUSG Ppp1r8   | 18.7098  | 17.2635  | 18.23849 | 17.06766 | 16.13427 | 17.459865 |
| ENSMUSG Sema3a   | 12.84104 | 11.18715 | 10.60128 | 9.541383 | 8.176149 | 8.147586  |
| ENSMUSG Rpa2     | 8.347901 | 5.7441   | 7.278675 | 6.602947 | 8.01311  | 8.049146  |
| ENSMUSG Smpdl3b  | 1.466851 | 2.275485 | 4.31402  | 2.977099 | 1.911622 | 2.293284  |
| ENSMUSG Eya3     | 9.500721 | 9.945955 | 8.660259 | 10.28919 | 9.796078 | 11.59633  |
| ENSMUSG Yrdc     | 7.317415 | 8.156336 | 8.42791  | 7.966672 | 7.555957 | 6.807328  |
| ENSMUSG Zyg11b   | 9.661464 | 10.91545 | 8.494246 | 8.555884 | 8.670594 | 8.580203  |
| ENSMUSG Ly6d     | 1.764311 | 1.448931 | 2.298122 | 2.17567  | 3.979257 | 3.348526  |
| ENSMUSG Sp8      | 0        | 0        | 0        | 0        | 0        | 0         |
| ENSMUSG 4933424G | 0        | 0        | 0        | 0        | 0.036172 | 0         |
| ENSMUSG Sh2d1b1  | 5.564961 | 6.13064  | 4.661848 | 5.664485 | 5.584405 | 5.763821  |
| ENSMUSG Rimbp2   | 0.182816 | 0.213285 | 0.090633 | 0.2196   | 0.118083 | 0.138338  |
| ENSMUSG Piwil1   | 0        | 0        | 0        | 0        | 0        | 0         |
| ENSMUSG Rsrc2    | 33.22289 | 39.03218 | 37.65473 | 35.09617 | 31.0024  | 31.486374 |
| ENSMUSG Zcchc8   | 12.72944 | 11.79184 | 11.16562 | 9.94588  | 10.32626 | 9.152064  |
| ENSMUSG Scarb2   | 82.31789 | 86.31554 | 79.6825  | 63.58622 | 67.77531 | 67.439301 |
| ENSMUSG Stx2     | 8.681806 | 7.985364 | 9.062664 | 7.763929 | 7.749876 | 8.24886   |
| ENSMUSG Gdpd4    | 0        | 0        | 0.013834 | 0        | 0        | 0         |
| ENSMUSG Kcnh8    | 0        | 0        | 0        | 0        | 0.03854  | 0         |
| ENSMUSG Tsen34   | 41.46665 | 35.29319 | 40.67328 | 33.5995  | 38.85792 | 39.116709 |
| ENSMUSG Alox5    | 5.944119 | 5.72495  | 5.483808 | 6.106388 | 6.353298 | 6.613272  |
| ENSMUSG 8-Mar    | 27.17762 | 27.41966 | 23.28339 | 21.632   | 23.10381 | 23.548255 |
| ENSMUSG Hrh2     | 0.433998 | 0.392754 | 0.707851 | 0.954444 | 0.797924 | 0.764034  |
| ENSMUSG Parm1    | 2.414134 | 2.837366 | 2.629594 | 3.356198 | 3.561058 | 2.764211  |
| ENSMUSG Rad17    | 9.50315  | 9.032433 | 8.573679 | 7.810736 | 9.215128 | 9.27316   |
| ENSMUSG Marveld2 | 8.936493 | 9.458283 | 7.268103 | 5.890386 | 5.140389 | 5.601628  |
| ENSMUSG Cd59a    | 5.746912 | 5.244954 | 6.202152 | 5.304824 | 5.604541 | 5.760405  |
| ENSMUSG Ocln     | 23.73277 | 23.04278 | 19.2204  | 13.42804 | 13.54528 | 13.58121  |
| ENSMUSG Gtf2h2   | 6.262792 | 6.510779 | 6.805868 | 7.66687  | 7.775106 | 6.36766   |
| ENSMUSG Prorsd1  | 5.201267 | 4.922854 | 5.841761 | 6.438559 | 4.331041 | 6.096416  |
| ENSMUSG Traip    | 0.222775 | 0.249427 | 0.318394 | 0.403594 | 0.651181 | 0.692706  |
| ENSMUSG Nlrc5    | 3.006998 | 2.508873 | 12.76709 | 9.478442 | 3.62236  | 5.320503  |
| ENSMUSG Rbm6     | 16.89007 | 17.19869 | 16.24556 | 15.82845 | 14.39049 | 14.195149 |
| ENSMUSG Ces1h    | 0.025138 | 0.104963 | 0.024392 | 0        | 0        | 0.025018  |
| ENSMUSG Rbm5     | 38.29006 | 38.23056 | 39.47605 | 32.69007 | 30.29681 | 32.524632 |
| ENSMUSG Zfp976   | 1.840662 | 2.012795 | 1.374336 | 1.316466 | 1.522162 | 1.686583  |

|                         |          |          |          |          |          |           |
|-------------------------|----------|----------|----------|----------|----------|-----------|
| ENSMUSG Bsn             | 0.08387  | 0.118864 | 0.183807 | 0.158436 | 0.133583 | 0.160519  |
| ENSMUSG Foxn4           | 0.078305 | 0.141109 | 0.056125 | 0.588862 | 0.30158  | 0.509749  |
| ENSMUSG Cd109           | 0.158736 | 0.13901  | 0.273008 | 0.392101 | 0.321455 | 0.424587  |
| ENSMUSG Prlhr           | 0        | 0        | 0        | 0        | 0        | 0         |
| ENSMUSG Kcng3           | 0        | 0.011955 | 0.012081 | 0        | 0        | 0         |
| ENSMUSG 3110040M        | 0        | 0        | 0        | 0        | 0.025946 | 0         |
| ENSMUSG Ppp6c           | 17.12743 | 17.63653 | 17.9066  | 14.29745 | 14.90852 | 14.028292 |
| ENSMUSG Nr5a1           | 0        | 0        | 0.016615 | 0        | 0        | 0         |
| ENSMUSG Tesk2           | 1.80248  | 1.613102 | 1.712589 | 1.366856 | 2.081207 | 2.327157  |
| ENSMUSG Dnah17          | 0.104475 | 0.093243 | 0.162069 | 0.138809 | 0.1134   | 0.075005  |
| ENSMUSG Gria2           | 0        | 0        | 0.004919 | 0.027602 | 0        | 0         |
| ENSMUSG Coil            | 2.786284 | 2.638884 | 2.561972 | 3.283145 | 2.816391 | 3.179915  |
| ENSMUSG Pdzd9           | 0        | 0.088504 | 0        | 0        | 0.082297 | 0.030095  |
| ENSMUSG Mrpl49          | 15.67241 | 16.8393  | 15.34741 | 13.46447 | 14.78031 | 15.149656 |
| ENSMUSG Rsb1            | 7.695769 | 7.994396 | 7.467468 | 6.643412 | 7.133802 | 6.013488  |
| ENSMUSG C130050O        | 1.484158 | 1.782773 | 1.876062 | 1.739091 | 1.170388 | 2.275839  |
| ENSMUSG Wipf1           | 17.85511 | 17.41905 | 19.88242 | 21.36428 | 19.36841 | 19.706441 |
| ENSMUSG Carns1          | 0.965272 | 0.932039 | 1.195371 | 1.556059 | 1.155865 | 1.066869  |
| ENSMUSG Scyl1           | 32.47849 | 32.2022  | 32.47606 | 28.94226 | 31.9374  | 33.716442 |
| ENSMUSG Ltbp3           | 22.3812  | 20.82561 | 24.04825 | 21.21038 | 17.94039 | 21.435986 |
| ENSMUSG Smc5            | 7.168243 | 7.411061 | 6.813718 | 6.27525  | 6.043919 | 6.130125  |
| ENSMUSG Capn1           | 23.4047  | 23.23373 | 25.77332 | 22.33669 | 24.18496 | 24.95232  |
| ENSMUSG Arl2            | 19.88001 | 21.1667  | 21.37101 | 19.16818 | 13.33969 | 18.306808 |
| ENSMUSG Men1            | 16.51661 | 17.05534 | 17.20688 | 14.52228 | 15.81272 | 16.540609 |
| ENSMUSG Epas1           | 695.0369 | 606.5093 | 583.3383 | 417.2824 | 416.4873 | 379.08273 |
| ENSMUSG Sf1             | 54.91796 | 52.24506 | 59.92703 | 45.57157 | 47.11256 | 51.082441 |
| ENSMUSG Map4k2          | 35.34907 | 30.90506 | 37.67042 | 24.52561 | 24.32411 | 23.207698 |
| ENSMUSG Mlst8           | 4.129181 | 4.291418 | 4.694909 | 4.037223 | 3.963944 | 4.319101  |
| ENSMUSG Uqcr10          | 70.03153 | 80.36242 | 81.34782 | 82.83831 | 84.81102 | 96.040192 |
| ENSMUSG Kctd14          | 1.263918 | 1.6882   | 1.701435 | 2.586197 | 2.634189 | 2.328336  |
| ENSMUSG Kcnf1           | 1.266788 | 0.807828 | 0.820976 | 0.609329 | 0.636212 | 0.874663  |
| ENSMUSG Wdcp            | 2.47473  | 2.673616 | 2.2774   | 2.058986 | 1.77082  | 2.159433  |
| Mus_musc Mus_musc       | 0        | 0        | 0.255365 | 0        | 0.294598 | 0.329808  |
| ENSMUSG Tmem145         | 0        | 0        | 0        | 0        | 0.019823 | 0         |
| Mus_musc Mus_musc       | 1.404841 | 0.730981 | 2.423513 | 1.737967 | 1.714466 | 2.803451  |
| ENSMUSG Ankrd39         | 3.043616 | 2.960843 | 2.523059 | 2.817071 | 3.298957 | 2.551015  |
| Mus_musc Mus_musc       | 0        | 0        | 0        | 0        | 0        | 0         |
| ENSMUSG Fam243          | 0        | 0        | 0.018932 | 0        | 0        | 0.014861  |
| Mus_musc Mus_musc       | 0.112667 | 0        | 0        | 0.224742 | 0.251695 | 0         |
| ENSMUSG Olfr1273- $\mu$ | 0        | 0        | 0        | 0        | 0        | 0         |
| ENSMUSG Pcyt1a          | 30.74528 | 30.18968 | 25.46084 | 26.16021 | 26.57266 | 28.816429 |
| ENSMUSG Eif4g2          | 104.9897 | 110.0411 | 101.9649 | 97.56258 | 97.12039 | 95.205475 |
| ENSMUSG Mrvi1           | 1.486706 | 1.430353 | 1.313772 | 2.184765 | 2.246876 | 1.85561   |
| ENSMUSG Tmem270         | 0        | 0        | 0        | 0        | 0        | 0         |
| ENSMUSG Rundc3b         | 0.493781 | 0.39896  | 0.437181 | 0.451675 | 0.371303 | 0.422521  |
| ENSMUSG Mblac2          | 2.358495 | 2.712754 | 2.552443 | 1.817385 | 2.101976 | 2.371334  |
| ENSMUSG Olfr986         | 0        | 0        | 0        | 0        | 0        | 0         |
| ENSMUSG Vmn2r74         | 0        | 0        | 0        | 0        | 0        | 0         |
| ENSMUSG Vmn1r193        | 0        | 0        | 0        | 0        | 0        | 0         |
| ENSMUSG Csl             | 0.028787 | 0.035565 | 0.024912 | 0        | 0        | 0.017919  |
| ENSMUSG Slamf9          | 4.529796 | 4.533966 | 4.467866 | 10.0826  | 8.367599 | 9.919966  |
| ENSMUSG Apcs            | 0        | 0        | 0        | 0        | 0        | 0         |
| ENSMUSG Tagln2          | 311.1781 | 297.0351 | 313.6583 | 244.4401 | 247.7822 | 274.32109 |
| ENSMUSG Cfap45          | 3.774246 | 5.034865 | 3.226415 | 7.727469 | 6.111969 | 6.587989  |
| ENSMUSG Dusp23          | 4.50822  | 4.444326 | 3.768175 | 2.828565 | 3.508757 | 2.716421  |
| ENSMUSG Nkap1           | 0.518597 | 0.44331  | 0.472975 | 0.698919 | 0.564288 | 0.587684  |
| ENSMUSG Olfr54          | 0        | 0        | 0        | 0        | 0        | 0         |
| Mus_musc Mus_musc       | 0        | 0        | 0        | 0        | 0        | 0.076984  |
| ENSMUSG Plp1            | 0.78758  | 0.365429 | 0.445223 | 0.557924 | 0.456003 | 0.496176  |
| ENSMUSG Olfr1290        | 0        | 0        | 0        | 0        | 0        | 0         |
| Mus_musc Mus_musc       | 0.188031 | 0.212825 | 0.24685  | 0.354911 | 0.191886 | 0         |
| Mus_musc Mus_musc       | 0.336818 | 0.290922 | 0.186372 | 0.012084 | 0        | 0.299091  |
| Mus_musc Mus_musc       | 5.305726 | 6.422126 | 6.833431 | 8.879855 | 7.449581 | 9.027319  |
| Mus_musc Mus_musc       | 4.337452 | 5.082231 | 5.203898 | 6.546229 | 7.123217 | 5.732403  |



|                   |          |          |          |          |          |           |
|-------------------|----------|----------|----------|----------|----------|-----------|
| ENSMUSG Cp        | 30.44188 | 32.42099 | 25.08183 | 60.49698 | 72.75304 | 63.153505 |
| ENSMUSG Olfr824   | 0        | 0        | 0        | 0        | 0        | 0         |
| ENSMUSG Gm5728    | 0        | 0        | 0        | 0        | 0        | 0         |
| ENSMUSG Atp1a4    | 0.953325 | 0.71129  | 1.010258 | 0.29327  | 0.319045 | 0.362003  |
| Mus_musc Mus_musc | 0.133339 | 0.093768 | 0.255594 | 0.554122 | 0.356968 | 0.439833  |
| Mus_musc Mus_musc | 2.068771 | 1.705022 | 1.066801 | 1.337561 | 1.096457 | 1.105117  |
| Mus_musc Mus_musc | 0.712632 | 0.728585 | 0.29968  | 0.593566 | 0.274462 | 0.326733  |
| Mus_musc Mus_musc | 0        | 0        | 0        | 0        | 0.186714 | 0         |
| ENSMUSG Leng9     | 3.595328 | 3.780623 | 3.523982 | 3.332254 | 2.884019 | 2.530655  |
| ENSMUSG Rbp1      | 11.39267 | 9.69372  | 12.71912 | 9.169378 | 7.892679 | 7.373979  |
| ENSMUSG Ankrd66   | 2.085322 | 1.947874 | 1.537099 | 2.483092 | 2.34301  | 2.72869   |
| Mus_musc Mus_musc | 0.401134 | 0.173556 | 0        | 0        | 0.08515  | 0.139031  |
| ENSMUSG Rab34     | 16.48184 | 14.56885 | 14.20191 | 13.11501 | 12.26681 | 12.442012 |
| ENSMUSG Unc119    | 13.75673 | 13.76997 | 13.79176 | 16.26003 | 16.67848 | 19.992653 |
| ENSMUSG Foxn1     | 0        | 0        | 0        | 0        | 0        | 0         |
| ENSMUSG Spag5     | 0.35144  | 0.448716 | 0.40124  | 1.174464 | 1.538543 | 1.435535  |
| ENSMUSG Supt6     | 21.08882 | 21.23152 | 20.35396 | 19.35537 | 19.19732 | 19.463367 |
| ENSMUSG Kcnj11    | 0.113704 | 0.737071 | 0.070112 | 0.493304 | 0.198932 | 0.570153  |
| ENSMUSG Ppp1r15b  | 24.86314 | 24.85701 | 24.21293 | 23.62576 | 23.36728 | 23.118073 |
| Mus_musc Mus_musc | 0.309452 | 0        | 0        | 0        | 0        | 0.15804   |
| Mus_musc Mus_musc | 1.582826 | 1.11679  | 2.045461 | 1.561356 | 1.880555 | 0.889843  |
| Mus_musc Mus_musc | 5.542171 | 4.423796 | 4.588952 | 5.782974 | 10.14636 | 6.586532  |
| Mus_musc Mus_musc | 0.208393 | 0.276906 | 0.376668 | 0        | 0.513696 | 0         |
| Mus_musc Mus_musc | 0.953343 | 0.716727 | 1.111296 | 0.39907  | 0.577531 | 0.185567  |
| Mus_musc Mus_musc | 0.944252 | 1.395562 | 1.751618 | 1.57279  | 1.401307 | 1.614597  |
| ENSMUSG Col20a1   | 1.206849 | 1.350232 | 1.074183 | 1.345111 | 1.471434 | 1.29751   |
| Mus_musc Mus_musc | 0.084422 | 0.182757 | 0.363723 | 0.065463 | 0.07201  | 0         |
| Mus_musc Mus_musc | 0        | 0        | 0        | 0        | 0        | 0.239203  |
| Mus_musc Mus_musc | 0.581295 | 0.153019 | 0.391705 | 0.466467 | 0.417244 | 0.52656   |
| Mus_musc Mus_musc | 0.683293 | 1.111423 | 0.711792 | 0.283941 | 0.262287 | 0.449365  |
| Mus_musc Mus_musc | 0        | 0.109753 | 0        | 0        | 0.072789 | 0         |
| Mus_musc Mus_musc | 1.823708 | 1.625155 | 1.611742 | 3.398609 | 3.715418 | 2.716809  |
| Mus_musc Mus_musc | 0        | 0        | 0.259149 | 0        | 0.310542 | 0         |
| Mus_musc Mus_musc | 0        | 0        | 0        | 0.174016 | 0        | 0.13988   |
| Mus_musc Mus_musc | 0        | 0        | 0        | 0.287997 | 0        | 0.060781  |
| Mus_musc Mus_musc | 0.034451 | 0.068964 | 0        | 0.180274 | 0.266932 | 0         |
| ENSMUSG Clasp1    | 8.996011 | 9.339011 | 6.571171 | 6.310335 | 8.655962 | 8.569984  |
| ENSMUSG Lrrc51    | 7.84907  | 6.963312 | 8.880922 | 15.13698 | 12.86687 | 11.907898 |
| ENSMUSG 2410137M  | 0.08995  | 0.033191 | 0.049844 | 0.05715  | 0        | 0         |
| ENSMUSG Olfr857   | 0        | 0        | 0        | 0        | 0        | 0         |
| ENSMUSG AK157302  | 7.5302   | 8.638151 | 9.588268 | 6.963134 | 6.545731 | 7.163974  |
| Mus_musc Mus_musc | 0.040293 | 0.031193 | 0.45287  | 0.376248 | 0        | 0.231417  |
| ENSMUSG Olfr316   | 0        | 0        | 0        | 0.051637 | 0        | 0         |
| ENSMUSG Krtap1-3  | 0        | 0        | 0        | 0        | 0        | 0         |
| Mus_musc Mus_musc | 0.302286 | 0.044509 | 0.149139 | 0.182313 | 0.210502 | 0.189236  |
| Mus_musc Mus_musc | 0        | 0.140138 | 0.125057 | 0.091689 | 0.21596  | 0.086796  |
| Mus_musc Mus_musc | 0        | 0        | 0        | 0        | 0        | 0.140811  |
| Mus_musc Mus_musc | 0        | 0        | 0.480497 | 0        | 0        | 0.175607  |
| Mus_musc Mus_musc | 1.120703 | 0.520026 | 0.993835 | 0.659387 | 1.073372 | 1.164212  |
| ENSMUSG Ankrd63   | 0.149659 | 0.11993  | 0.102244 | 0.10335  | 0.057071 | 0.025235  |
| ENSMUSG Gm9611    | 0        | 0        | 0        | 0        | 0        | 0         |
| ENSMUSG Ralgps1   | 2.020368 | 2.350727 | 2.092278 | 2.410823 | 2.041277 | 2.383126  |
| ENSMUSG Dnajc7    | 35.40737 | 33.47737 | 38.76793 | 39.21584 | 35.20046 | 36.836362 |
| ENSMUSG Zfp385c   | 0        | 0.01187  | 0        | 0        | 0.032945 | 0.018485  |
| ENSMUSG Srsx      | 0        | 0        | 0        | 0        | 0        | 0         |
| Mus_musc Mus_musc | 0        | 0        | 0        | 0        | 0        | 0.223156  |
| Mus_musc Mus_musc | 0.057769 | 0        | 0        | 0.134782 | 0.27313  | 0         |
| ENSMUSG Sgca      | 0.128277 | 1.124088 | 0.323366 | 0.739637 | 0.346854 | 0.422859  |
| ENSMUSG Irx2      | 20.70634 | 16.78071 | 15.30631 | 11.81885 | 13.55126 | 15.62799  |
| Mus_musc Mus_musc | 0.081528 | 0.191061 | 0.084855 | 0        | 0.358563 | 0.378496  |
| ENSMUSG Col1a1    | 15.63144 | 14.13158 | 14.70058 | 36.61453 | 35.08716 | 40.978477 |
| ENSMUSG Itga3     | 65.64003 | 53.48534 | 65.5006  | 38.07764 | 37.86389 | 39.34652  |
| Mus_musc Mus_musc | 0        | 0        | 0        | 0        | 0        | 0.184186  |
| Mus_musc Mus_musc | 0.087465 | 0.332827 | 0.085299 | 0.094378 | 0.038257 | 0.127445  |

|                   |          |          |          |          |          |           |
|-------------------|----------|----------|----------|----------|----------|-----------|
| Mus_musc Mus_musc | 0        | 0        | 0.163487 | 0        | 0.348091 | 0.044561  |
| ENSMUSG Map1s     | 10.34776 | 8.527892 | 10.34323 | 9.336672 | 7.800352 | 8.953448  |
| ENSMUSG Bend4     | 1.318411 | 1.712498 | 1.48159  | 1.37552  | 1.593395 | 1.753663  |
| ENSMUSG Gm5796    | 0.023181 | 0.086114 | 0        | 0        | 0        | 0         |
| ENSMUSG Olfr675   | 0        | 0        | 0        | 0        | 0        | 0         |
| ENSMUSG Amy2a4    | 0        | 0        | 0        | 0        | 0        | 0         |
| ENSMUSG Atad5     | 0.750474 | 0.661875 | 0.697837 | 0.780105 | 0.838716 | 0.979693  |
| ENSMUSG Bnip3l    | 63.93676 | 63.74918 | 61.68911 | 51.99648 | 51.71313 | 51.077289 |
| Mus_musc Mus_musc | 0.704233 | 1.002196 | 0.765446 | 0.620437 | 0.497789 | 0.497024  |
| Mus_musc Mus_musc | 0.376178 | 0        | 0        | 0.088942 | 0        | 0         |
| ENSMUSG Tbkbp1    | 23.00922 | 19.93225 | 25.29211 | 14.02775 | 14.18294 | 13.081348 |
| Mus_musc Mus_musc | 0.369138 | 0        | 0.183253 | 0.200561 | 0        | 0         |
| Mus_musc Mus_musc | 1.805478 | 2.261673 | 1.913177 | 3.059818 | 1.949475 | 2.178623  |
| ENSMUSG Ebf2      | 0.063159 | 0.079675 | 0.102063 | 0.059187 | 0.075947 | 0.028456  |
| ENSMUSG Ppp2r2a   | 16.34132 | 16.42268 | 15.51977 | 12.62053 | 13.93935 | 13.469111 |
| ENSMUSG Nefl      | 0.016689 | 0.06702  | 0.065975 | 0.040106 | 0.051637 | 0.089423  |
| ENSMUSG Kif19a    | 2.005323 | 3.073137 | 1.118209 | 4.09348  | 3.569596 | 3.527689  |
| ENSMUSG Aldh3a2   | 47.81916 | 48.63742 | 43.65759 | 37.5208  | 40.41282 | 41.902687 |
| ENSMUSG Adamdec1  | 1.450968 | 2.091232 | 1.584555 | 3.045354 | 3.258401 | 2.720443  |
| ENSMUSG Gm6993    | 0        | 0        | 0        | 0        | 0        | 0         |
| ENSMUSG Gm21317   | 0        | 0        | 0        | 0        | 0        | 0         |
| ENSMUSG Pou6f1    | 7.200372 | 6.574743 | 6.980277 | 5.730765 | 5.77908  | 6.223594  |
| ENSMUSG C330021F2 | 0.756844 | 0.73615  | 0.838654 | 0.828723 | 0.782418 | 0.807817  |
| ENSMUSG Tacc1     | 48.31224 | 46.71865 | 46.08555 | 35.48938 | 38.7937  | 33.872177 |
| ENSMUSG Defa37    | 0        | 0        | 0        | 0        | 0        | 0         |
| Mus_musc Mus_musc | 0        | 0.093467 | 0.316755 | 0        | 0        | 0         |
| ENSMUSG Vmn1r181  | 0        | 0        | 0        | 0        | 0        | 0         |
| Mus_musc Mus_musc | 0        | 0.367675 | 0        | 0        | 0        | 0         |
| ENSMUSG Gm6763    | 0        | 0        | 0        | 0        | 0        | 0         |
| Mus_musc Mus_musc | 0.142414 | 0        | 0.368171 | 0.16405  | 0.248002 | 0         |
| ENSMUSG Acaa1b    | 14.35705 | 12.20989 | 12.4757  | 2.839196 | 3.495849 | 2.772006  |
| ENSMUSG Lmntd1    | 3.569906 | 2.668545 | 2.925766 | 1.827153 | 1.371283 | 1.202934  |
| ENSMUSG Zfp647    | 1.723967 | 1.933182 | 1.462921 | 1.854188 | 1.687137 | 1.374778  |
| ENSMUSG Sntb2     | 10.90799 | 11.42194 | 9.46113  | 7.961681 | 7.842712 | 7.599494  |
| ENSMUSG Nkx6-2    | 0.111241 | 0.163877 | 0.074312 | 0        | 0        | 0.174931  |
| ENSMUSG Gtf3c3    | 4.420545 | 4.949582 | 4.047868 | 3.976831 | 4.046807 | 4.228807  |
| ENSMUSG Cftr      | 6.183836 | 5.98501  | 5.208141 | 9.50614  | 8.908454 | 10.666043 |
| ENSMUSG Rnf17     | 0        | 0        | 0        | 0        | 0        | 0         |
| Mus_musc Mus_musc | 0        | 0.08787  | 0        | 0        | 0        | 0.716347  |
| ENSMUSG Tnfsf11   | 0.215698 | 0.108072 | 0.079104 | 0.53022  | 0.583622 | 0.748195  |
| ENSMUSG Epsti1    | 3.547422 | 1.953819 | 3.450789 | 3.573333 | 3.042396 | 4.477289  |
| ENSMUSG Akap11    | 14.18353 | 14.24074 | 12.49496 | 10.16156 | 10.29237 | 10.148984 |
| ENSMUSG Tsc22d1   | 146.1259 | 156.3839 | 141.3008 | 81.87935 | 81.99649 | 80.998662 |
| ENSMUSG Dnajc15   | 2.286777 | 3.588115 | 2.382933 | 2.995226 | 2.380302 | 2.626117  |
| ENSMUSG Enox1     | 0.589984 | 0.290596 | 0.378799 | 0.479062 | 0.385444 | 0.502088  |
| ENSMUSG Tdrd3     | 12.96891 | 13.0211  | 13.66271 | 11.50602 | 12.21816 | 11.853191 |
| ENSMUSG Rgcc      | 244.8872 | 195.7158 | 184.5746 | 69.7111  | 119.1054 | 75.980843 |
| ENSMUSG Olfr307   | 0        | 0        | 0        | 0        | 0        | 0         |
| ENSMUSG Cdca7     | 2.259945 | 3.023099 | 2.497244 | 3.263198 | 3.159907 | 2.697181  |
| Mus_musc Mus_musc | 0        | 0        | 0        | 0.203869 | 0.05919  | 0.084394  |
| ENSMUSG Prpsap2   | 9.812714 | 10.1755  | 9.227931 | 9.287313 | 9.169017 | 9.924652  |
| ENSMUSG Myo19     | 1.609931 | 1.801354 | 1.649113 | 1.860175 | 2.002163 | 1.784243  |
| ENSMUSG Znhit3    | 6.791537 | 6.749119 | 5.724191 | 5.822647 | 6.402687 | 5.067793  |
| ENSMUSG Ppm1d     | 7.876046 | 7.035247 | 6.31323  | 5.918107 | 6.415245 | 6.399454  |
| ENSMUSG Gria1     | 2.664101 | 3.159436 | 3.255731 | 1.501713 | 1.427987 | 1.341548  |
| Mus_musc Mus_musc | 0.188031 | 0        | 0        | 0        | 0        | 0         |
| ENSMUSG Mfap3     | 8.644701 | 9.002778 | 9.054369 | 8.184516 | 9.042078 | 8.491085  |
| ENSMUSG Rnft1     | 9.156406 | 8.24704  | 8.145486 | 8.671431 | 8.035187 | 8.262779  |
| ENSMUSG Galnt10   | 2.7524   | 3.384273 | 3.075239 | 4.032525 | 4.166985 | 4.09867   |
| ENSMUSG Olfr907   | 0        | 0        | 0        | 0        | 0        | 0         |
| ENSMUSG Gm21103   | 0        | 0        | 0        | 0        | 0        | 0         |
| ENSMUSG Gm20777   | 0        | 0        | 0        | 0        | 0        | 0         |
| ENSMUSG Gm21973   | 0        | 0        | 0        | 0        | 0.060336 | 0         |
| ENSMUSG Cldn34a   | 0        | 0        | 0        | 0        | 0        | 0         |

|                   |          |          |          |          |          |           |
|-------------------|----------|----------|----------|----------|----------|-----------|
| ENSMUSG Cphx3     | 0.026669 | 0        | 0        | 0.011194 | 0        | 0         |
| ENSMUSG Defa32    | 0        | 0        | 0        | 0        | 0        | 0         |
| ENSMUSG Olfr53    | 0        | 0        | 0        | 0        | 0        | 0         |
| ENSMUSG Atp6v1c2  | 24.82944 | 23.31881 | 19.93931 | 20.70366 | 19.77781 | 24.041864 |
| ENSMUSG Pard3b    | 6.136442 | 6.202692 | 4.516445 | 4.013507 | 3.728719 | 3.997634  |
| ENSMUSG Lypd8     | 0.045041 | 0.532051 | 0.160205 | 1.255209 | 0.276537 | 0.224798  |
| ENSMUSG Sh3bp5l   | 14.74904 | 15.71814 | 15.50962 | 13.96562 | 13.28406 | 13.231307 |
| ENSMUSG Pde8a     | 9.119252 | 9.007401 | 8.411795 | 7.90238  | 8.352396 | 7.051236  |
| ENSMUSG Ldoc1     | 0        | 0        | 0        | 0.069177 | 0        | 0.021966  |
| ENSMUSG Gnai1     | 11.5248  | 10.49608 | 12.05369 | 8.441255 | 8.634077 | 7.541237  |
| ENSMUSG Stil      | 0.092545 | 0.078563 | 0.116757 | 0.517575 | 0.687298 | 0.676593  |
| ENSMUSG Cmpk1     | 17.24824 | 17.95493 | 18.46829 | 21.20024 | 20.20297 | 20.128246 |
| ENSMUSG Atpaf1    | 5.059854 | 3.993321 | 4.662753 | 3.434649 | 4.908557 | 5.262247  |
| ENSMUSG Nptx1     | 0.227931 | 0.202196 | 0.237132 | 0.23479  | 0.258013 | 0.401206  |
| ENSMUSG Cyp4a31   | 0        | 0        | 0        | 0        | 0        | 0         |
| ENSMUSG Cyp4b1    | 514.7122 | 533.9702 | 453.8396 | 234.4587 | 281.4464 | 213.30123 |
| ENSMUSG Cyp4a14   | 0        | 0        | 0        | 0        | 0        | 0         |
| ENSMUSG Pdzk1ip1  | 11.39008 | 12.88684 | 12.30621 | 15.60007 | 13.21867 | 15.839961 |
| ENSMUSG Pla2g2e   | 0        | 0.160091 | 0.173684 | 0.247576 | 0.456675 | 0.533516  |
| Mus_musc Mus_musc | 0        | 0.032072 | 0.09032  | 0.196081 | 0.25478  | 0.104733  |
| Mus_musc Mus_musc | 0        | 0.1572   | 0        | 0.111379 | 0        | 0         |
| Mus_musc Mus_musc | 0        | 0        | 0.168936 | 0        | 0        | 0         |
| Mus_musc Mus_musc | 0.084119 | 0.089326 | 0.06813  | 1.984882 | 3.09032  | 2.56428   |
| Mus_musc Mus_musc | 0        | 0.071846 | 0.695113 | 0        | 0        | 0         |
| ENSMUSG Polg      | 11.8263  | 11.56836 | 12.49955 | 10.66268 | 10.62508 | 12.312044 |
| ENSMUSG 1700003Hi | 0        | 0        | 0        | 0        | 0        | 0         |
| ENSMUSG Mogat2    | 0.081128 | 0.103942 | 0        | 0        | 0        | 0.054118  |
| ENSMUSG Acot4     | 0.091876 | 0.066172 | 0.062994 | 0.021124 | 0.031572 | 0.038453  |
| ENSMUSG Tbc1d19   | 9.840221 | 9.569194 | 9.457493 | 9.570376 | 7.324603 | 7.377441  |
| ENSMUSG Tekt5     | 1.940253 | 1.576389 | 2.339401 | 1.805136 | 1.792006 | 1.971002  |
| Mus_musc Mus_musc | 28.37611 | 28.77362 | 23.47265 | 14.62153 | 13.36275 | 8.282292  |
| ENSMUSG Gm10217   | 0        | 0        | 0        | 0        | 0        | 0         |
| ENSMUSG Syngap1   | 3.248253 | 2.786323 | 2.624375 | 2.950323 | 3.087008 | 3.768195  |
| ENSMUSG Ccdc172   | 0        | 0        | 0        | 0        | 0        | 0         |
| ENSMUSG Pnliprp2  | 0        | 0.055737 | 0        | 0        | 0.051588 | 0.11425   |
| ENSMUSG Hspa12a   | 4.044365 | 5.272489 | 3.810581 | 2.591636 | 2.91384  | 2.102753  |
| ENSMUSG Olfr1238  | 0        | 0        | 0        | 0        | 0        | 0         |
| ENSMUSG Psm6      | 34.38542 | 34.98281 | 33.85337 | 33.58562 | 32.14702 | 34.345291 |
| Mus_musc Mus_musc | 0        | 0        | 0        | 0.263179 | 0.115599 | 0         |
| ENSMUSG Mrps30    | 4.528021 | 3.718635 | 4.303381 | 3.875487 | 4.66309  | 4.657849  |
| ENSMUSG Hcn1      | 0.039864 | 0.040757 | 0.034836 | 0.019308 | 0.027698 | 0.06084   |
| ENSMUSG Slc4a7    | 2.517878 | 2.701132 | 1.971864 | 3.425197 | 3.193584 | 3.525987  |
| ENSMUSG Fgf10     | 3.273777 | 3.122343 | 2.830112 | 1.759027 | 1.933496 | 1.816567  |
| ENSMUSG Atxn7     | 11.34439 | 10.76631 | 11.34031 | 8.565506 | 8.828974 | 8.536237  |
| ENSMUSG Pawr      | 13.14776 | 12.95113 | 12.20092 | 8.157583 | 9.339753 | 9.140018  |
| ENSMUSG Zhx3      | 6.51213  | 8.455952 | 5.551943 | 5.826884 | 6.233585 | 5.318129  |
| ENSMUSG Pcdha1    | 0.056157 | 0.085814 | 0.460613 | 0.177943 | 0        | 0.062531  |
| ENSMUSG Ai182371  | 0.845376 | 0.716768 | 0.927544 | 1.300866 | 1.439225 | 1.602488  |
| ENSMUSG Gm3435    | 7.731647 | 7.12248  | 6.589128 | 6.193615 | 4.682244 | 5.510079  |
| ENSMUSG Hykk      | 3.299823 | 3.085098 | 2.607138 | 2.438933 | 1.944121 | 2.162116  |
| ENSMUSG 4931428L1 | 0        | 0.058489 | 0.093547 | 0.080948 | 0.048158 | 0         |
| ENSMUSG Fbxo31    | 12.47081 | 10.83672 | 10.36169 | 7.109366 | 7.295776 | 7.064344  |
| ENSMUSG Iqcb1     | 4.038934 | 3.887456 | 3.31641  | 4.180216 | 4.105915 | 3.275866  |
| ENSMUSG Mylk      | 38.69979 | 34.97481 | 38.32756 | 36.63863 | 36.32449 | 33.814289 |
| ENSMUSG Ccdc14    | 1.197508 | 1.41982  | 0.960897 | 1.023587 | 1.120213 | 0.967701  |
| ENSMUSG Ropn1     | 0        | 0        | 0        | 0        | 0        | 0         |
| ENSMUSG Hcls1     | 17.88607 | 16.14675 | 24.36049 | 30.65265 | 27.99468 | 31.417458 |
| Mus_musc Mus_musc | 0.185109 | 0.050987 | 0.536382 | 0.392773 | 0.091089 | 0.194251  |
| ENSMUSG Eaf2      | 0.786526 | 0.247974 | 0.590802 | 11.93458 | 10.38448 | 10.57724  |
| ENSMUSG Myl6b     | 1.025376 | 0.915814 | 0.705053 | 0.791157 | 0.674167 | 0.861523  |
| ENSMUSG Trub2     | 5.197498 | 4.456612 | 4.392768 | 4.230124 | 4.969005 | 5.046425  |
| ENSMUSG Wdr70     | 7.937324 | 10.98441 | 9.55867  | 10.15399 | 10.26235 | 10.080618 |
| ENSMUSG Coa6      | 14.78867 | 13.96587 | 12.40244 | 16.76546 | 13.97731 | 16.595762 |
| Mus_musc Mus_musc | 0.255743 | 0.130347 | 0.274549 | 0.2043   | 0.046736 | 0.221911  |

|                   |          |          |          |          |          |           |
|-------------------|----------|----------|----------|----------|----------|-----------|
| ENSMUSG Ccnd1     | 42.9016  | 38.13934 | 45.4176  | 31.55909 | 29.166   | 35.458775 |
| ENSMUSG Hnrnph3   | 23.99061 | 27.18144 | 28.20984 | 20.89493 | 18.12567 | 18.590648 |
| Mus_musc Mus_musc | 0.134155 | 0.806071 | 0.463343 | 0.553826 | 0.296203 | 0         |
| ENSMUSG Slc5a8    | 0        | 0.190857 | 0        | 0.055035 | 0        | 0.030231  |
| ENSMUSG Sirt1     | 10.25184 | 9.379642 | 10.40619 | 7.486023 | 7.721753 | 6.325558  |
| ENSMUSG Mybpc1    | 0        | 0        | 0        | 0        | 0        | 0         |
| ENSMUSG Sox11     | 0.248122 | 0.302176 | 0.268151 | 0.252806 | 0.277893 | 0.095429  |
| ENSMUSG Mypn      | 0.146764 | 0.274556 | 0.053264 | 0.188313 | 0.094948 | 0.068078  |
| ENSMUSG Herc4     | 13.8876  | 13.91716 | 13.50874 | 13.08122 | 12.63397 | 13.459296 |
| ENSMUSG Hsf5      | 0        | 0        | 0.018534 | 0.062023 | 0        | 0         |
| ENSMUSG Cabp7     | 0        | 0.021988 | 0.011844 | 0        | 0        | 0.012997  |
| ENSMUSG Edaradd   | 0.139247 | 0.11837  | 0.081554 | 0.143665 | 0.208027 | 0.158166  |
| Mus_musc Mus_musc | 1.022697 | 0.786385 | 1.232092 | 0.931902 | 0.878707 | 0.870705  |
| ENSMUSG Pdilt     | 0        | 0        | 0        | 0        | 0.050541 | 0         |
| ENSMUSG Umod      | 0        | 0        | 0        | 0.059663 | 0.084278 | 0         |
| ENSMUSG Eef1akmt2 | 5.092131 | 7.876858 | 6.18997  | 6.459338 | 6.607888 | 5.44052   |
| ENSMUSG Trim21    | 6.867371 | 8.062546 | 11.83288 | 8.944188 | 6.665979 | 6.70275   |
| ENSMUSG Zranb1    | 13.01622 | 13.05587 | 12.53342 | 8.983399 | 9.559166 | 8.704738  |
| ENSMUSG Abraxas2  | 11.5355  | 11.70978 | 12.44304 | 11.44368 | 11.57903 | 11.724004 |
| ENSMUSG Sars2     | 2.50878  | 2.414521 | 1.938156 | 3.270438 | 2.655951 | 3.449768  |
| ENSMUSG Slitrk3   | 0.012243 | 0        | 0        | 0        | 0        | 0         |
| ENSMUSG Angptl2   | 27.57473 | 23.60168 | 28.47988 | 12.32362 | 11.38132 | 10.915917 |
| ENSMUSG Utp3      | 19.07059 | 19.48976 | 21.05874 | 18.7023  | 18.39155 | 19.102566 |
| ENSMUSG 5830473C: | 0        | 0.023601 | 0        | 0        | 0        | 0         |
| ENSMUSG Runx3     | 1.580805 | 1.352259 | 2.32841  | 3.672328 | 3.333297 | 4.070603  |
| ENSMUSG Ppan      | 6.797675 | 7.06279  | 7.179584 | 7.589448 | 7.820677 | 8.556444  |
| ENSMUSG Olfr1437  | 0        | 0        | 0        | 0        | 0        | 0         |
| ENSMUSG Zfp994    | 1.514805 | 1.620362 | 1.58792  | 1.901542 | 1.718348 | 1.682369  |
| ENSMUSG Fuk       | 4.286004 | 4.131969 | 4.004052 | 3.53237  | 3.725167 | 3.395182  |
| ENSMUSG Acbd6     | 4.159662 | 4.854402 | 3.332423 | 3.198616 | 3.610321 | 4.146151  |
| ENSMUSG Lrrc24    | 0.326194 | 0.418366 | 0.343341 | 0.312781 | 0.243758 | 0.2423    |
| ENSMUSG Smyd5     | 5.53179  | 5.118073 | 6.305647 | 6.260702 | 6.239625 | 6.644633  |
| ENSMUSG Stard9    | 10.05822 | 9.969428 | 9.549108 | 7.098898 | 7.333165 | 6.844982  |
| ENSMUSG Acp7      | 0        | 0        | 0        | 0.037742 | 0        | 0         |
| ENSMUSG Tedc1     | 0.759829 | 0.686123 | 0.882953 | 1.432559 | 2.024458 | 2.079897  |
| ENSMUSG Klf10     | 16.16279 | 16.92242 | 17.16065 | 13.70382 | 14.32035 | 15.4628   |
| ENSMUSG Fbxo27    | 0.274688 | 0.490185 | 0.396092 | 0.688882 | 0.845263 | 0.580273  |
| ENSMUSG Ints7     | 4.357269 | 3.619125 | 4.160075 | 4.123909 | 4.349928 | 4.385386  |
| ENSMUSG Lgals9    | 53.08845 | 47.2311  | 68.90792 | 40.30782 | 41.65042 | 45.040249 |
| ENSMUSG Lelp1     | 0        | 0        | 0        | 0        | 0        | 0.211696  |
| ENSMUSG Sprr2j-ps | 0        | 0        | 0        | 0        | 0        | 0         |
| ENSMUSG Lce1b     | 0        | 0        | 0        | 0        | 0        | 0         |
| ENSMUSG Tbc1d9    | 4.127914 | 5.106748 | 4.458632 | 7.971216 | 8.538142 | 8.070946  |
| ENSMUSG Tecr      | 72.99303 | 68.56514 | 72.99269 | 65.26337 | 61.23284 | 67.691413 |
| ENSMUSG Rfx1      | 7.141835 | 6.721774 | 7.226577 | 7.126231 | 6.589796 | 6.95752   |
| ENSMUSG Dnaja2    | 47.25942 | 50.2704  | 45.53472 | 40.33617 | 41.00011 | 39.676773 |
| ENSMUSG Gpt2      | 3.614926 | 2.961155 | 2.646288 | 3.733054 | 4.216071 | 4.719242  |
| ENSMUSG Itfg1     | 24.81219 | 26.68141 | 24.34543 | 25.76887 | 26.80831 | 25.814821 |
| ENSMUSG Ncstn     | 33.42309 | 26.42024 | 33.20721 | 29.46962 | 29.67418 | 31.799183 |
| ENSMUSG Fmnl3     | 25.58862 | 23.28663 | 23.66392 | 17.3893  | 17.84539 | 18.509519 |
| ENSMUSG Tuba1b    | 195.3375 | 176.7152 | 226.4508 | 186.9089 | 195.0293 | 224.47018 |
| ENSMUSG Prpf40b   | 11.14741 | 10.39133 | 10.79105 | 8.507832 | 6.080426 | 8.306115  |
| ENSMUSG BC100530  | 0.201397 | 0.303383 | 0.256543 | 0.251325 | 0.236457 | 0         |
| ENSMUSG Dhh       | 1.611334 | 1.416404 | 2.099715 | 1.297618 | 1.467805 | 1.286106  |
| ENSMUSG Bicd1     | 0.852023 | 1.03507  | 0.879207 | 0.931811 | 1.062346 | 1.161515  |
| ENSMUSG Stfa1     | 0        | 0        | 0        | 0        | 0        | 0         |
| ENSMUSG Ndufb3    | 26.0373  | 31.01444 | 34.50571 | 31.93618 | 30.95154 | 29.206556 |
| ENSMUSG Cflar     | 43.94306 | 46.69577 | 45.77614 | 36.63459 | 36.16612 | 33.595212 |
| ENSMUSG Orc2      | 7.126884 | 6.974021 | 6.42067  | 6.746768 | 6.625014 | 6.32383   |
| ENSMUSG Nif3l1    | 4.41761  | 4.464838 | 4.721083 | 4.240053 | 3.900099 | 4.364392  |
| ENSMUSG Ppil3     | 8.617389 | 10.54557 | 11.28476 | 11.55984 | 9.674907 | 10.342017 |
| ENSMUSG Clk1      | 64.33821 | 63.60948 | 70.51771 | 42.80332 | 44.65914 | 47.271982 |
| ENSMUSG Sgo2a     | 0.317548 | 0.245883 | 0.278596 | 0.875199 | 1.101251 | 1.238717  |
| ENSMUSG Nipsnap1  | 5.300661 | 5.841771 | 6.075172 | 6.101678 | 4.810248 | 6.362736  |

|                   |          |          |          |          |          |           |
|-------------------|----------|----------|----------|----------|----------|-----------|
| ENSMUSG Mmp14     | 13.78469 | 13.15764 | 13.68268 | 25.3899  | 25.46428 | 33.573335 |
| ENSMUSG Evpl      | 3.418632 | 2.837089 | 2.59955  | 1.98464  | 2.12655  | 2.101338  |
| ENSMUSG Fbxo36    | 4.983772 | 7.372934 | 4.276653 | 6.857511 | 6.248496 | 5.859413  |
| Mus_musc Mus_musc | 0.142504 | 0.242417 | 0.226705 | 0.183421 | 0.184598 | 0         |
| ENSMUSG Gm10553   | 0.023517 | 0        | 0.110585 | 0        | 0.087914 | 0         |
| ENSMUSG Rab18     | 21.39275 | 21.64475 | 20.90567 | 18.7088  | 18.46534 | 16.126363 |
| ENSMUSG Polr1a    | 3.590764 | 3.105685 | 2.848994 | 3.272514 | 3.112217 | 3.765206  |
| ENSMUSG Fzd9      | 0.049201 | 0.080755 | 0        | 0.031798 | 0        | 0         |
| ENSMUSG Clip1     | 35.42933 | 38.40071 | 35.32036 | 24.89929 | 24.16723 | 22.844232 |
| ENSMUSG Lingo1    | 0.577204 | 1.096862 | 0.89909  | 0.583661 | 0.363605 | 0.823553  |
| ENSMUSG Tmie      | 2.834866 | 2.391849 | 1.63938  | 1.588689 | 1.52552  | 1.780533  |
| ENSMUSG Pcgf1     | 5.767661 | 4.235325 | 5.149084 | 5.281673 | 4.01675  | 3.522456  |
| ENSMUSG Nkain2    | 0.103167 | 0.105554 | 0        | 0        | 0        | 0.014696  |
| ENSMUSG Gm10272   | 0        | 0        | 0        | 0        | 0        | 0         |
| ENSMUSG Krtap10-4 | 0        | 0        | 0        | 0        | 0        | 0         |
| ENSMUSG Krtap12-1 | 0        | 0        | 0        | 0        | 0        | 0         |
| ENSMUSG Tspear    | 0.01599  | 0        | 0.014849 | 0.010458 | 0        | 0.008358  |
| Mus_musc Mus_musc | 0.131433 | 0.17263  | 0        | 0.421832 | 0.094889 | 0.486588  |
| ENSMUSG Gm11733   | 0        | 0        | 0        | 0        | 0        | 0         |
| ENSMUSG Usp27x    | 1.359806 | 1.102454 | 0.935208 | 0.830541 | 0.768683 | 0.688407  |
| ENSMUSG Plekha4   | 1.513675 | 1.767643 | 1.126832 | 1.03281  | 0.896492 | 1.380706  |
| ENSMUSG C87977    | 0        | 0        | 0        | 0        | 0        | 0         |
| ENSMUSG Mtss1     | 14.63922 | 14.61207 | 13.89053 | 16.02712 | 14.4438  | 17.887736 |
| ENSMUSG Washc5    | 14.96432 | 14.43996 | 13.35197 | 14.75045 | 14.57903 | 14.692656 |
| ENSMUSG Sqle      | 13.50452 | 13.24738 | 12.94457 | 18.89823 | 16.11904 | 22.250708 |
| ENSMUSG Kih138    | 1.100902 | 1.306955 | 0.965731 | 0.738467 | 0.93017  | 0.662762  |
| ENSMUSG Ndufb9    | 48.4866  | 60.84    | 63.07881 | 61.51314 | 54.46789 | 58.250145 |
| ENSMUSG Fbxo32    | 3.692125 | 3.460456 | 2.530684 | 6.260444 | 6.575406 | 6.339455  |
| ENSMUSG Wdyhv1    | 8.271109 | 7.301366 | 8.233125 | 11.39907 | 11.63843 | 12.410329 |
| ENSMUSG Mgst1     | 211.0397 | 206.7625 | 156.5839 | 169.6903 | 160.8114 | 169.73755 |
| ENSMUSG Ano8      | 4.746015 | 5.228378 | 5.969575 | 5.497363 | 5.542648 | 5.529387  |
| ENSMUSG Ankrd27   | 10.10183 | 10.49784 | 10.8213  | 8.762158 | 10.24334 | 10.107148 |
| Mus_musc Mus_musc | 0        | 0.302591 | 0        | 0        | 0.074871 | 0         |
| ENSMUSG Whamm     | 6.137682 | 5.399753 | 5.733103 | 5.600335 | 5.399369 | 5.051014  |
| ENSMUSG Lkaaeear1 | 0        | 0        | 0        | 0        | 0        | 0         |
| ENSMUSG 4930402K  | 0        | 0        | 0        | 0        | 0        | 0         |
| ENSMUSG Ccdc149   | 3.549828 | 4.231727 | 3.352626 | 3.311694 | 2.689758 | 2.84421   |
| ENSMUSG Olfr578   | 0        | 0        | 0        | 0        | 0        | 0         |
| ENSMUSG Aqp9      | 0.58824  | 0.45491  | 0.237305 | 2.183704 | 2.207964 | 2.442424  |
| ENSMUSG Pcdha11   | 0        | 0.012967 | 0.003729 | 0        | 0        | 0         |
| ENSMUSG Cldn34c4  | 0        | 0        | 0        | 0        | 0        | 0         |
| Mus_musc Mus_musc | 0.102386 | 0        | 0        | 0.135826 | 0        | 0         |
| Mus_musc Mus_musc | 0        | 0.179148 | 0.259693 | 0.069326 | 0        | 0.16788   |
| Mus_musc Mus_musc | 0        | 0.392648 | 0.413585 | 0.191484 | 0.309801 | 0.328934  |
| Mus_musc Mus_musc | 0        | 0.177888 | 0.366954 | 0.180411 | 0.476301 | 0         |
| ENSMUSG Rnf224    | 0        | 0        | 0        | 0        | 0        | 0         |
| ENSMUSG Gm14435   | 0.781935 | 0.664234 | 0.897944 | 0.652316 | 0.925584 | 1.483028  |
| Mus_musc Mus_musc | 0        | 0.154136 | 0.038971 | 0        | 0.104531 | 0         |
| ENSMUSG Ccdc159   | 1.660668 | 1.300202 | 1.11403  | 1.316625 | 1.102852 | 1.13588   |
| ENSMUSG Fbxo38    | 15.18548 | 15.05852 | 15.02907 | 13.82006 | 14.59229 | 14.148096 |
| ENSMUSG Abhd14a   | 3.337664 | 5.074245 | 3.552697 | 3.210975 | 3.255232 | 3.700048  |
| ENSMUSG Zfand4    | 0.854967 | 0.933137 | 0.981598 | 1.245174 | 1.167703 | 1.583685  |
| ENSMUSG Sprr2d    | 0        | 0        | 0        | 0        | 0        | 0         |
| ENSMUSG Bag2      | 2.269216 | 2.795403 | 2.1137   | 2.623808 | 2.69921  | 2.291237  |
| ENSMUSG Sgsm1     | 2.128525 | 1.708034 | 1.775886 | 2.004554 | 2.264434 | 2.57739   |
| ENSMUSG Olfr631   | 0        | 0        | 0        | 0        | 0        | 0         |
| ENSMUSG Med26     | 4.54563  | 4.102248 | 4.132425 | 3.407976 | 4.752588 | 4.596237  |
| ENSMUSG Zfp949    | 4.22213  | 4.249816 | 4.028757 | 3.820438 | 3.179634 | 3.661949  |
| ENSMUSG Nt5e      | 29.05966 | 19.36854 | 25.36302 | 18.13961 | 18.26886 | 20.081465 |
| ENSMUSG Syncrip   | 23.3536  | 26.74369 | 25.3526  | 24.1281  | 26.98991 | 24.657632 |
| ENSMUSG Snx14     | 16.1481  | 14.63499 | 13.7329  | 13.40968 | 14.09522 | 13.18708  |
| ENSMUSG Magix     | 4.737075 | 6.9585   | 4.022682 | 3.670099 | 4.568328 | 3.355017  |
| ENSMUSG Mndal     | 17.37097 | 14.86473 | 21.43044 | 20.32003 | 11.57911 | 12.71978  |
| ENSMUSG Gm14692   | 0        | 0        | 0        | 0        | 0        | 0         |

|                    |          |          |          |          |          |           |
|--------------------|----------|----------|----------|----------|----------|-----------|
| ENSMUSG Syp        | 2.39292  | 2.569508 | 2.51396  | 1.691133 | 2.249171 | 1.577277  |
| ENSMUSG Afap1      | 6.461556 | 7.025571 | 6.380978 | 5.584911 | 5.763877 | 6.20907   |
| ENSMUSG Gm1140     | 0        | 0        | 0        | 0        | 0        | 0         |
| ENSMUSG Gm6760     | 0        | 0        | 0        | 0        | 0        | 0         |
| ENSMUSG 2900011O   | 0        | 0        | 0        | 0.020207 | 0.04679  | 0.105172  |
| ENSMUSG Nfam1      | 5.86746  | 5.859867 | 6.887521 | 6.918588 | 6.805858 | 7.939508  |
| ENSMUSG Hspb8      | 19.98357 | 23.60562 | 23.45422 | 12.58096 | 11.69197 | 12.918799 |
| ENSMUSG Disp3      | 0        | 0.015162 | 0.067101 | 0.03546  | 0        | 0         |
| ENSMUSG Zfp729b    | 3.673208 | 3.575667 | 3.037647 | 3.156954 | 3.157649 | 3.063137  |
| ENSMUSG Sox5       | 1.995212 | 2.013501 | 1.717855 | 0.9751   | 1.103661 | 1.190394  |
| ENSMUSG Defb19     | 0        | 0        | 0        | 0        | 0        | 0         |
| ENSMUSG Pih1d2     | 2.82273  | 3.246859 | 1.234572 | 3.517975 | 3.26698  | 2.866994  |
| ENSMUSG BC048562   | 0        | 0        | 0        | 0        | 0        | 0         |
| ENSMUSG Tmem150c   | 0.69557  | 0.857765 | 0.615631 | 0.822514 | 0.755729 | 0.782075  |
| ENSMUSG C330018D   | 3.228689 | 3.663344 | 2.986892 | 4.175239 | 3.719097 | 3.856414  |
| ENSMUSG Megf10     | 0.101848 | 0.063416 | 0.096047 | 0.123229 | 0.04594  | 0.113615  |
| ENSMUSG Lmnb1      | 5.898883 | 5.864919 | 6.388764 | 8.263901 | 9.155149 | 11.954614 |
| ENSMUSG Dlat       | 11.63465 | 13.15968 | 10.92282 | 10.57376 | 10.42028 | 10.849544 |
| ENSMUSG Prrc1      | 11.7203  | 10.98538 | 11.82157 | 11.78515 | 11.88551 | 12.443524 |
| Mus_musc Mus_musc  | 0        | 0        | 0        | 0.174016 | 0        | 0         |
| Mus_musc Mus_musc  | 0        | 0        | 0        | 0.474468 | 0        | 0.215591  |
| Mus_musc Mus_musc  | 0        | 0.167514 | 0        | 0        | 0        | 0         |
| Mus_musc Mus_musc  | 0.311316 | 0.342101 | 0.077296 | 0.260203 | 0        | 0.284967  |
| Mus_musc Mus_musc  | 1.168042 | 0.915215 | 0.797307 | 0.671913 | 0.62815  | 0.707511  |
| ENSMUSG Olfr1233   | 0        | 0        | 0        | 0        | 0        | 0         |
| ENSMUSG Olfr1234   | 0        | 0        | 0        | 0        | 0        | 0         |
| ENSMUSG Olfr1231   | 0        | 0        | 0        | 0        | 0        | 0         |
| ENSMUSG Olfr1232   | 0        | 0        | 0        | 0        | 0        | 0         |
| ENSMUSG Olfr1229   | 0        | 0        | 0        | 0        | 0        | 0         |
| ENSMUSG Olfr1230   | 0        | 0        | 0        | 0        | 0        | 0         |
| ENSMUSG Olfr1226   | 0        | 0        | 0        | 0        | 0        | 0         |
| ENSMUSG Olfr1224-p | 0        | 0        | 0        | 0        | 0        | 0         |
| ENSMUSG Dtnbp1     | 17.19494 | 18.0266  | 20.01578 | 19.82605 | 21.11171 | 24.717993 |
| ENSMUSG Card11     | 7.274898 | 7.165011 | 7.241878 | 6.882274 | 6.185689 | 7.422051  |
| ENSMUSG Whrn       | 1.109542 | 1.656643 | 1.443659 | 2.249273 | 1.484742 | 2.377574  |
| ENSMUSG Wipi1      | 12.16003 | 11.39565 | 10.70146 | 13.85948 | 15.27229 | 13.440397 |
| ENSMUSG Git2       | 33.72597 | 30.70032 | 29.78588 | 25.25256 | 26.05485 | 25.164729 |
| ENSMUSG Lman1      | 30.62873 | 29.48967 | 30.50451 | 37.03793 | 38.4968  | 37.39498  |
| ENSMUSG Scgb2b2    | 0        | 0        | 0        | 0        | 0        | 0         |
| ENSMUSG Olfr409-ps | 0        | 0        | 0        | 0        | 0        | 0         |
| ENSMUSG Inhbe      | 0        | 0        | 0        | 0        | 0        | 0.010411  |
| ENSMUSG Dlgap2     | 0        | 0        | 0        | 0        | 0.065796 | 0         |
| ENSMUSG Rnf152     | 0.194054 | 0.255722 | 0.169672 | 0.207231 | 0.22422  | 0.24661   |
| ENSMUSG Adamts12   | 0.239034 | 0.193844 | 0.226948 | 0.672353 | 0.46622  | 0.559622  |
| ENSMUSG Ctsll3     | 0        | 0        | 0        | 0        | 0        | 0         |
| ENSMUSG Olfr77     | 0        | 0.031809 | 0.042965 | 0.043427 | 0        | 0.041298  |
| ENSMUSG Fam71e1    | 0.900325 | 0.849573 | 1.091003 | 1.291689 | 1.088558 | 0.524832  |
| ENSMUSG Sv2c       | 0.094129 | 0.132013 | 0.040336 | 0.071224 | 0.053191 | 0.146361  |
| ENSMUSG Nbeal2     | 9.135538 | 8.724347 | 10.48932 | 9.628503 | 8.367906 | 9.559442  |
| ENSMUSG 4931428FC  | 0.727663 | 0.887086 | 0.625976 | 1.167282 | 0.962182 | 1.013153  |
| ENSMUSG Fmr1       | 12.86343 | 15.59199 | 13.32717 | 11.89316 | 11.35632 | 11.943838 |
| ENSMUSG Adamtsl1   | 2.096608 | 2.876492 | 2.014933 | 2.12719  | 1.614531 | 1.963437  |
| ENSMUSG Hddc2      | 4.142828 | 2.451953 | 2.878019 | 4.430212 | 3.285686 | 4.599719  |
| Mus_musc Mus_musc  | 1.227378 | 1.08485  | 0.571562 | 0.957254 | 0.822226 | 0.625255  |
| Mus_musc Mus_musc  | 0        | 0        | 0        | 0        | 0.047057 | 0         |
| Mus_musc Mus_musc  | 0.27204  | 0.04812  | 0.157539 | 0.068615 | 0.282418 | 0.150804  |
| Mus_musc Mus_musc  | 0        | 0        | 0        | 0        | 0.04798  | 0         |
| Mus_musc Mus_musc  | 0.537565 | 0.314499 | 0.48219  | 0.330667 | 0.653851 | 0.61642   |
| Mus_musc Mus_musc  | 0        | 0        | 0        | 0        | 0.140992 | 0.112238  |
| Mus_musc Mus_musc  | 0        | 0        | 0        | 0.174016 | 0        | 0         |
| ENSMUSG Phex       | 0.502961 | 0.48934  | 0.29619  | 0.863244 | 0.482268 | 0.51847   |
| ENSMUSG Tead1      | 29.10734 | 32.5491  | 24.22392 | 16.18553 | 18.9157  | 16.077171 |
| ENSMUSG Itgb2      | 50.24309 | 42.18738 | 61.64397 | 134.1458 | 124.7286 | 148.77163 |
| Mus_musc Mus_musc  | 0        | 0.158921 | 0        | 0        | 0        | 0         |

|          |           |          |          |          |          |          |           |
|----------|-----------|----------|----------|----------|----------|----------|-----------|
| Mus_musc | Mus_musc  | 0.553455 | 0.979573 | 0.70064  | 0.500025 | 0.259537 | 0.252547  |
| Mus_musc | Mus_musc  | 0.190492 | 0.25197  | 0.428947 | 0        | 0.337164 | 0.261964  |
| Mus_musc | Mus_musc  | 0        | 0        | 0.234717 | 0.29013  | 0        | 0         |
| Mus_musc | Mus_musc  | 0.361824 | 0.254086 | 0.258161 | 0.41257  | 0        | 0         |
| Mus_musc | Mus_musc  | 0.418517 | 0.662863 | 0.311722 | 0.237845 | 0.295234 | 0.283724  |
| Mus_musc | Mus_musc  | 0.308606 | 0.608015 | 0        | 0        | 0.074406 | 0         |
| ENSMUSG  | Olf1021-1 | 0        | 0        | 0        | 0        | 0        | 0         |
| ENSMUSG  | Gm28038   | 0        | 0        | 0        | 0        | 0        | 0         |
| Mus_musc | Mus_musc  | 10.66549 | 11.8674  | 11.2859  | 4.976079 | 5.81673  | 3.707014  |
| Mus_musc | Mus_musc  | 0        | 0        | 0.337872 | 0        | 0        | 0         |
| Mus_musc | Mus_musc  | 0        | 0        | 0.179537 | 0.562734 | 0.270402 | 0         |
| Mus_musc | Mus_musc  | 0.470659 | 0.544267 | 0.331328 | 0.548099 | 0.539654 | 0.279242  |
| Mus_musc | Mus_musc  | 0        | 0        | 0        | 0        | 0.373385 | 0         |
| Mus_musc | Mus_musc  | 1.008439 | 0.642017 | 0.833274 | 1.153651 | 0.861579 | 1.065457  |
| ENSMUSG  | Scn3a     | 1.735545 | 1.444425 | 1.352236 | 1.546746 | 1.354653 | 1.328634  |
| ENSMUSG  | 5730455P1 | 5.041092 | 4.79033  | 4.221702 | 3.941329 | 4.239967 | 3.779215  |
| ENSMUSG  | Gm12569   | 0        | 0        | 0        | 0        | 0        | 0         |
| ENSMUSG  | Olf954    | 0        | 0        | 0        | 0        | 0        | 0         |
| ENSMUSG  | Gm20916   | 0        | 0        | 0        | 0        | 0        | 0         |
| ENSMUSG  | Olf1307   | 0        | 0        | 0        | 0        | 0        | 0         |
| ENSMUSG  | Smim20    | 13.03408 | 11.53008 | 10.76722 | 14.42586 | 14.72006 | 16.601541 |
| ENSMUSG  | Obscn     | 0.097442 | 0.540206 | 0.073991 | 0.189451 | 0.230061 | 0.189701  |
| ENSMUSG  | Gm8677    | 0        | 0        | 0        | 0        | 0        | 0         |
| Mus_musc | Mus_musc  | 1.763683 | 1.989635 | 1.775274 | 1.897124 | 1.606058 | 1.449896  |
| Mus_musc | Mus_musc  | 0        | 0.290248 | 0        | 0        | 0.291469 | 0         |
| Mus_musc | Mus_musc  | 0.487332 | 0.464084 | 0.434678 | 1.193347 | 0.621609 | 0         |
| ENSMUSG  | Gm21677   | 0        | 0        | 0.012863 | 0        | 0        | 0         |
| ENSMUSG  | Gm379     | 0.21577  | 0.070378 | 0.225248 | 0.169313 | 0.296017 | 0.347009  |
| ENSMUSG  | Gm8660    | 0        | 0        | 0        | 0        | 0        | 0         |
| ENSMUSG  | Zfp853    | 0.663292 | 0.737492 | 0.664931 | 0.391023 | 0.443106 | 0.417638  |
| Mus_musc | Mus_musc  | 0.444842 | 0.808916 | 0.375565 | 1.147442 | 0.746525 | 0.791149  |
| Mus_musc | Mus_musc  | 0.480273 | 0.26922  | 0        | 0.265097 | 0        | 0         |
| ENSMUSG  | Mapkapk2  | 51.97674 | 53.31862 | 57.22596 | 49.64358 | 46.68627 | 50.833803 |
| ENSMUSG  | Il10      | 0        | 0        | 0.117224 | 0.488972 | 0.340607 | 0.318459  |
| Mus_musc | Mus_musc  | 0        | 0        | 0        | 0.196616 | 0.421444 | 0.407597  |
| Mus_musc | Mus_musc  | 0.331389 | 0.095248 | 0.162355 | 0.287469 | 0.18858  | 0.263349  |
| ENSMUSG  | Il19      | 0        | 0        | 0        | 0        | 0.095402 | 0         |
| Mus_musc | Mus_musc  | 3.117811 | 3.159157 | 2.972666 | 2.449854 | 4.630195 | 4.559442  |
| Mus_musc | Mus_musc  | 0        | 0        | 0        | 0        | 0        | 0.152803  |
| Mus_musc | Mus_musc  | 0.458424 | 0        | 0        | 0.123202 | 0        | 0         |
| Mus_musc | Mus_musc  | 0        | 0        | 0        | 0        | 0        | 0         |
| Mus_musc | Mus_musc  | 0        | 0        | 0        | 0        | 0        | 0         |
| ENSMUSG  | Cyp2j12   | 0        | 0        | 0        | 0        | 0        | 0         |
| ENSMUSG  | Zfp472    | 3.542238 | 2.808742 | 3.711494 | 3.029536 | 3.225786 | 3.032794  |
| ENSMUSG  | 4930442H  | 0.061544 | 0.080239 | 0        | 0.17422  | 0        | 0         |
| ENSMUSG  | Rpia      | 8.39531  | 10.35749 | 9.579961 | 14.41845 | 13.0104  | 13.595851 |
| ENSMUSG  | Pate1     | 0        | 0        | 0        | 0        | 0        | 0         |
| ENSMUSG  | Krtap11-1 | 0        | 0        | 0        | 0        | 0        | 0         |
| ENSMUSG  | Hoxc9     | 0        | 0        | 0        | 0.02199  | 0        | 0         |
| ENSMUSG  | Acaa1a    | 40.86499 | 41.85163 | 35.78675 | 40.82452 | 42.23059 | 46.33469  |
| ENSMUSG  | Gm28035   | 0.33201  | 1.690859 | 2.78616  | 1.032694 | 1.202875 | 1.250718  |
| ENSMUSG  | Frmd7     | 0.05324  | 0        | 0.023197 | 0        | 0        | 0         |
| ENSMUSG  | 0610012G1 | 11.17792 | 6.33832  | 6.431148 | 6.415356 | 12.2704  | 12.028191 |
| ENSMUSG  | Gm20890   | 0        | 0        | 0        | 0        | 0        | 0         |
| ENSMUSG  | Al593442  | 0.045268 | 0.045417 | 0.014708 | 0.057167 | 0.055108 | 0.008797  |
| ENSMUSG  | Foxd1     | 0        | 0        | 0        | 0.009312 | 0.023373 | 0.001637  |
| ENSMUSG  | Scgb2b18  | 0        | 0        | 0        | 0        | 0        | 0         |
| ENSMUSG  | Spats2    | 5.398403 | 6.132488 | 5.606869 | 5.666996 | 5.627233 | 5.536841  |
| ENSMUSG  | Prss58    | 0        | 0        | 0        | 0        | 0        | 0         |
| ENSMUSG  | Vmn2r26   | 0        | 0        | 0        | 0        | 0.016889 | 0.004989  |
| ENSMUSG  | Ldah      | 12.36766 | 14.59598 | 13.39821 | 13.30442 | 13.23909 | 14.174637 |
| ENSMUSG  | Tnfsf12   | 22.92068 | 20.54185 | 25.44192 | 18.82312 | 19.17337 | 20.068103 |
| ENSMUSG  | E030030I0 | 0        | 0        | 0.070776 | 0.113705 | 0.330335 | 0         |
| ENSMUSG  | Gdf7      | 0        | 0.026242 | 0.035615 | 0.019199 | 0.071896 | 0.034041  |

|                    |          |          |          |          |          |           |
|--------------------|----------|----------|----------|----------|----------|-----------|
| ENSMUSG Gpr160     | 1.431177 | 1.612665 | 1.930831 | 4.35088  | 4.156389 | 4.394361  |
| ENSMUSG Prrt1      | 0.870873 | 0.793659 | 1.004299 | 1.082165 | 0.775254 | 0.618353  |
| ENSMUSG Olfr29-ps1 | 0        | 0        | 0        | 0        | 0        | 0         |
| ENSMUSG Dock3      | 0.013569 | 0        | 0.005592 | 0        | 0.04091  | 0.026725  |
| ENSMUSG Raly1      | 0        | 0.03446  | 0.0279   | 0        | 0.094692 | 0.018839  |
| ENSMUSG Cplx3      | 0        | 0        | 0.013945 | 0.036763 | 0        | 0         |
| ENSMUSG Wdr34      | 5.809643 | 7.163558 | 4.820175 | 6.526854 | 5.654545 | 6.5824    |
| ENSMUSG Plekhg5    | 12.98213 | 10.87133 | 12.09963 | 8.541867 | 7.545097 | 7.674483  |
| ENSMUSG Slc7a12    | 0        | 0        | 0        | 0        | 0        | 0         |
| Mus_musc Mus_musc  | 0.273989 | 0.329903 | 0.603903 | 0.51959  | 0.122176 | 0.19847   |
| ENSMUSG Olfr111    | 0.031706 | 0        | 0        | 0.680405 | 0.322811 | 0.49153   |
| ENSMUSG Gm340      | 1.650633 | 1.509036 | 1.265413 | 1.571559 | 1.970358 | 1.8673    |
| Mus_musc Mus_musc  | 1.028143 | 1.034084 | 0.555569 | 0.740519 | 0.528599 | 0.881194  |
| Mus_musc Mus_musc  | 0.270237 | 0.045983 | 0.136262 | 0.181495 | 0.158341 | 0.14566   |
| ENSMUSG Leng1      | 6.493639 | 6.393453 | 7.160735 | 5.451984 | 5.297546 | 5.140786  |
| ENSMUSG Kcnk5      | 2.594357 | 3.285168 | 3.637954 | 2.750143 | 2.578523 | 3.068558  |
| ENSMUSG Guca2a     | 0        | 0.284719 | 0.170643 | 0.997517 | 0.537448 | 2.377057  |
| ENSMUSG Gp6        | 0.290174 | 0.224193 | 0.263727 | 0.108981 | 0.118502 | 0.071271  |
| ENSMUSG Eps8       | 9.314681 | 9.881859 | 8.075458 | 15.87236 | 16.16426 | 18.610489 |
| ENSMUSG Unc93a     | 0.024637 | 0        | 0        | 0.026717 | 0        | 0         |
| Mus_musc Mus_musc  | 1.584508 | 1.103344 | 3.333431 | 1.843984 | 1.15522  | 1.107484  |
| ENSMUSG Parp3      | 13.4716  | 15.57398 | 18.45251 | 14.34746 | 14.32958 | 15.470983 |
| ENSMUSG Gm4214     | 0        | 0        | 0        | 0        | 0        | 0         |
| ENSMUSG Gipc1      | 34.37045 | 31.40061 | 32.07961 | 37.03783 | 37.08992 | 39.659504 |
| ENSMUSG Ddx39b     | 77.00225 | 64.47952 | 74.26706 | 55.09509 | 53.28653 | 53.506802 |
| ENSMUSG Vmn1r16    | 0        | 0        | 0        | 0        | 0        | 0         |
| ENSMUSG Vmn1r217   | 0        | 0        | 0        | 0        | 0        | 0         |
| ENSMUSG Vmn1r19    | 0        | 0        | 0        | 0        | 0        | 0         |
| ENSMUSG AC140267   | 0.035111 | 0.007561 | 0.006806 | 0.030365 | 0.007475 | 0.079533  |
| ENSMUSG Srp54b     | 16.83573 | 15.10583 | 15.85685 | 18.89948 | 16.33924 | 16.839801 |
| ENSMUSG Ank1       | 0.467866 | 1.681117 | 0.537807 | 0.628895 | 0.865809 | 0.446913  |
| ENSMUSG Ndufaf6    | 2.37646  | 2.248394 | 2.148315 | 2.11264  | 1.839834 | 2.170827  |
| ENSMUSG Pparg      | 7.145613 | 6.022412 | 5.955275 | 5.514006 | 5.871791 | 6.075838  |
| ENSMUSG Kat6a      | 23.69504 | 25.61874 | 21.325   | 18.31467 | 19.79705 | 19.594988 |
| Mus_musc Mus_musc  | 0.030999 | 0        | 0        | 0        | 0        | 0         |
| ENSMUSG Gins4      | 12.87528 | 15.35126 | 14.6513  | 13.67323 | 14.85014 | 13.864828 |
| ENSMUSG Gpat4      | 12.7141  | 13.00066 | 12.8057  | 10.94373 | 11.74675 | 11.570972 |
| ENSMUSG Sugct      | 0.547855 | 1.094818 | 0.52363  | 1.214221 | 1.306202 | 0.859118  |
| ENSMUSG Hoxc12     | 0        | 0        | 0        | 0        | 0        | 0         |
| ENSMUSG Sfrp1      | 2.938142 | 2.753319 | 1.731209 | 3.420818 | 4.488623 | 5.390354  |
| Mus_musc Mus_musc  | 0.345108 | 0.818299 | 0.136734 | 0.124006 | 0.216439 | 0.206887  |
| ENSMUSG Tgjf2      | 4.216308 | 3.820339 | 3.951569 | 3.453327 | 3.211173 | 3.899153  |
| ENSMUSG Fmr1nb     | 0        | 0        | 0        | 0        | 0        | 0         |
| ENSMUSG Rftn2      | 7.6558   | 8.679901 | 7.026395 | 5.725529 | 5.686262 | 5.769946  |
| ENSMUSG Boll       | 0.052295 | 0.189786 | 0        | 0.028727 | 0.057106 | 0         |
| ENSMUSG Gm10352    | 0        | 0        | 0        | 0        | 0        | 0         |
| ENSMUSG Olfr457    | 0.022271 | 0.078136 | 0.087767 | 0        | 0.019076 | 0.025094  |
| Mus_musc Mus_musc  | 0        | 0        | 0        | 0.174016 | 0        | 0         |
| ENSMUSG Rtn1       | 3.998784 | 3.744865 | 3.003753 | 2.925936 | 2.64015  | 2.825983  |
| ENSMUSG Ccdc175    | 0        | 0.007661 | 0        | 0        | 0        | 0         |
| ENSMUSG Serpina1f  | 0        | 0        | 0        | 0        | 0        | 0         |
| ENSMUSG Drosha     | 12.33451 | 12.45828 | 10.61133 | 10.24814 | 10.26693 | 10.401859 |
| ENSMUSG Psmb5      | 30.01817 | 35.21822 | 33.24356 | 35.54643 | 36.83995 | 34.757036 |
| ENSMUSG Pabpn1     | 30.35411 | 29.18448 | 40.23798 | 32.42315 | 30.3189  | 26.254216 |
| ENSMUSG 6030458C:  | 6.99645  | 8.194035 | 9.134891 | 8.025239 | 7.141968 | 8.052544  |
| ENSMUSG Pdzd2      | 92.20319 | 94.19688 | 78.95426 | 58.33136 | 63.888   | 49.180658 |
| ENSMUSG Slc22a17   | 5.87578  | 4.489051 | 4.794071 | 4.858437 | 4.263341 | 3.639103  |
| ENSMUSG Gm9573     | 0        | 0        | 0        | 0        | 0        | 0         |
| Mus_musc Mus_musc  | 0.624866 | 0.766608 | 0.339494 | 0.719481 | 0.275707 | 0.537234  |
| Mus_musc Mus_musc  | 1.23663  | 0.914869 | 0.760445 | 1.209008 | 0.377202 | 0.702567  |
| Mus_musc Mus_musc  | 0.91389  | 1.278325 | 0.5886   | 0.536597 | 0.335891 | 0.365202  |
| Mus_musc Mus_musc  | 0.31918  | 0.33061  | 0.361227 | 0.337875 | 0.26367  | 0.339777  |
| Mus_musc Mus_musc  | 0        | 0.053061 | 0.301404 | 0        | 0        | 0.107604  |
| Mus_musc Mus_musc  | 0        | 0        | 0        | 0        | 0.254189 | 0         |



|                    |          |          |          |          |          |           |
|--------------------|----------|----------|----------|----------|----------|-----------|
| ENSMUSG St6galnac2 | 1.3282   | 1.170852 | 1.93871  | 1.202855 | 0.94213  | 1.151304  |
| ENSMUSG Olfr484    | 0        | 0        | 0        | 0        | 0        | 0         |
| ENSMUSG Gm10273    | 0.244921 | 5.792395 | 2.9255   | 1.412522 | 1.990623 | 0.526549  |
| ENSMUSG Zfp945     | 4.329035 | 4.654615 | 4.293958 | 4.675901 | 3.610587 | 3.471337  |
| ENSMUSG Hyal5      | 0        | 0        | 0.068475 | 0.050439 | 0.054114 | 0.062018  |
| ENSMUSG Hyal6      | 0        | 0        | 0        | 0        | 0        | 0         |
| ENSMUSG Ing3       | 6.293948 | 6.611869 | 7.965388 | 5.097253 | 5.22678  | 5.777284  |
| ENSMUSG Wnt16      | 0.012306 | 0.036988 | 0        | 0        | 0.174907 | 0         |
| ENSMUSG Fam3c      | 24.99691 | 24.2785  | 23.96447 | 21.64008 | 20.09034 | 21.371345 |
| ENSMUSG Aut2       | 3.486573 | 2.488899 | 1.849729 | 1.751365 | 1.696667 | 1.275578  |
| ENSMUSG Limk1      | 7.571328 | 7.678793 | 9.881697 | 9.181132 | 10.26422 | 10.09455  |
| ENSMUSG Eln        | 42.66411 | 31.58182 | 36.82903 | 48.54892 | 43.98816 | 59.664989 |
| ENSMUSG Pot1a      | 5.104538 | 4.595537 | 4.550295 | 4.628151 | 4.984689 | 4.472042  |
| ENSMUSG Cldn16     | 0        | 0        | 0        | 0        | 0        | 0         |
| ENSMUSG Snrk       | 74.08393 | 73.7766  | 53.19212 | 38.7325  | 39.06029 | 37.419926 |
| ENSMUSG Notch3     | 21.0974  | 18.79437 | 24.40644 | 13.79908 | 14.21393 | 13.044098 |
| ENSMUSG Cd84       | 12.86269 | 12.00831 | 13.72692 | 34.37734 | 34.21249 | 42.427065 |
| ENSMUSG Tmem181a   | 3.292804 | 3.697132 | 4.109533 | 3.699611 | 3.79355  | 3.450158  |
| ENSMUSG Stox2      | 2.186767 | 2.736283 | 2.237034 | 2.366768 | 2.495236 | 2.174752  |
| ENSMUSG Tmprss11a  | 0        | 0        | 0        | 0        | 0        | 0         |
| ENSMUSG Serpina1e  | 0.465364 | 0.130502 | 0.498316 | 0.230806 | 0.111779 | 0.23377   |
| ENSMUSG Hormad1    | 0        | 0        | 0        | 0        | 0        | 0         |
| ENSMUSG Ecm1       | 37.08051 | 35.84784 | 41.76654 | 37.93929 | 34.12859 | 37.404095 |
| ENSMUSG Pmel       | 0.3215   | 0.494734 | 0.424496 | 0.484846 | 0.526579 | 0.540061  |
| ENSMUSG Cdk2       | 8.087346 | 7.38609  | 8.378368 | 9.011439 | 9.188183 | 9.388076  |
| ENSMUSG Pias3      | 14.09663 | 14.04634 | 14.45852 | 11.28947 | 11.25646 | 11.125513 |
| ENSMUSG Nudt17     | 1.105711 | 0.994847 | 0.603225 | 0.902913 | 0.386122 | 0.786806  |
| ENSMUSG Cd63       | 99.132   | 103.8778 | 116.0131 | 184.5507 | 190.0765 | 213.66935 |
| ENSMUSG Rdh5       | 2.416682 | 2.600889 | 2.708009 | 2.774558 | 2.730064 | 2.738128  |
| ENSMUSG Dgka       | 24.96513 | 20.10907 | 24.50076 | 20.8844  | 19.81809 | 21.285532 |
| ENSMUSG Polr3gl    | 19.00459 | 17.98679 | 21.53811 | 15.21672 | 14.82643 | 13.88305  |
| ENSMUSG Tars2      | 8.131216 | 8.796448 | 8.070534 | 8.204848 | 8.184588 | 7.806731  |
| ENSMUSG Rprd2      | 7.561674 | 6.648585 | 6.401811 | 6.022292 | 6.075441 | 5.557873  |
| Mus_musc Mus_musc  | 0        | 0        | 0        | 0        | 0        | 0         |
| Mus_musc Mus_musc  | 0        | 0        | 0        | 0        | 0.186692 | 0         |
| Mus_musc Mus_musc  | 0.318069 | 0.24171  | 0.309408 | 0.280364 | 0.268442 | 0.236874  |
| Mus_musc Mus_musc  | 0        | 0        | 0        | 0.071453 | 0        | 0         |
| Mus_musc Mus_musc  | 0        | 0        | 0        | 0        | 0        | 0         |
| Mus_musc Mus_musc  | 0        | 0        | 0        | 0        | 0.186692 | 0         |
| ENSMUSG Actg1      | 944.7814 | 789.608  | 926.0333 | 805.6604 | 712.5862 | 908.53398 |
| ENSMUSG Ces2f      | 0        | 0        | 0        | 0        | 0        | 0         |
| ENSMUSG 4833420G   | 12.4206  | 11.89516 | 12.91261 | 12.95389 | 12.87185 | 12.115048 |
| ENSMUSG Gm38431    | 2.749293 | 10.96658 | 2.399166 | 18.07364 | 1.365369 | 1.943704  |
| ENSMUSG Ccdc137    | 7.706946 | 9.830745 | 8.280487 | 7.116388 | 7.146661 | 7.550675  |
| ENSMUSG Rpp38      | 1.02515  | 1.617137 | 2.029828 | 1.748179 | 2.274709 | 1.869084  |
| ENSMUSG Cd177      | 0.626448 | 1.76165  | 0.967679 | 26.07824 | 21.82889 | 15.948165 |
| ENSMUSG Opa3       | 11.24435 | 12.71225 | 11.78525 | 11.78568 | 11.97059 | 13.635219 |
| ENSMUSG Hbb-bh1    | 0        | 0        | 0        | 0        | 0        | 0         |
| ENSMUSG Olfr748    | 0        | 0        | 0        | 0        | 0        | 0         |
| ENSMUSG Hist1h2aa  | 0        | 0        | 0        | 0        | 0        | 0         |
| ENSMUSG 2610044O   | 6.997873 | 6.866962 | 6.560354 | 5.645453 | 5.731554 | 5.320377  |
| ENSMUSG Rspo3      | 0.443657 | 0.524852 | 0.4722   | 0.54777  | 0.437592 | 0.223053  |
| ENSMUSG Echdc1     | 7.185323 | 7.979317 | 6.440424 | 8.320712 | 6.943051 | 5.802992  |
| ENSMUSG Mgat4c     | 0        | 0.01304  | 0        | 0.063749 | 0.020408 | 0.024834  |
| ENSMUSG Ptprk      | 24.12406 | 21.56574 | 19.96133 | 15.63005 | 12.82775 | 14.930966 |
| ENSMUSG Daw1       | 0.988902 | 0.840211 | 0.487879 | 0.746191 | 0.566409 | 0.884581  |
| ENSMUSG Gpr21      | 0.285139 | 0.202448 | 0.236986 | 0.182767 | 0.214562 | 0.187206  |
| ENSMUSG Cdh22      | 0.452251 | 0.265685 | 0.109384 | 0.215375 | 0.32013  | 0.32658   |
| ENSMUSG Spag7      | 30.77048 | 27.89782 | 31.9113  | 27.55814 | 28.23404 | 28.967539 |
| ENSMUSG Psm6       | 78.72603 | 87.26286 | 82.37036 | 89.18362 | 85.36276 | 94.438225 |
| ENSMUSG Rtn3       | 86.27313 | 85.11289 | 87.12985 | 73.17427 | 73.78119 | 73.116642 |
| ENSMUSG At13       | 28.46323 | 29.7989  | 25.43939 | 23.83306 | 24.08962 | 23.715288 |
| ENSMUSG Cxcl14     | 23.83742 | 15.02761 | 13.12931 | 9.638752 | 10.60355 | 9.220906  |
| ENSMUSG Slc25a48   | 0.22041  | 0.024697 | 0        | 0        | 0        | 0.016377  |

|                    |          |          |          |          |          |           |
|--------------------|----------|----------|----------|----------|----------|-----------|
| ENSMUSG Cts3       | 0        | 0        | 0        | 0        | 0        | 0         |
| ENSMUSG Ctsm       | 0        | 0        | 0        | 0        | 0        | 0         |
| ENSMUSG Ddx46      | 14.70184 | 13.67051 | 13.51353 | 13.05768 | 11.74787 | 12.841571 |
| ENSMUSG Caml       | 16.87324 | 15.48447 | 16.93106 | 15.98896 | 15.68256 | 15.110469 |
| ENSMUSG Cemip2     | 48.67762 | 47.6685  | 40.83452 | 29.83004 | 35.28741 | 32.224968 |
| ENSMUSG B4galt7    | 6.391816 | 5.946755 | 6.312986 | 6.883944 | 7.892198 | 8.138465  |
| ENSMUSG Slc22a19   | 0.043874 | 0        | 0        | 0        | 0.02103  | 0         |
| ENSMUSG Abt1       | 3.634501 | 4.008301 | 3.695023 | 2.96218  | 2.75941  | 3.140012  |
| Mus_musc Mus_musc  | 0        | 0        | 0        | 0        | 0        | 0         |
| ENSMUSG Olfr391-ps | 0        | 0        | 0        | 0        | 0        | 0         |
| ENSMUSG 9530068E   | 72.6735  | 73.7523  | 73.21755 | 69.69203 | 70.32663 | 73.616528 |
| ENSMUSG Edc4       | 13.23337 | 11.92244 | 12.67893 | 10.47013 | 10.98668 | 11.015268 |
| ENSMUSG Lrrk2      | 20.339   | 21.51662 | 17.31461 | 21.33118 | 23.72845 | 23.447905 |
| ENSMUSG Macrod1    | 6.85495  | 7.011185 | 6.661194 | 6.261619 | 6.39751  | 6.926069  |
| ENSMUSG Cfap298    | 16.98692 | 17.95705 | 15.18504 | 18.98028 | 19.31782 | 18.349377 |
| ENSMUSG Synj1      | 10.45676 | 13.03804 | 10.05524 | 9.902058 | 11.53578 | 11.763463 |
| ENSMUSG Ifnar2     | 28.47405 | 24.94714 | 29.13915 | 32.70886 | 32.69164 | 35.478102 |
| ENSMUSG Prkaca     | 30.55065 | 30.47739 | 29.30664 | 26.35029 | 28.76973 | 30.927267 |
| ENSMUSG Il27ra     | 3.581424 | 2.898772 | 3.593539 | 5.18299  | 4.895838 | 4.725926  |
| ENSMUSG Terb2      | 0        | 0        | 0        | 0        | 0        | 0         |
| ENSMUSG Liltr4b    | 2.383399 | 2.616679 | 3.510932 | 17.39573 | 15.9601  | 19.808752 |
| ENSMUSG Chst1      | 10.4274  | 9.231667 | 11.6393  | 9.541929 | 8.241839 | 7.382363  |
| ENSMUSG Syt13      | 0.007149 | 0.021827 | 0.035126 | 0.167307 | 0.208931 | 0.3027    |
| ENSMUSG Mapk8ip1   | 6.365613 | 6.774803 | 5.984534 | 5.054175 | 5.714807 | 6.147371  |
| ENSMUSG Mrgprb4    | 0        | 0        | 0        | 0        | 0        | 0         |
| ENSMUSG Duoxa2     | 0        | 0.072793 | 0.123413 | 0        | 0        | 0         |
| ENSMUSG Duoxa1     | 0        | 0.02787  | 0        | 1.32212  | 0.873827 | 2.261271  |
| ENSMUSG Sord       | 26.49197 | 26.42166 | 19.21706 | 19.09591 | 18.8422  | 20.043255 |
| ENSMUSG Rfx3       | 2.343898 | 3.237334 | 1.666411 | 2.279525 | 2.411737 | 2.253637  |
| ENSMUSG S100pbp    | 7.890729 | 7.784016 | 8.121994 | 8.380833 | 7.744501 | 8.529498  |
| ENSMUSG Anxa4      | 100.4652 | 99.81724 | 94.37146 | 110.5077 | 122.9326 | 136.77679 |
| ENSMUSG Nfu1       | 14.81569 | 14.80827 | 16.80342 | 15.90081 | 15.59166 | 14.682242 |
| ENSMUSG Gfpt1      | 16.28204 | 18.0747  | 14.92557 | 19.40454 | 20.38014 | 21.540505 |
| ENSMUSG Tgfa       | 6.306675 | 5.852861 | 5.861544 | 3.596803 | 4.506679 | 3.92947   |
| ENSMUSG Pcyox1     | 27.22705 | 27.48944 | 27.3234  | 25.39574 | 27.24708 | 28.605479 |
| ENSMUSG Bbs1       | 3.273115 | 2.92307  | 2.088182 | 2.062517 | 2.295737 | 2.262115  |
| ENSMUSG Zdhhc24    | 6.48172  | 6.654543 | 6.670799 | 6.703773 | 6.985344 | 5.957397  |
| ENSMUSG Angpt1     | 24.70512 | 24.27838 | 25.90891 | 17.17255 | 17.37888 | 13.304315 |
| Mus_musc Mus_musc  | 0        | 0.115891 | 0.208905 | 0.261144 | 0.077553 | 0         |
| ENSMUSG Slc34a3    | 0        | 0        | 0        | 0        | 0        | 0         |
| Mus_musc Mus_musc  | 0        | 0.114092 | 0.109979 | 0.219759 | 0.093764 | 0.199432  |
| ENSMUSG Wdr49      | 0        | 0.230946 | 0        | 0.258684 | 0.172309 | 0.237648  |
| ENSMUSG Btbd19     | 2.120925 | 2.304964 | 2.764347 | 2.517756 | 2.851452 | 2.517724  |
| ENSMUSG Kncn       | 0        | 0        | 0        | 0        | 0.065568 | 0         |
| ENSMUSG Kti12      | 12.95966 | 10.00511 | 11.36584 | 11.4817  | 9.624525 | 10.514597 |
| ENSMUSG Srsf2      | 65.09532 | 53.85655 | 68.55848 | 57.38567 | 45.36197 | 57.526746 |
| ENSMUSG Mks1       | 2.020002 | 1.741305 | 1.442586 | 1.807916 | 2.202992 | 2.442919  |
| ENSMUSG Pomt2      | 5.403004 | 6.106    | 5.875937 | 5.121071 | 4.653298 | 4.762295  |
| ENSMUSG Tspan8     | 92.13857 | 86.95166 | 101.0264 | 59.7766  | 60.97535 | 56.826661 |
| ENSMUSG Svip       | 6.244116 | 5.903985 | 5.109752 | 4.530519 | 4.805509 | 4.640553  |
| ENSMUSG Cyp2d10    | 0        | 0        | 0        | 0        | 0        | 0         |
| ENSMUSG Cds1       | 6.228541 | 7.250379 | 5.933473 | 6.593324 | 5.851049 | 7.212717  |
| ENSMUSG Bmp3       | 10.07149 | 9.172845 | 8.96824  | 7.964016 | 6.297987 | 7.018277  |
| ENSMUSG Prkg2      | 3.49685  | 3.874256 | 4.00055  | 2.812943 | 2.481586 | 2.465253  |
| ENSMUSG Fgf5       | 0        | 0        | 0.040528 | 0.041747 | 0.020976 | 0         |
| ENSMUSG Antxr2     | 15.31474 | 14.42632 | 11.86347 | 12.51673 | 11.71667 | 12.141796 |
| ENSMUSG Olfr810    | 0        | 0        | 0        | 0        | 0        | 0         |
| Mus_musc Mus_musc  | 0        | 0        | 0        | 0        | 0.465338 | 0         |
| Mus_musc Mus_musc  | 0        | 0        | 0.061012 | 0.660416 | 0        | 0         |
| Mus_musc Mus_musc  | 2.263426 | 2.354437 | 1.786616 | 1.192951 | 1.740902 | 1.772053  |
| Mus_musc Mus_musc  | 0        | 0        | 0        | 0        | 0        | 0         |
| Mus_musc Mus_musc  | 0.37412  | 0.30288  | 0.195812 | 0.347673 | 0.593635 | 0.273996  |
| Mus_musc Mus_musc  | 0        | 0        | 0        | 0        | 0.186692 | 0         |
| Mus_musc Mus_musc  | 1.16814  | 0.598739 | 1.171047 | 0.79525  | 0.646949 | 0.698968  |

|                   |          |          |          |          |          |           |
|-------------------|----------|----------|----------|----------|----------|-----------|
| Mus_musc Mus_musc | 0.828782 | 0.728266 | 0.685399 | 0.64032  | 0.591047 | 0.471748  |
| ENSMUSG Scgb2b24  | 0        | 0        | 0        | 0        | 0        | 0         |
| ENSMUSG Gm13078   | 0        | 0        | 0        | 0        | 0        | 0         |
| ENSMUSG Hnrnpa1   | 81.207   | 73.6039  | 72.05337 | 74.85963 | 74.24895 | 73.132686 |
| ENSMUSG Olfr518   | 0        | 0        | 0        | 0        | 0        | 0         |
| ENSMUSG Bex3      | 33.59838 | 33.97214 | 36.18275 | 33.88549 | 31.72845 | 38.175983 |
| Mus_musc Mus_musc | 0.416071 | 0        | 0        | 0        | 0.085118 | 0         |
| Mus_musc Mus_musc | 0        | 0        | 0        | 0        | 0.1702   | 0         |
| Mus_musc Mus_musc | 0        | 0.418698 | 0.572473 | 0.172651 | 0.579744 | 0.553808  |
| ENSMUSG Mid1      | 2.872881 | 2.234096 | 2.249399 | 2.570983 | 3.267874 | 2.10841   |
| ENSMUSG Kih135    | 0.142226 | 0        | 0.158215 | 0.107224 | 0        | 0.165145  |
| ENSMUSG G2e3      | 2.685765 | 3.617729 | 2.57916  | 2.557844 | 2.798577 | 2.972831  |
| ENSMUSG Cops4     | 22.6543  | 21.4748  | 22.92153 | 22.55227 | 24.24811 | 20.8558   |
| ENSMUSG Sgcg      | 0.214484 | 0.784409 | 0.2761   | 0.58936  | 0.332753 | 0.348356  |
| ENSMUSG Wdr38     | 0.40014  | 0.50909  | 0.603956 | 0.825728 | 0.771322 | 1.135326  |
| ENSMUSG Golga7b   | 0        | 0        | 0        | 0        | 0        | 0.038968  |
| ENSMUSG Gtpbp1    | 17.6416  | 16.19093 | 16.68433 | 14.78196 | 15.13772 | 14.989865 |
| ENSMUSG Prh1      | 0        | 0        | 0        | 0        | 0        | 0         |
| ENSMUSG Gatad1    | 19.45085 | 21.37398 | 18.14949 | 16.45539 | 16.75793 | 15.238224 |
| ENSMUSG Mark3     | 25.54223 | 25.14355 | 23.99742 | 20.72045 | 20.4443  | 19.516135 |
| ENSMUSG Slc23a2   | 33.22907 | 35.41809 | 24.15196 | 24.98261 | 26.20765 | 24.8446   |
| ENSMUSG Grin3b    | 0.321597 | 0.178593 | 0.28866  | 0.281903 | 0.182458 | 0.186237  |
| ENSMUSG Zfp995    | 1.588801 | 1.686219 | 1.361264 | 1.594034 | 1.839086 | 1.944786  |
| ENSMUSG Zbtb2     | 10.01453 | 7.933928 | 8.921392 | 6.199792 | 7.198812 | 6.45241   |
| ENSMUSG Fign      | 0.756428 | 0.917335 | 0.589333 | 0.557552 | 0.647186 | 0.518697  |
| ENSMUSG Bola3     | 6.349883 | 6.323439 | 6.608903 | 6.09941  | 5.108239 | 5.241342  |
| ENSMUSG Ai467606  | 12.40881 | 10.69056 | 12.59423 | 13.15488 | 14.13199 | 15.298135 |
| Mus_musc Mus_musc | 0.4421   | 0.913162 | 0.569813 | 0.714451 | 0.162712 | 0.40201   |
| Mus_musc Mus_musc | 0.106961 | 0.236562 | 0.113963 | 0.947056 | 0.760041 | 0.803443  |
| Mus_musc Mus_musc | 0        | 0        | 0        | 0.204337 | 0.144262 | 0         |
| Mus_musc Mus_musc | 1.194356 | 0.812416 | 0.964398 | 1.37462  | 0.929678 | 0.793623  |
| Mus_musc Mus_musc | 0        | 0        | 0        | 0        | 0        | 0.162278  |
| Mus_musc Mus_musc | 0.494805 | 0        | 0.075306 | 0        | 0        | 0         |
| Mus_musc Mus_musc | 0.321561 | 0        | 0        | 0        | 0.081171 | 0         |
| ENSMUSG Zfp965    | 3.805655 | 6.427282 | 4.935531 | 4.950775 | 3.022423 | 3.433032  |
| ENSMUSG Gm4724    | 1.801856 | 0.925836 | 0.548058 | 0.448651 | 0.53133  | 1.28779   |
| ENSMUSG 2210418O  | 0.686268 | 1.047305 | 0.695925 | 1.486287 | 1.109197 | 1.677852  |
| ENSMUSG Mcm3ap    | 9.123887 | 8.487597 | 8.111761 | 7.43644  | 8.582181 | 8.084415  |
| ENSMUSG Gmcl1     | 6.276347 | 7.035305 | 7.504111 | 6.406537 | 6.816196 | 6.867631  |
| ENSMUSG Mxd1      | 11.45271 | 12.41688 | 14.46314 | 10.39599 | 10.43113 | 11.00232  |
| ENSMUSG Ftcd      | 0.010506 | 0        | 0        | 0        | 0        | 0         |
| ENSMUSG Snrnp27   | 28.32835 | 31.22526 | 33.54987 | 29.69869 | 26.85426 | 27.535842 |
| ENSMUSG Zfp968    | 1.157137 | 0.219141 | 1.341619 | 0.881381 | 1.102829 | 0.300926  |
| ENSMUSG Gm4631    | 0.516372 | 0.323269 | 0.140011 | 0.371697 | 0.154437 | 0.187486  |
| Mus_musc Mus_musc | 0        | 0        | 0.112949 | 0        | 0        | 0.318478  |
| Mus_musc Mus_musc | 1.326385 | 1.005708 | 1.058769 | 1.1373   | 0.64391  | 0.856676  |
| ENSMUSG Gypa      | 0.309214 | 0.479544 | 0.983724 | 0.093788 | 0.340047 | 0.140332  |
| Mus_musc Mus_musc | 4.472477 | 5.22532  | 3.250039 | 3.352445 | 3.269188 | 3.351841  |
| ENSMUSG Sltm      | 16.58275 | 16.04979 | 19.11711 | 14.13145 | 13.71117 | 13.961102 |
| ENSMUSG Nedd4     | 128.5681 | 127.0571 | 109.361  | 96.06509 | 100.4576 | 98.070879 |
| ENSMUSG Rnf111    | 9.268507 | 9.556434 | 8.80668  | 9.270819 | 8.981433 | 9.88622   |
| ENSMUSG Rsl24d1   | 18.78417 | 19.12466 | 18.54103 | 16.60503 | 19.27335 | 16.455078 |
| ENSMUSG Ccnb2     | 1.965365 | 1.404708 | 1.278386 | 3.118083 | 4.934177 | 4.456561  |
| ENSMUSG Btdb35f26 | 0        | 0        | 0        | 0        | 0        | 0         |
| ENSMUSG Crocc2    | 0.678345 | 0.521465 | 0.476087 | 1.693164 | 1.58466  | 1.782787  |
| ENSMUSG Gbp2b     | 13.65463 | 14.72007 | 68.15416 | 39.01648 | 13.57947 | 13.980801 |
| ENSMUSG Dnm3      | 2.292494 | 2.28952  | 2.779994 | 2.954995 | 1.766621 | 1.832841  |
| ENSMUSG Kihdc4    | 11.84022 | 9.827756 | 10.91973 | 11.53238 | 11.68462 | 11.92801  |
| ENSMUSG Daam2     | 6.371411 | 6.34957  | 5.030749 | 3.832035 | 3.954356 | 3.813629  |
| ENSMUSG Ube2dnl1  | 0        | 0        | 0        | 0        | 0        | 0         |
| ENSMUSG Plekha1   | 50.96521 | 51.13684 | 53.02433 | 38.96137 | 36.29027 | 36.294181 |
| ENSMUSG Mrps28    | 12.35989 | 12.85438 | 14.1093  | 16.23084 | 14.70769 | 17.619074 |
| ENSMUSG Vmn2r51   | 0        | 0        | 0        | 0        | 0        | 0         |
| ENSMUSG Thada     | 3.145806 | 2.992448 | 2.56668  | 2.757219 | 2.86621  | 2.888416  |

|                   |          |          |          |          |          |           |
|-------------------|----------|----------|----------|----------|----------|-----------|
| ENSMUSG Mnt       | 9.0192   | 8.453778 | 9.464001 | 7.853095 | 8.226828 | 8.689398  |
| ENSMUSG Abcg8     | 0        | 0        | 0.026536 | 0        | 0.031966 | 0         |
| ENSMUSG Adcyap1   | 0.01663  | 0        | 0        | 0        | 0        | 0         |
| ENSMUSG Slc25a46  | 11.70291 | 10.72122 | 11.01397 | 10.6457  | 10.87281 | 11.090814 |
| ENSMUSG Polr2d    | 15.18673 | 16.67699 | 19.06355 | 15.66241 | 14.8396  | 15.711203 |
| ENSMUSG Olfr1250  | 0        | 0        | 0        | 0        | 0        | 0         |
| ENSMUSG Car13     | 2.065033 | 3.034637 | 2.352467 | 4.608778 | 4.9132   | 5.906137  |
| ENSMUSG Kbtbd2    | 18.16411 | 16.97329 | 16.9246  | 12.07097 | 12.44048 | 12.115269 |
| ENSMUSG Plg       | 0.020119 | 0        | 0.018383 | 0.065516 | 0        | 0         |
| ENSMUSG 2610301B  | 8.681971 | 9.1662   | 7.687116 | 8.569073 | 8.645882 | 8.259569  |
| ENSMUSG Olfr727   | 0        | 0        | 0        | 0        | 0        | 0         |
| ENSMUSG Olfr48    | 0        | 0        | 0        | 0        | 0        | 0         |
| ENSMUSG Csn1s2a   | 0        | 0        | 0        | 0        | 0        | 0         |
| ENSMUSG Zfp64     | 9.403811 | 9.626431 | 8.177005 | 8.651384 | 8.404094 | 8.372435  |
| ENSMUSG Ano5      | 0.27846  | 0.317224 | 0.362285 | 0.248279 | 0.160545 | 0.228836  |
| ENSMUSG Slc2a9    | 3.161246 | 2.907116 | 2.947823 | 2.944119 | 2.835189 | 2.654721  |
| ENSMUSG Eif2ak4   | 7.50621  | 7.186609 | 6.683196 | 6.204341 | 5.797468 | 6.584073  |
| ENSMUSG Wdr1      | 50.83723 | 48.06871 | 53.90152 | 53.23573 | 57.79108 | 64.314499 |
| ENSMUSG Zfp458    | 1.117515 | 1.276129 | 0.88057  | 1.139836 | 1.391548 | 1.100814  |
| ENSMUSG Soga1     | 16.94899 | 14.87275 | 13.09887 | 11.06259 | 11.97829 | 11.67942  |
| ENSMUSG Gm3880    | 0        | 0        | 0        | 0        | 0        | 0         |
| Mus_musc Mus_musc | 0        | 0.06426  | 0        | 0.3733   | 0        | 0.175103  |
| Mus_musc Mus_musc | 0.60591  | 0.653211 | 0.559496 | 0.53809  | 0.375019 | 0.589102  |
| Mus_musc Mus_musc | 0        | 0        | 0        | 0        | 0        | 0         |
| Mus_musc Mus_musc | 0        | 0.263875 | 0        | 0.168841 | 0        | 0         |
| Mus_musc Mus_musc | 0        | 0.308619 | 0        | 0        | 0        | 0         |
| Mus_musc Mus_musc | 0        | 0        | 0        | 0.347261 | 0        | 0.105366  |
| ENSMUSG Pcolce2   | 47.48618 | 42.24968 | 50.62948 | 28.04516 | 28.43346 | 23.896889 |
| ENSMUSG Cd48      | 9.635205 | 9.139767 | 15.11124 | 21.94306 | 20.00677 | 22.329412 |
| ENSMUSG Clpx      | 15.63958 | 15.51632 | 14.48091 | 12.90619 | 12.43705 | 13.287634 |
| ENSMUSG Dxo       | 8.738232 | 8.281058 | 10.58893 | 10.60349 | 8.195423 | 9.028939  |
| ENSMUSG Xaf1      | 12.62929 | 9.726267 | 22.29265 | 10.68387 | 7.136099 | 8.211249  |
| ENSMUSG Bptf      | 16.59508 | 18.64494 | 14.03184 | 14.52458 | 14.89188 | 14.939482 |
| ENSMUSG Lrrc52    | 0.045404 | 0.197532 | 0.126222 | 0.09089  | 0        | 0.04802   |
| ENSMUSG Ltbp4     | 120.5865 | 101.4946 | 120.3959 | 58.13145 | 60.79502 | 61.352052 |
| ENSMUSG Sox30     | 0        | 0        | 0        | 0.069676 | 0        | 0.018191  |
| ENSMUSG Usp42     | 4.850142 | 5.505691 | 5.091732 | 4.202671 | 4.027622 | 4.646814  |
| Mus_musc Mus_musc | 0.61798  | 0.695989 | 0.441161 | 0.442931 | 0.447259 | 0.148344  |
| Mus_musc Mus_musc | 0        | 0.477329 | 0        | 0.191005 | 0.438525 | 0.338359  |
| Mus_musc Mus_musc | 0.892599 | 0.71643  | 0.116603 | 0.048291 | 0.513988 | 0.294337  |
| Mus_musc Mus_musc | 0.188031 | 0        | 0        | 0        | 0        | 0         |
| Mus_musc Mus_musc | 0.575651 | 1.140507 | 0.954077 | 0.284774 | 0.200977 | 0         |
| Mus_musc Mus_musc | 0.192018 | 0.119685 | 0.152819 | 0.396917 | 0        | 0         |
| Mus_musc Mus_musc | 0        | 0        | 0        | 0        | 0        | 0         |
| Mus_musc Mus_musc | 0.147155 | 0.210857 | 0        | 0        | 0        | 0         |
| ENSMUSG Sfn       | 3.748855 | 4.956838 | 4.837041 | 5.587181 | 5.13017  | 6.780521  |
| ENSMUSG Neur14    | 10.87693 | 11.57301 | 11.58084 | 11.12403 | 10.05939 | 10.247441 |
| ENSMUSG Olfr370   | 0.006091 | 0        | 0        | 0        | 0        | 0         |
| ENSMUSG Aadat     | 0        | 0        | 0        | 0        | 0        | 0         |
| ENSMUSG Dmac2     | 8.296801 | 8.532951 | 8.084167 | 9.386004 | 8.092748 | 9.061442  |
| Mus_musc Mus_musc | 0        | 0.233711 | 0        | 0.059132 | 0.129597 | 0         |
| Mus_musc Mus_musc | 0        | 0        | 0        | 0.106049 | 0        | 0.341325  |
| Mus_musc Mus_musc | 0.122208 | 0.249958 | 0.060514 | 0        | 0.024572 | 0         |
| ENSMUSG Olfr374   | 0        | 0.006637 | 0.024065 | 0.017366 | 0        | 0.052475  |
| Mus_musc Mus_musc | 0        | 0        | 0        | 0        | 0        | 0         |
| Mus_musc Mus_musc | 0.403165 | 0.582237 | 0.57476  | 0.498425 | 0.64673  | 0.486293  |
| Mus_musc Mus_musc | 0        | 0.156625 | 0        | 0.100896 | 0.181853 | 0.085189  |
| ENSMUSG Fxyd6     | 4.650312 | 4.998146 | 4.805287 | 4.391593 | 3.277924 | 4.074997  |
| ENSMUSG Cyp2b19   | 0.061488 | 0.042745 | 0.126764 | 0.013782 | 0.041427 | 0.049609  |
| ENSMUSG Hsd11b1   | 100.657  | 102.1614 | 130.4625 | 66.05479 | 77.53098 | 56.03392  |
| ENSMUSG Gm3015    | 0        | 0        | 0        | 0        | 0        | 0         |
| ENSMUSG Gm21987   | 0        | 0.145665 | 0.325676 | 0        | 0.102359 | 0         |
| ENSMUSG Gm21725   | 0        | 0        | 0        | 0        | 0        | 0         |
| ENSMUSG Entpd4    | 6.420793 | 5.881231 | 5.135209 | 4.432436 | 6.22722  | 6.552238  |

|                    |          |          |          |          |          |           |
|--------------------|----------|----------|----------|----------|----------|-----------|
| ENSMUSG A630001G   | 2.501919 | 1.66489  | 2.491264 | 4.962453 | 3.820195 | 5.306843  |
| ENSMUSG Zfp212     | 9.511531 | 9.39744  | 10.67036 | 8.302267 | 7.620394 | 8.09249   |
| Mus_musc Mus_musc  | 0        | 0        | 0        | 0.195095 | 0        | 0         |
| Mus_musc Mus_musc  | 0        | 0.084736 | 0.220691 | 0.301762 | 0        | 0.248421  |
| Mus_musc Mus_musc  | 0.220123 | 0.209208 | 0.583561 | 0.097884 | 0.75036  | 0.188614  |
| Mus_musc Mus_musc  | 0        | 0        | 0.203306 | 0.331831 | 0.571021 | 0.349319  |
| Mus_musc Mus_musc  | 0.204129 | 0.261679 | 0.200323 | 0.354055 | 0.493086 | 0.280809  |
| ENSMUSG Cyb5r3     | 178.753  | 167.4068 | 176.4989 | 129.6652 | 128.7539 | 137.04301 |
| ENSMUSG Rrp7a      | 13.49627 | 14.68217 | 14.94256 | 12.83421 | 14.14343 | 13.734821 |
| ENSMUSG Amigo1     | 3.625885 | 4.027212 | 4.101594 | 3.302329 | 3.534143 | 3.131322  |
| ENSMUSG Efcab5     | 0.142458 | 0.237531 | 0.129189 | 0.166688 | 0.213489 | 0.164557  |
| ENSMUSG Zfp438     | 2.302769 | 2.183399 | 1.955382 | 1.406207 | 1.35602  | 1.243186  |
| ENSMUSG Hadha      | 30.58933 | 33.37411 | 29.44195 | 29.67549 | 32.1016  | 32.904495 |
| ENSMUSG Try10      | 0        | 0        | 0        | 0        | 0        | 0         |
| ENSMUSG Olfr531    | 0        | 0        | 0        | 0.026951 | 0        | 0         |
| ENSMUSG Sim2       | 0        | 0        | 0        | 0        | 0        | 0.013725  |
| ENSMUSG Sigmar1    | 19.32075 | 18.08581 | 20.90441 | 19.96862 | 19.26699 | 21.294399 |
| ENSMUSG Cbx7       | 14.80506 | 14.17415 | 14.52753 | 10.10879 | 9.913436 | 8.943296  |
| ENSMUSG Tmem161a   | 11.53335 | 12.34218 | 12.27264 | 9.568108 | 10.23655 | 10.110671 |
| ENSMUSG Ncan       | 0        | 0.025736 | 0        | 0.035313 | 0.012299 | 0.045285  |
| ENSMUSG Slc25a42   | 4.860157 | 4.718099 | 5.03452  | 3.782372 | 3.836346 | 4.372521  |
| ENSMUSG Borcs8     | 21.43464 | 22.94006 | 22.55228 | 23.39262 | 21.77494 | 25.637464 |
| ENSMUSG Olfr160    | 0        | 0        | 0        | 0        | 0        | 0         |
| ENSMUSG Usmg5      | 47.04743 | 41.60544 | 48.80024 | 56.62498 | 52.59105 | 53.769222 |
| ENSMUSG Gm21970    | 0        | 0        | 0        | 0        | 0        | 0         |
| ENSMUSG Cldn17     | 0        | 0        | 0        | 0        | 0        | 0         |
| ENSMUSG Mta3       | 13.29783 | 14.46957 | 15.37054 | 16.10102 | 14.50819 | 15.704541 |
| ENSMUSG Tas2r124   | 0        | 0        | 0        | 0        | 0        | 0         |
| ENSMUSG Slc18a3    | 0        | 0.108074 | 0        | 0.019399 | 0        | 0         |
| ENSMUSG Gm20820    | 0        | 0        | 0        | 0        | 0        | 0         |
| ENSMUSG Btbd35f23  | 0        | 0        | 0        | 0        | 0        | 0         |
| ENSMUSG Il25       | 0        | 0        | 0        | 0        | 0        | 0         |
| ENSMUSG Olfr1484   | 0        | 0        | 0        | 0        | 0        | 0         |
| ENSMUSG Acyp2      | 7.92331  | 7.242522 | 6.085226 | 6.713737 | 3.679777 | 4.555782  |
| ENSMUSG Tcstv1     | 0        | 0        | 0        | 0        | 0        | 0         |
| ENSMUSG Gm6176     | 0        | 0        | 0        | 0        | 0        | 0         |
| ENSMUSG Inhbb      | 3.374358 | 2.992621 | 2.605865 | 3.718711 | 3.850206 | 3.839169  |
| ENSMUSG Pax1       | 0        | 0.032578 | 0        | 0        | 0        | 0.048294  |
| ENSMUSG Tspan15    | 25.82674 | 23.93356 | 22.83356 | 16.27356 | 17.11035 | 16.165812 |
| ENSMUSG Clca3b     | 0        | 0.077453 | 0        | 0.355902 | 0.200635 | 0.131709  |
| ENSMUSG Apbb1      | 31.48763 | 36.86726 | 29.47946 | 24.46781 | 27.64495 | 26.96569  |
| ENSMUSG Ubtf       | 37.09566 | 38.15525 | 39.32085 | 32.87916 | 34.23509 | 35.018864 |
| ENSMUSG Lsm12      | 8.983512 | 9.497428 | 9.653361 | 8.972919 | 8.391089 | 7.978927  |
| ENSMUSG Tmem101    | 7.449291 | 7.259423 | 8.084143 | 7.729955 | 8.428376 | 7.729328  |
| ENSMUSG Kif1a      | 0.801366 | 0.958223 | 0.791885 | 1.17693  | 1.357793 | 1.372224  |
| ENSMUSG Adam11     | 0.196496 | 0.319313 | 0.255705 | 0.344997 | 0.461425 | 0.302561  |
| ENSMUSG Ccdc43     | 7.959205 | 8.001965 | 7.785936 | 6.665578 | 6.457654 | 6.358162  |
| ENSMUSG Slc25a11   | 35.91772 | 33.92382 | 30.48095 | 34.33628 | 31.10691 | 34.96303  |
| ENSMUSG Chrne      | 0        | 0        | 0.125614 | 0.081947 | 0        | 0.071919  |
| ENSMUSG Eftud2     | 20.42918 | 18.7367  | 20.17087 | 16.11073 | 17.76928 | 18.44186  |
| ENSMUSG Higd1b     | 27.3018  | 26.31822 | 32.26425 | 20.92183 | 17.93042 | 19.559497 |
| ENSMUSG 1700025B   | 0        | 0        | 0        | 0        | 0        | 0         |
| ENSMUSG Gm525      | 0        | 0.144923 | 0.381547 | 0.510801 | 0.585215 | 0.682317  |
| ENSMUSG Adamts9    | 3.874715 | 5.143987 | 4.453107 | 4.923525 | 5.285654 | 5.062201  |
| ENSMUSG Prickle2   | 22.32492 | 21.85073 | 17.25173 | 13.05173 | 11.60506 | 12.761991 |
| ENSMUSG Gm17026    | 0        | 0        | 0        | 0        | 0        | 0         |
| ENSMUSG Lrig1      | 7.01839  | 7.886803 | 6.386617 | 7.334101 | 7.952724 | 7.776124  |
| ENSMUSG Gm17268    | 0        | 0        | 0        | 0        | 0        | 0         |
| ENSMUSG Gm6676     | 0        | 0        | 0        | 0        | 0        | 0         |
| ENSMUSG Olfr1438-p | 0        | 0        | 0        | 0        | 0        | 0         |
| ENSMUSG Bbs5       | 4.579841 | 3.79006  | 3.610262 | 4.167023 | 3.564158 | 3.48831   |
| ENSMUSG Vmn2r68    | 0        | 0        | 0        | 0        | 0        | 0         |
| ENSMUSG Gm10057    | 0        | 0        | 0        | 0        | 0        | 0         |
| ENSMUSG Kcnma1     | 0.118433 | 0.156871 | 0.103731 | 0.063324 | 0.071241 | 0.137941  |

|                   |          |          |          |          |          |           |
|-------------------|----------|----------|----------|----------|----------|-----------|
| ENSMUSG Prmt1     | 26.03396 | 23.2447  | 25.98104 | 24.90127 | 21.82673 | 22.581043 |
| ENSMUSG Pirt      | 0.045038 | 0        | 0        | 0.01881  | 0.040139 | 0.013156  |
| ENSMUSG H1fnt     | 0        | 0        | 0        | 0        | 0        | 0         |
| ENSMUSG Arf1      | 271.484  | 262.7501 | 269.4927 | 236.3664 | 245.3576 | 243.68788 |
| ENSMUSG Znfx1     | 19.20834 | 17.95406 | 23.13121 | 16.18135 | 14.67818 | 15.439095 |
| ENSMUSG Tenm4     | 0.129861 | 0.210327 | 0.086764 | 0.679083 | 0.370146 | 0.483607  |
| ENSMUSG Nup133    | 4.181913 | 4.791542 | 4.741032 | 3.615481 | 3.813066 | 4.166389  |
| ENSMUSG Calhm4    | 0.012971 | 0        | 0.010516 | 0        | 0        | 0         |
| ENSMUSG Immp2l    | 1.951709 | 1.402322 | 1.779477 | 1.230481 | 1.54187  | 0.62005   |
| ENSMUSG Hist3h2ba | 0.393519 | 1.061316 | 0.436373 | 0.613591 | 0.374905 | 0.098994  |
| ENSMUSG Speer4c   | 0        | 0.106246 | 0        | 2.925469 | 2.294866 | 1.448303  |
| ENSMUSG Klf14     | 0        | 0        | 0        | 0.01452  | 0.009164 | 0         |
| ENSMUSG Aoah      | 0.350829 | 0.280356 | 0.962722 | 1.055952 | 0.82468  | 1.056817  |
| ENSMUSG Trim27    | 7.975082 | 8.175765 | 7.223765 | 9.968367 | 7.896906 | 10.74149  |
| ENSMUSG Zkscan3   | 19.26964 | 19.75887 | 18.86297 | 16.93915 | 14.65438 | 14.821196 |
| ENSMUSG Pak2      | 25.12156 | 25.08983 | 23.96641 | 22.40301 | 25.41549 | 22.484404 |
| ENSMUSG Meltf     | 0        | 0        | 0        | 0.010189 | 0.013551 | 0.013369  |
| ENSMUSG Spag6l    | 4.185762 | 5.826165 | 3.226709 | 6.154452 | 6.589366 | 6.574214  |
| ENSMUSG Slc6a14   | 37.25732 | 31.26389 | 30.43702 | 21.32818 | 20.1295  | 20.813261 |
| ENSMUSG Wdr53     | 5.457362 | 3.604153 | 6.898012 | 4.510857 | 4.829894 | 5.855575  |
| ENSMUSG Dnm1l     | 18.62196 | 19.55305 | 17.20804 | 17.15547 | 16.913   | 16.921053 |
| ENSMUSG Fgd4      | 3.327552 | 3.573241 | 3.192124 | 4.212693 | 4.727745 | 4.090396  |
| ENSMUSG Gm498     | 0        | 0        | 0        | 0        | 0        | 0         |
| Mus_musc Mus_musc | 4.473562 | 3.92742  | 0.856838 | 210.1914 | 140.5273 | 107.32536 |
| Mus_musc Mus_musc | 5.586425 | 2.008456 | 1.161561 | 127.9688 | 601.6353 | 224.08899 |
| Mus_musc Mus_musc | 1.862407 | 1.093637 | 2.099635 | 42.20166 | 180.8677 | 725.70001 |
| Mus_musc Mus_musc | 0        | 0        | 0        | 0        | 0.082959 | 0.083309  |
| Mus_musc Mus_musc | 0        | 0.102646 | 0        | 324.5911 | 23.36509 | 22.731079 |
| Mus_musc Mus_musc | 0.576179 | 0.297512 | 0        | 9.503469 | 15.43353 | 31.131958 |
| ENSMUSG Rabepk    | 3.419667 | 4.438875 | 3.463996 | 3.402835 | 3.71488  | 3.66413   |
| Mus_musc Mus_musc | 0        | 0.160498 | 0        | 1.898378 | 0        | 0.65132   |
| Mus_musc Mus_musc | 0        | 0.052848 | 0        | 1.591783 | 0.248316 | 0.853898  |
| ENSMUSG Srrm1     | 37.43235 | 32.68871 | 34.32543 | 27.88475 | 28.09638 | 25.981275 |
| ENSMUSG Pramel6   | 0        | 0        | 0        | 0        | 0        | 0         |
| ENSMUSG Pramel7   | 0        | 0        | 0        | 0        | 0        | 0         |
| ENSMUSG Hdac1     | 25.04075 | 25.43396 | 27.17793 | 22.56344 | 21.28027 | 23.40094  |
| ENSMUSG Stpg1     | 0.553757 | 0.388107 | 0.287972 | 0.572499 | 0.466025 | 0.397638  |
| ENSMUSG Nipal3    | 28.68786 | 28.15073 | 25.88833 | 21.02032 | 21.99276 | 20.329077 |
| ENSMUSG Csm2      | 0        | 0        | 0.010593 | 0        | 0        | 0.004076  |
| ENSMUSG Zbtb8a    | 7.433788 | 7.54393  | 6.180714 | 5.238019 | 4.997914 | 4.89721   |
| ENSMUSG Parvg     | 5.670169 | 4.211803 | 5.754865 | 6.615273 | 5.683609 | 6.468878  |
| ENSMUSG Parvb     | 29.05349 | 28.01154 | 30.29874 | 18.1608  | 17.2711  | 17.218882 |
| ENSMUSG Csnk1e    | 33.15357 | 32.00168 | 33.25703 | 22.32094 | 22.95892 | 24.070427 |
| ENSMUSG Smc1b     | 0        | 0        | 0        | 0.011483 | 0.024588 | 0         |
| ENSMUSG Bnip2     | 77.29752 | 79.21078 | 80.87661 | 65.95882 | 66.70237 | 63.799219 |
| ENSMUSG Samm50    | 11.55842 | 11.92191 | 11.36674 | 10.53119 | 11.40701 | 11.871089 |
| ENSMUSG Sh3bp1    | 12.77238 | 10.87261 | 15.63509 | 16.1166  | 15.29134 | 17.244868 |
| ENSMUSG Upk3a     | 0.75247  | 1.233768 | 0.603873 | 0.539769 | 0.353571 | 0.275858  |
| ENSMUSG Fam118a   | 5.076231 | 4.831184 | 6.4384   | 4.631121 | 5.501335 | 4.552649  |
| ENSMUSG Hspb6     | 3.445128 | 5.472148 | 3.207119 | 3.735347 | 4.175169 | 2.95725   |
| ENSMUSG Dpm3      | 27.13898 | 26.20296 | 30.75516 | 29.51145 | 26.57548 | 22.100533 |
| ENSMUSG Wnt4      | 1.438996 | 2.037294 | 1.352577 | 1.316158 | 0.990395 | 1.062685  |
| ENSMUSG Mrpl41    | 14.11311 | 13.1594  | 17.16815 | 15.02742 | 14.57843 | 16.657124 |
| ENSMUSG St8sia2   | 1.929597 | 2.375322 | 2.093822 | 1.978198 | 2.205738 | 2.254701  |
| ENSMUSG Mcoln3    | 1.234837 | 0.964085 | 1.74782  | 0.912523 | 0.782535 | 0.854761  |
| ENSMUSG Clec3b    | 113.8358 | 136.5025 | 108.764  | 73.5331  | 64.98456 | 71.406387 |
| ENSMUSG Exosc7    | 22.54576 | 21.71569 | 24.5909  | 22.1418  | 18.59168 | 22.3037   |
| ENSMUSG Zdhhc3    | 34.93368 | 37.20153 | 29.95787 | 27.14692 | 26.90406 | 28.661743 |
| ENSMUSG Tgm4      | 0.179877 | 0.180677 | 0.134451 | 0.121372 | 0.085789 | 0.062306  |
| ENSMUSG Ptcra     | 0        | 0        | 0        | 0        | 0        | 0         |
| ENSMUSG Atp5c1    | 86.84594 | 94.01996 | 89.4102  | 109.5147 | 103.6948 | 109.60974 |
| ENSMUSG Taf3      | 5.961398 | 5.403565 | 5.516665 | 4.93122  | 4.203141 | 4.416673  |
| ENSMUSG 4930412O  | 0        | 0        | 0.027468 | 0        | 0.1529   | 0         |
| ENSMUSG Rttm      | 1.984032 | 1.816159 | 1.586728 | 1.676593 | 1.915934 | 1.35698   |

|                   |          |          |          |          |          |           |
|-------------------|----------|----------|----------|----------|----------|-----------|
| ENSMUSG Suox      | 8.279094 | 9.052659 | 9.68682  | 7.112064 | 8.72005  | 7.846214  |
| ENSMUSG Ntf3      | 0.839631 | 1.329187 | 0.62562  | 0.749677 | 1.128391 | 1.020636  |
| ENSMUSG Slc12a8   | 0.168373 | 0.175274 | 0        | 0.381176 | 0.411773 | 0.428728  |
| ENSMUSG Cox18     | 6.978114 | 6.410381 | 7.160128 | 6.882969 | 5.48762  | 8.064149  |
| ENSMUSG Reep6     | 12.03757 | 15.74076 | 7.872032 | 11.07388 | 12.1064  | 11.683354 |
| ENSMUSG Prr11     | 0.562767 | 0.443014 | 0.393626 | 1.051839 | 1.260613 | 1.435343  |
| ENSMUSG Ska2      | 4.29649  | 4.946407 | 4.896034 | 4.803023 | 4.313073 | 3.917066  |
| ENSMUSG 2810021J2 | 2.274714 | 1.852869 | 2.242865 | 2.561764 | 2.334017 | 1.909991  |
| ENSMUSG Btnl10    | 0.136707 | 0.021042 | 0        | 0.011113 | 0        | 0         |
| ENSMUSG Rnf187    | 49.64414 | 49.3815  | 51.1875  | 39.40657 | 41.37765 | 44.793099 |
| ENSMUSG Smg8      | 8.486599 | 8.548196 | 8.789433 | 6.50743  | 6.700126 | 7.471334  |
| ENSMUSG Ccp110    | 5.682033 | 6.64625  | 4.812386 | 6.144716 | 5.965934 | 6.482815  |
| ENSMUSG Zdhhc15   | 1.050915 | 0.782666 | 0.922633 | 0.732975 | 0.673773 | 0.562689  |
| ENSMUSG Map9      | 1.992614 | 1.881708 | 1.336477 | 1.915109 | 1.835879 | 2.017321  |
| ENSMUSG Ptgr1     | 9.824315 | 10.92111 | 8.568985 | 10.57557 | 11.31828 | 12.838287 |
| ENSMUSG Mapkbp1   | 7.846724 | 7.937881 | 8.280634 | 7.542518 | 6.839282 | 7.077812  |
| ENSMUSG Usp36     | 8.467633 | 7.103258 | 8.100758 | 6.290814 | 7.234173 | 7.19701   |
| ENSMUSG Astn2     | 3.057977 | 3.436074 | 3.988083 | 2.973607 | 3.064159 | 3.126662  |
| ENSMUSG Pappa     | 0.297641 | 0.406449 | 0.280437 | 0.170118 | 0.2385   | 0.204898  |
| ENSMUSG Rab1a     | 81.68884 | 76.98633 | 84.60947 | 72.9507  | 74.72501 | 75.52721  |
| ENSMUSG Lgr5      | 0.08907  | 0.076238 | 0.05053  | 0.028904 | 0        | 0.022076  |
| ENSMUSG Dock2     | 8.328158 | 7.051071 | 10.07444 | 17.5352  | 15.8349  | 18.122143 |
| ENSMUSG Slc1a4    | 7.090504 | 7.649634 | 7.547855 | 8.670408 | 8.530477 | 9.320782  |
| ENSMUSG Olfr1019  | 0        | 0        | 0        | 0        | 0        | 0         |
| ENSMUSG Olfr1016  | 0        | 0        | 0        | 0        | 0        | 0         |
| ENSMUSG Olfr1044  | 0        | 0        | 0        | 0        | 0        | 0         |
| ENSMUSG Olfr1043  | 0        | 0        | 0        | 0        | 0        | 0         |
| ENSMUSG Olfr1042  | 0        | 0        | 0        | 0        | 0        | 0         |
| ENSMUSG Olfr1040  | 0        | 0        | 0        | 0        | 0        | 0         |
| ENSMUSG Olfr1039  | 0        | 0        | 0        | 0        | 0        | 0         |
| ENSMUSG Olfr1037  | 0        | 0        | 0        | 0        | 0        | 0         |
| ENSMUSG Olfr1024  | 0        | 0        | 0        | 0        | 0        | 0         |
| ENSMUSG Elp5      | 17.70183 | 16.48872 | 16.29446 | 16.1169  | 16.06425 | 15.512815 |
| ENSMUSG Slc2a4    | 1.254082 | 3.209533 | 1.205597 | 2.209866 | 1.735245 | 1.577849  |
| ENSMUSG Gabarap   | 131.2151 | 142.9369 | 130.2597 | 143.6702 | 139.4128 | 150.95075 |
| ENSMUSG Cldn7     | 26.23555 | 29.61599 | 21.84916 | 23.80128 | 20.12494 | 23.111042 |
| ENSMUSG Zfp503    | 20.75139 | 18.2982  | 17.26306 | 15.11724 | 14.4989  | 11.82654  |
| ENSMUSG Ss18l1    | 2.036589 | 1.77177  | 2.189324 | 1.947675 | 1.889298 | 2.116998  |
| ENSMUSG Rreb1     | 12.18304 | 10.95732 | 10.08345 | 10.81842 | 11.93154 | 12.479182 |
| ENSMUSG Ccdc171   | 0.404956 | 0.475954 | 0.356292 | 0.441658 | 0.553962 | 0.569878  |
| ENSMUSG Rexo4     | 12.86385 | 15.11813 | 14.38838 | 13.99647 | 15.12502 | 16.283848 |
| ENSMUSG Slc16a13  | 2.703108 | 2.685043 | 2.826383 | 2.952912 | 2.516319 | 3.10932   |
| ENSMUSG Cxxc4     | 0.267253 | 0.357182 | 0.341106 | 0.427767 | 0.293383 | 0.153618  |
| ENSMUSG L3mbtl3   | 6.050355 | 7.071374 | 6.109598 | 5.765667 | 6.4437   | 5.351743  |
| ENSMUSG Ccdc89    | 0.449012 | 0.523752 | 0.243274 | 0.932936 | 0.38721  | 0.955604  |
| ENSMUSG BC024139  | 0        | 0.044452 | 0.029552 | 0.120314 | 0.068436 | 0         |
| ENSMUSG Wipf3     | 10.98513 | 10.60315 | 9.788338 | 6.696057 | 6.455692 | 5.648776  |
| ENSMUSG Lonrf2    | 0.04831  | 0.07918  | 0.021836 | 0.041421 | 0.032049 | 0.037597  |
| ENSMUSG Olfr202   | 0        | 0        | 0        | 0        | 0        | 0         |
| ENSMUSG Gm26920   | 0.512153 | 0.491213 | 0.386042 | 0        | 0.221597 | 0.110637  |
| ENSMUSG Znrf2     | 10.5239  | 11.4096  | 11.04902 | 12.06994 | 11.61329 | 11.09394  |
| ENSMUSG Map2k5    | 8.985271 | 8.758788 | 8.548755 | 8.038178 | 9.104363 | 8.252953  |
| ENSMUSG Rpl10-ps3 | 18.95705 | 8.669234 | 8.697752 | 7.118095 | 23.5578  | 23.856663 |
| ENSMUSG Panx2     | 0.106187 | 0.212283 | 0.048125 | 0.138001 | 0.218736 | 0.187337  |
| ENSMUSG Nrf1      | 10.7626  | 10.9069  | 11.12781 | 7.455054 | 8.319289 | 9.204012  |
| ENSMUSG Pou4f3    | 0        | 0        | 0        | 0        | 0        | 0         |
| ENSMUSG Rhog      | 57.0433  | 51.74523 | 66.40882 | 57.30745 | 55.2006  | 59.269368 |
| ENSMUSG Lars      | 12.36775 | 12.34322 | 12.00211 | 13.04984 | 12.92217 | 12.422134 |
| ENSMUSG Ggh       | 11.25806 | 12.07261 | 9.907181 | 9.893594 | 10.65477 | 9.165867  |
| ENSMUSG Ttpa      | 0.966471 | 1.236406 | 0.857433 | 0.595423 | 0.641177 | 0.859179  |
| ENSMUSG Tcerg1    | 9.401682 | 9.268513 | 9.49114  | 8.874158 | 8.927518 | 8.521954  |
| ENSMUSG Gm4792    | 0        | 0        | 0        | 0        | 0        | 0         |
| ENSMUSG Nfatc1    | 14.54162 | 13.06948 | 13.04865 | 11.36356 | 11.01715 | 11.440641 |
| ENSMUSG Trim33    | 9.326345 | 9.007285 | 7.867769 | 8.454549 | 6.919626 | 8.621616  |

|                   |          |          |          |          |          |           |
|-------------------|----------|----------|----------|----------|----------|-----------|
| ENSMUSG Olfr295   | 0        | 0        | 0        | 0        | 0        | 0         |
| ENSMUSG Slc27a4   | 10.3786  | 8.784064 | 9.488866 | 9.363566 | 10.99346 | 10.8333   |
| ENSMUSG Ctcf      | 23.90579 | 23.11112 | 23.02576 | 21.12042 | 22.1363  | 20.999229 |
| ENSMUSG Pard6a    | 3.129703 | 3.440625 | 3.585412 | 3.144929 | 2.99075  | 3.68797   |
| ENSMUSG Sh2d1a    | 1.22082  | 0.59851  | 3.18128  | 2.038334 | 1.647258 | 1.897348  |
| ENSMUSG Stxbp2    | 25.75413 | 20.55129 | 24.7426  | 32.50009 | 28.17061 | 31.143581 |
| ENSMUSG Arhgef18  | 24.21619 | 22.56208 | 22.34931 | 16.36662 | 16.42074 | 16.448587 |
| ENSMUSG Pnpla6    | 10.40774 | 10.21957 | 10.46076 | 11.09535 | 9.966236 | 9.804683  |
| ENSMUSG Mcoln1    | 16.50491 | 13.64855 | 16.70445 | 13.09131 | 14.87931 | 15.929272 |
| ENSMUSG Olfr1431  | 0        | 0        | 0        | 0        | 0        | 0         |
| ENSMUSG Gm3264    | 0        | 0        | 0        | 0        | 0        | 0         |
| ENSMUSG Arhgef40  | 8.361211 | 8.577137 | 10.10272 | 7.839494 | 8.035196 | 8.295271  |
| ENSMUSG Olfr432   | 0.007384 | 0.060005 | 0.061853 | 0.019273 | 0.012355 | 0.041039  |
| ENSMUSG Tmem164   | 19.16323 | 19.57449 | 17.85086 | 23.86224 | 22.00914 | 25.044161 |
| ENSMUSG D030056L  | 11.03944 | 10.09231 | 9.547766 | 8.436407 | 9.529919 | 8.169044  |
| ENSMUSG Prr15l    | 41.97058 | 45.57541 | 31.04684 | 30.79372 | 34.09089 | 31.11085  |
| ENSMUSG Gm10382   | 0.071159 | 0        | 0        | 0.105512 | 0.090093 | 0.022792  |
| Mus_musc Mus_musc | 0.49527  | 0.850293 | 1.267549 | 1.081429 | 0.932948 | 0.925159  |
| Mus_musc Mus_musc | 0        | 0        | 0        | 0.174016 | 0        | 0         |
| Mus_musc Mus_musc | 0        | 0        | 0        | 0        | 0        | 0         |
| Mus_musc Mus_musc | 0.202131 | 0        | 0        | 0.072821 | 0.046875 | 0         |
| Mus_musc Mus_musc | 0        | 0.154309 | 0        | 0        | 0        | 0         |
| Mus_musc Mus_musc | 0        | 0        | 0        | 0        | 0        | 0         |
| ENSMUSG Tmem176l  | 187.268  | 181.5372 | 183.8772 | 220.2338 | 222.5846 | 221.69235 |
| ENSMUSG Aoc1      | 0.499469 | 0.368576 | 0.259879 | 1.366536 | 1.037507 | 1.156239  |
| ENSMUSG 1600015l1 | 0        | 0        | 0        | 0        | 0        | 0.022236  |
| ENSMUSG Apt       | 28.4346  | 24.41088 | 27.14394 | 32.38171 | 28.54991 | 33.586799 |
| ENSMUSG Malsu1    | 3.372394 | 3.889146 | 3.707695 | 4.094229 | 4.081432 | 4.293093  |
| ENSMUSG Gpnmb     | 5.06597  | 3.631239 | 5.726755 | 53.45401 | 45.22054 | 60.967266 |
| ENSMUSG Tra2a     | 44.16742 | 51.06471 | 55.09672 | 37.11753 | 37.13281 | 41.203958 |
| ENSMUSG Rab42     | 0.259439 | 0.433323 | 0.23065  | 0.775412 | 0.325324 | 0.658811  |
| ENSMUSG Npy       | 1.12088  | 0.794993 | 1.170913 | 3.80901  | 2.101374 | 2.443885  |
| ENSMUSG Snai3     | 0.189163 | 0.256525 | 0.330961 | 0.285502 | 0.133253 | 0.206927  |
| ENSMUSG Runx1t1   | 1.476028 | 1.413424 | 1.464518 | 1.376803 | 1.122691 | 0.861624  |
| ENSMUSG Bcl2l2    | 39.29232 | 38.67533 | 39.74631 | 27.34371 | 26.56847 | 28.366745 |
| ENSMUSG Vmn2r67   | 0        | 0        | 0        | 0        | 0        | 0         |
| ENSMUSG Olfr854   | 0        | 0        | 0        | 0        | 0        | 0         |
| ENSMUSG H2a1g     | 0        | 0        | 0        | 0        | 0        | 0         |
| ENSMUSG Gm2310    | 0        | 0        | 0        | 0        | 0        | 0         |
| ENSMUSG Klf4      | 84.67336 | 66.64444 | 94.29395 | 29.1294  | 33.05353 | 36.107298 |
| ENSMUSG Ap1m1     | 23.22487 | 21.3353  | 23.64059 | 20.82051 | 21.24616 | 20.562125 |
| Mus_musc Mus_musc | 0.524059 | 0        | 0        | 0.772215 | 1.595817 | 1.952462  |
| ENSMUSG Cdkn1b    | 37.70066 | 38.28217 | 36.79623 | 34.24354 | 34.47021 | 28.593808 |
| Mus_musc Mus_musc | 0.811383 | 0.145047 | 0.252828 | 0.512552 | 0.441388 | 0.403049  |
| ENSMUSG Rab8a     | 13.99021 | 14.56759 | 16.13751 | 15.60927 | 16.03402 | 16.552206 |
| Mus_musc Mus_musc | 0.205014 | 0.277392 | 0.189345 | 0.525366 | 0.516014 | 0.247238  |
| Mus_musc Mus_musc | 0.18944  | 0.030575 | 0.11651  | 0.538596 | 0.671581 | 0.635243  |
| ENSMUSG Hmgn2     | 15.799   | 11.33308 | 12.71157 | 10.98415 | 9.848006 | 13.113027 |
| Mus_musc Mus_musc | 0        | 0.056747 | 0        | 0        | 0        | 0.03      |
| Mus_musc Mus_musc | 1.008802 | 0.809623 | 0.401713 | 0.476548 | 0.600786 | 0.564495  |
| Mus_musc Mus_musc | 0        | 0        | 0        | 0        | 0        | 0.184186  |
| ENSMUSG Kcna3     | 5.515984 | 4.385077 | 3.022998 | 5.685077 | 5.495547 | 4.595553  |
| ENSMUSG Gp5       | 0.994076 | 0.880483 | 1.395549 | 0.776538 | 0.562456 | 0.599255  |
| ENSMUSG Ndufb2    | 9.4483   | 10.62634 | 12.01461 | 8.33358  | 12.66148 | 11.260396 |
| ENSMUSG Wdr5b     | 2.742578 | 1.954752 | 2.628244 | 2.610127 | 2.485187 | 1.657905  |
| ENSMUSG Tkfc      | 2.968816 | 2.156766 | 2.600627 | 3.121788 | 3.007554 | 3.505152  |
| ENSMUSG Tulp4     | 14.5421  | 14.96751 | 12.65903 | 11.6719  | 13.168   | 11.212735 |
| ENSMUSG Smim26    | 10.18124 | 8.764832 | 12.56297 | 8.662014 | 7.868825 | 7.239575  |
| Mus_musc Mus_musc | 0.026425 | 0        | 0        | 0        | 0.331416 | 0         |
| Mus_musc Mus_musc | 0.17144  | 0.08598  | 0        | 0.186527 | 0        | 0         |
| Mus_musc Mus_musc | 0.150892 | 0.10217  | 0.16327  | 0.287081 | 0.214302 | 0.12607   |
| Mus_musc Mus_musc | 0        | 0        | 0        | 0.261678 | 0        | 0         |
| Mus_musc Mus_musc | 0        | 0        | 0        | 0        | 0        | 0         |
| Mus_musc Mus_musc | 0.448962 | 0.570685 | 0.322499 | 0.484935 | 0.363883 | 0.648112  |



|                   |          |          |          |          |          |           |
|-------------------|----------|----------|----------|----------|----------|-----------|
| Mus_musc Mus_musc | 0.810323 | 0.663862 | 0.76866  | 0.651867 | 0.499889 | 0.488998  |
| Mus_musc Mus_musc | 0.344572 | 0.198401 | 0.326169 | 0.278327 | 0.20262  | 0.130527  |
| Mus_musc Mus_musc | 0        | 0        | 0        | 0.19223  | 0.240131 | 0.145861  |
| Mus_musc Mus_musc | 0.273631 | 0.333088 | 0.155974 | 0.146423 | 0        | 0.176649  |
| ENSMUSG Rbpjl     | 8.13524  | 6.377447 | 7.609206 | 6.868512 | 5.472023 | 7.027068  |
| ENSMUSG Svs5      | 0        | 0        | 0        | 0        | 0        | 0         |
| ENSMUSG Slpi      | 28.88471 | 27.15049 | 31.80916 | 728.0751 | 938.4051 | 776.40683 |
| ENSMUSG Svs3a     | 0        | 0.030475 | 0        | 0        | 0        | 0         |
| ENSMUSG Svs6      | 0        | 0        | 0        | 0        | 0        | 0         |
| ENSMUSG Sdc4      | 53.7488  | 56.76569 | 49.62083 | 53.27917 | 53.91585 | 57.422771 |
| ENSMUSG Gm5930    | 0        | 0.076094 | 0        | 0        | 0        | 0         |
| ENSMUSG Gm11077   | 0        | 0        | 0        | 0        | 0        | 0         |
| ENSMUSG Gm8257    | 0        | 0        | 0        | 0        | 0        | 0         |
| ENSMUSG Slco1a6   | 0.035135 | 0.27964  | 0.050591 | 0.035731 | 0.038731 | 0.097623  |
| ENSMUSG Gm6614    | 0        | 0        | 0        | 0        | 0        | 0         |
| ENSMUSG Tmppe     | 3.782237 | 3.657018 | 4.343903 | 3.699202 | 4.376645 | 4.105268  |
| ENSMUSG Gm15217   | 1.424443 | 1.17664  | 0.705413 | 0.843971 | 0.565292 | 0.902668  |
| ENSMUSG Gm3676    | 0        | 0        | 0        | 0        | 0        | 0         |
| Mus_musc Mus_musc | 0.082499 | 0.154835 | 0.586962 | 0.36897  | 0.090062 | 0.372387  |
| Mus_musc Mus_musc | 0.668106 | 0.734284 | 0.374913 | 0.254966 | 0.352641 | 0.226253  |
| Mus_musc Mus_musc | 0.537941 | 0.334519 | 0.599863 | 0.807139 | 1.023939 | 0.369706  |
| ENSMUSG ltga2     | 4.959514 | 4.828373 | 5.055199 | 3.812132 | 4.043197 | 3.710802  |
| Mus_musc Mus_musc | 212.9907 | 178.2255 | 274.2476 | 198.6943 | 140.1215 | 139.50917 |
| ENSMUSG Mocs2     | 25.17032 | 22.87431 | 26.08149 | 21.54919 | 21.74746 | 20.675608 |
| ENSMUSG Mettl24   | 9.291385 | 6.59392  | 10.04726 | 6.09876  | 4.456746 | 4.309284  |
| ENSMUSG Gm5678    | 0        | 0        | 0        | 0.019829 | 0        | 0         |
| ENSMUSG Gm6657    | 0        | 0.053464 | 0        | 0        | 0        | 0         |
| ENSMUSG Olfr827   | 0        | 0        | 0        | 0        | 0        | 0         |
| ENSMUSG Shh       | 4.255507 | 3.690269 | 3.427262 | 5.061688 | 4.846722 | 5.662029  |
| ENSMUSG Pdcd2l    | 10.51698 | 9.239729 | 8.962618 | 10.23692 | 7.89377  | 9.459279  |
| ENSMUSG Hao       | 2.065162 | 1.11597  | 1.875038 | 2.120683 | 1.985647 | 2.004451  |
| ENSMUSG Smim7     | 17.32286 | 17.5858  | 17.47694 | 17.05933 | 17.25278 | 16.299542 |
| ENSMUSG Grid1     | 0        | 0.028002 | 0        | 0.082445 | 0.09488  | 0.174462  |
| ENSMUSG Rwd2b     | 2.262929 | 1.859238 | 1.584081 | 2.03527  | 1.681997 | 2.708794  |
| ENSMUSG 4930432K  | 0.292021 | 0.371686 | 0.690477 | 0.435041 | 0.385891 | 0.266608  |
| ENSMUSG Fzd7      | 15.42982 | 15.55537 | 14.88826 | 12.60765 | 12.52618 | 12.953917 |
| ENSMUSG Nacad     | 0.710384 | 0.69701  | 0.553083 | 0.482813 | 0.54775  | 0.622575  |
| ENSMUSG Htr2c     | 0.448303 | 0.469848 | 0.450864 | 0.036127 | 0.10797  | 0.031722  |
| ENSMUSG Pin4      | 14.82295 | 13.82456 | 13.35667 | 13.4133  | 9.799726 | 11.975307 |
| ENSMUSG Nhsl2     | 2.736227 | 2.487554 | 2.444036 | 2.289657 | 2.242727 | 2.420563  |
| ENSMUSG Ucn3      | 0        | 0        | 0        | 0        | 0        | 0         |
| ENSMUSG Med12     | 10.45383 | 10.2642  | 9.60997  | 9.916004 | 10.00136 | 10.960398 |
| ENSMUSG Phyhd1    | 5.071191 | 4.744994 | 3.377535 | 5.836034 | 5.797526 | 4.73827   |
| ENSMUSG 1700049E1 | 0        | 0        | 0        | 0        | 0        | 0         |
| ENSMUSG Adam28    | 4.106201 | 5.095344 | 2.492384 | 6.624403 | 6.668552 | 7.262423  |
| ENSMUSG Gm5431    | 1.68769  | 1.829219 | 2.966344 | 4.287971 | 3.467451 | 3.038878  |
| ENSMUSG Tbx2      | 83.00231 | 61.37126 | 77.9166  | 41.3846  | 47.8318  | 41.093037 |
| ENSMUSG Olfr1124  | 0        | 0        | 0        | 0        | 0        | 0         |
| ENSMUSG Tbx4      | 25.75231 | 23.77398 | 25.65446 | 17.44726 | 18.69399 | 14.601947 |
| ENSMUSG Tmem37    | 20.15737 | 16.46169 | 19.04146 | 16.51972 | 17.63837 | 19.021339 |
| ENSMUSG Olfr1317  | 0        | 0        | 0        | 0        | 0        | 0         |
| ENSMUSG Wdr47     | 7.360348 | 7.696677 | 7.330956 | 5.668138 | 5.89288  | 5.34175   |
| ENSMUSG Ppp1ca    | 167.6657 | 175.6406 | 172.4012 | 174.9614 | 177.5234 | 186.96869 |
| ENSMUSG Khl32     | 0.310411 | 0.206243 | 0.198884 | 0.333829 | 0.266147 | 0.325208  |
| ENSMUSG Cbln3     | 0        | 0.026132 | 0.008422 | 0.010728 | 0        | 0         |
| ENSMUSG Aqr       | 14.62654 | 13.20705 | 13.08337 | 11.87915 | 11.88189 | 12.156524 |
| Mus_musc Mus_musc | 0        | 0        | 0        | 0.348032 | 0        | 0         |
| Mus_musc Mus_musc | 0.330071 | 0.336892 | 0.289088 | 0.451053 | 0.628498 | 0.611741  |
| Mus_musc Mus_musc | 0        | 0.154309 | 0        | 0        | 0        | 0         |
| Mus_musc Mus_musc | 0        | 0        | 0        | 0.174016 | 0        | 0         |
| Mus_musc Mus_musc | 0.351698 | 0.045647 | 0.099504 | 0        | 0        | 0         |
| Mus_musc Mus_musc | 0.613509 | 0.527232 | 0.697319 | 0.69482  | 0.355854 | 0.42925   |
| Mus_musc Mus_musc | 0        | 0        | 0        | 0        | 0        | 0         |
| ENSMUSG Nol4      | 0.020502 | 0.089282 | 0.029227 | 0        | 0.041984 | 0         |

|                   |          |          |          |          |          |           |
|-------------------|----------|----------|----------|----------|----------|-----------|
| ENSMUSG Slc16a6   | 2.664186 | 2.830797 | 2.49915  | 14.02073 | 15.51601 | 13.40947  |
| ENSMUSG Metap1d   | 5.363664 | 5.042385 | 5.391378 | 5.128668 | 4.36909  | 4.519116  |
| ENSMUSG Rnpep     | 25.02781 | 26.25294 | 26.52087 | 29.29275 | 33.75562 | 34.949691 |
| ENSMUSG Acad11    | 7.404436 | 8.769658 | 7.041219 | 7.51147  | 7.223035 | 7.677452  |
| ENSMUSG Gja6      | 0.079799 | 0.048274 | 0.13669  | 0.075922 | 0.047298 | 0.045202  |
| ENSMUSG Tmem191c  | 1.706924 | 1.816985 | 2.630132 | 2.567137 | 1.341865 | 1.813208  |
| Mus_musc Mus_musc | 0.310097 | 0.140773 | 0.325424 | 0.442878 | 0.51427  | 0.267555  |
| Mus_musc Mus_musc | 9.794613 | 10.33285 | 11.67164 | 0.584116 | 1.422585 | 10.700985 |
| Mus_musc Mus_musc | 1.895593 | 2.662764 | 1.781593 | 4.110515 | 5.157188 | 4.460221  |
| Mus_musc Mus_musc | 0        | 0        | 0        | 0        | 0        | 0         |
| Mus_musc Mus_musc | 0.216019 | 0.305383 | 0.697187 | 0.049539 | 0        | 0         |
| Mus_musc Mus_musc | 0.440191 | 0.301745 | 0.541042 | 0.401377 | 0.393956 | 0.614303  |
| Mus_musc Mus_musc | 0.100785 | 0        | 0.202723 | 0.257544 | 0.112015 | 0.323431  |
| ENSMUSG Negr1     | 0.658686 | 0.781549 | 0.430392 | 0.578055 | 0.522948 | 0.256928  |
| ENSMUSG Disp2     | 1.150554 | 0.780043 | 0.833358 | 1.192498 | 0.932786 | 1.06397   |
| ENSMUSG Nup43     | 2.440753 | 2.954255 | 2.612862 | 2.77932  | 2.647954 | 2.728849  |
| ENSMUSG Stat2     | 13.7091  | 12.71514 | 31.17546 | 18.83254 | 12.53014 | 13.770411 |
| ENSMUSG Olfr55    | 0        | 0        | 0        | 0        | 0        | 0         |
| ENSMUSG Vmn2r101  | 0        | 0        | 0        | 0        | 0        | 0         |
| ENSMUSG Gm4791    | 0        | 0        | 0        | 0        | 0        | 0         |
| ENSMUSG Cyp2d22   | 17.00462 | 14.32317 | 16.51279 | 9.139136 | 8.932477 | 7.897976  |
| ENSMUSG Slc22a12  | 0.371333 | 0.255388 | 0.331288 | 0.118109 | 0.309439 | 0.157054  |
| ENSMUSG D130043K  | 0.424218 | 0.497619 | 0.180113 | 0.442167 | 0.27589  | 0.282631  |
| Mus_musc Mus_musc | 0.142659 | 0.235901 | 0.143395 | 0.639991 | 0.647367 | 0.369024  |
| Mus_musc Mus_musc | 0        | 0        | 0        | 0.062205 | 0.342973 | 0.163767  |
| Mus_musc Mus_musc | 30.34352 | 32.34236 | 32.59525 | 30.71799 | 26.06199 | 27.554766 |
| Mus_musc Mus_musc | 54.51016 | 59.4205  | 61.60641 | 51.69141 | 54.39055 | 55.819412 |
| Mus_musc Mus_musc | 0        | 0        | 0        | 0        | 0        | 0         |
| ENSMUSG Fbxw5     | 16.1107  | 16.25407 | 16.21426 | 16.90699 | 15.09116 | 16.389799 |
| ENSMUSG Npdcc1    | 42.63845 | 42.463   | 44.96077 | 35.61808 | 35.72763 | 39.043639 |
| ENSMUSG Clic3     | 165.9103 | 136.875  | 148.5064 | 83.88544 | 79.35799 | 91.984726 |
| ENSMUSG Edf1      | 102.7618 | 101.3143 | 105.5606 | 111.5682 | 106.0203 | 112.09009 |
| ENSMUSG Ptgds     | 0.182397 | 0.711415 | 0.174186 | 0.106418 | 0.265845 | 0.262276  |
| ENSMUSG Gm13290   | 0        | 0.010383 | 0        | 0.006741 | 0.013693 | 0.015146  |
| ENSMUSG Btdb35f17 | 0        | 0        | 0        | 0        | 0        | 0         |
| ENSMUSG Usp34     | 15.92258 | 16.58084 | 13.45079 | 14.92876 | 14.38113 | 14.825599 |
| ENSMUSG Krtap3-1  | 0        | 0        | 0        | 0        | 0        | 0         |
| ENSMUSG Acot10    | 0.073402 | 0.142764 | 0.029786 | 0.135748 | 0.038505 | 0.03595   |
| ENSMUSG Mmp10     | 0        | 0        | 0        | 0        | 0        | 0         |
| ENSMUSG Zfp746    | 10.43065 | 10.89497 | 10.69109 | 8.519424 | 8.19124  | 8.184877  |
| ENSMUSG Vmn1r53   | 0        | 0        | 0        | 0        | 0        | 0         |
| ENSMUSG Tas2r131  | 0        | 0        | 0        | 0        | 0        | 0         |
| ENSMUSG Tarm1     | 0.063085 | 0.1678   | 0.402382 | 0.96649  | 0.991141 | 1.33123   |
| ENSMUSG Dis3l2    | 6.191458 | 5.578338 | 4.105133 | 4.368923 | 4.388948 | 5.062407  |
| ENSMUSG Fcfd      | 5.839357 | 6.535267 | 6.266814 | 5.336514 | 5.64582  | 5.513889  |
| ENSMUSG Phb       | 29.39656 | 29.62515 | 32.62825 | 25.14258 | 26.39847 | 29.115711 |
| ENSMUSG Kif16b    | 8.63485  | 9.124257 | 7.176183 | 7.737182 | 7.208846 | 7.337643  |
| ENSMUSG Birc7     | 0.059538 | 0        | 0        | 0        | 0        | 0         |
| ENSMUSG Gcnt1     | 1.643173 | 1.572155 | 1.647329 | 2.252402 | 2.408612 | 2.797184  |
| ENSMUSG Ythdf1    | 22.5301  | 20.64635 | 19.11847 | 17.55482 | 16.55585 | 17.233428 |
| ENSMUSG Kpna2     | 15.81432 | 16.31016 | 17.9684  | 17.84621 | 18.85032 | 19.555889 |
| ENSMUSG Smurf2    | 51.98581 | 55.83961 | 50.47431 | 39.45622 | 40.65444 | 40.923653 |
| ENSMUSG Mtrex     | 17.66559 | 19.72602 | 16.57082 | 16.0681  | 16.06026 | 15.424425 |
| ENSMUSG 4931406P  | 44.04271 | 42.59867 | 38.08596 | 27.31759 | 27.98134 | 27.348798 |
| ENSMUSG Fate1     | 0        | 0        | 0        | 0        | 0.045324 | 0         |
| ENSMUSG Adamtsl3  | 3.914008 | 3.406878 | 3.82441  | 2.292781 | 2.374387 | 2.098028  |
| ENSMUSG Sapcd2    | 0.180089 | 0.314107 | 0.341282 | 0.97407  | 1.031623 | 1.515134  |
| ENSMUSG Zfp869    | 11.77568 | 11.37735 | 11.60092 | 9.641918 | 10.67487 | 9.2999    |
| ENSMUSG Mmrrn1    | 3.058627 | 3.560977 | 3.077058 | 4.440719 | 4.61369  | 3.595513  |
| ENSMUSG Slc8a1    | 3.07783  | 2.157718 | 2.62802  | 2.943107 | 2.854266 | 2.57245   |
| ENSMUSG Zfp39     | 1.27755  | 1.344097 | 1.140254 | 1.401837 | 1.267444 | 1.108527  |
| ENSMUSG Tlnrd1    | 17.95091 | 15.82236 | 17.51999 | 14.18923 | 14.75173 | 14.857491 |
| ENSMUSG Scrt1     | 0        | 0        | 0        | 0        | 0.025574 | 0         |
| ENSMUSG Osr1      | 2.760193 | 2.700336 | 2.642948 | 3.026428 | 3.408166 | 2.926383  |

|                    |          |          |          |          |          |           |
|--------------------|----------|----------|----------|----------|----------|-----------|
| ENSMUSG Tns2       | 82.98561 | 75.31952 | 75.96829 | 35.75649 | 40.29898 | 35.897961 |
| ENSMUSG Gm21943    | 0        | 0        | 0        | 0        | 0        | 0         |
| ENSMUSG Szt2       | 5.853809 | 5.973334 | 5.300164 | 6.046783 | 5.936064 | 5.848094  |
| ENSMUSG Olfr291    | 0        | 0        | 0        | 0        | 0        | 0         |
| ENSMUSG Gm5134     | 0        | 0.058233 | 0.091254 | 0.221107 | 0.377463 | 0.238897  |
| ENSMUSG Fam171b    | 0.159395 | 0.206644 | 0.119435 | 0.166081 | 0.192844 | 0.187533  |
| ENSMUSG Ttll4      | 4.133473 | 4.667305 | 4.650285 | 4.406869 | 3.94752  | 3.677337  |
| ENSMUSG Shf        | 1.527862 | 1.742652 | 1.471353 | 1.172746 | 1.294514 | 1.80161   |
| ENSMUSG Lats2      | 44.41792 | 43.29963 | 43.41569 | 26.96504 | 27.49948 | 26.090225 |
| ENSMUSG Pinx1      | 2.783083 | 3.346068 | 4.373946 | 4.096435 | 3.483723 | 3.638354  |
| ENSMUSG Eef1akmt1  | 8.709488 | 8.635006 | 10.11918 | 9.630805 | 9.505186 | 11.837838 |
| ENSMUSG Anxa8      | 7.344378 | 11.44864 | 5.906295 | 20.86423 | 18.84357 | 21.509318 |
| ENSMUSG Tdh        | 0        | 0        | 0        | 0        | 0        | 0         |
| ENSMUSG Xpo4       | 4.434325 | 4.52941  | 4.096749 | 3.72843  | 3.53653  | 3.815848  |
| ENSMUSG Tkt        | 45.48069 | 44.18763 | 40.22996 | 56.27776 | 57.32281 | 65.201518 |
| ENSMUSG Pdxp       | 0.929892 | 0.741163 | 0.824588 | 0.261423 | 0.517123 | 0.812473  |
| ENSMUSG Gm49403    | 0        | 0        | 0        | 0        | 0        | 0         |
| ENSMUSG Olfr718-ps | 0        | 0        | 0        | 0        | 0        | 0         |
| ENSMUSG Lrrc73     | 0.50834  | 1.400395 | 0.994622 | 0.778398 | 0.896309 | 1.201792  |
| ENSMUSG Ptges3     | 37.16841 | 47.51191 | 46.83042 | 39.97051 | 37.62202 | 40.079483 |
| ENSMUSG Jund       | 150.492  | 101.0115 | 114.4512 | 90.90101 | 100.5378 | 112.37449 |
| ENSMUSG Yipf3      | 30.84927 | 32.32468 | 32.37092 | 33.78976 | 32.53575 | 33.467209 |
| ENSMUSG Nr2c2ap    | 4.069772 | 4.024245 | 4.343996 | 4.237115 | 4.270922 | 5.858585  |
| ENSMUSG Aldh3a1    | 8.864775 | 12.97402 | 6.129312 | 6.357032 | 6.213204 | 4.957331  |
| ENSMUSG Vmn2r90    | 0        | 0        | 0        | 0        | 0        | 0         |
| ENSMUSG Iqce       | 3.872423 | 3.954503 | 3.562194 | 4.347515 | 3.908893 | 4.265054  |
| ENSMUSG Stpg4      | 0        | 0.078521 | 0        | 0        | 0        | 0         |
| ENSMUSG Akap14     | 1.444825 | 1.893719 | 0.934527 | 1.966179 | 2.137526 | 1.921852  |
| ENSMUSG Cnot1      | 24.40781 | 24.7831  | 21.37282 | 24.35174 | 23.95206 | 24.76065  |
| ENSMUSG Sh3tc1     | 16.97493 | 14.76482 | 16.82786 | 12.01445 | 12.94132 | 13.866359 |
| ENSMUSG Ermard     | 6.124177 | 3.793279 | 6.833877 | 6.883646 | 6.396761 | 6.791301  |
| ENSMUSG Gm8180     | 0        | 0        | 0        | 0        | 0        | 0         |
| ENSMUSG Cyp4f17    | 2.046744 | 2.086052 | 2.607035 | 2.357595 | 3.139199 | 2.935883  |
| ENSMUSG Nod2       | 0.52238  | 0.776451 | 1.584997 | 1.845122 | 1.336618 | 1.594381  |
| Mus_musc Mus_musc  | 0        | 0        | 0.168936 | 0        | 0        | 0.212253  |
| ENSMUSG Zkscan5    | 2.935828 | 3.486302 | 3.370928 | 2.89681  | 3.385251 | 3.014164  |
| ENSMUSG Mtx2       | 5.316828 | 5.12822  | 4.517725 | 5.47738  | 6.816422 | 5.540603  |
| ENSMUSG Lrrc71     | 1.228525 | 1.290342 | 1.352809 | 1.891078 | 1.64478  | 1.915543  |
| ENSMUSG Noct       | 1.315622 | 1.333448 | 1.88027  | 1.323043 | 1.985908 | 1.433636  |
| ENSMUSG Rnf141     | 53.25361 | 48.70028 | 44.05119 | 33.33631 | 30.84462 | 31.57395  |
| ENSMUSG Itgax      | 13.97015 | 12.16023 | 14.55602 | 85.60147 | 92.43447 | 93.517666 |
| ENSMUSG Itgam      | 5.280033 | 3.874684 | 6.939831 | 11.95492 | 9.357817 | 14.129259 |
| ENSMUSG Lyve1      | 116.78   | 81.14136 | 84.14069 | 62.64161 | 105.2385 | 60.04026  |
| ENSMUSG Cox6a2     | 6.939306 | 15.41701 | 9.107035 | 7.480145 | 7.045993 | 7.438416  |
| ENSMUSG Ndufa5     | 16.83029 | 21.58884 | 19.01002 | 18.87746 | 15.89745 | 13.80296  |
| ENSMUSG Abcc1      | 5.743262 | 5.245011 | 4.879852 | 5.024212 | 4.713924 | 5.006301  |
| ENSMUSG BC017158   | 8.047027 | 8.302443 | 8.774572 | 8.639667 | 8.551519 | 7.884333  |
| ENSMUSG Slc5a2     | 0        | 0        | 0        | 0.008641 | 0        | 0         |
| ENSMUSG Asb13      | 8.481409 | 7.851297 | 9.115591 | 7.254698 | 6.464154 | 6.132579  |
| ENSMUSG Vmn1r113   | 0        | 0        | 0        | 0        | 0        | 0         |
| ENSMUSG Vmn2r95    | 0        | 0        | 0        | 0        | 0        | 0         |
| ENSMUSG Dysf       | 4.59742  | 4.563733 | 5.125988 | 3.64033  | 3.402752 | 3.636562  |
| ENSMUSG Akain1     | 0        | 0        | 0        | 0        | 0        | 0         |
| ENSMUSG Vmn2r13    | 0        | 0        | 0        | 0.012299 | 0        | 0         |
| ENSMUSG Kcnk3      | 10.12563 | 9.151134 | 10.83399 | 6.489876 | 6.743066 | 5.352324  |
| ENSMUSG Nkpd1      | 0.067062 | 0.1215   | 0        | 0.030793 | 0.085407 | 0.056237  |
| ENSMUSG Csf3       | 0        | 0        | 0        | 0        | 0        | 0         |
| ENSMUSG Mturn      | 16.68987 | 17.86775 | 13.03357 | 10.16185 | 10.53088 | 9.439936  |
| ENSMUSG Cldn22     | 0        | 0        | 0        | 0        | 0        | 0.000376  |
| ENSMUSG Dlec1      | 1.271225 | 1.634772 | 0.915259 | 2.299853 | 2.033203 | 2.273772  |
| ENSMUSG Cdkn2aip   | 6.86301  | 7.147567 | 6.497126 | 5.696138 | 6.608222 | 6.384749  |
| ENSMUSG Rnf144b    | 13.9417  | 12.4694  | 12.21625 | 11.25295 | 12.14058 | 12.115197 |
| ENSMUSG Prf1       | 3.947008 | 2.120658 | 18.64549 | 4.252178 | 2.296878 | 3.060663  |
| ENSMUSG Islr       | 5.076173 | 4.614079 | 5.608028 | 4.775346 | 4.144653 | 4.933561  |

|                          |          |          |          |          |          |           |
|--------------------------|----------|----------|----------|----------|----------|-----------|
| ENSMUSG Sspn             | 10.41361 | 10.06832 | 8.476186 | 7.094152 | 6.292467 | 6.758289  |
| ENSMUSG Atg101           | 18.3678  | 18.03738 | 20.22766 | 16.03327 | 17.65318 | 17.683032 |
| ENSMUSG Srgap3           | 0.843232 | 1.037399 | 0.92855  | 1.157471 | 1.169196 | 1.145155  |
| ENSMUSG Rassf8           | 24.758   | 25.55793 | 24.86877 | 17.12194 | 16.71203 | 17.531561 |
| ENSMUSG Adgrg1           | 26.70546 | 25.43938 | 25.70623 | 22.013   | 22.49916 | 24.735254 |
| ENSMUSG Katnb1           | 4.313935 | 4.242795 | 4.802397 | 4.568953 | 5.113143 | 4.488083  |
| ENSMUSG Drc7             | 3.250448 | 3.545762 | 2.31285  | 3.586748 | 3.611561 | 4.16949   |
| ENSMUSG Ciapin1          | 11.09867 | 10.87012 | 10.28076 | 8.546898 | 8.29247  | 6.699035  |
| ENSMUSG Ccl17            | 3.314694 | 1.235375 | 2.016059 | 7.834451 | 13.81233 | 8.139313  |
| ENSMUSG Polr2c           | 22.51843 | 22.42127 | 23.15699 | 19.57157 | 18.03677 | 19.413165 |
| ENSMUSG Coq9             | 11.85847 | 15.64471 | 13.05084 | 16.27126 | 16.67184 | 17.277467 |
| ENSMUSG Cngb1            | 0.560728 | 0.48335  | 0.284112 | 0.725569 | 0.688102 | 0.840095  |
| ENSMUSG Kifc3            | 40.45863 | 42.04266 | 41.85325 | 27.57507 | 27.46144 | 27.628503 |
| ENSMUSG Gm1673           | 0.889654 | 1.580046 | 1.707529 | 2.325708 | 1.788604 | 1.91785   |
| ENSMUSG Olfr1121         | 0        | 0        | 0        | 0        | 0        | 0         |
| ENSMUSG Olfr1150- $\mu$  | 0        | 0        | 0        | 0        | 0        | 0         |
| ENSMUSG Olfr1115         | 0        | 0        | 0        | 0        | 0        | 0         |
| ENSMUSG Olfr1113         | 0        | 0        | 0        | 0        | 0        | 0         |
| ENSMUSG Olfr1116         | 0        | 0        | 0        | 0        | 0        | 0         |
| ENSMUSG Tmem189          | 26.87445 | 25.37441 | 27.18935 | 29.49114 | 30.53602 | 32.579571 |
| ENSMUSG Itga10           | 0.279794 | 0.299507 | 0.285214 | 0.187471 | 0.273754 | 0.266436  |
| ENSMUSG 3830403N         | 0        | 0.239315 | 0.045953 | 0.243486 | 0.172627 | 0.149764  |
| ENSMUSG Trim34b          | 4.232102 | 5.18563  | 5.080724 | 3.48759  | 4.147578 | 3.312779  |
| ENSMUSG Slc9a9           | 2.3929   | 1.84715  | 2.278787 | 2.442197 | 2.540588 | 2.841158  |
| ENSMUSG 4930516K $\zeta$ | 0        | 0        | 0        | 0        | 0        | 0         |
| ENSMUSG Pla2g3           | 0.119943 | 0.109191 | 0.164987 | 0.404496 | 0.219023 | 0.294038  |
| ENSMUSG Inpp5j           | 0.411723 | 0.43354  | 0.227036 | 1.3716   | 1.282797 | 1.437425  |
| ENSMUSG Ptpn13           | 13.56997 | 16.84165 | 11.43638 | 10.62628 | 10.29917 | 11.387705 |
| ENSMUSG Tent4a           | 8.281286 | 8.476574 | 8.066066 | 6.094096 | 6.312873 | 5.558525  |
| ENSMUSG Daam1            | 24.82064 | 26.90863 | 22.62428 | 18.67641 | 19.61131 | 17.815765 |
| ENSMUSG Spata16          | 0        | 0        | 0        | 0        | 0        | 0         |
| ENSMUSG Morc2b           | 0        | 0        | 0        | 0        | 0        | 0         |
| ENSMUSG Tex19.2          | 0        | 0        | 0        | 0.025516 | 0        | 0         |
| ENSMUSG Tsga10ip         | 0.115833 | 0.047528 | 0.109273 | 0.107197 | 0        | 0         |
| ENSMUSG Mfsd4b2          | 0        | 0.020259 | 0.02218  | 0.020486 | 0.024429 | 0         |
| ENSMUSG Npsr1            | 0        | 0        | 0        | 0        | 0        | 0         |
| ENSMUSG Cd200r4          | 4.105861 | 2.75669  | 4.564793 | 5.62105  | 6.818374 | 5.655279  |
| ENSMUSG Rpl13a-ps        | 0        | 0.037821 | 0.04113  | 0.085302 | 0        | 0         |
| ENSMUSG Tmem47           | 13.12467 | 12.2983  | 11.57369 | 8.180829 | 8.372302 | 7.387958  |
| ENSMUSG Rps6ka6          | 0.714795 | 0.575053 | 0.480841 | 0.247754 | 0.356951 | 0.449409  |
| ENSMUSG Nrde2            | 4.258291 | 4.020966 | 4.587175 | 3.958314 | 3.909388 | 4.155043  |
| ENSMUSG Psmc1            | 62.85846 | 68.33976 | 69.29342 | 57.89096 | 57.2306  | 56.439133 |
| ENSMUSG Esyt2            | 27.79562 | 25.96925 | 25.17117 | 20.20415 | 22.19565 | 21.722256 |
| ENSMUSG Tdp1             | 5.599052 | 5.69638  | 5.647264 | 5.446987 | 5.431778 | 6.263836  |
| ENSMUSG Efcab11          | 0.363523 | 0.404428 | 0.401881 | 1.059488 | 0.389183 | 0.715993  |
| ENSMUSG Cdca7l           | 1.513553 | 1.057786 | 1.756017 | 1.962589 | 1.615371 | 1.905229  |
| ENSMUSG Fthl17e          | 0        | 0        | 0        | 0        | 0        | 0         |
| ENSMUSG Ssxb5            | 0        | 0        | 0        | 0        | 0        | 0         |
| ENSMUSG Col4a3bp         | 24.3961  | 23.30297 | 21.63902 | 19.41024 | 21.26911 | 20.057157 |
| ENSMUSG Myl12a           | 183.4483 | 165.3538 | 179.4346 | 112.5433 | 100.8217 | 99.457156 |
| ENSMUSG Obox2            | 0        | 0        | 0        | 0        | 0        | 0         |
| ENSMUSG C5ar2            | 0.397449 | 0.5218   | 0.659855 | 0.413498 | 0.41264  | 0.284142  |
| ENSMUSG Sik1             | 36.12093 | 23.5576  | 30.01292 | 12.69469 | 16.8912  | 14.660242 |
| ENSMUSG Arhgap28         | 2.751735 | 3.136656 | 2.678663 | 2.587422 | 3.024113 | 2.440663  |
| ENSMUSG Epb41l3          | 11.89082 | 8.108662 | 8.23398  | 5.187254 | 3.869959 | 4.390418  |
| ENSMUSG Akap8            | 23.69378 | 22.51272 | 25.61681 | 19.21568 | 18.93768 | 19.430992 |
| ENSMUSG Obox5            | 0        | 0        | 0        | 0        | 0        | 0         |
| ENSMUSG Obp2b            | 0        | 0        | 0        | 0        | 0        | 0         |
| ENSMUSG N6amt1           | 5.066942 | 4.331873 | 4.269988 | 5.151329 | 3.878568 | 3.832099  |
| ENSMUSG Mkrn2os          | 0.077043 | 0.110301 | 0.046809 | 0.143307 | 0.469056 | 0.169348  |
| ENSMUSG Olfr1442         | 0        | 0        | 0        | 0        | 0        | 0         |
| ENSMUSG Dock5            | 5.697294 | 5.577281 | 5.317714 | 4.252132 | 3.874614 | 4.782604  |
| ENSMUSG Pfn3             | 0        | 0        | 0        | 0        | 0        | 0         |
| ENSMUSG Ttc19            | 4.83757  | 5.351726 | 4.577163 | 4.79155  | 4.506364 | 4.397133  |

|                   |          |          |          |          |          |           |
|-------------------|----------|----------|----------|----------|----------|-----------|
| ENSMUSG Gm5617    | 4.652981 | 6.895677 | 6.880251 | 10.99317 | 7.618525 | 8.321334  |
| ENSMUSG Mkl1      | 9.643881 | 8.324953 | 9.97509  | 9.95276  | 10.47378 | 10.588103 |
| ENSMUSG 493058310 | 0        | 0        | 0        | 0        | 0        | 0         |
| ENSMUSG Irf2bpl   | 30.22055 | 32.48489 | 30.70503 | 22.18799 | 22.77956 | 24.045294 |
| ENSMUSG S1pr4     | 11.07455 | 9.428063 | 11.88982 | 9.587735 | 8.441921 | 8.085823  |
| ENSMUSG Gpr146    | 52.25568 | 35.63409 | 45.95371 | 27.06526 | 24.85786 | 25.398968 |
| ENSMUSG Rnf169    | 5.294478 | 5.815842 | 5.142698 | 4.576063 | 4.877119 | 4.515101  |
| ENSMUSG Olfr1314  | 0        | 0        | 0.034363 | 0        | 0        | 0         |
| ENSMUSG Olfr1313  | 0        | 0        | 0        | 0        | 0        | 0         |
| ENSMUSG Acot7     | 39.03809 | 35.94418 | 36.14544 | 44.34831 | 43.96654 | 61.99377  |
| ENSMUSG Cldn13    | 0        | 0.043386 | 0.094997 | 0        | 0.052491 | 0         |
| ENSMUSG Ltbp1     | 8.244087 | 7.156419 | 9.490904 | 7.851323 | 8.323496 | 7.569673  |
| Mus_musc Mus_musc | 0.106881 | 0        | 0        | 0        | 0        | 0         |
| Mus_musc Mus_musc | 0        | 0        | 0        | 0        | 0        | 0         |
| ENSMUSG Impa1     | 11.33749 | 11.37339 | 12.42628 | 11.42481 | 10.76453 | 12.396063 |
| ENSMUSG Fabp12    | 0.555793 | 0.802799 | 0.645764 | 0.447417 | 0.623321 | 0.492038  |
| ENSMUSG Fabp5     | 24.64965 | 25.07909 | 24.41513 | 70.61256 | 71.25964 | 95.170082 |
| Mus_musc Mus_musc | 0        | 0        | 0        | 0.174016 | 0        | 0         |
| ENSMUSG Gm10801   | 0        | 0        | 0        | 0        | 0        | 0         |
| ENSMUSG Gm10800   | 0        | 0        | 0.226095 | 0        | 0        | 0         |
| ENSMUSG Chmp4c    | 6.574169 | 6.672084 | 6.166029 | 4.557057 | 4.480493 | 3.834061  |
| ENSMUSG Copz2     | 13.02888 | 10.16025 | 11.79217 | 9.803653 | 9.829813 | 10.214023 |
| ENSMUSG Atp4a     | 0        | 0        | 0        | 0        | 0.048213 | 0         |
| ENSMUSG Snx17     | 47.93483 | 44.37688 | 46.20055 | 38.81716 | 38.54949 | 41.359617 |
| ENSMUSG Dok4      | 27.45243 | 26.23432 | 28.94628 | 17.20242 | 18.94232 | 18.169103 |
| ENSMUSG Nrl       | 0        | 0        | 0        | 0        | 0        | 0         |
| Mus_musc Mus_musc | 0.493582 | 0.348577 | 0.205482 | 0.493134 | 0.084801 | 0.644183  |
| Mus_musc Mus_musc | 0        | 0        | 0.106287 | 0        | 0.329457 | 0         |
| ENSMUSG Myh13     | 0.051684 | 0.05287  | 0.031212 | 0.746997 | 0.156188 | 0.400081  |
| Mus_musc Mus_musc | 0        | 0        | 0.097652 | 4.237084 | 0.9004   | 3.197393  |
| ENSMUSG Las1l     | 17.5446  | 18.07184 | 19.40112 | 15.91033 | 14.39668 | 15.79883  |
| ENSMUSG Tnfrsf11a | 1.070025 | 1.227905 | 1.28085  | 3.092257 | 2.835072 | 3.195194  |
| ENSMUSG Olfr657   | 0        | 0        | 0        | 0        | 0        | 0         |
| Mus_musc Mus_musc | 0        | 0.183167 | 0        | 0.426816 | 0.340907 | 0.448444  |
| ENSMUSG Olfr934   | 0        | 0        | 0        | 0        | 0        | 0         |
| ENSMUSG Gm4767    | 0.670777 | 0.859657 | 0.703806 | 0.526889 | 0.438419 | 0.58985   |
| ENSMUSG Ugt2b37   | 0        | 0        | 0        | 0        | 0        | 0         |
| ENSMUSG Olfr661   | 0        | 0        | 0        | 0        | 0        | 0         |
| ENSMUSG Gm37013   | 0        | 0        | 0        | 0        | 0        | 0         |
| ENSMUSG Abhd17b   | 13.41405 | 14.41623 | 12.65069 | 11.83626 | 11.5139  | 11.691696 |
| ENSMUSG Dnah14    | 0.012933 | 0.00952  | 0.008055 | 0.010114 | 0.009037 | 0         |
| ENSMUSG Cstad     | 0.210301 | 0.112293 | 0.10788  | 0.372042 | 0        | 0.204426  |
| ENSMUSG Gm973     | 2.528575 | 3.114674 | 1.666119 | 3.703889 | 4.154129 | 2.933054  |
| ENSMUSG Aida      | 13.74913 | 13.25532 | 17.56932 | 13.06534 | 12.0289  | 12.01791  |
| ENSMUSG Foxo4     | 22.75011 | 23.68189 | 21.83676 | 19.34116 | 18.96415 | 16.790596 |
| ENSMUSG Vars      | 14.62485 | 13.04178 | 13.8329  | 21.55268 | 17.56556 | 20.555021 |
| ENSMUSG Nifk      | 10.997   | 11.42379 | 10.93904 | 11.26954 | 9.715908 | 12.876218 |
| ENSMUSG Olfr648   | 0        | 0        | 0        | 0        | 0        | 0         |
| ENSMUSG Syngn3    | 0.107078 | 0.140802 | 0        | 0.024176 | 0        | 0.055865  |
| ENSMUSG Olfr651   | 0        | 0        | 0        | 0        | 0        | 0         |
| Mus_musc Mus_musc | 0.344991 | 0.273393 | 0.255563 | 0        | 0.073786 | 0         |
| Mus_musc Mus_musc | 2.377827 | 1.768647 | 2.348959 | 1.35995  | 1.377599 | 1.275668  |
| Mus_musc Mus_musc | 0.094753 | 0.184722 | 0.227014 | 0.251768 | 0.253174 | 0.105397  |
| Mus_musc Mus_musc | 0        | 0.175071 | 0.168936 | 0        | 0        | 0         |
| Mus_musc Mus_musc | 0.050323 | 0        | 0        | 0        | 0.467237 | 0.065281  |
| Mus_musc Mus_musc | 0        | 0        | 0        | 0.348032 | 0        | 0         |
| Mus_musc Mus_musc | 0        | 0        | 0        | 0        | 0        | 0         |
| Mus_musc Mus_musc | 0.094443 | 0        | 0        | 0        | 0        | 0.251163  |
| ENSMUSG Mapk4     | 0.238622 | 0.17518  | 0.22947  | 0.13563  | 0.134025 | 0.231696  |
| ENSMUSG CK137956  | 0        | 0        | 0        | 0        | 0        | 0         |
| ENSMUSG Olfr1269  | 0        | 0        | 0        | 0        | 0        | 0         |
| ENSMUSG Zfp831    | 0.348875 | 0.179925 | 0.276823 | 0.587134 | 0.486729 | 0.572786  |
| ENSMUSG Vmn2r82   | 0        | 0        | 0        | 0.008755 | 0        | 0         |
| ENSMUSG Zfp61     | 2.527923 | 2.787398 | 2.98094  | 2.634485 | 3.038267 | 2.505713  |

|                   |          |          |          |          |          |           |
|-------------------|----------|----------|----------|----------|----------|-----------|
| ENSMUSG Rasl2-9   | 0        | 0.091397 | 0        | 0.234827 | 0.099336 | 0.054547  |
| ENSMUSG Ccdc166   | 2.794202 | 2.785795 | 2.907872 | 2.27615  | 2.447867 | 2.719775  |
| ENSMUSG Il17c     | 0.034089 | 0.226014 | 0.069119 | 0.161431 | 0.225641 | 0.17189   |
| ENSMUSG Mcmdc2    | 0        | 0        | 0        | 0        | 0        | 0.034241  |
| Mus_musc Mus_musc | 0.225232 | 0.217587 | 0.19932  | 0.075115 | 0.11994  | 0.12681   |
| Mus_musc Mus_musc | 0.365536 | 0.569964 | 0.566668 | 0.399053 | 0.270804 | 0.496615  |
| ENSMUSG Ctsz      | 84.24137 | 84.61688 | 99.0794  | 252.6734 | 265.6361 | 305.28818 |
| ENSMUSG Prelid3b  | 18.08788 | 16.98886 | 19.90833 | 17.17304 | 17.61305 | 19.888712 |
| Mus_musc Mus_musc | 0        | 0        | 0        | 0        | 0        | 0.195046  |
| ENSMUSG Atp5e     | 73.57523 | 83.09737 | 77.98498 | 100.6051 | 85.99001 | 96.546188 |
| ENSMUSG Nelfcd    | 12.67672 | 12.48698 | 14.05431 | 14.26727 | 12.04791 | 12.679716 |
| ENSMUSG Krt23     | 12.18221 | 11.14226 | 10.39242 | 12.45667 | 12.2766  | 14.995174 |
| Mus_musc Mus_musc | 0.761824 | 0.913389 | 0.850496 | 0.711984 | 0.701961 | 0.919712  |
| Mus_musc Mus_musc | 0.274037 | 0.053974 | 0.204541 | 0.127586 | 0.110508 | 0.334509  |
| Mus_musc Mus_musc | 0        | 0.154309 | 0        | 0        | 0        | 0         |
| Mus_musc Mus_musc | 0        | 0        | 0        | 0        | 0        | 0         |
| Mus_musc Mus_musc | 0.206637 | 0        | 0        | 0.178412 | 0        | 0         |
| Mus_musc Mus_musc | 2.016931 | 1.487002 | 1.769838 | 0.758058 | 0.868248 | 1.091441  |
| Mus_musc Mus_musc | 0.72593  | 0.519516 | 0.797131 | 0.260512 | 0.456515 | 0         |
| ENSMUSG Kik8      | 5.658309 | 5.232847 | 4.483587 | 3.518891 | 3.621867 | 4.371901  |
| ENSMUSG Cse1l     | 15.35101 | 15.34628 | 15.01076 | 15.71395 | 16.08756 | 15.438062 |
| Mus_musc Mus_musc | 0        | 0        | 0        | 0        | 0        | 0         |
| Mus_musc Mus_musc | 0        | 0.054875 | 0.131445 | 0        | 1.850145 | 0         |
| Mus_musc Mus_musc | 0.458958 | 0        | 0.294639 | 0        | 0.503312 | 0.245186  |
| Mus_musc Mus_musc | 0        | 0.308619 | 0        | 0        | 0        | 0         |
| ENSMUSG Gm17577   | 0        | 0        | 0        | 0        | 0        | 0         |
| ENSMUSG Olfr1513  | 0        | 0        | 0        | 0        | 0        | 0         |
| ENSMUSG Gm21310   | 0        | 0        | 0        | 0        | 0        | 0         |
| ENSMUSG Cyp51     | 7.472296 | 7.727677 | 9.06858  | 12.16186 | 10.14659 | 14.493979 |
| Mus_musc Mus_musc | 0        | 0.209654 | 0.209501 | 0.088859 | 0.108951 | 0         |
| ENSMUSG Gm6096    | 0        | 0.063619 | 0.155229 | 0.154172 | 0.218627 | 0.211653  |
| Mus_musc Mus_musc | 0        | 0        | 0        | 0.867202 | 1.145587 | 0.796241  |
| ENSMUSG Gm5142    | 0        | 0        | 0        | 0        | 0        | 0         |
| ENSMUSG Gm9925    | 0.158834 | 0        | 0.052465 | 0.122496 | 0        | 0.032414  |
| ENSMUSG Slc51b    | 0.365001 | 0.318149 | 0.284566 | 0.103354 | 0.033671 | 0.141619  |
| ENSMUSG Mepe      | 0        | 0        | 0        | 0        | 0        | 0         |
| ENSMUSG Mfsd7a    | 1.244021 | 1.264007 | 1.646387 | 1.71213  | 1.647552 | 1.957016  |
| ENSMUSG Myh9      | 142.4791 | 122.3871 | 133.6079 | 109.6195 | 109.2349 | 118.29615 |
| Mus_musc Mus_musc | 0.433228 | 0.360815 | 0.415995 | 0.081722 | 0.233595 | 0         |
| Mus_musc Mus_musc | 0.619079 | 0.436274 | 0.575151 | 0.456133 | 0.44297  | 0.734512  |
| ENSMUSG Capns1    | 167.3653 | 162.0568 | 169.9123 | 129.221  | 120.7458 | 137.80805 |
| ENSMUSG Tnfaip1   | 49.34665 | 45.33836 | 44.37475 | 38.03468 | 36.78559 | 42.107317 |
| ENSMUSG Gm3149    | 0        | 0        | 0        | 0        | 0        | 0         |
| ENSMUSG 2610042LC | 0        | 0        | 0.028037 | 0        | 0.014848 | 0         |
| ENSMUSG Luzp4     | 0        | 0        | 0        | 0        | 0        | 0         |
| ENSMUSG Gm3173    | 0.264113 | 0        | 0        | 0        | 0        | 0         |
| ENSMUSG Gm8271    | 0        | 0        | 0        | 0        | 0.037025 | 0         |
| ENSMUSG Gm3298    | 0        | 0        | 0        | 0        | 0        | 0         |
| ENSMUSG Gm3443    | 0        | 0        | 0        | 0        | 0        | 0         |
| Mus_musc Mus_musc | 0.036559 | 0.103808 | 0.480393 | 0.140479 | 0.085539 | 0.529787  |
| Mus_musc Mus_musc | 8.427304 | 7.430126 | 7.003777 | 5.96716  | 5.343558 | 6.474557  |
| Mus_musc Mus_musc | 6.613285 | 7.970759 | 10.33913 | 7.076321 | 5.35497  | 7.18184   |
| Mus_musc Mus_musc | 0.272973 | 0.292987 | 0.127793 | 0.201896 | 0.316654 | 0.181395  |
| Mus_musc Mus_musc | 0        | 0        | 0.252231 | 0.158065 | 0.268111 | 0         |
| Mus_musc Mus_musc | 0        | 0        | 0        | 0.174016 | 0        | 0         |
| Mus_musc Mus_musc | 0        | 0.172335 | 0.250713 | 0.139213 | 0.21106  | 0.244495  |
| Mus_musc Mus_musc | 0.487291 | 0.437568 | 0.451732 | 0.383245 | 0.540888 | 0.491426  |
| ENSMUSG Tgtp1     | 7.325267 | 5.913688 | 81.88875 | 49.10821 | 8.240083 | 10.655579 |
| ENSMUSG Ube2v1    | 59.62656 | 49.46237 | 50.21268 | 45.35482 | 46.17877 | 48.98104  |
| ENSMUSG Ifi47     | 20.32642 | 16.53675 | 115.5921 | 62.89635 | 17.98463 | 22.336965 |
| ENSMUSG Tgtp2     | 14.57029 | 11.78905 | 131.7942 | 85.19051 | 12.45261 | 17.991735 |
| ENSMUSG Cdc20b    | 0.388482 | 0.14145  | 0.616826 | 1.382946 | 0.7101   | 1.407187  |
| ENSMUSG Tex14     | 0.164108 | 0.137592 | 0.152313 | 0.093305 | 0.152356 | 0.087124  |
| ENSMUSG Adprh     | 12.93353 | 11.50041 | 13.36427 | 11.9282  | 12.6621  | 12.852859 |

|                   |          |          |          |          |          |           |
|-------------------|----------|----------|----------|----------|----------|-----------|
| ENSMUSG Tmem39a   | 7.015621 | 7.581498 | 7.675083 | 7.474118 | 8.646613 | 9.016013  |
| ENSMUSG Timmdc1   | 7.558254 | 8.057386 | 6.515749 | 7.039689 | 7.969021 | 7.854086  |
| ENSMUSG Pla1a     | 0.386827 | 0.510378 | 0.569967 | 0.400396 | 0.146781 | 0.429022  |
| ENSMUSG Rab5b     | 55.41084 | 57.60943 | 53.50395 | 49.56649 | 48.79756 | 50.892159 |
| ENSMUSG Gm7356    | 0        | 0        | 0        | 0        | 0        | 0         |
| ENSMUSG Prnp      | 69.03312 | 69.49098 | 68.06652 | 57.66604 | 53.35963 | 58.317207 |
| ENSMUSG Alkbh1    | 3.185676 | 3.341309 | 3.982901 | 3.629572 | 3.402127 | 4.020828  |
| ENSMUSG Gm45826   | 0        | 0        | 0        | 0        | 0        | 0         |
| ENSMUSG Mef2b     | 0.771343 | 0.436069 | 0.560561 | 1.285359 | 1.755645 | 1.665636  |
| ENSMUSG BB287469  | 0        | 0        | 0.011713 | 0        | 0        | 0         |
| ENSMUSG Gm11037   | 0.717653 | 0.048865 | 1.095269 | 0.060906 | 0.538296 | 0.420559  |
| ENSMUSG D130040H  | 0.681178 | 0.388896 | 0.460229 | 0.793903 | 0.735849 | 0.898431  |
| Mus_musc Mus_musc | 0        | 0.271512 | 0.048055 | 0        | 0        | 0         |
| Mus_musc Mus_musc | 0        | 0        | 0        | 0.390303 | 0.998243 | 0.307595  |
| Mus_musc Mus_musc | 0        | 0        | 0        | 0.156821 | 0.27229  | 0.160526  |
| Mus_musc Mus_musc | 0        | 0        | 0        | 0.162415 | 0        | 0.15575   |
| Mus_musc Mus_musc | 0        | 0        | 0        | 0        | 0        | 0         |
| Mus_musc Mus_musc | 0.327243 | 0.450856 | 0.817099 | 0.44964  | 0.189232 | 0.249758  |
| Mus_musc Mus_musc | 5.977398 | 6.210496 | 7.990139 | 5.636725 | 3.48261  | 4.259675  |
| ENSMUSG Atrn1     | 19.09088 | 19.97719 | 16.57749 | 12.88061 | 13.86363 | 14.052768 |
| ENSMUSG Phf8      | 8.568216 | 8.508982 | 7.851793 | 7.945667 | 7.924325 | 7.186807  |
| ENSMUSG Arhgap12  | 8.793846 | 10.05819 | 8.556646 | 8.517873 | 8.601475 | 8.456503  |
| ENSMUSG Elovl6    | 1.574536 | 2.219255 | 1.440151 | 1.892128 | 1.803914 | 1.563656  |
| ENSMUSG Gm4881    | 0        | 0        | 0        | 0        | 0        | 0         |
| ENSMUSG Abo       | 0        | 0        | 0        | 0        | 0        | 0         |
| ENSMUSG Gm10358   | 0        | 0.012304 | 0        | 0        | 0.004481 | 0         |
| Mus_musc Mus_musc | 0        | 0        | 0.437189 | 0        | 0        | 0         |
| ENSMUSG Olfr1178  | 0        | 0        | 0        | 0        | 0        | 0         |
| Mus_musc Mus_musc | 0        | 0        | 0.066657 | 0        | 0        | 0         |
| Mus_musc Mus_musc | 1.231953 | 1.644468 | 1.412408 | 0.663275 | 0.861982 | 0.758267  |
| Mus_musc Mus_musc | 0        | 0.036958 | 0.082825 | 0        | 0.311767 | 0.353501  |
| Mus_musc Mus_musc | 0        | 0        | 0.168936 | 0        | 0        | 0.152958  |
| ENSMUSG Rbm26     | 12.85093 | 13.37157 | 12.8278  | 11.43819 | 10.44808 | 11.84145  |
| Mus_musc Mus_musc | 0        | 0        | 0        | 0.229719 | 0        | 0         |
| ENSMUSG Rtp3      | 7.85786  | 10.195   | 9.713514 | 7.928651 | 6.727792 | 5.660714  |
| ENSMUSG Sucla2    | 24.52086 | 27.25364 | 26.15066 | 22.75173 | 23.10454 | 21.876158 |
| ENSMUSG Uchl3     | 6.666352 | 6.843454 | 7.315556 | 11.26751 | 9.354182 | 11.055281 |
| ENSMUSG Gpc5      | 0        | 0.026978 | 0        | 0        | 0        | 0.03402   |
| ENSMUSG Trim52    | 0        | 0        | 0        | 0        | 0        | 0         |
| ENSMUSG Spry2     | 24.22032 | 20.1981  | 20.78097 | 12.72507 | 12.11461 | 11.308701 |
| ENSMUSG Slain1    | 3.23765  | 2.516971 | 2.584965 | 3.980819 | 4.262788 | 4.422046  |
| ENSMUSG Fmo2      | 400.1715 | 418.8417 | 374.061  | 224.6848 | 249.7661 | 195.33182 |
| ENSMUSG Gm4353    | 3.131948 | 2.126281 | 1.132382 | 2.676991 | 3.277115 | 2.222167  |
| ENSMUSG Gm6460    | 0        | 0        | 0        | 0.366423 | 0.325086 | 0.090059  |
| ENSMUSG Plagl2    | 6.96036  | 7.258697 | 7.099846 | 8.471472 | 8.019954 | 7.986481  |
| ENSMUSG Olfr829   | 0        | 0        | 0        | 0        | 0        | 0         |
| Mus_musc Mus_musc | 0.792412 | 1.396884 | 1.200785 | 1.078291 | 1.150655 | 1.054743  |
| ENSMUSG Olfr1276  | 0        | 0        | 0        | 0        | 0        | 0         |
| Mus_musc Mus_musc | 0        | 0        | 0        | 0        | 0.186732 | 0         |
| ENSMUSG Gm21731   | 0        | 0        | 0        | 0        | 0        | 0         |
| Mus_musc Mus_musc | 5.700692 | 6.415677 | 6.416881 | 7.812024 | 6.734704 | 6.556051  |
| Mus_musc Mus_musc | 0.146247 | 0        | 0        | 0.058005 | 0        | 0         |
| Mus_musc Mus_musc | 0        | 0.251509 | 0        | 0        | 0        | 0         |
| Mus_musc Mus_musc | 0        | 0        | 0        | 0.51996  | 0.11429  | 0.375003  |
| ENSMUSG Ppcdc     | 7.919907 | 5.960445 | 6.769609 | 7.200143 | 5.393339 | 6.073761  |
| ENSMUSG Pabpc6    | 0        | 0        | 0        | 0        | 0        | 0         |
| ENSMUSG Sh3rf2    | 8.344836 | 8.426144 | 7.723289 | 5.363983 | 4.95105  | 5.647902  |
| ENSMUSG Tmem178l  | 0.165    | 0.168265 | 0.174248 | 0.032854 | 0.034601 | 0.016518  |
| ENSMUSG A830018L  | 0.240387 | 0.333722 | 0.126986 | 0.180977 | 0.115812 | 0.159481  |
| ENSMUSG Olfr695   | 0        | 0        | 0        | 0        | 0        | 0         |
| ENSMUSG 9630041A  | 0        | 0        | 0        | 0        | 0        | 0         |
| ENSMUSG Msx3      | 0        | 0.014344 | 0        | 0.35431  | 0.384597 | 0.937849  |
| ENSMUSG Caly      | 0        | 0.036174 | 0        | 0        | 0        | 0         |
| ENSMUSG Vmn1r38   | 0        | 0        | 0        | 0        | 0        | 0         |

|                  |          |          |          |          |          |           |
|------------------|----------|----------|----------|----------|----------|-----------|
| ENSMUSG Cd163l1  | 0.600079 | 0.447202 | 0.244307 | 0.693243 | 0.359602 | 0.488941  |
| ENSMUSG Echs1    | 29.84646 | 33.41298 | 31.44388 | 34.36212 | 33.06224 | 34.504635 |
| ENSMUSG Paox     | 2.50205  | 2.628641 | 2.79198  | 2.302906 | 2.338227 | 3.062958  |
| ENSMUSG Prap1    | 0        | 0        | 0        | 0        | 0        | 0         |
| ENSMUSG Fuom     | 4.756509 | 3.732373 | 5.768994 | 8.544689 | 9.525018 | 10.328068 |
| ENSMUSG Zbed6    | 0.241511 | 0.954969 | 0.416719 | 0.139631 | 0.148586 | 0.231895  |
| ENSMUSG Gm21294  | 0        | 0        | 0        | 0        | 0        | 0         |
| ENSMUSG Cdc42se2 | 40.461   | 39.36401 | 40.34469 | 50.13944 | 50.24908 | 49.381269 |
| ENSMUSG Sec24d   | 11.08993 | 10.92897 | 9.756874 | 16.30223 | 17.58381 | 18.045721 |
| ENSMUSG lsg20    | 25.97889 | 25.39228 | 27.61395 | 26.62022 | 26.6331  | 25.328192 |
| ENSMUSG Suv39h1  | 6.25799  | 6.853846 | 7.121675 | 5.787596 | 6.561155 | 5.694549  |
| ENSMUSG Tbcd     | 10.32682 | 9.230135 | 10.38886 | 8.198023 | 8.957484 | 9.560043  |
| ENSMUSG Tbce     | 8.311326 | 7.289189 | 9.077346 | 7.74548  | 6.85013  | 7.388839  |
| ENSMUSG Stx11    | 6.363363 | 4.868628 | 6.063102 | 5.865474 | 5.462221 | 6.063187  |
| ENSMUSG Taf9     | 2.848926 | 1.135858 | 2.120261 | 3.111859 | 2.751946 | 2.466785  |
| ENSMUSG Tgfb2    | 6.066858 | 5.531596 | 5.704094 | 3.075885 | 2.447661 | 3.387145  |
| ENSMUSG Zfp750   | 0.994728 | 0.871475 | 0.391815 | 1.258387 | 0.888464 | 1.016501  |
| ENSMUSG Ppp6r1   | 38.7862  | 37.18837 | 38.13839 | 40.49076 | 38.85574 | 41.736032 |
| ENSMUSG Olfr832  | 0        | 0        | 0        | 0        | 0        | 0.010258  |
| ENSMUSG Gm3183   | 0        | 0        | 0        | 0        | 0        | 0         |
| ENSMUSG Gm20737  | 0        | 0        | 0        | 0        | 0        | 0         |
| ENSMUSG Gsta1    | 0.391177 | 0.923518 | 0.209996 | 0.321848 | 0.279078 | 0.306381  |
| ENSMUSG Olfr1419 | 0.018279 | 0.081308 | 0        | 0.032129 | 0        | 0         |
| ENSMUSG A630073D | 0        | 0        | 0        | 0        | 0        | 0         |
| ENSMUSG Prb1     | 0        | 0        | 0        | 0        | 0        | 0         |
| ENSMUSG Gm49337  | 0        | 0        | 0        | 0        | 0        | 0         |
| ENSMUSG Chpt1    | 26.38068 | 29.55545 | 21.30752 | 22.02165 | 18.99816 | 18.838931 |
| ENSMUSG Olfr461  | 0.059883 | 0.024408 | 0.026901 | 0.007379 | 0        | 0         |
| ENSMUSG Amn1     | 7.72312  | 7.404792 | 8.02978  | 5.932903 | 5.291439 | 4.843854  |
| ENSMUSG Apol7b   | 0.049999 | 0.057372 | 0.03006  | 0.03149  | 0.037997 | 0.073153  |
| ENSMUSG Aldh5a1  | 2.204783 | 2.270699 | 1.602455 | 1.912976 | 1.720895 | 1.546551  |
| ENSMUSG Pknox2   | 29.55043 | 18.62429 | 37.47893 | 12.74894 | 12.38733 | 17.092915 |
| ENSMUSG Olfr750  | 0.431683 | 0.352189 | 0.438999 | 0.153233 | 0.205706 | 0.256432  |
| ENSMUSG Cog5     | 14.22897 | 16.0647  | 12.71168 | 16.37026 | 16.32908 | 17.045408 |
| ENSMUSG Chst4    | 1.105396 | 1.004784 | 0.77923  | 0.444265 | 0.200264 | 0.256797  |
| ENSMUSG Gsg1l2   | 0        | 0        | 0        | 0        | 0        | 0         |
| ENSMUSG Vmn1r1   | 0        | 0        | 0        | 0        | 0        | 0         |
| ENSMUSG Vmn1r34  | 0        | 0        | 0        | 0        | 0        | 0         |
| ENSMUSG Fam71a   | 0        | 0        | 0        | 0        | 0        | 0         |
| ENSMUSG Tnfsfm13 | 20.08825 | 20.09142 | 17.98413 | 16.82944 | 19.44327 | 22.995075 |
| ENSMUSG Zbtb4    | 39.58458 | 39.92344 | 35.2836  | 26.50748 | 27.42207 | 25.827031 |
| ENSMUSG Capg     | 33.48778 | 33.48839 | 34.18161 | 110.6364 | 95.40009 | 122.27713 |
| ENSMUSG Ndufb7   | 60.08012 | 55.40247 | 61.67675 | 60.36559 | 58.37148 | 63.472118 |
| ENSMUSG Slc26a11 | 2.496884 | 2.190991 | 2.257037 | 2.435485 | 3.354262 | 3.107383  |
| ENSMUSG Eva1c    | 6.183774 | 8.059727 | 5.593797 | 5.29426  | 4.832465 | 3.767226  |
| ENSMUSG Armh3    | 5.935456 | 5.230423 | 5.234863 | 4.615785 | 4.469915 | 4.946248  |
| ENSMUSG Gpr37    | 0.022682 | 0.029016 | 0.016099 | 0.092186 | 0.026386 | 0.040659  |
| ENSMUSG Adat2    | 1.725168 | 2.079341 | 1.958599 | 2.505074 | 2.497269 | 1.571969  |
| ENSMUSG Pex3     | 11.81279 | 9.633497 | 10.41677 | 9.236205 | 8.09022  | 8.343145  |
| ENSMUSG Snx3     | 99.21214 | 103.169  | 109.045  | 87.12744 | 93.34641 | 91.816412 |
| ENSMUSG Aig1     | 16.64499 | 15.74133 | 14.50729 | 19.88831 | 18.10727 | 19.362036 |
| ENSMUSG Sec63    | 30.92641 | 29.45681 | 27.62644 | 24.54876 | 25.51798 | 23.268339 |
| ENSMUSG Nr2e1    | 0        | 0        | 0        | 0        | 0        | 0         |
| ENSMUSG Tnc      | 0.838512 | 0.835921 | 1.218178 | 1.745863 | 2.199351 | 2.866776  |
| ENSMUSG Hmg20b   | 24.34706 | 24.98246 | 27.5454  | 27.40664 | 26.8512  | 28.216081 |
| ENSMUSG Dip2a    | 10.26187 | 10.3257  | 9.962146 | 8.2573   | 8.786687 | 8.67588   |
| ENSMUSG Prmt2    | 32.91    | 29.6139  | 35.24184 | 20.50065 | 21.85012 | 23.25836  |
| ENSMUSG Ctnna2   | 0        | 0.041414 | 0        | 0        | 0        | 0         |
| ENSMUSG Fzr1     | 10.34367 | 9.136602 | 9.090845 | 9.638712 | 9.945016 | 11.812622 |
| ENSMUSG 4930404N | 0.939398 | 0.665165 | 0.866163 | 1.692164 | 1.83398  | 1.839474  |
| ENSMUSG Ncln     | 25.63802 | 25.01624 | 27.22258 | 25.52601 | 24.21207 | 27.856395 |
| ENSMUSG Olfr1344 | 0        | 0        | 0.034392 | 0.049203 | 0        | 0         |
| ENSMUSG Gm8297   | 0        | 0        | 0        | 0        | 0        | 0         |
| ENSMUSG Tmem120l | 2.900596 | 3.419799 | 3.319273 | 2.955324 | 2.581789 | 2.802728  |



|                   |          |          |          |          |          |           |
|-------------------|----------|----------|----------|----------|----------|-----------|
| ENSMUSG Gimap4    | 73.92431 | 61.09113 | 91.88412 | 70.75427 | 59.11645 | 60.440912 |
| ENSMUSG Olfr450   | 0        | 0        | 0        | 0        | 0        | 0         |
| ENSMUSG Gm21732   | 0        | 0        | 0        | 0        | 0        | 0         |
| ENSMUSG Mcee      | 14.94437 | 16.65389 | 15.02328 | 16.11703 | 15.10239 | 17.204837 |
| ENSMUSG Vmn2r31   | 0        | 0        | 0        | 0        | 0        | 0         |
| ENSMUSG Upb1      | 0.036469 | 0.064524 | 0.036875 | 0.689734 | 0.520001 | 0.666419  |
| ENSMUSG Gm21992   | 0.485855 | 0.719471 | 0.543114 | 0.767941 | 0.550882 | 0.650641  |
| ENSMUSG Eri3      | 20.80655 | 17.36373 | 16.32194 | 16.81878 | 16.3845  | 20.285683 |
| ENSMUSG Antxr1    | 35.58722 | 35.7779  | 29.8346  | 29.58118 | 30.89268 | 32.573249 |
| ENSMUSG Ace3      | 1.711179 | 1.494723 | 2.430524 | 1.552548 | 1.830819 | 1.100542  |
| ENSMUSG Arhgef4   | 1.292126 | 1.334822 | 1.317103 | 1.479798 | 1.636937 | 1.594462  |
| ENSMUSG Fam168b   | 43.90757 | 44.04005 | 42.68066 | 38.79887 | 39.76771 | 39.850563 |
| ENSMUSG Arl14ep   | 6.44067  | 5.819036 | 5.179309 | 5.579364 | 5.495038 | 5.626344  |
| ENSMUSG Tas2r129  | 0        | 0        | 0        | 0        | 0        | 0         |
| ENSMUSG Hist1h2bk | 8.74398  | 13.8023  | 10.9733  | 14.7752  | 12.93964 | 15.491537 |
| ENSMUSG Neb       | 0.1132   | 0.062234 | 0.108683 | 0.259495 | 0.25414  | 0.378833  |
| ENSMUSG Lrrtm1    | 0        | 0.0313   | 0.05814  | 0.017649 | 0.018934 | 0.025965  |
| ENSMUSG Olfr464   | 0.055626 | 0.041757 | 0.034146 | 0.122967 | 0.312065 | 0.229773  |
| ENSMUSG Ctdsp1    | 56.02356 | 56.18933 | 56.29274 | 46.60722 | 46.03315 | 43.616055 |
| ENSMUSG Slc11a1   | 2.979432 | 2.746522 | 4.882131 | 7.118726 | 7.663216 | 9.399386  |
| ENSMUSG Cnot9     | 7.950772 | 8.351493 | 8.591835 | 8.908556 | 8.257084 | 8.366272  |
| ENSMUSG Vil1      | 0.287916 | 0.429438 | 0.242967 | 0.120541 | 0.174504 | 0.132833  |
| ENSMUSG Fam189a2  | 36.67366 | 38.24664 | 36.37484 | 30.62274 | 30.61297 | 29.535145 |
| ENSMUSG Plcd4     | 0.812295 | 0.650858 | 0.531849 | 0.301176 | 0.287737 | 0.573585  |
| ENSMUSG Cyp27a1   | 10.1375  | 10.4777  | 11.38502 | 7.804146 | 6.029441 | 7.338732  |
| ENSMUSG Rnf25     | 16.18373 | 13.01697 | 14.81312 | 14.47734 | 11.68498 | 13.846137 |
| ENSMUSG Selenot   | 64.67208 | 71.81546 | 72.13685 | 64.38239 | 67.3913  | 62.443295 |
| ENSMUSG Uap111    | 11.91749 | 8.112894 | 9.644191 | 10.54415 | 12.0095  | 13.004655 |
| Mus_musc Mus_musc | 0        | 0        | 0        | 0        | 0        | 0.184186  |
| ENSMUSG Olfr1420  | 0.033863 | 0.063899 | 0.177828 | 0.212958 | 0.047538 | 0.039345  |
| ENSMUSG Angptl6   | 0.386475 | 0.876465 | 0.660758 | 0.581125 | 0.642324 | 0.935816  |
| ENSMUSG Mvb12b    | 11.28959 | 10.89474 | 9.682039 | 10.24166 | 9.849833 | 9.828241  |
| ENSMUSG Nlrp6     | 0.067095 | 0        | 0        | 0.029186 | 0.012626 | 0.026407  |
| ENSMUSG Fgf11     | 3.055043 | 2.926273 | 3.254376 | 4.076904 | 3.449508 | 4.349047  |
| ENSMUSG Snai1     | 9.375125 | 9.129949 | 10.18484 | 6.554645 | 5.790688 | 6.061898  |
| ENSMUSG Trim72    | 0.314208 | 1.155178 | 0.238521 | 0.589161 | 0.513714 | 0.458049  |
| ENSMUSG Ephb3     | 11.10679 | 9.36812  | 10.16008 | 7.79708  | 7.757379 | 8.044639  |
| ENSMUSG Trpv1     | 0        | 0.013131 | 0        | 0        | 0        | 0.01644   |
| ENSMUSG Shpk      | 1.803508 | 2.002233 | 1.923033 | 1.774184 | 2.400681 | 2.289389  |
| ENSMUSG P2rx5     | 1.68258  | 2.056082 | 1.871287 | 2.833811 | 2.480572 | 3.167042  |
| Mus_musc Mus_musc | 0        | 0        | 0        | 0        | 0        | 0         |
| ENSMUSG 2410015M  | 29.56855 | 24.15645 | 29.66859 | 29.85983 | 25.58794 | 30.384298 |
| ENSMUSG Pmis2     | 0        | 0        | 0        | 0        | 0        | 0         |
| ENSMUSG Glg1      | 28.78237 | 26.59243 | 26.70581 | 26.29741 | 28.00364 | 29.101202 |
| ENSMUSG Zfp280b   | 4.40786  | 4.553272 | 4.960618 | 7.055095 | 8.655847 | 6.662157  |
| ENSMUSG Kcnj3     | 0.0724   | 0.921035 | 0.059152 | 0.239118 | 0.228112 | 0.122767  |
| ENSMUSG Dnm1      | 2.461894 | 2.507656 | 2.475944 | 1.936242 | 1.610255 | 1.964152  |
| ENSMUSG Nr4a2     | 2.947708 | 2.189163 | 1.650204 | 1.089052 | 1.316153 | 1.13922   |
| ENSMUSG Gpd2      | 8.463913 | 8.217798 | 7.131279 | 7.360959 | 7.824772 | 7.771832  |
| ENSMUSG Ptges2    | 2.454431 | 2.511726 | 2.479102 | 2.28072  | 2.102062 | 2.601603  |
| ENSMUSG Ralgsd    | 14.73024 | 15.38533 | 16.34468 | 20.3639  | 24.18883 | 22.405384 |
| ENSMUSG Lcn2      | 54.41553 | 48.20093 | 43.79215 | 226.3588 | 315.2565 | 242.07046 |
| ENSMUSG Galnt5    | 0.524752 | 0.615447 | 0.287052 | 0.92     | 1.000008 | 0.991274  |
| ENSMUSG Gbgt1     | 2.088222 | 2.384058 | 2.051952 | 3.157753 | 3.18212  | 3.123614  |
| ENSMUSG Gdpd1     | 19.17168 | 18.76545 | 14.99922 | 14.24581 | 16.75264 | 14.745938 |
| ENSMUSG Smco1     | 0        | 0        | 0        | 0        | 0        | 0         |
| ENSMUSG Tgfbr3    | 23.38599 | 18.58315 | 20.97804 | 10.20783 | 11.02825 | 9.114785  |
| ENSMUSG Nadk2     | 5.804739 | 6.737474 | 6.258357 | 6.553434 | 5.610548 | 6.299539  |
| ENSMUSG Gabrr3    | 0        | 0        | 0        | 0        | 0        | 0         |
| ENSMUSG Wdr89     | 3.077934 | 2.962645 | 3.299614 | 3.610353 | 3.289395 | 3.695163  |
| ENSMUSG Thtpa     | 7.440685 | 6.964437 | 6.036605 | 7.328185 | 6.724263 | 6.153335  |
| ENSMUSG Nlrp4e    | 0        | 0        | 0        | 0        | 0        | 0         |
| ENSMUSG Rgp1      | 10.06053 | 9.786787 | 9.897579 | 9.555957 | 9.151309 | 10.151717 |
| ENSMUSG Npr2      | 26.99092 | 26.05272 | 26.76232 | 16.58716 | 16.23823 | 16.011308 |

|                   |          |          |          |          |          |           |
|-------------------|----------|----------|----------|----------|----------|-----------|
| ENSMUSG Creb3     | 35.00995 | 31.12062 | 35.38804 | 25.89639 | 26.5558  | 27.723042 |
| ENSMUSG Gba2      | 8.269262 | 7.158279 | 7.70348  | 6.852872 | 6.927232 | 6.817201  |
| ENSMUSG Tpm2      | 28.00667 | 22.57508 | 26.94452 | 38.27759 | 43.95199 | 40.606764 |
| ENSMUSG Prpf31    | 8.325844 | 7.497272 | 9.516046 | 7.947475 | 9.29981  | 9.936343  |
| ENSMUSG Car9      | 0.774805 | 0.5643   | 0.761674 | 0.774987 | 0.575858 | 0.691495  |
| ENSMUSG Sit1      | 0.596096 | 0.86466  | 0.483146 | 1.662364 | 0.775351 | 1.038522  |
| ENSMUSG Ccdc107   | 20.87899 | 19.68656 | 18.73436 | 18.96412 | 17.3548  | 18.012146 |
| ENSMUSG Gm597     | 0        | 0        | 0        | 0        | 0        | 0         |
| ENSMUSG Zfp407    | 3.037067 | 3.086293 | 2.620466 | 2.53665  | 2.921065 | 2.632878  |
| ENSMUSG Pgp       | 16.07701 | 14.89543 | 15.31223 | 12.32004 | 15.31098 | 16.183361 |
| ENSMUSG Gpr149    | 0.053265 | 0        | 0        | 0        | 0        | 0         |
| ENSMUSG Mlf1      | 6.48898  | 8.591234 | 4.644076 | 11.29305 | 8.352531 | 10.403482 |
| Mus_musc Mus_musc | 0.107073 | 0.150452 | 0        | 0.213895 | 0.17779  | 0.033256  |
| ENSMUSG Gjc2      | 0.318286 | 0.245459 | 0.588745 | 0.176562 | 0.186348 | 0.284154  |
| Mus_musc Mus_musc | 0.314501 | 0.296014 | 0.316727 | 0.485251 | 0.152748 | 0.202872  |
| Mus_musc Mus_musc | 0.083884 | 0.307115 | 0.248217 | 0.35269  | 0.448289 | 0.264612  |
| Mus_musc Mus_musc | 0.397055 | 0.303976 | 0.247586 | 0.376828 | 0.434285 | 0.490288  |
| Mus_musc Mus_musc | 0.086246 | 0.070778 | 0.09843  | 0        | 0        | 0.086385  |
| ENSMUSG Slc31a2   | 21.77381 | 20.19311 | 26.40006 | 22.44073 | 22.47191 | 22.819144 |
| Mus_musc Mus_musc | 0        | 0        | 0        | 0.146185 | 0.418625 | 0.089266  |
| ENSMUSG Crip1     | 189.064  | 189.5503 | 209.8125 | 218.6198 | 188.1753 | 223.60183 |
| ENSMUSG Cbfa2t3   | 21.18495 | 20.39324 | 22.39864 | 13.17213 | 14.85729 | 14.040709 |
| ENSMUSG Fbln1     | 7.435526 | 8.934553 | 6.665354 | 10.13344 | 10.17404 | 12.096793 |
| ENSMUSG S100a13   | 29.89805 | 39.3098  | 41.78275 | 35.15358 | 32.06147 | 33.449898 |
| ENSMUSG Mki67     | 1.498388 | 1.437296 | 1.79188  | 6.423137 | 9.098962 | 9.423835  |
| ENSMUSG Zfp444    | 10.10157 | 10.40375 | 7.681922 | 7.968079 | 8.29732  | 8.750988  |
| ENSMUSG Gm281     | 1.794388 | 2.285993 | 0.921938 | 2.353374 | 1.751917 | 1.53005   |
| ENSMUSG Bmpr1b    | 2.25829  | 1.343973 | 0.914583 | 1.119766 | 1.236957 | 1.082828  |
| ENSMUSG Gpr85     | 0.206878 | 0.12996  | 0.097616 | 0.218573 | 0.456463 | 0.375778  |
| ENSMUSG Rhox4c    | 0        | 0        | 0        | 0        | 0        | 0         |
| ENSMUSG Rhox2c    | 0        | 0        | 0        | 0        | 0        | 0         |
| ENSMUSG Rhox3c    | 0        | 0        | 0        | 0        | 0        | 0         |
| ENSMUSG Rhox4f    | 0        | 0        | 0        | 0        | 0        | 0         |
| ENSMUSG Rhox4d    | 0        | 0        | 0        | 0        | 0        | 0         |
| ENSMUSG Gm9767    | 0        | 0        | 0        | 0.039805 | 0        | 0         |
| ENSMUSG Nr2e3     | 0        | 0        | 0        | 0        | 0        | 0         |
| ENSMUSG Nfe2l2    | 76.355   | 82.91744 | 78.46128 | 65.61846 | 65.96745 | 71.081047 |
| ENSMUSG Ptpn9     | 15.60115 | 14.21101 | 15.51481 | 12.21499 | 13.88485 | 14.127246 |
| ENSMUSG Crabp1    | 0.208194 | 0        | 0        | 0.262543 | 0.465101 | 0.064304  |
| ENSMUSG Rhox4a    | 0        | 0        | 0        | 0.058319 | 0        | 0         |
| ENSMUSG Celf6     | 0        | 0        | 0        | 0.045096 | 0.018143 | 0         |
| ENSMUSG Pkm       | 150.0054 | 146.6428 | 154.6075 | 139.5794 | 146.6357 | 159.23975 |
| ENSMUSG Man2c1    | 13.16066 | 12.2454  | 12.53022 | 11.48196 | 9.867607 | 11.161101 |
| ENSMUSG Ctla2a    | 119.0842 | 108.3129 | 134.1657 | 69.91807 | 66.61889 | 53.883809 |
| ENSMUSG Dguok     | 20.56839 | 20.97611 | 21.21195 | 18.24712 | 15.28025 | 17.503967 |
| ENSMUSG Osbpl1a   | 7.802623 | 7.789282 | 6.945031 | 6.724313 | 6.380742 | 6.3053    |
| ENSMUSG Pced1b    | 7.279373 | 7.164734 | 9.483751 | 6.820132 | 5.475969 | 7.560173  |
| ENSMUSG Pcsk9     | 0.062642 | 0.025024 | 0        | 0.029653 | 0.063627 | 0.08647   |
| ENSMUSG Mrps25    | 4.120331 | 4.56852  | 5.784294 | 4.454556 | 4.976602 | 4.590627  |
| Mus_musc Mus_musc | 0        | 0        | 0.179944 | 0        | 0.307735 | 0.097197  |
| ENSMUSG Abce1     | 19.13412 | 20.24851 | 19.14884 | 20.78461 | 20.20833 | 21.004564 |
| ENSMUSG Krt6a     | 0        | 0        | 0        | 0        | 0        | 0         |
| ENSMUSG Smim4     | 5.361968 | 6.147041 | 7.473642 | 6.844541 | 4.848701 | 5.503679  |
| ENSMUSG Olfr1023  | 0        | 0        | 0        | 0        | 0        | 0         |
| ENSMUSG Opalin    | 0        | 0        | 0        | 0.04535  | 0        | 0         |
| ENSMUSG Vwa3b     | 1.405505 | 1.64195  | 0.771719 | 2.227119 | 1.790285 | 1.52845   |
| ENSMUSG Slfn4     | 5.115328 | 2.794573 | 7.882231 | 2.191909 | 1.41741  | 1.330646  |
| Mus_musc Mus_musc | 0.863544 | 1.089093 | 0.768178 | 1.599774 | 1.674798 | 1.513622  |
| Mus_musc Mus_musc | 0.137955 | 0.497819 | 0.262644 | 0.632793 | 0.577511 | 0.844925  |
| Mus_musc Mus_musc | 0        | 0        | 0        | 0        | 0        | 0.184186  |
| Mus_musc Mus_musc | 0        | 0        | 0.092175 | 0.190529 | 0.102204 | 0         |
| Mus_musc Mus_musc | 0        | 0        | 0        | 0.078971 | 0.09672  | 0.233071  |
| Mus_musc Mus_musc | 0.267223 | 0        | 0        | 0.319873 | 0        | 0         |
| ENSMUSG Setmar    | 2.362318 | 1.602438 | 2.355134 | 1.589804 | 1.703816 | 2.195172  |

|                    |          |          |          |          |          |           |
|--------------------|----------|----------|----------|----------|----------|-----------|
| ENSMUSG Mrgprh     | 0        | 0.023813 | 0        | 0        | 0        | 0         |
| ENSMUSG Ppp2r5d    | 20.06612 | 20.78535 | 21.09755 | 16.66342 | 18.34266 | 17.936644 |
| ENSMUSG Tmprss9    | 0.011529 | 0.01168  | 0        | 0.034988 | 0.096396 | 0.079343  |
| ENSMUSG Mamld1     | 2.24808  | 2.206375 | 2.051421 | 2.095083 | 2.271041 | 2.142787  |
| ENSMUSG Olfr1049   | 0        | 0        | 0        | 0        | 0        | 0         |
| ENSMUSG Olfr1048   | 0        | 0        | 0        | 0        | 0        | 0         |
| ENSMUSG Olfr1047   | 0        | 0        | 0        | 0        | 0        | 0         |
| ENSMUSG Olfr1046   | 0        | 0        | 0        | 0        | 0        | 0         |
| ENSMUSG Olfr1054   | 0        | 0        | 0        | 0        | 0        | 0         |
| ENSMUSG Olfr1053   | 0        | 0        | 0        | 0        | 0        | 0         |
| ENSMUSG Olfr1051   | 0        | 0        | 0        | 0        | 0        | 0         |
| ENSMUSG Olfr1045   | 0        | 0        | 0        | 0        | 0        | 0         |
| ENSMUSG Olfr52     | 0        | 0        | 0        | 0        | 0        | 0         |
| ENSMUSG Trem3      | 1.196288 | 1.318149 | 2.366806 | 1.628527 | 0.385781 | 1.006168  |
| ENSMUSG Plekha6    | 6.792263 | 4.613246 | 5.858825 | 5.910607 | 5.665064 | 6.251778  |
| ENSMUSG Cd1d2      | 1.696445 | 1.241203 | 1.370241 | 1.732433 | 1.459469 | 1.164563  |
| ENSMUSG Hs3st3a1   | 0.285365 | 0.235477 | 0.207039 | 0.450366 | 0.264218 | 0.360135  |
| ENSMUSG Fancb      | 1.399124 | 1.073583 | 1.425974 | 1.229958 | 1.415678 | 1.235039  |
| ENSMUSG Utf1       | 0.040769 | 0.150914 | 0        | 0.285772 | 0.176042 | 0.155965  |
| ENSMUSG Dcun1d1    | 7.705936 | 9.227871 | 7.639445 | 8.497202 | 8.027205 | 8.342871  |
| ENSMUSG Mccc1      | 8.842587 | 11.16509 | 9.136483 | 10.12706 | 8.812459 | 10.473857 |
| ENSMUSG Sec62      | 56.65067 | 56.82956 | 58.30494 | 46.7586  | 46.9783  | 40.317612 |
| ENSMUSG B3gnt2     | 21.42517 | 22.89055 | 20.63863 | 16.23677 | 19.41227 | 17.628438 |
| ENSMUSG Krt72      | 0        | 0        | 0        | 0        | 0        | 0         |
| ENSMUSG Lrrc3      | 0.355579 | 0.362605 | 0.260089 | 0.364316 | 0.432564 | 0.277223  |
| ENSMUSG Lrrc34     | 1.73156  | 2.006428 | 1.0114   | 2.519139 | 2.807296 | 1.824476  |
| ENSMUSG Lrriq4     | 0        | 0        | 0.020299 | 0        | 0        | 0         |
| ENSMUSG Olfr90     | 0        | 0        | 0        | 0        | 0        | 0         |
| ENSMUSG Heatr6     | 4.383554 | 4.770582 | 4.360623 | 3.930753 | 4.640738 | 4.403229  |
| ENSMUSG Lgals8     | 26.61328 | 24.23672 | 26.13762 | 23.85362 | 23.67002 | 23.669329 |
| ENSMUSG Zfp317     | 5.819525 | 6.059722 | 5.298774 | 4.895937 | 4.661444 | 5.170103  |
| ENSMUSG Akap9      | 8.615876 | 9.17786  | 7.359528 | 8.424123 | 8.305507 | 8.239735  |
| ENSMUSG Havcr1     | 0.224989 | 0.136294 | 0.299987 | 0.909604 | 0.956398 | 0.616889  |
| ENSMUSG B230307C;  | 3.60577  | 2.709871 | 2.127556 | 5.153851 | 3.927395 | 3.532216  |
| ENSMUSG Olfr1174-f | 0        | 0        | 0        | 0        | 0        | 0         |
| ENSMUSG Gm28041    | 0        | 0.09349  | 0        | 0.016457 | 0.021961 | 0.082899  |
| ENSMUSG Phgr1      | 0.259497 | 0        | 0        | 0.240155 | 0        | 0.232782  |
| ENSMUSG Mpeg1      | 46.20086 | 48.00114 | 61.9498  | 89.68047 | 84.22349 | 94.917656 |
| ENSMUSG Cyren      | 4.622389 | 3.952324 | 6.654215 | 4.84992  | 3.655181 | 3.606618  |
| ENSMUSG Lrrc75b    | 0.416236 | 0.145589 | 0.344481 | 0.386806 | 0.276961 | 0.315176  |
| ENSMUSG Atp10b     | 0        | 0.069004 | 0        | 0.485792 | 0.729263 | 0.637001  |
| ENSMUSG Skint1     | 0        | 0        | 0        | 0        | 0        | 0         |
| ENSMUSG Slc5a3     | 1.156529 | 1.887082 | 1.547664 | 1.159084 | 1.16224  | 1.327134  |
| ENSMUSG Insig2     | 15.72573 | 15.91483 | 16.96723 | 14.33809 | 14.05303 | 14.69127  |
| ENSMUSG H2afy      | 39.33443 | 38.62965 | 41.55619 | 40.83362 | 39.07029 | 42.606489 |
| ENSMUSG Dstn       | 234.8265 | 235.9083 | 215.2784 | 163.736  | 180.7659 | 175.84815 |
| ENSMUSG Tgfbr1     | 16.12011 | 17.26084 | 16.48149 | 22.46361 | 21.67969 | 21.446237 |
| ENSMUSG Gtpbp3     | 8.449803 | 8.91584  | 11.33937 | 9.312863 | 8.134532 | 9.318238  |
| ENSMUSG Homer1     | 3.10741  | 3.215199 | 2.8958   | 3.518516 | 3.131194 | 2.927889  |
| ENSMUSG Gm15319    | 0.059483 | 0.03576  | 0.010277 | 0.034241 | 0.081428 | 0.07656   |
| ENSMUSG Tmprss11c  | 0        | 0        | 0        | 0.038442 | 0        | 0         |
| Mus_musc Mus_musc  | 0.565763 | 0.283713 | 0.493972 | 0.388568 | 0.618787 | 0.293237  |
| Mus_musc Mus_musc  | 0        | 0        | 0        | 0        | 0.024394 | 0         |
| Mus_musc Mus_musc  | 0        | 0        | 0        | 0        | 0        | 0         |
| Mus_musc Mus_musc  | 0.419757 | 0.549259 | 0.517227 | 0.349566 | 0.168188 | 0.182563  |
| ENSMUSG Kcnq1      | 14.7712  | 13.58514 | 12.12113 | 12.28148 | 13.31092 | 13.348287 |
| Mus_musc Mus_musc  | 0        | 0        | 0        | 0.023445 | 0        | 0         |
| Mus_musc Mus_musc  | 0.346441 | 0.239636 | 0.240424 | 0.534811 | 0.360049 | 0.458824  |
| Mus_musc Mus_musc  | 0.498702 | 0.436693 | 0.307626 | 0.30322  | 0.112144 | 0.052841  |
| Mus_musc Mus_musc  | 10.97127 | 11.97541 | 7.989299 | 5.306593 | 5.960689 | 7.067908  |
| Mus_musc Mus_musc  | 0.116665 | 0.21992  | 0.240861 | 0.561001 | 0.345759 | 0.427186  |
| Mus_musc Mus_musc  | 0        | 0        | 0        | 0        | 0        | 0         |
| ENSMUSG Cyp2d34    | 0        | 0        | 0        | 0        | 0        | 0         |
| ENSMUSG Btbd35f11  | 0        | 0        | 0        | 0        | 0        | 0         |

|                   |          |          |          |          |          |           |
|-------------------|----------|----------|----------|----------|----------|-----------|
| ENSMUSG Defa3     | 0        | 0        | 0        | 0        | 0        | 0         |
| Mus_musc Mus_musc | 0        | 0        | 0.038175 | 0        | 0.136261 | 0.356412  |
| Mus_musc Mus_musc | 0.155912 | 0.131245 | 0.286771 | 0.080506 | 0        | 0.471281  |
| Mus_musc Mus_musc | 0        | 0        | 0        | 0.174016 | 0        | 0         |
| ENSMUSG Ifi213    | 0.03825  | 0.068546 | 0.107767 | 0.065856 | 0.019906 | 0.101714  |
| ENSMUSG Vmn1r50   | 0        | 0        | 0        | 0        | 0        | 0         |
| Mus_musc Mus_musc | 0.406798 | 0.828041 | 0.7349   | 0.284207 | 0.232342 | 0.282949  |
| ENSMUSG Gm5415    | 0        | 0        | 0        | 0        | 0        | 0         |
| ENSMUSG Defa31    | 0        | 0        | 0        | 0        | 0        | 0         |
| ENSMUSG Spata31d1 | 0        | 0        | 0        | 0.012177 | 0.013065 | 0.030075  |
| ENSMUSG Gm17490   | 0        | 0        | 0        | 0        | 0        | 0         |
| ENSMUSG Sh2d1b2   | 0        | 0        | 0.054961 | 0        | 0        | 0         |
| ENSMUSG Methig1   | 0.248544 | 0.03742  | 0.225367 | 0.113809 | 0.066681 | 0.014515  |
| ENSMUSG Cradd     | 5.265837 | 6.656794 | 5.006612 | 6.583293 | 4.680238 | 8.174109  |
| ENSMUSG Gvin1     | 7.816462 | 6.606877 | 30.21612 | 20.37392 | 6.918178 | 7.67163   |
| Mus_musc Mus_musc | 0.348464 | 0.315523 | 0.129825 | 0.406263 | 0.599733 | 0.384183  |
| ENSMUSG Gm7168    | 0.030733 | 0        | 0        | 0        | 0.069879 | 0         |
| ENSMUSG Zfp160    | 5.096538 | 5.051402 | 6.025576 | 4.857733 | 4.597675 | 4.975036  |
| ENSMUSG Vmn1r91   | 0        | 0        | 0        | 0        | 0        | 0         |
| Mus_musc Mus_musc | 0        | 0        | 0        | 0.265112 | 0        | 0         |
| Mus_musc Mus_musc | 0        | 0.123839 | 0        | 0        | 0        | 0         |
| Mus_musc Mus_musc | 0        | 0        | 0        | 0        | 0        | 0         |
| Mus_musc Mus_musc | 0.275889 | 0.471839 | 0.288704 | 0.33317  | 0.324854 | 0.467776  |
| ENSMUSG Olfr494   | 0        | 0        | 0        | 0        | 0        | 0         |
| ENSMUSG Gm20903   | 0        | 0        | 0        | 0        | 0        | 0         |
| ENSMUSG Vmn1r192  | 0        | 0        | 0        | 0        | 0        | 0         |
| ENSMUSG Gm2956    | 0        | 0.004467 | 0        | 0        | 0        | 0         |
| ENSMUSG Ceacam16  | 0.127929 | 0.030484 | 0.140625 | 0.168193 | 0.166507 | 0.124255  |
| ENSMUSG Sympk     | 22.18109 | 24.25307 | 24.83499 | 23.6251  | 23.87477 | 24.047834 |
| ENSMUSG Zfp207    | 51.86327 | 53.76875 | 55.49479 | 51.08093 | 50.68193 | 49.578064 |
| ENSMUSG Psm11     | 21.83672 | 23.96825 | 23.92283 | 23.05451 | 20.13922 | 23.591212 |
| ENSMUSG A930018P: | 0        | 0        | 0        | 0        | 0        | 0         |
| ENSMUSG Krt15     | 0.225306 | 0.310523 | 0.181381 | 0.352332 | 0        | 0.204338  |
| ENSMUSG Eef1a1    | 2594.996 | 2642.787 | 2625.031 | 2707.679 | 2685.9   | 2877.0602 |
| ENSMUSG Mrps26    | 7.609157 | 7.224761 | 7.71943  | 6.836663 | 7.173799 | 7.297487  |
| ENSMUSG Phyhipl   | 0.078824 | 0.03058  | 0        | 0        | 0        | 0         |
| ENSMUSG Olfr24    | 0        | 0        | 0        | 0        | 0        | 0         |
| ENSMUSG ler3      | 103.2957 | 67.24297 | 95.63527 | 45.78887 | 40.87259 | 46.209091 |
| ENSMUSG Mst1r     | 1.658349 | 1.794716 | 1.479093 | 1.174943 | 1.068361 | 1.294214  |
| ENSMUSG Olfr789   | 0        | 0        | 0        | 0        | 0        | 0         |
| ENSMUSG Mon1a     | 8.401526 | 8.054843 | 9.334236 | 6.802354 | 8.033015 | 7.986432  |
| ENSMUSG Zan       | 0.194825 | 0.205984 | 0.128813 | 0.230281 | 0.151371 | 0.138992  |
| ENSMUSG Gm13941   | 0        | 0        | 0        | 0        | 0        | 0         |
| ENSMUSG Fam228a   | 0        | 0.046518 | 0.061051 | 0        | 0.009799 | 0         |
| ENSMUSG Gm11060   | 0        | 0        | 0        | 0        | 0        | 0         |
| ENSMUSG Fam163a   | 0        | 0        | 0        | 0        | 0        | 0         |
| Mus_musc Mus_musc | 1.94023  | 1.969928 | 1.924345 | 2.067941 | 1.821358 | 1.547372  |
| ENSMUSG Cacfd1    | 14.159   | 13.62682 | 14.09607 | 13.47438 | 14.84284 | 13.548806 |
| ENSMUSG Vmn1r216  | 0        | 0        | 0        | 0        | 0        | 0         |
| ENSMUSG Fmc1      | 6.568146 | 5.426596 | 7.120712 | 11.63547 | 6.347929 | 6.560721  |
| ENSMUSG Ifit1bl2  | 1.106983 | 1.519797 | 1.432888 | 0.829203 | 0.717637 | 0.601732  |
| ENSMUSG THSD8     | 0.023105 | 0.01015  | 0.019839 | 0        | 0.000454 | 0.013168  |
| ENSMUSG Myo9a     | 8.851588 | 9.694471 | 7.16161  | 6.43255  | 6.524716 | 6.585878  |
| ENSMUSG Mdc1      | 6.199373 | 5.846134 | 5.355718 | 5.035498 | 5.209655 | 5.234117  |
| ENSMUSG Klre1     | 0.599108 | 0.440968 | 3.57531  | 1.694191 | 0.191475 | 0.548284  |
| ENSMUSG Gabra2    | 0        | 0        | 0        | 0        | 0        | 0         |
| ENSMUSG Atp5f1    | 71.82525 | 73.96504 | 69.25768 | 85.7907  | 88.6852  | 86.21611  |
| ENSMUSG Adora3    | 1.147203 | 1.013363 | 0.903987 | 2.055593 | 2.648826 | 3.693051  |
| ENSMUSG Heatr1    | 4.809223 | 5.057076 | 4.579166 | 5.740578 | 5.797651 | 5.90848   |
| ENSMUSG Sox9      | 0.130781 | 0.256672 | 0.057279 | 0.499029 | 0.453254 | 0.643471  |
| ENSMUSG Hnrnpd    | 26.26214 | 22.45194 | 21.90268 | 25.49323 | 22.19816 | 21.172738 |
| ENSMUSG Myo1a     | 0.014889 | 0        | 0        | 0.210248 | 0.166599 | 0.224174  |
| ENSMUSG Tac2      | 0        | 0        | 0        | 0        | 0        | 0         |
| ENSMUSG Gak       | 30.46066 | 29.30934 | 29.90918 | 29.23292 | 30.19596 | 31.486797 |

|                   |          |          |          |          |          |           |
|-------------------|----------|----------|----------|----------|----------|-----------|
| ENSMUSG Rapgef2   | 11.08154 | 10.5157  | 10.90216 | 7.736697 | 7.748317 | 7.56129   |
| ENSMUSG Abcd1     | 14.82634 | 15.65771 | 15.6954  | 15.70289 | 16.56052 | 17.663096 |
| ENSMUSG Pir       | 11.80335 | 14.06728 | 9.710342 | 9.27201  | 8.60075  | 6.611372  |
| ENSMUSG Pik3r1    | 24.38899 | 26.51327 | 23.51671 | 18.89133 | 18.90408 | 17.802113 |
| ENSMUSG Dicer1    | 11.13456 | 10.68742 | 9.803126 | 9.284324 | 8.902227 | 8.636372  |
| ENSMUSG Zrsr2     | 8.815462 | 8.818268 | 8.349161 | 8.632425 | 7.755217 | 7.00563   |
| ENSMUSG Haus7     | 6.963295 | 6.837466 | 7.832478 | 8.052431 | 7.753652 | 7.878155  |
| ENSMUSG Trex2     | 0        | 0        | 0        | 0.051332 | 0        | 0         |
| ENSMUSG Car5b     | 1.742793 | 2.710068 | 1.821472 | 2.144005 | 2.273941 | 2.168262  |
| ENSMUSG Zfp92     | 0.017933 | 0.037567 | 0.014969 | 0.041943 | 0.018647 | 0.019163  |
| ENSMUSG Bgn       | 232.7177 | 210.1926 | 252.2407 | 215.6558 | 218.0071 | 213.18312 |
| ENSMUSG Atp2b3    | 0        | 0        | 0        | 0.01685  | 0        | 0.023594  |
| ENSMUSG Bmx       | 4.438074 | 4.846005 | 3.065896 | 2.54605  | 2.383387 | 2.606281  |
| ENSMUSG Gm21954   | 0        | 0        | 0        | 0        | 0        | 0         |
| ENSMUSG Zbtb20    | 9.491204 | 10.85153 | 6.567911 | 7.071063 | 7.110358 | 6.540056  |
| ENSMUSG Slc25a41  | 0        | 0        | 0        | 0        | 0        | 0.038491  |
| ENSMUSG 4930548H  | 0        | 0.052863 | 0        | 0        | 0        | 0         |
| ENSMUSG Ccdc191   | 2.608089 | 3.322163 | 2.102072 | 2.790137 | 2.522603 | 2.61194   |
| ENSMUSG Rbks      | 2.633433 | 1.855052 | 2.136507 | 3.564409 | 3.215337 | 2.881666  |
| ENSMUSG Fosl2     | 16.25553 | 15.05189 | 13.59756 | 10.06945 | 12.09782 | 12.049449 |
| ENSMUSG Hira      | 14.05161 | 13.22047 | 13.33782 | 11.39378 | 11.12527 | 11.529334 |
| ENSMUSG Drd3      | 0        | 0        | 0        | 0        | 0        | 0         |
| ENSMUSG Qtrt2     | 4.929522 | 4.985117 | 5.291799 | 3.979367 | 3.577692 | 4.113775  |
| ENSMUSG Gbe1      | 10.62498 | 8.68083  | 9.252702 | 6.215262 | 5.934794 | 4.781792  |
| ENSMUSG Rnf32     | 2.264542 | 2.062823 | 2.014866 | 1.969142 | 3.0541   | 2.300987  |
| ENSMUSG Ankrd35   | 0.142555 | 0.165941 | 0.329832 | 0.16066  | 0.251607 | 0.374516  |
| ENSMUSG Camp      | 0        | 0.365212 | 0.699592 | 0.37076  | 0.465253 | 0.380036  |
| ENSMUSG Sgsm2     | 5.534125 | 5.181904 | 5.611069 | 5.087371 | 4.500902 | 5.495552  |
| ENSMUSG Arl5c     | 1.611884 | 0.904724 | 2.001112 | 2.472111 | 2.067674 | 2.712924  |
| ENSMUSG Hus1      | 6.656332 | 7.768502 | 6.280085 | 5.391881 | 5.787413 | 4.701334  |
| ENSMUSG Ascc2     | 20.0385  | 20.61722 | 15.71754 | 17.39843 | 17.34838 | 17.416814 |
| ENSMUSG Nipal4    | 0.083096 | 0.09212  | 0.02899  | 0.147439 | 0.084673 | 0.085141  |
| ENSMUSG Eloa      | 15.62717 | 15.86608 | 15.73161 | 14.60878 | 15.09849 | 15.984001 |
| ENSMUSG Pithd1    | 12.58969 | 12.91718 | 12.00525 | 9.361543 | 11.63159 | 11.829823 |
| ENSMUSG Pttg1     | 2.102037 | 2.192852 | 2.104067 | 4.351616 | 4.483503 | 4.226979  |
| ENSMUSG Ephb2     | 0.158021 | 0.21915  | 0.166645 | 0.236611 | 0.207362 | 0.239122  |
| ENSMUSG Hormad2   | 0.025497 | 0        | 0.093005 | 0        | 0.028445 | 0         |
| ENSMUSG Epha8     | 0.315181 | 0.273553 | 0.472863 | 0.106669 | 0.136345 | 0.11231   |
| Mus_musc Mus_musc | 0        | 0        | 0        | 0        | 0.162991 | 0         |
| Mus_musc Mus_musc | 0        | 0        | 0        | 0        | 0        | 0         |
| Mus_musc Mus_musc | 0.342606 | 0.214267 | 0.392792 | 0.395332 | 0.153369 | 0.19325   |
| ENSMUSG Gm5580    | 0.057017 | 0.016994 | 0.037211 | 0        | 0        | 0         |
| ENSMUSG Acadm     | 30.28519 | 36.40826 | 30.11854 | 32.94309 | 33.15755 | 31.284722 |
| ENSMUSG Kih124    | 22.7781  | 25.03554 | 19.48688 | 22.7025  | 23.95276 | 20.590929 |
| ENSMUSG Hdac10    | 5.729209 | 4.320955 | 5.353389 | 5.419943 | 4.924592 | 4.627371  |
| ENSMUSG Vmn1r32   | 0        | 0        | 0        | 0        | 0        | 0         |
| ENSMUSG Slc17a5   | 9.519296 | 8.890808 | 8.576025 | 10.26736 | 10.56413 | 10.62153  |
| ENSMUSG Lmtk2     | 13.08311 | 13.58913 | 11.68811 | 12.1162  | 12.31445 | 13.245937 |
| ENSMUSG Cldnd2    | 0.257697 | 0.109049 | 0.447783 | 0.137064 | 0        | 0         |
| ENSMUSG Rabggtb   | 13.6743  | 15.07955 | 14.13142 | 14.82168 | 14.68941 | 15.581748 |
| ENSMUSG Ppp1r9b   | 50.23292 | 48.51627 | 53.36794 | 42.94281 | 45.519   | 44.891641 |
| ENSMUSG Slc16a3   | 3.807647 | 4.071229 | 4.300459 | 6.063845 | 4.924824 | 4.94553   |
| ENSMUSG Csnk1d    | 51.53418 | 49.73069 | 52.87227 | 42.44893 | 44.68999 | 44.783322 |
| ENSMUSG Pnpo      | 10.44253 | 9.917306 | 10.42731 | 10.59757 | 10.80195 | 12.636237 |
| ENSMUSG Sectm1a   | 0        | 0.108527 | 0.140281 | 0.269317 | 0.166831 | 0.224137  |
| ENSMUSG Ogfod3    | 8.318569 | 9.171901 | 8.238502 | 9.266117 | 7.043629 | 8.023491  |
| ENSMUSG Tada2a    | 4.741551 | 4.119065 | 4.438868 | 3.693576 | 2.836854 | 4.056272  |
| ENSMUSG Tcaf3     | 0        | 0.004862 | 0        | 0.009904 | 0        | 0         |
| ENSMUSG Ikzf1     | 7.983898 | 6.039606 | 10.25695 | 12.80166 | 11.67348 | 12.75996  |
| ENSMUSG Ppp2r1b   | 10.66975 | 9.888603 | 10.46543 | 9.037251 | 9.434827 | 9.894592  |
| ENSMUSG Cherp     | 15.32131 | 14.45348 | 14.16328 | 12.71481 | 13.13933 | 13.726382 |
| Mus_musc Mus_musc | 0        | 0        | 0        | 0        | 0.139656 | 0         |
| ENSMUSG Gm49392   | 5.961928 | 5.394245 | 5.768403 | 3.803119 | 5.095179 | 2.171789  |
| ENSMUSG Rdx       | 80.17189 | 82.68089 | 81.60734 | 56.84219 | 61.2685  | 57.453881 |

|                   |          |          |          |          |          |           |
|-------------------|----------|----------|----------|----------|----------|-----------|
| ENSMUSG Fdx1      | 49.55324 | 32.90474 | 30.80353 | 26.72456 | 38.76617 | 36.823081 |
| ENSMUSG Ube3c     | 10.87597 | 11.83113 | 10.13673 | 9.952906 | 10.54402 | 11.118174 |
| ENSMUSG Pou2af1   | 3.789778 | 3.402283 | 2.634688 | 30.20813 | 29.34031 | 29.04443  |
| ENSMUSG Tmem171   | 0.608956 | 0.720642 | 1.327849 | 2.950186 | 3.317655 | 2.977256  |
| ENSMUSG Cpq       | 25.40173 | 28.09973 | 29.26934 | 22.9849  | 22.3829  | 26.196917 |
| ENSMUSG Btg4      | 0.093003 | 0.475112 | 0        | 0.087711 | 0.368473 | 0.098414  |
| ENSMUSG Tlr4      | 8.662009 | 8.858301 | 7.469466 | 11.22675 | 12.43643 | 12.052506 |
| ENSMUSG Gmnc      | 0.390463 | 0.507886 | 0.337293 | 0.628272 | 0.400953 | 0.241553  |
| ENSMUSG AC117241  | 0        | 0        | 0        | 0        | 0        | 0         |
| ENSMUSG Trmt1l    | 13.07167 | 13.55036 | 13.51348 | 11.85598 | 10.50774 | 10.763327 |
| ENSMUSG Olfr1013  | 0        | 0        | 0        | 0        | 0        | 0         |
| ENSMUSG Ddx10     | 6.977781 | 6.512587 | 7.077145 | 7.105873 | 6.01289  | 6.432416  |
| ENSMUSG Zfp975    | 1.963612 | 2.499094 | 2.329355 | 1.39318  | 2.040213 | 1.655055  |
| ENSMUSG Olfr688   | 0        | 0        | 0        | 0        | 0        | 0         |
| ENSMUSG Riok1     | 7.652857 | 7.700497 | 8.17198  | 7.130285 | 7.262922 | 7.122963  |
| ENSMUSG Olfr703   | 0        | 0        | 0        | 0        | 0        | 0         |
| ENSMUSG Olfr704   | 0        | 0        | 0        | 0        | 0        | 0         |
| ENSMUSG Ly86      | 5.090777 | 5.886613 | 8.316233 | 21.42763 | 18.29988 | 15.610353 |
| ENSMUSG Mrpl27    | 21.57416 | 22.19027 | 24.05409 | 23.89171 | 23.51593 | 21.67345  |
| ENSMUSG Npc1      | 21.14668 | 21.36114 | 20.32236 | 23.76463 | 26.27464 | 28.756254 |
| ENSMUSG Il31ra    | 0.034796 | 0.057445 | 0.01974  | 0.241968 | 0.405454 | 0.326831  |
| ENSMUSG Ssr1      | 19.07065 | 18.36488 | 17.90723 | 17.1702  | 17.60057 | 17.730827 |
| ENSMUSG Rmc1      | 15.16367 | 14.39823 | 15.39699 | 13.58597 | 13.03136 | 13.086331 |
| ENSMUSG Plcx3     | 0.482827 | 0.384148 | 0.255549 | 0.254678 | 0.345144 | 0.36489   |
| ENSMUSG Olfr1258  | 0        | 0.011696 | 0        | 0        | 0        | 0         |
| ENSMUSG Ch25h     | 1.914439 | 1.641165 | 2.412408 | 11.77845 | 16.78157 | 13.00232  |
| ENSMUSG Cdk5r1    | 0.155106 | 0.241585 | 0.221622 | 0.707604 | 0.535803 | 0.806667  |
| ENSMUSG Zfp710    | 12.60857 | 10.44266 | 13.43111 | 11.63991 | 11.81529 | 11.363992 |
| ENSMUSG Chd8      | 13.72015 | 13.48258 | 13.24624 | 12.23841 | 12.74062 | 12.278773 |
| ENSMUSG Rimkla    | 0.146084 | 0.234948 | 0.165844 | 0.325096 | 0.400726 | 0.373992  |
| ENSMUSG Lipi      | 0        | 0        | 0        | 0        | 0        | 0         |
| ENSMUSG Rasgrp2   | 39.9227  | 33.40734 | 48.52676 | 23.92981 | 23.25806 | 23.181899 |
| ENSMUSG Ucp3      | 1.499105 | 1.766457 | 1.274204 | 1.682867 | 1.908716 | 1.491999  |
| ENSMUSG Rbm11     | 0.08246  | 0.057344 | 0.084124 | 0.049737 | 0.096424 | 0.04762   |
| ENSMUSG 1520401A  | 0        | 0        | 0        | 0        | 0.013379 | 0         |
| ENSMUSG Apmmap    | 26.33304 | 24.70015 | 26.91349 | 25.53226 | 24.48422 | 26.976992 |
| ENSMUSG Nol12     | 5.632726 | 4.543138 | 7.017614 | 7.068366 | 7.640025 | 6.258538  |
| ENSMUSG Paxip1    | 6.810813 | 7.017298 | 6.310397 | 6.414828 | 6.443265 | 5.941045  |
| ENSMUSG H2-M10.4  | 0        | 0        | 0        | 0        | 0        | 0         |
| ENSMUSG Fbxo43    | 0.01398  | 0.040958 | 0        | 0.070814 | 0.027668 | 0.091933  |
| ENSMUSG Cdip1     | 18.50424 | 16.49283 | 16.4495  | 13.22388 | 14.10066 | 14.194911 |
| ENSMUSG Hmox2     | 27.41158 | 29.42467 | 28.88746 | 33.77134 | 34.81741 | 37.396087 |
| ENSMUSG Rnf149    | 12.06673 | 11.38061 | 12.15223 | 23.92206 | 22.09274 | 24.933497 |
| ENSMUSG Ovch2     | 0        | 0        | 0        | 0        | 0        | 0         |
| Mus_musc Mus_musc | 0        | 0.059673 | 0        | 0.219669 | 0.19369  | 0         |
| Mus_musc Mus_musc | 0        | 0.142702 | 0        | 0.172091 | 0.211061 | 0         |
| Mus_musc Mus_musc | 0        | 0.003951 | 0        | 0.171597 | 0.137663 | 0.075992  |
| ENSMUSG Gm10401   | 0        | 0        | 0        | 0        | 0        | 0         |
| ENSMUSG 1500011B  | 7.442696 | 6.416786 | 7.265624 | 12.67198 | 10.28575 | 9.45633   |
| ENSMUSG Idh2      | 76.62777 | 74.10437 | 69.0659  | 58.71346 | 59.74348 | 62.866369 |
| ENSMUSG Mesp2     | 1.230426 | 1.491101 | 0.511675 | 1.114813 | 1.165195 | 1.188115  |
| ENSMUSG Mesp1     | 0.381814 | 0.680171 | 0.710857 | 0.479875 | 0.72993  | 0.567149  |
| ENSMUSG Pex11a    | 8.306525 | 8.534659 | 6.990911 | 7.008906 | 5.953328 | 5.314197  |
| ENSMUSG Plin1     | 0.920088 | 2.63035  | 0.129137 | 1.305721 | 0.408687 | 0.650488  |
| ENSMUSG Rhcg      | 0        | 0        | 0        | 0        | 0        | 0         |
| ENSMUSG Garem2    | 0.014595 | 0        | 0        | 0.013462 | 0.012511 | 0.014153  |
| ENSMUSG Cfap97    | 7.306221 | 7.523867 | 6.566571 | 6.341048 | 7.651221 | 6.935455  |
| ENSMUSG Slc25a4   | 73.171   | 79.52927 | 71.76865 | 69.00518 | 63.86639 | 64.270569 |
| ENSMUSG Anxa10    | 0        | 0        | 0        | 0        | 0        | 0         |
| ENSMUSG Ufsp2     | 11.46491 | 13.38837 | 13.24804 | 15.97927 | 17.81591 | 16.01429  |
| ENSMUSG Lrp2bp    | 0.427842 | 0.363414 | 0.193086 | 0.31824  | 0.178805 | 0.324278  |
| ENSMUSG Pdlim3    | 9.446713 | 8.822737 | 8.005695 | 5.455532 | 6.175253 | 6.930175  |
| ENSMUSG Tlr3      | 7.192017 | 7.957933 | 7.696772 | 6.205466 | 6.372652 | 6.01159   |
| ENSMUSG Gzma      | 23.69764 | 16.46067 | 126.0768 | 27.5132  | 11.0914  | 20.047005 |

|                   |          |          |          |          |          |           |
|-------------------|----------|----------|----------|----------|----------|-----------|
| ENSMUSG Rpl23     | 146.0497 | 152.4297 | 171.3925 | 185.9244 | 172.7679 | 163.1972  |
| ENSMUSG Lyl1      | 4.639686 | 4.353311 | 7.267477 | 8.535706 | 6.57402  | 7.875011  |
| ENSMUSG Galnt17   | 0.134288 | 0.152217 | 0.113023 | 0.190141 | 0.180957 | 0.279853  |
| ENSMUSG Gppp111   | 23.71751 | 24.18469 | 23.26323 | 20.96891 | 21.69281 | 19.790932 |
| ENSMUSG Xlr3b     | 0.942141 | 0.249322 | 0        | 0.108983 | 1.722348 | 0.118708  |
| ENSMUSG Gfi1      | 0.319456 | 0.228119 | 0.49583  | 0.701509 | 0.842902 | 0.496208  |
| ENSMUSG Glmn      | 1.994591 | 1.503526 | 1.615849 | 1.913661 | 1.45135  | 1.705594  |
| ENSMUSG Fam69a    | 6.752332 | 5.971483 | 7.180454 | 6.516026 | 7.468359 | 6.647186  |
| ENSMUSG Sult1e1   | 0        | 0        | 0        | 0.029143 | 0        | 0         |
| ENSMUSG Sult1d1   | 2.515659 | 4.880126 | 0.991104 | 1.982957 | 1.379055 | 1.020331  |
| ENSMUSG Brdt      | 0.32534  | 0.268586 | 0.241637 | 0.232217 | 0.302249 | 0.282005  |
| Mus_musc Mus_musc | 0.140308 | 0        | 0        | 0.248216 | 0.149733 | 0.21691   |
| Mus_musc Mus_musc | 2.512624 | 1.935992 | 1.882949 | 1.627412 | 1.371576 | 1.733866  |
| Mus_musc Mus_musc | 0        | 0        | 0        | 0        | 0.186692 | 0         |
| Mus_musc Mus_musc | 0.138669 | 0        | 0.164862 | 1.028116 | 1.236361 | 1.067187  |
| Mus_musc Mus_musc | 0.191679 | 0.291863 | 0.169663 | 0.870934 | 0.719283 | 0.683398  |
| Mus_musc Mus_musc | 0        | 0        | 0        | 0        | 0.321941 | 0.500987  |
| ENSMUSG Pkhd1     | 0.047389 | 0.06034  | 0.024005 | 0.040884 | 0.04086  | 0.028308  |
| Mus_musc Mus_musc | 38.55137 | 41.14467 | 32.68794 | 30.62656 | 26.91365 | 28.932982 |
| Mus_musc Mus_musc | 0        | 0        | 0        | 0        | 0        | 0.270502  |
| Mus_musc Mus_musc | 0.3655   | 0.1173   | 0.664706 | 0.698838 | 0.37501  | 0.630196  |
| Mus_musc Mus_musc | 0.472063 | 0.474179 | 0.465931 | 0.344813 | 0.201055 | 0.367951  |
| Mus_musc Mus_musc | 39.44989 | 43.26273 | 37.43203 | 33.97289 | 31.36532 | 35.227302 |
| ENSMUSG Oser1     | 22.78059 | 22.26992 | 22.90414 | 18.98753 | 17.98838 | 14.962142 |
| ENSMUSG Klf16     | 5.985259 | 6.071095 | 6.174667 | 4.966098 | 5.333715 | 5.519412  |
| ENSMUSG Cfap53    | 1.589074 | 2.019016 | 1.286823 | 2.571542 | 2.17441  | 1.813717  |
| ENSMUSG Pet2      | 0        | 0        | 0        | 0        | 0        | 0         |
| ENSMUSG Dennd1a   | 7.391298 | 7.005707 | 6.945304 | 7.158666 | 6.837648 | 7.252404  |
| ENSMUSG Brsk1     | 1.930339 | 1.799818 | 2.162022 | 1.308612 | 1.602845 | 1.295963  |
| ENSMUSG Vmn1r188  | 0        | 0        | 0        | 0.003081 | 0        | 0         |
| ENSMUSG Vmn1r199  | 0        | 0        | 0        | 0        | 0        | 0         |
| ENSMUSG Vmn1r195  | 0        | 0        | 0        | 0        | 0        | 0         |
| ENSMUSG Vmn1r194  | 0        | 0        | 0        | 0        | 0        | 0         |
| ENSMUSG Vmn1r197  | 0        | 0        | 0        | 0        | 0        | 0         |
| ENSMUSG Vmn1r196  | 0        | 0        | 0        | 0        | 0        | 0         |
| ENSMUSG Tifa      | 3.742703 | 3.978565 | 4.688134 | 8.057588 | 7.852319 | 6.442539  |
| Mus_musc Mus_musc | 0        | 0        | 0        | 0        | 0        | 0         |
| Mus_musc Mus_musc | 2.9747   | 3.679783 | 3.041885 | 2.185588 | 1.98375  | 1.58759   |
| Mus_musc Mus_musc | 0        | 0        | 0.352431 | 0.090601 | 0        | 0         |
| Mus_musc Mus_musc | 0        | 0        | 0.376534 | 0        | 0        | 0         |
| Mus_musc Mus_musc | 0        | 0        | 0        | 0.174016 | 0        | 0         |
| ENSMUSG Epgn      | 0.095763 | 0        | 0.028796 | 0        | 0.063827 | 0         |
| ENSMUSG Baz1a     | 10.16076 | 10.50417 | 9.728681 | 10.35593 | 10.63666 | 11.18466  |
| ENSMUSG Ncapd3    | 4.467165 | 4.631628 | 4.081643 | 4.520529 | 4.540156 | 4.44907   |
| ENSMUSG 6030408B  | 3.766548 | 4.312849 | 4.752862 | 3.592351 | 4.461904 | 4.99149   |
| ENSMUSG Map2k2    | 34.57664 | 30.7384  | 31.56219 | 33.57146 | 37.14565 | 31.975396 |
| ENSMUSG 9430097D  | 0        | 0        | 0        | 0        | 0        | 0         |
| ENSMUSG Krt76     | 0        | 0        | 0        | 0.123103 | 0        | 0.143796  |
| ENSMUSG Lingo2    | 0        | 0        | 0        | 0        | 0        | 0         |
| ENSMUSG S1pr5     | 1.549003 | 0.9303   | 3.626924 | 1.228206 | 0.480322 | 0.812556  |
| Mus_musc Mus_musc | 2.221669 | 3.430201 | 2.462441 | 2.420477 | 1.778261 | 2.121112  |
| Mus_musc Mus_musc | 0        | 0        | 0.091813 | 0.317769 | 0.363915 | 0.196198  |
| ENSMUSG Khl31     | 0.008686 | 0.091554 | 0.007804 | 0.065651 | 0.008653 | 0.017018  |
| Mus_musc Mus_musc | 0.420687 | 1.033186 | 0.670239 | 1.263522 | 0.448136 | 0.240263  |
| Mus_musc Mus_musc | 0        | 0.234832 | 0.19598  | 0        | 0.17466  | 0         |
| Mus_musc Mus_musc | 0.225594 | 0        | 0        | 0.565243 | 0.153981 | 0.13263   |
| ENSMUSG Sstr3     | 0        | 0.016676 | 0        | 0.007246 | 0.032645 | 0.070012  |
| ENSMUSG Ttc41     | 0.781498 | 0.464872 | 0.544848 | 1.169395 | 0.737083 | 0.840966  |
| ENSMUSG Zfp367    | 10.2265  | 9.434375 | 9.012794 | 7.576951 | 7.86466  | 7.372911  |
| Mus_musc Mus_musc | 1.029133 | 0.469694 | 0.48534  | 1.003187 | 0.683337 | 1.003454  |
| ENSMUSG Scgb2b3   | 0        | 0        | 0        | 0        | 0        | 0         |
| ENSMUSG Scgb1b29  | 0        | 0        | 0        | 0        | 0        | 0         |
| ENSMUSG Scgb1b24  | 0        | 0        | 0        | 0        | 0        | 0         |
| ENSMUSG Tsacc     | 0.891763 | 1.415276 | 0.78722  | 1.036475 | 0.973791 | 0.691456  |

|                   |          |          |          |          |          |           |
|-------------------|----------|----------|----------|----------|----------|-----------|
| ENSMUSG Dgkq      | 3.660782 | 3.221613 | 3.014369 | 3.109172 | 2.744079 | 3.09384   |
| ENSMUSG Ccl24     | 0.504418 | 0.421938 | 0.46115  | 9.946141 | 13.49044 | 19.010645 |
| ENSMUSG Scgb1b7   | 0        | 0        | 0        | 0        | 0        | 0         |
| Mus_musc Mus_musc | 0        | 0        | 0        | 0        | 0        | 0         |
| Mus_musc Mus_musc | 0.557177 | 0.739859 | 0.175603 | 0.744254 | 0.160843 | 0.304185  |
| ENSMUSG Zfp423    | 0.769293 | 1.009501 | 0.867093 | 0.731066 | 0.835721 | 0.924347  |
| Mus_musc Mus_musc | 0.034312 | 0.27981  | 0.261419 | 0.37689  | 0.191916 | 0.247148  |
| ENSMUSG 4933402E1 | 0        | 0        | 0        | 0        | 0        | 0         |
| ENSMUSG Defb11    | 0        | 0        | 0        | 0        | 0        | 0         |
| ENSMUSG Hsfy2     | 0        | 0        | 0        | 0        | 0        | 0         |
| Mus_musc Mus_musc | 2.13352  | 1.851558 | 1.472807 | 1.721616 | 1.720396 | 2.175562  |
| ENSMUSG Idi1      | 20.83481 | 18.80904 | 21.18664 | 26.38702 | 23.30089 | 28.096971 |
| ENSMUSG Tcp11x2   | 0        | 0        | 0        | 0        | 0        | 0         |
| ENSMUSG Tas2r138  | 0        | 0        | 0        | 0        | 0        | 0         |
| ENSMUSG Olfr822   | 0        | 0        | 0        | 0        | 0        | 0         |
| ENSMUSG Tspan7    | 343.2692 | 337.9642 | 364.5778 | 214.4803 | 233.0062 | 193.30817 |
| ENSMUSG 1110059G  | 3.422341 | 2.938856 | 3.058121 | 3.442946 | 3.104553 | 2.78358   |
| ENSMUSG Srprb     | 18.54792 | 19.93985 | 19.48202 | 19.66759 | 20.60272 | 21.810682 |
| ENSMUSG Topbp1    | 8.365423 | 9.277582 | 8.859905 | 8.513671 | 9.855929 | 9.908712  |
| ENSMUSG Trf       | 117.5012 | 131.6935 | 96.78631 | 162.4445 | 163.1558 | 179.97836 |
| ENSMUSG Uba5      | 16.16319 | 15.19361 | 15.8792  | 19.2341  | 21.87193 | 19.628229 |
| ENSMUSG Bfsp2     | 0.052269 | 0        | 0.078776 | 0.327301 | 0.256112 | 0.340113  |
| ENSMUSG Nphp3     | 1.891667 | 1.916059 | 1.459355 | 1.877879 | 1.433154 | 1.538131  |
| ENSMUSG Cnpy1     | 0.09333  | 0.024031 | 0.038092 | 0.017298 | 0.063777 | 0.103317  |
| ENSMUSG Fbxo9     | 29.76028 | 25.51408 | 25.40945 | 21.56503 | 22.93778 | 25.411353 |
| ENSMUSG Rbm48     | 3.517378 | 3.922208 | 4.207768 | 3.16182  | 3.259813 | 3.257519  |
| ENSMUSG Cby3      | 0        | 0.038457 | 0.039056 | 0        | 0.1231   | 0.036535  |
| ENSMUSG Olfr622   | 0        | 0        | 0        | 0        | 0        | 0         |
| ENSMUSG Gm5795    | 0        | 0        | 0        | 0        | 0        | 0         |
| ENSMUSG Dnajc18   | 6.784119 | 6.891734 | 6.173082 | 5.566446 | 5.73083  | 5.412435  |
| ENSMUSG Spata24   | 5.062763 | 5.723739 | 3.618799 | 6.106073 | 5.915808 | 5.379332  |
| ENSMUSG Mzb1      | 4.174922 | 3.31799  | 2.117582 | 168.4001 | 160.3998 | 161.57958 |
| ENSMUSG Gm3020    | 0        | 0        | 0        | 0        | 0        | 0         |
| ENSMUSG Hspa9     | 47.85629 | 47.53041 | 48.92804 | 42.93803 | 45.46248 | 48.15493  |
| ENSMUSG Akap4     | 0        | 0        | 0        | 0        | 0        | 0         |
| ENSMUSG 1600012H  | 14.87791 | 15.80412 | 15.78459 | 15.56189 | 15.89841 | 15.512878 |
| ENSMUSG Esam      | 124.216  | 112.761  | 125.8417 | 76.83202 | 83.00043 | 76.465917 |
| Mus_musc Mus_musc | 0        | 0        | 0        | 0        | 0        | 0         |
| Mus_musc Mus_musc | 0.235839 | 0.159558 | 0        | 0.079462 | 0.435615 | 0.184969  |
| ENSMUSG Siae      | 4.448196 | 4.275976 | 4.283834 | 4.741402 | 4.282043 | 5.002656  |
| ENSMUSG Vsig2     | 16.12838 | 17.32951 | 13.94249 | 11.92031 | 11.57039 | 13.279133 |
| Mus_musc Mus_musc | 0        | 0        | 0        | 0        | 0        | 0.052115  |
| Mus_musc Mus_musc | 1.158871 | 1.514322 | 1.283648 | 1.590244 | 0.828841 | 1.393866  |
| Mus_musc Mus_musc | 0        | 0        | 0        | 0.337506 | 0        | 0.108185  |
| Mus_musc Mus_musc | 0.337855 | 0.346318 | 0.608021 | 0.458574 | 0.355664 | 0.528267  |
| Mus_musc Mus_musc | 10.03628 | 10.34606 | 10.23325 | 8.585647 | 7.524276 | 6.104305  |
| Mus_musc Mus_musc | 0        | 0        | 0        | 0.835642 | 0.355712 | 0.248701  |
| ENSMUSG BC048679  | 0        | 0        | 0        | 0        | 0        | 0         |
| ENSMUSG Olfr1148  | 0        | 0        | 0        | 0        | 0        | 0         |
| ENSMUSG Cdc42ep5  | 6.92541  | 8.727095 | 9.085572 | 7.191712 | 5.436631 | 5.388501  |
| ENSMUSG Sphk1     | 16.49196 | 17.50373 | 14.97286 | 10.76798 | 10.68228 | 8.086484  |
| Mus_musc Mus_musc | 0        | 0        | 0        | 0        | 0        | 0         |
| ENSMUSG Pex5      | 10.4795  | 11.08035 | 12.02441 | 10.69177 | 10.47362 | 10.475967 |
| ENSMUSG Cyct      | 0        | 0        | 0        | 0        | 0        | 0         |
| ENSMUSG Unc80     | 0.060997 | 0.0741   | 0.039687 | 0.063903 | 0.074921 | 0.070289  |
| ENSMUSG Spink5    | 0        | 0.008836 | 0.009956 | 0        | 0        | 0.022634  |
| ENSMUSG Zfp459    | 1.168718 | 1.345879 | 0.982606 | 0.674404 | 0.946005 | 0.947836  |
| Mus_musc Mus_musc | 0.094697 | 0        | 0        | 0.08953  | 0.186692 | 0.09276   |
| Mus_musc Mus_musc | 0.12288  | 0        | 0.420859 | 0        | 0        | 0         |
| Mus_musc Mus_musc | 0        | 0        | 0.143436 | 0        | 0        | 0.083405  |
| Mus_musc Mus_musc | 0.116798 | 0        | 0.441079 | 0.336751 | 0.369243 | 0.307082  |
| Mus_musc Mus_musc | 3.159918 | 3.016769 | 2.599056 | 1.797278 | 2.363509 | 1.322581  |
| Mus_musc Mus_musc | 0.143006 | 0.546486 | 0.507038 | 0.220678 | 0.428389 | 0         |
| Mus_musc Mus_musc | 0        | 0.056147 | 0        | 1.876192 | 2.320251 | 2.270886  |



|                   |          |          |          |          |          |           |
|-------------------|----------|----------|----------|----------|----------|-----------|
| Mus_musc Mus_musc | 0        | 0        | 0        | 0        | 0.186692 | 0         |
| ENSMUSG Tuba3b    | 0        | 0        | 0        | 0        | 0.027872 | 0.03113   |
| ENSMUSG Bmpr2     | 102.0979 | 99.82102 | 83.67336 | 55.39398 | 61.56615 | 51.772026 |
| ENSMUSG Trappc2l  | 13.46958 | 13.18563 | 13.86188 | 14.31721 | 14.31752 | 15.859391 |
| ENSMUSG Olfr222   | 0        | 0        | 0        | 0        | 0        | 0         |
| ENSMUSG Serpinb1b | 0.844368 | 0.719594 | 0.942796 | 0.781981 | 0.35313  | 0.254994  |
| ENSMUSG Cyp3a11   | 0        | 0        | 0        | 0        | 0        | 0         |
| ENSMUSG Hs3st1    | 18.99296 | 17.68019 | 19.57211 | 12.42753 | 15.70311 | 9.886741  |
| ENSMUSG Gal3st3   | 0.345619 | 0.55471  | 0.183173 | 0.147134 | 0.266968 | 0.297239  |
| ENSMUSG Trpt1     | 4.20438  | 3.39971  | 4.484838 | 3.659119 | 4.187152 | 4.674825  |
| ENSMUSG Tssk6     | 0.740635 | 0.581844 | 0.478484 | 0.561573 | 0.636068 | 0.70082   |
| ENSMUSG Vmn1r74   | 0        | 0        | 0        | 0        | 0        | 0         |
| Mus_musc Mus_musc | 0.295711 | 0.291547 | 0.193855 | 0.18836  | 0        | 0.231331  |
| Mus_musc Mus_musc | 0.188031 | 0        | 0        | 0        | 0        | 0         |
| Mus_musc Mus_musc | 0        | 0        | 0.075224 | 0.13987  | 0        | 0         |
| Mus_musc Mus_musc | 0.432801 | 0.565501 | 0.238382 | 1.510814 | 0.936513 | 0.89201   |
| ENSMUSG Gm13539   | 0        | 0        | 0        | 0        | 0        | 0         |
| ENSMUSG Gm11634   | 0.03416  | 0        | 0        | 0        | 0        | 0         |
| Mus_musc Mus_musc | 0        | 0.385993 | 0        | 0        | 0        | 0         |
| Mus_musc Mus_musc | 0        | 0.19689  | 0.20878  | 0.045556 | 0.143101 | 0         |
| Mus_musc Mus_musc | 0.289473 | 0.26813  | 0        | 0.205931 | 0        | 0.241143  |
| Mus_musc Mus_musc | 0        | 0        | 0.089398 | 0        | 0.244807 | 0         |
| Mus_musc Mus_musc | 0.112304 | 0.358505 | 0        | 0        | 0        | 0.074179  |
| Mus_musc Mus_musc | 0.335784 | 0.261645 | 0.381845 | 0.32756  | 0        | 0.663635  |
| Mus_musc Mus_musc | 0        | 0        | 0        | 0        | 0        | 0         |
| Mus_musc Mus_musc | 0.145262 | 0.136774 | 0.399372 | 0.285436 | 0.248687 | 0.52421   |
| Mus_musc Mus_musc | 0.395393 | 0        | 0        | 0.174016 | 0        | 0         |
| Mus_musc Mus_musc | 25.7559  | 18.89718 | 17.20371 | 25.4034  | 14.96031 | 10.945727 |
| ENSMUSG Olfr1335  | 0        | 0        | 0        | 0        | 0        | 0         |
| Mus_musc Mus_musc | 0        | 0        | 0        | 0.348032 | 0        | 0         |
| ENSMUSG Olfr1358  | 0        | 0        | 0        | 0        | 0        | 0         |
| ENSMUSG Gm20812   | 0        | 0        | 0        | 0        | 0        | 0         |
| ENSMUSG Gm3147    | 0        | 0        | 0        | 0        | 0        | 0         |
| Mus_musc Mus_musc | 2.01919  | 1.844018 | 2.082977 | 2.113381 | 1.224799 | 1.245507  |
| ENSMUSG Ces1g     | 8.447753 | 7.918896 | 4.212014 | 1.187289 | 1.237032 | 1.13543   |
| ENSMUSG Spata45   | 0        | 0        | 0.033177 | 0        | 0        | 0.037835  |
| ENSMUSG Gm49318   | 0        | 0        | 0        | 0        | 0        | 0         |
| ENSMUSG 4930504O  | 0        | 0        | 0        | 0        | 0        | 0         |
| Mus_musc Mus_musc | 0.795789 | 0.774706 | 0.760225 | 0.266107 | 0.668556 | 0.63443   |
| Mus_musc Mus_musc | 0.298065 | 0.051208 | 0.291321 | 0.729579 | 0.082974 | 0.139436  |
| Mus_musc Mus_musc | 0        | 0        | 0        | 0        | 0        | 0         |
| Mus_musc Mus_musc | 1.448397 | 0.897238 | 0.894411 | 0.616173 | 0.77089  | 0.468752  |
| Mus_musc Mus_musc | 1.548448 | 1.438604 | 1.015297 | 0.946043 | 0.796348 | 1.536166  |
| Mus_musc Mus_musc | 0        | 0.323678 | 0        | 0.419134 | 0.19563  | 0.357861  |
| Mus_musc Mus_musc | 0.47131  | 0.508584 | 0.446776 | 0.267087 | 0.459578 | 0.547278  |
| ENSMUSG Phospho1  | 4.091228 | 4.120042 | 3.187219 | 3.282247 | 3.81352  | 2.627963  |
| ENSMUSG Olfr1494  | 0        | 0        | 0        | 0        | 0        | 0         |
| ENSMUSG Clrn3     | 0        | 0        | 0        | 0.015796 | 0.014687 | 0.016719  |
| ENSMUSG Dnajc14   | 28.92683 | 29.95618 | 28.44757 | 25.87606 | 24.68594 | 23.652483 |
| Mus_musc Mus_musc | 0.091419 | 0.556448 | 0.649839 | 0.313634 | 0.498479 | 0.349097  |
| Mus_musc Mus_musc | 0.056936 | 0.752364 | 0.27942  | 0.258838 | 0.517642 | 0.124047  |
| Mus_musc Mus_musc | 0.403253 | 0.229384 | 0.464937 | 2.42826  | 3.795443 | 3.359392  |
| Mus_musc Mus_musc | 14.35644 | 20.52055 | 18.69701 | 15.9753  | 17.43922 | 13.930804 |
| Mus_musc Mus_musc | 0        | 0        | 0        | 0        | 0        | 0.200545  |
| Mus_musc Mus_musc | 0        | 0        | 0.041713 | 0.233643 | 0.400428 | 0.301413  |
| ENSMUSG lft27     | 9.690914 | 8.222414 | 7.399285 | 9.285989 | 8.945968 | 9.23071   |
| ENSMUSG Gm42957   | 0.093294 | 0.117743 | 0.022644 | 0        | 0.083686 | 0.097509  |
| ENSMUSG Gm21190   | 0        | 0        | 0        | 0.132562 | 0        | 0         |
| ENSMUSG Kcnip1    | 0        | 0        | 0.043653 | 0.028103 | 0.025625 | 0         |
| ENSMUSG Nrd1      | 36.26225 | 39.71752 | 34.67002 | 34.61306 | 35.20985 | 33.443697 |
| ENSMUSG Hagh1     | 9.996387 | 8.948038 | 8.586024 | 7.477015 | 5.707626 | 7.170863  |
| ENSMUSG Gsr       | 16.68869 | 16.58207 | 15.11031 | 17.05883 | 17.66621 | 19.571358 |
| ENSMUSG Ifng      | 0.250916 | 0.229803 | 0.731824 | 0.48834  | 0.603261 | 0.394398  |
| ENSMUSG Cdh3      | 0.273684 | 0.355837 | 0.220958 | 0.607231 | 0.44365  | 0.5747    |

|                  |          |          |          |          |          |           |
|------------------|----------|----------|----------|----------|----------|-----------|
| ENSMUSG Zfp277   | 8.604829 | 8.66409  | 7.755001 | 9.23604  | 9.258361 | 8.282873  |
| ENSMUSG Tmem150  | 10.34375 | 8.804127 | 12.35209 | 10.20611 | 8.414767 | 9.995144  |
| ENSMUSG Cnr2     | 6.573751 | 6.000318 | 6.244017 | 7.5555   | 8.218256 | 7.915358  |
| ENSMUSG Timm17a  | 4.190763 | 4.112267 | 4.054734 | 3.760087 | 3.960994 | 3.707373  |
| ENSMUSG Atp13a2  | 38.69277 | 33.92633 | 38.17831 | 35.46008 | 36.63251 | 37.943216 |
| ENSMUSG Mgat4b   | 30.23277 | 26.83242 | 30.92567 | 27.34396 | 27.94424 | 31.179296 |
| ENSMUSG Ikzf4    | 0.843743 | 0.827231 | 0.938826 | 0.998957 | 0.783958 | 1.09513   |
| ENSMUSG Olfr1391 | 0        | 0        | 0        | 0        | 0        | 0         |
| ENSMUSG Vmn2r118 | 0        | 0        | 0        | 0        | 0        | 0         |
| ENSMUSG Ube2j2   | 17.21084 | 16.65046 | 18.31741 | 17.60036 | 14.74894 | 18.198804 |
| ENSMUSG Mrpl58   | 12.04408 | 10.65514 | 12.27503 | 11.82805 | 11.16945 | 11.897499 |
| ENSMUSG Fam186a  | 0        | 0.031574 | 0.010966 | 0        | 0.020893 | 0         |
| ENSMUSG Gm47841  | 0        | 0.099512 | 0.065911 | 0.037449 | 0        | 0         |
| ENSMUSG Saxo2    | 3.178609 | 3.547568 | 1.821373 | 6.084291 | 5.062673 | 3.876539  |
| ENSMUSG Bpifb5   | 3.62061  | 3.516074 | 2.700657 | 3.390927 | 2.953605 | 4.114487  |
| ENSMUSG Susd1    | 0.985524 | 1.024365 | 0.965577 | 1.365881 | 2.202743 | 2.213142  |
| ENSMUSG Rnf145   | 45.70434 | 47.08479 | 47.3973  | 37.55462 | 39.43202 | 36.073492 |
| ENSMUSG H13      | 37.89047 | 26.83928 | 25.5723  | 44.52239 | 60.32595 | 59.900883 |
| ENSMUSG Khlh3    | 0.747286 | 0.757128 | 0.487431 | 0.549262 | 0.786568 | 0.753852  |
| ENSMUSG Nepn     | 0        | 0        | 0        | 0        | 0        | 0         |
| ENSMUSG Ifna6    | 0        | 0        | 0        | 0        | 0        | 0         |
| ENSMUSG Vmn1r83  | 0        | 0        | 0        | 0        | 0        | 0         |
| ENSMUSG Vmn1r84  | 0        | 0        | 0        | 0        | 0        | 0         |
| ENSMUSG Rnasel   | 8.811069 | 9.957478 | 10.73156 | 8.845178 | 11.65483 | 11.96634  |
| ENSMUSG Mrpl48   | 7.210462 | 6.04563  | 6.240621 | 4.777483 | 4.463897 | 5.320666  |
| ENSMUSG Coro1a   | 63.07396 | 49.93804 | 84.53868 | 98.06925 | 75.77153 | 100.41154 |
| ENSMUSG Rab6a    | 53.88485 | 52.7478  | 49.77366 | 38.89753 | 39.16255 | 39.482674 |
| ENSMUSG Gdpd3    | 0.639602 | 0.555271 | 1.161514 | 0.577376 | 0.467219 | 0.666311  |
| ENSMUSG Plekhhb1 | 60.45088 | 65.59905 | 48.19533 | 40.35865 | 42.0765  | 41.202604 |
| ENSMUSG Dnajb13  | 2.831071 | 2.92115  | 2.389624 | 3.031722 | 3.889742 | 3.671504  |
| ENSMUSG Olfr1311 | 0        | 0        | 0        | 0        | 0        | 0         |
| ENSMUSG Slc39a4  | 18.96478 | 16.87955 | 16.93708 | 15.72277 | 18.11065 | 18.938967 |
| ENSMUSG Hs3st6   | 2.380957 | 2.336034 | 1.707669 | 1.479326 | 1.614442 | 1.165789  |
| ENSMUSG Strip2   | 0.63564  | 0.703858 | 0.386414 | 0.789202 | 0.681171 | 0.868999  |
| ENSMUSG Olfr874  | 0        | 0        | 0        | 0        | 0        | 0         |
| ENSMUSG Ap5z1    | 4.264725 | 3.772062 | 4.317646 | 4.122141 | 4.539104 | 4.462317  |
| ENSMUSG Trmt9b   | 0.666528 | 0.626495 | 0.545311 | 0.681119 | 0.602825 | 1.155766  |
| ENSMUSG Prex1    | 12.29467 | 10.99873 | 13.6389  | 18.55391 | 17.49031 | 19.226211 |
| ENSMUSG Mapk1    | 34.04306 | 34.55699 | 33.4236  | 30.92868 | 33.52925 | 33.191215 |
| ENSMUSG Dmrt2    | 0.387119 | 0.389751 | 0.145183 | 0.617398 | 0.636918 | 0.766802  |
| ENSMUSG Lrtm2    | 5.2844   | 6.050298 | 4.503068 | 2.650916 | 2.872363 | 2.06018   |
| ENSMUSG Olfr538  | 0        | 0        | 0        | 0        | 0        | 0         |
| ENSMUSG Galnt6   | 1.999631 | 1.981867 | 2.342023 | 5.317867 | 6.081254 | 7.110979  |
| ENSMUSG Stag1    | 12.73888 | 12.66431 | 11.23577 | 10.50872 | 10.79201 | 10.874822 |
| ENSMUSG Tbccl    | 15.80259 | 14.76793 | 12.25245 | 12.97237 | 12.28656 | 12.081895 |
| ENSMUSG Gm20441  | 0        | 0        | 0        | 0        | 0        | 0.013537  |
| ENSMUSG Gm5565   | 0        | 0        | 0        | 0        | 0        | 0         |
| ENSMUSG Olfr50   | 0        | 0        | 0        | 0        | 0        | 0         |
| ENSMUSG Tmed10   | 97.8047  | 99.553   | 97.50414 | 110.3425 | 108.4933 | 117.40559 |
| ENSMUSG Naaladl2 | 0.802953 | 0.753296 | 0.418465 | 0.663453 | 0.602758 | 0.532423  |
| ENSMUSG Isca2    | 15.42806 | 15.63491 | 18.36046 | 16.95356 | 15.77721 | 15.241763 |
| ENSMUSG Abcd4    | 5.869676 | 4.86452  | 5.981637 | 5.440326 | 5.327556 | 5.127341  |
| ENSMUSG Fcf1     | 17.45575 | 19.04333 | 23.74731 | 20.44655 | 17.28912 | 18.798504 |
| ENSMUSG Npc2     | 225.8284 | 256.392  | 231.0886 | 322.8174 | 329.9519 | 359.61017 |
| ENSMUSG Mlh3     | 3.731722 | 3.730191 | 3.334743 | 3.432996 | 3.241811 | 3.512497  |
| ENSMUSG Gm7694   | 3.47836  | 3.19977  | 2.670136 | 2.759613 | 2.76692  | 2.906504  |
| ENSMUSG Hmgb4    | 0        | 0        | 0        | 0        | 0        | 0         |
| ENSMUSG Sult3a2  | 0        | 0        | 0        | 0        | 0        | 0         |
| ENSMUSG Tas1r3   | 0.509716 | 0.632187 | 0.497101 | 0.497976 | 0.397015 | 0.602206  |
| ENSMUSG Cptp     | 7.544143 | 8.151334 | 8.023551 | 7.407497 | 7.646321 | 8.697858  |
| ENSMUSG Mxra8    | 82.65127 | 77.49225 | 88.25346 | 60.32793 | 62.2247  | 62.394781 |
| ENSMUSG Dvl1     | 20.88495 | 21.1007  | 24.68405 | 19.93617 | 19.21055 | 19.682127 |
| ENSMUSG Sdf4     | 45.22753 | 48.0781  | 45.83974 | 45.5333  | 47.19129 | 47.573593 |
| ENSMUSG Ttll10   | 0.653006 | 0.718723 | 0.56875  | 0.680943 | 0.756267 | 0.758137  |

|                   |          |          |          |          |          |           |
|-------------------|----------|----------|----------|----------|----------|-----------|
| ENSMUSG Tnfrsf4   | 0.648435 | 0.346222 | 0.898642 | 1.490288 | 2.037122 | 1.182726  |
| ENSMUSG Krt88     | 0        | 0.098881 | 0        | 0.057919 | 0.061265 | 0         |
| ENSMUSG Nr6a1     | 0.819068 | 1.152814 | 0.84685  | 0.974741 | 1.035908 | 1.103546  |
| ENSMUSG Slco1a5   | 0.782611 | 0.93457  | 0.334857 | 1.358503 | 1.859157 | 1.470113  |
| ENSMUSG Gm7173    | 0.245488 | 0.311586 | 0.156838 | 0.353135 | 0.255542 | 0.228491  |
| ENSMUSG Gpihbp1   | 191.4288 | 176.0552 | 216.4867 | 132.7274 | 140.3934 | 114.74152 |
| ENSMUSG Ly6h      | 0.034505 | 0.176569 | 0.068033 | 0        | 0        | 0.082718  |
| ENSMUSG Naprt     | 4.175386 | 4.100341 | 3.543986 | 4.683993 | 4.710068 | 5.629989  |
| ENSMUSG Gsdmd     | 19.34299 | 17.10967 | 26.18085 | 19.36911 | 15.81099 | 18.55582  |
| ENSMUSG Tsta3     | 13.55867 | 13.48333 | 13.6209  | 15.1129  | 15.2155  | 15.841703 |
| ENSMUSG Pycrl     | 7.329364 | 8.62968  | 9.05497  | 9.242415 | 8.84265  | 9.789635  |
| Mus_musc Mus_musc | 0.103897 | 0        | 0.455062 | 0        | 0        | 0.065267  |
| Mus_musc Mus_musc | 0        | 0        | 0.210972 | 0        | 0        | 0         |
| ENSMUSG Prl3c1    | 0        | 0        | 0        | 0        | 0        | 0         |
| ENSMUSG Phox2b    | 0        | 0        | 0        | 0        | 0.014375 | 0         |
| ENSMUSG Uba1y     | 0        | 0        | 0.012863 | 0        | 0        | 0         |
| ENSMUSG Rpl34     | 185.3108 | 191.4182 | 208.7769 | 244.1325 | 220.6148 | 214.4352  |
| ENSMUSG Hsh2d     | 0.928756 | 0.660129 | 1.328114 | 1.742267 | 0.900708 | 0.989345  |
| ENSMUSG Ankrd13d  | 1.74349  | 1.400903 | 1.840783 | 1.693347 | 1.985009 | 2.089683  |
| ENSMUSG Olfr1509  | 0        | 0        | 0        | 0        | 0        | 0         |
| ENSMUSG Rsf1      | 5.506984 | 5.873307 | 5.716527 | 4.974102 | 5.028216 | 4.905379  |
| ENSMUSG Nrcam     | 2.429096 | 2.02734  | 2.161567 | 3.440714 | 3.444256 | 3.237482  |
| ENSMUSG Midn      | 35.48409 | 27.87727 | 30.17028 | 23.91249 | 20.71193 | 22.796507 |
| ENSMUSG Tent2     | 10.19779 | 10.62532 | 9.706487 | 10.82398 | 9.915472 | 10.398662 |
| ENSMUSG Gm9774    | 0.433269 | 0.574946 | 0.351465 | 0.635809 | 0.894031 | 0.553353  |
| ENSMUSG Sdc1      | 72.70475 | 71.1723  | 63.12643 | 67.86469 | 68.6396  | 73.144807 |
| ENSMUSG Lpin1     | 10.34428 | 11.52387 | 9.553895 | 8.779418 | 9.204123 | 10.511591 |
| ENSMUSG Snx13     | 24.46423 | 24.99287 | 22.20094 | 19.94265 | 20.39236 | 18.444136 |
| ENSMUSG Ntsr2     | 0        | 0        | 0        | 0        | 0        | 0         |
| ENSMUSG Abca8b    | 4.367988 | 4.268687 | 4.370902 | 2.118072 | 2.526093 | 2.123664  |
| ENSMUSG Rdh14     | 10.20299 | 10.34435 | 9.972369 | 11.10164 | 9.732347 | 10.836623 |
| ENSMUSG Nt5c1b    | 0.033411 | 0        | 0.036272 | 0        | 0        | 0         |
| ENSMUSG Map2k6    | 2.458138 | 2.933607 | 2.063504 | 2.7778   | 3.257366 | 2.635475  |
| ENSMUSG Efna3     | 0.510462 | 0.553241 | 0.315066 | 0.455108 | 0.340518 | 0.609866  |
| ENSMUSG Klhl29    | 2.844026 | 2.695196 | 3.208323 | 1.26685  | 1.493937 | 1.484948  |
| ENSMUSG Dnajb4    | 30.41091 | 32.81115 | 33.17493 | 19.198   | 20.08655 | 19.927124 |
| ENSMUSG Adi1      | 27.75456 | 29.05367 | 24.95919 | 27.34118 | 24.27515 | 27.725773 |
| ENSMUSG Ifi44     | 4.448333 | 2.910798 | 10.63157 | 5.290091 | 3.613395 | 3.044263  |
| ENSMUSG Ptgfr     | 2.304338 | 2.343637 | 2.032638 | 1.174607 | 1.071834 | 0.82459   |
| ENSMUSG Dkk2      | 0.145705 | 0.235275 | 0.153844 | 0.272085 | 0.371974 | 0.33412   |
| ENSMUSG Tbck      | 3.177883 | 3.005735 | 2.341171 | 2.637451 | 2.500868 | 3.098084  |
| ENSMUSG Kcnq5     | 1.830404 | 2.00198  | 2.073898 | 2.141737 | 1.747953 | 1.54609   |
| ENSMUSG Papss1    | 24.80922 | 25.93029 | 24.27861 | 23.48773 | 21.95216 | 23.72619  |
| ENSMUSG Pea15a    | 118.1794 | 117.4359 | 123.8126 | 91.75831 | 96.86088 | 92.858741 |
| ENSMUSG Mroh9     | 0        | 0        | 0        | 0        | 0        | 0         |
| ENSMUSG Vmn1r4    | 0.019939 | 0        | 0        | 0        | 0        | 0         |
| ENSMUSG Gmeb2     | 7.098831 | 6.478566 | 6.435114 | 5.645503 | 6.020065 | 5.839655  |
| ENSMUSG Trpm5     | 0.112564 | 0.199588 | 0.13131  | 0.318259 | 0.377001 | 0.381248  |
| Mus_musc Mus_musc | 0        | 0        | 0        | 0        | 0        | 0         |
| ENSMUSG Rpain     | 9.965695 | 10.58111 | 11.30717 | 9.450225 | 9.861219 | 8.499535  |
| ENSMUSG Derl2     | 14.25802 | 14.92641 | 14.32339 | 15.12976 | 15.62637 | 15.558729 |
| ENSMUSG C1qbp     | 19.32251 | 16.73284 | 16.86788 | 18.15825 | 17.54336 | 19.231474 |
| ENSMUSG Tipin     | 9.96415  | 7.995456 | 9.429257 | 8.073554 | 8.112688 | 9.460983  |
| ENSMUSG Dis3l     | 7.098413 | 7.827504 | 6.695888 | 7.10591  | 7.743898 | 7.202791  |
| ENSMUSG Igdcc3    | 0.035444 | 0        | 0.057321 | 0.104202 | 0.052025 | 0         |
| ENSMUSG Dpp8      | 38.61256 | 40.56862 | 31.05627 | 33.15593 | 32.10253 | 31.442337 |
| ENSMUSG Parp16    | 2.615275 | 2.789602 | 2.8637   | 2.84802  | 3.459893 | 3.405058  |
| ENSMUSG Zdhhc19   | 0        | 0        | 0        | 0        | 0        | 0         |
| ENSMUSG Tmem106c  | 10.2865  | 12.20647 | 10.89434 | 12.13771 | 9.470421 | 10.702578 |
| ENSMUSG Rpl4      | 466.4614 | 470.2837 | 449.0844 | 516.4346 | 497.8875 | 522.55335 |
| ENSMUSG Snapc5    | 14.85578 | 14.13073 | 15.09568 | 14.11231 | 11.91631 | 13.442448 |
| ENSMUSG Tmem156   | 1.548508 | 1.673471 | 2.023397 | 1.472067 | 1.065575 | 1.695694  |
| ENSMUSG Ndufv1    | 33.78555 | 35.29375 | 37.75318 | 31.28664 | 31.44596 | 31.944349 |
| ENSMUSG 1500009C  | 0        | 0        | 0        | 0        | 0        | 0         |

|                   |          |          |          |          |          |           |
|-------------------|----------|----------|----------|----------|----------|-----------|
| ENSMUSG Rnf24     | 2.093603 | 2.678406 | 2.58381  | 2.393122 | 2.632001 | 2.176029  |
| ENSMUSG Efna5     | 0.826088 | 1.198184 | 0.559056 | 0.395295 | 0.552067 | 0.444402  |
| ENSMUSG Olfr223   | 0        | 0        | 0        | 0        | 0        | 0         |
| ENSMUSG Npw       | 9.724749 | 9.26347  | 8.049138 | 5.144447 | 5.994825 | 5.165355  |
| ENSMUSG Vrtn      | 0        | 0        | 0        | 0        | 0        | 0         |
| ENSMUSG Syndig1l  | 0        | 0        | 0        | 0        | 0        | 0         |
| ENSMUSG Kik6      | 0        | 0        | 0        | 0        | 0        | 0         |
| ENSMUSG Brd2      | 77.04985 | 76.88146 | 80.99466 | 68.29585 | 67.86393 | 66.85045  |
| ENSMUSG Zfp697    | 4.336953 | 5.105692 | 5.551381 | 2.815754 | 2.744984 | 2.579891  |
| ENSMUSG Slc35d2   | 2.754617 | 3.026792 | 2.754523 | 3.41652  | 2.598227 | 2.852309  |
| ENSMUSG Gm3286    | 0        | 0        | 0        | 0        | 0        | 0         |
| ENSMUSG 3830406C: | 9.856672 | 9.577176 | 9.645602 | 8.908753 | 8.024067 | 9.496284  |
| ENSMUSG Prlr      | 0.181428 | 0.271182 | 0.130194 | 0.719514 | 0.697432 | 0.474941  |
| ENSMUSG Ufd1      | 22.70531 | 24.77044 | 25.1483  | 21.80545 | 20.8315  | 19.551503 |
| ENSMUSG Pdgfrb    | 26.2614  | 20.13868 | 25.5424  | 15.45401 | 15.81883 | 14.020637 |
| ENSMUSG Csf1r     | 26.85517 | 24.5321  | 29.89897 | 41.05248 | 41.3718  | 42.987378 |
| ENSMUSG Zfp287    | 2.847587 | 3.251384 | 3.718211 | 2.947658 | 2.122369 | 2.937642  |
| ENSMUSG Uhmk1     | 27.07057 | 26.93138 | 24.30999 | 22.15366 | 22.72981 | 22.176901 |
| ENSMUSG Phyh      | 32.44732 | 35.24159 | 28.50163 | 35.89779 | 33.05019 | 33.073086 |
| ENSMUSG Sephs1    | 9.27491  | 8.302515 | 8.843698 | 7.745846 | 8.456656 | 8.487202  |
| ENSMUSG Atf6      | 14.4322  | 15.50148 | 14.11309 | 15.12925 | 16.21816 | 14.52072  |
| ENSMUSG Ucma      | 0        | 0        | 0        | 0.092453 | 0.133733 | 0         |
| ENSMUSG Mcm10     | 0.182391 | 0.263217 | 0.241273 | 0.605804 | 0.399008 | 0.999565  |
| ENSMUSG Rad51ap2  | 0        | 0.014532 | 0.059114 | 0.016442 | 0.01764  | 0         |
| ENSMUSG Fam162a   | 24.26826 | 25.17165 | 26.46149 | 21.82969 | 24.51092 | 25.383597 |
| ENSMUSG Notum     | 2.80243  | 2.993634 | 2.752066 | 1.931904 | 2.16717  | 2.316025  |
| ENSMUSG Upk3b     | 30.74963 | 32.52944 | 23.66714 | 14.84059 | 7.9761   | 19.024889 |
| ENSMUSG Bsdcl     | 26.44529 | 26.48234 | 27.6143  | 21.89187 | 22.90949 | 22.184132 |
| ENSMUSG Rnf6      | 22.20752 | 21.11283 | 20.23545 | 18.32446 | 17.95244 | 19.114109 |
| ENSMUSG Rpl7l1    | 25.2715  | 26.57552 | 25.8142  | 23.65772 | 24.11795 | 25.329407 |
| ENSMUSG Psme4     | 12.6292  | 13.30354 | 11.88043 | 15.22947 | 15.21718 | 14.72677  |
| ENSMUSG Plekhh2   | 5.216875 | 5.807439 | 4.901677 | 4.686991 | 4.464123 | 3.956124  |
| ENSMUSG Repts2    | 14.89957 | 15.22302 | 12.16474 | 9.962044 | 9.552957 | 8.871715  |
| ENSMUSG Erf       | 14.77193 | 13.72015 | 14.33452 | 9.178608 | 9.519422 | 9.559468  |
| ENSMUSG Dlk1      | 0        | 0.047983 | 0        | 0.020979 | 0.029571 | 0         |
| ENSMUSG Cyp3a25   | 0        | 0        | 0        | 0        | 0        | 0         |
| ENSMUSG Arsa      | 9.389738 | 8.77094  | 9.79716  | 9.906681 | 9.957103 | 9.089246  |
| Mus_musc Mus_musc | 0.617818 | 1.036628 | 0.635924 | 0.914828 | 0.533407 | 1.082094  |
| Mus_musc Mus_musc | 0.066769 | 0.226961 | 0.163422 | 0.091741 | 0.311523 | 0.034979  |
| Mus_musc Mus_musc | 0.082726 | 0.290245 | 0.402822 | 0.260761 | 0.189706 | 0.325625  |
| ENSMUSG Rev1      | 6.793577 | 6.677486 | 6.253117 | 4.460424 | 4.93893  | 4.620602  |
| ENSMUSG Eif5b     | 15.75503 | 15.93273 | 16.11194 | 15.09304 | 15.44845 | 14.991008 |
| ENSMUSG Chst10    | 0.532954 | 0.394838 | 0.424673 | 1.000636 | 0.842281 | 1.238331  |
| ENSMUSG Mrpl30    | 28.55291 | 27.76599 | 28.23277 | 27.00996 | 26.39662 | 27.609899 |
| ENSMUSG Lyg1      | 0        | 0        | 0        | 0        | 0        | 0         |
| ENSMUSG Mitd1     | 8.414445 | 7.644326 | 9.530895 | 7.987497 | 7.387694 | 7.798778  |
| ENSMUSG Cd33      | 4.211222 | 4.608682 | 4.453375 | 6.378295 | 7.032076 | 5.699095  |
| Mus_musc Mus_musc | 6.928676 | 5.209203 | 7.700818 | 11.3538  | 11.09008 | 11.612357 |
| Mus_musc Mus_musc | 0.221539 | 0.142683 | 0        | 0.115614 | 0.344614 | 0.108493  |
| Mus_musc Mus_musc | 0        | 0.171455 | 0        | 0.176451 | 0.187307 | 0.223752  |
| Mus_musc Mus_musc | 0.213387 | 0.126493 | 0.344925 | 0.118212 | 0.315345 | 0.258804  |
| Mus_musc Mus_musc | 0.105037 | 0.069728 | 0.04799  | 0.331876 | 0.169995 | 0.247727  |
| Mus_musc Mus_musc | 0        | 0.146113 | 0.019508 | 0.414343 | 0.053895 | 0.32541   |
| ENSMUSG Hoxd3     | 0        | 0.031455 | 0.072344 | 0        | 0        | 0.034628  |
| ENSMUSG Gm17654   | 0        | 0        | 0        | 0        | 0        | 0         |
| ENSMUSG Rhox2f    | 0        | 0        | 0        | 0        | 0        | 0         |
| ENSMUSG Gm4133    | 0        | 0        | 0        | 0        | 0        | 0         |
| ENSMUSG Cd79a     | 13.67642 | 8.114264 | 9.328192 | 48.82962 | 38.9538  | 39.746555 |
| ENSMUSG Grik5     | 3.414669 | 3.078664 | 3.193944 | 3.299114 | 2.923565 | 3.341222  |
| Mus_musc Mus_musc | 0        | 0        | 0        | 0.159488 | 0.072505 | 0.206302  |
| Mus_musc Mus_musc | 0        | 0        | 0.272513 | 0        | 0.367264 | 0         |
| Mus_musc Mus_musc | 0        | 0        | 0        | 0        | 0        | 0.184186  |
| Mus_musc Mus_musc | 0.0406   | 0.249049 | 0.335109 | 0.316721 | 0.246955 | 0.248862  |
| Mus_musc Mus_musc | 7.013674 | 6.107554 | 8.754788 | 5.849942 | 5.132249 | 5.161648  |

|                   |          |          |          |          |          |           |
|-------------------|----------|----------|----------|----------|----------|-----------|
| Mus_musc Mus_musc | 0.230653 | 0.15933  | 0.148012 | 0.394778 | 0.189037 | 0.334943  |
| Mus_musc Mus_musc | 0.21867  | 0.094721 | 0.314388 | 0.056711 | 0.127378 | 0.164589  |
| ENSMUSG Stx19     | 1.912411 | 1.865649 | 1.678007 | 2.225513 | 1.842624 | 1.745839  |
| Mus_musc Mus_musc | 0        | 0        | 0        | 0        | 0        | 0         |
| Mus_musc Mus_musc | 0        | 0.091527 | 0.069562 | 0        | 0        | 0.127305  |
| Mus_musc Mus_musc | 0        | 0        | 0        | 0        | 0.261846 | 0         |
| Mus_musc Mus_musc | 0.445727 | 0.545099 | 0.381981 | 0.318581 | 0.346627 | 0.661866  |
| ENSMUSG Gm884     | 0        | 0        | 0        | 0        | 0        | 0         |
| Mus_musc Mus_musc | 0.205485 | 0        | 0.112131 | 0.185292 | 0        | 0.102903  |
| Mus_musc Mus_musc | 2.289784 | 2.189496 | 3.476753 | 1.835106 | 1.160346 | 1.401029  |
| Mus_musc Mus_musc | 13.45745 | 14.40951 | 19.86872 | 13.44076 | 9.81604  | 10.720827 |
| ENSMUSG Usp54     | 11.92841 | 12.69895 | 10.73335 | 7.925705 | 8.488208 | 7.615009  |
| Mus_musc Mus_musc | 0.157495 | 0.444451 | 0.291281 | 0.298023 | 0.245016 | 0.152731  |
| Mus_musc Mus_musc | 0.5077   | 0.490775 | 0.246783 | 0.802677 | 0.108697 | 0.065885  |
| ENSMUSG Zfp84     | 4.969553 | 4.402597 | 4.446778 | 3.843163 | 4.08061  | 4.078586  |
| ENSMUSG Gm1527    | 0        | 0        | 0        | 0        | 0        | 0         |
| ENSMUSG Eif2s2    | 19.14674 | 20.71667 | 20.72504 | 23.4796  | 20.32884 | 21.41625  |
| ENSMUSG Kif5a     | 0.143749 | 0.266155 | 0.143042 | 0.330058 | 0.420626 | 0.27542   |
| ENSMUSG 4930550L2 | 0        | 0        | 0        | 0        | 0        | 0         |
| ENSMUSG Myh7b     | 0.096045 | 0.015199 | 0.082591 | 0.027417 | 0.059646 | 0.067721  |
| ENSMUSG Lrrc31    | 0.343342 | 0.457401 | 0.207282 | 0.405306 | 0.40776  | 0.417032  |
| Mus_musc Mus_musc | 5.237233 | 5.459655 | 5.341039 | 4.505477 | 4.465112 | 4.105602  |
| ENSMUSG Spatc1l   | 0        | 0.053522 | 0.057073 | 0.151284 | 0.155857 | 0.082967  |
| Mus_musc Mus_musc | 0        | 0        | 0        | 0        | 0        | 0.202676  |
| Mus_musc Mus_musc | 0.04045  | 0.332502 | 0.222281 | 0.195127 | 0.085493 | 0.2131    |
| Mus_musc Mus_musc | 0        | 0.030324 | 0.048068 | 0        | 0.017901 | 0         |
| Mus_musc Mus_musc | 0.02444  | 0.025268 | 0        | 0        | 0.150321 | 0.032457  |
| Mus_musc Mus_musc | 2.788017 | 2.586583 | 3.581215 | 3.402612 | 3.259701 | 3.05951   |
| Mus_musc Mus_musc | 1.371665 | 0.270078 | 0.631432 | 0.326249 | 0.210685 | 0.40056   |
| Mus_musc Mus_musc | 3.011977 | 9.422455 | 7.916919 | 6.49014  | 2.746238 | 9.023373  |
| ENSMUSG Tmem104   | 4.751665 | 4.150314 | 4.488468 | 5.88969  | 6.067032 | 6.800287  |
| ENSMUSG Eif4g1    | 73.96668 | 70.8927  | 73.86825 | 68.13417 | 72.35481 | 70.852071 |
| ENSMUSG Tmub1     | 6.056515 | 7.639274 | 7.792158 | 7.129864 | 6.667995 | 6.778683  |
| ENSMUSG Fastk     | 17.35642 | 15.53535 | 15.19415 | 16.83439 | 16.86374 | 15.042113 |
| ENSMUSG 4930451l1 | 0        | 0        | 0        | 0        | 0        | 0         |
| ENSMUSG Nub1      | 32.02857 | 31.90106 | 32.5071  | 27.31528 | 27.1647  | 25.930275 |
| ENSMUSG Vamp3     | 68.69106 | 62.70696 | 66.32768 | 50.39594 | 49.62151 | 50.384319 |
| ENSMUSG Zbtb48    | 6.139527 | 4.882144 | 6.318715 | 5.435326 | 4.835082 | 5.905945  |
| ENSMUSG Abcf2     | 23.86441 | 24.10483 | 25.27246 | 21.15627 | 21.55512 | 20.876425 |
| ENSMUSG Tas1r1    | 0.035991 | 0.121593 | 0.113588 | 0.301413 | 0.194126 | 0.312531  |
| Mus_musc Mus_musc | 0.794914 | 0.606928 | 0.340341 | 0.170747 | 0        | 0.198798  |
| ENSMUSG Tex52     | 0.050243 | 0        | 0.036294 | 0.302956 | 0.161474 | 0.09718   |
| ENSMUSG Adam24    | 0        | 0        | 0        | 0        | 0        | 0         |
| ENSMUSG Cdc42se1  | 44.96162 | 44.95251 | 45.85098 | 44.37975 | 43.63292 | 44.532744 |
| ENSMUSG Cystm1    | 85.01235 | 84.00102 | 83.50621 | 62.03499 | 69.42867 | 74.926185 |
| Mus_musc Mus_musc | 0.171658 | 0.375972 | 0.127944 | 0.280857 | 0.153232 | 0.582952  |
| Mus_musc Mus_musc | 0.618816 | 0.560499 | 0.411618 | 0.168629 | 0.161839 | 0.135431  |
| Mus_musc Mus_musc | 0.337806 | 0.158199 | 0.090082 | 0.198314 | 0.145456 | 0.224897  |
| ENSMUSG Dennd4b   | 5.557112 | 4.699761 | 5.415029 | 6.12776  | 6.206195 | 6.814885  |
| ENSMUSG Atf4      | 77.82888 | 76.74708 | 91.0464  | 69.38236 | 71.83921 | 79.722855 |
| ENSMUSG Crtac1    | 0.014663 | 0        | 0.01376  | 0.01357  | 0        | 0.030698  |
| ENSMUSG Zmym6     | 4.650675 | 4.381107 | 4.313323 | 3.812792 | 3.167278 | 3.371714  |
| ENSMUSG Grin2d    | 1.214456 | 0.957347 | 1.459757 | 0.882128 | 1.122698 | 1.376985  |
| ENSMUSG Ada       | 1.537001 | 1.682273 | 3.156444 | 7.167665 | 5.078352 | 6.212958  |
| ENSMUSG Rhbdl3    | 1.140419 | 1.835107 | 1.503401 | 2.098674 | 2.044946 | 2.042022  |
| ENSMUSG Kdelr1    | 56.10778 | 56.40735 | 56.99192 | 61.59301 | 62.31633 | 59.098395 |
| ENSMUSG Spg7      | 16.35763 | 14.32207 | 14.61108 | 12.91079 | 12.80671 | 13.209223 |
| ENSMUSG Sult5a1   | 2.544503 | 1.786528 | 1.699188 | 2.267082 | 2.303147 | 2.403193  |
| ENSMUSG Impa2     | 1.854617 | 2.377626 | 1.985025 | 3.431188 | 4.078795 | 4.873672  |
| ENSMUSG Dnmt3l    | 0.534166 | 0.11912  | 0.218356 | 0.069435 | 0.137746 | 0.077233  |
| ENSMUSG Aire      | 0        | 0.089815 | 0        | 0.02781  | 0.042079 | 0.019623  |
| ENSMUSG Icosl     | 7.634918 | 7.436386 | 8.047543 | 6.571575 | 6.75536  | 6.566303  |
| ENSMUSG D1Ertd622 | 5.668914 | 5.6422   | 5.03513  | 5.761713 | 8.408922 | 4.780966  |
| ENSMUSG Trmt10c   | 4.17778  | 4.591086 | 4.562233 | 4.984965 | 4.103749 | 4.244075  |

|                   |          |          |          |          |          |           |
|-------------------|----------|----------|----------|----------|----------|-----------|
| ENSMUSG Bms1      | 14.0448  | 13.76861 | 14.38043 | 12.01675 | 11.1288  | 12.518094 |
| ENSMUSG Ebf3      | 0.033322 | 0.072798 | 0.030141 | 0        | 0        | 0         |
| ENSMUSG Rasgef1a  | 38.61388 | 41.27521 | 43.34501 | 25.08977 | 23.2204  | 20.925639 |
| ENSMUSG Aamp      | 58.59701 | 61.82147 | 66.24785 | 58.91953 | 58.6512  | 61.522721 |
| ENSMUSG 4930433I1 | 0        | 0        | 0        | 0        | 0        | 0         |
| ENSMUSG 4933430I1 | 0.053678 | 0.102555 | 0.084894 | 0.398783 | 0.621645 | 0.396987  |
| ENSMUSG Gpr107    | 12.34524 | 11.68723 | 12.09126 | 12.39176 | 12.29687 | 12.928635 |
| ENSMUSG Nalcn     | 0.139796 | 0.040646 | 0.069169 | 0.12879  | 0        | 0.055499  |
| ENSMUSG Nrxn3     | 0.007121 | 0.022011 | 0.017359 | 0.057947 | 0.025829 | 0         |
| ENSMUSG Zfp101    | 3.012134 | 3.430434 | 2.78471  | 2.491596 | 2.720059 | 3.059268  |
| Mus_musc Mus_musc | 0.193874 | 0.212085 | 0.151536 | 0.420299 | 0.220845 | 0.210767  |
| ENSMUSG Cep162    | 2.36544  | 2.65678  | 2.314041 | 3.117946 | 2.963185 | 2.674643  |
| ENSMUSG Sipa1     | 39.71143 | 32.70065 | 42.63054 | 35.90637 | 33.6349  | 37.249477 |
| ENSMUSG 1700017N  | 0        | 0        | 0        | 0        | 0        | 0         |
| ENSMUSG Vmn2r107  | 0        | 0        | 0        | 0        | 0        | 0         |
| ENSMUSG Olfr974   | 0        | 0        | 0        | 0        | 0        | 0         |
| ENSMUSG Foxd4     | 0        | 0.013161 | 0        | 0        | 0        | 0         |
| ENSMUSG Kcnj16    | 0.053346 | 0        | 0        | 0        | 0        | 0         |
| ENSMUSG Irf2bp2   | 17.64864 | 16.34162 | 16.8425  | 12.26516 | 14.01302 | 13.372147 |
| ENSMUSG Zfp786    | 0.066704 | 0.136465 | 0.0612   | 0.088126 | 0.103906 | 0.257664  |
| ENSMUSG Gucy2c    | 0        | 0        | 0        | 0.031559 | 0        | 0         |
| ENSMUSG Rpl37     | 111.2764 | 128.5682 | 134.5771 | 144.4292 | 124.5966 | 136.75794 |
| ENSMUSG Olfr1062  | 0        | 0        | 0        | 0        | 0        | 0         |
| ENSMUSG Fhdc1     | 11.57389 | 13.84328 | 7.678196 | 9.733366 | 10.94421 | 11.112038 |
| ENSMUSG Rhod      | 5.073272 | 4.68628  | 5.855291 | 5.199831 | 5.421463 | 5.259328  |
| ENSMUSG Tcf711    | 7.97449  | 9.159684 | 7.098984 | 7.284762 | 8.348102 | 7.2277    |
| ENSMUSG Ppp4r3a   | 14.13345 | 14.85864 | 12.7561  | 13.71531 | 13.94171 | 13.718067 |
| ENSMUSG Card6     | 3.890412 | 3.641825 | 3.319875 | 3.205318 | 3.562664 | 3.318347  |
| ENSMUSG Palm2     | 0.211644 | 0.4998   | 0.471308 | 0.37766  | 0.578182 | 0.362441  |
| ENSMUSG Adra1b    | 0.471467 | 0.654865 | 0.570458 | 0.496691 | 0.345506 | 0.438916  |
| ENSMUSG Pla2g6    | 5.774072 | 6.66167  | 6.653227 | 6.992518 | 7.235504 | 7.712095  |
| Mus_musc Mus_musc | 0        | 0.101677 | 0.128339 | 0.0777   | 0.05239  | 0.15306   |
| ENSMUSG Xkr7      | 0        | 0        | 0        | 0        | 0        | 0         |
| Mus_musc Mus_musc | 0        | 0.154309 | 0        | 0        | 0.030925 | 0         |
| Mus_musc Mus_musc | 0.18636  | 0        | 0        | 0.183555 | 0.049785 | 0         |
| Mus_musc Mus_musc | 0        | 0        | 0        | 0.142239 | 0.324682 | 0         |
| ENSMUSG Olfr68    | 0        | 0        | 0        | 0        | 0        | 0         |
| ENSMUSG Gm2001    | 0.055575 | 0.023008 | 0        | 0        | 0        | 0         |
| Mus_musc Mus_musc | 0.231589 | 0.289082 | 0.133745 | 0.295158 | 0.049781 | 0.256095  |
| Mus_musc Mus_musc | 0.209229 | 0.538689 | 0.189145 | 0.367253 | 0.340275 | 0.192328  |
| Mus_musc Mus_musc | 0.711033 | 0.929142 | 0.316074 | 0.506022 | 0.417828 | 0.500469  |
| Mus_musc Mus_musc | 1.407045 | 0.974727 | 0.775002 | 0.555888 | 0.404281 | 0.175032  |
| Mus_musc Mus_musc | 0.539434 | 0.511314 | 0.580891 | 1.019849 | 0.998116 | 0.710325  |
| ENSMUSG Ppp1r3c   | 3.481244 | 5.613191 | 4.324616 | 6.75495  | 6.284577 | 7.871845  |
| ENSMUSG Capn6     | 0.385145 | 0.385492 | 0.301817 | 0.47323  | 0.374119 | 0.633195  |
| ENSMUSG Rplp0     | 230.1087 | 233.7997 | 234.8664 | 303.1622 | 293.2412 | 326.86995 |
| ENSMUSG Cyp20a1   | 16.29748 | 13.60687 | 15.4308  | 11.55231 | 11.97587 | 11.32385  |
| ENSMUSG Dennd1b   | 3.981779 | 3.272553 | 3.372863 | 4.533964 | 4.011429 | 4.508813  |
| ENSMUSG Cep70     | 5.823178 | 6.471374 | 4.484117 | 4.970732 | 3.771236 | 4.67562   |
| ENSMUSG Lrif1     | 6.168621 | 6.64375  | 6.788129 | 7.032597 | 7.549387 | 6.500715  |
| ENSMUSG Erfe      | 0.021496 | 0.036263 | 0.098574 | 0.093688 | 0.095329 | 0.228485  |
| ENSMUSG Antxrl    | 0        | 0.042213 | 0        | 0.102009 | 0.019264 | 0.023368  |
| ENSMUSG Arl4a     | 9.908478 | 12.5331  | 9.810629 | 5.928868 | 6.357949 | 7.10098   |
| ENSMUSG Olfr139   | 0        | 0        | 0        | 0        | 0        | 0         |
| ENSMUSG Cyp2j9    | 2.523701 | 2.84582  | 2.512521 | 1.743237 | 1.655119 | 1.83481   |
| ENSMUSG Map2      | 3.287952 | 2.667693 | 2.69974  | 2.433896 | 2.519301 | 2.436379  |
| ENSMUSG Kcnmb3    | 0        | 0        | 0.072795 | 0.06017  | 0.118111 | 0         |
| ENSMUSG Gm17304   | 0        | 0        | 0        | 0        | 0        | 0         |
| ENSMUSG Rpgrip1   | 0.088246 | 0.169997 | 0.128473 | 0.139536 | 0.274037 | 0.166938  |
| ENSMUSG Chd6      | 9.479595 | 9.773213 | 7.779441 | 7.793546 | 7.754499 | 6.963442  |
| ENSMUSG Txnl4a    | 11.58976 | 15.34186 | 13.87754 | 13.82612 | 12.8176  | 13.828454 |
| ENSMUSG Tmem140   | 25.08587 | 27.33209 | 36.21111 | 24.54982 | 21.10781 | 21.996064 |
| ENSMUSG Ado       | 6.123183 | 6.631237 | 5.725777 | 6.325066 | 6.386264 | 6.632611  |
| ENSMUSG Scimp     | 2.417248 | 2.477521 | 3.960301 | 3.964104 | 5.033347 | 5.055827  |

|                    |          |          |          |          |          |           |
|--------------------|----------|----------|----------|----------|----------|-----------|
| ENSMUSG Cox4i2     | 48.84673 | 51.30386 | 70.39561 | 29.19171 | 29.50556 | 26.438613 |
| ENSMUSG Slc22a30   | 0        | 0        | 0        | 0        | 0        | 0         |
| ENSMUSG D930048N   | 1.59325  | 1.886084 | 1.986028 | 1.846233 | 1.209978 | 1.147788  |
| ENSMUSG Cpne8      | 10.65405 | 10.22987 | 9.189269 | 6.882624 | 7.875021 | 7.059634  |
| ENSMUSG Hook2      | 5.124494 | 5.384072 | 4.462158 | 4.941406 | 4.915005 | 5.008555  |
| ENSMUSG Hist1h1d   | 0.062449 | 0.023068 | 0.013606 | 0.072138 | 0.094063 | 0.042865  |
| ENSMUSG Gm20537    | 0.082697 | 0.006258 | 0        | 0        | 0.055857 | 0         |
| ENSMUSG Gm20422    | 0        | 0        | 0        | 0        | 0.050753 | 0         |
| ENSMUSG Klhdc3     | 29.91559 | 29.81311 | 29.47448 | 29.34571 | 28.47767 | 29.747112 |
| ENSMUSG Cpe        | 14.57226 | 16.26024 | 9.099649 | 11.47528 | 9.249825 | 12.18496  |
| ENSMUSG Iars       | 12.45361 | 11.63596 | 12.35821 | 10.98027 | 11.69294 | 12.628734 |
| ENSMUSG Nufip2     | 13.43424 | 14.4757  | 13.32558 | 12.25168 | 12.61695 | 12.039346 |
| ENSMUSG Zfp365     | 2.732085 | 2.672459 | 3.049022 | 1.736852 | 1.394428 | 1.845279  |
| ENSMUSG Gm2075     | 0        | 0        | 0        | 0        | 0        | 0         |
| ENSMUSG Olfr161    | 0        | 0        | 0        | 0        | 0        | 0         |
| ENSMUSG Ankmy2     | 9.065702 | 8.328376 | 8.835581 | 7.818788 | 7.577345 | 8.481754  |
| ENSMUSG Fam69b     | 2.38821  | 1.810617 | 1.903954 | 2.847673 | 3.291747 | 3.212075  |
| ENSMUSG Rtp4       | 14.80478 | 11.09023 | 30.71334 | 16.20429 | 10.98672 | 9.947951  |
| ENSMUSG Pus7l      | 1.151825 | 1.306793 | 1.467603 | 1.068184 | 1.303823 | 1.150614  |
| ENSMUSG Sapcd1     | 0.347189 | 0.398059 | 0.671107 | 1.535081 | 0.420413 | 0.78614   |
| ENSMUSG Gm21698    | 0        | 0        | 0        | 0        | 0        | 0.018449  |
| ENSMUSG Gm16427    | 0        | 0        | 0        | 0        | 0        | 0         |
| ENSMUSG Gatad2a    | 28.82969 | 26.19493 | 27.14299 | 22.12256 | 22.32272 | 23.255609 |
| ENSMUSG Hist1h1c   | 34.33442 | 27.92355 | 23.70412 | 37.69168 | 35.11923 | 34.811554 |
| ENSMUSG Phf5a      | 14.74108 | 15.46294 | 12.34351 | 12.92397 | 15.89242 | 11.316323 |
| ENSMUSG Olfr168    | 0        | 0        | 0        | 0        | 0        | 0         |
| ENSMUSG Olfr771    | 0        | 0        | 0        | 0        | 0        | 0         |
| ENSMUSG ccdc198    | 0        | 0        | 0        | 0        | 0        | 0         |
| ENSMUSG Slc35f4    | 0        | 0        | 0        | 0        | 0        | 0         |
| ENSMUSG Ccdc32     | 8.524322 | 9.049478 | 8.632699 | 9.883453 | 7.890749 | 7.710622  |
| ENSMUSG Dtx4       | 4.635749 | 5.592836 | 4.312414 | 8.519804 | 8.131415 | 9.271837  |
| ENSMUSG Zc3h12d    | 1.013311 | 0.54555  | 0.844887 | 2.369886 | 2.000053 | 2.397572  |
| ENSMUSG Phtf2      | 2.194012 | 2.502686 | 2.253495 | 2.961802 | 2.845468 | 3.094995  |
| ENSMUSG Sinhcaf    | 9.401655 | 9.876641 | 9.364836 | 7.385089 | 10.27178 | 8.622526  |
| ENSMUSG Cbx4       | 9.113094 | 7.320603 | 8.180062 | 8.730848 | 7.820658 | 8.620034  |
| ENSMUSG Ankrd13c   | 15.91612 | 16.088   | 15.0412  | 13.78182 | 14.03031 | 14.19233  |
| ENSMUSG Nnt        | 0        | 0        | 0        | 0        | 0        | 0         |
| ENSMUSG Olfr114    | 0        | 0        | 0        | 0        | 0        | 0         |
| ENSMUSG Gch1       | 6.33998  | 5.217155 | 6.041492 | 5.525875 | 6.673966 | 6.972627  |
| ENSMUSG Nr0b2      | 0        | 0        | 0        | 0        | 0        | 0         |
| ENSMUSG Olfr911-ps | 0        | 0        | 0        | 0        | 0        | 0         |
| ENSMUSG Mysm1      | 5.637883 | 5.093831 | 4.298128 | 5.270614 | 4.643003 | 4.431628  |
| ENSMUSG Tex24      | 0        | 0        | 0        | 0        | 0        | 0         |
| ENSMUSG Gm13276    | 0        | 0        | 0        | 0.090019 | 0        | 0.050324  |
| ENSMUSG Gm21488    | 0        | 0        | 0        | 0        | 0        | 0         |
| ENSMUSG Gm20835    | 0        | 0        | 0        | 0        | 0        | 0         |
| ENSMUSG Lim2       | 0        | 0        | 0.04854  | 0        | 0        | 0         |
| ENSMUSG Cd302      | 22.26214 | 25.86819 | 24.8991  | 25.04732 | 29.75282 | 27.377328 |
| ENSMUSG Fpr-rs3    | 0        | 0        | 0        | 0        | 0        | 0         |
| ENSMUSG Gm28870    | 0        | 0        | 0        | 0        | 0        | 0         |
| ENSMUSG Bloc1s4    | 6.178893 | 5.606893 | 6.528527 | 6.357673 | 5.209054 | 6.408032  |
| ENSMUSG Tex13a     | 0        | 0        | 0        | 0        | 0        | 0         |
| ENSMUSG Hif1an     | 12.53109 | 14.14845 | 12.30929 | 11.76233 | 12.75281 | 12.257449 |
| ENSMUSG Arhgap26   | 6.979423 | 5.760259 | 5.638852 | 5.268404 | 5.212748 | 5.322062  |
| ENSMUSG Gm21293    | 0        | 0        | 0        | 0        | 0        | 0         |
| ENSMUSG Wtip       | 11.7052  | 13.07111 | 13.79609 | 10.19331 | 10.57267 | 10.479887 |
| ENSMUSG Vmn2r103   | 0        | 0        | 0        | 0        | 0        | 0         |
| ENSMUSG Olfr1404   | 0        | 0        | 0        | 0        | 0        | 0         |
| ENSMUSG Abcb5      | 0        | 0        | 0        | 0        | 0        | 0         |
| ENSMUSG Tap1       | 17.54683 | 12.80424 | 68.50539 | 43.30217 | 19.81423 | 24.093151 |
| ENSMUSG Mfap5      | 6.813271 | 6.972776 | 5.744157 | 8.506015 | 6.220185 | 9.137204  |
| ENSMUSG Klrg1      | 1.927787 | 1.100681 | 6.346337 | 1.835794 | 1.063513 | 1.530413  |
| ENSMUSG Bbs7       | 3.307925 | 3.991608 | 3.475779 | 3.459809 | 3.568857 | 2.857855  |
| ENSMUSG Gm26558    | 0.092532 | 0.054043 | 0.095959 | 0.078761 | 0.162718 | 0.12645   |

|                    |          |          |          |          |          |           |
|--------------------|----------|----------|----------|----------|----------|-----------|
| ENSMUSG A2m        | 0        | 0.019871 | 0        | 0.080246 | 0.10634  | 0.080741  |
| ENSMUSG Capn15     | 7.558117 | 8.359936 | 9.133457 | 8.980261 | 8.809996 | 9.781487  |
| ENSMUSG Rabep1     | 13.09876 | 13.55332 | 12.36051 | 10.85338 | 10.70389 | 11.108932 |
| ENSMUSG Mxra7      | 21.65581 | 23.49639 | 24.00457 | 14.94676 | 16.17033 | 13.900697 |
| ENSMUSG 1810032O   | 1.8976   | 2.18858  | 3.162861 | 2.357705 | 1.642173 | 2.757641  |
| ENSMUSG Ptpn22     | 2.151807 | 2.355087 | 3.208952 | 6.037778 | 4.994483 | 5.448326  |
| ENSMUSG Cygb       | 10.11426 | 11.4547  | 7.499359 | 9.517493 | 8.370284 | 10.094404 |
| ENSMUSG Syt6       | 0.261001 | 0.101091 | 0.254896 | 0.058754 | 0.109109 | 0.160245  |
| ENSMUSG Olfml3     | 12.43963 | 10.35696 | 13.4611  | 12.18113 | 11.77382 | 12.600092 |
| ENSMUSG Mfsd11     | 7.504537 | 7.093471 | 7.236063 | 8.741922 | 10.2083  | 9.791533  |
| ENSMUSG Pbx4       | 0.483937 | 0.305354 | 0.23467  | 0.405034 | 0.553428 | 0.607688  |
| ENSMUSG Lpar2      | 0.991161 | 1.079515 | 0.990326 | 0.98598  | 0.77598  | 0.705891  |
| ENSMUSG Atp13a1    | 12.62968 | 10.77435 | 13.25683 | 11.81736 | 12.81041 | 13.510239 |
| ENSMUSG Ints10     | 8.332075 | 8.693343 | 6.361533 | 6.120764 | 7.40258  | 6.530645  |
| ENSMUSG Dctn1      | 48.87411 | 48.2572  | 45.40433 | 36.22251 | 36.5763  | 36.334992 |
| ENSMUSG Olfr477    | 0        | 0        | 0        | 0        | 0        | 0         |
| ENSMUSG 2610318N   | 0.315316 | 0.340834 | 0        | 0.719461 | 0.971622 | 0.60388   |
| ENSMUSG Lrrc40     | 4.873624 | 4.058633 | 3.414227 | 3.619787 | 3.564908 | 3.441917  |
| ENSMUSG Pacsin3    | 10.73014 | 10.70854 | 10.30349 | 8.896553 | 9.39443  | 8.558314  |
| ENSMUSG A730015C   | 0.514921 | 0.208769 | 0.344745 | 0.239363 | 0.41748  | 0.375259  |
| ENSMUSG Prlh       | 0.091972 | 0.272278 | 0        | 0        | 0        | 0.131466  |
| ENSMUSG Snrpe      | 19.73683 | 19.78371 | 16.45135 | 27.93042 | 15.43581 | 12.482585 |
| ENSMUSG Tbx22      | 0        | 0        | 0        | 0        | 0        | 0         |
| ENSMUSG 2610002M   | 5.404826 | 6.019989 | 4.98914  | 5.0142   | 5.367868 | 4.883679  |
| ENSMUSG Olfr753-ps | 0        | 0        | 0.317581 | 0.16486  | 0.017353 | 0         |
| ENSMUSG Gm30083    | 0        | 0        | 0        | 0        | 0        | 0         |
| ENSMUSG Olfr157    | 0        | 0        | 0        | 0.046509 | 0.026463 | 0.020025  |
| ENSMUSG Lrrn4      | 7.508554 | 7.680822 | 4.850492 | 5.046984 | 2.725206 | 7.263532  |
| ENSMUSG Ubn1       | 17.8191  | 17.97188 | 16.77806 | 15.95793 | 17.01843 | 15.93938  |
| ENSMUSG Zdhhc2     | 1.45651  | 2.336911 | 1.586581 | 1.989116 | 2.167807 | 2.295791  |
| ENSMUSG Olfr448    | 0        | 0        | 0        | 0        | 0        | 0         |
| ENSMUSG Prrx2      | 0.390025 | 0.070355 | 0.059673 | 0.254926 | 0.300444 | 0.21269   |
| ENSMUSG Wfs1       | 6.908181 | 7.046233 | 7.523012 | 8.63071  | 9.868281 | 9.62102   |
| ENSMUSG Zfp882     | 1.238288 | 1.555856 | 1.755893 | 1.507249 | 1.493383 | 1.66524   |
| ENSMUSG Olfr91     | 0        | 0        | 0        | 0.03986  | 0        | 0         |
| ENSMUSG Gm13769    | 0        | 0        | 0        | 0        | 0        | 0         |
| ENSMUSG Gm11939    | 0        | 0        | 0        | 0        | 0        | 0         |
| ENSMUSG Olfr707    | 0        | 0        | 0        | 0        | 0        | 0         |
| ENSMUSG Gm12355    | 0.490063 | 0.275292 | 0.180259 | 0.437635 | 0.177863 | 0.091461  |
| ENSMUSG Cd300e     | 1.776033 | 1.091029 | 2.968438 | 1.281286 | 0.564103 | 0.348084  |
| ENSMUSG Nagk       | 19.75896 | 17.3678  | 20.16631 | 21.05268 | 23.49054 | 22.35502  |
| ENSMUSG Vipas39    | 13.59681 | 13.24389 | 13.0431  | 13.87306 | 14.09769 | 14.29397  |
| ENSMUSG Snw1       | 36.27543 | 37.02667 | 35.58548 | 29.95268 | 29.7282  | 28.001642 |
| ENSMUSG Sptlc2     | 30.11714 | 30.56952 | 30.02997 | 24.60498 | 23.45568 | 25.27207  |
| ENSMUSG Nrip1      | 5.866912 | 5.981387 | 5.442378 | 5.108841 | 5.662853 | 5.307061  |
| Mus_musc Mus_musc  | 0.459062 | 0.483138 | 0.346179 | 0.534775 | 0.649305 | 0.442077  |
| ENSMUSG Ngb        | 2.050203 | 2.605018 | 1.76388  | 0.619286 | 0.613406 | 0.65434   |
| ENSMUSG Gstz1      | 20.54007 | 27.13676 | 20.41028 | 19.80342 | 18.08252 | 18.057051 |
| ENSMUSG Mmgt2      | 7.208674 | 5.991149 | 9.548142 | 9.838295 | 9.993403 | 10.051989 |
| ENSMUSG 2210016L2  | 9.915373 | 8.107853 | 9.602869 | 7.824022 | 7.602453 | 7.370566  |
| ENSMUSG Ccdc88a    | 4.354159 | 4.837237 | 3.635924 | 5.970157 | 5.742044 | 5.511468  |
| ENSMUSG Mad1l1     | 5.749251 | 5.385598 | 6.085519 | 5.932984 | 5.677922 | 5.628599  |
| ENSMUSG Mrm2       | 4.423907 | 4.214578 | 4.683383 | 4.665306 | 4.025787 | 4.385925  |
| ENSMUSG D430042C   | 7.449836 | 7.157578 | 6.566533 | 7.169508 | 6.23161  | 6.876526  |
| ENSMUSG Psmg3      | 9.798923 | 10.22448 | 11.02927 | 9.792171 | 9.763248 | 10.056357 |
| ENSMUSG Gpbp1      | 29.05581 | 29.87875 | 28.41248 | 27.23685 | 25.38567 | 25.22373  |
| ENSMUSG Tfec       | 3.03838  | 3.722257 | 4.802801 | 9.249034 | 10.8593  | 10.717917 |
| ENSMUSG Tes        | 14.84508 | 13.55882 | 12.8587  | 15.64979 | 17.4588  | 18.925114 |
| ENSMUSG Golt1a     | 0.201486 | 0.373076 | 0.377457 | 0.514053 | 0.264078 | 0.418483  |
| ENSMUSG Flad1      | 6.110951 | 6.003398 | 6.567224 | 7.183649 | 5.901208 | 7.21033   |
| ENSMUSG Rgs1       | 0.085445 | 0.087777 | 0.053714 | 0.02131  | 0.053443 | 0.028371  |
| ENSMUSG Acp4       | 0        | 0.012974 | 0        | 0        | 0.037323 | 0         |
| ENSMUSG Acad12     | 4.240215 | 4.363752 | 4.333492 | 3.781439 | 3.808507 | 3.712882  |
| ENSMUSG Itpr3      | 11.85072 | 10.39685 | 11.02124 | 11.47259 | 10.62428 | 12.155941 |



|                   |          |          |          |          |          |           |
|-------------------|----------|----------|----------|----------|----------|-----------|
| ENSMUSG 4930432M  | 0        | 0        | 0        | 0        | 0.036908 | 0         |
| ENSMUSG Dda1      | 27.81312 | 28.95123 | 33.6879  | 25.58759 | 23.67692 | 26.855471 |
| ENSMUSG Sbp1      | 0        | 0        | 0        | 0        | 0        | 0         |
| ENSMUSG Prss30    | 0.454957 | 0.448077 | 0.348276 | 0.332114 | 0.469268 | 0.419909  |
| ENSMUSG Pdpk1     | 12.65633 | 13.33789 | 12.1901  | 11.09877 | 11.2959  | 11.893267 |
| ENSMUSG Atp6v0c   | 66.68996 | 79.83779 | 74.29293 | 88.28844 | 98.02126 | 147.83134 |
| ENSMUSG Cib3      | 0.277827 | 0.311784 | 0.107715 | 0.139808 | 0.156056 | 0.080286  |
| ENSMUSG Mei1      | 0        | 0        | 0        | 0        | 0        | 0         |
| ENSMUSG Ccdc134   | 4.510046 | 5.186005 | 4.426574 | 7.41226  | 6.736513 | 6.938248  |
| ENSMUSG Ninl      | 1.345202 | 1.42802  | 1.151908 | 0.963793 | 0.864556 | 1.104675  |
| ENSMUSG Gm4907    | 0        | 0        | 0.033946 | 0        | 0        | 0.036735  |
| ENSMUSG Cage1     | 0.541074 | 0.59796  | 0.257253 | 0.714322 | 0.529296 | 0.637669  |
| ENSMUSG Rbm7      | 30.37346 | 28.80579 | 29.46262 | 27.49865 | 26.03916 | 27.182184 |
| ENSMUSG Gatad2b   | 10.42489 | 10.34883 | 9.755734 | 8.664907 | 8.676289 | 9.06367   |
| ENSMUSG AspH      | 12.01696 | 12.7417  | 10.6058  | 11.29509 | 10.49691 | 9.906948  |
| ENSMUSG Perm1     | 0.48813  | 0.686302 | 0.495592 | 1.001139 | 0.550649 | 0.684336  |
| ENSMUSG Fgb       | 0        | 0        | 0        | 0        | 0.0147   | 0         |
| ENSMUSG Tpbpa     | 0        | 0        | 0        | 0        | 0        | 0         |
| ENSMUSG Foxh1     | 0        | 0        | 0.065104 | 0.016828 | 0.029953 | 0.032115  |
| ENSMUSG Jak2      | 16.2478  | 17.61231 | 16.36639 | 19.72738 | 19.73942 | 19.407923 |
| ENSMUSG Ak3       | 52.8067  | 58.65923 | 52.37007 | 49.22761 | 49.70298 | 48.006911 |
| ENSMUSG Klra1     | 0        | 0        | 0.212386 | 0.144075 | 0        | 0         |
| ENSMUSG Klra4     | 0        | 0        | 0        | 0        | 0        | 0         |
| ENSMUSG Snx15     | 8.730039 | 10.31697 | 12.08573 | 8.842593 | 11.11995 | 10.392873 |
| ENSMUSG Majin     | 0.205911 | 0.179882 | 0.458864 | 0.250568 | 0.053785 | 0.231117  |
| ENSMUSG Rcl1      | 6.671831 | 6.831288 | 6.71992  | 6.847386 | 6.743238 | 6.802684  |
| ENSMUSG Gpha2     | 0.052002 | 0        | 0.117504 | 0.421884 | 0.180561 | 0.14382   |
| ENSMUSG Sync      | 0.877078 | 0.733379 | 0.804492 | 0.975123 | 1.155658 | 0.661266  |
| ENSMUSG Stambp    | 11.14915 | 10.70326 | 10.88954 | 9.770065 | 9.789814 | 8.995587  |
| ENSMUSG Dnmt3b    | 1.090527 | 1.206815 | 1.117868 | 0.879919 | 0.759159 | 1.232973  |
| ENSMUSG Olfr1197  | 0        | 0        | 0        | 0        | 0        | 0         |
| ENSMUSG Ccm2l     | 26.00942 | 20.30257 | 27.07875 | 15.51853 | 14.0133  | 13.200655 |
| ENSMUSG Olfr1200  | 0        | 0        | 0        | 0        | 0        | 0         |
| ENSMUSG Olfr1198  | 0        | 0        | 0        | 0        | 0        | 0         |
| ENSMUSG Mylk2     | 0.132214 | 0.100921 | 0.034348 | 0.061386 | 0.173793 | 0         |
| ENSMUSG Gm13762   | 0        | 0        | 0        | 0        | 0        | 0         |
| ENSMUSG PdrG1     | 27.9941  | 28.15707 | 32.37746 | 27.96966 | 26.9485  | 29.003709 |
| ENSMUSG Olfr1209  | 0        | 0        | 0        | 0        | 0        | 0         |
| ENSMUSG Nmd3      | 1.880513 | 1.87733  | 1.920154 | 2.491357 | 2.138229 | 2.196928  |
| ENSMUSG Ppm1l     | 7.375756 | 7.53651  | 5.187615 | 4.96712  | 4.457917 | 4.683244  |
| ENSMUSG Kpna4     | 23.04355 | 21.32927 | 23.79781 | 17.98704 | 13.86204 | 16.537132 |
| ENSMUSG Klri2     | 0.190242 | 0.171227 | 1.087529 | 0.232451 | 0.113265 | 0.156415  |
| ENSMUSG Gimap7    | 4.042896 | 2.405016 | 6.133262 | 7.346462 | 5.722897 | 8.208629  |
| ENSMUSG A530064D  | 0.225799 | 0.215972 | 0.338327 | 0.199081 | 0.722427 | 0.453855  |
| ENSMUSG AW822075  | 0        | 0        | 0        | 0        | 0        | 0         |
| ENSMUSG Cbwd1     | 4.037864 | 4.839588 | 3.739414 | 3.376755 | 3.603575 | 3.362062  |
| ENSMUSG Yif1a     | 19.3789  | 16.11191 | 17.67428 | 15.2879  | 18.94308 | 20.762699 |
| ENSMUSG Doc2g     | 0.668689 | 1.541222 | 0.386364 | 0.609416 | 0.59261  | 0.690453  |
| ENSMUSG Rab1b     | 79.93739 | 81.46424 | 83.85029 | 79.03121 | 76.90759 | 84.220085 |
| ENSMUSG Cnih2     | 0.2969   | 0.288191 | 0.253921 | 0.470703 | 0.37761  | 0.136854  |
| ENSMUSG AL731706  | 0.030284 | 0.02362  | 0.021505 | 0.025867 | 0.032218 | 0.029344  |
| ENSMUSG Riok2     | 6.484988 | 6.908311 | 7.003896 | 5.867352 | 5.775619 | 4.855526  |
| ENSMUSG lqj       | 0        | 0        | 0        | 0        | 0        | 0         |
| ENSMUSG Ccdc87    | 0.28927  | 0.185874 | 0.128184 | 0.365857 | 0.39782  | 0.557276  |
| Mus_musc Mus_musc | 0.095335 | 0.28759  | 0.22412  | 0.2333   | 0.04976  | 0.189354  |
| Mus_musc Mus_musc | 0        | 0        | 0        | 0        | 0        | 0.34627   |
| ENSMUSG Zbtb43    | 7.13118  | 6.471622 | 5.868729 | 6.00057  | 5.637368 | 6.041381  |
| ENSMUSG Pkn3      | 6.436896 | 6.416787 | 8.704529 | 5.035926 | 4.086505 | 5.489183  |
| ENSMUSG Pdss1     | 1.708107 | 1.6411   | 1.257521 | 1.508022 | 1.425483 | 1.392973  |
| ENSMUSG Gad2      | 0.041312 | 0.016119 | 0.032381 | 0.007301 | 0.017356 | 0         |
| ENSMUSG Apbb1ip   | 10.37024 | 8.111697 | 10.89379 | 13.20546 | 12.32116 | 12.035306 |
| ENSMUSG Acbd5     | 28.17391 | 27.20985 | 26.55928 | 21.71592 | 22.36695 | 20.284904 |
| ENSMUSG Abi2      | 6.057204 | 5.35379  | 5.086572 | 4.574254 | 4.643955 | 4.628166  |
| ENSMUSG UbfD1     | 7.862306 | 8.657938 | 8.564759 | 7.614708 | 9.162523 | 9.889244  |

|                   |          |          |          |          |          |           |
|-------------------|----------|----------|----------|----------|----------|-----------|
| ENSMUSG Ears2     | 1.629448 | 1.811754 | 1.953007 | 2.440123 | 1.34178  | 1.885369  |
| ENSMUSG Gga2      | 7.97231  | 6.952094 | 6.019088 | 10.88884 | 9.886223 | 11.45381  |
| ENSMUSG Scnn1b    | 44.80586 | 45.32718 | 38.63672 | 23.07385 | 22.9621  | 21.211133 |
| ENSMUSG Mettl9    | 22.71204 | 19.23254 | 21.74314 | 20.86806 | 22.65562 | 21.358988 |
| ENSMUSG Mfsd13b   | 0        | 0.038024 | 0.026915 | 0.113023 | 0        | 0         |
| ENSMUSG Cdr2      | 15.67806 | 15.59316 | 18.64326 | 10.10569 | 11.2408  | 11.436252 |
| ENSMUSG Mrpl17    | 7.971683 | 5.188492 | 3.289945 | 3.609317 | 4.095998 | 4.949313  |
| ENSMUSG Cd247     | 4.940018 | 3.84711  | 6.358899 | 7.587584 | 6.836243 | 7.548033  |
| ENSMUSG Cdk18     | 5.913249 | 4.893785 | 6.241001 | 4.978491 | 4.902121 | 5.411537  |
| ENSMUSG Elk4      | 25.99463 | 25.09021 | 26.04622 | 21.02991 | 20.30166 | 17.420391 |
| ENSMUSG Slc45a3   | 2.815964 | 3.168008 | 2.941762 | 3.459357 | 2.695702 | 3.534149  |
| ENSMUSG Nucks1    | 14.36672 | 13.79972 | 12.11562 | 11.42025 | 11.68866 | 10.729414 |
| ENSMUSG Rab29     | 11.50079 | 9.150242 | 10.47291 | 11.20663 | 12.09131 | 12.639831 |
| ENSMUSG Avpr1b    | 0        | 0        | 0        | 0        | 0        | 0         |
| ENSMUSG Rassf5    | 12.47762 | 11.51834 | 15.32948 | 12.32706 | 11.82405 | 13.287182 |
| Mus_musc Mus_musc | 1.413453 | 1.534578 | 1.33133  | 0.936822 | 1.099393 | 0.762663  |
| Mus_musc Mus_musc | 0        | 0        | 0        | 0        | 0        | 0         |
| ENSMUSG Rbbp5     | 12.24171 | 11.82335 | 11.28807 | 12.10687 | 11.27294 | 10.715764 |
| Mus_musc Mus_musc | 0.169751 | 0        | 0.168936 | 0.198991 | 0        | 0         |
| ENSMUSG Gm3055    | 0.632024 | 0.639571 | 0.651208 | 0.598366 | 0.662244 | 0.560003  |
| ENSMUSG Cldn34c3  | 0        | 0        | 0        | 0        | 0        | 0         |
| ENSMUSG Col26a1   | 0.060581 | 0.046998 | 0.027336 | 0.142229 | 0.149636 | 0.081066  |
| ENSMUSG Tmem121l  | 0.830675 | 0.737858 | 0.589177 | 0.644281 | 0.509349 | 0.591522  |
| ENSMUSG Gm4836    | 0        | 0        | 0        | 0        | 0        | 0         |
| ENSMUSG Gm3252    | 0        | 0.035628 | 0        | 0        | 0        | 0         |
| ENSMUSG Sema4c    | 9.309121 | 8.74467  | 11.33966 | 9.129489 | 9.657627 | 9.519856  |
| ENSMUSG Cd24a     | 115.0838 | 134.8381 | 97.59832 | 205.6649 | 208.647  | 203.5215  |
| ENSMUSG Prss39    | 0        | 0        | 0        | 0        | 0        | 0         |
| ENSMUSG Lrrn4cl   | 1.258676 | 1.329184 | 1.480333 | 0.845319 | 0.576274 | 0.898327  |
| ENSMUSG Ubxn1     | 70.66872 | 71.69015 | 80.63631 | 67.44483 | 72.19613 | 71.007254 |
| ENSMUSG Ptpn18    | 9.74226  | 9.09911  | 12.62968 | 19.46772 | 13.24932 | 14.173337 |
| Mus_musc Mus_musc | 0        | 0        | 0        | 0        | 0        | 0         |
| Mus_musc Mus_musc | 0        | 0        | 0        | 0        | 0        | 0.184186  |
| Mus_musc Mus_musc | 0        | 0.0668   | 0.135783 | 0        | 0        | 0.070432  |
| Mus_musc Mus_musc | 0.132691 | 0.266816 | 0        | 0        | 0.129249 | 0         |
| Mus_musc Mus_musc | 1.041637 | 0.936152 | 0.698859 | 0.478398 | 0.566542 | 0.907864  |
| Mus_musc Mus_musc | 0.076476 | 0.02777  | 0.312524 | 0.411723 | 0.05982  | 0.326989  |
| Mus_musc Mus_musc | 0        | 0        | 0        | 0.306187 | 0        | 0         |
| ENSMUSG St7       | 5.737228 | 5.685308 | 5.28686  | 4.946161 | 4.851288 | 4.94194   |
| Mus_musc Mus_musc | 0.139535 | 0.131128 | 0.049076 | 0.05811  | 0.133979 | 0         |
| Mus_musc Mus_musc | 0.192228 | 0.416486 | 0.378425 | 0.171917 | 0.244457 | 0.2845    |
| ENSMUSG Tmem64    | 10.63324 | 10.38564 | 10.58188 | 10.56155 | 10.22223 | 9.732449  |
| ENSMUSG Exoc3l    | 8.581105 | 7.005837 | 9.416091 | 6.084475 | 6.342261 | 5.727799  |
| Mus_musc Mus_musc | 0        | 0        | 0        | 0.174016 | 0        | 0         |
| Mus_musc Mus_musc | 0        | 0.173943 | 0.32224  | 0.086002 | 0.415592 | 0.100713  |
| Mus_musc Mus_musc | 0        | 0        | 0.054259 | 0        | 0        | 0.184276  |
| Mus_musc Mus_musc | 0.170265 | 0.0421   | 0        | 0.237703 | 0.108603 | 0.333742  |
| ENSMUSG Fam13c    | 6.272205 | 8.224263 | 7.208464 | 5.309255 | 5.433528 | 4.903382  |
| Mus_musc Mus_musc | 0        | 0        | 0        | 0.364534 | 0.119097 | 0.160687  |
| Mus_musc Mus_musc | 0.574836 | 0.412465 | 0.570019 | 0.470421 | 0.741379 | 0.487529  |
| Mus_musc Mus_musc | 0.505191 | 0.102089 | 0        | 0.079581 | 0.158802 | 0.186713  |
| Mus_musc Mus_musc | 0.457851 | 0.307058 | 0.3076   | 0        | 0.360723 | 0.512468  |
| Mus_musc Mus_musc | 0.05073  | 0.10589  | 0        | 0.149521 | 0        | 0.134494  |
| Mus_musc Mus_musc | 0.242962 | 0        | 0.285673 | 0        | 0        | 0         |
| ENSMUSG Inpp5k    | 54.47784 | 47.2216  | 44.23414 | 34.27531 | 31.45166 | 31.015542 |
| ENSMUSG Gm21738   | 0        | 0        | 0.134409 | 0        | 0        | 0         |
| ENSMUSG Olfr117   | 0        | 0        | 0        | 0        | 0        | 0         |
| ENSMUSG Cfap97d1  | 0.134227 | 0.0831   | 0.131703 | 0        | 0        | 0         |
| Mus_musc Mus_musc | 0.101044 | 0        | 0.421197 | 0.093408 | 0.282066 | 0.290808  |
| Mus_musc Mus_musc | 0.123251 | 0        | 0        | 0.152343 | 0.097727 | 0.293235  |
| Mus_musc Mus_musc | 0.188077 | 0        | 0        | 0        | 0        | 0         |
| ENSMUSG 2410141K  | 0        | 0        | 0        | 0        | 0        | 0         |
| Mus_musc Mus_musc | 0.278797 | 0.600214 | 0.821457 | 0.89829  | 0.799128 | 0.203807  |
| Mus_musc Mus_musc | 0.157902 | 0.05544  | 0.151739 | 0.149216 | 0.196977 | 0.38249   |

|                   |          |          |          |          |          |           |
|-------------------|----------|----------|----------|----------|----------|-----------|
| Mus_musc Mus_musc | 0        | 0        | 0        | 0        | 0        | 0         |
| Mus_musc Mus_musc | 0.517491 | 0.418812 | 0.420316 | 0.342592 | 0.199367 | 0.403606  |
| ENSMUSG Anapc1    | 16.07998 | 16.36805 | 13.87805 | 13.60011 | 14.47345 | 14.095265 |
| ENSMUSG Tmem87b   | 13.02369 | 13.31199 | 11.8796  | 10.51513 | 11.64139 | 10.045034 |
| ENSMUSG Gpbar1    | 0        | 0        | 0        | 0        | 0        | 0.025745  |
| ENSMUSG Gip       | 0        | 0        | 0        | 0        | 0        | 0         |
| ENSMUSG Hspb9     | 0.289794 | 0.22397  | 0.350965 | 0.173938 | 0.430479 | 0.107978  |
| ENSMUSG Rab5a     | 36.5481  | 33.29064 | 34.49702 | 28.77069 | 31.40507 | 28.838221 |
| ENSMUSG Derl3     | 1.524606 | 1.273139 | 0.835985 | 24.71098 | 27.49699 | 22.738395 |
| ENSMUSG Gstt4     | 0        | 0        | 0        | 0.025633 | 0.05442  | 0         |
| ENSMUSG Ap1b1     | 18.36513 | 18.0115  | 17.85802 | 20.32728 | 20.75345 | 22.607525 |
| Mus_musc Mus_musc | 0        | 0        | 0.168936 | 0        | 0        | 0.140651  |
| Mus_musc Mus_musc | 0        | 0.104596 | 0.200082 | 1.370632 | 0.528011 | 1.007711  |
| ENSMUSG Tbx1      | 2.239708 | 3.63805  | 1.77266  | 2.863882 | 2.51392  | 2.15776   |
| Mus_musc Mus_musc | 0        | 0        | 0        | 0        | 0        | 0         |
| ENSMUSG Gm34653   | 0        | 0.105541 | 0        | 0        | 0        | 0         |
| Mus_musc Mus_musc | 11.31993 | 14.95804 | 18.85184 | 20.2261  | 17.22786 | 21.616335 |
| Mus_musc Mus_musc | 0        | 0        | 0.169288 | 0.205919 | 0        | 0.42478   |
| Mus_musc Mus_musc | 1.853723 | 1.181525 | 1.033484 | 0.543895 | 0.691436 | 0.740423  |
| ENSMUSG Afnid     | 0.987705 | 0.779168 | 1.041022 | 2.295298 | 1.317097 | 1.633288  |
| ENSMUSG Tha1      | 2.508574 | 2.399291 | 2.769121 | 2.601591 | 2.319419 | 2.993917  |
| ENSMUSG Birc5     | 0.724734 | 1.254555 | 1.611932 | 3.768973 | 6.154414 | 7.152597  |
| Mus_musc Mus_musc | 0        | 0        | 0        | 0.334967 | 0.041031 | 0         |
| Mus_musc Mus_musc | 0.178378 | 0.441026 | 0.106976 | 0.190477 | 0.117494 | 0.096005  |
| Mus_musc Mus_musc | 0        | 0        | 0        | 0.104633 | 0        | 0         |
| Mus_musc Mus_musc | 0        | 0.254636 | 0        | 0        | 0        | 0         |
| Mus_musc Mus_musc | 0        | 0        | 0        | 0        | 0        | 0.552559  |
| Mus_musc Mus_musc | 0        | 0.217089 | 0.02522  | 0        | 0.120618 | 0.096069  |
| Mus_musc Mus_musc | 0.290972 | 0.670128 | 0.417356 | 0.408334 | 0.360484 | 0.256011  |
| Mus_musc Mus_musc | 0        | 0        | 0        | 0        | 0.071579 | 0         |
| Mus_musc Mus_musc | 0.346392 | 0.348929 | 0.108838 | 0.088389 | 0.048808 | 0.027688  |
| ENSMUSG Ace2      | 5.387073 | 5.41191  | 3.82153  | 2.373715 | 2.708366 | 3.160964  |
| ENSMUSG Cltrn     | 0        | 0        | 0.034298 | 0        | 0.038037 | 0         |
| ENSMUSG Ubxn6     | 16.08075 | 16.39911 | 15.1527  | 13.71731 | 15.6018  | 14.530187 |
| ENSMUSG Gm10999   | 0        | 0        | 0        | 0        | 0        | 0         |
| ENSMUSG Snapc3    | 8.315079 | 6.077427 | 6.549151 | 6.420135 | 6.251655 | 8.455864  |
| ENSMUSG Pdk4      | 2.64712  | 5.356467 | 2.781628 | 1.803195 | 2.615113 | 1.546313  |
| Mus_musc Mus_musc | 0.131648 | 0.470405 | 0.203459 | 0.471172 | 0.39812  | 0.411186  |
| Mus_musc Mus_musc | 2.857764 | 3.242025 | 2.771732 | 2.256964 | 2.575407 | 2.86307   |
| Mus_musc Mus_musc | 0        | 0        | 0        | 0        | 0        | 0         |
| Mus_musc Mus_musc | 0        | 0        | 0        | 0.360253 | 0.077544 | 0.457627  |
| ENSMUSG Smim17    | 0        | 0        | 0.15647  | 0.043504 | 0.10881  | 0         |
| ENSMUSG Vmn2r-ps: | 0        | 0        | 0        | 0        | 0        | 0         |
| ENSMUSG Ankrd55   | 0.369223 | 0.395456 | 0.281212 | 5.692346 | 7.384978 | 8.765145  |
| ENSMUSG Serpina6  | 0        | 0        | 0        | 0        | 0        | 0.064264  |
| ENSMUSG Spire2    | 1.961502 | 2.070732 | 1.89738  | 1.910705 | 2.210341 | 2.998042  |
| ENSMUSG Gm21969   | 0        | 0        | 0.007093 | 0.012141 | 0        | 0         |
| ENSMUSG Ccnq      | 9.312165 | 9.131982 | 9.083906 | 9.303466 | 7.787392 | 7.881335  |
| ENSMUSG Tmem67    | 3.698822 | 3.657011 | 3.125128 | 3.892436 | 3.551112 | 3.954011  |
| ENSMUSG Amy1      | 0.476151 | 2.205466 | 1.423607 | 1.477551 | 0.467674 | 0.800171  |
| ENSMUSG Washc1    | 11.58058 | 13.22877 | 15.83951 | 12.67051 | 10.94502 | 12.734289 |
| ENSMUSG Kif14     | 0.082    | 0.082219 | 0.128379 | 0.323301 | 0.365201 | 0.354388  |
| ENSMUSG Cep78     | 2.935076 | 2.820444 | 2.432833 | 3.105144 | 3.044595 | 2.905704  |
| ENSMUSG 4930523C  | 19.25369 | 16.4366  | 15.79948 | 10.05938 | 10.28863 | 10.529602 |
| ENSMUSG Nrnx1     | 0.390083 | 0.538258 | 0.422065 | 0.291801 | 0.380691 | 0.325171  |
| ENSMUSG Gm9972    | 0        | 0        | 0        | 0        | 0        | 0         |
| Mus_musc Mus_musc | 0.220534 | 0.721997 | 0.222295 | 0        | 0.177113 | 0.194687  |
| ENSMUSG Gal3st2b  | 0.069009 | 0.185696 | 0.043941 | 0.046543 | 0.015432 | 0.057719  |
| ENSMUSG H2-Eb2    | 0.227783 | 0.214315 | 0.237409 | 2.934891 | 3.20766  | 2.758043  |
| ENSMUSG Rps19bp1  | 10.83631 | 12.06763 | 13.50484 | 13.00179 | 12.42014 | 12.03062  |
| ENSMUSG Arhgef39  | 0.6525   | 0.354009 | 0.822989 | 1.103676 | 0.722841 | 1.143642  |
| ENSMUSG Fam181b   | 2.310637 | 2.174736 | 1.978484 | 1.163988 | 1.379827 | 1.873403  |
| ENSMUSG Mafg      | 17.4587  | 18.13032 | 19.02186 | 14.45299 | 14.27526 | 15.914908 |
| ENSMUSG Cep126    | 3.380602 | 4.923633 | 2.886225 | 4.580056 | 5.231492 | 4.333851  |

|                   |          |          |          |          |          |           |
|-------------------|----------|----------|----------|----------|----------|-----------|
| ENSMUSG Esrp1     | 9.250093 | 9.369449 | 6.835653 | 8.365676 | 8.416428 | 9.004549  |
| ENSMUSG Rcsd1     | 30.85478 | 27.4936  | 32.20614 | 20.93762 | 20.33966 | 19.44248  |
| ENSMUSG Scamp5    | 2.092745 | 1.857526 | 2.107592 | 4.795973 | 4.350757 | 5.114753  |
| ENSMUSG Zfhx2     | 1.311071 | 1.513291 | 1.312753 | 1.34249  | 1.359369 | 1.210595  |
| ENSMUSG Virma     | 11.59415 | 10.35038 | 10.08998 | 9.980937 | 11.06591 | 10.474265 |
| ENSMUSG Hesx1     | 0        | 0        | 0        | 0        | 0        | 0         |
| ENSMUSG Hnrnpul1  | 47.15153 | 46.08379 | 43.21752 | 43.89571 | 45.82519 | 46.290561 |
| ENSMUSG Kcna2     | 1.607141 | 2.059524 | 1.689331 | 1.349003 | 1.413986 | 1.791459  |
| ENSMUSG Rps12     | 233.6888 | 208.2006 | 223.5351 | 249.6897 | 249.0438 | 258.18098 |
| ENSMUSG Flot2     | 39.21827 | 35.32969 | 35.08166 | 29.2834  | 31.18874 | 32.629402 |
| ENSMUSG Olfr392   | 0        | 0        | 0        | 0        | 0        | 0         |
| ENSMUSG Acvr2a    | 11.02846 | 11.25643 | 9.027212 | 6.892611 | 7.701487 | 6.913752  |
| ENSMUSG Plpp2     | 10.14984 | 7.677169 | 9.445742 | 11.09002 | 9.613584 | 11.275617 |
| ENSMUSG Olfr340   | 0        | 0        | 0        | 0        | 0        | 0         |
| ENSMUSG Ribc1     | 0.431674 | 1.234372 | 0.715794 | 1.421151 | 1.375309 | 1.652302  |
| ENSMUSG Zfhx4     | 0.177149 | 0.268433 | 0.140565 | 0.154174 | 0.082299 | 0.153334  |
| ENSMUSG Tas2r118  | 0        | 0        | 0        | 0        | 0        | 0         |
| ENSMUSG Tcte1     | 1.227187 | 1.16921  | 0.75812  | 2.321019 | 1.746569 | 1.898033  |
| ENSMUSG Lrrc25    | 1.952366 | 1.642025 | 3.406276 | 5.548007 | 4.121336 | 5.521044  |
| ENSMUSG Zdhhc8    | 12.4898  | 11.76389 | 12.77787 | 9.353174 | 9.276602 | 9.189497  |
| ENSMUSG Sgo1      | 0.149057 | 0.137636 | 0.166142 | 0.434945 | 0.449029 | 0.542811  |
| ENSMUSG Slc29a1   | 48.41917 | 52.86935 | 51.81624 | 34.83881 | 36.13308 | 33.904709 |
| ENSMUSG Sult1c1   | 0.026344 | 0        | 0        | 0        | 0        | 0         |
| ENSMUSG Hsp90ab1  | 390.1379 | 631.9929 | 599.9075 | 405.502  | 478.8592 | 501.65892 |
| ENSMUSG Slc5a7    | 0        | 0.016801 | 0        | 0.010045 | 0        | 0         |
| ENSMUSG Nfkbie    | 4.285649 | 3.915938 | 5.628884 | 9.982095 | 8.73471  | 9.103642  |
| ENSMUSG Khdc1a    | 0        | 0        | 0.027207 | 0        | 0.028115 | 0         |
| ENSMUSG Mrpl42    | 27.90953 | 34.81504 | 36.42132 | 40.00175 | 37.69817 | 38.589167 |
| ENSMUSG Cped1     | 31.47982 | 31.60133 | 28.50904 | 20.35934 | 21.30298 | 18.841868 |
| ENSMUSG Olfr715b  | 0        | 0        | 0        | 0        | 0        | 0         |
| ENSMUSG Ccdc152   | 2.653403 | 1.822302 | 1.83986  | 1.264915 | 0.98573  | 1.228768  |
| ENSMUSG Gm3138    | 0        | 0        | 0        | 0        | 0        | 0         |
| ENSMUSG Gm2832    | 0        | 0        | 0        | 0        | 0        | 0         |
| ENSMUSG Olfr1316  | 0        | 0        | 0        | 0        | 0        | 0         |
| ENSMUSG Olfr663   | 0        | 0        | 0        | 0        | 0        | 0         |
| ENSMUSG Gm45623   | 0.371804 | 0.089811 | 0.086961 | 0.172822 | 0.171188 | 0.21579   |
| ENSMUSG Gm4869    | 0        | 0        | 0        | 0        | 0.015416 | 0         |
| ENSMUSG Styx      | 3.38199  | 3.221374 | 2.57038  | 3.14859  | 2.278389 | 2.315308  |
| Mus_musc Mus_musc | 0        | 0        | 0        | 0        | 0        | 0.184186  |
| ENSMUSG Akap13    | 36.67013 | 32.23206 | 32.38771 | 25.49855 | 29.90848 | 30.107557 |
| ENSMUSG Stard13   | 24.20484 | 27.06036 | 24.70168 | 19.92755 | 21.48846 | 18.396037 |
| ENSMUSG Tmpo      | 31.62813 | 31.40855 | 31.98987 | 26.20337 | 28.43624 | 26.962585 |
| ENSMUSG Dusp6     | 73.51831 | 54.97549 | 74.92029 | 27.97005 | 32.7985  | 33.087198 |
| ENSMUSG Kitl      | 71.18335 | 65.26145 | 61.12136 | 37.8794  | 41.90337 | 37.227648 |
| ENSMUSG Psen1     | 26.10799 | 25.73035 | 25.32933 | 27.52516 | 28.49009 | 28.179488 |
| ENSMUSG Rnf130    | 38.58568 | 34.91123 | 40.55179 | 30.80147 | 34.09293 | 33.969053 |
| ENSMUSG Ltc4s     | 13.63553 | 11.86603 | 15.05217 | 7.083363 | 6.263429 | 7.019311  |
| ENSMUSG Rasgef1c  | 0.325214 | 0.139647 | 0.066014 | 0.031702 | 0        | 0.065321  |
| ENSMUSG Rufy1     | 13.1834  | 13.37215 | 13.55312 | 12.29701 | 13.34506 | 13.395576 |
| ENSMUSG Rack1     | 307.6367 | 299.4801 | 304.2684 | 366.5304 | 354.7191 | 394.73334 |
| ENSMUSG Fam172a   | 8.116536 | 6.982751 | 6.812837 | 6.043716 | 6.589832 | 6.121254  |
| ENSMUSG Vmn2r73   | 0        | 0        | 0        | 0        | 0        | 0         |
| ENSMUSG Olfr290   | 0        | 0        | 0        | 0        | 0        | 0         |
| ENSMUSG Gm16429   | 0        | 0        | 0        | 0        | 0        | 0         |
| ENSMUSG Gm20908   | 0        | 0        | 0        | 0        | 0        | 0         |
| ENSMUSG Gm11361   | 41.2867  | 28.66237 | 43.22548 | 51.36331 | 43.75313 | 48.645241 |
| ENSMUSG Gm49496   | 0        | 0        | 0        | 0        | 0        | 0         |
| ENSMUSG Serpinb9d | 0        | 0        | 0        | 0.052762 | 0        | 0         |
| Mus_musc Mus_musc | 0        | 0.280562 | 0.112112 | 0.121284 | 0        | 0         |
| ENSMUSG Lifr      | 18.71039 | 20.97269 | 19.18347 | 13.46352 | 14.99764 | 13.820446 |
| ENSMUSG Olfr119   | 0        | 0        | 0        | 0        | 0        | 0         |
| ENSMUSG Dalrd3    | 20.568   | 20.00182 | 20.74257 | 22.04136 | 19.00019 | 19.199298 |
| ENSMUSG Gabrb3    | 0        | 0.020261 | 0        | 0        | 0        | 0         |
| ENSMUSG Cdkl1     | 0.473697 | 0.936384 | 0.656178 | 1.429889 | 0.886442 | 1.53996   |

|                   |          |          |          |          |          |           |
|-------------------|----------|----------|----------|----------|----------|-----------|
| ENSMUSG Pnn       | 19.82933 | 22.35407 | 24.04613 | 18.57961 | 18.48651 | 17.896164 |
| ENSMUSG Epha4     | 4.998772 | 5.486648 | 4.850394 | 3.198588 | 3.716242 | 3.634507  |
| ENSMUSG Ncl       | 30.78014 | 28.32768 | 29.12007 | 28.58915 | 28.81905 | 28.908022 |
| ENSMUSG Nmur1     | 0.356083 | 0.565745 | 0.549726 | 0.803473 | 0.909186 | 0.990446  |
| ENSMUSG Ctrc      | 0        | 0        | 0        | 0        | 0        | 0         |
| ENSMUSG Pde6d     | 17.30506 | 17.68799 | 19.24687 | 16.62198 | 16.55365 | 19.282213 |
| ENSMUSG Ptma      | 582.3923 | 604.4897 | 620.9081 | 571.716  | 561.1499 | 594.20329 |
| ENSMUSG Cntn6     | 0.026463 | 0        | 0        | 0.017392 | 0.015079 | 0         |
| ENSMUSG Wnt7a     | 4.827997 | 3.952935 | 5.657018 | 2.828311 | 2.263086 | 2.993317  |
| ENSMUSG Nup210    | 8.345223 | 7.132028 | 8.868041 | 9.596301 | 9.255594 | 10.194695 |
| ENSMUSG Slc6a6    | 47.69333 | 41.05161 | 41.63967 | 38.40918 | 37.37685 | 41.112611 |
| ENSMUSG Xpc       | 12.88769 | 12.19146 | 12.10344 | 9.562468 | 9.349064 | 9.030406  |
| ENSMUSG Tmem43    | 31.81284 | 33.03117 | 31.62051 | 23.99945 | 28.77268 | 26.942015 |
| ENSMUSG Grip2     | 0.092006 | 0.187691 | 0.123091 | 0.085337 | 0.067541 | 0.068736  |
| ENSMUSG Arhgdig   | 4.831788 | 4.358727 | 4.59372  | 5.695224 | 4.75471  | 5.308098  |
| ENSMUSG Gm10696   | 0        | 0        | 0        | 0        | 0        | 0         |
| ENSMUSG Nme3      | 10.6666  | 10.96037 | 13.63207 | 10.57432 | 7.44297  | 7.953516  |
| ENSMUSG Wdr90     | 2.226057 | 2.012538 | 2.055947 | 2.428995 | 2.588454 | 2.65926   |
| ENSMUSG Eme2      | 4.392845 | 4.092317 | 3.33432  | 4.158273 | 3.898086 | 3.474329  |
| ENSMUSG Gemin4    | 3.730741 | 3.767401 | 3.354624 | 3.587216 | 3.572469 | 3.734662  |
| ENSMUSG Slc25a1   | 25.59897 | 24.79405 | 21.77576 | 24.91659 | 25.43206 | 30.420746 |
| ENSMUSG Fsd2      | 0.9428   | 1.922283 | 0.804513 | 1.54798  | 1.408908 | 1.300905  |
| ENSMUSG Dgki      | 0        | 0        | 0        | 0.070084 | 0.094971 | 0.032942  |
| ENSMUSG Herc1     | 10.06997 | 10.13259 | 8.627311 | 9.347283 | 9.43216  | 10.35099  |
| ENSMUSG Vmn1r209  | 0        | 0        | 0        | 0        | 0        | 0         |
| ENSMUSG Lpar1     | 5.027996 | 4.937681 | 6.385425 | 5.135384 | 5.893995 | 4.379858  |
| ENSMUSG Vmn1r208  | 0        | 0        | 0        | 0        | 0        | 0         |
| ENSMUSG Olfr455   | 0.073716 | 0.150596 | 0.250955 | 0.012877 | 0.215766 | 0.040708  |
| ENSMUSG Nutf2-ps1 | 3.007052 | 3.807488 | 3.298263 | 3.041053 | 2.36974  | 8.422151  |
| ENSMUSG Ess2      | 7.275684 | 6.419166 | 6.448315 | 6.355358 | 6.478228 | 6.411092  |
| ENSMUSG Rho       | 0.029663 | 0.093157 | 0.052863 | 0.008624 | 0.046542 | 0.023915  |
| ENSMUSG Klrb1c    | 0.788372 | 0.490873 | 2.315983 | 0.471368 | 0.29214  | 0.704242  |
| ENSMUSG Necap1    | 13.84902 | 13.07142 | 13.45578 | 11.89238 | 14.67846 | 13.06094  |
| ENSMUSG Efcab12   | 0.581483 | 0.981606 | 0.653381 | 1.244573 | 1.057873 | 1.084887  |
| ENSMUSG Mbd4      | 1.836848 | 2.064885 | 2.079006 | 2.688981 | 2.785902 | 3.098983  |
| ENSMUSG Ift122    | 4.743197 | 5.3059   | 4.00419  | 4.100791 | 4.387697 | 4.77347   |
| ENSMUSG Zfp820    | 1.80701  | 2.007704 | 1.767733 | 2.006147 | 1.279986 | 1.301896  |
| ENSMUSG Psmb3     | 71.11332 | 69.82072 | 78.69844 | 70.21541 | 66.54059 | 68.485306 |
| ENSMUSG Pianp     | 15.23689 | 12.29832 | 13.82809 | 16.19614 | 14.90339 | 16.324773 |
| ENSMUSG 2310022A  | 5.66149  | 6.253946 | 5.111422 | 6.156867 | 6.32727  | 6.982828  |
| ENSMUSG Vgll2     | 0        | 0        | 0        | 0        | 0        | 0         |
| ENSMUSG Gpr3      | 0.113793 | 0        | 0.014089 | 0        | 0.088636 | 0.065833  |
| ENSMUSG Olfr273   | 0        | 0        | 0        | 0        | 0        | 0         |
| ENSMUSG Olfr669   | 0        | 0        | 0        | 0        | 0        | 0         |
| ENSMUSG Lin54     | 4.862902 | 5.013191 | 4.52702  | 4.339269 | 4.469221 | 4.189917  |
| ENSMUSG Gnptab    | 12.52736 | 13.56374 | 12.88739 | 17.51689 | 18.46437 | 19.310417 |
| ENSMUSG Slc4a10   | 0.127012 | 0.035748 | 0.098336 | 0.023712 | 0.032285 | 0.06125   |
| ENSMUSG Zfp866    | 8.652571 | 9.929167 | 9.666462 | 9.230132 | 8.370265 | 9.060863  |
| ENSMUSG Tuba1c    | 43.43435 | 37.76174 | 47.14241 | 51.5851  | 56.45917 | 62.335777 |
| ENSMUSG 11-Mar    | 0        | 0        | 0        | 0        | 0        | 0         |
| ENSMUSG Hic1      | 6.247193 | 5.258296 | 7.01643  | 5.515471 | 4.566639 | 6.098634  |
| ENSMUSG Ank       | 6.24925  | 8.067101 | 6.591996 | 6.375418 | 6.711771 | 6.008801  |
| ENSMUSG Dnah5     | 2.562408 | 3.070993 | 1.326797 | 4.417158 | 4.375343 | 4.177154  |
| ENSMUSG Trio      | 7.371468 | 7.406697 | 6.854178 | 6.551234 | 6.551187 | 7.380552  |
| ENSMUSG Sdc2      | 20.63915 | 20.492   | 21.52085 | 13.97167 | 11.84046 | 10.801268 |
| ENSMUSG Commd6    | 14.57979 | 17.50282 | 16.70399 | 16.62342 | 17.77104 | 18.604419 |
| ENSMUSG Gm10842   | 0        | 0        | 0        | 0        | 0        | 0         |
| ENSMUSG Gm10840   | 0.006694 | 0        | 0        | 0        | 0        | 0         |
| ENSMUSG Adam21    | 0        | 0.012727 | 0.031338 | 0.089549 | 0        | 0.032902  |
| ENSMUSG Rdh13     | 5.147119 | 5.007546 | 5.048171 | 4.92478  | 5.600212 | 6.01344   |
| ENSMUSG Adam26a   | 0        | 0        | 0        | 0        | 0        | 0         |
| ENSMUSG Zfp518b   | 1.351648 | 1.446692 | 1.375659 | 1.233128 | 1.584396 | 1.438124  |
| ENSMUSG Lyrn4     | 2.485529 | 2.444144 | 2.535177 | 1.666846 | 1.9269   | 2.088818  |
| ENSMUSG Prr12     | 10.17998 | 10.50442 | 9.780191 | 7.860729 | 7.902618 | 7.943068  |

|                    |          |          |          |          |          |           |
|--------------------|----------|----------|----------|----------|----------|-----------|
| ENSMUSG Tpr        | 25.05017 | 25.17493 | 23.53762 | 22.89401 | 23.63342 | 24.381159 |
| ENSMUSG Pdc        | 0        | 0        | 0        | 0        | 0        | 0         |
| ENSMUSG Prrt3      | 0.134804 | 0.108194 | 0.095554 | 0.079496 | 0.122858 | 0.06799   |
| ENSMUSG 9030612E(C | 0        | 0        | 0.050163 | 0.026304 | 0.041074 | 0         |
| ENSMUSG Hdgf       | 53.52229 | 57.33205 | 57.13043 | 41.8927  | 45.98917 | 47.967985 |
| ENSMUSG Rrnad1     | 6.156678 | 6.351889 | 7.9137   | 5.340136 | 4.865664 | 4.892519  |
| ENSMUSG Nes        | 30.13314 | 25.53015 | 31.34285 | 15.56459 | 13.72932 | 15.528946 |
| ENSMUSG Bcan       | 2.368921 | 2.141563 | 2.08723  | 1.553735 | 1.44694  | 1.832011  |
| ENSMUSG Wdr60      | 4.064835 | 4.222397 | 3.279327 | 3.485321 | 3.186388 | 3.318041  |
| ENSMUSG Fzd5       | 7.064053 | 6.707892 | 6.903941 | 5.604841 | 4.865173 | 5.191749  |
| ENSMUSG Spata21    | 0        | 0        | 0        | 0.011505 | 0.006652 | 0         |
| ENSMUSG Wdr11      | 12.2787  | 11.91508 | 11.82657 | 11.70398 | 12.02607 | 11.587646 |
| ENSMUSG Cebpa      | 33.36562 | 37.5233  | 30.50044 | 41.11387 | 43.35024 | 47.028374 |
| ENSMUSG Cog7       | 15.40669 | 13.72685 | 13.68346 | 12.22878 | 12.98001 | 13.900508 |
| ENSMUSG Rubcnl     | 1.168079 | 0.678821 | 1.239594 | 2.806839 | 1.798718 | 2.135789  |
| ENSMUSG Atcay      | 0.030198 | 0.040312 | 0.05892  | 0.14891  | 0.129475 | 0.229846  |
| ENSMUSG AW146154   | 1.824919 | 1.788585 | 1.730843 | 1.815146 | 1.487564 | 1.707347  |
| ENSMUSG Zfp788     | 4.729206 | 4.943531 | 4.935898 | 3.84307  | 4.077875 | 4.106207  |
| ENSMUSG Fam110a    | 17.28101 | 15.9095  | 14.7518  | 10.78377 | 12.39343 | 12.708226 |
| ENSMUSG ldnk       | 12.43608 | 14.87351 | 19.1335  | 19.22772 | 14.64783 | 19.466867 |
| ENSMUSG Olfr225    | 0        | 0        | 0        | 0        | 0        | 0         |
| ENSMUSG Cep68      | 7.768084 | 7.207207 | 6.391706 | 6.563428 | 6.471188 | 6.15239   |
| ENSMUSG Gpr22      | 0        | 0.030277 | 0        | 0.033498 | 0        | 0.012046  |
| ENSMUSG Zrsr1      | 15.97605 | 17.70833 | 15.61697 | 11.35188 | 11.56894 | 10.984808 |
| ENSMUSG Sdcbp2     | 1.43799  | 1.836821 | 1.380712 | 2.992792 | 2.124947 | 2.414959  |
| ENSMUSG Gm16381    | 0.055076 | 0.023008 | 0        | 0        | 0        | 0         |
| ENSMUSG Olfr1163   | 0        | 0        | 0        | 0        | 0        | 0         |
| ENSMUSG Rragb      | 1.198426 | 1.661664 | 2.058055 | 1.244323 | 1.631996 | 1.470985  |
| ENSMUSG Pcca       | 9.331637 | 11.48787 | 9.254233 | 11.2743  | 8.351785 | 10.239669 |
| ENSMUSG Pnpla3     | 0.110556 | 0.955472 | 0.128278 | 0.656353 | 0.263758 | 0.608109  |
| ENSMUSG Slc39a11   | 5.176548 | 5.983505 | 4.943201 | 12.26276 | 9.688232 | 12.530603 |
| Mus_musc Mus_musc  | 0.035573 | 0        | 0.089414 | 0.073682 | 0.363293 | 0.130499  |
| Mus_musc Mus_musc  | 0.170583 | 0.274035 | 0.182798 | 0.370719 | 0.250636 | 0.223294  |
| Mus_musc Mus_musc  | 0        | 0.196415 | 0.112354 | 0.222349 | 0        | 0         |
| ENSMUSG Ccdc154    | 1.167482 | 0.918149 | 1.004144 | 0.887397 | 0.64342  | 0.970792  |
| Mus_musc Mus_musc  | 0        | 0.132943 | 0.339632 | 0.202133 | 0.25295  | 0.193396  |
| ENSMUSG Aar2       | 11.25522 | 9.946997 | 8.509739 | 8.527692 | 8.660521 | 9.493597  |
| ENSMUSG Epb41l1    | 10.25205 | 11.05966 | 7.885174 | 8.610354 | 8.806596 | 9.555974  |
| ENSMUSG Rbm39      | 127.5799 | 129.7344 | 118.3079 | 107.775  | 93.56541 | 100.84643 |
| Mus_musc Mus_musc  | 0        | 0        | 0        | 0        | 0        | 0         |
| ENSMUSG Zmym1      | 2.87417  | 3.859639 | 3.570232 | 3.089717 | 2.994637 | 2.658635  |
| ENSMUSG Chil5      | 0        | 0.05358  | 0.141476 | 0.064853 | 0.017863 | 0.278665  |
| Mus_musc Mus_musc  | 0        | 0.426092 | 0        | 0.419332 | 0.512958 | 0.302382  |
| ENSMUSG Olfr676    | 0        | 0        | 0        | 0        | 0        | 0         |
| ENSMUSG Cyp2a22    | 0        | 0.013833 | 0.023233 | 0        | 0        | 0         |
| Mus_musc Mus_musc  | 2.302888 | 2.015408 | 1.813783 | 0.987228 | 1.372943 | 0.944302  |
| ENSMUSG Ddi2       | 20.00163 | 22.57959 | 18.78215 | 17.99304 | 19.18288 | 18.986455 |
| ENSMUSG Milr1      | 1.864365 | 1.338907 | 2.82378  | 2.495598 | 2.075758 | 2.928357  |
| ENSMUSG 1700020N   | 0        | 0        | 0        | 0        | 0        | 0         |
| ENSMUSG Tsfm       | 9.922763 | 8.616193 | 8.236346 | 7.279574 | 7.420967 | 7.791381  |
| ENSMUSG Manea      | 7.732495 | 7.232925 | 6.944669 | 8.641938 | 9.345003 | 8.335908  |
| ENSMUSG Tlr8       | 4.629752 | 4.043788 | 4.119311 | 8.332252 | 10.5721  | 8.838504  |
| ENSMUSG Cblc       | 4.297247 | 3.721249 | 3.700433 | 3.908767 | 4.100154 | 4.587202  |
| ENSMUSG Zfp609     | 11.57376 | 12.30581 | 10.52983 | 9.680865 | 11.03805 | 10.298467 |
| ENSMUSG Pramef25   | 0        | 0        | 0        | 0        | 0        | 0         |
| ENSMUSG Gm13101    | 0        | 0        | 0        | 0        | 0        | 0         |
| ENSMUSG Zbtb21     | 5.842871 | 5.729522 | 5.174199 | 4.752479 | 4.786373 | 5.169229  |
| ENSMUSG Gpr156     | 0.055622 | 0.013701 | 0.049789 | 0        | 0        | 0         |
| Mus_musc Mus_musc  | 1.14659  | 0.680134 | 6.573688 | 4.746732 | 4.290433 | 4.906566  |
| Mus_musc Mus_musc  | 1.135078 | 1.939668 | 1.096682 | 1.699543 | 1.331027 | 1.625224  |
| Mus_musc Mus_musc  | 0.285869 | 0        | 0        | 0.461214 | 0        | 0         |
| Mus_musc Mus_musc  | 0        | 0        | 0        | 0        | 0        | 0         |
| Mus_musc Mus_musc  | 0.153599 | 0        | 0.317159 | 0        | 0        | 0.286544  |
| ENSMUSG Tbx19      | 0        | 0        | 0        | 0        | 0.041129 | 0         |

|                    |          |          |          |          |          |           |
|--------------------|----------|----------|----------|----------|----------|-----------|
| ENSMUSG Xcl1       | 0.220029 | 0        | 0.525866 | 1.172197 | 0.595416 | 1.146322  |
| ENSMUSG Dcaf6      | 14.77315 | 16.06026 | 14.38528 | 10.49417 | 12.54101 | 12.633506 |
| ENSMUSG Atp1b1     | 170.5217 | 184.6272 | 145.0179 | 143.0313 | 161.4305 | 152.87277 |
| ENSMUSG Blzf1      | 9.794623 | 9.410832 | 8.520254 | 7.676307 | 7.531401 | 7.917363  |
| ENSMUSG Dpt        | 42.86446 | 53.27617 | 41.84722 | 58.00946 | 54.40793 | 54.325645 |
| ENSMUSG Nme7       | 6.466263 | 5.261768 | 6.215169 | 7.076851 | 8.613227 | 6.879716  |
| ENSMUSG Ccdc181    | 8.39946  | 10.88511 | 6.539927 | 12.43764 | 12.92881 | 10.632197 |
| ENSMUSG F5         | 0.811496 | 0.729054 | 0.612877 | 2.81693  | 3.061679 | 4.00677   |
| ENSMUSG Gm28036    | 7.191519 | 1.242525 | 8.09855  | 0.336898 | 5.773502 | 7.15213   |
| ENSMUSG Lrrc10b    | 6.232287 | 5.391852 | 3.763039 | 6.956709 | 7.244541 | 6.626909  |
| ENSMUSG Tubb2b     | 6.819273 | 6.975777 | 9.889911 | 7.678483 | 7.219077 | 8.163552  |
| ENSMUSG Gm10256    | 0        | 0        | 0        | 0        | 0        | 0         |
| ENSMUSG Gm17361    | 0        | 0        | 0        | 0        | 0        | 0         |
| ENSMUSG Rps6ka1    | 24.69651 | 24.15047 | 26.16802 | 28.70681 | 28.94883 | 29.440018 |
| ENSMUSG Sphk2      | 14.15937 | 12.23251 | 12.50257 | 12.53579 | 11.99773 | 13.210043 |
| ENSMUSG Olfr104-ps | 0        | 0        | 0        | 0        | 0        | 0         |
| ENSMUSG Olfr948    | 0        | 0        | 0        | 0        | 0        | 0         |
| ENSMUSG Sik2       | 7.909027 | 8.041246 | 5.846581 | 7.497348 | 7.701041 | 7.760476  |
| ENSMUSG Gm1553     | 0        | 0        | 0        | 0        | 0        | 0         |
| ENSMUSG Vmn1r170   | 0        | 0        | 0        | 0        | 0        | 0         |
| ENSMUSG Olfr937    | 0        | 0        | 0        | 0        | 0        | 0         |
| ENSMUSG Nfatc2ip   | 4.482924 | 3.857553 | 4.098073 | 3.412224 | 3.323846 | 3.18632   |
| ENSMUSG Gm21739    | 0        | 0        | 0        | 0        | 0        | 0         |
| ENSMUSG Sox21      | 0.118442 | 0.271006 | 0.026681 | 0.425765 | 0.455109 | 0.221809  |
| ENSMUSG Setd7      | 16.0712  | 17.42838 | 15.26613 | 14.54052 | 15.48806 | 14.569092 |
| ENSMUSG Gm28043    | 0.79037  | 0.671261 | 2.066666 | 0.9046   | 0.774721 | 0.677894  |
| ENSMUSG Cd19       | 3.178891 | 1.985106 | 2.320043 | 7.300034 | 6.174779 | 7.566746  |
| ENSMUSG Cox5b      | 49.81359 | 56.53308 | 48.93466 | 61.16615 | 59.11542 | 61.777909 |
| Mus_musc Mus_musc  | 4.605845 | 1.407623 | 12.2741  | 12.46501 | 2.312053 | 3.366715  |
| Mus_musc Mus_musc  | 0        | 0        | 0        | 0        | 0        | 0         |
| ENSMUSG S100a6     | 156.2183 | 140.3374 | 166.7353 | 113.4233 | 105.8367 | 127.27541 |
| Mus_musc Mus_musc  | 0.142024 | 0.042476 | 0.259694 | 0        | 0        | 0.06711   |
| Mus_musc Mus_musc  | 0.15121  | 0.463377 | 0.096899 | 0.40913  | 0        | 0.122293  |
| Mus_musc Mus_musc  | 0        | 0.308619 | 0        | 0        | 0        | 0         |
| Mus_musc Mus_musc  | 0.706903 | 0.074442 | 0.21717  | 0.10671  | 0.087963 | 0.258793  |
| Mus_musc Mus_musc  | 0.094016 | 0.121702 | 0.082505 | 0.131161 | 0.137428 | 0.121348  |
| Mus_musc Mus_musc  | 0.323435 | 0.356843 | 0.200061 | 1.060386 | 0.892185 | 0.893712  |
| Mus_musc Mus_musc  | 0        | 0        | 0.403729 | 0.346558 | 0.079423 | 0         |
| Mus_musc Mus_musc  | 0        | 0.120599 | 0.120333 | 0.118657 | 0.357563 | 0.5203    |
| Mus_musc Mus_musc  | 0        | 0.312154 | 0        | 0.55119  | 0.695013 | 0.637568  |
| ENSMUSG Olfr1287   | 0        | 0        | 0        | 0        | 0        | 0         |
| ENSMUSG Sdf2       | 27.18095 | 31.29156 | 36.45347 | 36.62224 | 31.53366 | 37.992809 |
| ENSMUSG Ccne1      | 0.528201 | 0.380527 | 0.191658 | 1.316258 | 2.009823 | 2.18769   |
| ENSMUSG Calhm6     | 0.665844 | 0.590579 | 2.76243  | 2.486172 | 1.474426 | 1.693874  |
| ENSMUSG Snx12      | 15.98384 | 16.07651 | 16.8501  | 17.08579 | 16.02009 | 16.849117 |
| ENSMUSG Otulin     | 11.04196 | 11.06595 | 12.07887 | 10.51899 | 10.69443 | 9.990591  |
| ENSMUSG Olfr465-ps | 0        | 0        | 0        | 0        | 0        | 0         |
| ENSMUSG Gm7954     | 0        | 0        | 0        | 0        | 0        | 0         |
| ENSMUSG Lrit3      | 0        | 0        | 0        | 0.042512 | 0.066893 | 0         |
| ENSMUSG Olfr802    | 0        | 0        | 0        | 0        | 0        | 0         |
| ENSMUSG Hsd3b4     | 0        | 0.019137 | 0.084347 | 0.01297  | 0        | 0         |
| ENSMUSG Olfr926    | 0        | 0        | 0        | 0        | 0        | 0         |
| ENSMUSG Pde6h      | 0.0088   | 0        | 0        | 0        | 0        | 0         |
| ENSMUSG Olfr764-ps | 0        | 0        | 0        | 0        | 0        | 0         |
| Mus_musc Mus_musc  | 0        | 0        | 0.146526 | 0        | 0        | 0         |
| Mus_musc Mus_musc  | 0.115656 | 0.147743 | 0.119976 | 0.328751 | 0.222273 | 0.336352  |
| Mus_musc Mus_musc  | 0.036197 | 0        | 0.087292 | 0.219151 | 0.115761 | 0.12503   |
| ENSMUSG Pex26      | 4.547808 | 4.494443 | 4.759313 | 3.340345 | 3.540623 | 3.65703   |
| ENSMUSG Gm7145     | 0        | 0        | 0        | 0        | 0        | 0         |
| Mus_musc Mus_musc  | 0        | 0.209154 | 0.050379 | 0.417328 | 0.153021 | 0.201947  |
| Mus_musc Mus_musc  | 0        | 0        | 0        | 0        | 0        | 0         |
| ENSMUSG Zfp870     | 2.066007 | 2.08256  | 2.01127  | 1.80111  | 1.846435 | 1.657764  |
| ENSMUSG Gm20825    | 0        | 0        | 0        | 0        | 0        | 0         |
| Mus_musc Mus_musc  | 0.149035 | 0        | 0        | 0        | 0        | 0.434559  |

|                   |          |          |          |          |          |           |
|-------------------|----------|----------|----------|----------|----------|-----------|
| Mus_musc Mus_musc | 0.23577  | 0        | 0        | 0        | 0.131555 | 0         |
| ENSMUSG Olfr763   | 0        | 0        | 0        | 0        | 0        | 0         |
| ENSMUSG Gm35315   | 0.098152 | 0.123435 | 0.127026 | 0.278534 | 0.311437 | 0.26977   |
| ENSMUSG Prkd1     | 7.536442 | 7.201502 | 6.32114  | 3.818772 | 4.06673  | 4.176813  |
| ENSMUSG Gm48551   | 1.301652 | 1.017137 | 0.671298 | 0.662073 | 0.586176 | 0.751919  |
| ENSMUSG Gm47969   | 0.055576 | 0.060203 | 0.155787 | 0.07715  | 0.078907 | 0         |
| ENSMUSG Pkp3      | 6.83348  | 5.761914 | 6.406658 | 6.540942 | 5.461969 | 5.606505  |
| ENSMUSG Zfp988    | 0        | 0        | 0        | 0        | 0        | 0         |
| ENSMUSG Cfap74    | 0.900537 | 1.001065 | 0.75534  | 1.610035 | 1.226779 | 1.070395  |
| ENSMUSG Gm13090   | 0        | 0        | 0        | 0        | 0        | 0         |
| ENSMUSG 6030452D  | 0        | 0        | 0        | 0        | 0        | 0         |
| ENSMUSG Zfp978    | 0        | 0.22423  | 0.206923 | 0        | 0.281756 | 0.267522  |
| ENSMUSG Zfp984    | 8.545074 | 7.894001 | 7.431065 | 7.712222 | 8.064076 | 6.462023  |
| ENSMUSG Olfr1298  | 0        | 0        | 0        | 0        | 0        | 0         |
| ENSMUSG Gm4307    | 0        | 0        | 0        | 0        | 0        | 0         |
| ENSMUSG Gm4756    | 0        | 0.046604 | 0.037154 | 0        | 0        | 0.045889  |
| ENSMUSG Tm9sf2    | 69.03246 | 65.32017 | 64.83922 | 59.14837 | 60.25216 | 58.279041 |
| ENSMUSG Lbhd1     | 2.123808 | 1.963844 | 2.049601 | 1.882377 | 2.135692 | 2.322446  |
| ENSMUSG Grk1      | 0.007591 | 0        | 0        | 0        | 0        | 0.006965  |
| ENSMUSG Tal1      | 7.651805 | 5.79601  | 6.570158 | 3.952289 | 4.267475 | 3.454809  |
| ENSMUSG Ddx17     | 112.0619 | 113.9547 | 111.2482 | 103.1332 | 93.56803 | 103.24068 |
| ENSMUSG Luzp1     | 21.27259 | 22.9957  | 18.86792 | 15.21899 | 16.36233 | 14.555474 |
| ENSMUSG Nodal     | 0.087329 | 0        | 0.016531 | 0.022686 | 0        | 0.066817  |
| ENSMUSG E330009J0 | 7.006199 | 6.988649 | 5.983096 | 7.092216 | 7.613753 | 7.464474  |
| ENSMUSG Mfsd10    | 15.6541  | 12.92288 | 16.25716 | 12.54602 | 14.07553 | 12.60711  |
| ENSMUSG Elf2      | 29.09705 | 21.72649 | 23.6684  | 20.27872 | 25.85079 | 21.214556 |
| ENSMUSG Hoxd4     | 0.024932 | 0.047197 | 0.096214 | 0.132212 | 0.193525 | 0.094971  |
| ENSMUSG Gm28040   | 0        | 0        | 0.149009 | 0.041227 | 0        | 0         |
| ENSMUSG Abhd15    | 2.014964 | 1.677465 | 1.853673 | 1.458994 | 1.418969 | 1.651088  |
| ENSMUSG Zfp617    | 7.827205 | 6.966154 | 7.652055 | 7.19375  | 6.939617 | 5.895537  |
| ENSMUSG Ttll2     | 0        | 0        | 0        | 0        | 0        | 0         |
| ENSMUSG Gata3     | 4.655284 | 2.877376 | 4.45797  | 3.179624 | 2.758285 | 2.77007   |
| ENSMUSG Wfdc1     | 20.9285  | 30.21256 | 20.54681 | 20.44063 | 19.70766 | 20.66514  |
| ENSMUSG Gcm1      | 0        | 0        | 0        | 0        | 0        | 0         |
| ENSMUSG Mrgpra4   | 0        | 0        | 0        | 0        | 0        | 0         |
| ENSMUSG Dtwd1     | 3.722857 | 3.836592 | 3.599695 | 3.128123 | 3.50048  | 3.131733  |
| ENSMUSG Rft1      | 5.738819 | 6.09377  | 5.520751 | 6.061601 | 5.542321 | 5.85023   |
| ENSMUSG Zfp174    | 0.705062 | 0.593791 | 0.581551 | 0.627337 | 0.585214 | 0.676588  |
| ENSMUSG Olfr1346  | 0        | 0        | 0        | 0        | 0        | 0         |
| ENSMUSG Afp       | 0.237523 | 0.547749 | 0.281369 | 0.458701 | 0.480803 | 0.577602  |
| ENSMUSG Zkscan4   | 1.755195 | 2.212666 | 1.718855 | 1.838263 | 1.719331 | 1.348243  |
| ENSMUSG Ezr       | 93.14659 | 101.2228 | 88.4193  | 85.75232 | 81.81715 | 97.448723 |
| ENSMUSG Kcnmb4    | 2.653348 | 2.034693 | 2.024639 | 1.880953 | 2.187318 | 2.953448  |
| ENSMUSG Gm9639    | 0        | 0        | 0        | 0        | 0        | 0         |
| ENSMUSG Rap1gap   | 13.10936 | 12.71006 | 11.50212 | 8.983922 | 9.13678  | 8.589591  |
| ENSMUSG Tmem29    | 4.228274 | 4.195665 | 4.30352  | 5.439503 | 5.275047 | 5.029234  |
| ENSMUSG Ssr2      | 75.10164 | 77.92085 | 82.71174 | 85.51825 | 88.64978 | 90.187005 |
| ENSMUSG Rgl2      | 24.84579 | 23.0687  | 27.81462 | 23.87046 | 21.389   | 21.743655 |
| ENSMUSG Rnf128    | 1.884376 | 2.734455 | 1.475361 | 10.11749 | 11.41613 | 12.209333 |
| ENSMUSG Tcl1      | 0        | 0        | 0        | 0        | 0        | 0         |
| ENSMUSG Nutm1     | 0        | 0        | 0        | 0        | 0        | 0         |
| ENSMUSG Mcts1     | 12.43577 | 13.74634 | 13.40896 | 12.78252 | 14.35576 | 11.601028 |
| ENSMUSG Gm6871    | 0        | 0        | 0        | 0        | 0        | 0         |
| ENSMUSG Prps1     | 15.55365 | 14.30675 | 14.85955 | 14.44715 | 16.0972  | 14.729277 |
| ENSMUSG Tsc22d3   | 177.5383 | 233.2531 | 226.8679 | 75.82335 | 137.477  | 95.344423 |
| ENSMUSG Esp8      | 0        | 0        | 0        | 0        | 0        | 0         |
| Mus_musc Mus_musc | 3.833073 | 3.235376 | 2.364489 | 1.401316 | 1.605136 | 1.851467  |
| Mus_musc Mus_musc | 1.818112 | 2.279219 | 1.747951 | 1.02259  | 0.849502 | 0.586084  |
| Mus_musc Mus_musc | 0.024899 | 0.092961 | 0.015665 | 0.053776 | 0.034836 | 0         |
| Mus_musc Mus_musc | 0.046198 | 1.70E-05 | 3.10E-05 | 0.023178 | 0.001512 | 0         |
| ENSMUSG Olfr1386  | 0        | 0        | 0        | 0        | 0        | 0         |
| ENSMUSG Gm4707    | 0        | 0        | 0.017138 | 0        | 0        | 0.312316  |
| ENSMUSG Gm39653   | 0        | 0        | 0        | 0        | 0        | 0         |
| ENSMUSG Muc3a     | 0        | 0        | 0        | 0.132848 | 0        | 0.029082  |



|                   |          |          |          |          |          |           |
|-------------------|----------|----------|----------|----------|----------|-----------|
| ENSMUSG Olfr1487  | 0        | 0        | 0        | 0        | 0        | 0         |
| ENSMUSG Tmem95    | 0.222026 | 0.091249 | 0        | 0.429633 | 0.179309 | 0.393347  |
| ENSMUSG Pibf1     | 3.733985 | 3.741462 | 3.2238   | 3.308142 | 4.124019 | 3.606349  |
| ENSMUSG Entpd4b   | 6.808155 | 7.881218 | 6.414516 | 7.103485 | 6.659689 | 6.933289  |
| ENSMUSG Nkx3-1    | 0        | 0        | 0        | 0        | 0        | 0         |
| ENSMUSG Cln6      | 10.53243 | 9.78999  | 8.630243 | 11.4828  | 10.60501 | 11.024621 |
| ENSMUSG Arid3c    | 0        | 0        | 0.014472 | 0        | 0        | 0.051963  |
| ENSMUSG Fem1b     | 13.80353 | 15.62433 | 13.70773 | 12.9109  | 13.81171 | 13.687793 |
| ENSMUSG Gdf5      | 0.407104 | 0.449761 | 0.425544 | 0.545686 | 0.494171 | 1.122345  |
| ENSMUSG Olfr920   | 0.22675  | 0.228884 | 0.33666  | 0.31936  | 0.171491 | 0.204117  |
| ENSMUSG Usp38     | 8.365701 | 8.427328 | 8.240725 | 8.359836 | 8.266104 | 8.488669  |
| ENSMUSG Ncapd2    | 1.845422 | 1.913202 | 1.922475 | 3.364569 | 4.289871 | 4.503136  |
| ENSMUSG Hoxa5     | 21.49238 | 12.76032 | 15.56931 | 9.5606   | 13.40356 | 10.844713 |
| ENSMUSG Neurod2   | 0        | 0        | 0        | 0        | 0        | 0         |
| ENSMUSG Bcl9      | 5.401266 | 5.310473 | 4.994059 | 5.666351 | 5.179521 | 5.415915  |
| ENSMUSG Glra3     | 0        | 0        | 0        | 0.007193 | 0.016122 | 0.007924  |
| ENSMUSG Rps6kb1   | 7.851855 | 8.485687 | 7.748672 | 8.044104 | 7.773982 | 6.782778  |
| ENSMUSG Mrpl22    | 11.86369 | 14.08628 | 12.22646 | 11.80635 | 12.15776 | 11.920193 |
| ENSMUSG Cnot8     | 28.2828  | 29.30554 | 29.47697 | 29.1034  | 27.303   | 30.156182 |
| ENSMUSG Tubd1     | 4.277564 | 3.584155 | 3.114188 | 3.390353 | 3.130228 | 3.008069  |
| ENSMUSG Klfh4     | 0.798316 | 1.136843 | 0.567968 | 0.856108 | 0.646373 | 0.705037  |
| ENSMUSG Tma16     | 1.709963 | 1.378864 | 1.516217 | 1.558336 | 1.555701 | 1.650952  |
| ENSMUSG Dach2     | 0        | 0.068218 | 0.031723 | 0.02183  | 0.021729 | 0         |
| ENSMUSG Vps72     | 20.01883 | 21.17593 | 22.21992 | 18.71785 | 18.98896 | 19.993063 |
| ENSMUSG Snx31     | 0.161528 | 0.220602 | 0.125045 | 0        | 0        | 0         |
| ENSMUSG Trpc5os   | 0        | 0        | 0.042411 | 0        | 0        | 0         |
| ENSMUSG Gm15080   | 0        | 0        | 0        | 0        | 0        | 0         |
| ENSMUSG Gm15107   | 0        | 0        | 0        | 0        | 0        | 0         |
| ENSMUSG Akr7a5    | 11.9589  | 12.96841 | 12.12814 | 12.32509 | 13.62166 | 14.616708 |
| ENSMUSG Mrto4     | 10.81098 | 7.698603 | 10.17002 | 8.107102 | 8.394951 | 9.630439  |
| ENSMUSG Htr6      | 0.072289 | 0        | 0        | 0        | 0        | 0         |
| ENSMUSG Capzb     | 115.9575 | 113.278  | 129.3894 | 112.5409 | 113.9038 | 122.10279 |
| ENSMUSG Pqlc2     | 4.097683 | 3.560608 | 3.620701 | 3.722355 | 4.061534 | 4.786317  |
| ENSMUSG Pla2g2f   | 0.037225 | 0.037372 | 0        | 0.063535 | 0.044079 | 0.030636  |
| ENSMUSG Slc18a2   | 0.463379 | 0.728171 | 0.938278 | 0.662936 | 0.583444 | 0.699113  |
| ENSMUSG Olfr901   | 0        | 0        | 0        | 0        | 0        | 0         |
| Mus_musc Mus_musc | 0.260905 | 0        | 0.204502 | 0        | 0.13399  | 0         |
| Mus_musc Mus_musc | 0.660278 | 2.529695 | 0.950103 | 1.432812 | 0.999064 | 1.089888  |
| ENSMUSG Zfp217    | 9.031645 | 9.788811 | 9.412534 | 10.09466 | 9.65004  | 9.339642  |
| Mus_musc Mus_musc | 0.330296 | 0.098451 | 0.04045  | 0.06135  | 0.241007 | 0         |
| ENSMUSG Fam213b   | 7.782968 | 7.438737 | 5.858827 | 6.992277 | 5.826218 | 6.060937  |
| ENSMUSG Arap2     | 16.12208 | 17.78563 | 17.87071 | 11.84473 | 10.90258 | 10.346472 |
| ENSMUSG Rara      | 20.60964 | 18.39945 | 20.56764 | 13.98032 | 12.77703 | 12.684107 |
| ENSMUSG Dhx38     | 15.26908 | 15.01246 | 16.08037 | 14.65001 | 13.77376 | 14.154198 |
| ENSMUSG Sh3rf3    | 2.805388 | 3.235416 | 2.710358 | 2.436397 | 2.194365 | 2.70915   |
| ENSMUSG Rmi2      | 0.110714 | 0.099629 | 0.129885 | 0.259443 | 0.459297 | 0.222185  |
| ENSMUSG Slc24a2   | 0.113612 | 0.089793 | 0.046248 | 0.039063 | 0.026379 | 0.089198  |
| ENSMUSG Parp11    | 4.752029 | 4.720526 | 8.410521 | 7.028693 | 5.118843 | 5.492288  |
| ENSMUSG Slc9b2    | 0.014089 | 0.124179 | 0.041058 | 0.042403 | 0.118633 | 0.033488  |
| ENSMUSG Igsf9     | 0.383142 | 0.450561 | 0.349737 | 0.599394 | 0.591355 | 0.552423  |
| ENSMUSG Krt222    | 0.079387 | 0.25735  | 0.084417 | 0.657083 | 0.420568 | 0.625872  |
| ENSMUSG Ddx11     | 1.028029 | 0.896303 | 1.248096 | 1.28328  | 1.436701 | 1.464256  |
| ENSMUSG Gm13889   | 18.52046 | 12.61193 | 14.84063 | 17.21365 | 15.20349 | 12.861138 |
| ENSMUSG Lysmd3    | 9.337644 | 10.11875 | 10.62525 | 9.143617 | 8.665359 | 8.543194  |
| ENSMUSG Ids       | 39.84398 | 41.25089 | 38.35212 | 30.81925 | 30.72255 | 30.550945 |
| ENSMUSG Alg12     | 4.826362 | 6.020577 | 6.749278 | 6.907155 | 6.213162 | 7.134277  |
| ENSMUSG Pdccd11   | 7.702616 | 6.582682 | 7.500109 | 6.282597 | 5.934946 | 5.949268  |
| ENSMUSG Msr1      | 1.161308 | 1.246316 | 1.818748 | 6.458625 | 7.873482 | 8.861408  |
| ENSMUSG Dusp21    | 0        | 0        | 0        | 0        | 0        | 0         |
| ENSMUSG Nt5c2     | 9.787772 | 9.031063 | 9.042373 | 7.910148 | 7.0787   | 8.174514  |
| ENSMUSG Fundc1    | 17.73012 | 18.3924  | 17.04074 | 18.05925 | 16.99446 | 16.489845 |
| ENSMUSG Taf5      | 2.216511 | 2.136828 | 2.248016 | 1.687868 | 1.625659 | 1.550057  |
| ENSMUSG Cdc123    | 19.62296 | 20.99856 | 21.6527  | 20.44444 | 19.40209 | 21.697073 |
| ENSMUSG Isl2      | 0        | 0        | 0        | 0.075933 | 0        | 0         |

|                   |          |          |          |          |          |           |
|-------------------|----------|----------|----------|----------|----------|-----------|
| ENSMUSG Clk3      | 24.16766 | 22.67096 | 25.86754 | 21.179   | 19.71465 | 21.455079 |
| ENSMUSG Cyp1a1    | 17.18741 | 16.24124 | 27.30404 | 20.22398 | 21.82221 | 52.862152 |
| ENSMUSG Etfa      | 37.64127 | 44.32348 | 40.66185 | 47.35643 | 43.80104 | 44.313911 |
| ENSMUSG Tmem266   | 0        | 0.032525 | 0.011092 | 0.010125 | 0        | 0.031347  |
| ENSMUSG Csk       | 30.92009 | 28.48718 | 33.91026 | 36.59013 | 35.22488 | 38.318524 |
| ENSMUSG Nrg4      | 1.363476 | 1.485793 | 0.881601 | 0.946849 | 1.671527 | 1.562968  |
| ENSMUSG Cyp1a2    | 0        | 0        | 0        | 0.040365 | 0        | 0         |
| ENSMUSG Mucl1     | 0.058543 | 0.238589 | 0        | 2.592565 | 2.842009 | 3.604715  |
| ENSMUSG Zfp941    | 0.042141 | 0.042033 | 0.151169 | 0.076638 | 0.081853 | 0.27352   |
| ENSMUSG Acnat2    | 0        | 0        | 0        | 0        | 0        | 0         |
| ENSMUSG Pdhub     | 37.77607 | 43.28854 | 42.10912 | 40.7896  | 40.8175  | 41.64352  |
| ENSMUSG Oit1      | 0        | 0.502275 | 0.028044 | 2.844532 | 2.238222 | 1.829735  |
| ENSMUSG Ptprg     | 26.61738 | 26.02331 | 21.89853 | 18.81754 | 22.44518 | 19.826241 |
| ENSMUSG 4930452B( | 0.650781 | 0.697989 | 0.568182 | 0.702783 | 0.718846 | 0.708234  |
| Mus_musc Mus_musc | 0.168158 | 0.489719 | 0.468056 | 0.343495 | 0.530732 | 0.526353  |
| ENSMUSG Fezf2     | 0        | 0        | 0        | 0        | 0        | 0         |
| ENSMUSG Olfr873   | 0        | 0        | 0        | 0        | 0        | 0         |
| Mus_musc Mus_musc | 0.188043 | 0        | 0.129148 | 0        | 0        | 0         |
| ENSMUSG Gm37419   | 0.091641 | 0.077752 | 0        | 0.101344 | 0.130718 | 0         |
| ENSMUSG Prss32    | 0        | 0        | 0        | 0.319699 | 0.429426 | 0.426605  |
| ENSMUSG H2a3      | 0        | 0        | 0        | 0        | 0        | 0         |
| ENSMUSG Olfr1366  | 0        | 0.008677 | 0.048084 | 0.041603 | 0        | 0         |
| ENSMUSG Krcc1     | 37.88555 | 37.25508 | 41.10792 | 37.06864 | 35.47329 | 32.989469 |
| ENSMUSG Psmf1     | 7.876464 | 7.231424 | 7.562254 | 7.6216   | 6.797753 | 7.069879  |
| ENSMUSG Rag2      | 0        | 0        | 0        | 0        | 0        | 0         |
| ENSMUSG Fbxw8     | 27.69833 | 26.92926 | 24.65888 | 18.35319 | 19.29105 | 18.190474 |
| ENSMUSG P2ry2     | 4.907938 | 4.360916 | 4.375344 | 8.652231 | 7.871829 | 10.420341 |
| ENSMUSG Tmem256   | 21.55191 | 29.46397 | 27.06484 | 28.20514 | 27.94387 | 33.081923 |
| ENSMUSG Nlrp1b    | 0.794774 | 0.607734 | 0.992737 | 1.033907 | 1.136734 | 1.056047  |
| ENSMUSG Krt73     | 0        | 0        | 0        | 0        | 0        | 0         |
| ENSMUSG Olfr98    | 0.03188  | 0.119002 | 0.022675 | 0.1124   | 0        | 0.077679  |
| ENSMUSG Brwd3     | 2.662452 | 3.090289 | 2.117263 | 2.674298 | 2.809905 | 2.556787  |
| ENSMUSG Lpcat2    | 2.732409 | 2.633935 | 3.411631 | 5.596251 | 5.367156 | 5.225333  |
| ENSMUSG Snx4      | 31.72818 | 27.97787 | 30.24892 | 26.58225 | 24.93749 | 28.098892 |
| ENSMUSG Tie1      | 81.95954 | 74.63112 | 74.39976 | 51.49018 | 56.25441 | 48.346608 |
| ENSMUSG Osbp11    | 10.36491 | 10.20589 | 9.894152 | 9.705509 | 10.5686  | 10.473399 |
| ENSMUSG Maats1    | 1.694735 | 2.35158  | 1.256645 | 2.793283 | 2.755137 | 2.872754  |
| ENSMUSG Lmln      | 1.022381 | 1.479858 | 1.010127 | 1.033608 | 1.276733 | 1.368663  |
| ENSMUSG Popdc2    | 4.07714  | 5.399132 | 3.874969 | 2.608073 | 2.671751 | 1.938074  |
| ENSMUSG Fytd1     | 12.38035 | 13.49499 | 10.54665 | 11.48254 | 10.48146 | 10.250897 |
| ENSMUSG Lrch3     | 14.30657 | 12.83867 | 12.29849 | 9.986523 | 9.10682  | 10.303937 |
| ENSMUSG Fmod      | 5.749362 | 4.880278 | 5.060723 | 4.898833 | 4.220564 | 4.427377  |
| ENSMUSG Zfp523    | 11.48644 | 13.26973 | 10.95525 | 10.60303 | 9.693945 | 9.809182  |
| ENSMUSG Ugt1a6a   | 15.74021 | 15.07897 | 12.01203 | 11.46232 | 11.59059 | 11.990922 |
| Mus_musc Mus_musc | 0.796439 | 0.571713 | 0.588165 | 0.416439 | 0.412618 | 0.470833  |
| ENSMUSG Tmco5     | 0        | 0        | 0        | 0        | 0        | 0         |
| ENSMUSG F2r       | 122.9233 | 107.3472 | 118.3587 | 64.22599 | 76.62996 | 68.265633 |
| ENSMUSG Fermt1    | 0.372199 | 0.705678 | 0.17777  | 0.779072 | 0.879087 | 0.901332  |
| ENSMUSG Sox13     | 41.42033 | 34.598   | 39.35945 | 20.62513 | 21.60294 | 20.481767 |
| ENSMUSG Pdp2      | 2.225953 | 2.475428 | 2.437198 | 2.972246 | 2.458881 | 2.382351  |
| ENSMUSG Mcm8      | 0.882547 | 1.015809 | 0.612376 | 0.981669 | 0.951949 | 1.392956  |
| ENSMUSG Fgfbp1    | 28.80339 | 32.67965 | 26.32498 | 14.4242  | 12.05734 | 14.203286 |
| ENSMUSG Slc27a2   | 0.384053 | 0.561843 | 0.314483 | 0.472998 | 0.430071 | 0.740406  |
| ENSMUSG Socs4     | 10.37156 | 10.43983 | 9.336591 | 9.403908 | 8.635139 | 8.25501   |
| ENSMUSG Sf3b3     | 18.77887 | 19.87245 | 19.26426 | 17.63297 | 16.89281 | 18.561863 |
| ENSMUSG Egr3      | 1.259896 | 0.359749 | 0.893468 | 0.950802 | 0.488071 | 0.665585  |
| ENSMUSG Fndc3c1   | 0.023218 | 0.036299 | 0        | 0.024496 | 0.086449 | 0         |
| ENSMUSG Spr       | 30.82228 | 30.04126 | 29.57831 | 20.85762 | 25.62641 | 23.15639  |
| ENSMUSG Fkbp1     | 3.670237 | 2.685821 | 2.966446 | 2.325991 | 2.446706 | 2.442889  |
| ENSMUSG Lira6     | 4.831732 | 3.212126 | 6.259322 | 6.157645 | 7.296146 | 7.785443  |
| ENSMUSG Fer115    | 0.508271 | 0.58256  | 0.532293 | 0.560274 | 0.555807 | 0.347848  |
| ENSMUSG Pop4      | 4.288688 | 3.395907 | 4.134184 | 3.793335 | 3.173569 | 2.826034  |
| ENSMUSG Slc30a1   | 20.71197 | 17.63133 | 17.57741 | 11.59942 | 12.15291 | 11.43904  |
| ENSMUSG Uri1      | 14.01356 | 13.02121 | 11.83407 | 13.15246 | 11.50289 | 11.533977 |

|                   |          |          |          |          |          |           |
|-------------------|----------|----------|----------|----------|----------|-----------|
| ENSMUSG Ttyh1     | 0.118691 | 0.245321 | 0.12165  | 0.122551 | 0.268314 | 0.298082  |
| ENSMUSG Ndst4     | 0.433256 | 0.309388 | 0.348236 | 0.242712 | 0.241187 | 0.195287  |
| ENSMUSG 1700006A  | 0        | 0        | 0        | 0        | 0        | 0         |
| ENSMUSG Ndst3     | 0.026703 | 0.05646  | 0.113281 | 0.082603 | 0.016323 | 0.022916  |
| ENSMUSG Prss12    | 6.091258 | 5.208204 | 4.234668 | 3.418194 | 4.043805 | 4.145217  |
| ENSMUSG Fam192a   | 12.1186  | 12.55666 | 14.13413 | 11.62523 | 12.54484 | 15.338894 |
| ENSMUSG Pllp      | 28.4118  | 33.86827 | 35.40924 | 24.84684 | 22.2396  | 20.507801 |
| ENSMUSG Arl2bp    | 54.97742 | 51.1511  | 53.99268 | 38.06487 | 40.75785 | 37.409841 |
| ENSMUSG Herpod1   | 93.08514 | 101.4896 | 83.76627 | 73.86605 | 91.02351 | 82.352263 |
| ENSMUSG Cntnap4   | 0        | 0        | 0        | 0        | 0        | 0         |
| ENSMUSG Cx3cl1    | 22.5044  | 16.48982 | 17.03377 | 12.46084 | 13.01522 | 10.018563 |
| ENSMUSG Ccl22     | 1.641287 | 0.796197 | 0.676736 | 5.418806 | 5.301608 | 6.269397  |
| ENSMUSG Rpl35a    | 15.71359 | 14.76708 | 21.33238 | 22.01328 | 14.39702 | 18.37339  |
| ENSMUSG Mospd1    | 9.099576 | 8.192938 | 7.78899  | 8.689572 | 9.291473 | 9.84532   |
| ENSMUSG Akirin1   | 19.86656 | 16.44526 | 18.85862 | 18.18851 | 23.07761 | 21.590855 |
| ENSMUSG Hist1h2ai | 0        | 0.076566 | 0        | 0.055349 | 0.182417 | 0.236208  |
| ENSMUSG Cyp4f18   | 4.966257 | 3.24048  | 4.890067 | 17.32015 | 19.67098 | 23.191648 |
| ENSMUSG Olfr172   | 0        | 0        | 0        | 0        | 0        | 0.011913  |
| ENSMUSG Cep89     | 3.975892 | 3.772685 | 3.629572 | 4.004032 | 3.589409 | 3.634195  |
| ENSMUSG Slc10a2   | 0        | 0.022373 | 0        | 0.03596  | 0        | 0         |
| ENSMUSG Acadl     | 59.92253 | 58.76408 | 48.46234 | 45.20646 | 51.41884 | 48.032955 |
| ENSMUSG Lancl1    | 8.398823 | 8.172902 | 8.005234 | 7.159961 | 7.291802 | 7.566145  |
| ENSMUSG Cxcl13    | 6.210269 | 14.56438 | 4.761796 | 9.191835 | 15.04797 | 13.25292  |
| ENSMUSG Gtf2ird1  | 7.47229  | 6.561724 | 6.702331 | 5.749535 | 5.766026 | 5.263659  |
| ENSMUSG Kansl1l   | 7.873196 | 7.936616 | 6.335877 | 5.170738 | 5.748463 | 5.54216   |
| ENSMUSG Rpe       | 13.35179 | 14.66273 | 13.84203 | 13.90474 | 14.62999 | 13.59126  |
| ENSMUSG Gal3st2c  | 0.026103 | 0.006497 | 0        | 0.007327 | 0        | 0.014633  |
| ENSMUSG D2hgdh    | 2.721972 | 2.675125 | 2.291813 | 2.992304 | 2.465809 | 3.599762  |
| ENSMUSG Serpinb3b | 0        | 0        | 0        | 0        | 0        | 0         |
| ENSMUSG Prob1     | 6.942663 | 6.544492 | 4.636839 | 4.78613  | 5.840599 | 5.323929  |
| ENSMUSG Serpinb3c | 0        | 0        | 0        | 0        | 0        | 0         |
| ENSMUSG Vav2      | 11.92712 | 11.64225 | 12.03597 | 13.41739 | 13.54955 | 15.394938 |
| ENSMUSG Tex15     | 1.142689 | 1.254607 | 1.047089 | 1.131266 | 1.030277 | 1.195348  |
| ENSMUSG Ap5b1     | 4.21552  | 2.762396 | 3.073305 | 4.157309 | 4.091714 | 3.724179  |
| ENSMUSG Defb20    | 0        | 0        | 0        | 0        | 0        | 0         |
| ENSMUSG Olfr95    | 0        | 0        | 0        | 0        | 0        | 0         |
| ENSMUSG Aknad1    | 0        | 0.021993 | 0        | 0        | 0        | 0         |
| Mus_musc Mus_musc | 0        | 0        | 0        | 0.229311 | 0.214609 | 0         |
| Mus_musc Mus_musc | 0        | 0        | 0        | 0        | 0        | 0         |
| Mus_musc Mus_musc | 0        | 0        | 0        | 0.174016 | 0        | 0         |
| Mus_musc Mus_musc | 0.417893 | 0.56661  | 0        | 0        | 0.40978  | 0.603007  |
| Mus_musc Mus_musc | 0.09082  | 0.331537 | 0.056493 | 0.146525 | 0.022756 | 0.140466  |
| ENSMUSG Fam25c    | 0.069129 | 0.063917 | 0        | 0        | 0.116683 | 0.284405  |
| ENSMUSG Fem1a     | 10.28431 | 9.019116 | 8.815556 | 8.758608 | 9.60229  | 9.663589  |
| ENSMUSG 1190005I0 | 0.287373 | 0.43009  | 0.520621 | 0.233359 | 0.368297 | 0.384828  |
| ENSMUSG Npas4     | 0.121421 | 0.149601 | 0.24776  | 0.081301 | 0.129209 | 0.092743  |
| ENSMUSG Irak4     | 7.090109 | 5.791809 | 7.356119 | 8.861927 | 7.932239 | 7.830129  |
| ENSMUSG Ppp2r1a   | 72.44637 | 68.13718 | 71.33129 | 59.9343  | 61.43487 | 62.33604  |
| ENSMUSG Nfib      | 21.86333 | 21.52432 | 19.07282 | 14.80364 | 15.39125 | 13.535172 |
| ENSMUSG Acot11    | 2.521011 | 2.168102 | 2.00494  | 1.988814 | 2.057444 | 2.38268   |
| ENSMUSG Tmem127   | 22.48492 | 22.25822 | 20.50034 | 20.27969 | 20.14162 | 22.135159 |
| ENSMUSG Mfsd12    | 11.15334 | 10.28035 | 11.64651 | 24.35869 | 25.9444  | 29.218836 |
| ENSMUSG Cxcl10    | 2.075812 | 0.776474 | 2.700342 | 3.326091 | 2.118737 | 3.815515  |
| ENSMUSG Fam214a   | 7.408849 | 5.757392 | 5.036991 | 8.33913  | 8.761139 | 7.162897  |
| ENSMUSG Vmn1r225  | 0        | 0        | 0        | 0        | 0        | 0         |
| ENSMUSG Setx      | 8.665113 | 8.67927  | 8.003531 | 8.341271 | 8.875619 | 8.568086  |
| Mus_musc Mus_musc | 0.144265 | 0.060083 | 0        | 0        | 0.126607 | 0         |
| Mus_musc Mus_musc | 0        | 0        | 0.146829 | 0        | 0.105379 | 0         |
| Mus_musc Mus_musc | 0        | 0        | 0.168936 | 0        | 0        | 0         |
| Mus_musc Mus_musc | 0.534693 | 0.65169  | 0.356916 | 0.291082 | 0.176102 | 0.266032  |
| Mus_musc Mus_musc | 0        | 0        | 0.337872 | 0        | 0        | 0         |
| Mus_musc Mus_musc | 0.368844 | 0.601044 | 0.798505 | 0.618219 | 0.300678 | 0.828758  |
| Mus_musc Mus_musc | 2.464792 | 4.065484 | 4.530259 | 2.323116 | 1.741651 | 1.288839  |
| Mus_musc Mus_musc | 1.136122 | 1.495563 | 0.185687 | 0.710382 | 0.570711 | 0.722368  |

|                   |          |          |          |          |          |           |
|-------------------|----------|----------|----------|----------|----------|-----------|
| ENSMUSG Dcbl2     | 5.878764 | 6.995393 | 5.64694  | 5.756527 | 5.657974 | 5.976624  |
| ENSMUSG Egl3      | 1.001327 | 0.977737 | 0.802859 | 1.902934 | 1.941895 | 2.436282  |
| ENSMUSG Eva1a     | 3.430275 | 3.000023 | 3.155667 | 3.052987 | 2.888519 | 2.702541  |
| ENSMUSG Clspn     | 0.271293 | 0.167324 | 0.243843 | 1.03633  | 0.932234 | 1.212088  |
| ENSMUSG 49304071  | 0        | 0        | 0        | 0        | 0        | 0         |
| ENSMUSG Leo1      | 5.571855 | 6.312417 | 7.488482 | 8.115299 | 8.924537 | 9.505531  |
| ENSMUSG Malrd1    | 0        | 0        | 0        | 0        | 0        | 0         |
| ENSMUSG Shc4      | 0.168853 | 0.123853 | 0.126484 | 0.192494 | 0.19189  | 0.3583    |
| ENSMUSG Ugt1a1    | 0.29348  | 0.143817 | 0.134895 | 0.09258  | 0.110204 | 0.178436  |
| ENSMUSG G6pc      | 0        | 0        | 0        | 0        | 0        | 0         |
| ENSMUSG Aoc2      | 0.596924 | 0.729177 | 0.87131  | 0.981895 | 0.71968  | 0.662361  |
| ENSMUSG Psme3     | 26.93259 | 26.56492 | 28.84938 | 27.82301 | 28.1025  | 27.071379 |
| ENSMUSG Cntd1     | 0.194969 | 0.244331 | 0.215145 | 0.214883 | 0.301321 | 0.378407  |
| ENSMUSG Gm10972   | 0        | 0        | 0        | 0        | 0        | 0         |
| ENSMUSG Vps25     | 50.1802  | 40.99256 | 42.81211 | 40.30378 | 49.0193  | 46.83932  |
| ENSMUSG Crnn      | 0        | 0        | 0        | 0        | 0        | 0         |
| ENSMUSG Lca5l     | 0.340443 | 0.271996 | 0.293528 | 0.601701 | 0.4884   | 0.537888  |
| ENSMUSG Cenph     | 0        | 0.368196 | 0.236592 | 0.736543 | 0.650812 | 0.825305  |
| ENSMUSG Rbp2      | 0        | 0        | 0.126229 | 0        | 0.227586 | 0.332281  |
| ENSMUSG Nmnat3    | 0.948928 | 0.973801 | 0.709672 | 0.954235 | 1.11975  | 1.351402  |
| ENSMUSG Trim42    | 0        | 0        | 0        | 0        | 0        | 0         |
| ENSMUSG Clstn2    | 7.508218 | 6.085967 | 6.765042 | 4.719454 | 4.7075   | 3.288083  |
| ENSMUSG Copb2     | 41.55818 | 43.56295 | 42.4137  | 47.21483 | 49.27484 | 49.821384 |
| ENSMUSG Mrps22    | 7.934392 | 6.920712 | 7.506721 | 5.909862 | 6.369687 | 7.766289  |
| ENSMUSG Fblim1    | 10.79057 | 8.582353 | 9.340908 | 10.33465 | 10.338   | 10.661383 |
| ENSMUSG Fam131c   | 0.378293 | 0.058902 | 0.106101 | 0.22854  | 0.161548 | 0.482512  |
| ENSMUSG Hpn       | 5.99856  | 8.216692 | 6.344723 | 7.909547 | 8.739721 | 10.084045 |
| ENSMUSG Gramd1a   | 16.3698  | 15.34373 | 20.80576 | 17.35863 | 17.70246 | 18.315785 |
| ENSMUSG Lsr       | 25.59701 | 21.40095 | 21.11017 | 19.79937 | 19.73818 | 23.788811 |
| ENSMUSG Zbtb17    | 7.046378 | 8.01246  | 6.691173 | 6.714517 | 6.699972 | 7.599712  |
| ENSMUSG Clcnkb    | 0        | 0        | 0.020286 | 0        | 0.025792 | 0.067173  |
| ENSMUSG Ndufv2    | 26.37203 | 26.74265 | 27.8105  | 30.38365 | 25.1758  | 25.356744 |
| ENSMUSG Twsg1     | 48.39698 | 52.13858 | 48.48515 | 39.84987 | 36.19171 | 39.26186  |
| ENSMUSG Gm5938    | 0        | 0        | 0        | 0        | 0        | 0         |
| ENSMUSG Tmsb10    | 158.828  | 155.3987 | 222.5362 | 231.1636 | 211.9356 | 226.96399 |
| ENSMUSG Gm14744   | 0        | 0        | 0        | 0        | 0        | 0         |
| ENSMUSG Srsf7     | 39.30898 | 39.682   | 50.60623 | 40.57517 | 32.71141 | 33.445989 |
| ENSMUSG Ralbp1    | 57.66087 | 58.80504 | 54.94276 | 48.38386 | 49.88108 | 48.0771   |
| ENSMUSG Hnrnp1l   | 22.51954 | 20.45743 | 21.53356 | 17.29152 | 18.30387 | 19.633179 |
| ENSMUSG Kcnj8     | 2.705498 | 3.324587 | 2.927011 | 2.584222 | 2.749023 | 2.004218  |
| ENSMUSG Tmtc4     | 2.638319 | 3.234796 | 2.689158 | 3.156661 | 3.442079 | 3.202255  |
| ENSMUSG Setbp1    | 3.207662 | 3.512578 | 2.822115 | 3.358636 | 3.724496 | 3.332461  |
| ENSMUSG Fam193a   | 8.167015 | 7.643348 | 7.728533 | 6.793187 | 7.410565 | 7.843865  |
| ENSMUSG Ldlrad4   | 12.39582 | 11.94386 | 8.58481  | 9.86779  | 10.13523 | 10.828053 |
| ENSMUSG 4930546C  | 0        | 0        | 0        | 0        | 0        | 0         |
| Mus_musc Mus_musc | 0        | 0        | 0        | 0.13515  | 0.121776 | 0.315547  |
| ENSMUSG Cep192    | 2.857622 | 2.730528 | 2.632809 | 3.490988 | 3.591042 | 3.712981  |
| Mus_musc Mus_musc | 0        | 0.148643 | 0        | 0.342379 | 0        | 0.096256  |
| Mus_musc Mus_musc | 0.149103 | 0.134117 | 0.098986 | 0.264423 | 0.321242 | 0.104324  |
| Mus_musc Mus_musc | 0.4566   | 0.430872 | 0.33243  | 0.490813 | 0.569717 | 0.397187  |
| Mus_musc Mus_musc | 0        | 0.056553 | 0        | 0        | 0        | 0.132354  |
| Mus_musc Mus_musc | 0.330847 | 0.118108 | 0        | 0        | 0        | 0         |
| Mus_musc Mus_musc | 0        | 0.128591 | 0        | 0.084449 | 0.071992 | 0.368372  |
| Mus_musc Mus_musc | 0        | 0        | 0        | 0        | 0        | 0.207265  |
| ENSMUSG Rcan3     | 7.181695 | 6.279291 | 5.695394 | 5.711371 | 5.638623 | 5.597474  |
| ENSMUSG Flot1     | 56.87614 | 55.91115 | 57.01457 | 41.77948 | 41.69004 | 42.116178 |
| ENSMUSG Fam198a   | 3.61214  | 3.833579 | 2.647855 | 3.386003 | 3.361192 | 3.275905  |
| ENSMUSG Dync1i2   | 43.39352 | 43.1079  | 45.73247 | 36.86008 | 38.07153 | 37.687891 |
| ENSMUSG Slc25a12  | 5.340022 | 5.694099 | 5.866642 | 5.606503 | 5.919009 | 5.865757  |
| ENSMUSG Setd3     | 52.27513 | 54.74291 | 54.70017 | 45.25703 | 43.5612  | 41.244144 |
| ENSMUSG Zfp385b   | 2.522909 | 2.760839 | 2.311139 | 3.976179 | 4.08522  | 4.604052  |
| ENSMUSG Cwc22     | 8.778895 | 7.277485 | 7.316961 | 8.346016 | 8.190135 | 7.872811  |
| ENSMUSG Cybrd1    | 4.858706 | 4.53208  | 4.662973 | 5.526015 | 6.582487 | 6.039853  |
| ENSMUSG Hat1      | 12.11977 | 12.05992 | 12.95945 | 12.89971 | 15.09241 | 13.926243 |

|                   |          |          |          |          |          |           |
|-------------------|----------|----------|----------|----------|----------|-----------|
| ENSMUSG Surf4     | 50.39226 | 48.32687 | 50.3798  | 59.7491  | 63.11011 | 65.517334 |
| ENSMUSG Tcp11l1   | 1.177171 | 1.267625 | 1.062039 | 1.308268 | 1.586407 | 1.260232  |
| ENSMUSG Gm11232   | 0        | 0        | 0        | 0.031074 | 0        | 0         |
| ENSMUSG Usp32     | 11.38858 | 10.93522 | 9.984202 | 10.55671 | 10.5995  | 10.01843  |
| ENSMUSG Car4      | 148.1362 | 155.6083 | 183.911  | 95.5557  | 101.852  | 99.160196 |
| ENSMUSG Cdc26     | 6.725796 | 5.579108 | 8.504753 | 6.533426 | 6.11544  | 5.33605   |
| ENSMUSG Prpf4     | 5.131966 | 4.783233 | 4.879661 | 3.891459 | 4.67889  | 4.101891  |
| ENSMUSG Actrt2    | 0        | 0        | 0        | 0        | 0        | 0         |
| ENSMUSG Gdf6      | 0.071656 | 0.076761 | 0.014349 | 0.175593 | 0.182992 | 0.156861  |
| ENSMUSG Zgrf1     | 0.32111  | 0.242649 | 0.269716 | 0.322181 | 0.592528 | 0.529309  |
| Mus_musc Mus_musc | 0        | 0        | 0        | 0.211813 | 0.34737  | 0.323217  |
| Mus_musc Mus_musc | 0.210985 | 0.100082 | 0.233719 | 0.349105 | 0.156076 | 0.239374  |
| Mus_musc Mus_musc | 0        | 0.285801 | 0.350796 | 0.205132 | 0        | 0.135604  |
| ENSMUSG Hipk3     | 40.96964 | 44.43556 | 35.50944 | 32.65429 | 35.86106 | 34.325061 |
| Mus_musc Mus_musc | 0.0359   | 0        | 0.175326 | 0.384674 | 0.130318 | 0.163486  |
| Mus_musc Mus_musc | 0        | 0.11091  | 0        | 0.725974 | 0.265453 | 0.260451  |
| Mus_musc Mus_musc | 0        | 0        | 0.120527 | 0.245251 | 0        | 0.079347  |
| ENSMUSG Ints12    | 7.210196 | 6.106599 | 5.92219  | 6.199457 | 6.113166 | 5.371871  |
| ENSMUSG Mxi1      | 9.683775 | 11.00898 | 10.28984 | 9.617728 | 9.633565 | 9.082638  |
| ENSMUSG Smndc1    | 21.16597 | 18.89188 | 20.12348 | 15.32001 | 17.39134 | 15.151031 |
| ENSMUSG Tdo2      | 0.916427 | 1.171239 | 1.101802 | 1.544514 | 2.704509 | 2.032222  |
| ENSMUSG Add3      | 56.60263 | 52.11755 | 47.10684 | 33.11673 | 35.16627 | 30.797645 |
| ENSMUSG Med28     | 10.03185 | 13.09371 | 9.583657 | 9.533953 | 8.709297 | 10.112521 |
| ENSMUSG Qdpr      | 27.09332 | 27.46899 | 28.81248 | 27.29546 | 28.12133 | 29.013296 |
| Mus_musc Mus_musc | 2.555741 | 2.118099 | 2.205838 | 1.263745 | 1.617094 | 2.142387  |
| Mus_musc Mus_musc | 0        | 0        | 0        | 0.203332 | 0        | 0         |
| Mus_musc Mus_musc | 0.200589 | 0.062392 | 0        | 0.205113 | 0.226457 | 0.12135   |
| Mus_musc Mus_musc | 0        | 0        | 0.180733 | 0        | 0        | 0         |
| Mus_musc Mus_musc | 0.14166  | 0.950972 | 1.47602  | 5.141525 | 4.67166  | 3.98991   |
| Mus_musc Mus_musc | 0.179032 | 0.467616 | 0.163545 | 0.778169 | 0.674311 | 0.675389  |
| Mus_musc Mus_musc | 0.233607 | 0.275272 | 0.289669 | 0.525298 | 0.553988 | 0.739679  |
| Mus_musc Mus_musc | 2.734744 | 3.016176 | 1.969578 | 4.245939 | 4.540344 | 4.125038  |
| Mus_musc Mus_musc | 0        | 0.348171 | 0        | 0        | 0.387499 | 0         |
| Mus_musc Mus_musc | 0        | 0.154309 | 0        | 0        | 0        | 0         |
| ENSMUSG Ms4a4b    | 12.51509 | 7.51943  | 19.91912 | 11.93242 | 8.505054 | 12.225747 |
| ENSMUSG Krt42     | 0        | 0        | 0        | 0        | 0        | 0         |
| ENSMUSG Taar8c    | 0        | 0        | 0        | 0        | 0        | 0         |
| Mus_musc Mus_musc | 0        | 0        | 0        | 0        | 0        | 0         |
| Mus_musc Mus_musc | 0        | 0        | 0        | 0        | 0.186692 | 0         |
| ENSMUSG Prr5      | 3.469424 | 2.624059 | 3.330535 | 8.100411 | 8.06379  | 8.19159   |
| ENSMUSG Rab3gap1  | 16.99691 | 17.02455 | 16.17687 | 14.84441 | 14.76887 | 14.957137 |
| ENSMUSG Rhoc      | 62.61945 | 64.08958 | 71.81112 | 63.54238 | 62.06661 | 64.522286 |
| ENSMUSG Colec12   | 18.43315 | 18.8611  | 19.06174 | 24.37753 | 24.61715 | 24.807127 |
| ENSMUSG Smim13    | 6.628203 | 6.929873 | 6.131934 | 5.466429 | 5.180452 | 5.447813  |
| ENSMUSG Vmn2r19   | 0        | 0        | 0        | 0        | 0        | 0         |
| ENSMUSG Mbnl3     | 1.993512 | 2.347219 | 1.587038 | 2.174052 | 2.025736 | 2.762987  |
| ENSMUSG Milt6     | 20.34339 | 19.99822 | 20.35665 | 16.58125 | 15.80947 | 16.010994 |
| ENSMUSG Smim1     | 15.28755 | 16.89861 | 14.91851 | 11.16936 | 11.83302 | 12.215453 |
| ENSMUSG Pnma1     | 0.812146 | 1.35346  | 0.904908 | 1.637847 | 1.320142 | 1.280715  |
| ENSMUSG Ifna16    | 0        | 0        | 0        | 0        | 0        | 0         |
| ENSMUSG Ceacam2   | 1.478639 | 1.376104 | 0.325221 | 1.109605 | 0.389973 | 0.555663  |
| ENSMUSG Mdm4      | 14.30566 | 14.35548 | 15.62422 | 14.80922 | 13.01842 | 12.936464 |
| Mus_musc Mus_musc | 0        | 0        | 0.168936 | 0        | 0        | 0         |
| ENSMUSG Klra10    | 0        | 0        | 0        | 0        | 0        | 0         |
| ENSMUSG Crnkl1    | 11.43765 | 11.63801 | 10.83481 | 10.95984 | 11.39573 | 10.814248 |
| ENSMUSG Me3       | 0.859075 | 1.154773 | 1.534542 | 0.857005 | 0.639718 | 0.641352  |
| ENSMUSG Smo       | 11.16242 | 11.17828 | 10.77749 | 10.09027 | 9.34961  | 11.331573 |
| ENSMUSG Tspan33   | 1.031627 | 0.860438 | 1.463407 | 1.455836 | 1.935084 | 1.619498  |
| ENSMUSG Ssty1     | 0        | 0        | 0        | 0        | 0        | 0         |
| ENSMUSG Rin2      | 43.02562 | 42.62222 | 36.66128 | 32.51332 | 35.95842 | 30.919275 |
| ENSMUSG Olfr1309  | 0        | 0        | 0        | 0        | 0        | 0         |
| ENSMUSG Pfas      | 2.084997 | 2.114363 | 2.055629 | 2.34156  | 2.383088 | 2.40088   |
| ENSMUSG Ctc1      | 4.23916  | 3.716285 | 3.792588 | 3.463523 | 3.821437 | 3.820844  |
| ENSMUSG Aurkb     | 1.120282 | 0.797819 | 1.051223 | 3.370247 | 4.420011 | 4.480731  |

|                    |          |          |          |          |          |           |
|--------------------|----------|----------|----------|----------|----------|-----------|
| ENSMUSG Tmem107    | 10.49498 | 13.72562 | 10.63269 | 13.03136 | 12.73042 | 10.869045 |
| ENSMUSG Vamp2      | 48.97901 | 41.14571 | 45.22848 | 27.13478 | 31.84259 | 28.610988 |
| ENSMUSG Per1       | 33.2729  | 35.5966  | 28.0427  | 10.33889 | 16.16495 | 14.833703 |
| ENSMUSG Olfr1493-r | 0        | 0        | 0        | 0        | 0        | 0         |
| ENSMUSG Alox8      | 0        | 0.025734 | 0.058284 | 0.036141 | 0.086402 | 0.08861   |
| ENSMUSG Gucy2e     | 0.023089 | 0.006112 | 0        | 0        | 0.022118 | 0.023612  |
| ENSMUSG Exo1       | 0.111617 | 0.08432  | 0.049147 | 0.303634 | 0.201781 | 0.185862  |
| ENSMUSG Bahcc1     | 5.265004 | 4.771995 | 4.164738 | 3.754528 | 3.989305 | 3.40607   |
| ENSMUSG Alg2       | 10.02853 | 9.90057  | 9.120091 | 9.87817  | 10.04437 | 9.758566  |
| ENSMUSG Gm4744     | 0        | 0        | 0        | 0        | 0        | 0         |
| ENSMUSG Fam71f1    | 0        | 0        | 0        | 0        | 0        | 0         |
| ENSMUSG Htatip2    | 8.024113 | 7.526048 | 8.469942 | 10.08452 | 9.890198 | 10.402459 |
| ENSMUSG Orai2      | 7.600991 | 7.460244 | 7.70361  | 8.260019 | 7.827847 | 9.916868  |
| ENSMUSG Gm10334    | 0        | 0        | 0        | 0        | 0        | 0         |
| ENSMUSG Mak16      | 11.03482 | 11.4402  | 10.058   | 10.61818 | 12.35489 | 12.34447  |
| ENSMUSG Plpp5      | 10.98514 | 10.50815 | 12.05973 | 18.02206 | 14.97678 | 16.813121 |
| ENSMUSG Kcnu1      | 0.076255 | 0.024918 | 0.202161 | 0.027953 | 0        | 0         |
| ENSMUSG Tti2       | 3.042927 | 2.60665  | 3.190477 | 2.721085 | 2.486696 | 2.481841  |
| ENSMUSG Star       | 1.592128 | 1.327617 | 1.156123 | 0.865264 | 0.931201 | 0.916468  |
| ENSMUSG Ash2l      | 11.54023 | 11.60386 | 10.33438 | 10.46019 | 10.24361 | 10.877602 |
| ENSMUSG Bmp15      | 0.055303 | 0.060513 | 0.048417 | 0.01706  | 0.018303 | 0         |
| ENSMUSG Etv6       | 5.529667 | 6.5235   | 5.795898 | 7.120502 | 6.410835 | 7.187265  |
| ENSMUSG Creld2     | 23.3828  | 27.88779 | 29.64681 | 88.98229 | 104.6724 | 98.910484 |
| ENSMUSG Tas2r103   | 0        | 0        | 0        | 0        | 0        | 0         |
| ENSMUSG Tas2r116   | 0        | 0        | 0        | 0        | 0        | 0         |
| ENSMUSG Twf2       | 27.91682 | 22.90138 | 25.5993  | 27.79145 | 28.02626 | 29.267305 |
| ENSMUSG Cd4        | 3.029708 | 2.100701 | 2.64365  | 5.895105 | 5.139656 | 4.890862  |
| ENSMUSG Esp34      | 0        | 0        | 0        | 0        | 0        | 0         |
| ENSMUSG Gm7030     | 0.84072  | 0.604258 | 1.598405 | 0.683536 | 0.774015 | 1.273754  |
| ENSMUSG Gm49373    | 0.124396 | 0.078907 | 0.456638 | 0.229536 | 0.14009  | 0.238341  |
| ENSMUSG Skint10    | 0        | 0        | 0        | 0        | 0        | 0         |
| ENSMUSG Tmprss11f  | 0        | 0        | 0        | 0.014481 | 0        | 0         |
| ENSMUSG Hoxb3      | 3.688082 | 3.165696 | 4.218639 | 3.668223 | 2.84367  | 2.710577  |
| ENSMUSG Atoh1      | 0        | 0        | 0        | 0        | 0        | 0         |
| ENSMUSG Ang5       | 0        | 0        | 0        | 0        | 0        | 0         |
| ENSMUSG Gm9044     | 0.029702 | 0.052295 | 0.032019 | 0.056887 | 0.055537 | 0.030743  |
| Mus_musc Mus_musc  | 0        | 0.079746 | 0.086869 | 0        | 0.072361 | 0         |
| ENSMUSG Pde5a      | 33.7121  | 32.9203  | 30.28975 | 21.12648 | 20.55046 | 18.083646 |
| Mus_musc Mus_musc  | 0        | 0        | 0        | 0        | 0.098451 | 0         |
| Mus_musc Mus_musc  | 0        | 0.133543 | 0.043999 | 0.281522 | 0.217075 | 0.461946  |
| ENSMUSG Pth2r      | 0        | 0        | 0        | 0        | 0        | 0         |
| ENSMUSG Crygf      | 0        | 0        | 0        | 0        | 0        | 0         |
| ENSMUSG Tmem70     | 10.38236 | 9.127955 | 9.903043 | 10.01939 | 10.95432 | 9.178239  |
| ENSMUSG Pikfyve    | 4.520962 | 4.633129 | 3.867244 | 4.270477 | 4.136839 | 4.286195  |
| ENSMUSG Cntnap5a   | 0        | 0        | 0        | 0        | 0        | 0         |
| ENSMUSG Zcrb1      | 43.47517 | 43.00762 | 48.93333 | 39.8114  | 37.18477 | 31.726321 |
| ENSMUSG Yaf2       | 17.1998  | 20.31531 | 18.8704  | 14.01749 | 15.42967 | 14.567286 |
| ENSMUSG Cblb       | 10.10287 | 9.643539 | 8.949447 | 8.902522 | 8.804053 | 8.640081  |
| ENSMUSG Alcam      | 73.60514 | 77.50829 | 62.93146 | 64.17145 | 62.47808 | 66.182048 |
| ENSMUSG Ankrd46    | 39.04661 | 37.86064 | 36.86331 | 28.64024 | 30.43709 | 29.475083 |
| Mus_musc Mus_musc  | 0        | 0.24281  | 0        | 0        | 0.188751 | 0         |
| Mus_musc Mus_musc  | 0.132701 | 0.057722 | 0.063193 | 0.377324 | 0        | 0         |
| Mus_musc Mus_musc  | 4.526783 | 3.289109 | 5.289113 | 4.833968 | 4.418175 | 5.824839  |
| Mus_musc Mus_musc  | 0.630825 | 0.396243 | 0.381776 | 0.644508 | 0.347057 | 0.71999   |
| ENSMUSG Olfr20     | 0        | 0        | 0        | 0        | 0        | 0         |
| ENSMUSG Lactb      | 5.835998 | 5.529969 | 7.077688 | 7.693779 | 6.822091 | 6.591493  |
| ENSMUSG Olfr149    | 0        | 0        | 0        | 0        | 0        | 0         |
| ENSMUSG Kif11      | 0.697383 | 0.702029 | 0.562355 | 1.845802 | 2.471998 | 2.417908  |
| ENSMUSG Defb45     | 0        | 0        | 0        | 0        | 0        | 0         |
| ENSMUSG Ctnnb2nl   | 51.91566 | 53.80042 | 44.42521 | 32.24146 | 36.33557 | 30.577331 |
| ENSMUSG Hist1h3c   | 0.268616 | 0.202807 | 0.027025 | 0.02025  | 0.066083 | 0.38153   |
| ENSMUSG Tex46      | 0        | 0        | 0        | 0        | 0        | 0         |
| ENSMUSG Hbb-bs     | 5434.924 | 6005.119 | 7281.495 | 2389.254 | 2419.342 | 1907.6362 |
| ENSMUSG Cst13      | 0.142164 | 0.114697 | 0.217049 | 0.063784 | 0        | 0         |

|                    |          |          |          |          |          |           |
|--------------------|----------|----------|----------|----------|----------|-----------|
| ENSMUSG Mucl2      | 0        | 0        | 0        | 0        | 0        | 0         |
| ENSMUSG Stag3      | 0.045992 | 0        | 0.054881 | 0.075706 | 0.0949   | 0.170411  |
| ENSMUSG Tbc1d30    | 11.28143 | 10.5829  | 8.310963 | 8.210467 | 8.189661 | 8.520868  |
| ENSMUSG Mrgpra6    | 0        | 0        | 0        | 0        | 0        | 0         |
| Mus_musc Mus_musc  | 0        | 0        | 0        | 0        | 0        | 0         |
| ENSMUSG Usp3       | 6.019057 | 6.517682 | 6.195885 | 6.686051 | 7.164069 | 7.822384  |
| ENSMUSG Pdap1      | 25.74492 | 25.2542  | 25.92756 | 24.25444 | 23.56356 | 23.127789 |
| ENSMUSG Arpc1b     | 82.15726 | 79.26081 | 84.74384 | 110.3829 | 129.7258 | 143.7903  |
| ENSMUSG Arpc1a     | 60.6622  | 62.64097 | 67.79813 | 57.96057 | 56.6034  | 59.046586 |
| ENSMUSG 1700018F2  | 0.035528 | 0        | 0.040051 | 0.151372 | 0.045758 | 0.063201  |
| ENSMUSG Zkscan14   | 4.685647 | 4.918484 | 4.786684 | 4.100423 | 4.344259 | 4.756001  |
| ENSMUSG Cpsf4      | 12.82655 | 13.10521 | 15.65545 | 13.61363 | 13.48304 | 14.798467 |
| ENSMUSG Ptc1       | 7.161791 | 6.917333 | 7.746466 | 6.237054 | 6.070727 | 6.098243  |
| ENSMUSG Phf14      | 11.01862 | 10.6926  | 9.174337 | 9.04313  | 9.215158 | 9.595893  |
| ENSMUSG Rilp       | 8.341887 | 9.82408  | 9.049373 | 6.908815 | 6.773208 | 7.605878  |
| ENSMUSG Hand2      | 0        | 0        | 0.037725 | 0.129013 | 0.021044 | 0         |
| ENSMUSG Cer1       | 0        | 0        | 0        | 0        | 0        | 0         |
| ENSMUSG Olfr562-ps | 0        | 0        | 0        | 0        | 0        | 0         |
| ENSMUSG 4931409K2  | 0        | 0        | 0        | 0        | 0        | 0         |
| ENSMUSG Rnf135     | 5.268576 | 6.137916 | 6.66574  | 6.953454 | 6.832385 | 6.694514  |
| ENSMUSG Ftsj3      | 9.441583 | 9.173034 | 9.215161 | 9.849015 | 9.404093 | 8.735138  |
| ENSMUSG Ddx42      | 20.24788 | 19.73541 | 21.2173  | 18.99641 | 17.36157 | 16.184128 |
| ENSMUSG Asic2      | 0        | 0.010419 | 0        | 0        | 0.016246 | 0.061217  |
| ENSMUSG 5530401A   | 0        | 0        | 0        | 0        | 0        | 0         |
| ENSMUSG Ccl1       | 0        | 0        | 0        | 1.32882  | 0.176522 | 0.736745  |
| ENSMUSG Tmem132c   | 0        | 0        | 0        | 0        | 0        | 0         |
| ENSMUSG Map3k3     | 40.98164 | 43.43917 | 42.51804 | 32.06681 | 34.59333 | 32.116871 |
| ENSMUSG Adap2      | 11.53333 | 10.502   | 10.97362 | 11.21259 | 11.36818 | 10.181166 |
| ENSMUSG Psmc5      | 49.71175 | 52.81116 | 55.73568 | 42.97488 | 44.67581 | 45.9883   |
| ENSMUSG Rps26      | 190.1768 | 201.9309 | 219.1803 | 273.8593 | 256.0009 | 242.37952 |
| ENSMUSG Esyt1      | 39.48955 | 33.27434 | 42.13612 | 40.08165 | 44.03956 | 49.507207 |
| ENSMUSG Pa2g4      | 31.68658 | 32.61599 | 32.06669 | 30.72222 | 28.96718 | 31.355901 |
| ENSMUSG Smarcc2    | 42.34629 | 44.28384 | 42.26287 | 39.58418 | 38.163   | 39.82032  |
| ENSMUSG 1700123L1  | 0        | 0.052997 | 0        | 0        | 0        | 0         |
| ENSMUSG Mbd3       | 59.84281 | 55.52872 | 69.17634 | 54.22193 | 58.41864 | 63.065076 |
| ENSMUSG Rybp       | 19.33728 | 23.11571 | 20.65501 | 13.79483 | 15.42915 | 14.928024 |
| ENSMUSG Tab3       | 3.03081  | 3.654101 | 3.056156 | 3.079927 | 2.845607 | 3.141467  |
| ENSMUSG Galm       | 3.663766 | 4.22661  | 3.077401 | 4.420165 | 5.188372 | 4.864981  |
| ENSMUSG Slc25a21   | 0        | 0        | 0        | 0        | 0.020752 | 0         |
| ENSMUSG Gpr27      | 0.839134 | 0.75061  | 0.471454 | 0.54493  | 0.642165 | 0.639715  |
| ENSMUSG Abca9      | 3.245736 | 3.789999 | 2.997241 | 4.67096  | 4.427363 | 4.272752  |
| ENSMUSG Pabpn1l    | 0.028397 | 0.196795 | 0.062569 | 0.062906 | 0.113674 | 0.057919  |
| ENSMUSG Epha7      | 0.723182 | 0.933917 | 0.741706 | 0.85763  | 0.79008  | 0.850295  |
| ENSMUSG Casp8ap2   | 4.644818 | 4.398599 | 4.339388 | 4.138482 | 4.204257 | 3.880854  |
| ENSMUSG Gabrr1     | 0        | 0.020251 | 0.005025 | 0.171504 | 0.143408 | 0.205135  |
| ENSMUSG 1700009N   | 0        | 0        | 0.040287 | 0        | 0        | 0.056954  |
| ENSMUSG Map3k7     | 11.93928 | 12.94372 | 11.34175 | 11.40216 | 10.99089 | 11.173917 |
| ENSMUSG Mrps16     | 3.709893 | 3.59669  | 3.724083 | 4.787947 | 3.836702 | 5.053019  |
| ENSMUSG Tex19.1    | 0        | 0        | 0.028947 | 0        | 0        | 0         |
| ENSMUSG Plekhf2    | 18.09643 | 19.3648  | 16.84311 | 13.25802 | 15.00635 | 14.067015 |
| ENSMUSG Col8a1     | 1.54559  | 1.432043 | 2.645068 | 2.87159  | 3.04943  | 2.608284  |
| ENSMUSG Gm8797     | 4.493567 | 5.610874 | 6.238226 | 3.677068 | 4.881814 | 4.555039  |
| ENSMUSG Pcdhgb1    | 0.653264 | 0.361777 | 0.373588 | 0.352097 | 0.315643 | 0.291404  |
| ENSMUSG Robo3      | 0.00455  | 0        | 0.007043 | 0        | 0        | 0         |
| ENSMUSG Robo4      | 22.1117  | 16.60969 | 17.50271 | 10.78289 | 13.28935 | 12.184366 |
| ENSMUSG Hmbs       | 11.68974 | 11.06174 | 12.31599 | 13.56698 | 13.12865 | 16.950405 |
| ENSMUSG Vps11      | 16.09007 | 13.8011  | 15.319   | 12.01547 | 12.41247 | 14.000666 |
| ENSMUSG C2cd2l     | 11.73529 | 10.38706 | 12.14911 | 10.51303 | 10.05724 | 10.130763 |
| ENSMUSG Tmem218    | 2.583153 | 2.578125 | 2.343078 | 2.136598 | 2.137802 | 1.807226  |
| ENSMUSG Slc37a2    | 1.502227 | 1.86691  | 1.70217  | 7.438411 | 7.074583 | 9.104529  |
| ENSMUSG Dpagt1     | 19.44861 | 18.55044 | 21.3816  | 17.99779 | 17.09539 | 17.429082 |
| ENSMUSG Hpcal1     | 103.083  | 91.94017 | 111.5455 | 69.90727 | 71.64324 | 65.811143 |
| ENSMUSG Tmem167l   | 25.15762 | 26.84724 | 26.40413 | 21.35634 | 22.493   | 21.326478 |
| ENSMUSG Olfr605    | 0        | 0        | 0        | 0        | 0        | 0         |

|                   |          |          |          |          |          |           |
|-------------------|----------|----------|----------|----------|----------|-----------|
| ENSMUSG Trp53i11  | 10.62694 | 8.390923 | 10.32419 | 19.9159  | 17.18018 | 19.946018 |
| ENSMUSG Sars      | 34.36536 | 38.18043 | 36.9739  | 35.59706 | 31.97286 | 32.531161 |
| ENSMUSG Tufm      | 21.33945 | 21.61393 | 23.67681 | 22.12953 | 26.35048 | 24.897609 |
| ENSMUSG Mup11     | 0        | 0        | 0        | 0        | 0        | 0         |
| ENSMUSG Mup14     | 0        | 0        | 0        | 0        | 0        | 0         |
| ENSMUSG Olfr715   | 0        | 0        | 0        | 0        | 0        | 0         |
| ENSMUSG Gm10767   | 0.202469 | 0.337247 | 0.234894 | 0.410838 | 0.393052 | 0.232396  |
| ENSMUSG Itpripl1  | 8.094235 | 8.308216 | 7.777722 | 6.780274 | 7.749454 | 7.791838  |
| ENSMUSG Rslcan18  | 0.053918 | 0.247792 | 0.158891 | 0.090233 | 0.102781 | 0.328727  |
| ENSMUSG Xcr1      | 0.657624 | 0.6644   | 0.837966 | 1.254456 | 1.104223 | 1.482176  |
| ENSMUSG Nlrp9b    | 0        | 0        | 0        | 0        | 0        | 0.016514  |
| ENSMUSG 2010315B  | 3.645868 | 6.113132 | 4.233586 | 5.484464 | 4.15941  | 5.67409   |
| ENSMUSG Khl20     | 7.44973  | 6.848952 | 7.595842 | 5.812853 | 5.446561 | 5.954843  |
| ENSMUSG Nsun6     | 3.496057 | 2.865454 | 2.721952 | 2.513554 | 2.589945 | 2.301921  |
| ENSMUSG Prdx6     | 569.9971 | 583.7356 | 457.3911 | 269.6429 | 294.116  | 265.19452 |
| ENSMUSG Tnfsf4    | 0        | 0        | 0        | 0.295128 | 0.068616 | 0.101792  |
| ENSMUSG Dars2     | 3.199652 | 3.339629 | 3.039217 | 3.47718  | 3.689018 | 3.5457    |
| ENSMUSG Cenpl     | 1.724637 | 1.678302 | 2.286779 | 2.018698 | 2.310983 | 2.051776  |
| ENSMUSG 4930558K  | 0        | 0.013317 | 0        | 0        | 0        | 0         |
| ENSMUSG Cables1   | 6.135266 | 6.201255 | 6.508078 | 4.705997 | 4.994859 | 4.729153  |
| ENSMUSG Mgl2      | 5.18177  | 7.367734 | 5.53582  | 20.71045 | 27.08912 | 25.859185 |
| ENSMUSG Rps19     | 227.5963 | 245.4866 | 244.7598 | 229.2759 | 204.4615 | 211.91598 |
| ENSMUSG Rhbdf1    | 18.63532 | 18.63626 | 21.30883 | 12.16097 | 12.37672 | 11.78071  |
| ENSMUSG Spaca4    | 0        | 0        | 0.03632  | 0.279361 | 0.155005 | 0.459814  |
| ENSMUSG Pus10     | 4.042332 | 4.314732 | 3.601355 | 4.691133 | 4.541834 | 4.553493  |
| ENSMUSG 1700093K  | 0        | 0        | 0        | 0        | 0        | 0         |
| ENSMUSG Mpg       | 4.589085 | 4.353152 | 3.719118 | 4.227794 | 4.33488  | 4.641151  |
| ENSMUSG 1810043G  | 5.369685 | 5.820506 | 5.550595 | 6.476059 | 6.08592  | 6.00358   |
| ENSMUSG Rasal2    | 13.86774 | 11.93922 | 12.8655  | 7.344872 | 7.898188 | 6.280168  |
| ENSMUSG Ahsa2     | 7.014535 | 9.503886 | 12.77896 | 7.666741 | 8.365782 | 8.244225  |
| ENSMUSG Nprl3     | 6.278112 | 5.99403  | 5.558384 | 5.374718 | 4.745897 | 5.262676  |
| Mus_musc Mus_musc | 1.166631 | 1.097604 | 0.954838 | 0.508348 | 0.69331  | 0.797907  |
| ENSMUSG Neur1a    | 1.420116 | 1.483524 | 1.061977 | 1.701241 | 1.460844 | 1.837432  |
| Mus_musc Mus_musc | 1.218942 | 1.659433 | 2.08923  | 1.714361 | 1.705359 | 1.301893  |
| Mus_musc Mus_musc | 0        | 0        | 0.202822 | 0        | 0        | 0.165982  |
| Mus_musc Mus_musc | 0        | 0        | 0        | 0.175184 | 0        | 0         |
| Mus_musc Mus_musc | 0        | 0        | 0        | 0        | 0        | 0.217998  |
| Mus_musc Mus_musc | 0.348206 | 0        | 0        | 0        | 0        | 0.148941  |
| Mus_musc Mus_musc | 0.15714  | 0.337    | 0        | 0        | 0        | 0         |
| Mus_musc Mus_musc | 0.178241 | 0.244461 | 0.284967 | 0.037708 | 0.12065  | 0         |
| Mus_musc Mus_musc | 0        | 0        | 0        | 0        | 0.076664 | 0         |
| ENSMUSG Cog3      | 11.06846 | 11.96905 | 11.34186 | 9.425044 | 10.48068 | 9.743857  |
| Mus_musc Mus_musc | 0        | 0        | 0        | 0.145739 | 0.340247 | 0         |
| Mus_musc Mus_musc | 0.272683 | 0.311248 | 0.44891  | 0.066026 | 0.260097 | 0         |
| ENSMUSG Hif1a     | 20.66545 | 20.04011 | 19.90542 | 20.71425 | 21.535   | 23.027342 |
| Mus_musc Mus_musc | 0        | 0.627504 | 0        | 0        | 0.204345 | 0         |
| Mus_musc Mus_musc | 0.099394 | 0.057476 | 0.097614 | 0.892135 | 1.220064 | 1.157541  |
| ENSMUSG Nckap5l   | 5.36279  | 4.816807 | 5.321263 | 3.665325 | 3.241276 | 3.771878  |
| ENSMUSG Gm20822   | 0        | 0        | 0        | 0        | 0        | 0         |
| Mus_musc Mus_musc | 0        | 0        | 0        | 0        | 0        | 0         |
| ENSMUSG Spint5    | 0        | 0        | 0        | 0        | 0        | 0         |
| ENSMUSG Ankub1    | 0.24306  | 0.20016  | 0.12444  | 0.798573 | 0.670702 | 0.416777  |
| ENSMUSG Spint3    | 0        | 0        | 0        | 0        | 0        | 0         |
| ENSMUSG Wfdc6a    | 2.649826 | 1.880865 | 2.513015 | 1.229227 | 1.445472 | 1.19252   |
| ENSMUSG Wfdc9     | 0        | 0        | 0        | 0        | 0        | 0         |
| ENSMUSG Gm20479   | 0        | 0.072191 | 0        | 0        | 0        | 0         |
| Mus_musc Mus_musc | 0.257577 | 0        | 0        | 0        | 0.295809 | 0         |
| ENSMUSG Dynll1    | 71.23196 | 81.27849 | 85.80427 | 75.76997 | 75.00257 | 75.94533  |
| ENSMUSG Gm10354   | 0        | 0.088585 | 0        | 0        | 0.320526 | 0.386866  |
| Mus_musc Mus_musc | 0.055856 | 0.257818 | 0.294992 | 0.374127 | 0.2847   | 0.144616  |
| Mus_musc Mus_musc | 0        | 0.09265  | 0        | 0.037861 | 0.113265 | 0.231196  |
| Mus_musc Mus_musc | 0.03206  | 0.060134 | 0.03561  | 0.480831 | 0.283396 | 0.505014  |
| Mus_musc Mus_musc | 0        | 0        | 0        | 0        | 0        | 0         |
| Mus_musc Mus_musc | 0        | 0        | 0        | 0        | 0        | 0.184186  |



|                   |          |          |          |          |          |           |
|-------------------|----------|----------|----------|----------|----------|-----------|
| ENSMUSG Dynlrb2   | 27.34239 | 28.76394 | 19.51342 | 44.50859 | 38.16826 | 30.772305 |
| ENSMUSG Scara3    | 1.18752  | 1.082353 | 0.748307 | 1.236158 | 1.440028 | 1.456183  |
| ENSMUSG Pkd2      | 27.37989 | 26.94943 | 25.88125 | 17.44413 | 19.24026 | 17.647467 |
| ENSMUSG Six4      | 1.782716 | 2.35162  | 1.118863 | 1.563903 | 1.639735 | 1.772107  |
| ENSMUSG Camk2n1   | 8.889965 | 9.339826 | 8.5603   | 6.474741 | 5.685189 | 5.57325   |
| ENSMUSG Cmtr2     | 2.453054 | 2.378969 | 1.867972 | 2.239777 | 1.714222 | 2.360226  |
| ENSMUSG Ppm1e     | 0.250244 | 0.407956 | 0.29636  | 0.650387 | 0.49354  | 0.466795  |
| ENSMUSG Nexmif    | 1.175901 | 1.337022 | 1.117429 | 1.725409 | 1.817523 | 1.513177  |
| Mus_musc Mus_musc | 0.40055  | 0.257855 | 0.317374 | 0.292879 | 0.416543 | 0.217999  |
| Mus_musc Mus_musc | 0        | 0        | 0        | 0.051289 | 0        | 0         |
| Mus_musc Mus_musc | 0.249484 | 0.087271 | 0.300664 | 0.22347  | 0        | 0.18255   |
| ENSMUSG Dhrr7b    | 6.800517 | 7.493927 | 6.571702 | 5.972815 | 7.517559 | 6.534818  |
| ENSMUSG Nek10     | 0.147564 | 0.38833  | 0.198258 | 0.38663  | 0.401231 | 0.526116  |
| ENSMUSG Fam227a   | 0.779311 | 0.859073 | 0.890003 | 1.104316 | 0.558432 | 1.006194  |
| ENSMUSG Hmnr      | 0.186534 | 0.3377   | 0.31248  | 1.192337 | 2.01752  | 2.222942  |
| ENSMUSG Cyp4a12b  | 0.118943 | 0.987421 | 0        | 0.157741 | 0.079744 | 0.154117  |
| ENSMUSG Capn3     | 0.123281 | 0.070303 | 0.102572 | 0.104936 | 0.104934 | 0.170317  |
| ENSMUSG 1700042G  | 0        | 0        | 0        | 0        | 0        | 0         |
| ENSMUSG Hs3st4    | 0.035378 | 0        | 0        | 0        | 0        | 0.016518  |
| Mus_musc Mus_musc | 0.145401 | 0        | 0        | 0.326961 | 0        | 0.299051  |
| ENSMUSG Skint8    | 0        | 0        | 0        | 0        | 0        | 0         |
| ENSMUSG Skint5    | 0        | 0        | 0        | 0        | 0        | 0         |
| ENSMUSG Scn9a     | 0        | 0.011761 | 0        | 0.010611 | 0.004079 | 0.00526   |
| ENSMUSG Scn2a     | 0.186877 | 0.142684 | 0.064039 | 0.148879 | 0.082074 | 0.069877  |
| ENSMUSG Psat1     | 4.012602 | 3.68734  | 4.623909 | 6.554761 | 6.936477 | 6.174339  |
| ENSMUSG Pnmal1    | 0        | 0        | 0        | 0        | 0        | 0.01351   |
| ENSMUSG Tmco4     | 6.295244 | 5.423107 | 6.307952 | 6.027032 | 5.815806 | 6.416267  |
| ENSMUSG Dnah7b    | 0.384004 | 0.453453 | 0.23479  | 0.543628 | 0.540838 | 0.464104  |
| ENSMUSG Brca2     | 0.536883 | 0.35357  | 0.356304 | 0.439604 | 0.518148 | 0.504051  |
| ENSMUSG Hyi       | 7.254841 | 6.304695 | 7.221908 | 6.932592 | 6.939159 | 7.266417  |
| Mus_musc Mus_musc | 0.361756 | 0        | 0        | 0        | 0        | 0         |
| ENSMUSG Elov1     | 99.90615 | 100.8329 | 103.9021 | 110.8561 | 87.60972 | 130.47187 |
| ENSMUSG Med8      | 18.94651 | 19.90484 | 20.85835 | 20.34012 | 20.74453 | 23.15392  |
| Mus_musc Mus_musc | 0        | 0        | 0.135834 | 0        | 0.094608 | 0         |
| ENSMUSG Oas1c     | 1.786558 | 1.047094 | 1.227588 | 1.154471 | 1.031288 | 1.718359  |
| Mus_musc Mus_musc | 0.098862 | 0.129811 | 0.067226 | 0.300671 | 0        | 0.057058  |
| Mus_musc Mus_musc | 0        | 0        | 0        | 0        | 0        | 0         |
| ENSMUSG Pcdhga8   | 0.759187 | 0.948936 | 1.391269 | 0.480779 | 0.461045 | 0.618367  |
| ENSMUSG Slc6a2    | 5.907719 | 5.858327 | 5.394789 | 3.947525 | 5.334718 | 3.302864  |
| ENSMUSG Prl2c5    | 0        | 0        | 0        | 0        | 0        | 0         |
| Mus_musc Mus_musc | 4.393151 | 4.047877 | 3.569505 | 4.091574 | 3.012899 | 2.913057  |
| Mus_musc Mus_musc | 0.202589 | 0.196719 | 0        | 0.452042 | 0.048901 | 0.419707  |
| Mus_musc Mus_musc | 0.130942 | 0        | 0.40407  | 0.291202 | 0        | 0.07258   |
| ENSMUSG Zfp366    | 12.05245 | 13.40397 | 10.84493 | 8.442921 | 8.324622 | 7.504996  |
| Mus_musc Mus_musc | 0        | 0        | 0        | 0.394879 | 0.18857  | 0.248291  |
| ENSMUSG Otop1     | 0.035189 | 0        | 0        | 0.061642 | 0        | 0.045959  |
| ENSMUSG Ccnb3     | 0        | 0        | 0        | 0        | 0.036896 | 0         |
| ENSMUSG Olfr272   | 0        | 0        | 0        | 0        | 0        | 0         |
| ENSMUSG Map3k19   | 1.062506 | 1.245885 | 0.700434 | 1.635941 | 1.613923 | 1.414126  |
| ENSMUSG Olfr697   | 0        | 0        | 0        | 0        | 0        | 0         |
| ENSMUSG Pcdhb2    | 0.118714 | 0.11997  | 0.150559 | 0.19562  | 0.194325 | 0.237877  |
| ENSMUSG 4932411N  | 0        | 0        | 0        | 0        | 0        | 0         |
| ENSMUSG Tubb2a    | 43.3661  | 43.62734 | 59.99194 | 35.68734 | 36.90412 | 47.743591 |
| ENSMUSG Astl      | 0        | 0        | 0        | 0.032212 | 0        | 0         |
| ENSMUSG Gm17324   | 0        | 0.004194 | 0.074934 | 0        | 0.075645 | 0.099779  |
| ENSMUSG Vmn2r104  | 0        | 0        | 0        | 0        | 0        | 0         |
| ENSMUSG 2310050C  | 0        | 0        | 0        | 0        | 0        | 0         |
| ENSMUSG Krt78     | 0.046228 | 0.035782 | 0        | 0.08176  | 0.072895 | 0.055572  |
| ENSMUSG Syngr4    | 0        | 0        | 0        | 0.181112 | 0        | 0.057142  |
| ENSMUSG Tm7sf3    | 14.9496  | 14.15553 | 14.78092 | 11.29067 | 11.82582 | 13.156756 |
| ENSMUSG Trappc5   | 12.50987 | 13.65675 | 15.36888 | 13.59259 | 12.6281  | 13.282518 |
| ENSMUSG Ugt2b38   | 0        | 0        | 0        | 0        | 0        | 0         |
| ENSMUSG Slc25a3   | 145.9332 | 146.7977 | 151.3804 | 166.8356 | 165.4908 | 169.62745 |
| Mus_musc Mus_musc | 0.573931 | 0.575989 | 0.293836 | 1.974693 | 1.654993 | 1.355749  |

|                   |          |          |          |          |          |           |
|-------------------|----------|----------|----------|----------|----------|-----------|
| Mus_musc Mus_musc | 0.455278 | 0.090327 | 0.713286 | 0.658809 | 0.158036 | 0.522111  |
| Mus_musc Mus_musc | 2.214421 | 2.373471 | 1.712175 | 0.937924 | 1.194497 | 0.601404  |
| Mus_musc Mus_musc | 0        | 0.110689 | 0.154213 | 0.28737  | 0.044373 | 0.09199   |
| Mus_musc Mus_musc | 0        | 0.163954 | 0        | 0        | 0.368472 | 0         |
| Mus_musc Mus_musc | 1.860925 | 1.734777 | 2.168622 | 1.329533 | 0.497846 | 1.045489  |
| Mus_musc Mus_musc | 1.218099 | 1.038387 | 2.140288 | 0.608677 | 0.390912 | 1.100292  |
| ENSMUSG Hmx1      | 0        | 0        | 0        | 0        | 0        | 0         |
| ENSMUSG Cyp4f13   | 12.45549 | 10.40416 | 11.41614 | 9.822984 | 8.057591 | 9.300733  |
| ENSMUSG Olfr1504  | 0        | 0        | 0        | 0        | 0        | 0         |
| ENSMUSG Sash1     | 30.69286 | 27.1719  | 24.2737  | 18.17882 | 21.84675 | 18.208938 |
| ENSMUSG Olfr961   | 0        | 0        | 0        | 0        | 0        | 0         |
| ENSMUSG Ifitm6    | 1.256125 | 1.838445 | 4.21525  | 3.574549 | 0.682568 | 1.392926  |
| ENSMUSG Cacna1c   | 5.604794 | 3.792039 | 5.138913 | 4.656613 | 4.452644 | 5.044497  |
| ENSMUSG Gfod1     | 5.009365 | 7.290171 | 6.944963 | 5.121345 | 5.113371 | 5.40853   |
| ENSMUSG 2900026A  | 16.37167 | 14.4404  | 13.54349 | 9.431941 | 10.72377 | 9.592654  |
| ENSMUSG Krtap6-3  | 0        | 0        | 0        | 0        | 0        | 0         |
| ENSMUSG Olfr1310  | 0        | 0        | 0        | 0        | 0        | 0         |
| ENSMUSG Fam204a   | 10.92772 | 9.671741 | 10.3844  | 8.183419 | 8.486979 | 6.493493  |
| ENSMUSG Tunar     | 0        | 0        | 0        | 0        | 0        | 0         |
| ENSMUSG Gm14214   | 0        | 0        | 0        | 0        | 0        | 0         |
| ENSMUSG Gm17332   | 0        | 0        | 0        | 0        | 0.036503 | 0         |
| ENSMUSG Gm21746   | 0        | 0        | 0        | 0        | 0        | 0         |
| ENSMUSG Olfr784   | 0        | 0        | 0        | 0        | 0        | 0         |
| ENSMUSG Gm8082    | 0        | 0        | 0        | 0        | 0        | 0         |
| ENSMUSG Olfr560   | 0        | 0        | 0        | 0        | 0        | 0         |
| ENSMUSG Olfr1501  | 0        | 0        | 0        | 0        | 0        | 0         |
| ENSMUSG Snrpg     | 13.80365 | 10.18456 | 13.24556 | 12.6071  | 10.5314  | 14.744414 |
| Mus_musc Mus_musc | 0.188031 | 0        | 0        | 0        | 0        | 0         |
| Mus_musc Mus_musc | 1.436346 | 1.066402 | 0.893251 | 0.83158  | 1.334177 | 0.817938  |
| Mus_musc Mus_musc | 0        | 0        | 0        | 0        | 0        | 0         |
| Mus_musc Mus_musc | 0.523357 | 0.42738  | 0.537575 | 0.47093  | 0.182365 | 0.31113   |
| Mus_musc Mus_musc | 0        | 0        | 0        | 0        | 0        | 0.342747  |
| Mus_musc Mus_musc | 0        | 0        | 0        | 0.174016 | 0        | 0         |
| Mus_musc Mus_musc | 0        | 0        | 0        | 0        | 0.186692 | 0         |
| Mus_musc Mus_musc | 0.245862 | 0.107393 | 0.22891  | 0        | 0        | 0         |
| ENSMUSG Vmn1r72   | 0        | 0        | 0        | 0        | 0        | 0         |
| ENSMUSG Zfp748    | 3.106016 | 3.704535 | 3.216436 | 3.249038 | 3.007603 | 3.1266    |
| ENSMUSG B9d2      | 8.143444 | 8.123207 | 10.06442 | 9.815636 | 9.564501 | 9.748621  |
| ENSMUSG Wscd2     | 0.545562 | 0.455969 | 0.516979 | 0.549393 | 0.547883 | 0.661735  |
| ENSMUSG Sorcs3    | 0        | 0        | 0        | 0        | 0.021771 | 0         |
| ENSMUSG Olfr490   | 0        | 0        | 0        | 0        | 0        | 0         |
| ENSMUSG Tmem63b   | 34.06346 | 30.60503 | 31.90953 | 21.94125 | 21.8396  | 22.318646 |
| ENSMUSG Klrc2     | 0.383175 | 0.249634 | 1.553623 | 0.364406 | 0.250317 | 0.396471  |
| ENSMUSG Gm20850   | 0        | 0        | 0        | 0        | 0        | 0         |
| ENSMUSG Suclg1    | 37.96748 | 42.64916 | 39.86193 | 39.39648 | 39.5517  | 40.345151 |
| ENSMUSG Kctd18    | 4.662312 | 4.600872 | 5.523197 | 4.652055 | 4.009023 | 4.182031  |
| ENSMUSG Med13l    | 10.76476 | 10.76397 | 10.09917 | 8.280864 | 9.220838 | 8.560245  |
| ENSMUSG Exosc5    | 19.77972 | 18.41283 | 18.23372 | 14.8788  | 14.47732 | 15.065267 |
| ENSMUSG Taok3     | 27.20713 | 25.52039 | 22.70629 | 24.68878 | 26.70175 | 26.106685 |
| ENSMUSG Gm45233   | 0.020404 | 0.119452 | 0        | 0.305763 | 0        | 0         |
| ENSMUSG Bpifb9a   | 0        | 0        | 0        | 0        | 0        | 0         |
| ENSMUSG Zfp677    | 1.163714 | 1.282541 | 1.331946 | 2.124898 | 1.799328 | 1.874452  |
| ENSMUSG Gm5239    | 0        | 0.069418 | 0.068673 | 0        | 0        | 0         |
| ENSMUSG Bpifb9b   | 0        | 0        | 0        | 0        | 0        | 0         |
| ENSMUSG Gtf2f2    | 6.693904 | 5.736266 | 7.273445 | 7.733577 | 7.429007 | 7.31135   |
| Mus_musc Mus_musc | 0        | 0.087017 | 0        | 0.348365 | 0.108436 | 0.051932  |
| ENSMUSG Ranbp3    | 23.31365 | 23.16741 | 25.79712 | 22.41744 | 24.20441 | 24.397237 |
| ENSMUSG Blnk      | 1.840771 | 2.567551 | 2.107392 | 15.74411 | 17.67708 | 17.953285 |
| ENSMUSG Gsdma2    | 0        | 0        | 0        | 0        | 0        | 0         |
| ENSMUSG Med24     | 10.15713 | 8.485869 | 9.514668 | 9.739837 | 10.51411 | 10.639715 |
| ENSMUSG Prpf40a   | 13.02824 | 13.13812 | 11.74229 | 12.85647 | 12.57581 | 12.750149 |
| ENSMUSG Gm49368   | 0.464602 | 0.209751 | 1.08296  | 1.001382 | 3.741583 | 1.776136  |
| ENSMUSG Zfp868    | 11.66928 | 13.20287 | 11.4021  | 11.08539 | 10.27198 | 10.067525 |
| ENSMUSG Rhox3h    | 0        | 0        | 0        | 0        | 0        | 0         |

|                  |          |          |          |          |          |           |
|------------------|----------|----------|----------|----------|----------|-----------|
| ENSMUSG Rhox7a   | 0        | 0        | 0        | 0        | 0        | 0         |
| ENSMUSG Rhox12   | 0        | 0        | 0        | 0        | 0        | 0         |
| ENSMUSG Olfr1320 | 0        | 0        | 0        | 0        | 0        | 0         |
| ENSMUSG Sntb1    | 9.467013 | 9.653034 | 7.048804 | 9.699516 | 9.858771 | 9.86986   |
| ENSMUSG Klf1     | 0.065012 | 0.125565 | 0.147405 | 0        | 0        | 0.036115  |
| ENSMUSG Cthrc1   | 4.284363 | 3.826356 | 2.310884 | 3.41978  | 2.922231 | 4.664999  |
| ENSMUSG Gon4l    | 9.00698  | 8.559035 | 7.62477  | 7.32507  | 7.51487  | 7.369351  |
| ENSMUSG Znrf1    | 18.9491  | 16.1799  | 22.38478 | 17.17308 | 18.02297 | 15.188142 |
| ENSMUSG Angptl1  | 0.187038 | 0.077242 | 0.210776 | 0.334976 | 0.149298 | 0.195303  |
| ENSMUSG Cyld     | 10.38785 | 10.62516 | 9.804795 | 12.91638 | 12.1627  | 12.185518 |
| ENSMUSG Gtf2a2   | 21.57125 | 19.76569 | 20.84387 | 19.14689 | 15.98847 | 19.761133 |
| ENSMUSG Arhgef5  | 15.38083 | 15.94271 | 13.6107  | 11.56842 | 9.780354 | 11.579047 |
| ENSMUSG Vmn1r115 | 0        | 0        | 0        | 0        | 0        | 0         |
| ENSMUSG Micall2  | 0.731839 | 0.786258 | 0.511252 | 1.207829 | 1.30121  | 1.669124  |
| ENSMUSG Olfr967  | 0        | 0        | 0        | 0        | 0        | 0         |
| ENSMUSG Tescl    | 0        | 0        | 0        | 0        | 0        | 0         |
| ENSMUSG Gsdmc3   | 0        | 0        | 0        | 0.056701 | 0        | 0.025358  |
| ENSMUSG Olfr348  | 0        | 0        | 0        | 0        | 0        | 0         |
| ENSMUSG Fbxw13   | 0        | 0        | 0        | 0        | 0        | 0         |
| ENSMUSG Sorl1    | 27.18556 | 24.18072 | 22.13797 | 19.43657 | 19.85038 | 19.970367 |
| ENSMUSG Bmp7     | 0.408802 | 0.553411 | 0.292071 | 0.280607 | 0.492064 | 0.323656  |
| ENSMUSG Fbxl14   | 19.34427 | 17.79843 | 19.07063 | 15.86066 | 16.19756 | 16.245377 |
| ENSMUSG Zfp638   | 12.65025 | 14.23238 | 12.60138 | 13.06008 | 12.45714 | 12.84872  |
| ENSMUSG Smpd1    | 34.35434 | 35.13004 | 32.37312 | 32.4791  | 34.13289 | 36.380783 |
| ENSMUSG Kat2a    | 8.971498 | 7.907092 | 9.703495 | 9.086601 | 8.134211 | 8.610874  |
| ENSMUSG Stat5b   | 21.87187 | 20.29947 | 20.63436 | 16.95113 | 16.95902 | 16.914738 |
| ENSMUSG Krt12    | 0        | 0        | 0        | 0        | 0        | 0         |
| ENSMUSG Krt24    | 0        | 0        | 0        | 0        | 0        | 0         |
| ENSMUSG Adprm    | 9.327713 | 10.48347 | 9.783466 | 10.99628 | 9.724051 | 8.764873  |
| ENSMUSG Krt19    | 98.36365 | 87.82225 | 96.53909 | 58.33046 | 57.47127 | 70.097008 |
| ENSMUSG Krt36    | 0        | 0        | 0        | 0        | 0        | 0         |
| ENSMUSG Acly     | 62.87386 | 66.045   | 60.96102 | 66.58015 | 63.05292 | 77.657774 |
| ENSMUSG Top2a    | 1.689006 | 2.076958 | 1.931024 | 5.779047 | 8.299907 | 8.783419  |
| ENSMUSG Alox15   | 1.371875 | 1.155558 | 0.900257 | 16.88509 | 23.78808 | 27.039827 |
| ENSMUSG Heatr9   | 0.111014 | 0.154556 | 0.269307 | 0.115176 | 0.152042 | 0.16228   |
| ENSMUSG Ccl6     | 120.7705 | 103.1996 | 101.5482 | 423.1665 | 503.3287 | 464.62802 |
| ENSMUSG Cxcl16   | 26.45878 | 24.4011  | 28.42156 | 49.32352 | 41.07648 | 48.12449  |
| ENSMUSG Pelp1    | 7.87884  | 7.072811 | 6.416008 | 6.921569 | 6.618509 | 6.903979  |
| ENSMUSG Adat1    | 1.661192 | 2.002937 | 1.987775 | 1.648961 | 1.966436 | 1.813358  |
| ENSMUSG Med11    | 15.7907  | 17.49806 | 17.11319 | 17.21588 | 16.50532 | 15.78505  |
| ENSMUSG Vmn2r86  | 0        | 0        | 0        | 0        | 0        | 0         |
| ENSMUSG Gm7942   | 0        | 0        | 0        | 0        | 0        | 0         |
| ENSMUSG Gm3696   | 0.023115 | 0.037004 | 0.055877 | 0.014831 | 0        | 0.042559  |
| ENSMUSG Rergl    | 0        | 0        | 0        | 0        | 0        | 0         |
| ENSMUSG Gm5624   | 0        | 0        | 0        | 0        | 0        | 0         |
| ENSMUSG Cyp2d12  | 0        | 0        | 0        | 0        | 0        | 0         |
| ENSMUSG Gm21748  | 0.062981 | 0        | 0        | 0.115636 | 0.131863 | 0.25944   |
| ENSMUSG Myl12b   | 236.6603 | 222.6907 | 243.5724 | 155.2191 | 149.6613 | 151.40638 |
| ENSMUSG Cd300lb  | 3.677944 | 3.034297 | 4.425045 | 17.4487  | 14.17667 | 18.968888 |
| ENSMUSG Ifnz     | 0        | 0.047391 | 0.051998 | 0.017854 | 0.019154 | 0.018897  |
| ENSMUSG Olfr805  | 0        | 0        | 0        | 0        | 0        | 0         |
| ENSMUSG Vmn1r176 | 0        | 0        | 0        | 0        | 0        | 0         |
| ENSMUSG Gm2431   | 0        | 0        | 0        | 0        | 0        | 0         |
| ENSMUSG Gm6133   | 0.029752 | 0.048832 | 0.052213 | 0.03194  | 0        | 0.037304  |
| ENSMUSG Rhebl1   | 2.319501 | 2.203436 | 1.924866 | 1.645644 | 1.47654  | 1.046838  |
| ENSMUSG Vmn1r17  | 0        | 0        | 0        | 0        | 0        | 0         |
| ENSMUSG Edem3    | 15.1698  | 15.6275  | 14.68875 | 15.62333 | 16.11374 | 15.331165 |
| ENSMUSG Sgcz     | 0        | 0        | 0        | 0        | 0        | 0         |
| ENSMUSG Olfr1337 | 0        | 0        | 0        | 0        | 0        | 0         |
| ENSMUSG Arxes2   | 10.15511 | 8.689618 | 7.454456 | 5.298872 | 7.667132 | 5.350634  |
| ENSMUSG Onecut1  | 0        | 0.035175 | 0        | 0        | 0.028308 | 0.014895  |
| ENSMUSG Nemp2    | 2.331063 | 2.466367 | 2.696503 | 3.128678 | 2.759031 | 2.425011  |
| ENSMUSG Tusc3    | 54.18944 | 51.35989 | 47.44747 | 45.97369 | 51.18722 | 48.512124 |
| ENSMUSG Ptgir    | 1.607886 | 1.148238 | 1.73134  | 7.869185 | 7.600001 | 8.335084  |

|                  |          |          |          |          |          |           |
|------------------|----------|----------|----------|----------|----------|-----------|
| ENSMUSG Ndufb11  | 52.34251 | 61.55284 | 59.4131  | 59.83984 | 55.85035 | 55.744312 |
| ENSMUSG Slc34a2  | 467.0029 | 447.5264 | 392.0319 | 476.2947 | 453.0201 | 486.6485  |
| ENSMUSG Sel1l3   | 1.103518 | 1.212261 | 0.973012 | 3.169933 | 3.086692 | 3.317046  |
| ENSMUSG Pi4k2b   | 46.78573 | 42.30788 | 35.9455  | 35.89444 | 41.39457 | 44.678647 |
| ENSMUSG Olfr109  | 0        | 0        | 0        | 0        | 0        | 0.002011  |
| ENSMUSG Fam114a1 | 11.28694 | 9.662659 | 10.05854 | 9.087251 | 9.794391 | 10.453165 |
| ENSMUSG 1700001C | 5.105473 | 5.835247 | 3.610267 | 6.964578 | 5.720429 | 5.879062  |
| ENSMUSG Il1f5    | 0        | 0        | 0        | 0        | 0        | 0         |
| ENSMUSG Il1rn    | 4.207963 | 4.946983 | 4.979151 | 18.44476 | 23.63509 | 21.871284 |
| ENSMUSG Ly75     | 5.464342 | 4.35353  | 4.709184 | 5.976981 | 6.918479 | 6.671126  |
| ENSMUSG Baz2b    | 9.942038 | 10.24361 | 8.940923 | 9.915234 | 10.53954 | 9.223473  |
| ENSMUSG Hnmt     | 9.335211 | 10.90516 | 8.349682 | 9.543167 | 8.120144 | 9.486566  |
| ENSMUSG Il1f8    | 0        | 0        | 0        | 0        | 0        | 0         |
| ENSMUSG Il1f6    | 0        | 0        | 0        | 0        | 0        | 0         |
| ENSMUSG Dapl1    | 0.689121 | 0.870386 | 1.409128 | 0.833638 | 0.398798 | 1.375129  |
| ENSMUSG Wdsub1   | 14.22305 | 13.10208 | 14.04223 | 11.30373 | 10.93545 | 10.829794 |
| ENSMUSG Itga2b   | 3.509801 | 2.405205 | 5.448474 | 2.016425 | 1.899678 | 1.610518  |
| ENSMUSG Nudc     | 65.49302 | 74.81831 | 72.59253 | 60.32364 | 59.44344 | 61.314987 |
| ENSMUSG Gpatch3  | 2.833701 | 2.412122 | 1.872376 | 2.374226 | 2.181541 | 2.414871  |
| ENSMUSG Tmem222  | 17.62723 | 16.41784 | 18.30199 | 13.80931 | 14.48542 | 12.594619 |
| ENSMUSG Galp     | 0        | 0        | 0        | 0        | 0        | 0         |
| ENSMUSG Bmp2k    | 6.674772 | 6.127711 | 6.163729 | 8.029186 | 8.51943  | 8.930263  |
| ENSMUSG Slc9a1   | 11.31289 | 9.626163 | 10.72082 | 9.643216 | 11.13934 | 11.427643 |
| ENSMUSG Csf3r    | 15.96654 | 13.23291 | 20.11329 | 11.054   | 8.088912 | 7.027994  |
| ENSMUSG Gfm2     | 6.050356 | 6.303003 | 7.106893 | 7.097514 | 6.866081 | 7.155073  |
| ENSMUSG Hexb     | 23.96666 | 22.31169 | 25.73303 | 56.63477 | 55.01208 | 59.801636 |
| ENSMUSG Arhgef28 | 12.16698 | 14.16798 | 10.99074 | 10.33706 | 10.34646 | 9.650648  |
| ENSMUSG Ankra2   | 7.260757 | 7.689726 | 7.365154 | 8.123737 | 8.481766 | 7.062301  |
| ENSMUSG Btf3     | 166.741  | 168.3516 | 167.215  | 152.2042 | 151.3038 | 158.99858 |
| ENSMUSG Thsd7a   | 0.512787 | 0.46008  | 0.443016 | 0.321593 | 0.447541 | 0.647214  |
| ENSMUSG Eml4     | 8.518976 | 8.874849 | 9.204872 | 8.885109 | 8.463315 | 9.12347   |
| ENSMUSG Oas1d    | 0        | 0        | 0        | 0        | 0        | 0         |
| ENSMUSG Srek1    | 10.14725 | 11.13265 | 10.2233  | 9.76303  | 8.996696 | 10.466678 |
| ENSMUSG Polk     | 5.557214 | 5.365319 | 5.020839 | 4.909214 | 4.086006 | 4.148602  |
| ENSMUSG Gm13103  | 0        | 0        | 0        | 0        | 0        | 0         |
| ENSMUSG Tmem116  | 8.648159 | 10.40247 | 10.40026 | 9.732533 | 11.10886 | 8.902816  |
| ENSMUSG Xpnpep3  | 3.166819 | 3.871996 | 3.002067 | 2.665009 | 2.62243  | 2.853731  |
| ENSMUSG Mapkapk5 | 14.70602 | 15.19936 | 15.30041 | 13.07264 | 15.57816 | 12.968362 |
| ENSMUSG Adsl     | 9.93146  | 12.93268 | 8.269934 | 7.757114 | 9.33668  | 8.008955  |
| ENSMUSG Slc25a17 | 31.03482 | 31.93763 | 29.1569  | 28.52234 | 30.52524 | 28.459131 |
| ENSMUSG Brap     | 18.98136 | 21.42093 | 18.71601 | 17.64755 | 17.97379 | 17.534029 |
| ENSMUSG Fam83f   | 0.589978 | 0.500409 | 0.416724 | 1.092935 | 1.020103 | 1.340073  |
| ENSMUSG Mrap2    | 0        | 0.015124 | 0        | 0        | 0        | 0         |
| ENSMUSG Maneal   | 0.145212 | 0.267877 | 0.187211 | 0.112954 | 0.078456 | 0.08848   |
| ENSMUSG Trim46   | 1.654136 | 1.386068 | 1.897127 | 2.09453  | 1.967878 | 2.73618   |
| ENSMUSG Hspa4l   | 8.657103 | 12.78388 | 8.769601 | 11.63374 | 12.03695 | 11.530457 |
| ENSMUSG Lrrc38   | 0        | 0.077487 | 0        | 0        | 0        | 0         |
| ENSMUSG Orc1     | 0.22565  | 0.128081 | 0.306932 | 0.352709 | 0.439124 | 0.495865  |
| ENSMUSG Agbl1    | 0        | 0        | 0        | 0.023244 | 0        | 0         |
| ENSMUSG Laptm5   | 85.27788 | 67.85423 | 90.83277 | 116.2669 | 110.6023 | 121.58127 |
| ENSMUSG Pum1     | 21.93785 | 21.04098 | 22.52491 | 19.00733 | 18.19039 | 19.703289 |
| ENSMUSG Pdpn     | 74.5915  | 63.09965 | 70.49207 | 44.49055 | 47.44416 | 50.70121  |
| ENSMUSG Cc2d1b   | 11.64172 | 10.63783 | 11.20537 | 11.40083 | 11.04166 | 10.335426 |
| ENSMUSG 1700012P | 0        | 0        | 0        | 0        | 0        | 0         |
| ENSMUSG Mfsd8    | 4.499298 | 4.022531 | 4.393579 | 3.492641 | 3.51692  | 3.094685  |
| ENSMUSG Pik4     | 2.210543 | 2.273576 | 2.428178 | 2.886961 | 3.179382 | 3.309449  |
| ENSMUSG Vcpkmt   | 9.290895 | 9.17772  | 8.899415 | 13.52167 | 11.31091 | 10.350478 |
| ENSMUSG Ccdc180  | 1.396965 | 1.557429 | 0.836169 | 1.814361 | 1.72658  | 2.207937  |
| ENSMUSG Eif1     | 199.6024 | 221.6912 | 229.7262 | 164.6033 | 159.1926 | 164.76778 |
| ENSMUSG Exosc3   | 15.6967  | 13.96864 | 14.66419 | 17.3407  | 18.51669 | 15.287971 |
| ENSMUSG Stra6l   | 0.151645 | 0.144426 | 0.15388  | 2.828557 | 2.181688 | 2.800011  |
| ENSMUSG Xpa      | 7.331548 | 7.166044 | 5.716355 | 5.919328 | 5.98916  | 5.212297  |
| ENSMUSG Tmod1    | 36.59607 | 35.59891 | 31.37087 | 16.3588  | 17.50708 | 13.879965 |
| ENSMUSG Il10ra   | 5.571632 | 4.725927 | 9.847253 | 9.143191 | 7.644246 | 8.515598  |

|                   |          |          |          |          |          |           |
|-------------------|----------|----------|----------|----------|----------|-----------|
| ENSMUSG Lce6a     | 0        | 0        | 0        | 0        | 0        | 0         |
| ENSMUSG Apoa1     | 0.054502 | 0        | 0.038684 | 0        | 0        | 0         |
| ENSMUSG Apoc3     | 0        | 0        | 0        | 0        | 0        | 0         |
| ENSMUSG Apoa4     | 0        | 0        | 0        | 0        | 0        | 0         |
| ENSMUSG Dscaml1   | 0.020343 | 0.087245 | 0.021516 | 0.104041 | 0.063903 | 0.136737  |
| ENSMUSG Bace1     | 11.72545 | 11.71358 | 9.872536 | 8.747421 | 8.121949 | 9.111787  |
| ENSMUSG Tagln     | 61.37269 | 54.44059 | 65.99573 | 83.33691 | 91.42923 | 79.27379  |
| ENSMUSG Peli1     | 19.51642 | 19.92428 | 18.33668 | 13.51245 | 14.26299 | 13.299463 |
| ENSMUSG Apc2      | 0.772557 | 0.762252 | 1.128477 | 0.483576 | 0.337629 | 0.556976  |
| ENSMUSG Thap2     | 4.895135 | 5.692789 | 4.504659 | 5.377866 | 4.936013 | 5.500962  |
| ENSMUSG Tbc1d15   | 17.4559  | 15.26954 | 15.20545 | 15.37234 | 16.30192 | 15.657481 |
| ENSMUSG Pcsk4     | 0.589618 | 0.605234 | 0.568255 | 0.429717 | 0.601955 | 0.576208  |
| ENSMUSG Rab21     | 24.25119 | 24.71763 | 23.85448 | 20.32628 | 19.66365 | 19.760988 |
| ENSMUSG 2310011J0 | 20.82864 | 20.69377 | 24.29556 | 17.63093 | 18.2397  | 19.84185  |
| ENSMUSG Rfc3      | 4.999181 | 5.337495 | 5.734594 | 4.897986 | 6.727091 | 5.715647  |
| ENSMUSG Zfp944    | 2.517521 | 3.194943 | 2.894892 | 3.13801  | 3.122771 | 2.233457  |
| ENSMUSG Cerkl     | 0.216663 | 0.291234 | 0.091845 | 0.436894 | 0.719594 | 0.600308  |
| ENSMUSG Heg1      | 90.21123 | 85.05485 | 78.67325 | 60.04803 | 59.29008 | 66.661876 |
| ENSMUSG Sowaha    | 0.492301 | 0.580383 | 0.380038 | 0.328503 | 0.474497 | 0.400115  |
| ENSMUSG Lacc1     | 4.036358 | 3.937292 | 4.066669 | 4.126049 | 4.01971  | 4.379664  |
| ENSMUSG P2ry4     | 0        | 0        | 0        | 0        | 0.010484 | 0         |
| ENSMUSG Akr1b3    | 57.75733 | 55.02689 | 63.48472 | 51.99465 | 56.9702  | 63.185688 |
| ENSMUSG Igsf5     | 0.20588  | 0.130543 | 0.102282 | 0.158118 | 0        | 0.113626  |
| ENSMUSG Arhgap30  | 11.80286 | 10.13611 | 15.94338 | 21.80854 | 21.14521 | 22.287416 |
| ENSMUSG Gm8369    | 0.279397 | 0.300892 | 0.68771  | 1.256431 | 0.745279 | 0.876381  |
| ENSMUSG Nid1      | 32.83712 | 31.37001 | 36.51083 | 24.6167  | 25.9074  | 23.321686 |
| ENSMUSG Susd5     | 0.128624 | 0.03802  | 0.066408 | 0.043216 | 0.053955 | 0.112415  |
| ENSMUSG Btbd18    | 0.05546  | 0        | 0        | 0.016955 | 0        | 0         |
| ENSMUSG Pag1      | 12.29107 | 10.91655 | 12.24553 | 8.490309 | 9.532996 | 7.144946  |
| ENSMUSG Cdo1      | 87.22048 | 91.33252 | 99.07677 | 72.73534 | 83.06228 | 64.239477 |
| ENSMUSG Polr2f    | 18.32009 | 21.18737 | 23.76582 | 19.54539 | 19.38711 | 19.207916 |
| ENSMUSG Gmppa     | 15.32482 | 16.64512 | 17.46801 | 24.5884  | 24.68881 | 23.932139 |
| ENSMUSG Klrc3     | 1.089406 | 0.735678 | 2.377207 | 0.880101 | 0.384398 | 1.045704  |
| ENSMUSG Klra9     | 0.175609 | 0        | 0.125546 | 0.154424 | 0        | 0         |
| ENSMUSG 1700088E  | 2.679507 | 4.196341 | 2.595536 | 3.168392 | 3.918468 | 3.785981  |
| Mus_musc Mus_musc | 0.66378  | 1.704019 | 1.507204 | 1.317038 | 1.305796 | 1.774082  |
| ENSMUSG Slc1a1    | 9.276043 | 8.233936 | 7.665627 | 7.669601 | 7.563788 | 8.466345  |
| ENSMUSG Gm49450   | 0        | 17.62553 | 15.54567 | 9.919397 | 18.07047 | 0         |
| ENSMUSG Ehbp1l1   | 9.485897 | 9.086422 | 11.16553 | 15.02435 | 11.16626 | 13.557129 |
| ENSMUSG Fam89b    | 9.712532 | 9.052147 | 9.44704  | 13.23649 | 7.002578 | 12.326935 |
| ENSMUSG Ubac1     | 12.03941 | 10.65198 | 9.9359   | 11.3619  | 10.21299 | 10.362167 |
| ENSMUSG Map1b     | 4.079456 | 3.751697 | 2.472662 | 3.489515 | 3.585295 | 3.948517  |
| Mus_musc Mus_musc | 2.303596 | 2.197177 | 1.480863 | 0.738161 | 0.931416 | 1.054018  |
| Mus_musc Mus_musc | 0.132958 | 0.15178  | 0.156508 | 0.376239 | 0.034917 | 0.133432  |
| Mus_musc Mus_musc | 1.074589 | 1.104877 | 1.586864 | 0.429455 | 1.324422 | 1.486787  |
| Mus_musc Mus_musc | 0.413111 | 0.253041 | 0.143882 | 0.265448 | 0.364683 | 0         |
| Mus_musc Mus_musc | 0.247377 | 0        | 0.33677  | 0        | 0        | 0         |
| Mus_musc Mus_musc | 0        | 0        | 0.254445 | 0        | 0        | 0         |
| ENSMUSG Insrr     | 0.080932 | 0.094939 | 0.048146 | 0.025853 | 0.010979 | 0.092743  |
| ENSMUSG Cabp5     | 0        | 0        | 0        | 0        | 0        | 0         |
| ENSMUSG Gm13723   | 0        | 0        | 0        | 0        | 0        | 0         |
| ENSMUSG Vmn2r47   | 0        | 0        | 0        | 0        | 0        | 0         |
| ENSMUSG Gm8922    | 0        | 0        | 0        | 0.108823 | 0.397264 | 0.145018  |
| ENSMUSG 1700047I1 | 11.75328 | 9.66658  | 9.565918 | 8.955833 | 8.083018 | 7.704138  |
| Mus_musc Mus_musc | 0        | 0        | 0        | 0.101158 | 0        | 0         |
| ENSMUSG Pla2g4b   | 0.044211 | 0        | 0        | 0.045121 | 0        | 0.170246  |
| ENSMUSG Ube2dnl2  | 0        | 0        | 0        | 0        | 0        | 0         |
| ENSMUSG Stra8     | 0.246641 | 0        | 0        | 0        | 0        | 0.05496   |
| ENSMUSG Slc13a4   | 2.306032 | 2.462059 | 2.513979 | 2.686282 | 3.31127  | 2.152835  |
| ENSMUSG Mtpn      | 54.8163  | 55.94888 | 51.03478 | 63.31723 | 60.06771 | 62.441769 |
| ENSMUSG Slc23a4   | 0.151407 | 0.171627 | 0.194407 | 0.203299 | 0.146387 | 0.250934  |
| ENSMUSG Hoxa1     | 0.469953 | 0.508714 | 0.450747 | 0.343776 | 0.33356  | 0.261035  |
| Mus_musc Mus_musc | 0        | 0        | 0        | 0        | 0.378979 | 0         |
| Mus_musc Mus_musc | 0.413439 | 0.296051 | 0.358272 | 0.328389 | 0.147544 | 0.714831  |

|                   |          |          |          |          |          |           |
|-------------------|----------|----------|----------|----------|----------|-----------|
| Mus_musc Mus_musc | 0        | 0        | 0        | 0.178784 | 0.07928  | 0         |
| ENSMUSG Kcng4     | 0.021145 | 0.024326 | 0.041612 | 0.041149 | 0.091875 | 0.065477  |
| ENSMUSG Vwa8      | 8.922649 | 8.713072 | 7.691816 | 6.985784 | 6.731624 | 7.263394  |
| ENSMUSG Atp1b4    | 0        | 0        | 0        | 0.009776 | 0        | 0         |
| ENSMUSG Trappc9   | 9.350786 | 8.025833 | 8.647575 | 6.670252 | 7.402458 | 7.573698  |
| ENSMUSG Capns2    | 0.056129 | 0.020575 | 0.003026 | 0.377122 | 0.129477 | 0.067443  |
| Mus_musc Mus_musc | 14.55735 | 11.94713 | 5.306015 | 758.8028 | 1158.793 | 781.761   |
| Mus_musc Mus_musc | 0.041836 | 0        | 0        | 0.945266 | 1.091647 | 0.730336  |
| Mus_musc Mus_musc | 0.910565 | 0.766994 | 0.503485 | 171.6058 | 52.07589 | 177.17485 |
| Mus_musc Mus_musc | 0.69108  | 0        | 0        | 2.708673 | 15.70989 | 27.850513 |
| Mus_musc Mus_musc | 0        | 0.044752 | 0        | 19.40115 | 22.75397 | 18.686186 |
| Mus_musc Mus_musc | 0        | 0        | 0        | 1.116907 | 0        | 0         |
| Mus_musc Mus_musc | 0        | 0.082324 | 0        | 16.25722 | 21.03468 | 18.152478 |
| Mus_musc Mus_musc | 0.776728 | 0.28843  | 0.060522 | 42.80495 | 16.95134 | 23.213575 |
| Mus_musc Mus_musc | 1.249678 | 1.643208 | 0.40445  | 27.4357  | 49.71507 | 89.882225 |
| ENSMUSG Cbl       | 10.22614 | 9.811354 | 9.506531 | 10.85007 | 11.34501 | 11.492169 |
| ENSMUSG Ube2f     | 9.342943 | 11.89041 | 12.03902 | 12.32184 | 9.83571  | 11.322239 |
| ENSMUSG Wbp2      | 77.26727 | 76.00374 | 72.32355 | 62.03943 | 60.21036 | 63.847816 |
| ENSMUSG Gtf2h5    | 15.09533 | 15.95585 | 15.37753 | 13.26611 | 14.11216 | 12.740134 |
| ENSMUSG Smc4      | 14.31365 | 13.65587 | 13.79187 | 16.91597 | 15.82157 | 17.957097 |
| ENSMUSG Khlh10    | 0        | 0.073001 | 0        | 0.157828 | 0.129676 | 0.027304  |
| ENSMUSG Fkbp10    | 9.030931 | 6.961703 | 8.761612 | 6.395168 | 6.559007 | 6.71473   |
| ENSMUSG Jup       | 171.8279 | 154.697  | 158.7279 | 108.5477 | 104.1895 | 110.10043 |
| ENSMUSG Mc2r      | 0        | 0        | 0        | 0        | 0        | 0         |
| ENSMUSG Sprr4     | 0        | 0        | 0        | 0        | 0        | 0         |
| ENSMUSG Il13ra1   | 11.64612 | 13.53442 | 12.55671 | 14.18146 | 14.81471 | 15.352643 |
| Mus_musc Mus_musc | 0        | 0.308619 | 0        | 0        | 0        | 0         |
| Mus_musc Mus_musc | 0.249638 | 0.269562 | 0        | 0.269941 | 0.282648 | 0.343204  |
| Mus_musc Mus_musc | 1.929234 | 1.331224 | 2.475281 | 2.508374 | 2.156624 | 2.024587  |
| Mus_musc Mus_musc | 0        | 0        | 0        | 0.324448 | 0.203105 | 0         |
| ENSMUSG Lnpk      | 4.731799 | 5.231465 | 4.71571  | 4.045388 | 4.629537 | 3.5063    |
| Mus_musc Mus_musc | 0        | 0.092738 | 0        | 0        | 0        | 0         |
| Mus_musc Mus_musc | 0        | 0.198842 | 0        | 0        | 0.43478  | 0         |
| Mus_musc Mus_musc | 0        | 0        | 0        | 0.113611 | 0        | 0.25405   |
| Mus_musc Mus_musc | 0        | 0        | 0        | 0        | 0        | 0         |
| Mus_musc Mus_musc | 0.558962 | 0.461588 | 0.293228 | 0.073622 | 0.343041 | 0         |
| Mus_musc Mus_musc | 0        | 0.426201 | 0.297976 | 0.250429 | 0.257649 | 0         |
| Mus_musc Mus_musc | 0.356004 | 0.543404 | 0.397119 | 0.231148 | 0.28902  | 0.17364   |
| Mus_musc Mus_musc | 0        | 0        | 0        | 0.213729 | 0        | 0         |
| ENSMUSG Rps6kl1   | 0.788609 | 0.579691 | 0.780398 | 0.284188 | 0.476509 | 0.621157  |
| ENSMUSG Lpl       | 55.15929 | 57.80452 | 48.09403 | 63.37463 | 78.78134 | 71.755907 |
| ENSMUSG Etnppl    | 0        | 0        | 0.033991 | 0        | 0        | 0         |
| ENSMUSG Lhx9      | 0        | 0        | 0        | 0        | 0        | 0         |
| ENSMUSG Ccdc97    | 13.416   | 13.46674 | 15.6998  | 13.0085  | 12.58795 | 12.532411 |
| ENSMUSG Gm13279   | 0        | 0        | 0        | 0        | 0        | 0         |
| ENSMUSG Axl       | 46.13239 | 42.05896 | 44.96111 | 37.07782 | 43.9587  | 37.574707 |
| ENSMUSG Tgfb1     | 50.31884 | 41.32955 | 50.76668 | 49.12305 | 50.08096 | 50.837584 |
| ENSMUSG 4930595D  | 0        | 0        | 0        | 0.011913 | 0        | 0         |
| ENSMUSG Krt27     | 0        | 0        | 0        | 0        | 0        | 0         |
| ENSMUSG Ccdc13    | 0.877409 | 0.895637 | 0.592726 | 0.969745 | 1.233648 | 1.169706  |
| ENSMUSG Setdb1    | 9.340746 | 9.384073 | 9.427769 | 9.343271 | 8.241805 | 8.983054  |
| ENSMUSG Clcn4     | 15.00635 | 16.32978 | 15.64047 | 15.94189 | 16.93398 | 15.917269 |
| ENSMUSG Vmn2r88   | 0        | 0        | 0        | 0        | 0        | 0         |
| ENSMUSG Krit1     | 10.49178 | 12.64747 | 13.54647 | 10.57706 | 11.22081 | 9.484835  |
| ENSMUSG Hyal1     | 15.88965 | 15.63422 | 16.65079 | 9.45797  | 10.29585 | 13.038742 |
| ENSMUSG Tusc2     | 21.09555 | 16.51443 | 17.77041 | 15.6023  | 17.6191  | 17.783731 |
| ENSMUSG Nprl2     | 9.049463 | 10.08084 | 10.22202 | 7.921864 | 7.719026 | 9.93456   |
| ENSMUSG Thap8     | 0.079718 | 0.057577 | 0.163649 | 0        | 0.102958 | 0.054656  |
| ENSMUSG Gm8220    | 0        | 0        | 0        | 0        | 0.043779 | 0         |
| ENSMUSG Sox2      | 5.38344  | 6.053244 | 3.455676 | 7.340656 | 6.534959 | 5.652288  |
| ENSMUSG Gm9732    | 0        | 0        | 0        | 0.06389  | 0.057307 | 0         |
| ENSMUSG Vmn1r36   | 0        | 0        | 0        | 0        | 0        | 0         |
| ENSMUSG Olfr279   | 0        | 0        | 0        | 0        | 0        | 0         |
| ENSMUSG Fhod1     | 22.31831 | 20.64209 | 24.81174 | 18.05168 | 16.92365 | 15.334773 |

|                    |          |          |          |          |          |           |
|--------------------|----------|----------|----------|----------|----------|-----------|
| ENSMUSG Pcd2       | 1.375444 | 1.192749 | 1.264609 | 1.350402 | 0.986559 | 1.309431  |
| ENSMUSG Dll1       | 13.92891 | 12.81858 | 20.98226 | 6.629674 | 7.530909 | 6.821408  |
| ENSMUSG Nol3       | 4.628789 | 4.969363 | 5.707469 | 3.836428 | 3.863079 | 3.592681  |
| Mus_musc Mus_musc  | 0.239559 | 0        | 0        | 0        | 0        | 0         |
| Mus_musc Mus_musc  | 2.535734 | 9.575703 | 1.315237 | 3.092566 | 0        | 0         |
| ENSMUSG Pou3f1     | 0.028774 | 0.029106 | 0.022121 | 0        | 0.014503 | 0         |
| Mus_musc Mus_musc  | 0.363559 | 0.51118  | 0.26952  | 0        | 0.910981 | 0         |
| Mus_musc Mus_musc  | 1.95962  | 1.487294 | 0.925361 | 0.144618 | 1.112455 | 1.382947  |
| Mus_musc Mus_musc  | 0.854008 | 1.160281 | 1.005471 | 0.902503 | 0.768855 | 0.597398  |
| ENSMUSG Abhd12b    | 0        | 0.060333 | 0        | 0.1149   | 0.034499 | 0.026461  |
| ENSMUSG Kcne1l     | 0.1048   | 0        | 0        | 0.032706 | 0        | 0.035811  |
| Mus_musc Mus_musc  | 0.116532 | 0.20326  | 0.253759 | 0.152812 | 0        | 0.093254  |
| ENSMUSG Mettl4     | 3.457614 | 4.39763  | 3.395305 | 3.593407 | 3.132922 | 3.347762  |
| ENSMUSG Gnaz       | 0.47705  | 1.024749 | 0.97011  | 1.301684 | 1.094176 | 1.376151  |
| ENSMUSG Ginm1      | 43.32335 | 43.25899 | 49.78476 | 35.59041 | 34.13187 | 31.398673 |
| ENSMUSG Bahd1      | 11.24351 | 10.07988 | 10.48224 | 9.510641 | 9.516143 | 10.934592 |
| ENSMUSG Magi2      | 0.993854 | 0.497015 | 0.898784 | 0.742525 | 0.262325 | 0.730865  |
| ENSMUSG Muc2       | 0.014679 | 0.433112 | 0.074653 | 1.558687 | 0.336192 | 0.220168  |
| ENSMUSG Ppp1r1b    | 3.127674 | 6.842473 | 4.372411 | 8.482347 | 7.75796  | 7.140465  |
| ENSMUSG Tspan4     | 82.32252 | 68.97028 | 78.00924 | 42.49409 | 43.42073 | 41.582032 |
| ENSMUSG Cd151      | 143.6006 | 132.8972 | 140.3363 | 98.91865 | 100.4394 | 104.49447 |
| ENSMUSG Chid1      | 4.899219 | 5.001833 | 4.938354 | 7.170504 | 8.002071 | 8.25311   |
| ENSMUSG Tktl2      | 0        | 0        | 0        | 0        | 0        | 0         |
| ENSMUSG Tyw1       | 7.455113 | 7.450016 | 7.069118 | 6.876654 | 7.09992  | 7.210376  |
| ENSMUSG Tcim       | 40.12258 | 51.30471 | 49.33554 | 25.83007 | 27.78168 | 27.005072 |
| ENSMUSG Olfr1001-r | 0        | 0        | 0        | 0        | 0        | 0         |
| ENSMUSG Olfr1251   | 0        | 0        | 0        | 0        | 0        | 0         |
| Mus_musc Mus_musc  | 0.130587 | 0.366741 | 0.138964 | 0.340438 | 0.140285 | 0.084055  |
| ENSMUSG Slc22a1    | 0.097284 | 0.727716 | 0.337695 | 0.521259 | 0.123019 | 0.106151  |
| ENSMUSG Slc22a3    | 0.591589 | 0.520355 | 0.59441  | 1.004417 | 0.90252  | 1.23695   |
| ENSMUSG Agpat4     | 26.92089 | 22.32427 | 27.90171 | 16.99506 | 18.53889 | 18.626921 |
| ENSMUSG Prkn       | 1.324743 | 0.930876 | 1.021321 | 0.918384 | 0.517398 | 0.499201  |
| Mus_musc Mus_musc  | 3.169064 | 2.354925 | 4.37868  | 0.729732 | 1.320772 | 1.048272  |
| ENSMUSG Ankrd23    | 1.525407 | 2.488189 | 1.946628 | 2.630995 | 1.961138 | 2.15746   |
| ENSMUSG Slc22a27   | 0        | 0        | 0        | 0        | 0        | 0         |
| ENSMUSG Epp13      | 0        | 0        | 0        | 0.130376 | 0.158796 | 0         |
| ENSMUSG Gm9049     | 0.462583 | 0.684942 | 0.484767 | 0.432119 | 0.453776 | 0.373792  |
| ENSMUSG Rxfp2      | 0        | 0        | 0        | 0        | 0        | 0.019732  |
| ENSMUSG Gm45808    | 0        | 0        | 0        | 0.012665 | 0        | 0         |
| ENSMUSG Zfp128     | 1.278162 | 1.270013 | 1.182685 | 1.219974 | 1.284886 | 1.009325  |
| ENSMUSG Kif13a     | 28.48863 | 27.51137 | 25.15901 | 18.96923 | 19.00101 | 19.834226 |
| ENSMUSG Vars2      | 6.45452  | 6.11042  | 5.31417  | 6.396085 | 5.905825 | 6.793483  |
| ENSMUSG Agbl3      | 2.735779 | 3.461071 | 2.125732 | 2.069899 | 1.930861 | 2.305866  |
| ENSMUSG Dek        | 39.21341 | 35.05653 | 34.62961 | 33.34234 | 35.15029 | 36.160836 |
| ENSMUSG Tmem248    | 22.11606 | 21.71585 | 22.11055 | 21.0821  | 20.72461 | 21.390253 |
| ENSMUSG Lins1      | 1.747113 | 1.916928 | 2.268862 | 1.75148  | 1.754567 | 1.712143  |
| ENSMUSG Myh7       | 19.36222 | 24.96381 | 18.38681 | 17.74403 | 15.04696 | 22.245798 |
| ENSMUSG Clca4a     | 0        | 0.012431 | 0        | 0.013845 | 0        | 0         |
| ENSMUSG Gm20219    | 1.791114 | 1.611431 | 2.054458 | 1.307384 | 1.05145  | 1.582637  |
| ENSMUSG Rhox3a     | 0        | 0        | 0        | 0        | 0        | 0         |
| ENSMUSG Tcp11l2    | 22.64557 | 20.08608 | 18.38909 | 19.24647 | 19.29837 | 18.179148 |
| ENSMUSG Rfx4       | 0.050869 | 0        | 0        | 0.112121 | 0.038987 | 0.139682  |
| ENSMUSG Rhox1      | 0        | 0        | 0        | 0        | 0        | 0         |
| ENSMUSG Olfr894    | 0        | 0        | 0        | 0        | 0        | 0         |
| ENSMUSG A630095E:  | 0        | 0        | 0        | 0        | 0        | 0         |
| ENSMUSG Nuak1      | 7.251848 | 7.495773 | 8.404923 | 6.038584 | 7.094751 | 6.077271  |
| ENSMUSG Eif3g      | 51.53479 | 54.55507 | 54.77199 | 49.0298  | 46.97854 | 53.243126 |
| ENSMUSG Cry1       | 13.80217 | 14.11074 | 13.59931 | 10.22516 | 10.66334 | 10.689901 |
| ENSMUSG Prl2a1     | 0        | 0        | 0        | 0        | 0        | 0         |
| ENSMUSG Masp1      | 0.474995 | 0.636302 | 0.590714 | 0.669246 | 0.726064 | 0.860807  |
| ENSMUSG Eif4a2     | 174.385  | 198.5307 | 185.7936 | 151.1739 | 156.1648 | 142.37858 |
| ENSMUSG St6gal1    | 10.9294  | 11.26647 | 10.02992 | 21.1766  | 20.72344 | 18.364956 |
| ENSMUSG Robo1      | 2.726518 | 2.769181 | 2.173163 | 1.594699 | 1.899384 | 1.216146  |
| ENSMUSG Rfc4       | 2.817867 | 2.85207  | 2.634353 | 4.174438 | 3.413689 | 3.220096  |

|          |          |          |          |          |          |          |           |
|----------|----------|----------|----------|----------|----------|----------|-----------|
| Mus_musc | Mus_musc | 5.700816 | 6.011361 | 1.236346 | 146.1469 | 31.23178 | 42.309952 |
| ENSMUSG  | Mrpl39   | 9.492555 | 9.140066 | 8.620273 | 9.095909 | 8.579303 | 9.364996  |
| ENSMUSG  | Glis3    | 1.755139 | 2.106734 | 1.226412 | 1.893761 | 2.311372 | 1.994365  |
| ENSMUSG  | Rnf157   | 1.037226 | 0.883421 | 1.458453 | 1.111869 | 1.243374 | 1.098556  |
| ENSMUSG  | Nop14    | 9.388719 | 9.789687 | 10.1773  | 8.718814 | 9.052886 | 9.76269   |
| ENSMUSG  | Ago2     | 11.25532 | 11.01914 | 9.864197 | 10.52167 | 10.85717 | 10.677264 |
| ENSMUSG  | Zcchc12  | 0.214563 | 0.219489 | 0.292197 | 0.257183 | 0.28382  | 0.182174  |
| ENSMUSG  | Sh2b2    | 1.625356 | 1.45336  | 1.334883 | 2.7241   | 2.054087 | 2.896811  |
| ENSMUSG  | Neur12   | 1.870066 | 1.355889 | 2.142742 | 1.642401 | 1.607426 | 1.550526  |
| ENSMUSG  | Lrrc32   | 17.47989 | 16.63555 | 20.77892 | 9.962953 | 11.51296 | 11.877409 |
| ENSMUSG  | Shc3     | 0        | 0        | 0        | 0        | 0.03644  | 0         |
| ENSMUSG  | Olf181   | 0        | 0        | 0        | 0        | 0        | 0         |
| ENSMUSG  | Heca     | 25.17557 | 25.4465  | 23.77411 | 18.96792 | 18.91203 | 18.747038 |
| ENSMUSG  | Slc39a5  | 0.016528 | 0        | 0        | 0        | 0        | 0         |
| ENSMUSG  | Acsm3    | 0.36344  | 0.48347  | 0.199646 | 0.240676 | 0.229658 | 0.292454  |
| ENSMUSG  | Oat      | 96.24502 | 103.8829 | 95.1113  | 86.72128 | 96.08176 | 102.32731 |
| ENSMUSG  | Chst15   | 15.13519 | 12.31438 | 12.24483 | 9.592325 | 10.41117 | 8.751129  |
| ENSMUSG  | Pcdha2   | 0        | 0        | 0        | 0        | 0        | 0         |
| ENSMUSG  | Rab5c    | 108.8601 | 104.8474 | 120.529  | 99.68651 | 98.08374 | 106.2572  |
| ENSMUSG  | Gm20661  | 0.131405 | 0.00642  | 0.060553 | 0.22676  | 0.171197 | 0.247514  |
| ENSMUSG  | Styx1    | 0.655088 | 0.796037 | 0.410701 | 1.495046 | 0.941612 | 1.680954  |
| ENSMUSG  | Mdh2     | 73.73357 | 74.99127 | 73.55351 | 83.52393 | 85.2916  | 90.931339 |
| ENSMUSG  | Scgb2b19 | 0        | 0        | 0        | 0        | 0        | 0         |
| ENSMUSG  | Olf488   | 0        | 0        | 0        | 0        | 0        | 0         |
| ENSMUSG  | Gm21750  | 0        | 0        | 0        | 0        | 0        | 0         |
| ENSMUSG  | Cts6     | 0        | 0        | 0        | 0        | 0        | 0         |
| ENSMUSG  | Greb1    | 1.708053 | 1.814296 | 1.591147 | 0.894271 | 0.884062 | 0.916081  |
| ENSMUSG  | Olf583   | 0        | 0        | 0        | 0        | 0        | 0         |
| ENSMUSG  | Ppfbp2   | 13.34003 | 13.79167 | 12.28769 | 12.17046 | 11.11887 | 11.66994  |
| ENSMUSG  | Sbf1     | 17.58274 | 15.75726 | 17.50595 | 16.32702 | 16.94178 | 16.503641 |
| ENSMUSG  | Gm16405  | 0        | 0        | 0        | 0        | 0        | 0         |
| ENSMUSG  | Gm17093  | 0        | 0        | 0        | 0        | 0        | 0         |
| ENSMUSG  | Rasgrp3  | 18.88743 | 21.36031 | 19.1222  | 19.61941 | 19.08375 | 20.390442 |
| ENSMUSG  | Ces1a    | 0        | 0        | 0        | 0        | 0        | 0         |
| ENSMUSG  | Grxcr2   | 0        | 0        | 0        | 0        | 0        | 0         |
| ENSMUSG  | Gm10542  | 0        | 0        | 0        | 0        | 0        | 0         |
| ENSMUSG  | Spink11  | 0        | 0        | 0        | 0        | 0        | 0         |
| ENSMUSG  | Olf93    | 0        | 0        | 0        | 0        | 0        | 0         |
| ENSMUSG  | Gm17349  | 0        | 0        | 0        | 0        | 0        | 0         |
| ENSMUSG  | Fbn2     | 0.123189 | 0.17507  | 0.081631 | 0.10064  | 0.152899 | 0.132393  |
| ENSMUSG  | Prss38   | 0        | 0        | 0        | 0.083998 | 0        | 0         |
| ENSMUSG  | Akap12   | 33.94215 | 31.12518 | 31.98748 | 18.41535 | 17.64136 | 18.505322 |
| ENSMUSG  | Sct      | 0        | 0        | 0.056312 | 0.071692 | 0        | 0         |
| ENSMUSG  | Zfp219   | 14.8856  | 15.65408 | 16.23088 | 16.12834 | 15.4493  | 16.553508 |
| ENSMUSG  | Pptc7    | 15.70349 | 16.10435 | 15.0573  | 11.84965 | 11.71186 | 12.727132 |
| ENSMUSG  | Pln      | 1.094512 | 5.805999 | 1.011623 | 2.424616 | 1.471474 | 1.571256  |
| ENSMUSG  | Trappc1  | 16.12382 | 14.44488 | 17.21521 | 17.91367 | 18.85073 | 21.549947 |
| ENSMUSG  | Prkcsb   | 33.33359 | 33.05642 | 33.51236 | 38.99757 | 38.07685 | 41.518648 |
| ENSMUSG  | Grin2b   | 0.0377   | 0.012994 | 0.008201 | 0.002105 | 0        | 0.004501  |
| ENSMUSG  | Emp1     | 127.4921 | 122.803  | 121.2955 | 73.46062 | 72.76455 | 78.736012 |
| ENSMUSG  | Dusp16   | 13.57019 | 16.1506  | 13.42954 | 10.16679 | 9.657617 | 9.762203  |
| ENSMUSG  | Lrp6     | 20.45622 | 22.1933  | 18.85183 | 14.34442 | 15.24723 | 14.739401 |
| ENSMUSG  | Bcl2l14  | 1.825859 | 1.32747  | 1.092625 | 1.976484 | 1.937436 | 2.015894  |
| ENSMUSG  | Fam234b  | 5.398469 | 5.072246 | 5.43155  | 4.598964 | 4.585787 | 4.476171  |
| ENSMUSG  | Gsg1     | 0.29593  | 0.186448 | 0.183982 | 0.210747 | 0.19638  | 0         |
| ENSMUSG  | Gprc5d   | 0        | 0        | 0        | 0        | 0        | 0.040991  |
| ENSMUSG  | Ddx47    | 27.6186  | 26.16567 | 27.73284 | 24.52802 | 22.22213 | 22.945953 |
| Mus_musc | Mus_musc | 0        | 0        | 0        | 0        | 0        | 0.309088  |
| ENSMUSG  | Slc12a2  | 31.4347  | 32.53146 | 27.41835 | 28.74641 | 27.42861 | 25.725857 |
| ENSMUSG  | Nod1     | 23.63251 | 23.4697  | 31.69884 | 22.50898 | 18.61942 | 18.648334 |
| ENSMUSG  | Smim3    | 7.678771 | 8.935081 | 9.272075 | 7.216188 | 8.165154 | 10.076398 |
| ENSMUSG  | Kmt2c    | 12.58405 | 13.45306 | 12.402   | 10.98469 | 11.99356 | 10.712512 |
| ENSMUSG  | Dbil5    | 0.496674 | 0.098339 | 0        | 0.194526 | 0.052055 | 0.085277  |
| ENSMUSG  | Dexi     | 6.17481  | 7.378239 | 12.32406 | 8.226347 | 7.281397 | 8.596297  |



|                   |          |          |          |          |          |           |
|-------------------|----------|----------|----------|----------|----------|-----------|
| ENSMUSG Mroh5     | 0.02624  | 0.03537  | 0.016957 | 0        | 0.020249 | 0         |
| ENSMUSG Gad1      | 0.145493 | 0.208444 | 0.053576 | 0.02334  | 0.011407 | 0.05984   |
| ENSMUSG Ccdc173   | 1.476312 | 1.482591 | 1.305774 | 1.971129 | 1.708883 | 1.264333  |
| ENSMUSG Faap20    | 8.178212 | 8.604437 | 9.849284 | 10.52251 | 9.824171 | 10.430834 |
| ENSMUSG Gm10563   | 0        | 0        | 0        | 0        | 0        | 0         |
| ENSMUSG Tmem88b   | 0.196591 | 0.095686 | 0.119389 | 0.257339 | 0.069062 | 0.051366  |
| ENSMUSG Lrp12     | 5.254141 | 5.50828  | 5.126177 | 9.921804 | 11.19293 | 12.291886 |
| ENSMUSG Dpys      | 0.022875 | 0        | 0        | 0.047703 | 0        | 0.130014  |
| ENSMUSG Oxr1      | 32.96602 | 33.92355 | 32.5103  | 27.36929 | 26.18814 | 25.436765 |
| ENSMUSG Zfpm2     | 1.024566 | 0.834218 | 0.78743  | 0.690265 | 0.653217 | 0.658833  |
| ENSMUSG Dcaf13    | 12.28169 | 12.85478 | 12.90499 | 14.29305 | 15.30739 | 14.843678 |
| ENSMUSG Dcstamp   | 0.10329  | 0.122937 | 0.119025 | 2.932795 | 2.130369 | 3.280392  |
| ENSMUSG Ano4      | 0        | 0.043328 | 0        | 0        | 0        | 0         |
| ENSMUSG Nkx6-1    | 0        | 0        | 0        | 0.011701 | 0        | 0         |
| ENSMUSG Ubd       | 0.152875 | 0        | 1.252297 | 1.856425 | 1.022297 | 1.51485   |
| ENSMUSG Fam124a   | 2.620074 | 2.640302 | 2.350625 | 2.113333 | 1.990572 | 2.02315   |
| ENSMUSG Slc24a5   | 0.393371 | 0.367418 | 0.575089 | 0.459559 | 0.247769 | 0.35888   |
| ENSMUSG Heatr5a   | 7.65169  | 8.110629 | 7.738148 | 8.641417 | 9.583032 | 9.028294  |
| ENSMUSG Cdk7      | 9.388762 | 9.97261  | 9.05214  | 9.609082 | 9.066585 | 8.630719  |
| ENSMUSG Lcn11     | 0        | 0        | 0        | 0        | 0        | 0         |
| ENSMUSG Dyt1      | 0        | 0        | 0.071138 | 0        | 0        | 0         |
| ENSMUSG Olfr1347  | 0        | 0        | 0        | 0        | 0        | 0         |
| ENSMUSG Exph5     | 8.306826 | 8.650696 | 6.053342 | 4.690052 | 5.282826 | 5.009297  |
| ENSMUSG Hid1      | 8.945872 | 8.955985 | 6.913166 | 13.13416 | 12.81854 | 14.313019 |
| ENSMUSG Samd13    | 0.090915 | 0        | 0.353162 | 0.13779  | 0        | 0         |
| ENSMUSG Zfp3      | 2.278273 | 2.190278 | 1.604689 | 2.324859 | 2.092929 | 2.364841  |
| ENSMUSG Olfr13    | 0        | 0        | 0        | 0        | 0        | 0         |
| ENSMUSG Ccdc169   | 0        | 0        | 0        | 0.179414 | 0        | 0.053745  |
| ENSMUSG Vps13a    | 6.877106 | 7.275843 | 5.548947 | 5.370951 | 5.233977 | 5.650159  |
| ENSMUSG B230219D  | 34.87025 | 39.02044 | 33.82365 | 28.73522 | 29.68364 | 29.162479 |
| ENSMUSG Ccdc130   | 4.206073 | 4.550414 | 5.180629 | 3.718875 | 3.506813 | 4.07001   |
| ENSMUSG Togaram2  | 3.899697 | 5.100568 | 2.506983 | 6.121339 | 5.982815 | 6.992307  |
| ENSMUSG Mri1      | 2.905358 | 1.715575 | 1.85218  | 2.75385  | 2.28003  | 2.469037  |
| ENSMUSG Basp1     | 3.411427 | 3.120957 | 2.52876  | 10.39632 | 11.8997  | 10.847528 |
| ENSMUSG Tmem89    | 0        | 0        | 0        | 0        | 0        | 0         |
| ENSMUSG Col7a1    | 0.809308 | 0.647498 | 0.673818 | 0.451445 | 0.568393 | 0.667381  |
| ENSMUSG Uqcrc1    | 72.01824 | 74.13295 | 74.39109 | 71.35876 | 77.29565 | 82.740919 |
| ENSMUSG Arhgef9   | 1.146142 | 1.647163 | 0.868103 | 0.875909 | 0.875542 | 0.856933  |
| ENSMUSG Cnksr2    | 0.495213 | 0.5842   | 0.443421 | 0.312037 | 0.417666 | 0.502034  |
| ENSMUSG Pacs2     | 15.57838 | 14.60866 | 16.11332 | 14.18112 | 15.01688 | 15.051272 |
| ENSMUSG Pcnx      | 25.12616 | 27.79257 | 27.0331  | 20.19189 | 20.05766 | 18.510604 |
| ENSMUSG Wdr37     | 11.97479 | 11.49396 | 11.35117 | 9.202923 | 9.277102 | 8.996234  |
| ENSMUSG Mta1      | 23.68945 | 23.43044 | 26.25572 | 18.95578 | 20.93498 | 20.666671 |
| ENSMUSG Gm9745    | 0        | 0        | 0        | 0        | 0        | 0         |
| ENSMUSG Gtpbp4    | 5.016401 | 5.218728 | 4.370572 | 4.11256  | 3.651513 | 4.280826  |
| ENSMUSG Ppia      | 132.8256 | 259.354  | 291.8569 | 196.0708 | 163.933  | 375.78746 |
| ENSMUSG 2900055J2 | 0.155522 | 0        | 0.070098 | 0        | 0.14641  | 0         |
| ENSMUSG Lrrtm2    | 0        | 0.009506 | 0.01002  | 0.016403 | 0        | 0         |
| ENSMUSG Id3       | 133.2034 | 120.3478 | 130.0775 | 84.95964 | 77.03252 | 73.355034 |
| ENSMUSG Tcap      | 3.900462 | 27.51035 | 4.708472 | 7.06659  | 6.291216 | 3.359457  |
| ENSMUSG Fgd2      | 5.685201 | 4.356443 | 6.017526 | 8.706312 | 6.612436 | 8.678847  |
| ENSMUSG Mtch1     | 110.65   | 101.4524 | 112.2237 | 96.34294 | 98.12538 | 99.853747 |
| ENSMUSG Pi16      | 4.29626  | 4.816677 | 3.421008 | 5.964348 | 5.939169 | 6.098249  |
| ENSMUSG Hs3st5    | 0        | 0.01504  | 0        | 0.016961 | 0        | 0         |
| ENSMUSG Apoc4     | 0        | 0        | 0        | 0        | 0        | 0         |
| ENSMUSG Pim1      | 12.67794 | 10.17136 | 21.02729 | 27.97423 | 23.41042 | 23.003731 |
| ENSMUSG Cmtr1     | 11.95103 | 11.78456 | 13.49606 | 11.30369 | 10.58835 | 10.492456 |
| ENSMUSG 2510039O  | 24.9532  | 22.82619 | 26.17709 | 24.14626 | 26.61877 | 25.589514 |
| ENSMUSG Ccr8      | 0.573856 | 0.19988  | 0.213075 | 0.592543 | 0.937434 | 0.700221  |
| ENSMUSG Trem1     | 1.378747 | 1.520121 | 1.358214 | 0.363789 | 0.603261 | 0.220099  |
| ENSMUSG Slc26a9   | 8.026316 | 7.800584 | 9.005151 | 8.303309 | 6.612541 | 8.429795  |
| ENSMUSG Fam92b    | 1.447303 | 2.304694 | 1.463852 | 3.080687 | 3.581206 | 3.129459  |
| ENSMUSG Arf6      | 40.93895 | 39.06404 | 41.15081 | 41.82307 | 39.731   | 43.448696 |
| ENSMUSG Gabarapl2 | 46.48278 | 49.90446 | 48.78191 | 40.10992 | 38.3527  | 38.860004 |

|                   |          |          |          |          |          |           |
|-------------------|----------|----------|----------|----------|----------|-----------|
| ENSMUSG 1810024B  | 0.203032 | 0        | 0.094343 | 0.169068 | 0.203798 | 0         |
| ENSMUSG Nkrf      | 2.296653 | 1.661421 | 1.953932 | 1.795646 | 1.410704 | 1.787024  |
| ENSMUSG 1810030O  | 14.19829 | 14.82167 | 15.04918 | 14.38796 | 14.24887 | 13.198081 |
| ENSMUSG 2310057J1 | 0        | 0        | 0        | 0        | 0        | 0         |
| ENSMUSG lrf8      | 16.99921 | 15.06741 | 27.00834 | 25.16831 | 20.75732 | 25.269558 |
| ENSMUSG Polr2k    | 11.17802 | 14.12575 | 12.17033 | 15.40388 | 10.64682 | 10.185903 |
| Mus_musc Mus_musc | 0        | 0        | 0.270298 | 0        | 0        | 0.185074  |
| Mus_musc Mus_musc | 0.453907 | 0.139913 | 0        | 0        | 0        | 0         |
| Mus_musc Mus_musc | 0        | 0.178506 | 0        | 0.37085  | 0        | 0.136232  |
| ENSMUSG Folr1     | 0.300923 | 0.180992 | 0.23018  | 0.129062 | 0.344263 | 0.261214  |
| Mus_musc Mus_musc | 0        | 0        | 0.337872 | 0        | 0        | 0         |
| Mus_musc Mus_musc | 0        | 0.104607 | 0.263844 | 0.25778  | 0        | 0.493233  |
| ENSMUSG Clpb      | 7.535967 | 7.720889 | 6.822924 | 7.296135 | 6.477837 | 7.62933   |
| ENSMUSG Trim28    | 32.54148 | 30.14145 | 32.65564 | 28.31077 | 28.61542 | 29.79932  |
| ENSMUSG Ppip5k2   | 5.314885 | 5.438737 | 5.168083 | 5.497075 | 6.194106 | 5.415528  |
| ENSMUSG Rimklb    | 0.049004 | 0.040398 | 0.015767 | 0.026317 | 0.045557 | 0.023389  |
| ENSMUSG Nrm       | 6.320709 | 4.73299  | 7.043231 | 6.398602 | 6.185681 | 6.784363  |
| ENSMUSG Erc2      | 0.763134 | 0.873656 | 0.776798 | 0.411988 | 0.472182 | 0.362645  |
| ENSMUSG Eif4a1    | 130.072  | 119.0968 | 125.3491 | 141.137  | 140.3868 | 149.66542 |
| ENSMUSG Nat2      | 3.600613 | 3.522584 | 4.81698  | 3.667054 | 4.466033 | 3.792574  |
| ENSMUSG Camk2n2   | 0.433011 | 0.911512 | 0.795348 | 0.721001 | 0.880245 | 0.882411  |
| ENSMUSG Zc3h15    | 23.89852 | 24.11397 | 25.43926 | 27.78945 | 27.00702 | 26.112175 |
| ENSMUSG Adnp      | 17.09627 | 13.38786 | 17.34139 | 18.98324 | 10.21981 | 18.525182 |
| Mus_musc Mus_musc | 0.227312 | 0        | 0.175881 | 0.258045 | 0        | 0         |
| ENSMUSG Dbh       | 0        | 0        | 0        | 0.051687 | 0.03848  | 0.042674  |
| Mus_musc Mus_musc | 0.146192 | 0.359372 | 0.209442 | 0.074481 | 0.105075 | 0.131872  |
| ENSMUSG Dlg3      | 9.495271 | 9.443138 | 8.33597  | 10.61831 | 9.649011 | 10.750664 |
| ENSMUSG Gnb1l     | 1.302004 | 1.015694 | 0.96242  | 0.817374 | 0.597457 | 0.814269  |
| ENSMUSG Tnfrsf11b | 2.822273 | 2.257088 | 2.031011 | 3.131241 | 3.140247 | 3.049269  |
| Mus_musc Mus_musc | 0.569291 | 0.663415 | 0.705214 | 0.560006 | 0.291551 | 0.462245  |
| Mus_musc Mus_musc | 0        | 0        | 0        | 0        | 0        | 0         |
| Mus_musc Mus_musc | 0.1484   | 0.369867 | 0.376338 | 0.206142 | 0.190713 | 0.42207   |
| Mus_musc Mus_musc | 0        | 0        | 0        | 0        | 0        | 0.184186  |
| ENSMUSG Htr4      | 0.011548 | 0        | 0        | 0        | 0        | 0         |
| Mus_musc Mus_musc | 1.036566 | 1.056979 | 1.398403 | 1.473743 | 1.116794 | 1.351573  |
| Mus_musc Mus_musc | 0.531074 | 0.433833 | 0.453719 | 0.216686 | 0.43854  | 0.398511  |
| ENSMUSG Serpinb11 | 0        | 0        | 0        | 0.066467 | 0.042821 | 0         |
| Mus_musc Mus_musc | 16.31312 | 11.79226 | 15.98482 | 13.77844 | 14.52821 | 16.431221 |
| Mus_musc Mus_musc | 0        | 0        | 0.222085 | 0        | 0        | 0         |
| ENSMUSG Lsm2      | 10.16499 | 8.018368 | 8.472904 | 6.393539 | 10.39491 | 10.068903 |
| ENSMUSG Xirp2     | 0.057119 | 0.501715 | 0.057624 | 0.109997 | 0.06262  | 0.052304  |
| ENSMUSG Gm17078   | 0        | 0        | 0        | 0        | 0        | 0         |
| ENSMUSG Gm16430   | 0        | 0        | 0        | 0        | 0        | 0         |
| ENSMUSG Zcchc14   | 16.6855  | 18.36384 | 16.31282 | 12.71096 | 13.10668 | 12.415165 |
| ENSMUSG Nol4l     | 7.335289 | 6.388599 | 7.106977 | 5.400373 | 5.398285 | 5.397295  |
| ENSMUSG Cracr2a   | 5.702118 | 5.245092 | 5.188788 | 8.407677 | 7.584755 | 8.332795  |
| ENSMUSG Gm5108    | 0        | 0        | 0        | 0        | 0        | 0         |
| Mus_musc Mus_musc | 0.877353 | 0.969899 | 0.641205 | 0.497038 | 0.627914 | 0.134971  |
| Mus_musc Mus_musc | 0        | 0.271066 | 0.146697 | 0        | 0.13799  | 0.402629  |
| Mus_musc Mus_musc | 0.324302 | 0.432146 | 0.487714 | 0.431762 | 1.053162 | 0.453229  |
| Mus_musc Mus_musc | 0.637673 | 0.718938 | 0.981988 | 1.945662 | 2.512588 | 2.07094   |
| Mus_musc Mus_musc | 4.434549 | 5.010377 | 3.541767 | 4.095448 | 3.773366 | 6.193645  |
| Mus_musc Mus_musc | 0.137737 | 0.193849 | 0.078977 | 0.627128 | 0.413808 | 0.412394  |
| Mus_musc Mus_musc | 2.019443 | 2.09364  | 1.739405 | 1.633057 | 1.413899 | 1.250033  |
| Mus_musc Mus_musc | 0        | 0        | 0.138884 | 0.33571  | 0.063521 | 0         |
| ENSMUSG Lta4h     | 17.80383 | 17.13187 | 17.11789 | 20.38529 | 20.29933 | 23.733562 |
| ENSMUSG Ncapg     | 0.317454 | 0.235115 | 0.405293 | 1.528466 | 2.061549 | 2.61619   |
| ENSMUSG Lcorl     | 3.221375 | 3.590061 | 2.973747 | 3.63678  | 3.715433 | 3.889355  |
| ENSMUSG Slc39a13  | 13.29752 | 12.6434  | 15.8712  | 12.66246 | 12.8682  | 13.476257 |
| ENSMUSG Rapsn     | 0.945809 | 0.986891 | 0.958455 | 0.67956  | 0.848627 | 0.909947  |
| ENSMUSG Celf2     | 17.16334 | 18.95789 | 17.03691 | 17.29972 | 17.06025 | 17.377744 |
| ENSMUSG Mybpc3    | 0.188348 | 0.91329  | 0.141057 | 0.676648 | 0.415046 | 0.293158  |
| ENSMUSG Acp2      | 12.78197 | 10.75694 | 10.72486 | 13.62864 | 14.36513 | 15.201107 |
| ENSMUSG Psmc3     | 59.36653 | 60.65086 | 65.63948 | 57.96817 | 56.5178  | 62.44122  |

|                   |          |          |          |          |          |           |
|-------------------|----------|----------|----------|----------|----------|-----------|
| ENSMUSG Ddb2      | 4.493488 | 5.780545 | 4.884048 | 4.388706 | 3.415176 | 4.456335  |
| ENSMUSG Nr1h3     | 19.98018 | 23.26998 | 24.68021 | 17.76481 | 18.34317 | 17.860288 |
| ENSMUSG Gm26938   | 0.035836 | 0.018984 | 0.178214 | 0.03629  | 0.21639  | 0.304515  |
| ENSMUSG Gm10378   | 0        | 0        | 0        | 0        | 0        | 0         |
| ENSMUSG Gm3543    | 0        | 0        | 0        | 0        | 0        | 0         |
| ENSMUSG Nxph1     | 0.388528 | 0.559596 | 0.218215 | 0.428224 | 0.135957 | 0.330856  |
| ENSMUSG Olfr46    | 0        | 0        | 0        | 0        | 0        | 0         |
| ENSMUSG Vmn1r131  | 0        | 0        | 0        | 0        | 0        | 0         |
| ENSMUSG H2-M2     | 0.154254 | 0.299947 | 0.538201 | 16.91338 | 19.38764 | 19.185112 |
| ENSMUSG Gpn1      | 4.924466 | 4.55591  | 5.535282 | 4.674845 | 4.695245 | 4.219699  |
| ENSMUSG Zfp938    | 3.134712 | 2.795814 | 3.003619 | 3.271823 | 2.815387 | 2.345692  |
| ENSMUSG Stat4     | 1.838824 | 1.431552 | 2.887097 | 2.191075 | 1.94803  | 2.039174  |
| Mus_musc Mus_musc | 0.190173 | 0.699829 | 0.077586 | 0.15935  | 0.091136 | 0.157161  |
| Mus_musc Mus_musc | 0        | 0        | 0.052357 | 0        | 0        | 0         |
| Mus_musc Mus_musc | 0.501663 | 1.201904 | 0.608991 | 0.787182 | 1.061233 | 0.818107  |
| Mus_musc Mus_musc | 0        | 0        | 0.310043 | 0        | 0.254265 | 0         |
| Mus_musc Mus_musc | 0        | 0        | 0        | 0        | 0        | 0         |
| Mus_musc Mus_musc | 0.132491 | 0.105037 | 0.267033 | 0.250974 | 0.182733 | 0.094221  |
| ENSMUSG Gm6401    | 0        | 0        | 0        | 0        | 0        | 0         |
| Mus_musc Mus_musc | 0.466778 | 0.248497 | 0.105996 | 0.221284 | 0.368573 | 0.163961  |
| Mus_musc Mus_musc | 0        | 0.088207 | 0        | 0.713732 | 0        | 0.448298  |
| ENSMUSG 1700001J0 | 0        | 0        | 0        | 0        | 0        | 0         |
| ENSMUSG Gm11239   | 0        | 0        | 0        | 0        | 0        | 0         |
| Mus_musc Mus_musc | 0.540161 | 0.367358 | 0.442743 | 0.096634 | 0.401089 | 0.69606   |
| ENSMUSG Nanos2    | 0        | 0        | 0.024427 | 0        | 0        | 0         |
| ENSMUSG Vac14     | 9.936477 | 8.336149 | 9.868375 | 9.899281 | 11.54098 | 11.847337 |
| ENSMUSG Tlr11     | 0.931603 | 0.841366 | 1.218845 | 1.445703 | 0.984629 | 1.10025   |
| ENSMUSG Cpsf3     | 14.82549 | 15.62124 | 14.47341 | 15.48297 | 13.64873 | 15.996171 |
| ENSMUSG Eapp      | 9.625122 | 10.70198 | 10.59859 | 8.051295 | 8.46505  | 7.117932  |
| ENSMUSG Cops3     | 22.72107 | 24.07056 | 22.58334 | 22.14766 | 21.49568 | 22.796577 |
| ENSMUSG Calm3     | 114.2531 | 122.3073 | 121.2667 | 113.1576 | 126.7531 | 121.31359 |
| ENSMUSG Gm3409    | 0        | 0        | 0        | 0        | 0        | 0         |
| ENSMUSG Gm20852   | 0        | 0        | 0        | 0        | 0        | 0         |
| ENSMUSG Vmn1r103  | 0        | 0        | 0        | 0        | 0        | 0         |
| ENSMUSG Flii      | 48.03834 | 44.55071 | 45.68172 | 38.52034 | 38.86782 | 40.983303 |
| ENSMUSG Top3a     | 3.994167 | 2.846547 | 3.57754  | 3.526846 | 3.068973 | 3.072303  |
| ENSMUSG Rit2      | 0        | 0.016369 | 0        | 0        | 0        | 0         |
| ENSMUSG Lypd3     | 0        | 0.026763 | 0        | 0        | 0.043928 | 0         |
| Mus_musc Mus_musc | 0        | 0        | 0        | 0        | 0        | 0.184186  |
| ENSMUSG Gm49359   | 3.895616 | 4.135327 | 2.86483  | 3.883661 | 4.126137 | 3.867857  |
| ENSMUSG Zbtb42    | 10.02988 | 10.79833 | 10.28729 | 9.394626 | 10.22274 | 10.779943 |
| ENSMUSG Slc25a43  | 1.567211 | 1.651568 | 1.211444 | 1.30379  | 1.432288 | 2.848504  |
| Mus_musc Mus_musc | 0        | 0        | 0        | 0        | 0        | 0.243093  |
| ENSMUSG Prune1    | 7.99942  | 6.963082 | 7.838503 | 7.055413 | 7.41671  | 7.915844  |
| ENSMUSG Cers2     | 103.5973 | 103.0872 | 103.0425 | 87.57918 | 84.66826 | 90.398164 |
| ENSMUSG Rps12-ps3 | 371.5042 | 334.8852 | 377.589  | 394.519  | 394.0832 | 419.9874  |
| ENSMUSG Hist1h3h  | 0.137249 | 0.158402 | 0.092072 | 0.093782 | 0.585514 | 0.033611  |
| ENSMUSG Gm14124   | 0.027413 | 0.028837 | 0        | 0.01724  | 0        | 0         |
| ENSMUSG Gm14139   | 0.085855 | 0        | 0        | 0        | 0.030251 | 0.031977  |
| ENSMUSG Gm14151   | 0        | 0        | 0        | 0        | 0        | 0         |
| ENSMUSG Tcl1b4    | 0        | 0        | 0        | 0        | 0        | 0         |
| ENSMUSG Gm14147   | 0        | 0        | 0        | 0        | 0        | 0         |
| ENSMUSG Samd1     | 11.79447 | 11.45586 | 11.03877 | 8.389061 | 10.47242 | 11.128628 |
| ENSMUSG 4930404H  | 0        | 0        | 0        | 0        | 0        | 0         |
| ENSMUSG Pcnx3     | 12.77198 | 11.60331 | 12.92286 | 12.12412 | 11.68349 | 12.377193 |
| ENSMUSG Tmem158   | 0.82747  | 0.891244 | 0.582988 | 1.231632 | 1.090929 | 1.008829  |
| ENSMUSG Tmco5b    | 0        | 0        | 0        | 0        | 0        | 0         |
| ENSMUSG 6-Sep     | 4.646112 | 3.818886 | 4.448201 | 5.908549 | 5.138863 | 5.843395  |
| ENSMUSG Olfr180   | 0        | 0        | 0        | 0        | 0        | 0         |
| ENSMUSG Gm8356    | 0        | 0        | 0        | 0        | 0        | 0         |
| ENSMUSG Tex9      | 0.818457 | 0.931284 | 0.932312 | 1.502569 | 1.084474 | 1.726036  |
| ENSMUSG Gm20721   | 0.056735 | 0.048136 | 0.04232  | 0.063709 | 0.02744  | 0.067847  |
| ENSMUSG Ctnnbp2   | 1.995062 | 1.892918 | 1.824393 | 1.343972 | 1.459741 | 1.299944  |
| ENSMUSG Zfp236    | 9.377591 | 10.65407 | 7.878356 | 8.627968 | 9.774565 | 8.932429  |

|                    |          |          |          |          |          |           |
|--------------------|----------|----------|----------|----------|----------|-----------|
| ENSMUSG A930033H   | 0.305511 | 0.387151 | 0.382368 | 0.098584 | 0.389796 | 0.179968  |
| ENSMUSG Snx21      | 13.02863 | 14.08902 | 13.79262 | 9.591061 | 9.957354 | 10.106849 |
| Mus_musc Mus_musc  | 0        | 0        | 0        | 0.174016 | 0        | 0         |
| Mus_musc Mus_musc  | 0        | 0        | 0.168936 | 0        | 0        | 0         |
| Mus_musc Mus_musc  | 1.452944 | 1.483149 | 1.211429 | 0.772597 | 1.222365 | 1.041299  |
| Mus_musc Mus_musc  | 0.338966 | 0.505939 | 0.312369 | 0.081528 | 0.46557  | 0.473997  |
| ENSMUSG Lrch4      | 5.744548 | 3.001366 | 12.33423 | 5.362622 | 7.786294 | 7.471501  |
| ENSMUSG Gm21320    | 0        | 0        | 0        | 0        | 0        | 0         |
| Mus_musc Mus_musc  | 0.461075 | 0.320647 | 0.272781 | 0.201533 | 0        | 0.350733  |
| ENSMUSG Olfr892-ps | 0        | 0        | 0        | 0        | 0        | 0         |
| ENSMUSG Cmtm1      | 0        | 0        | 0        | 0.090963 | 0        | 0         |
| Mus_musc Mus_musc  | 0.074349 | 0.223197 | 0.193716 | 0        | 0        | 0         |
| Mus_musc Mus_musc  | 0.902213 | 0.902537 | 0.508409 | 0.13214  | 0.079417 | 0.202858  |
| Mus_musc Mus_musc  | 0.284798 | 0.358019 | 0        | 0        | 0.094792 | 0         |
| Mus_musc Mus_musc  | 0.532172 | 0.832248 | 0.844331 | 1.487964 | 0.407012 | 1.27672   |
| ENSMUSG Hspa1a     | 12.84126 | 55.73718 | 63.24224 | 7.99168  | 13.94237 | 47.091724 |
| ENSMUSG Tmem207    | 0        | 0        | 0        | 0        | 0        | 0         |
| ENSMUSG Gm9048     | 0.754185 | 0.435703 | 0.439882 | 0.271354 | 0.416143 | 0.272055  |
| ENSMUSG Nup155     | 3.530389 | 3.775474 | 3.620335 | 3.409145 | 3.65859  | 3.661719  |
| ENSMUSG Nipbl      | 17.70325 | 17.34028 | 14.75592 | 15.40132 | 16.16692 | 15.029493 |
| ENSMUSG Osmr       | 14.64153 | 13.8102  | 13.67199 | 10.92095 | 10.71115 | 10.678299 |
| ENSMUSG Gdnf       | 3.425458 | 2.040377 | 2.922081 | 1.305832 | 1.304814 | 1.61356   |
| ENSMUSG C9         | 0        | 0        | 0        | 0        | 0        | 0         |
| ENSMUSG Fyb        | 6.37437  | 5.43069  | 11.59168 | 10.75596 | 9.386229 | 9.510635  |
| Mus_musc Mus_musc  | 0        | 0        | 0.168936 | 0        | 0        | 0         |
| ENSMUSG Cdon       | 3.03422  | 3.527943 | 2.071108 | 2.432438 | 2.158528 | 2.714908  |
| ENSMUSG Phf20      | 10.52058 | 10.62865 | 10.42338 | 9.890531 | 10.2947  | 10.445113 |
| ENSMUSG Ano2       | 0        | 0        | 0        | 0.01221  | 0.033912 | 0.092586  |
| ENSMUSG AW551984   | 0.154025 | 0.296613 | 0.023571 | 0.164977 | 0.111689 | 0.117599  |
| Mus_musc Mus_musc  | 0.201194 | 0        | 0.09742  | 0.116011 | 0        | 0         |
| Mus_musc Mus_musc  | 0.387601 | 0.258908 | 0.202626 | 0.027696 | 0.297491 | 0.254827  |
| Mus_musc Mus_musc  | 0.242778 | 0        | 0        | 0        | 0        | 0         |
| ENSMUSG Ccdc157    | 9.817756 | 10.07683 | 8.941086 | 7.930816 | 7.55779  | 7.268868  |
| ENSMUSG Olfr1184   | 0        | 0        | 0        | 0        | 0        | 0         |
| Mus_musc Mus_musc  | 0.331704 | 0.701268 | 0.236364 | 0.929249 | 0.585425 | 0.74456   |
| ENSMUSG Foxi2      | 0        | 0        | 0        | 0        | 0        | 0         |
| Mus_musc Mus_musc  | 1.482846 | 1.4315   | 1.155296 | 1.193315 | 0.701969 | 0.482112  |
| Mus_musc Mus_musc  | 0.122866 | 0.159826 | 0.150341 | 0.210277 | 0.104883 | 0.289109  |
| ENSMUSG Rnf8       | 4.05595  | 4.847661 | 4.230645 | 3.5046   | 4.004782 | 4.797224  |
| ENSMUSG SrpX       | 3.209315 | 2.270948 | 3.252856 | 3.04996  | 3.098806 | 3.107175  |
| ENSMUSG Lurap1     | 2.618307 | 2.960383 | 2.214617 | 2.740978 | 2.516683 | 2.739399  |
| ENSMUSG Atp2a3     | 116.8909 | 103.908  | 93.68717 | 71.28462 | 76.31006 | 76.210347 |
| ENSMUSG P2rx1      | 1.077248 | 0.718786 | 1.082523 | 3.14764  | 2.602654 | 3.244669  |
| ENSMUSG Camkk1     | 5.397254 | 4.746091 | 5.611774 | 4.025496 | 4.612048 | 4.708476  |
| ENSMUSG Ncbp3      | 2.998312 | 3.490974 | 3.224077 | 3.00438  | 3.025007 | 3.098965  |
| ENSMUSG Llgl2      | 20.60654 | 18.8365  | 20.54995 | 17.80245 | 17.09051 | 18.864067 |
| ENSMUSG Tsen54     | 6.133188 | 6.93316  | 6.856508 | 6.406318 | 5.795137 | 6.901311  |
| ENSMUSG Srp68      | 29.47244 | 29.18421 | 27.95751 | 27.34891 | 29.18404 | 28.553508 |
| ENSMUSG Oxld1      | 3.926679 | 3.229015 | 3.948063 | 5.232995 | 4.621643 | 4.42359   |
| ENSMUSG Ifitm1     | 31.04023 | 39.93145 | 34.02276 | 51.19782 | 49.76799 | 42.495175 |
| ENSMUSG Ifitm3     | 283.315  | 263.3949 | 517.5791 | 263.5197 | 196.4451 | 216.62911 |
| ENSMUSG Sigirr     | 16.37191 | 16.6204  | 19.73325 | 14.94464 | 13.40805 | 11.951814 |
| ENSMUSG Ptdss2     | 5.654364 | 5.156681 | 5.628734 | 5.868832 | 5.98309  | 6.392065  |
| ENSMUSG Drd4       | 0.019011 | 0        | 0        | 0.050172 | 0        | 0.029612  |
| ENSMUSG Cdhr5      | 0.049441 | 0.189305 | 0.022493 | 0.217175 | 0        | 0.039038  |
| ENSMUSG Irf7       | 11.86439 | 7.37012  | 24.93088 | 9.673396 | 8.838101 | 9.041267  |
| ENSMUSG Hras       | 25.23063 | 22.47048 | 27.67918 | 19.94295 | 18.55309 | 21.491651 |
| Mus_musc Mus_musc  | 0        | 0.117694 | 0.175101 | 0.330088 | 0.24349  | 0         |
| Mus_musc Mus_musc  | 0        | 0        | 0        | 0.26037  | 0        | 0         |
| Mus_musc Mus_musc  | 0.074759 | 0.295073 | 0.103513 | 0        | 0        | 0         |
| Mus_musc Mus_musc  | 0.196426 | 0.171876 | 0        | 0        | 0        | 0.079759  |
| Mus_musc Mus_musc  | 0        | 0        | 0        | 0        | 0        | 0         |
| ENSMUSG Rusc2      | 31.9342  | 31.83486 | 31.12371 | 17.64131 | 18.11361 | 16.676985 |
| ENSMUSG Gm20773    | 0        | 0        | 0        | 0        | 0        | 0         |

|                   |          |          |          |          |          |           |
|-------------------|----------|----------|----------|----------|----------|-----------|
| ENSMUSG Olfr968   | 0        | 0        | 0        | 0        | 0        | 0         |
| ENSMUSG Vmn1r88   | 0        | 0        | 0        | 0        | 0        | 0         |
| ENSMUSG Gm10324   | 0        | 0        | 0        | 0        | 0        | 0         |
| ENSMUSG Apex1     | 3.757817 | 5.473649 | 4.474322 | 5.584745 | 4.507412 | 6.115585  |
| ENSMUSG Odf3l2    | 0        | 0        | 0        | 0        | 0        | 0         |
| ENSMUSG Tmem59l   | 2.510995 | 1.906356 | 1.757571 | 2.252756 | 1.376089 | 1.732537  |
| ENSMUSG Ints6l    | 7.587971 | 9.613036 | 9.236559 | 9.898008 | 7.875091 | 8.625422  |
| ENSMUSG Cth       | 3.461022 | 3.653006 | 3.197082 | 3.651319 | 3.121876 | 3.72518   |
| ENSMUSG Tacr3     | 0        | 0        | 0        | 0        | 0        | 0         |
| ENSMUSG Wls       | 55.10197 | 55.93484 | 52.41912 | 46.06069 | 45.89908 | 45.939721 |
| ENSMUSG Rpe65     | 0        | 0        | 0        | 0.014104 | 0        | 0         |
| ENSMUSG Depdc1a   | 0.067902 | 0.071095 | 0.097966 | 0.246492 | 0.810328 | 0.62361   |
| ENSMUSG Lrrc7     | 0        | 0        | 0        | 0        | 0        | 0         |
| ENSMUSG Gm49391   | 0.488286 | 0.433491 | 1.008672 | 0.362028 | 0.323746 | 0.331827  |
| ENSMUSG E130309Dl | 10.67802 | 11.01875 | 11.081   | 9.499485 | 9.516236 | 10.591793 |
| ENSMUSG Lyplal1   | 2.094322 | 2.062786 | 1.578879 | 1.874147 | 2.711712 | 2.286279  |
| Mus_musc Mus_musc | 0.562415 | 0.685445 | 0.546092 | 0.687456 | 1.064744 | 0.693862  |
| ENSMUSG B3galnt2  | 12.401   | 13.52863 | 13.50384 | 11.38935 | 10.75476 | 10.924614 |
| ENSMUSG Trem2     | 3.052227 | 3.333053 | 4.090483 | 42.58495 | 38.15467 | 49.487208 |
| ENSMUSG Sesn3     | 5.950253 | 7.249517 | 6.183035 | 8.203531 | 7.490343 | 8.389783  |
| ENSMUSG Olfr1355  | 0        | 0        | 0        | 0        | 0        | 0         |
| ENSMUSG Olfr298   | 0        | 0        | 0        | 0        | 0        | 0         |
| ENSMUSG Gm3115    | 0        | 0        | 0        | 0        | 0        | 0         |
| ENSMUSG Fxr2      | 27.61662 | 28.01785 | 29.77991 | 21.64363 | 24.02616 | 22.057693 |
| ENSMUSG Mpdu1     | 24.39807 | 22.33896 | 22.15769 | 29.16889 | 25.70432 | 25.917014 |
| ENSMUSG Gm10722   | 0        | 0        | 0        | 0        | 0        | 0         |
| ENSMUSG Naa35     | 8.626002 | 10.35822 | 9.857023 | 10.34655 | 9.623371 | 9.413864  |
| ENSMUSG Agtpbp1   | 5.932091 | 7.581792 | 6.456183 | 5.873065 | 6.793254 | 6.1039    |
| ENSMUSG Golm1     | 12.0757  | 15.60293 | 12.11401 | 18.79192 | 20.51789 | 21.57076  |
| ENSMUSG 2210016F1 | 10.29785 | 7.774385 | 7.24709  | 8.379136 | 10.1975  | 9.630478  |
| ENSMUSG Slc28a3   | 0.211911 | 0.241766 | 0.160039 | 0.219865 | 0.260969 | 0.192185  |
| ENSMUSG Gkap1     | 13.36277 | 12.60131 | 15.5145  | 8.905647 | 11.33145 | 10.033767 |
| ENSMUSG Olfr881   | 0        | 0        | 0        | 0        | 0        | 0         |
| ENSMUSG Dapk1     | 23.39738 | 27.45067 | 23.05632 | 29.90505 | 30.1078  | 32.37556  |
| ENSMUSG H2-Eb1    | 115.8532 | 116.5307 | 288.9691 | 381.0913 | 289.2892 | 350.88895 |
| ENSMUSG Yap1      | 37.69272 | 38.67677 | 34.94171 | 25.82711 | 25.44433 | 25.314789 |
| ENSMUSG Fank1     | 1.270713 | 2.130415 | 1.225799 | 2.540601 | 2.010203 | 2.323146  |
| ENSMUSG Socs3     | 17.57236 | 13.92934 | 16.29456 | 15.77158 | 12.42316 | 15.146364 |
| ENSMUSG Chmp3     | 50.19838 | 47.58717 | 49.98468 | 36.99892 | 39.60945 | 39.926726 |
| ENSMUSG Uchl5     | 7.318867 | 8.403401 | 8.115911 | 7.540758 | 10.11649 | 8.297818  |
| ENSMUSG Zfp989    | 0        | 0        | 0        | 0        | 0        | 0         |
| ENSMUSG Pik3cd    | 9.340265 | 7.00344  | 12.54816 | 14.39667 | 13.74559 | 14.079888 |
| ENSMUSG Gsap      | 19.80699 | 17.64516 | 18.58054 | 20.09696 | 18.93662 | 19.772542 |
| ENSMUSG Ddx43     | 0.17457  | 0.178291 | 0.319654 | 0.222823 | 0.134753 | 0.220239  |
| ENSMUSG Kctd1     | 3.392155 | 3.654965 | 2.258649 | 3.209559 | 4.499608 | 3.622492  |
| ENSMUSG Ska1      | 0.081828 | 0        | 0.136529 | 0.477473 | 0.390285 | 0.648845  |
| ENSMUSG Olfr666   | 0        | 0        | 0        | 0        | 0        | 0         |
| ENSMUSG Olfr1410  | 0        | 0        | 0        | 0        | 0        | 0         |
| ENSMUSG Trcg1     | 0.055484 | 0.012397 | 0.018764 | 0        | 0.008571 | 0.037915  |
| ENSMUSG Bcl2a1c   | 0.12366  | 0.076112 | 0        | 0        | 0        | 0         |
| ENSMUSG F2rl2     | 0.65052  | 0.451148 | 0.618352 | 0.658229 | 0.432183 | 0.513469  |
| ENSMUSG Lclat1    | 9.580438 | 9.075551 | 8.845476 | 10.85422 | 11.17152 | 11.395033 |
| ENSMUSG Adal      | 6.379399 | 7.377764 | 6.921735 | 5.576156 | 5.241674 | 6.141909  |
| ENSMUSG Prr23a2   | 0        | 0        | 0        | 0        | 0        | 0         |
| ENSMUSG S100z     | 0        | 0.751436 | 0.324747 | 0        | 0        | 0.614416  |
| ENSMUSG Lrp4      | 20.64472 | 20.06507 | 21.14444 | 13.25892 | 15.2585  | 14.429613 |
| ENSMUSG Map1a     | 1.267471 | 1.13157  | 1.141951 | 1.171935 | 1.4958   | 1.505011  |
| ENSMUSG Arfgap2   | 24.4064  | 25.04009 | 25.15599 | 22.80163 | 21.29753 | 20.480066 |
| ENSMUSG Phlda1    | 28.14095 | 26.94102 | 29.19631 | 19.15821 | 20.08375 | 26.788799 |
| ENSMUSG Cysltr2   | 1.02714  | 0.528835 | 0.871008 | 0.767435 | 0.838043 | 1.189994  |
| ENSMUSG Anapc7    | 9.548757 | 9.657662 | 10.29178 | 9.065023 | 9.561154 | 10.512338 |
| ENSMUSG Tomm6     | 23.88453 | 37.3096  | 31.89912 | 33.7495  | 35.71126 | 38.577082 |
| ENSMUSG Gm6408    | 0        | 0        | 0        | 0        | 0        | 0         |
| ENSMUSG Esp16     | 0        | 0        | 0        | 0        | 0        | 0         |

|                   |          |          |          |          |          |           |
|-------------------|----------|----------|----------|----------|----------|-----------|
| ENSMUSG Fam160b1  | 12.18278 | 11.36432 | 11.50157 | 10.21316 | 9.845518 | 10.47071  |
| ENSMUSG Gm10666   | 0        | 0        | 0        | 0        | 0        | 0         |
| ENSMUSG Rpl9-ps6  | 87.39257 | 124.6674 | 88.04661 | 93.19664 | 88.22955 | 102.03724 |
| ENSMUSG Vps29     | 20.36769 | 20.74409 | 21.27065 | 19.34249 | 20.62911 | 19.651175 |
| ENSMUSG Ephx3     | 0.750284 | 0.510273 | 0.878317 | 0.40799  | 0.579929 | 0.466031  |
| ENSMUSG Mcrs1     | 22.79714 | 20.35373 | 20.56531 | 18.98223 | 19.45774 | 18.288203 |
| ENSMUSG Wdhd1     | 0.89117  | 0.878204 | 0.920257 | 1.436291 | 1.563165 | 1.473218  |
| ENSMUSG Tob1      | 24.76846 | 24.25083 | 21.37065 | 15.9005  | 16.98101 | 18.787479 |
| ENSMUSG Pkd2l1    | 0.013475 | 0        | 0.034744 | 0        | 0        | 0         |
| ENSMUSG Kcnh3     | 0.392791 | 0.69193  | 0.513478 | 0.594205 | 0.612531 | 0.713637  |
| ENSMUSG Rab23     | 4.90423  | 5.139785 | 3.881799 | 3.863122 | 3.687519 | 3.735766  |
| ENSMUSG Hnrnpul2  | 47.61771 | 43.13137 | 44.45652 | 41.07794 | 42.12442 | 40.785156 |
| ENSMUSG Gng3      | 0.098803 | 0.093292 | 0        | 0.194364 | 0.054622 | 0.088146  |
| ENSMUSG 1810009A: | 14.1272  | 13.22575 | 14.35056 | 15.41006 | 13.68335 | 15.943706 |
| ENSMUSG Ints5     | 7.214639 | 7.064878 | 7.447657 | 7.125742 | 6.571626 | 7.815581  |
| ENSMUSG Plekhh2   | 43.43853 | 44.70355 | 43.163   | 46.04479 | 47.61251 | 50.516729 |
| ENSMUSG Ganab     | 44.18885 | 41.38496 | 45.83536 | 45.88471 | 47.0178  | 48.581028 |
| ENSMUSG Bscl2     | 26.61226 | 22.21569 | 22.94433 | 31.24616 | 28.67038 | 31.838177 |
| ENSMUSG Cfc1      | 0        | 0        | 0        | 0        | 0        | 0         |
| ENSMUSG Imp4      | 7.718893 | 7.657801 | 7.772435 | 5.905029 | 5.957727 | 7.692014  |
| ENSMUSG Uqcc3     | 18.30755 | 18.08677 | 21.5144  | 20.22751 | 15.59388 | 17.832739 |
| ENSMUSG Dhx16     | 17.70931 | 15.21078 | 18.33257 | 14.57363 | 16.20074 | 16.54472  |
| ENSMUSG Gtf2i     | 50.38487 | 50.3723  | 48.92608 | 44.14052 | 43.35711 | 43.930551 |
| ENSMUSG Rhbdd3    | 2.65679  | 2.559659 | 3.25001  | 3.461074 | 2.766221 | 3.147515  |
| ENSMUSG Rnf43     | 4.248284 | 4.410185 | 3.647333 | 3.652861 | 3.222127 | 3.549481  |
| ENSMUSG Faah      | 8.015076 | 7.064316 | 6.750862 | 7.469761 | 6.560647 | 6.859193  |
| ENSMUSG Zbed5     | 3.256898 | 3.810228 | 4.021284 | 4.252747 | 2.316349 | 1.553757  |
| ENSMUSG Lmbrd1    | 23.57917 | 23.12961 | 22.07723 | 18.66767 | 19.70035 | 18.800846 |
| ENSMUSG Pramel4   | 0        | 0        | 0        | 0        | 0        | 0         |
| ENSMUSG Pramef20  | 0        | 0        | 0        | 0        | 0        | 0         |
| ENSMUSG Gm13102   | 0        | 0        | 0        | 0        | 0        | 0         |
| ENSMUSG 4931408C: | 0        | 0        | 0        | 0        | 0.035626 | 0         |
| ENSMUSG Arfip1    | 26.45521 | 26.83748 | 24.2266  | 25.98207 | 23.85235 | 25.7709   |
| ENSMUSG Zfp971    | 5.091099 | 6.064224 | 4.39563  | 6.475368 | 6.056633 | 6.66609   |
| ENSMUSG Ctu2      | 3.820187 | 3.20089  | 4.602004 | 3.379477 | 3.050821 | 3.597664  |
| ENSMUSG B2m       | 1074.136 | 965.5422 | 2288.593 | 1961.243 | 1470.321 | 1593.1563 |
| ENSMUSG Gstp1     | 114.1522 | 116.127  | 112.6961 | 93.51573 | 82.00507 | 92.970291 |
| ENSMUSG Abcf3     | 15.80641 | 15.64029 | 14.91497 | 14.16293 | 13.91939 | 14.031454 |
| ENSMUSG Eif2b5    | 19.90818 | 17.19261 | 18.12495 | 15.47581 | 16.00266 | 17.200854 |
| ENSMUSG Dvl3      | 10.63163 | 14.47527 | 12.49884 | 10.79519 | 11.42825 | 14.097076 |
| ENSMUSG Asphd1    | 0        | 0.045009 | 0.036346 | 0        | 0.026185 | 0.076716  |
| ENSMUSG Gm10260   | 256.8253 | 253.1166 | 275.8111 | 317.4712 | 287.0747 | 349.81812 |
| ENSMUSG Tuft1     | 9.66801  | 9.867032 | 11.31782 | 8.142038 | 7.74857  | 9.271986  |
| ENSMUSG Zfp646    | 12.7812  | 13.92506 | 12.22639 | 12.11657 | 11.54786 | 13.609668 |
| ENSMUSG Olfr1361  | 0        | 0        | 0        | 0        | 0        | 0         |
| ENSMUSG Trex1     | 4.309719 | 4.150314 | 9.209766 | 5.779856 | 5.758037 | 6.465589  |
| ENSMUSG Tom1      | 8.566494 | 9.284123 | 9.941787 | 9.858234 | 7.246332 | 9.376681  |
| ENSMUSG Lhfpl4    | 0.491521 | 0.40612  | 0.244934 | 0.518834 | 0.704299 | 0.644518  |
| ENSMUSG D930007J: | 0        | 0        | 0        | 0        | 0        | 0         |
| ENSMUSG 9430007A: | 0        | 0        | 0        | 0        | 0        | 0         |
| ENSMUSG Pramef12  | 0.091723 | 0.016435 | 0.114959 | 0.073922 | 0.043258 | 0.106024  |
| ENSMUSG Pcdha11   | 0.048844 | 0.259051 | 0.041032 | 0.042524 | 0.050945 | 0.061671  |
| ENSMUSG G6pc3     | 12.79935 | 11.20343 | 10.43092 | 10.9332  | 11.80547 | 11.178511 |
| ENSMUSG Gna15     | 2.894506 | 3.143953 | 3.15524  | 6.455982 | 6.459394 | 7.144305  |
| ENSMUSG Ccdc122   | 0.785558 | 0.637501 | 0.381751 | 0.689353 | 0.821512 | 1.079279  |
| ENSMUSG Cpne7     | 0.119402 | 0.125621 | 0.67706  | 0.54712  | 0.312581 | 0.525405  |
| ENSMUSG Unc13a    | 0.564556 | 0.653332 | 0.820645 | 0.676045 | 0.685535 | 0.677916  |
| ENSMUSG Lce3d     | 0        | 0        | 0        | 0        | 0        | 0         |
| ENSMUSG Crybb1    | 0        | 0        | 0.042521 | 0.155865 | 0.102236 | 0.243493  |
| ENSMUSG Tpst2     | 52.08123 | 50.15945 | 59.50512 | 40.83109 | 40.6128  | 37.378701 |
| ENSMUSG Tfip11    | 14.99504 | 14.59758 | 13.49401 | 11.74803 | 13.73686 | 13.197711 |
| ENSMUSG Srrd      | 3.269634 | 2.898425 | 3.123089 | 2.833356 | 3.331098 | 4.179564  |
| ENSMUSG Asphd2    | 0.042128 | 0        | 0.029838 | 0.032035 | 0.096414 | 0.020633  |
| ENSMUSG Ccdc106   | 0.098374 | 0.337784 | 0.176001 | 0.646686 | 0.271862 | 0.564474  |

|                   |          |          |          |          |          |           |
|-------------------|----------|----------|----------|----------|----------|-----------|
| ENSMUSG Ifi35     | 29.10505 | 26.33405 | 44.23248 | 26.06041 | 24.33376 | 25.751154 |
| ENSMUSG Rims4     | 0.011368 | 0.034426 | 0.010214 | 0        | 0.050266 | 0.008395  |
| ENSMUSG Spcs2     | 39.39059 | 39.23138 | 45.12806 | 56.64413 | 57.24294 | 53.735859 |
| ENSMUSG Hoxc4     | 0.23933  | 0.113131 | 0.123699 | 0.208679 | 0.187856 | 0.14563   |
| ENSMUSG A630010A  | 0        | 0        | 0        | 0        | 0        | 0         |
| ENSMUSG Elp1      | 4.925951 | 3.824941 | 3.346334 | 4.279945 | 4.060937 | 3.639183  |
| ENSMUSG Nol6      | 7.475139 | 6.456814 | 7.27061  | 7.407794 | 6.886365 | 7.541664  |
| ENSMUSG Ubap2     | 14.6421  | 14.43789 | 14.40611 | 12.79805 | 13.41396 | 14.650804 |
| ENSMUSG Aqp3      | 0.260474 | 0.813337 | 0.408893 | 1.866804 | 1.807901 | 1.400129  |
| ENSMUSG Epb41l4b  | 26.48691 | 28.49421 | 23.13948 | 14.84673 | 16.42916 | 14.347796 |
| ENSMUSG Ubap1     | 13.51591 | 13.99187 | 14.35395 | 14.30648 | 12.39325 | 14.16831  |
| ENSMUSG Dcaf12    | 21.38969 | 20.33235 | 20.69522 | 18.78596 | 18.37298 | 18.890221 |
| ENSMUSG Fam219a   | 16.23551 | 14.42279 | 16.54879 | 9.986525 | 10.50624 | 10.314501 |
| ENSMUSG Kif24     | 0.667361 | 0.418453 | 0.527423 | 0.789062 | 0.697335 | 1.080925  |
| Mus_musc Mus_musc | 0        | 0        | 0        | 0.190034 | 0        | 0         |
| ENSMUSG Gm13030   | 0        | 0        | 0        | 0        | 0        | 0         |
| ENSMUSG Emc1      | 6.606177 | 6.42252  | 7.048017 | 6.431006 | 6.066992 | 7.098314  |
| Mus_musc Mus_musc | 0.188031 | 0        | 0        | 0        | 0        | 0         |
| Mus_musc Mus_musc | 0        | 0.138601 | 0        | 0.35035  | 0.521521 | 0         |
| ENSMUSG Gm13088   | 0        | 0        | 0        | 0        | 0        | 0         |
| ENSMUSG Pramef6   | 0        | 0        | 0        | 0        | 0        | 0         |
| Mus_musc Mus_musc | 0.193396 | 0        | 0        | 0.340833 | 0.309733 | 0.09853   |
| Mus_musc Mus_musc | 0.386423 | 0        | 0        | 0.199903 | 0        | 0.22833   |
| ENSMUSG Impdh1    | 70.64778 | 72.1496  | 83.86233 | 42.78577 | 43.77827 | 43.888062 |
| ENSMUSG Ivns1abp  | 73.00823 | 60.23213 | 53.58569 | 50.23966 | 49.0962  | 50.259721 |
| ENSMUSG Olfr620   | 0        | 0        | 0        | 0        | 0        | 0         |
| ENSMUSG Gm49355   | 0.120912 | 0.27739  | 0.12505  | 0.08567  | 0.164256 | 0.167047  |
| ENSMUSG Lama1     | 0.010659 | 0.033693 | 0.025608 | 0.037339 | 0.069966 | 0.062124  |
| ENSMUSG Lsm11     | 1.860034 | 1.584031 | 1.472386 | 1.322393 | 1.529124 | 1.538368  |
| ENSMUSG Tmem147   | 29.36102 | 25.4226  | 26.26676 | 29.15744 | 26.90577 | 29.360709 |
| ENSMUSG Zbtb32    | 3.007902 | 2.57762  | 2.63887  | 3.998449 | 3.214621 | 3.934672  |
| ENSMUSG Etv2      | 0        | 0        | 0        | 0        | 0        | 0         |
| ENSMUSG Upk1a     | 3.253235 | 2.22277  | 2.374057 | 0.429101 | 0.21599  | 0.590277  |
| ENSMUSG Nipsnap3t | 13.64915 | 12.44281 | 13.26476 | 15.6258  | 15.33933 | 15.316891 |
| ENSMUSG Gm15517   | 0        | 0        | 0        | 0        | 0        | 0         |
| ENSMUSG Tmem170l  | 6.214188 | 7.250884 | 7.122075 | 6.604401 | 6.214441 | 6.734437  |
| ENSMUSG Dyrk3     | 1.223363 | 1.243545 | 0.842502 | 1.287247 | 1.784818 | 1.99735   |
| ENSMUSG Olfr178   | 0        | 0        | 0.022252 | 0        | 0        | 0         |
| Mus_musc Mus_musc | 0        | 0        | 0.218803 | 0        | 0.118089 | 0         |
| ENSMUSG Slc6a11   | 0        | 0        | 0        | 0        | 0        | 0         |
| ENSMUSG Anp32a    | 87.47913 | 98.03153 | 96.04089 | 76.32673 | 70.30015 | 67.745349 |
| ENSMUSG Gm1110    | 0        | 0        | 0        | 0        | 0        | 0         |
| ENSMUSG Plin3     | 17.43713 | 16.72736 | 15.01395 | 17.69415 | 18.73823 | 18.916357 |
| ENSMUSG Cuta      | 33.41845 | 31.79743 | 34.18414 | 35.83656 | 35.11734 | 33.551361 |
| ENSMUSG Calml4    | 6.888775 | 7.458977 | 6.368481 | 6.397189 | 4.943197 | 4.625965  |
| ENSMUSG Rpl39     | 74.32221 | 75.26326 | 84.68942 | 98.82239 | 85.61412 | 93.100189 |
| ENSMUSG Itga11    | 0.24676  | 0.324674 | 0.20732  | 0.195764 | 0.087617 | 0.270664  |
| ENSMUSG Bnip1     | 6.082466 | 5.511133 | 6.854739 | 7.4689   | 8.454424 | 7.283942  |
| ENSMUSG Lnx2      | 11.01587 | 12.33396 | 9.842486 | 8.132497 | 9.107428 | 8.366105  |
| ENSMUSG Pik3cg    | 2.996681 | 3.128595 | 3.749657 | 7.28102  | 7.390179 | 7.931401  |
| ENSMUSG Olfm5     | 0        | 0        | 0        | 0        | 0        | 0         |
| ENSMUSG Krtap21-1 | 0        | 0        | 0        | 0        | 0        | 0         |
| ENSMUSG Gmpr      | 8.689275 | 8.138593 | 7.476869 | 5.483712 | 5.576193 | 6.464121  |
| ENSMUSG Fkbp5     | 23.52304 | 17.5853  | 25.73285 | 8.116717 | 11.39718 | 9.546648  |
| ENSMUSG Armc12    | 0        | 0        | 0        | 0        | 0        | 0         |
| ENSMUSG Clpsl2    | 0        | 0        | 0        | 0        | 0        | 0         |
| ENSMUSG Clps      | 0        | 0        | 0        | 0        | 0        | 0         |
| ENSMUSG Pdzph1    | 0        | 0        | 0        | 0        | 0        | 0         |
| ENSMUSG Nudt12    | 2.432586 | 2.772285 | 2.126165 | 1.938096 | 2.346182 | 1.914705  |
| Mus_musc Mus_musc | 0        | 0.207916 | 0        | 0.112268 | 0        | 0         |
| Mus_musc Mus_musc | 4.77116  | 10.82933 | 10.28241 | 12.73444 | 9.542922 | 4.874622  |
| Mus_musc Mus_musc | 0        | 0        | 0        | 0        | 0        | 0.368372  |
| Mus_musc Mus_musc | 0.61379  | 0.678447 | 0.592075 | 0.745895 | 0.617068 | 0.464985  |
| Mus_musc Mus_musc | 0.121471 | 0.100341 | 0        | 0        | 0.186692 | 0         |

|                   |          |          |          |          |          |           |
|-------------------|----------|----------|----------|----------|----------|-----------|
| ENSMUSG Coro2b    | 22.37423 | 19.69096 | 22.30258 | 13.99931 | 15.45258 | 14.161634 |
| ENSMUSG Pi4ka     | 14.35966 | 14.61826 | 13.47164 | 16.2843  | 16.84168 | 17.51333  |
| ENSMUSG Khdc1c    | 0        | 0.096424 | 0.038544 | 0.070465 | 0.040697 | 0         |
| ENSMUSG Wdr83     | 13.32176 | 13.48279 | 13.40776 | 11.92002 | 10.87546 | 11.995492 |
| ENSMUSG Lrrc49    | 4.919329 | 4.031006 | 3.843819 | 3.865937 | 4.028386 | 3.803791  |
| ENSMUSG Atg16l2   | 3.610006 | 3.316884 | 4.909187 | 4.519087 | 5.065828 | 3.768713  |
| ENSMUSG Olfr913   | 0        | 0        | 0        | 0        | 0        | 0         |
| ENSMUSG Mtfmt     | 3.983053 | 3.382109 | 4.418841 | 3.865638 | 4.137403 | 3.907601  |
| ENSMUSG Skap2     | 20.62753 | 23.86368 | 22.44276 | 23.88623 | 23.59602 | 24.634489 |
| ENSMUSG Fam19a1   | 0.824175 | 0.60192  | 0.637644 | 0.219447 | 0.358265 | 0.208031  |
| ENSMUSG Supt20    | 16.23262 | 15.88678 | 15.86055 | 14.27316 | 15.20313 | 14.551752 |
| ENSMUSG Postn     | 97.1022  | 95.13019 | 129.8272 | 81.66864 | 89.02197 | 77.572898 |
| ENSMUSG Exosc8    | 8.049279 | 7.967774 | 10.07313 | 9.298934 | 7.95008  | 9.0933    |
| ENSMUSG Dsg3      | 0        | 0        | 0        | 0        | 0        | 0         |
| ENSMUSG Serhl     | 7.596253 | 8.17078  | 7.162053 | 7.675451 | 7.00841  | 7.282682  |
| ENSMUSG Tmod3     | 73.57607 | 72.50734 | 71.06868 | 54.68027 | 54.35456 | 53.083897 |
| ENSMUSG Anks1b    | 0.077398 | 0.078177 | 0.028569 | 0.051275 | 0.037023 | 0.041321  |
| ENSMUSG Anp32b    | 55.75462 | 58.81468 | 66.21984 | 60.79242 | 59.36133 | 57.970093 |
| ENSMUSG Fam180a   | 2.516062 | 2.946288 | 1.751004 | 1.517278 | 2.065996 | 1.937625  |
| Mus_musc Mus_musc | 0.188031 | 0        | 0        | 0        | 0        | 0         |
| Mus_musc Mus_musc | 0        | 0        | 0        | 0        | 0.102145 | 0.377053  |
| ENSMUSG Shmt2     | 10.86043 | 9.482408 | 11.09208 | 14.45135 | 14.96622 | 14.318896 |
| Mus_musc Mus_musc | 0        | 0.232676 | 0        | 0.250898 | 0.449191 | 0         |
| Mus_musc Mus_musc | 0.068398 | 0.067694 | 0        | 0.073495 | 0        | 0.175654  |
| Mus_musc Mus_musc | 0        | 0        | 0        | 0        | 0        | 0.184893  |
| ENSMUSG Psap      | 355.777  | 319.2581 | 393.405  | 1193.948 | 1281.627 | 1539.2023 |
| ENSMUSG Olfr283   | 0        | 0        | 0        | 0        | 0        | 0         |
| ENSMUSG Snx32     | 1.430439 | 1.412304 | 1.988532 | 1.196282 | 0.891489 | 1.485839  |
| Mus_musc Mus_musc | 0.194725 | 0        | 0.188831 | 0.094503 | 0.383962 | 0.114971  |
| Mus_musc Mus_musc | 0.239349 | 0.687647 | 0.218284 | 0        | 0        | 0.393899  |
| Mus_musc Mus_musc | 0.295899 | 0.40825  | 0.449911 | 0.139746 | 0.199861 | 0.2616    |
| Mus_musc Mus_musc | 0        | 0        | 0.174068 | 0.058358 | 0        | 0         |
| ENSMUSG Obox3     | 0        | 0        | 0        | 0        | 0        | 0         |
| ENSMUSG Irs3      | 0.961479 | 0.98581  | 0.773477 | 0.595914 | 0.374503 | 0.870891  |
| ENSMUSG Neurl3    | 9.155285 | 5.978492 | 12.42581 | 15.59342 | 12.64069 | 16.475764 |
| ENSMUSG Samd14    | 2.711608 | 2.805354 | 2.699491 | 2.756881 | 2.917642 | 3.035187  |
| ENSMUSG Rab2a     | 66.31131 | 66.93311 | 63.64865 | 50.07636 | 54.97236 | 51.560314 |
| ENSMUSG Actl7b    | 0.0098   | 0        | 0.149683 | 0        | 0        | 0         |
| ENSMUSG Lipo5     | 0        | 0        | 0        | 0        | 0        | 0         |
| ENSMUSG Pmpca     | 16.05965 | 17.0777  | 15.85634 | 16.14165 | 15.25421 | 15.650841 |
| ENSMUSG Olfr738   | 0        | 0        | 0        | 0        | 0        | 0         |
| ENSMUSG 1600014C; | 0        | 0        | 0        | 0        | 0        | 0         |
| ENSMUSG Gm21953   | 0.954762 | 0.741329 | 0.711517 | 0.508062 | 0.750893 | 0.351396  |
| Mus_musc Mus_musc | 0.21017  | 0.262012 | 0.268128 | 0.577691 | 0.315912 | 0.37159   |
| Mus_musc Mus_musc | 0        | 0        | 0        | 0.211846 | 0        | 0         |
| Mus_musc Mus_musc | 0        | 0.181722 | 0        | 0        | 0        | 0         |
| Mus_musc Mus_musc | 0.357632 | 0.263011 | 0.077363 | 0.270223 | 0.326824 | 0.39052   |
| Mus_musc Mus_musc | 0.707312 | 0.615694 | 0.587053 | 0.257834 | 0.530206 | 0.267684  |
| Mus_musc Mus_musc | 0        | 0.229571 | 0.07167  | 0.129068 | 0        | 0         |
| Mus_musc Mus_musc | 0        | 0        | 0        | 0.059868 | 0        | 0.347673  |
| Mus_musc Mus_musc | 1.485393 | 2.089254 | 1.706305 | 2.296002 | 2.4251   | 2.3969    |
| Mus_musc Mus_musc | 0.460898 | 0.225208 | 0.179762 | 0.519001 | 0.541077 | 0.526493  |
| Mus_musc Mus_musc | 0.412289 | 0.148242 | 0.20569  | 0.561504 | 0.247374 | 0.11925   |
| Mus_musc Mus_musc | 0        | 0        | 0        | 0        | 0.186692 | 0         |
| Mus_musc Mus_musc | 0        | 0        | 0        | 0.174016 | 0        | 0         |
| ENSMUSG Vmn1r8    | 0        | 0.038164 | 0        | 0        | 0        | 0         |
| ENSMUSG Olfr635   | 0        | 0        | 0        | 0        | 0        | 0         |
| ENSMUSG Ankrd37   | 4.497136 | 6.663581 | 5.279061 | 2.484363 | 3.467975 | 3.726052  |
| ENSMUSG Fgf4      | 0        | 0        | 0        | 0        | 0        | 0         |
| ENSMUSG Cdr2l     | 7.165522 | 8.463822 | 7.069507 | 6.464512 | 5.505005 | 6.55479   |
| ENSMUSG Stk19     | 7.983657 | 9.666194 | 12.25922 | 9.123531 | 9.977877 | 9.430423  |
| ENSMUSG Tmem123   | 81.82463 | 78.18651 | 73.32849 | 82.08387 | 90.74998 | 89.551918 |
| ENSMUSG Taok1     | 13.74298 | 14.48212 | 11.69613 | 11.2495  | 10.83997 | 10.154729 |
| ENSMUSG Gm10772   | 0        | 0        | 0        | 0        | 0        | 0         |



|                   |          |          |          |          |          |           |
|-------------------|----------|----------|----------|----------|----------|-----------|
| ENSMUSG Col6a5    | 0.322522 | 0.303519 | 0.254786 | 5.032597 | 8.067134 | 6.012018  |
| ENSMUSG Dnrtip1   | 10.943   | 11.28399 | 10.76655 | 10.19965 | 10.80821 | 10.563137 |
| ENSMUSG Nit1      | 12.39353 | 12.18006 | 12.4016  | 13.61894 | 13.43375 | 14.49928  |
| ENSMUSG Trim36    | 1.773571 | 1.302271 | 1.29069  | 1.041684 | 1.27582  | 1.442272  |
| ENSMUSG Zswim5    | 1.133545 | 1.463837 | 1.011892 | 0.806703 | 1.1706   | 1.127489  |
| ENSMUSG Olfr541   | 0        | 0        | 0        | 0        | 0        | 0         |
| ENSMUSG Lym2      | 19.30396 | 18.30307 | 17.34526 | 18.62834 | 16.11556 | 17.522053 |
| ENSMUSG Tg        | 0.305846 | 0.320483 | 0.320582 | 0.47564  | 0.313113 | 0.462157  |
| ENSMUSG 1810046K  | 0.256225 | 0        | 0.149197 | 0.099023 | 0.241085 | 0.250845  |
| ENSMUSG Gm17190   | 0        | 0        | 0        | 0.07194  | 0        | 0         |
| ENSMUSG Parp2     | 10.94065 | 10.89912 | 10.35387 | 9.769031 | 8.921672 | 9.339352  |
| ENSMUSG Fam122b   | 2.63613  | 2.633339 | 2.453845 | 3.989535 | 3.589121 | 3.366097  |
| ENSMUSG Ggcx      | 15.24458 | 13.34539 | 13.61042 | 15.19059 | 14.45045 | 16.094467 |
| ENSMUSG Hhipl2    | 0        | 0.072113 | 0.079952 | 0        | 0.161628 | 0.02947   |
| ENSMUSG Hs6st3    | 0.836564 | 1.055501 | 0.508589 | 0.813841 | 1.217654 | 0.953822  |
| ENSMUSG Brk1      | 76.61558 | 74.70943 | 76.76752 | 75.88097 | 77.11809 | 77.0028   |
| ENSMUSG Krtap29-1 | 0        | 0        | 0        | 0        | 0        | 0         |
| ENSMUSG Krtap9-5  | 0        | 0        | 0        | 0        | 0        | 0         |
| ENSMUSG Gm11565   | 0        | 0        | 0        | 0        | 0        | 0         |
| ENSMUSG 2300003K  | 0        | 0        | 0        | 0        | 0        | 0         |
| ENSMUSG Zfp991    | 2.308567 | 2.272557 | 1.412146 | 4.310178 | 4.001998 | 4.668514  |
| ENSMUSG Krtap17-1 | 8.920498 | 3.152133 | 3.370413 | 0.626778 | 0.516409 | 0.478255  |
| ENSMUSG Krtap16-1 | 0        | 0        | 0        | 0        | 0        | 0         |
| ENSMUSG Rex2      | 0        | 0        | 0        | 0        | 0        | 0.01276   |
| ENSMUSG Gm11564   | 0        | 0        | 0        | 0        | 0        | 0         |
| ENSMUSG Gm11554   | 0        | 0        | 0        | 0        | 0        | 0         |
| ENSMUSG Mbd5      | 4.998538 | 5.305214 | 4.799718 | 4.531321 | 4.628467 | 4.639771  |
| ENSMUSG Slitrk2   | 0        | 0.004926 | 0        | 0        | 0        | 0         |
| ENSMUSG Gm13289   | 0        | 0        | 0        | 0        | 0        | 0         |
| ENSMUSG Olfr611   | 0        | 0        | 0        | 0        | 0        | 0         |
| ENSMUSG Mrp123    | 26.11146 | 27.63552 | 30.71261 | 27.03069 | 26.21882 | 23.236933 |
| ENSMUSG Pced1a    | 4.143146 | 3.673608 | 4.452579 | 4.517426 | 4.974213 | 4.962075  |
| ENSMUSG Slc32a1   | 0.040336 | 0        | 0        | 0        | 0        | 0.019755  |
| ENSMUSG Skp2      | 1.178439 | 1.120278 | 1.395254 | 1.458649 | 1.67686  | 1.771776  |
| ENSMUSG Zdhhc25   | 0        | 0        | 0        | 0        | 0        | 0         |
| ENSMUSG E130116L1 | 0.155141 | 0        | 0        | 0        | 0.404232 | 0.39071   |
| ENSMUSG Gm3854    | 0.12391  | 0.131712 | 0.140074 | 0.044241 | 0.109547 | 0.093467  |
| ENSMUSG Gm5737    | 0        | 0.027538 | 0        | 0.091386 | 0        | 0.08717   |
| ENSMUSG Olfr410   | 0        | 0        | 0        | 0        | 0        | 0         |
| ENSMUSG Gm4565    | 0        | 0        | 0        | 0        | 0        | 0         |
| ENSMUSG Gm20814   | 0        | 0        | 0        | 0        | 0        | 0         |
| ENSMUSG Adat3     | 0.90401  | 0.357284 | 1.181616 | 0.252797 | 0.371814 | 0.311194  |
| ENSMUSG Gm19426   | 1.262867 | 0.544971 | 1.312783 | 1.01797  | 0.622308 | 0.897083  |
| ENSMUSG Rbm44     | 0        | 0        | 0        | 0.006597 | 0        | 0         |
| ENSMUSG Rab11b    | 29.8375  | 26.72559 | 28.20197 | 24.1995  | 23.52571 | 22.75007  |
| ENSMUSG Ccdc12    | 35.80544 | 37.16754 | 43.12468 | 36.69399 | 37.04385 | 39.872037 |
| ENSMUSG Cplx2     | 3.893436 | 3.349087 | 2.778054 | 2.581899 | 2.786482 | 2.489691  |
| ENSMUSG Xiap      | 36.4491  | 34.42233 | 30.84474 | 28.19894 | 26.1139  | 25.555894 |
| ENSMUSG Stag2     | 37.21313 | 36.63783 | 29.84509 | 27.92489 | 27.83034 | 26.567561 |
| ENSMUSG Nop16     | 6.863649 | 5.906313 | 7.758156 | 7.686708 | 7.579424 | 8.849751  |
| ENSMUSG Higd2a    | 44.45928 | 52.33263 | 51.36832 | 50.89556 | 52.0065  | 53.677219 |
| ENSMUSG Gm14632   | 0        | 0        | 0        | 0        | 0        | 0         |
| ENSMUSG Nup153    | 15.8249  | 16.13538 | 14.28452 | 15.87599 | 15.10083 | 14.41655  |
| ENSMUSG Gm10488   | 0        | 0        | 0        | 0        | 0        | 0         |
| ENSMUSG Tpm1      | 0.761027 | 1.02434  | 0.962805 | 1.027897 | 1.219291 | 1.185512  |
| ENSMUSG Mcur1     | 7.889303 | 8.352153 | 7.668588 | 8.079399 | 8.620828 | 7.779651  |
| ENSMUSG Cap2      | 1.140417 | 1.551562 | 1.272319 | 1.271447 | 1.060799 | 1.036758  |
| ENSMUSG Id4       | 3.757796 | 3.492445 | 2.398332 | 3.008459 | 3.110351 | 2.507498  |
| ENSMUSG Dmrtc1a   | 0.263712 | 0.158393 | 0.303868 | 0.167457 | 0.17756  | 0         |
| Mus_musc Mus_musc | 3.301718 | 2.585597 | 1.129647 | 53.09071 | 90.41155 | 132.56946 |
| Mus_musc Mus_musc | 0.325026 | 0.438622 | 0.670133 | 33.03523 | 48.90919 | 27.776138 |
| ENSMUSG Rps4x     | 451.7539 | 449.0467 | 464.5771 | 442.1733 | 457.5632 | 448.99387 |
| ENSMUSG Chic1     | 1.356095 | 1.059304 | 1.713047 | 0.671879 | 0.684294 | 0.783422  |
| Mus_musc Mus_musc | 0        | 0.16676  | 0.267654 | 77.96413 | 1.287355 | 98.186089 |

|                   |          |          |          |          |          |           |
|-------------------|----------|----------|----------|----------|----------|-----------|
| Mus_musc Mus_musc | 0.430587 | 0        | 0.211056 | 22.96307 | 0.713657 | 0.549029  |
| Mus_musc Mus_musc | 0.407721 | 0.95656  | 0.129288 | 7.903541 | 64.41705 | 6.264246  |
| ENSMUSG Tsx       | 0        | 0.04926  | 0.174137 | 0.084606 | 0        | 0         |
| ENSMUSG Flna      | 86.52328 | 76.3628  | 83.61831 | 81.68505 | 86.54115 | 92.269589 |
| Mus_musc Mus_musc | 1.067193 | 0.530298 | 0.469725 | 11.91459 | 103.6189 | 314.33356 |
| Mus_musc Mus_musc | 8.033013 | 5.958405 | 1.833567 | 1084.536 | 1592.725 | 709.9068  |
| ENSMUSG Cks2      | 3.113523 | 5.244174 | 4.024928 | 6.968944 | 6.404465 | 7.496274  |
| ENSMUSG Olfr170   | 0        | 0.122315 | 0.050279 | 0        | 0        | 0.042392  |
| ENSMUSG Noxa1     | 0.981258 | 0.755532 | 0.62095  | 1.772373 | 2.622827 | 2.052377  |
| ENSMUSG Fam135b   | 0.003018 | 0.003938 | 0        | 0        | 0        | 0.002956  |
| ENSMUSG Add1      | 73.79347 | 71.31927 | 70.47945 | 59.81482 | 57.31355 | 60.815133 |
| ENSMUSG Htt       | 5.509072 | 5.650253 | 4.642222 | 5.632516 | 6.156079 | 6.430286  |
| ENSMUSG Usp1      | 12.2061  | 12.51062 | 12.37236 | 11.60161 | 12.94741 | 11.595716 |
| ENSMUSG Hgfac     | 1.230256 | 0.876635 | 1.500798 | 1.962637 | 1.445701 | 1.919512  |
| ENSMUSG Lrpap1    | 49.15707 | 49.30988 | 50.48663 | 47.07183 | 44.73138 | 48.953072 |
| ENSMUSG Rgs12     | 35.72506 | 35.41357 | 41.99928 | 20.53082 | 20.4383  | 18.077744 |
| ENSMUSG Pcdh7     | 1.664854 | 1.61879  | 0.924557 | 1.688394 | 2.061397 | 1.641809  |
| ENSMUSG Dop1a     | 7.332174 | 7.946416 | 5.78683  | 6.00763  | 5.641805 | 5.049216  |
| ENSMUSG Slc4a3    | 2.14925  | 2.842321 | 2.040864 | 2.119341 | 1.463862 | 1.854835  |
| ENSMUSG Gabra6    | 0        | 0        | 0        | 0        | 0        | 0         |
| ENSMUSG Igfbp1    | 0        | 0        | 0        | 0        | 0        | 0         |
| ENSMUSG Tns3      | 62.55038 | 59.08688 | 59.0294  | 48.30635 | 46.48423 | 46.887505 |
| ENSMUSG Btg2      | 105.2012 | 70.5136  | 73.61157 | 47.19923 | 56.82948 | 52.729912 |
| ENSMUSG Zfp607a   | 1.843583 | 2.253375 | 2.182872 | 2.487045 | 1.727169 | 1.573034  |
| ENSMUSG Igfbp3    | 20.22506 | 24.08534 | 26.82017 | 10.56743 | 8.870883 | 11.208227 |
| ENSMUSG Castor1   | 8.618923 | 6.081687 | 7.263396 | 5.722964 | 5.494258 | 5.298397  |
| ENSMUSG Polr3a    | 5.032289 | 4.589729 | 4.393914 | 4.003719 | 4.124689 | 4.007543  |
| ENSMUSG Sat1      | 107.7058 | 100.0409 | 115.5438 | 114.8292 | 122.7078 | 133.96688 |
| ENSMUSG Acot9     | 17.92019 | 16.16893 | 20.70579 | 17.2397  | 15.39969 | 16.395049 |
| ENSMUSG Prdx4     | 25.39545 | 24.86429 | 23.13649 | 54.80568 | 56.37439 | 58.297462 |
| ENSMUSG 493343610 | 0        | 0        | 0        | 0        | 0        | 0         |
| ENSMUSG Phldb1    | 25.08461 | 24.7994  | 27.54617 | 16.62598 | 16.96947 | 18.821472 |
| Mus_musc Mus_musc | 13.27646 | 10.18123 | 13.91232 | 13.35253 | 10.34573 | 11.202763 |
| ENSMUSG Nckap1l   | 11.11469 | 10.14151 | 12.94131 | 27.56411 | 25.48052 | 29.753925 |
| ENSMUSG Pde1b     | 2.829552 | 2.215224 | 2.806104 | 3.706927 | 3.828216 | 3.410926  |
| ENSMUSG Jaml      | 4.152543 | 3.892201 | 6.8657   | 5.477793 | 4.807594 | 3.909449  |
| ENSMUSG Col2a1    | 0        | 0.03628  | 0        | 0.009069 | 0.043893 | 0         |
| Mus_musc Mus_musc | 0.388744 | 0        | 0        | 0        | 0.118528 | 0         |
| Mus_musc Mus_musc | 0.213308 | 0        | 0        | 0.213669 | 0.161596 | 0.298321  |
| ENSMUSG Gtsf1     | 0        | 0        | 0        | 0.184252 | 0        | 0.23816   |
| ENSMUSG Hoxc10    | 0        | 0        | 0        | 0        | 0        | 0         |
| Mus_musc Mus_musc | 2.501631 | 1.59122  | 1.944878 | 1.194919 | 0.775281 | 0.877422  |
| ENSMUSG Trpc4ap   | 36.04456 | 32.52558 | 32.83033 | 33.97683 | 35.61917 | 37.275063 |
| ENSMUSG Serpinb9f | 0        | 0        | 0        | 0        | 0        | 0         |
| ENSMUSG 1700066M  | 2.398526 | 2.576883 | 2.153094 | 2.048219 | 2.206483 | 2.088077  |
| ENSMUSG Tollip    | 35.37943 | 35.73375 | 34.38205 | 28.51267 | 29.77596 | 30.07499  |
| ENSMUSG Sirt7     | 20.52848 | 19.92875 | 24.92117 | 23.34025 | 21.19075 | 25.298295 |
| ENSMUSG Mtap      | 7.641894 | 6.903753 | 7.848585 | 7.492587 | 7.155817 | 8.547736  |
| ENSMUSG Ints4     | 12.20629 | 12.8943  | 10.73123 | 10.80305 | 11.7271  | 12.225646 |
| ENSMUSG Arhgdia   | 277.2273 | 252.0068 | 293.5021 | 230.6452 | 225.6368 | 239.26507 |
| ENSMUSG P4hb      | 167.0332 | 166.0209 | 169.039  | 182.7261 | 210.669  | 212.09189 |
| ENSMUSG Pcyt2     | 17.34955 | 16.54685 | 20.61888 | 21.18518 | 18.61097 | 22.713311 |
| ENSMUSG Anapc11   | 26.43689 | 26.54869 | 27.64714 | 24.97119 | 24.90709 | 27.81759  |
| ENSMUSG Alyref    | 5.407684 | 5.921859 | 6.370086 | 5.389815 | 4.838877 | 5.866979  |
| ENSMUSG Armcx4    | 16.53768 | 14.07149 | 17.37408 | 12.67379 | 16.15098 | 13.56251  |
| ENSMUSG Arhgap23  | 21.22671 | 17.19607 | 18.64401 | 9.550414 | 11.31732 | 11.075983 |
| ENSMUSG Olfr466   | 0        | 0        | 0        | 0        | 0        | 0         |
| ENSMUSG Sertad2   | 18.30718 | 17.24476 | 17.52064 | 13.06481 | 12.55397 | 12.528988 |
| ENSMUSG Krtap9-3  | 0        | 0        | 0        | 0        | 0        | 0         |
| ENSMUSG Zfp24     | 10.97912 | 11.14327 | 10.13467 | 8.773284 | 8.66085  | 8.879052  |
| ENSMUSG Dcun1d5   | 10.36396 | 13.48837 | 14.59493 | 15.10971 | 14.58033 | 15.149534 |
| ENSMUSG Kif6      | 0.637671 | 0.830067 | 0.408946 | 0.729013 | 0.628244 | 0.904831  |
| ENSMUSG Birc3     | 16.57959 | 16.19412 | 15.88396 | 23.0041  | 24.29944 | 22.655053 |
| ENSMUSG Pdgfd     | 10.51121 | 11.81789 | 10.72193 | 7.424983 | 6.818519 | 6.565804  |

|                   |          |          |          |          |          |           |
|-------------------|----------|----------|----------|----------|----------|-----------|
| ENSMUSG C130026I2 | 3.263982 | 2.071203 | 4.517967 | 13.91918 | 12.3501  | 13.724392 |
| ENSMUSG Trem1l1   | 1.681854 | 1.98945  | 1.767537 | 0.827298 | 0.826888 | 0.588352  |
| ENSMUSG Efemp2    | 24.60963 | 19.84691 | 24.61274 | 21.69153 | 20.12438 | 24.722925 |
| ENSMUSG Foxp4     | 13.91505 | 14.27168 | 13.33601 | 14.34563 | 13.25715 | 14.587328 |
| ENSMUSG Tfeb      | 12.3174  | 12.19988 | 13.45179 | 13.05871 | 12.84832 | 12.301917 |
| ENSMUSG Tspo2     | 0.042681 | 0.048423 | 0        | 0        | 0        | 0         |
| ENSMUSG Nfya      | 18.53794 | 18.42171 | 19.67273 | 19.15656 | 20.1029  | 20.449608 |
| ENSMUSG Mfap1a    | 20.31679 | 21.91659 | 19.58964 | 16.07301 | 16.23839 | 18.12784  |
| ENSMUSG Pcgf2     | 8.410947 | 8.134779 | 8.616001 | 6.538168 | 5.573789 | 6.367575  |
| ENSMUSG Atat1     | 6.531195 | 6.251653 | 6.53348  | 10.67646 | 10.52357 | 11.721618 |
| ENSMUSG Spry4     | 12.57933 | 8.74537  | 13.14409 | 5.015778 | 6.299432 | 6.148415  |
| ENSMUSG Ttc39c    | 1.229053 | 1.361405 | 1.199192 | 2.41543  | 1.864262 | 2.503629  |
| ENSMUSG Ndfip1    | 138.3262 | 94.46672 | 92.37173 | 87.36469 | 116.9505 | 120.79034 |
| ENSMUSG Pwwp2b    | 22.01175 | 19.41159 | 19.60733 | 14.65376 | 13.06564 | 14.972124 |
| ENSMUSG Impact    | 9.479764 | 10.04925 | 9.417788 | 9.120943 | 8.359395 | 9.414949  |
| ENSMUSG Zfp521    | 2.200113 | 2.444559 | 1.57283  | 2.269265 | 2.566237 | 2.209047  |
| ENSMUSG Lama3     | 19.18043 | 17.09445 | 17.51467 | 12.48526 | 13.07865 | 13.709057 |
| ENSMUSG Armh1     | 0.828219 | 0.595763 | 0.356091 | 1.285123 | 1.549262 | 0.884766  |
| ENSMUSG Gn1       | 19.33092 | 19.02033 | 20.05887 | 16.4431  | 15.10918 | 16.491873 |
| ENSMUSG Sptbn4    | 0.045294 | 0.005955 | 0.031231 | 0.037322 | 0.029155 | 0.024279  |
| Mus_musc Mus_musc | 0.193015 | 0.189366 | 0.053926 | 0.633696 | 0.244482 | 0.226827  |
| ENSMUSG Sf3a2     | 17.05431 | 15.78077 | 16.08699 | 14.1509  | 13.06217 | 12.689587 |
| Mus_musc Mus_musc | 0.066837 | 0.031074 | 0        | 0.087605 | 0.114921 | 0.204347  |
| ENSMUSG Nebl      | 42.19597 | 44.84196 | 36.63688 | 31.63123 | 33.34987 | 26.844637 |
| ENSMUSG B430305JC | 0        | 0        | 0        | 0        | 0        | 0         |
| ENSMUSG Cdkn1c    | 30.63894 | 35.20928 | 35.92213 | 15.0303  | 18.1774  | 15.007512 |
| ENSMUSG Fam110b   | 1.02896  | 0.770056 | 1.078192 | 0.927164 | 0.839069 | 1.030468  |
| ENSMUSG Ubqln1    | 38.99284 | 42.71278 | 38.52658 | 34.16953 | 36.69037 | 34.727544 |
| ENSMUSG Otr       | 0.023984 | 0        | 0.009302 | 0.016647 | 0.031711 | 0.03567   |
| ENSMUSG Agr1a     | 8.641324 | 10.04495 | 10.73569 | 4.300866 | 4.840748 | 3.846391  |
| ENSMUSG Cspg4     | 4.219327 | 3.554224 | 4.852593 | 2.617463 | 2.954226 | 3.116651  |
| ENSMUSG Lrig2     | 3.935934 | 3.993538 | 3.925313 | 3.404848 | 3.128576 | 3.123799  |
| ENSMUSG Adgre4    | 2.15334  | 1.267935 | 3.320992 | 2.894171 | 1.688413 | 2.37337   |
| ENSMUSG Aldoart1  | 0        | 0        | 0        | 0.038161 | 0        | 0         |
| ENSMUSG Hsd17b12  | 34.92575 | 33.59342 | 33.06513 | 32.10383 | 35.01064 | 33.523495 |
| ENSMUSG Ttc17     | 13.46829 | 12.92335 | 11.81529 | 12.8132  | 12.72533 | 10.977309 |
| ENSMUSG Api5      | 33.06588 | 35.06379 | 30.62587 | 32.08819 | 31.48005 | 32.353085 |
| ENSMUSG Gatm      | 8.034625 | 6.235024 | 9.040701 | 34.05793 | 39.30741 | 34.282848 |
| ENSMUSG Ext2      | 31.91514 | 30.04041 | 33.87099 | 26.59051 | 28.77182 | 28.538587 |
| ENSMUSG Apba2     | 0.285155 | 0.144273 | 0.073353 | 0.065289 | 0.12879  | 0.090623  |
| ENSMUSG Fam189a1  | 0.127639 | 0.107962 | 0.069918 | 0.048678 | 0.011666 | 0.062482  |
| ENSMUSG Pcsk6     | 2.550268 | 2.422364 | 2.433297 | 2.077812 | 1.521986 | 1.86328   |
| ENSMUSG Snrpa1    | 14.36453 | 11.94977 | 14.1079  | 12.61299 | 13.89239 | 13.964384 |
| ENSMUSG Cers3     | 0.113455 | 0.225007 | 0.138112 | 0.283992 | 0.148722 | 0.075545  |
| ENSMUSG Tjp1      | 89.44415 | 86.13471 | 72.00214 | 55.58747 | 59.8552  | 51.826724 |
| ENSMUSG Tarsl2    | 3.384065 | 2.978119 | 2.383233 | 3.242354 | 3.062263 | 3.456481  |
| ENSMUSG Dgkd      | 23.98411 | 23.92987 | 21.39347 | 22.38339 | 22.86893 | 22.717256 |
| ENSMUSG Cacna1f   | 0        | 0.005026 | 0.059304 | 0.048005 | 0.068148 | 0.066597  |
| ENSMUSG Fryl      | 10.32232 | 9.945921 | 9.837805 | 10.03825 | 9.998397 | 10.968404 |
| ENSMUSG Stat5a    | 4.46493  | 3.829648 | 4.189589 | 5.956402 | 6.279152 | 6.16847   |
| ENSMUSG Stat3     | 50.80568 | 47.53486 | 56.94101 | 46.09867 | 46.57273 | 47.313364 |
| ENSMUSG Rmdn3     | 15.41771 | 14.72123 | 19.17471 | 14.87599 | 13.99905 | 13.533211 |
| ENSMUSG Tmem35b   | 5.033745 | 4.621079 | 4.582547 | 7.132492 | 7.678382 | 7.051737  |
| ENSMUSG Cavin1    | 204.6595 | 189.5411 | 195.559  | 124.2074 | 123.7552 | 127.90153 |
| Mus_musc Mus_musc | 0.775429 | 1.046418 | 0.493184 | 1.80103  | 2.109231 | 1.75432   |
| Mus_musc Mus_musc | 0        | 0        | 0        | 0        | 0        | 0.368372  |
| Mus_musc Mus_musc | 1.665786 | 2.08936  | 1.542858 | 1.245238 | 1.551692 | 1.075738  |
| Mus_musc Mus_musc | 8.497561 | 6.528076 | 4.775247 | 260.9455 | 197.2022 | 318.37981 |
| Mus_musc Mus_musc | 0.901325 | 1.064165 | 1.124305 | 18.11463 | 6.394634 | 6.65029   |
| Mus_musc Mus_musc | 0.343606 | 0.393493 | 0.379785 | 0.329195 | 0.202641 | 0.34089   |
| Mus_musc Mus_musc | 0.125402 | 0.185737 | 0.277078 | 0.371755 | 0.156028 | 0.246793  |
| Mus_musc Mus_musc | 0        | 0.320562 | 0.078453 | 0        | 0.192183 | 0.211558  |
| ENSMUSG Slc4a1    | 1.133957 | 1.26449  | 2.016733 | 0.515214 | 0.564185 | 0.523138  |
| ENSMUSG Rundc3a   | 0.872826 | 1.114288 | 0.858423 | 0.95587  | 0.977352 | 1.590214  |

|                   |          |          |          |          |          |           |
|-------------------|----------|----------|----------|----------|----------|-----------|
| ENSMUSG Adam1a    | 0.89588  | 1.47544  | 1.692948 | 0.51211  | 1.190889 | 0.735354  |
| ENSMUSG Vmn1r35   | 0        | 0        | 0        | 0        | 0        | 0         |
| ENSMUSG Defb2     | 0        | 0        | 0        | 0        | 0        | 0         |
| ENSMUSG Lymr9     | 1.509747 | 1.654998 | 1.271103 | 1.039914 | 0.963942 | 0.973005  |
| ENSMUSG Pcdha4    | 0        | 0.038026 | 0.024477 | 0.030221 | 0        | 0         |
| ENSMUSG Pkn2      | 16.9076  | 18.58018 | 16.54518 | 13.49859 | 13.44047 | 13.735109 |
| Mus_musc Mus_musc | 0.151367 | 0        | 0.171052 | 0.269274 | 0.223764 | 0         |
| Mus_musc Mus_musc | 0        | 0        | 0        | 0        | 0.186692 | 0         |
| Mus_musc Mus_musc | 0        | 0.06757  | 0.065056 | 0.078091 | 0.243222 | 0.102103  |
| Mus_musc Mus_musc | 0        | 0        | 0        | 0.074382 | 0        | 0         |
| Mus_musc Mus_musc | 0.149711 | 0.149231 | 0.127664 | 0.396052 | 0.189292 | 0.564216  |
| Mus_musc Mus_musc | 0.104556 | 0.13355  | 0.056817 | 0.406558 | 0.321479 | 0.680911  |
| ENSMUSG C1qtnf3   | 0.74475  | 0.482809 | 0.57259  | 0.810604 | 0.345038 | 0.6264    |
| ENSMUSG Stk11     | 40.45812 | 39.36521 | 42.75827 | 39.18045 | 37.66398 | 37.397954 |
| ENSMUSG Btd35f25  | 0        | 0        | 0        | 0        | 0        | 0         |
| ENSMUSG Gm20816   | 0        | 0        | 0        | 0        | 0        | 0         |
| ENSMUSG Vmn1r175  | 0        | 0        | 0        | 0        | 0        | 0         |
| ENSMUSG Stard3nl  | 36.11837 | 37.10142 | 37.73956 | 33.64145 | 30.09179 | 30.679493 |
| ENSMUSG A430078G  | 1.579282 | 1.04768  | 1.225805 | 2.11735  | 1.089408 | 1.40583   |
| ENSMUSG Clec4g    | 0.603953 | 0.516352 | 1.182502 | 0.520995 | 0.363825 | 0.265137  |
| ENSMUSG Olfr444   | 0        | 0        | 0        | 0        | 0        | 0         |
| ENSMUSG Olfr446   | 0        | 0        | 0        | 0        | 0        | 0         |
| ENSMUSG Gm10471   | 0        | 0        | 0        | 0        | 0        | 0         |
| ENSMUSG Gm7347    | 0        | 0        | 0        | 0        | 0        | 0         |
| ENSMUSG Speer4a   | 0        | 0        | 0        | 0        | 0        | 0         |
| Mus_musc Mus_musc | 0.356031 | 0.209545 | 0.220049 | 0.515869 | 0.276326 | 0.478556  |
| Mus_musc Mus_musc | 0.624148 | 0.325953 | 0.319827 | 0.276931 | 0.217945 | 0.311397  |
| Mus_musc Mus_musc | 0        | 0        | 0        | 0        | 0.127258 | 0         |
| Mus_musc Mus_musc | 0        | 0.078499 | 0.168936 | 0        | 0        | 0         |
| Mus_musc Mus_musc | 0        | 0        | 0.333837 | 0.124892 | 0.089327 | 0.169521  |
| Mus_musc Mus_musc | 0.188031 | 0        | 0        | 0        | 0        | 0         |
| Mus_musc Mus_musc | 0.189229 | 0.184042 | 0        | 0.297327 | 0        | 0.803298  |
| Mus_musc Mus_musc | 0.1533   | 0        | 0        | 0        | 0        | 0.143712  |
| ENSMUSG Slfn9     | 0.521918 | 0.906634 | 0.94447  | 1.535319 | 2.33791  | 2.234172  |
| ENSMUSG Wfdc17    | 4.080953 | 6.875303 | 5.453183 | 52.16436 | 49.41357 | 57.155788 |
| Mus_musc Mus_musc | 0        | 1.277506 | 0.397865 | 0.31012  | 0.239568 | 0.82144   |
| ENSMUSG Ncoa2     | 13.86042 | 13.71647 | 11.8638  | 12.90707 | 12.88614 | 12.616234 |
| ENSMUSG Ergic3    | 66.73899 | 66.80249 | 70.49613 | 68.84847 | 65.31414 | 70.527625 |
| ENSMUSG Spo11     | 0.100452 | 0        | 0.037218 | 0.13349  | 0        | 0         |
| ENSMUSG Uqcc1     | 7.985748 | 8.433201 | 7.183726 | 6.375507 | 6.489612 | 7.917806  |
| Mus_musc Mus_musc | 1.958358 | 1.789422 | 2.494549 | 3.116432 | 3.406974 | 2.345524  |
| Mus_musc Mus_musc | 0        | 0        | 0        | 0.174016 | 0        | 0         |
| Mus_musc Mus_musc | 0        | 0        | 0        | 0        | 0.220494 | 0         |
| Mus_musc Mus_musc | 0        | 0.154309 | 0        | 0        | 0        | 0         |
| Mus_musc Mus_musc | 0.07453  | 0.17904  | 0.178806 | 0.352114 | 0.204469 | 0.365544  |
| Mus_musc Mus_musc | 0        | 0.357582 | 0        | 0.097047 | 0        | 0         |
| Mus_musc Mus_musc | 8.940249 | 8.118541 | 8.651538 | 9.510512 | 8.152877 | 8.549097  |
| Mus_musc Mus_musc | 8.490049 | 8.941689 | 9.478395 | 7.67552  | 7.542631 | 7.213628  |
| Mus_musc Mus_musc | 0.637101 | 0.14238  | 1.315383 | 0.294143 | 0.134255 | 0.037002  |
| Mus_musc Mus_musc | 2.284244 | 2.279164 | 2.622422 | 1.635416 | 1.033846 | 2.265995  |
| Mus_musc Mus_musc | 0.241685 | 0.403036 | 0.354797 | 0.402981 | 0.189325 | 0.289299  |
| Mus_musc Mus_musc | 1.87332  | 1.792284 | 3.106651 | 2.250025 | 1.399988 | 0.862492  |
| Mus_musc Mus_musc | 0        | 0        | 0        | 0.89574  | 0.25188  | 0.502684  |
| Mus_musc Mus_musc | 0        | 0        | 0        | 0        | 0        | 0         |
| Mus_musc Mus_musc | 1.415267 | 1.9916   | 1.493401 | 1.667424 | 1.274794 | 1.201765  |
| ENSMUSG Serpinb6e | 0        | 0        | 0        | 0        | 0        | 0         |
| ENSMUSG Zfp316    | 1.791779 | 1.719636 | 1.710871 | 1.773145 | 1.597475 | 1.701542  |
| ENSMUSG Olfr1440  | 0        | 0        | 0        | 0        | 0        | 0         |
| ENSMUSG Tas2r143  | 0        | 0        | 0        | 0        | 0        | 0         |
| ENSMUSG Mtmr9     | 18.54332 | 18.12417 | 17.27636 | 14.81949 | 15.77732 | 15.889071 |
| Mus_musc Mus_musc | 0        | 0        | 0        | 0        | 0        | 0.28929   |
| ENSMUSG Elavl2    | 0.056184 | 0.076363 | 0.021404 | 0.08729  | 0.026149 | 0         |
| ENSMUSG Rnf151    | 0.092049 | 0.076444 | 0.113237 | 0.341188 | 0.092956 | 0.226418  |
| ENSMUSG Abhd2     | 49.20081 | 46.40987 | 43.10612 | 31.51042 | 32.39057 | 31.066868 |

|                   |          |          |          |          |          |           |
|-------------------|----------|----------|----------|----------|----------|-----------|
| ENSMUSG Clstn3    | 0.389132 | 0.283366 | 0.139749 | 0.119193 | 0.090555 | 0.22979   |
| ENSMUSG Ghitm     | 64.51428 | 70.61968 | 65.00246 | 62.166   | 65.0359  | 62.746762 |
| ENSMUSG Iffo2     | 4.018308 | 3.607559 | 3.863391 | 3.956228 | 3.494521 | 4.329618  |
| ENSMUSG Map7d2    | 0.115483 | 0.10562  | 0.098324 | 0.068042 | 0.052554 | 0.039798  |
| Mus_musc Mus_musc | 10.37552 | 10.68569 | 12.20311 | 10.62155 | 10.75215 | 11.314864 |
| ENSMUSG Tlcd1     | 4.213129 | 4.772769 | 5.117748 | 5.416729 | 4.727854 | 5.432784  |
| Mus_musc Mus_musc | 0        | 0.034963 | 0.022239 | 0.024398 | 0        | 0.442417  |
| Mus_musc Mus_musc | 3.148318 | 2.976616 | 3.901077 | 2.331675 | 3.717209 | 2.867985  |
| Mus_musc Mus_musc | 0        | 0        | 0        | 0        | 0        | 0         |
| Mus_musc Mus_musc | 0.953837 | 1.987728 | 1.35032  | 1.927025 | 1.445113 | 1.913667  |
| Mus_musc Mus_musc | 0.779466 | 0.546597 | 0.270455 | 0.818493 | 0.511552 | 0.848598  |
| Mus_musc Mus_musc | 7.92105  | 8.538149 | 10.82385 | 10.66192 | 5.840112 | 6.872449  |
| ENSMUSG Gm12394   | 0.109348 | 0.107897 | 0.1015   | 0.024585 | 0.103757 | 0.056719  |
| ENSMUSG Mapk13    | 3.442842 | 3.795995 | 3.578755 | 5.955396 | 5.021864 | 7.200108  |
| ENSMUSG Srpk1     | 10.48807 | 9.782052 | 10.40927 | 10.79552 | 8.840937 | 9.898709  |
| ENSMUSG Myt1      | 0.009591 | 0.008263 | 0        | 0.018953 | 0        | 0.016015  |
| ENSMUSG Olfr113   | 0        | 0        | 0        | 0        | 0        | 0         |
| Mus_musc Mus_musc | 0.776862 | 0.758452 | 0.602117 | 0.643587 | 0.561812 | 0.546566  |
| ENSMUSG Preb      | 12.58849 | 14.62047 | 14.6694  | 15.69484 | 16.60986 | 13.96743  |
| ENSMUSG Olfr734   | 0        | 0        | 0        | 0        | 0        | 0         |
| ENSMUSG Gm12253   | 0        | 0        | 0        | 0        | 0        | 0         |
| ENSMUSG Tox4      | 12.26931 | 12.37137 | 12.30932 | 11.47278 | 12.13296 | 12.280382 |
| ENSMUSG Mrps18c   | 18.27778 | 17.63689 | 17.67877 | 15.83959 | 15.06753 | 16.834324 |
| Mus_musc Mus_musc | 0        | 0.244147 | 0.37555  | 0.497852 | 0.17544  | 0         |
| Mus_musc Mus_musc | 0        | 0        | 0        | 0        | 0        | 0.206179  |
| Mus_musc Mus_musc | 0        | 0        | 0        | 0        | 0        | 0         |
| Mus_musc Mus_musc | 0        | 0.154309 | 0        | 0        | 0        | 0         |
| ENSMUSG Fndc5     | 0.204909 | 1.759729 | 0.524907 | 0.915238 | 1.213399 | 0.445633  |
| Mus_musc Mus_musc | 0.890984 | 1.057746 | 0.915226 | 0.427618 | 0.636485 | 0.781811  |
| ENSMUSG Rpusd3    | 3.234633 | 2.964572 | 2.999251 | 2.79487  | 3.154928 | 3.309977  |
| ENSMUSG Gstm1     | 334.961  | 295.5745 | 278.1247 | 154.4554 | 154.387  | 161.95942 |
| ENSMUSG Amot      | 2.626804 | 3.029256 | 2.516983 | 2.043295 | 2.729382 | 2.244986  |
| ENSMUSG Vmn1r82   | 0        | 0        | 0        | 0        | 0        | 0         |
| ENSMUSG lapp      | 0        | 0        | 0        | 0        | 0        | 0         |
| ENSMUSG Fcho2     | 32.00901 | 33.39469 | 31.23817 | 24.81114 | 25.45637 | 21.604368 |
| ENSMUSG Bivm      | 3.693788 | 4.83274  | 3.975353 | 4.519164 | 4.945403 | 4.52678   |
| ENSMUSG Pex2      | 14.89951 | 14.26529 | 16.65919 | 15.74889 | 15.78686 | 15.906777 |
| ENSMUSG Vmn1r31   | 0        | 0        | 0        | 0        | 0        | 0         |
| ENSMUSG Etfrf1    | 9.776741 | 10.01444 | 8.371687 | 10.28191 | 9.436997 | 9.484688  |
| ENSMUSG Gpr63     | 0.341313 | 0.206332 | 0.281988 | 0.195309 | 0.229151 | 0.172762  |
| ENSMUSG Cacng5    | 0        | 0        | 0        | 0        | 0        | 0         |
| ENSMUSG Vmn1r214  | 0        | 0        | 0        | 0        | 0        | 0         |
| ENSMUSG Bub1b     | 0.935338 | 0.982607 | 0.795953 | 2.651683 | 2.810132 | 3.791636  |
| ENSMUSG Ces2c     | 0.657397 | 0.409156 | 0.4586   | 0.349416 | 0.587149 | 0.205754  |
| ENSMUSG Mettl8    | 3.623179 | 4.690508 | 3.950065 | 4.013923 | 3.4134   | 3.106564  |
| ENSMUSG Spidr     | 5.650149 | 6.311663 | 5.016252 | 4.724866 | 5.672748 | 4.483203  |
| ENSMUSG Arhgef11  | 16.14832 | 15.9528  | 15.06044 | 14.10127 | 14.97994 | 13.57409  |
| ENSMUSG Emilin3   | 0.037638 | 0.036195 | 0        | 0        | 0        | 0.062313  |
| ENSMUSG 4930563M  | 0        | 0        | 0        | 0.033312 | 0        | 0         |
| ENSMUSG 4930502E1 | 0.03953  | 0.031251 | 0.035516 | 0        | 0        | 0         |
| ENSMUSG 2310061N  | 0        | 0        | 0        | 0        | 0        | 0         |
| ENSMUSG Kxd1      | 23.80626 | 22.19589 | 26.51921 | 19.62254 | 23.52286 | 25.982064 |
| ENSMUSG Cstb      | 50.33957 | 47.19279 | 48.13294 | 99.9971  | 113.7447 | 111.10217 |
| ENSMUSG Ftl1      | 1800.057 | 1512.266 | 1602.079 | 2041.334 | 2169.76  | 2356.3022 |
| Mus_musc Mus_musc | 0        | 0        | 0        | 0        | 0        | 0.129596  |
| ENSMUSG Med16     | 11.17252 | 9.259505 | 11.3845  | 9.752143 | 9.239213 | 10.599888 |
| Mus_musc Mus_musc | 0        | 0        | 0        | 0.174016 | 0        | 0         |
| Mus_musc Mus_musc | 0        | 0.429304 | 0.098601 | 0        | 0        | 0         |
| Mus_musc Mus_musc | 0        | 0        | 0        | 0        | 0        | 0         |
| Mus_musc Mus_musc | 0        | 0        | 0        | 0        | 0        | 0         |
| ENSMUSG Galns     | 3.479875 | 3.143176 | 4.233985 | 6.402392 | 7.407167 | 8.135204  |
| ENSMUSG Ddx19a    | 18.37468 | 16.96735 | 16.18005 | 16.06579 | 15.13743 | 15.622133 |
| ENSMUSG 4930524N  | 0        | 0        | 0        | 0        | 0        | 0         |
| ENSMUSG Krt4      | 0        | 0        | 0        | 0.085215 | 0        | 0.154222  |

|                   |          |          |          |          |          |           |
|-------------------|----------|----------|----------|----------|----------|-----------|
| ENSMUSG Taf1b     | 5.160705 | 4.418278 | 5.669236 | 4.79259  | 4.232104 | 4.396232  |
| ENSMUSG Neto1     | 0.104054 | 0.074117 | 0.07832  | 0.077521 | 0.015862 | 0         |
| ENSMUSG Vtcn1     | 0.7565   | 1.101881 | 0.679675 | 2.543012 | 2.248069 | 2.782041  |
| ENSMUSG Rgs13     | 0.10649  | 0.029963 | 0        | 0.247425 | 0        | 0.182517  |
| ENSMUSG Olfr1204  | 0        | 0        | 0        | 0        | 0        | 0         |
| ENSMUSG Rtl3      | 0.019135 | 0.104426 | 0        | 0        | 0.016402 | 0.018681  |
| Mus_musc Mus_musc | 0.734132 | 0.915464 | 0.820432 | 0.680328 | 0.998491 | 0.79579   |
| Mus_musc Mus_musc | 0.960517 | 0.490939 | 0.355896 | 0.98272  | 0.691624 | 0.549333  |
| Mus_musc Mus_musc | 0        | 0.154309 | 0        | 0.126793 | 0        | 0.091751  |
| Mus_musc Mus_musc | 0        | 0.506974 | 0        | 0.098657 | 0        | 0         |
| Mus_musc Mus_musc | 0.100559 | 0.648616 | 0        | 0.252642 | 0.205156 | 0.564848  |
| Mus_musc Mus_musc | 0.188031 | 0.148328 | 0.06417  | 0        | 0        | 0         |
| Mus_musc Mus_musc | 0.279917 | 0.28159  | 0.252489 | 0.314385 | 1.247075 | 0.714113  |
| ENSMUSG Gm21767   | 0        | 0        | 0        | 0        | 0        | 0         |
| ENSMUSG Vmn1r124  | 0        | 0        | 0        | 0        | 0        | 0         |
| ENSMUSG Lig1      | 4.436401 | 3.650248 | 4.399024 | 5.221805 | 5.750958 | 7.008643  |
| ENSMUSG Olfr122   | 0        | 0        | 0        | 0        | 0        | 0         |
| ENSMUSG Olfr67    | 0        | 0        | 0        | 0        | 0        | 0         |
| ENSMUSG Mis18bp1  | 0.214993 | 0.232904 | 0.357092 | 0.519081 | 0.553244 | 0.797819  |
| ENSMUSG Rtp2      | 0        | 0        | 0        | 0        | 0        | 0         |
| ENSMUSG Fbxo28    | 8.451499 | 7.847505 | 8.019751 | 6.417044 | 6.812479 | 6.731799  |
| Mus_musc Mus_musc | 0        | 0.118304 | 0        | 0        | 0.170097 | 0.172248  |
| Mus_musc Mus_musc | 3.29733  | 2.450783 | 2.557194 | 1.798011 | 1.548902 | 2.398479  |
| Mus_musc Mus_musc | 0.145212 | 0.241395 | 0.191517 | 0        | 0.930689 | 0.539793  |
| Mus_musc Mus_musc | 0        | 0        | 0        | 0        | 0        | 0         |
| Mus_musc Mus_musc | 0        | 0        | 0        | 0.089954 | 0        | 0.098122  |
| Mus_musc Mus_musc | 0        | 0        | 0        | 0.174016 | 0        | 0         |
| Mus_musc Mus_musc | 0        | 0        | 0        | 0        | 0        | 0.222737  |
| Mus_musc Mus_musc | 0.029137 | 0        | 0        | 0.434442 | 0.388499 | 0.374489  |
| Mus_musc Mus_musc | 0.125069 | 0        | 0        | 0        | 0        | 0         |
| ENSMUSG Rarres2   | 241.9256 | 269.1887 | 231.8578 | 141.5656 | 103.5698 | 148.78724 |
| Mus_musc Mus_musc | 0        | 0        | 0        | 0        | 0        | 0         |
| Mus_musc Mus_musc | 0.099606 | 0        | 0        | 0.46467  | 0.436456 | 0.336513  |
| ENSMUSG Bloc1s2   | 14.03907 | 12.1399  | 14.13269 | 15.85529 | 13.4697  | 14.494596 |
| Mus_musc Mus_musc | 0.314177 | 0.438638 | 0.094991 | 0.291345 | 0.447244 | 0.296279  |
| ENSMUSG Fmo6      | 0.12702  | 0.213169 | 0        | 0.130745 | 0.096851 | 0.154677  |
| ENSMUSG Gm6619    | 0        | 0        | 0        | 0        | 0        | 0         |
| Mus_musc Mus_musc | 0.127062 | 0.18868  | 0.198417 | 0.190325 | 0.382061 | 0.100607  |
| ENSMUSG H2a2b     | 0        | 0        | 0        | 0        | 0        | 0         |
| ENSMUSG 1700010B( | 0        | 0        | 0        | 0        | 0        | 0.05921   |
| ENSMUSG Gm21760   | 0        | 0        | 0        | 0        | 0        | 0         |
| Mus_musc Mus_musc | 0        | 0.278661 | 0.252476 | 0.589934 | 0.177118 | 0         |
| ENSMUSG Gm35134   | 0        | 0        | 0        | 0        | 0        | 0         |
| Mus_musc Mus_musc | 0        | 0        | 0        | 0.288892 | 0        | 0         |
| Mus_musc Mus_musc | 0.030902 | 0.014608 | 0.005814 | 0.201306 | 0.124451 | 0.346037  |
| ENSMUSG Mob4      | 21.08108 | 19.8486  | 19.86034 | 17.08541 | 16.9132  | 14.648245 |
| ENSMUSG Zmat1     | 2.676749 | 3.008609 | 2.33543  | 1.986658 | 2.565417 | 2.844023  |
| ENSMUSG Zfp112    | 0.817787 | 1.272183 | 0.836434 | 0.670959 | 0.56288  | 0.846929  |
| ENSMUSG Gm9887    | 0.553364 | 0.495925 | 0.562889 | 0.40329  | 0.748649 | 1.159836  |
| ENSMUSG Amotl1    | 21.45487 | 23.2451  | 18.64191 | 14.48751 | 15.67536 | 14.716706 |
| ENSMUSG Gm44511   | 1.796912 | 1.279458 | 1.809521 | 0.655158 | 0.780587 | 0.434228  |
| ENSMUSG Prpmp5    | 0        | 0        | 0        | 0        | 0        | 0         |
| ENSMUSG Gm43951   | 0.154708 | 0.223585 | 0.087597 | 0.172209 | 0.147208 | 0.170415  |
| ENSMUSG Ugt2b5    | 0        | 0        | 0        | 0        | 0        | 0         |
| ENSMUSG Maip1     | 3.558405 | 3.28484  | 3.577803 | 2.998139 | 2.992771 | 2.68209   |
| ENSMUSG Ksr1      | 5.294571 | 5.841031 | 6.015822 | 5.233464 | 6.397112 | 5.892837  |
| ENSMUSG Gpx3      | 542.662  | 539.6701 | 645.5708 | 463.1551 | 533.7078 | 389.87008 |
| ENSMUSG Olfr745   | 0        | 0        | 0        | 0        | 0        | 0         |
| Mus_musc Mus_musc | 0        | 0        | 0        | 0        | 0        | 0         |
| Mus_musc Mus_musc | 0.309342 | 0.303641 | 0.256583 | 0.207931 | 0.232111 | 0.314651  |
| Mus_musc Mus_musc | 0        | 0        | 0        | 0.174016 | 0        | 0         |
| Mus_musc Mus_musc | 0        | 0.142178 | 0.083094 | 0.481063 | 0.406302 | 0         |
| Mus_musc Mus_musc | 3.001879 | 3.607635 | 2.913286 | 4.240481 | 4.520416 | 4.591697  |
| ENSMUSG Zfp143    | 6.287555 | 5.454216 | 5.615995 | 5.601231 | 6.008336 | 5.78974   |

|                   |          |          |          |          |          |           |
|-------------------|----------|----------|----------|----------|----------|-----------|
| ENSMUSG Ppy       | 0.164009 | 0.635575 | 0.648377 | 0.160443 | 0        | 0.769898  |
| ENSMUSG Mpp2      | 5.665307 | 6.279702 | 6.718177 | 3.248749 | 3.756813 | 3.367626  |
| Mus_musc Mus_musc | 0        | 0        | 0        | 0.174016 | 0        | 0.368372  |
| ENSMUSG Spint4    | 0        | 0        | 0        | 0        | 0        | 0         |
| ENSMUSG Pyy       | 0        | 0.07022  | 0        | 0        | 0        | 0         |
| ENSMUSG Ebpl      | 0.843123 | 0.885466 | 0.929986 | 0.858511 | 0.939474 | 0.936572  |
| ENSMUSG Kpna3     | 11.01939 | 11.61332 | 10.08364 | 11.27575 | 11.8891  | 10.944484 |
| ENSMUSG Itih4     | 16.08559 | 13.53192 | 10.31041 | 24.99561 | 35.55534 | 25.93296  |
| ENSMUSG OR5BS1P   | 0        | 0        | 0        | 0        | 0        | 0         |
| ENSMUSG Tgif2lx1  | 0        | 0        | 0        | 0        | 0        | 0         |
| ENSMUSG Pcdhb14   | 0.429499 | 0.49253  | 0.464453 | 0.259513 | 0.266415 | 0.292474  |
| ENSMUSG 181003711 | 38.77938 | 41.51624 | 46.41404 | 37.96837 | 38.1699  | 32.921864 |
| ENSMUSG Slc25a40  | 3.922311 | 3.483998 | 3.476863 | 3.571104 | 3.616895 | 2.954178  |
| ENSMUSG Scaf11    | 29.87725 | 29.35304 | 25.24157 | 23.35981 | 24.20704 | 23.624908 |
| ENSMUSG Rac2      | 17.57835 | 14.59556 | 26.75621 | 32.10447 | 29.41562 | 34.853127 |
| ENSMUSG Eipr1     | 3.849574 | 2.897198 | 3.131864 | 3.309391 | 2.803397 | 3.596502  |
| ENSMUSG Ttf2      | 1.197091 | 1.172891 | 1.367429 | 1.797643 | 1.743031 | 2.09196   |
| ENSMUSG Eepd1     | 3.174472 | 4.311564 | 3.740977 | 5.446105 | 4.78424  | 5.316103  |
| ENSMUSG Etl4      | 13.29617 | 12.78296 | 10.29995 | 9.849756 | 9.392285 | 9.577703  |
| ENSMUSG Puf60     | 66.19876 | 63.21286 | 66.33598 | 52.38506 | 52.74529 | 54.026312 |
| ENSMUSG Emc7      | 14.99443 | 16.07252 | 15.9986  | 12.79781 | 13.48328 | 12.100097 |
| ENSMUSG Obox7     | 0        | 0        | 0        | 0        | 0        | 0         |
| ENSMUSG Prr18     | 10.16185 | 11.33466 | 7.417057 | 7.528871 | 8.854003 | 8.993754  |
| ENSMUSG Gdf15     | 1.175548 | 0.899388 | 1.238318 | 0.605509 | 0.773958 | 0.934164  |
| ENSMUSG Mrps9     | 14.97284 | 15.02023 | 16.66237 | 18.61982 | 16.82388 | 17.710319 |
| ENSMUSG Hist1h4c  | 0.493009 | 0.630033 | 0.763715 | 0.380077 | 0.552564 | 0.559522  |
| ENSMUSG Pla2g16   | 8.467935 | 11.2052  | 11.38057 | 15.24715 | 13.40239 | 13.819836 |
| ENSMUSG Parp12    | 16.07666 | 15.64756 | 22.67896 | 14.49165 | 14.44476 | 13.572064 |
| ENSMUSG Skint7    | 0        | 0        | 0        | 0        | 0        | 0         |
| ENSMUSG Atp8b2    | 12.5192  | 11.434   | 11.94047 | 13.58557 | 13.25789 | 13.916631 |
| ENSMUSG Mesd      | 15.16373 | 15.13317 | 15.01592 | 13.53013 | 12.83798 | 12.660107 |
| ENSMUSG Far1      | 19.61198 | 21.03747 | 19.19829 | 22.58254 | 22.54015 | 21.731962 |
| ENSMUSG Tcea2     | 2.556805 | 1.6847   | 2.032265 | 1.980402 | 1.592269 | 1.956719  |
| ENSMUSG Psm1      | 63.20205 | 59.04173 | 64.50491 | 63.11073 | 59.58839 | 63.035156 |
| ENSMUSG Nsmce1    | 20.16234 | 19.70091 | 19.23429 | 18.68705 | 15.5819  | 19.098961 |
| ENSMUSG Thap12    | 25.36289 | 25.35923 | 21.98837 | 20.14725 | 20.99504 | 21.024217 |
| ENSMUSG Kdm8      | 2.157088 | 2.076942 | 2.090169 | 1.477499 | 1.505183 | 1.618125  |
| ENSMUSG Copb1     | 39.54662 | 39.96875 | 36.95042 | 40.05941 | 41.10223 | 38.895473 |
| ENSMUSG Zkscan2   | 0.170249 | 0.088239 | 0.124667 | 0.10853  | 0.098491 | 0.124092  |
| ENSMUSG Smyd4     | 2.200508 | 2.322295 | 2.4068   | 1.992156 | 1.60135  | 2.008269  |
| Mus_musc Mus_musc | 0        | 0.228916 | 0.215175 | 0.293857 | 0.286643 | 0.123804  |
| ENSMUSG Tcrg-C3   | 0        | 0        | 0        | 0        | 0        | 0         |
| ENSMUSG Klhdc7b   | 0        | 0.007811 | 0        | 0        | 0        | 0         |
| ENSMUSG Abca5     | 13.33405 | 11.01683 | 10.78459 | 5.724606 | 5.595921 | 5.431306  |
| ENSMUSG Gm17359   | 0.134206 | 0.017306 | 0.027583 | 0        | 0        | 0         |
| ENSMUSG Gpr87     | 0        | 0        | 0        | 0        | 0        | 0.03465   |
| ENSMUSG Dzank1    | 1.376307 | 1.463763 | 0.94642  | 1.167639 | 1.30187  | 1.132556  |
| ENSMUSG Itih2     | 0.976247 | 1.065033 | 0.528552 | 0.562746 | 0.702927 | 0.979693  |
| ENSMUSG Aagab     | 5.470848 | 5.53938  | 5.460365 | 6.534957 | 6.591996 | 7.187675  |
| ENSMUSG Pomk      | 3.684099 | 3.654136 | 3.065679 | 3.326728 | 3.607921 | 3.659051  |
| ENSMUSG Mex3c     | 16.23162 | 16.91614 | 15.8776  | 14.2568  | 13.73592 | 15.238677 |
| ENSMUSG Vmn2r16   | 0        | 0        | 0        | 0        | 0        | 0         |
| ENSMUSG Kcnb2     | 0.055491 | 0.054218 | 0.027676 | 0.028678 | 0.043061 | 0.018255  |
| ENSMUSG Gm6793    | 51.29074 | 50.93984 | 55.57642 | 45.20728 | 47.44765 | 46.164486 |
| ENSMUSG Gm3002    | 0.018337 | 0        | 0        | 0.050914 | 0        | 0         |
| ENSMUSG Zfp433    | 1.250987 | 1.16343  | 0.93038  | 1.022882 | 0.557987 | 1.403419  |
| ENSMUSG Olfr905   | 0        | 0        | 0        | 0        | 0        | 0         |
| ENSMUSG Gm6309    | 0        | 0        | 0        | 0        | 0        | 0         |
| ENSMUSG Gtse1     | 0.399843 | 0.329068 | 0.359899 | 0.970671 | 1.15782  | 1.759353  |
| ENSMUSG Khl33     | 1.758912 | 1.598051 | 1.43027  | 1.744339 | 1.242604 | 1.724328  |
| ENSMUSG Trmu      | 4.217823 | 4.533413 | 4.403413 | 4.176347 | 3.354404 | 3.553767  |
| ENSMUSG Rab11fip1 | 35.48051 | 35.43622 | 30.08531 | 25.66134 | 25.27183 | 24.868517 |
| ENSMUSG Adrb3     | 3.777443 | 2.85901  | 5.404051 | 2.94668  | 2.431207 | 2.103165  |
| ENSMUSG Adgra2    | 18.79253 | 17.8902  | 19.37976 | 12.19005 | 13.69785 | 14.614379 |

|                   |          |          |          |          |          |           |
|-------------------|----------|----------|----------|----------|----------|-----------|
| ENSMUSG Brf2      | 5.815575 | 4.580876 | 5.472526 | 4.716626 | 4.680625 | 4.620272  |
| ENSMUSG Plpbp     | 11.25078 | 10.56284 | 10.44674 | 10.36919 | 10.54093 | 10.119208 |
| ENSMUSG Tef       | 99.50714 | 89.22708 | 79.34084 | 40.24271 | 46.9926  | 37.95606  |
| ENSMUSG Ttl8      | 0.315598 | 0.251168 | 0.139076 | 0.057106 | 0.01887  | 0.096608  |
| ENSMUSG Thsd1     | 13.87945 | 12.40234 | 13.06378 | 7.922115 | 8.194508 | 7.870511  |
| ENSMUSG Vmn1r60   | 0        | 0        | 0        | 0        | 0        | 0         |
| ENSMUSG Ece1      | 126.7373 | 110.5269 | 116.0851 | 90.33695 | 93.90127 | 85.468541 |
| ENSMUSG St8sia1   | 0.264637 | 0.384992 | 0.27288  | 0.630492 | 0.560717 | 0.659309  |
| ENSMUSG Cmas      | 11.62691 | 11.7071  | 13.30106 | 15.47524 | 15.11548 | 15.717181 |
| ENSMUSG Il17rc    | 14.21345 | 12.91549 | 16.0204  | 11.50063 | 11.20497 | 11.10706  |
| ENSMUSG Itpr2     | 9.653293 | 8.041652 | 8.130598 | 6.946887 | 7.21052  | 8.254148  |
| ENSMUSG Emc3      | 39.23558 | 39.7707  | 41.41936 | 37.25892 | 37.83478 | 39.001617 |
| ENSMUSG Creld1    | 14.72306 | 15.13188 | 19.54605 | 11.94342 | 14.20409 | 13.172326 |
| ENSMUSG Zfp977    | 0.624528 | 0.514472 | 0.438997 | 0.424355 | 0.436533 | 0.169193  |
| ENSMUSG Mcoln2    | 1.053168 | 0.88274  | 0.813228 | 3.28565  | 2.191666 | 3.10738   |
| ENSMUSG Selplg    | 23.14408 | 18.79669 | 31.49159 | 40.34106 | 41.03569 | 41.789245 |
| ENSMUSG 119000710 | 3.543704 | 3.183956 | 2.947307 | 3.486219 | 3.652889 | 3.832392  |
| ENSMUSG Sec24c    | 31.19212 | 29.22838 | 30.30247 | 30.55406 | 30.13801 | 30.998588 |
| ENSMUSG Sectm1b   | 0        | 0.080022 | 0        | 0.09534  | 0.198937 | 0.1593    |
| ENSMUSG Hist1h2ba | 0.073695 | 0        | 0.030356 | 0        | 0.024309 | 0         |
| ENSMUSG Picalm    | 55.87912 | 57.82732 | 63.29918 | 55.97152 | 64.22743 | 61.285517 |
| ENSMUSG Bloc1s1   | 37.51373 | 38.56185 | 47.0674  | 42.76232 | 37.29533 | 39.809723 |
| ENSMUSG Klf6      | 68.33899 | 52.23661 | 64.49378 | 41.62236 | 42.98433 | 42.257275 |
| ENSMUSG Ccdc120   | 5.548115 | 5.258572 | 4.643021 | 5.097595 | 4.293776 | 4.634536  |
| ENSMUSG Gripap1   | 11.25436 | 10.61272 | 12.82412 | 12.88268 | 10.64954 | 12.254947 |
| ENSMUSG Otud5     | 18.82243 | 18.46232 | 20.05241 | 17.68152 | 19.2955  | 18.335438 |
| ENSMUSG Pim2      | 3.327169 | 3.120068 | 5.7374   | 5.581382 | 6.267439 | 5.54226   |
| ENSMUSG Slc35a2   | 7.880215 | 8.320975 | 9.105856 | 9.266114 | 10.43979 | 9.559367  |
| ENSMUSG Pqbp1     | 24.80228 | 24.65659 | 30.56755 | 24.35998 | 23.20341 | 25.120041 |
| ENSMUSG Timm17b   | 5.785303 | 7.142431 | 5.630519 | 6.632091 | 7.01384  | 7.029092  |
| ENSMUSG Zmynd12   | 1.04021  | 0.688489 | 0.619779 | 1.515331 | 1.072461 | 1.607226  |
| ENSMUSG Cited4    | 0.86368  | 0.369403 | 0.750812 | 1.156392 | 1.910869 | 1.353747  |
| ENSMUSG Pnmal2    | 0.879717 | 0.977168 | 1.089021 | 1.229904 | 0.824291 | 0.873808  |
| ENSMUSG Bicra     | 6.304698 | 5.275597 | 5.932836 | 5.917455 | 5.605924 | 5.380871  |
| ENSMUSG Mad2l1bp  | 7.456362 | 10.13892 | 10.55346 | 8.869214 | 7.807762 | 8.014564  |
| ENSMUSG Pcnx4     | 4.323586 | 4.567249 | 3.992099 | 3.647985 | 4.346263 | 4.318718  |
| ENSMUSG Ido2      | 0.060121 | 0        | 0.050846 | 0.056562 | 0.071038 | 0.073164  |
| ENSMUSG Crebbp    | 6.619905 | 7.281422 | 6.031084 | 5.908999 | 6.448975 | 5.912185  |
| ENSMUSG Tfr2      | 0.104421 | 0.041792 | 0.023037 | 0.042201 | 0.069949 | 0.046118  |
| ENSMUSG Pop7      | 5.382149 | 6.915368 | 7.330708 | 7.315132 | 6.786761 | 6.476624  |
| ENSMUSG Gigyf1    | 12.50768 | 10.943   | 12.47203 | 10.81514 | 9.873894 | 9.958279  |
| ENSMUSG Hrasls    | 0.028953 | 0        | 0        | 0.046786 | 0.066008 | 0         |
| ENSMUSG Actl6b    | 0        | 0        | 0        | 0        | 0        | 0         |
| ENSMUSG Epo       | 0        | 0.003557 | 0.020495 | 0.008583 | 0.016307 | 0.057481  |
| ENSMUSG Zfp251    | 6.36113  | 6.727662 | 6.419334 | 5.66473  | 5.835878 | 5.59639   |
| ENSMUSG Zfp263    | 10.15646 | 10.29785 | 9.712963 | 10.16363 | 8.985335 | 9.575288  |
| ENSMUSG Hes1      | 32.62717 | 27.3736  | 23.41619 | 17.56609 | 14.42287 | 13.527903 |
| ENSMUSG Pcolce    | 42.54881 | 44.30176 | 49.34035 | 41.34544 | 34.50137 | 36.060276 |
| Mus_musc Mus_musc | 0        | 0        | 0.176106 | 0        | 0.189168 | 0.126048  |
| Mus_musc Mus_musc | 0        | 0        | 0        | 0        | 0.234146 | 0         |
| Mus_musc Mus_musc | 0        | 0        | 0        | 0        | 0        | 0.184186  |
| Mus_musc Mus_musc | 0        | 0        | 0        | 0        | 0        | 0         |
| ENSMUSG Tnfsf9    | 0.653591 | 0.807193 | 0.967781 | 0.796427 | 1.051121 | 1.88898   |
| ENSMUSG Zswim4    | 5.490172 | 5.368561 | 5.027174 | 5.173604 | 5.229606 | 5.510674  |
| ENSMUSG Sbno2     | 17.32996 | 18.2061  | 23.85678 | 22.44562 | 21.5587  | 23.116386 |
| ENSMUSG Ostm1     | 18.77139 | 17.71915 | 19.8622  | 19.74935 | 21.59056 | 23.159307 |
| ENSMUSG Ndufa3    | 18.75246 | 19.52866 | 20.65617 | 20.9886  | 20.88692 | 22.739553 |
| ENSMUSG Dzip1     | 3.255441 | 3.424697 | 2.797542 | 2.421919 | 2.772804 | 2.345404  |
| ENSMUSG Sprr2i    | 0        | 0        | 0        | 0        | 0        | 0         |
| ENSMUSG Klh123    | 3.986657 | 3.955792 | 3.783702 | 2.599086 | 2.595942 | 2.467186  |
| ENSMUSG Cks1b     | 4.726677 | 4.63731  | 5.750793 | 11.12959 | 12.30377 | 11.534094 |
| ENSMUSG Thbs3     | 15.26079 | 15.46706 | 17.50781 | 10.42196 | 8.563092 | 9.515963  |
| ENSMUSG Efna4     | 0.942627 | 1.278866 | 1.199352 | 0.94169  | 0.910928 | 1.402764  |
| ENSMUSG Adam15    | 38.55331 | 37.84127 | 49.26983 | 41.63138 | 41.68637 | 44.389621 |



|                            |          |          |          |          |          |           |
|----------------------------|----------|----------|----------|----------|----------|-----------|
| ENSMUSG Zbtb7b             | 18.12443 | 18.13861 | 19.05833 | 20.48441 | 18.6806  | 19.789258 |
| ENSMUSG Gba                | 21.15189 | 21.85631 | 21.25029 | 27.05513 | 32.45256 | 31.55534  |
| ENSMUSG Scamp3             | 33.77321 | 36.12859 | 39.6712  | 33.03697 | 34.7709  | 34.666943 |
| ENSMUSG 49334141           | 0        | 0        | 0        | 0        | 0        | 0         |
| ENSMUSG Oip5               | 1.046756 | 0.460174 | 0.594137 | 1.106071 | 1.114644 | 0.889153  |
| ENSMUSG Hnf1b              | 6.074968 | 5.869504 | 4.510181 | 6.255215 | 5.707992 | 5.458182  |
| ENSMUSG Tpo                | 0        | 0        | 0        | 0        | 0        | 0         |
| ENSMUSG Sntg2              | 0.458107 | 0.585488 | 0.36604  | 0.519963 | 0.695349 | 0.285392  |
| ENSMUSG Rab10              | 48.90534 | 45.34543 | 42.7736  | 39.0059  | 40.62085 | 40.388878 |
| ENSMUSG Ddx52              | 8.097738 | 8.206581 | 7.452972 | 8.196166 | 8.385462 | 8.247064  |
| ENSMUSG Ccl11              | 1.575168 | 2.053226 | 0.859514 | 29.72186 | 44.46919 | 32.506744 |
| ENSMUSG Pxdn               | 35.01101 | 31.41628 | 31.89113 | 23.4885  | 23.0332  | 23.236629 |
| ENSMUSG Fam196b            | 0        | 0.023214 | 0        | 0.00797  | 0        | 0         |
| ENSMUSG Spdl1              | 0.451576 | 0.606519 | 0.43249  | 1.184491 | 1.480534 | 1.224673  |
| ENSMUSG Hba-a2             | 3904.508 | 3852.582 | 4996.812 | 1595.688 | 1660.555 | 1330.4401 |
| ENSMUSG Hba-a1             | 4532.65  | 4471.104 | 5825.524 | 1916.555 | 1955.496 | 1476.8312 |
| ENSMUSG Kcnab3             | 0.367173 | 0.125794 | 0.096915 | 0.234764 | 0.322555 | 0.178235  |
| ENSMUSG Kdm6b              | 18.75778 | 18.79065 | 17.13749 | 13.51837 | 13.56856 | 12.621228 |
| ENSMUSG Chd3               | 24.28828 | 26.87632 | 21.08513 | 24.42181 | 23.88114 | 23.580526 |
| ENSMUSG 1700125H           | 0        | 0.047922 | 0        | 0.090791 | 0        | 0         |
| ENSMUSG Fer1l4             | 0.027161 | 0.050273 | 0        | 0.082492 | 0.045985 | 0.1428    |
| ENSMUSG Olfr140            | 0        | 0        | 0        | 0        | 0        | 0         |
| ENSMUSG Olfr1264           | 0        | 0        | 0        | 0        | 0        | 0         |
| ENSMUSG Ptpn1              | 28.21671 | 29.13248 | 32.18958 | 31.76916 | 33.4924  | 32.788715 |
| ENSMUSG Olfr1272           | 0        | 0        | 0        | 0        | 0        | 0         |
| ENSMUSG Olfr1271           | 0        | 0        | 0        | 0        | 0        | 0         |
| ENSMUSG Olfr142            | 0        | 0        | 0        | 0        | 0        | 0         |
| ENSMUSG Nfatc2             | 1.26687  | 1.101004 | 1.244617 | 1.978604 | 1.615701 | 1.857416  |
| ENSMUSG Olfr1270           | 0        | 0        | 0        | 0        | 0        | 0         |
| ENSMUSG Olfr32             | 0        | 0        | 0        | 0        | 0        | 0.035455  |
| ENSMUSG Olfr1267- $\alpha$ | 0        | 0        | 0        | 0        | 0        | 0         |
| ENSMUSG Gm21627            | 0        | 0        | 0        | 0        | 0        | 0         |
| ENSMUSG Slc22a15           | 1.967385 | 1.858502 | 1.620965 | 1.467173 | 1.79386  | 2.061869  |
| ENSMUSG Phldb2             | 48.61088 | 46.63263 | 41.36248 | 31.76314 | 35.214   | 31.833356 |
| ENSMUSG Chst14             | 8.841401 | 6.925563 | 7.381295 | 6.617443 | 7.677813 | 7.11677   |
| ENSMUSG Gm815              | 0        | 0        | 0        | 0        | 0        | 0         |
| ENSMUSG Letm1              | 10.89577 | 9.821268 | 10.59951 | 9.483989 | 10.82838 | 10.453867 |
| ENSMUSG Ephx2              | 1.515016 | 2.399338 | 0.610495 | 1.564225 | 1.059422 | 1.070724  |
| ENSMUSG Inafm2             | 12.91159 | 12.21965 | 13.79953 | 7.708009 | 8.172758 | 8.356493  |
| ENSMUSG Zscan12            | 2.265831 | 2.033749 | 2.730886 | 2.415742 | 1.721728 | 1.880661  |
| ENSMUSG Olfr749            | 0        | 0        | 0        | 0        | 0        | 0         |
| ENSMUSG Rad51b             | 0.248239 | 0.567776 | 0.263717 | 0.218514 | 0.460115 | 0.610501  |
| ENSMUSG Fam205a1           | 0        | 0.087613 | 0.038306 | 0.00978  | 0.05689  | 0.015727  |
| ENSMUSG Ormdl2             | 13.37682 | 14.28754 | 16.38515 | 17.2605  | 18.50142 | 19.150551 |
| ENSMUSG Gdf11              | 0.96126  | 0.568721 | 0.807874 | 1.616344 | 1.323665 | 1.762519  |
| ENSMUSG Pex11b             | 13.8562  | 10.46423 | 11.52503 | 9.430759 | 8.998183 | 7.960072  |
| ENSMUSG Lamb3              | 21.71019 | 18.66519 | 21.19344 | 13.38663 | 13.65631 | 15.454776 |
| ENSMUSG Irf6               | 9.958008 | 11.17853 | 8.624739 | 7.23174  | 6.662325 | 7.426629  |
| ENSMUSG Mmp19              | 7.788002 | 6.859628 | 7.096839 | 55.80602 | 67.21744 | 84.377589 |
| ENSMUSG Batf3              | 0.722313 | 0.728586 | 1.672278 | 4.888311 | 5.220277 | 7.99681   |
| ENSMUSG Tatdn3             | 3.557817 | 3.551183 | 2.762138 | 3.3049   | 3.565339 | 3.427462  |
| ENSMUSG Angel2             | 16.79676 | 15.83155 | 16.0681  | 13.82959 | 13.77    | 13.090794 |
| ENSMUSG Traf5              | 13.80273 | 12.08346 | 16.19429 | 12.94074 | 13.5129  | 12.501249 |
| ENSMUSG Sbk1               | 5.267123 | 4.915291 | 4.6746   | 5.237763 | 4.451947 | 5.490668  |
| ENSMUSG Gm8879             | 0        | 0        | 0        | 0.168386 | 0.148342 | 0.318274  |
| ENSMUSG Esp18              | 0        | 0        | 0        | 0        | 0        | 0         |
| ENSMUSG Gm21762            | 0        | 0.030287 | 0.473643 | 0.811731 | 0.506984 | 0.498223  |
| ENSMUSG Gm3685             | 0        | 0        | 0        | 0        | 0        | 0         |
| ENSMUSG Tyr                | 0        | 0        | 0        | 0        | 0        | 0         |
| ENSMUSG Aqp1               | 417.3761 | 416.5682 | 430.2057 | 255.2122 | 267.7373 | 283.46817 |
| ENSMUSG Ghrhr              | 0        | 0        | 0        | 0        | 0        | 0         |
| Mus_musc Mus_musc          | 0        | 0        | 0        | 0        | 0        | 0         |
| Mus_musc Mus_musc          | 0        | 0        | 0        | 0        | 0.263507 | 0.240859  |
| Mus_musc Mus_musc          | 0        | 0        | 0        | 0        | 0        | 0         |

|                   |          |          |          |          |          |           |
|-------------------|----------|----------|----------|----------|----------|-----------|
| ENSMUSG Zfp81     | 2.173881 | 2.308011 | 2.265243 | 1.933397 | 2.029994 | 1.896013  |
| Mus_musc Mus_musc | 0.402163 | 0.478128 | 0.295815 | 0.55841  | 0.301048 | 0.3615    |
| ENSMUSG Tfam      | 6.122654 | 5.97669  | 5.723513 | 5.428428 | 5.705114 | 5.525596  |
| ENSMUSG BC147527  | 1.120532 | 0.586612 | 1.722689 | 1.487176 | 1.316845 | 0.791316  |
| ENSMUSG Mup12     | 0        | 0        | 0        | 0        | 0        | 0         |
| Mus_musc Mus_musc | 0.929459 | 0.128914 | 0        | 0.857004 | 0.334775 | 0.359648  |
| Mus_musc Mus_musc | 0.039549 | 0.194895 | 0.084722 | 0        | 0.58867  | 0.370132  |
| Mus_musc Mus_musc | 0.060352 | 0.464373 | 0.115525 | 0.244519 | 0.181883 | 0.25881   |
| Mus_musc Mus_musc | 0        | 0.371516 | 0.365875 | 0        | 0.152702 | 0.327331  |
| Mus_musc Mus_musc | 0.530156 | 0.484701 | 0        | 0.067258 | 0        | 0         |
| Mus_musc Mus_musc | 0.323684 | 0.048063 | 0        | 0        | 0.183632 | 0         |
| Mus_musc Mus_musc | 0        | 0        | 0        | 0        | 0        | 0         |
| Mus_musc Mus_musc | 0        | 0        | 0.097902 | 0.571334 | 0.122021 | 0         |
| Mus_musc Mus_musc | 0        | 0.17952  | 0.801376 | 0        | 0.305019 | 0         |
| ENSMUSG Gm2163    | 0        | 0        | 0        | 0        | 0        | 0         |
| ENSMUSG Vmn2r38   | 0        | 0        | 0        | 0        | 0        | 0         |
| ENSMUSG Gm21637   | 0        | 0        | 0        | 0        | 0        | 0         |
| ENSMUSG Olfr970   | 0        | 0        | 0        | 0        | 0        | 0         |
| ENSMUSG Cdk4      | 35.72297 | 35.15966 | 37.75763 | 37.31461 | 38.27215 | 37.549329 |
| ENSMUSG Col25a1   | 0.056513 | 0.076222 | 0.059472 | 0.026715 | 0.044326 | 0.060674  |
| ENSMUSG H2-M3     | 11.33026 | 9.51518  | 26.61775 | 19.43203 | 12.66373 | 15.210226 |
| ENSMUSG Zfp184    | 0.571121 | 0.64532  | 0.440407 | 0.379514 | 0.252723 | 0.315443  |
| ENSMUSG Syt14     | 0.030413 | 0.014243 | 0        | 0.010958 | 0.015642 | 0.013743  |
| Mus_musc Mus_musc | 1.310651 | 0.258778 | 0.286882 | 0.16788  | 0.110857 | 0.487613  |
| Mus_musc Mus_musc | 1.118946 | 1.054565 | 2.990508 | 0.777326 | 0.885283 | 0.67535   |
| Mus_musc Mus_musc | 0.034444 | 0.090598 | 0.222088 | 0.828876 | 1.217617 | 1.109356  |
| Mus_musc Mus_musc | 0        | 0        | 0        | 0        | 0        | 0         |
| Mus_musc Mus_musc | 0        | 0        | 0        | 0        | 0        | 0         |
| Mus_musc Mus_musc | 0.347569 | 0.117616 | 0.105748 | 0.368495 | 0.610097 | 0.551884  |
| Mus_musc Mus_musc | 0.280967 | 0.883426 | 0        | 6.359027 | 120.5582 | 526.88014 |
| Mus_musc Mus_musc | 0.22324  | 0        | 0        | 3.661152 | 32.99954 | 62.355652 |
| Mus_musc Mus_musc | 1.743939 | 1.823269 | 0.486021 | 762.5313 | 466.8856 | 171.29999 |
| Mus_musc Mus_musc | 0.854645 | 0.179123 | 0.063669 | 27.21954 | 31.49839 | 71.332214 |
| Mus_musc Mus_musc | 0.645995 | 0.6236   | 0.350499 | 15.92081 | 19.11403 | 5.380075  |
| Mus_musc Mus_musc | 0.543588 | 0.100015 | 0        | 60.35146 | 160.4246 | 150.90102 |
| Mus_musc Mus_musc | 1.590294 | 4.050328 | 0.836386 | 414.8303 | 727.7586 | 1364.1233 |
| Mus_musc Mus_musc | 0.055452 | 0        | 0.133609 | 0.12608  | 0.306242 | 0.111901  |
| Mus_musc Mus_musc | 0.203856 | 0.057293 | 0.061051 | 2.097817 | 13.4798  | 6.026957  |
| Mus_musc Mus_musc | 0.929011 | 1.802794 | 0.34571  | 138.6378 | 41.90511 | 65.893867 |
| ENSMUSG Ints14    | 10.89571 | 9.007115 | 9.679309 | 9.22183  | 9.838009 | 10.591883 |
| ENSMUSG Zdhhc14   | 6.170339 | 4.720511 | 5.556452 | 3.667285 | 4.392456 | 4.05111   |
| ENSMUSG Batf      | 4.185718 | 5.773994 | 7.10434  | 8.738526 | 9.541445 | 10.041718 |
| ENSMUSG Olfr78    | 0.133805 | 0.009531 | 0.082651 | 0.11312  | 0.150895 | 0.269934  |
| ENSMUSG Trim39    | 8.536215 | 7.164749 | 7.326064 | 7.550794 | 6.626396 | 8.148925  |
| ENSMUSG Kcnk13    | 1.349017 | 0.910893 | 1.559552 | 1.923114 | 1.980687 | 2.439391  |
| ENSMUSG Gmeb1     | 3.293485 | 3.750311 | 4.553074 | 3.222843 | 4.244123 | 4.96268   |
| ENSMUSG Sf3a3     | 18.31984 | 19.01298 | 19.85668 | 18.56107 | 16.91766 | 17.110651 |
| ENSMUSG Utp11     | 15.17737 | 16.21537 | 16.61408 | 16.74572 | 15.18305 | 17.364868 |
| ENSMUSG Epb41     | 44.03329 | 40.87958 | 46.01493 | 27.38785 | 32.56791 | 26.544424 |
| ENSMUSG Ptpru     | 10.51178 | 11.03371 | 8.674356 | 7.151924 | 7.921963 | 7.155617  |
| ENSMUSG Gpr84     | 0.075649 | 0.026836 | 0.07443  | 0.184407 | 0.556938 | 0.289359  |
| Mus_musc Mus_musc | 0        | 0.039385 | 0.060199 | 0.168709 | 0.059933 | 0         |
| Mus_musc Mus_musc | 0        | 0        | 0        | 0.112249 | 0        | 0         |
| Mus_musc Mus_musc | 0.167653 | 0        | 0        | 0        | 0.206819 | 0         |
| Mus_musc Mus_musc | 4.116791 | 4.638791 | 4.941707 | 5.035014 | 4.548506 | 5.339237  |
| Mus_musc Mus_musc | 0.834613 | 0.948254 | 1.067194 | 0.474653 | 0.630585 | 1.080757  |
| Mus_musc Mus_musc | 0        | 0.049178 | 0        | 0.305922 | 0.374978 | 0.196154  |
| Mus_musc Mus_musc | 0        | 0        | 0        | 0        | 0.411168 | 0         |
| ENSMUSG Mup6      | 0        | 0        | 0        | 0        | 0        | 0         |
| ENSMUSG Mup2      | 0        | 0        | 0        | 0        | 0        | 0         |
| ENSMUSG Mup1      | 0        | 0        | 0        | 0        | 0        | 0         |
| ENSMUSG Tm2d3     | 19.40108 | 19.16514 | 21.76342 | 18.02558 | 16.8763  | 21.110724 |
| ENSMUSG Mup10     | 0        | 0        | 0        | 0        | 0        | 0         |
| Mus_musc Mus_musc | 0        | 0.154309 | 0        | 0        | 0        | 0         |

|                   |          |          |          |          |          |           |
|-------------------|----------|----------|----------|----------|----------|-----------|
| ENSMUSG Mup9      | 0        | 0        | 0        | 0        | 0        | 0         |
| Mus_musc Mus_musc | 1.388626 | 0.836855 | 1.361342 | 0.659457 | 0.571338 | 0.563821  |
| Mus_musc Mus_musc | 0        | 0        | 0        | 0        | 0.186692 | 0         |
| ENSMUSG Naa20     | 21.03499 | 19.15017 | 21.02614 | 21.10964 | 22.60386 | 24.77693  |
| ENSMUSG Nudcd3    | 30.0037  | 28.06945 | 27.83727 | 22.83098 | 23.70363 | 23.428307 |
| ENSMUSG Kcng2     | 0.020053 | 0.508204 | 0        | 0.38014  | 0.134527 | 0.125519  |
| ENSMUSG H2-T24    | 41.11901 | 38.7153  | 86.05342 | 46.90413 | 35.90158 | 35.17561  |
| ENSMUSG Ntng1     | 0.034027 | 0.020714 | 0.009071 | 0.028406 | 0        | 0.019582  |
| ENSMUSG Hydin     | 1.487132 | 1.845026 | 0.67035  | 1.845307 | 1.820383 | 1.769252  |
| ENSMUSG Gm8279    | 0        | 0        | 0        | 0        | 0        | 0         |
| ENSMUSG Magee1    | 3.485096 | 3.540333 | 2.977559 | 2.826415 | 3.214369 | 3.147925  |
| ENSMUSG Gm8334    | 0        | 0        | 0        | 0        | 0        | 0         |
| ENSMUSG Gm3476    | 0        | 0        | 0        | 0        | 0        | 0         |
| ENSMUSG Ccdc82    | 22.1791  | 20.94469 | 20.91949 | 15.46931 | 14.99644 | 13.881815 |
| ENSMUSG Oprm1     | 0        | 0        | 0        | 0        | 0        | 0         |
| ENSMUSG Surf1     | 29.96472 | 29.19952 | 32.03953 | 26.21077 | 23.81141 | 23.665481 |
| ENSMUSG Sec61g    | 12.91348 | 10.50616 | 11.69517 | 21.72676 | 16.46218 | 21.606131 |
| ENSMUSG Wdr92     | 5.821743 | 6.779511 | 6.275446 | 6.905798 | 6.569435 | 6.25764   |
| ENSMUSG Gm15557   | 0        | 0        | 0        | 0        | 0        | 0         |
| ENSMUSG Gm21764   | 0        | 0        | 0        | 0        | 0        | 0         |
| ENSMUSG Il17ra    | 6.349663 | 5.148997 | 7.081709 | 6.242729 | 6.722309 | 6.558819  |
| ENSMUSG Optc      | 0.307434 | 0.232897 | 0.251302 | 0.144752 | 0.134696 | 0.111098  |
| ENSMUSG Eml1      | 31.24704 | 28.76304 | 28.41765 | 18.73579 | 18.76517 | 20.012204 |
| ENSMUSG Olfr818   | 0        | 0        | 0        | 0        | 0        | 0         |
| ENSMUSG Sdhc      | 22.05666 | 22.74419 | 22.02968 | 23.455   | 24.17802 | 24.068848 |
| ENSMUSG Ctsj      | 0        | 0        | 0        | 0        | 0        | 0         |
| ENSMUSG Tmem245   | 12.57429 | 12.43417 | 10.03282 | 8.676945 | 8.430895 | 8.898577  |
| ENSMUSG Tas2r113  | 0        | 0        | 0        | 0        | 0        | 0         |
| ENSMUSG Olfr394   | 0        | 0        | 0        | 0        | 0        | 0         |
| ENSMUSG Wdfy2     | 6.285854 | 5.896955 | 5.51723  | 7.616524 | 9.15771  | 9.359965  |
| ENSMUSG Clec4f    | 0        | 0        | 0        | 0        | 0        | 0         |
| ENSMUSG Klra17    | 0.540263 | 0.410151 | 0.841084 | 0.458648 | 0.342008 | 0.215297  |
| Mus_musc Mus_musc | 0        | 0        | 0        | 0        | 0.186692 | 0         |
| Mus_musc Mus_musc | 0        | 0        | 0        | 0.127433 | 0        | 0.337769  |
| Mus_musc Mus_musc | 0.322532 | 0.099741 | 0.236995 | 0.476603 | 0.618307 | 0.132904  |
| Mus_musc Mus_musc | 0.162148 | 0.154134 | 0.123327 | 0.582533 | 0.167562 | 0.782482  |
| Mus_musc Mus_musc | 0        | 0        | 0        | 0.514498 | 0.109364 | 0.186729  |
| Mus_musc Mus_musc | 0        | 0        | 0        | 0        | 0        | 0         |
| ENSMUSG Oprd1     | 0.042086 | 0.03757  | 0.021931 | 0.067036 | 0.041504 | 0.037424  |
| ENSMUSG Magea2    | 0        | 0        | 0        | 0        | 0        | 0         |
| ENSMUSG Rtl6      | 1.63047  | 1.596191 | 1.467332 | 1.702746 | 1.664371 | 1.699998  |
| ENSMUSG Tssk3     | 0        | 0        | 0        | 0        | 0        | 0.043169  |
| ENSMUSG Gsdmc4    | 0        | 0.044406 | 0.047399 | 0        | 0        | 0         |
| ENSMUSG Pnrc1     | 40.04887 | 39.66109 | 40.67794 | 42.80449 | 38.87217 | 38.301353 |
| ENSMUSG Gpr26     | 0        | 0        | 0        | 0        | 0        | 0         |
| ENSMUSG Gorab     | 3.171642 | 3.61404  | 2.791363 | 3.48259  | 2.790185 | 3.521682  |
| ENSMUSG Sdr9c7    | 0        | 0        | 0.03169  | 0.105031 | 0.079856 | 0.026306  |
| ENSMUSG Rep15     | 0.318703 | 0.278629 | 0.398962 | 0.197679 | 0.056951 | 0.060841  |
| ENSMUSG Zmym5     | 18.61067 | 13.09501 | 13.31092 | 9.870634 | 14.39884 | 9.129992  |
| ENSMUSG Gm4513    | 0        | 0        | 0        | 0        | 0        | 0         |
| ENSMUSG Gm49320   | 1.967482 | 1.860718 | 0.543765 | 0.465962 | 0        | 0.31391   |
| Mus_musc Mus_musc | 0        | 0.201594 | 0.34785  | 0.088375 | 0.067209 | 0.03184   |
| ENSMUSG Bsnd      | 0        | 0        | 0        | 0.018942 | 0        | 0         |
| ENSMUSG Tprn      | 3.381128 | 2.745509 | 3.057642 | 3.244899 | 3.907008 | 3.728929  |
| ENSMUSG Vma21-ps  | 0        | 0        | 0        | 0        | 0        | 0         |
| ENSMUSG Dctn2     | 59.50288 | 59.75514 | 62.03708 | 52.15088 | 54.39206 | 58.082817 |
| ENSMUSG Olfr845   | 0        | 0        | 0        | 0        | 0        | 0         |
| ENSMUSG Hist1h2ab | 0.059629 | 0.228365 | 0.256738 | 0.391444 | 0.13025  | 0.326318  |
| ENSMUSG U2af1     | 38.35821 | 36.65187 | 34.90096 | 33.12005 | 34.96416 | 35.044732 |
| ENSMUSG Pip4k2c   | 32.78212 | 33.03533 | 30.67515 | 29.00475 | 32.27229 | 32.790546 |
| ENSMUSG Pard6g    | 15.18095 | 15.5571  | 15.92354 | 8.868567 | 10.01688 | 8.989789  |
| ENSMUSG Lrguk     | 1.57946  | 2.051792 | 1.060921 | 2.19568  | 1.897927 | 1.749725  |
| ENSMUSG Cebpg     | 20.83337 | 23.08744 | 22.20669 | 18.46796 | 19.9678  | 18.168386 |
| ENSMUSG R3hdm1    | 8.749357 | 8.877896 | 8.532842 | 9.423781 | 9.478375 | 9.42093   |

|                   |          |          |          |          |          |           |
|-------------------|----------|----------|----------|----------|----------|-----------|
| ENSMUSG Olfr912   | 0        | 0        | 0        | 0        | 0        | 0         |
| ENSMUSG Zfp30     | 1.940508 | 2.081141 | 1.89725  | 1.397732 | 1.885577 | 1.739261  |
| ENSMUSG Olfr1295  | 0        | 0        | 0        | 0        | 0        | 0         |
| ENSMUSG Olfr1436  | 0        | 0        | 0        | 0        | 0        | 0         |
| ENSMUSG Olfr262   | 0        | 0        | 0        | 0        | 0        | 0         |
| ENSMUSG lck       | 11.70952 | 12.3128  | 10.91461 | 9.102044 | 9.226299 | 9.00515   |
| ENSMUSG Olfr193   | 0        | 0        | 0        | 0        | 0        | 0         |
| ENSMUSG Gm4201    | 0        | 0        | 0        | 0        | 0        | 0         |
| ENSMUSG Gm3532    | 0        | 0        | 0        | 0        | 0.038961 | 0         |
| ENSMUSG Gm26602   | 0.028499 | 0        | 0.022443 | 0.022172 | 0.025045 | 0.053024  |
| ENSMUSG Prx       | 91.15814 | 85.17601 | 94.63611 | 40.00892 | 42.46559 | 39.492018 |
| ENSMUSG Arhgap20  | 0.677344 | 1.065792 | 0.869876 | 0.619931 | 0.891748 | 0.734932  |
| ENSMUSG Podnl1    | 0.832575 | 0.570132 | 1.126537 | 2.305756 | 1.862993 | 2.269545  |
| ENSMUSG Mllt11    | 4.696558 | 3.318295 | 3.926125 | 3.122605 | 3.621412 | 3.610931  |
| ENSMUSG Cib4      | 0.331561 | 0.317247 | 0        | 0.061551 | 0        | 0.115925  |
| ENSMUSG Fbxl18    | 2.118372 | 2.384385 | 2.577696 | 2.228032 | 2.463956 | 2.314665  |
| ENSMUSG Wdr35     | 4.276097 | 4.721285 | 3.568871 | 3.963109 | 3.780323 | 4.163408  |
| ENSMUSG Lgals1    | 55.10018 | 46.65937 | 66.74714 | 128.0049 | 127.2633 | 170.5845  |
| ENSMUSG Il2rb     | 5.064969 | 3.400672 | 16.01662 | 7.708325 | 5.147931 | 6.40919   |
| ENSMUSG Arhgap22  | 6.87166  | 5.910883 | 6.382573 | 6.767826 | 4.860277 | 6.347961  |
| ENSMUSG Gm1330    | 0        | 0        | 0        | 0        | 0        | 0         |
| ENSMUSG Hist1h2bc | 29.03752 | 32.82971 | 31.14068 | 25.0041  | 24.38963 | 28.755058 |
| ENSMUSG Cysltr1   | 0.839486 | 1.00241  | 0.931471 | 1.69214  | 1.608675 | 1.319043  |
| ENSMUSG Actl9     | 0        | 0        | 0.036913 | 0.047275 | 0        | 0         |
| ENSMUSG Fam71e2   | 0        | 0.010179 | 0        | 0        | 0        | 0.020137  |
| ENSMUSG Asf1a     | 6.042428 | 6.040515 | 5.950024 | 4.536272 | 4.547509 | 4.805533  |
| ENSMUSG Fam184a   | 4.349938 | 4.438335 | 4.565617 | 2.715474 | 2.453794 | 2.310379  |
| ENSMUSG Gm20547   | 0        | 0        | 0.032696 | 0        | 0        | 0         |
| ENSMUSG Repts1    | 14.40176 | 14.28647 | 13.67131 | 12.00987 | 11.62219 | 12.638032 |
| ENSMUSG Hebp2     | 0.674604 | 0.709161 | 0.294302 | 2.853748 | 2.515011 | 2.741208  |
| ENSMUSG Arfgef3   | 1.556454 | 1.763411 | 1.208347 | 1.777426 | 1.679002 | 2.285614  |
| ENSMUSG Perp      | 9.756443 | 10.97212 | 9.318058 | 8.600428 | 6.485838 | 9.257152  |
| ENSMUSG Tnfaip3   | 8.935125 | 6.275806 | 9.065199 | 10.39435 | 11.98326 | 12.100343 |
| ENSMUSG Frs1      | 1.330963 | 1.251418 | 1.077988 | 3.07843  | 2.5571   | 3.469108  |
| ENSMUSG Rtp1      | 0        | 0        | 0        | 0        | 0        | 0.049825  |
| ENSMUSG Trappc8   | 17.05924 | 18.2011  | 16.32754 | 15.8082  | 15.64054 | 15.895545 |
| ENSMUSG Arhgap44  | 18.44704 | 17.70741 | 15.15125 | 15.35185 | 15.73976 | 17.238849 |
| ENSMUSG Gpr65     | 1.828604 | 2.014896 | 4.226589 | 5.681556 | 7.965329 | 6.006305  |
| ENSMUSG Hacl1     | 3.107319 | 3.325191 | 2.534326 | 2.86819  | 3.004024 | 2.907595  |
| ENSMUSG Rnase6    | 3.61189  | 2.353323 | 4.107284 | 6.276912 | 4.891248 | 4.354166  |
| ENSMUSG Mchr1     | 0.629377 | 0.375798 | 0.170017 | 0.210187 | 0.169038 | 0.235513  |
| ENSMUSG Egr2      | 2.976964 | 1.177152 | 1.773915 | 6.809666 | 6.802809 | 8.543166  |
| ENSMUSG Gm17364   | 0        | 0        | 0        | 0        | 0        | 0         |
| ENSMUSG Gm4340    | 0        | 0        | 0        | 0        | 0        | 0         |
| ENSMUSG Aim2      | 1.481507 | 1.828871 | 2.813325 | 4.362822 | 3.469516 | 3.603816  |
| ENSMUSG Gm29644   | 0        | 0        | 0        | 0        | 0        | 0         |
| ENSMUSG Gm20869   | 0        | 0        | 0        | 0        | 0        | 0         |
| ENSMUSG Cep135    | 2.786012 | 3.18763  | 2.65858  | 2.651745 | 2.718138 | 2.757783  |
| ENSMUSG Gng12     | 32.4116  | 31.13561 | 26.56295 | 32.63877 | 33.12277 | 31.322735 |
| ENSMUSG Glt6d1    | 0        | 0        | 0        | 0        | 0        | 0         |
| ENSMUSG 2310061I0 | 7.830551 | 10.90707 | 9.366629 | 9.288977 | 8.911532 | 10.122354 |
| ENSMUSG Defb46    | 0        | 0        | 0        | 0        | 0        | 0         |
| ENSMUSG Gm6040    | 0        | 0        | 0        | 0        | 0        | 0         |
| ENSMUSG Gm28360   | 0        | 0        | 0        | 0        | 0        | 0         |
| ENSMUSG Usp17lb   | 0        | 0        | 0        | 0        | 0        | 0         |
| ENSMUSG Pld2      | 11.54068 | 10.59323 | 11.30111 | 9.242237 | 9.945424 | 10.250068 |
| ENSMUSG Slc46a1   | 1.86615  | 1.70965  | 1.812861 | 2.13922  | 1.539598 | 2.197757  |
| ENSMUSG Nos2      | 1.294355 | 1.358925 | 0.878537 | 3.120409 | 2.478033 | 3.878593  |
| ENSMUSG Pdcd10    | 24.05153 | 24.26003 | 23.9513  | 22.19144 | 22.84947 | 21.909025 |
| ENSMUSG Vep1      | 2.344355 | 2.930844 | 2.486338 | 6.823619 | 6.654126 | 7.304012  |
| ENSMUSG Ptx3      | 0.046364 | 0.185529 | 0.188251 | 0.584394 | 0.491322 | 0.29462   |
| ENSMUSG Shox2     | 0        | 0.159623 | 0.061112 | 0.176411 | 0.042808 | 0.053599  |
| ENSMUSG Gimd1     | 0        | 0        | 0        | 0        | 0        | 0         |
| ENSMUSG Siah3     | 0.037209 | 0        | 0.022405 | 0        | 0        | 0.03645   |

|                   |          |          |          |          |          |           |
|-------------------|----------|----------|----------|----------|----------|-----------|
| ENSMUSG Gm20792   | 0        | 0        | 0        | 0        | 0        | 0         |
| Mus_musc Mus_musc | 0        | 0.230262 | 0        | 0.205175 | 0        | 0         |
| ENSMUSG Wnt10a    | 0.022171 | 0.037514 | 0.07509  | 0.141652 | 0.120268 | 0.256652  |
| ENSMUSG Pri7c1    | 0        | 0        | 0        | 0        | 0        | 0         |
| ENSMUSG Ccl20     | 2.181548 | 0.532309 | 0.748948 | 8.347413 | 6.521878 | 6.076     |
| ENSMUSG Ipmk      | 13.80218 | 13.55427 | 12.3006  | 11.01204 | 11.97841 | 11.132763 |
| ENSMUSG Rxfp3     | 0        | 0        | 0        | 0        | 0        | 0         |
| ENSMUSG Gm26566   | 0.09872  | 0.111178 | 0.111823 | 0.2262   | 0.16866  | 0.167138  |
| ENSMUSG AC084822  | 0        | 0        | 0        | 0        | 0        | 0         |
| ENSMUSG Tmcc1     | 12.94906 | 8.080923 | 8.27087  | 6.913002 | 8.05057  | 7.014945  |
| ENSMUSG Cops7a    | 46.32354 | 41.71136 | 45.75242 | 38.78016 | 39.69145 | 44.742867 |
| ENSMUSG Lag3      | 0.337442 | 0.365222 | 0.729862 | 3.584072 | 3.060831 | 2.823821  |
| ENSMUSG Lrrc23    | 12.27162 | 13.44241 | 7.332845 | 20.5506  | 15.02782 | 18.602535 |
| ENSMUSG Ptms      | 231.5574 | 256.1281 | 255.6362 | 204.167  | 210.3489 | 206.6805  |
| ENSMUSG Plxnd1    | 24.51632 | 21.01409 | 20.19426 | 27.1995  | 27.69604 | 32.654602 |
| ENSMUSG Cdiptos   | 1.100397 | 1.293314 | 0.779575 | 1.959394 | 0.932877 | 1.08707   |
| ENSMUSG Prokr1    | 0.129241 | 0.140635 | 0.158992 | 0.316659 | 0.329735 | 0.483204  |
| ENSMUSG Taf1c     | 3.356103 | 2.97477  | 3.501232 | 3.529512 | 2.431624 | 3.367526  |
| ENSMUSG Dnaaf1    | 1.624442 | 1.96734  | 1.219726 | 2.825788 | 2.557805 | 2.885931  |
| ENSMUSG Olfr566   | 0        | 0        | 0        | 0        | 0        | 0         |
| ENSMUSG Pbx3      | 9.250033 | 10.19819 | 9.473563 | 8.664091 | 8.238966 | 8.031552  |
| ENSMUSG Mbtpts1   | 39.85949 | 39.96687 | 37.78544 | 33.35792 | 35.09513 | 35.507935 |
| ENSMUSG Pik3r2    | 17.70807 | 17.12218 | 16.3266  | 16.84864 | 18.49016 | 17.708843 |
| ENSMUSG Ogfr      | 18.44073 | 18.20776 | 23.62141 | 19.77089 | 17.83427 | 20.554258 |
| ENSMUSG Hsbp1     | 65.6807  | 64.89478 | 68.23055 | 64.03799 | 59.02407 | 61.674724 |
| ENSMUSG Rarres1   | 2.15037  | 1.086687 | 1.465282 | 1.597665 | 2.634617 | 2.196195  |
| ENSMUSG Kcnd2     | 0.042081 | 0.074908 | 0.025904 | 0.098121 | 0.04613  | 0.024847  |
| ENSMUSG Mindy1    | 24.76518 | 22.09963 | 24.11309 | 22.47512 | 21.94299 | 22.155688 |
| Mus_musc Mus_musc | 0.46738  | 0.365554 | 0.564759 | 0.187694 | 0.382436 | 0.344555  |
| ENSMUSG Zfp35     | 6.000058 | 6.858235 | 5.706486 | 5.776248 | 5.573442 | 5.493355  |
| ENSMUSG Zfand5    | 30.6915  | 28.70141 | 27.57119 | 25.33175 | 25.33465 | 23.16058  |
| ENSMUSG Traf1     | 14.97237 | 15.89152 | 13.48557 | 15.67048 | 15.82654 | 14.496658 |
| ENSMUSG Hc        | 58.91864 | 63.01371 | 56.66724 | 159.9222 | 164.0909 | 177.32291 |
| ENSMUSG Phf19     | 0.690017 | 0.889805 | 1.146272 | 1.074018 | 1.15762  | 1.2932    |
| ENSMUSG Zeb2      | 19.14251 | 22.11819 | 22.77279 | 30.67211 | 30.13235 | 31.577496 |
| ENSMUSG Cutal     | 3.927281 | 4.077974 | 3.942267 | 4.957746 | 3.786052 | 5.175077  |
| ENSMUSG Ctxn2     | 0        | 0        | 0.071979 | 0        | 0        | 0         |
| ENSMUSG Gsn       | 638.1007 | 649.6084 | 712.8512 | 536.9502 | 578.2195 | 526.43858 |
| ENSMUSG Rab14     | 61.53119 | 59.27067 | 56.97972 | 50.66992 | 53.77851 | 49.395995 |
| ENSMUSG Al606181  | 1.310168 | 1.987091 | 2.25079  | 1.529799 | 1.179781 | 1.085487  |
| ENSMUSG Tmem212   | 13.74048 | 13.82674 | 12.39935 | 17.87117 | 16.55721 | 12.914388 |
| ENSMUSG Pitx1     | 0.065285 | 0.037775 | 0        | 0.096699 | 0.125985 | 0.069286  |
| ENSMUSG Pyurf     | 3.336045 | 3.389924 | 3.212813 | 4.223581 | 3.814731 | 3.381954  |
| ENSMUSG H2-Q7     | 39.58104 | 30.4996  | 125.4001 | 81.70013 | 44.04509 | 64.47175  |
| ENSMUSG Prpf18    | 24.05983 | 24.15016 | 21.1358  | 18.51307 | 19.46008 | 19.537819 |
| ENSMUSG Rasgef1b  | 13.74855 | 14.32837 | 11.44669 | 6.481405 | 8.465803 | 7.770664  |
| ENSMUSG Fezf1     | 0        | 0        | 0        | 0        | 0        | 0         |
| ENSMUSG Aass      | 2.899738 | 3.062829 | 2.333496 | 5.105171 | 5.041702 | 4.623369  |
| ENSMUSG Ssc4d     | 0.950325 | 0.950994 | 0.468149 | 0.368508 | 0.760252 | 0.841132  |
| ENSMUSG Dhx9      | 38.02214 | 39.17989 | 39.5519  | 35.58346 | 36.05035 | 33.823603 |
| ENSMUSG Stn1      | 7.22247  | 7.074685 | 6.59647  | 6.194901 | 6.427398 | 6.986731  |
| ENSMUSG Cps1      | 0        | 0        | 0        | 0.008521 | 0        | 0         |
| ENSMUSG Slc40a1   | 4.649064 | 3.217234 | 3.903127 | 3.250746 | 2.989432 | 2.968569  |
| ENSMUSG Wdr75     | 7.063532 | 7.581132 | 6.85825  | 7.339197 | 6.244047 | 7.466778  |
| ENSMUSG Ikzf2     | 0.764815 | 1.065251 | 0.964169 | 1.20125  | 1.144459 | 1.269791  |
| ENSMUSG Ttyh2     | 4.054705 | 3.850848 | 4.386937 | 5.029122 | 4.659302 | 5.604463  |
| ENSMUSG Sptb      | 0.669451 | 0.678427 | 0.664913 | 0.411479 | 0.445725 | 0.263176  |
| ENSMUSG Rab15     | 7.895757 | 8.06554  | 5.44316  | 11.79794 | 14.50038 | 14.274715 |
| ENSMUSG Fut8      | 14.70597 | 13.45353 | 12.99137 | 21.24325 | 22.22335 | 19.381829 |
| ENSMUSG B3gntl1   | 1.925375 | 2.765361 | 2.251245 | 2.698947 | 1.963439 | 2.747312  |
| ENSMUSG Atl1      | 0.962225 | 0.950687 | 0.680676 | 0.53724  | 0.752503 | 0.843023  |
| ENSMUSG Pygl      | 29.47698 | 31.60646 | 27.37411 | 30.89242 | 30.50447 | 36.638027 |
| ENSMUSG Nin       | 12.02774 | 13.52145 | 11.62958 | 14.11403 | 14.77434 | 15.918511 |
| ENSMUSG Sirt4     | 4.931161 | 5.420579 | 4.248945 | 4.358795 | 3.529568 | 4.715702  |

|                   |          |          |          |          |          |           |
|-------------------|----------|----------|----------|----------|----------|-----------|
| ENSMUSG Resf1     | 20.04508 | 25.59714 | 17.66868 | 16.65113 | 15.87147 | 16.720031 |
| ENSMUSG 1700123K  | 0.042024 | 0.014149 | 0.022267 | 0.06     | 0        | 0         |
| ENSMUSG Mdfi      | 2.810448 | 2.878459 | 2.667517 | 2.968916 | 2.931195 | 3.10618   |
| ENSMUSG Chek2     | 1.077118 | 1.694155 | 1.412023 | 2.565856 | 2.421446 | 2.81836   |
| ENSMUSG Trib3     | 2.534526 | 2.406569 | 2.116872 | 1.652725 | 2.26353  | 2.962162  |
| ENSMUSG Syde1     | 23.08069 | 21.49662 | 24.92617 | 14.81289 | 14.94101 | 12.48394  |
| ENSMUSG Sbspon    | 0.181736 | 0.585679 | 0.437156 | 0.662883 | 0.539084 | 0.533658  |
| ENSMUSG Mansc1    | 5.66872  | 4.605833 | 5.01259  | 5.780252 | 4.944323 | 5.138843  |
| ENSMUSG Pxn       | 60.40923 | 56.88757 | 59.61704 | 43.62606 | 42.81177 | 44.250309 |
| Mus_musc Mus_musc | 3.001238 | 1.810853 | 2.036671 | 1.643975 | 1.731477 | 2.847354  |
| ENSMUSG Vwc2l     | 0        | 0        | 0        | 0        | 0        | 0         |
| ENSMUSG Prss21    | 0        | 0.038507 | 0        | 0        | 0        | 0         |
| ENSMUSG Phldb3    | 1.673583 | 2.115151 | 2.373935 | 2.011264 | 2.619081 | 2.664069  |
| ENSMUSG Prss41    | 0.409509 | 0.096963 | 0.432905 | 0.39363  | 0.36529  | 0.237425  |
| ENSMUSG Ceacam1   | 22.35634 | 23.73276 | 22.84152 | 22.78632 | 23.69553 | 26.253009 |
| ENSMUSG Tedc2     | 3.440297 | 3.010426 | 3.263057 | 2.333873 | 3.232523 | 2.850583  |
| ENSMUSG Traf4     | 9.657785 | 7.895318 | 7.566234 | 10.03876 | 10.27805 | 10.941355 |
| ENSMUSG Serpinb3a | 0        | 0        | 0        | 0        | 0        | 0         |
| ENSMUSG Dnd1      | 0.819981 | 0.758887 | 0.858753 | 0.852461 | 0.319781 | 0.804859  |
| ENSMUSG Mycs      | 0        | 0        | 0        | 0        | 0        | 0         |
| ENSMUSG Tex13c3   | 0        | 0        | 0        | 0        | 0        | 0         |
| Mus_musc Mus_musc | 0        | 0        | 0        | 0.179325 | 0.097364 | 0.313382  |
| ENSMUSG Ubash3a   | 0.813802 | 0.369065 | 0.674683 | 1.250123 | 0.754694 | 1.44716   |
| ENSMUSG Ctf1      | 1.964445 | 2.249246 | 2.288778 | 1.617198 | 1.82595  | 1.580836  |
| ENSMUSG Ikbke     | 2.969986 | 2.691038 | 3.105525 | 3.882089 | 3.943258 | 5.139922  |
| ENSMUSG Arl15     | 21.67096 | 20.54884 | 17.22908 | 14.80743 | 14.22107 | 13.662365 |
| ENSMUSG Trappc2   | 10.74947 | 10.1162  | 10.84565 | 9.619512 | 8.170094 | 7.72705   |
| ENSMUSG Taar7b    | 0        | 0        | 0        | 0        | 0        | 0         |
| ENSMUSG Gm5039    | 0        | 0        | 0        | 0        | 0        | 0         |
| ENSMUSG B3galt5   | 0.014311 | 0.046246 | 0.014328 | 0.075082 | 0.238261 | 0.20326   |
| ENSMUSG Lcmt2     | 3.007476 | 3.477993 | 3.072401 | 3.230926 | 2.905341 | 2.824881  |
| ENSMUSG Ifit3     | 37.12289 | 35.08725 | 44.61077 | 25.43154 | 24.83428 | 23.11492  |
| ENSMUSG Eif4e1b   | 0        | 0        | 0        | 0        | 0.043979 | 0         |
| ENSMUSG Paxbp1    | 7.973245 | 8.931843 | 9.305204 | 9.485173 | 8.800358 | 9.747334  |
| ENSMUSG Fam133b   | 9.523429 | 9.72981  | 9.44919  | 8.191467 | 8.240112 | 7.539252  |
| ENSMUSG Ddx39     | 12.66234 | 12.31228 | 14.87614 | 11.94373 | 12.23373 | 13.585368 |
| ENSMUSG Pcgf5     | 9.647181 | 7.679528 | 8.165614 | 7.379808 | 6.156438 | 6.612355  |
| ENSMUSG Mlana     | 1.640673 | 2.260891 | 3.470241 | 1.370342 | 1.314038 | 0.931279  |
| ENSMUSG Syvn1     | 15.19035 | 14.48712 | 17.24885 | 26.45094 | 24.45073 | 24.570024 |
| ENSMUSG Rpp30     | 6.463072 | 7.586805 | 6.718247 | 6.256973 | 5.461034 | 6.050372  |
| ENSMUSG Ankrd1    | 12.3077  | 23.50017 | 14.79369 | 10.02205 | 6.849018 | 7.432359  |
| ENSMUSG Mis18a    | 9.06691  | 9.355158 | 11.31879 | 9.857108 | 9.608704 | 10.293288 |
| ENSMUSG Prss34    | 0        | 0        | 0.105793 | 0        | 0        | 0.045292  |
| ENSMUSG Sez6      | 0        | 0.020349 | 0        | 0        | 0.032811 | 0.013035  |
| ENSMUSG Gm10065   | 0        | 0        | 0        | 0        | 0.001276 | 0         |
| ENSMUSG Ptk2b     | 12.17311 | 10.45378 | 13.51306 | 17.15956 | 17.00871 | 17.441926 |
| ENSMUSG Plac8l1   | 0        | 0        | 0.096978 | 0        | 0        | 0         |
| Mus_musc Mus_musc | 0.25464  | 0.213416 | 0        | 0.064855 | 0.274034 | 0         |
| ENSMUSG Gm11985   | 0        | 0.103894 | 0        | 0        | 0        | 0         |
| ENSMUSG Trp53bp1  | 4.991049 | 4.808651 | 4.5647   | 4.560656 | 4.631614 | 4.985655  |
| ENSMUSG Hist1h1e  | 0.419383 | 0.934752 | 0.550155 | 0.921302 | 1.327026 | 0.762623  |
| ENSMUSG Ranbp1    | 33.58623 | 34.29804 | 36.00683 | 38.88796 | 36.64349 | 37.332005 |
| ENSMUSG 9130019O  | 2.378737 | 2.216744 | 2.551121 | 1.858197 | 1.82123  | 2.024104  |
| ENSMUSG Prr14     | 26.03586 | 23.02618 | 24.54723 | 19.46455 | 20.05828 | 18.127417 |
| ENSMUSG Fgf21     | 0        | 0        | 0        | 0.147667 | 0.117787 | 0         |
| ENSMUSG Bcat2     | 14.45007 | 13.3867  | 13.31067 | 18.01314 | 19.40618 | 20.205516 |
| ENSMUSG Hsd17b14  | 0.139715 | 0.049599 | 0.338355 | 0.353004 | 0.370984 | 0.240232  |
| ENSMUSG Nucb1     | 43.26617 | 40.64985 | 45.56325 | 49.47732 | 51.9258  | 52.705346 |
| ENSMUSG Usp45     | 4.741114 | 4.82706  | 4.712076 | 4.31101  | 4.569424 | 4.414405  |
| ENSMUSG Hypm      | 0        | 0        | 0        | 0        | 0        | 0         |
| ENSMUSG Sgms1     | 41.92058 | 42.42551 | 35.70807 | 25.28306 | 28.98274 | 25.63671  |
| ENSMUSG Cdh12     | 0.007078 | 0        | 0        | 0        | 0        | 0         |
| ENSMUSG Atp6v1f   | 67.57292 | 71.76394 | 77.95222 | 83.47664 | 80.5155  | 91.043144 |
| ENSMUSG Arglu1    | 16.29851 | 14.74534 | 17.62828 | 14.27968 | 12.56324 | 12.590271 |

|                   |          |          |          |          |          |           |
|-------------------|----------|----------|----------|----------|----------|-----------|
| ENSMUSG Gpr1      | 0        | 0        | 0        | 0        | 0        | 0.044622  |
| ENSMUSG Pip5kl1   | 0        | 0        | 0        | 0        | 0        | 0         |
| Mus_musc Mus_musc | 0        | 0        | 0        | 0        | 0        | 0         |
| Mus_musc Mus_musc | 0        | 0        | 0        | 0        | 0        | 0         |
| Mus_musc Mus_musc | 0.076445 | 0        | 0.217125 | 0.095361 | 0        | 0         |
| Mus_musc Mus_musc | 0.673674 | 0.539148 | 0.543188 | 0.407369 | 0.760338 | 0.146754  |
| Mus_musc Mus_musc | 0        | 0.154309 | 0        | 0        | 0        | 0         |
| Mus_musc Mus_musc | 0.046787 | 0.181083 | 0.178479 | 0.098617 | 0.254113 | 0.067878  |
| ENSMUSG Pfkfb2    | 16.67947 | 18.4864  | 13.7924  | 20.80182 | 19.45354 | 19.932074 |
| Mus_musc Mus_musc | 2.079122 | 1.723499 | 1.886328 | 1.548909 | 1.079604 | 2.060428  |
| ENSMUSG Cacna1s   | 0.10063  | 0.174558 | 0.125093 | 1.01532  | 1.028755 | 1.011032  |
| ENSMUSG Ddx59     | 3.226137 | 2.9717   | 2.860176 | 3.117026 | 2.705014 | 2.942983  |
| ENSMUSG C4bp      | 0        | 0.030659 | 0.016644 | 0.147728 | 0.11361  | 0.278686  |
| ENSMUSG Olfr1459  | 0        | 0        | 0        | 0        | 0        | 0         |
| ENSMUSG Cd55b     | 0.737562 | 0.600079 | 0.413309 | 1.283823 | 1.392221 | 1.492312  |
| ENSMUSG Nbn       | 10.10605 | 9.218174 | 9.299982 | 7.707492 | 8.156231 | 8.436979  |
| ENSMUSG Gm13271   | 0        | 0        | 0        | 0        | 0.051009 | 0.148959  |
| ENSMUSG Olfr491   | 0        | 0        | 0        | 0        | 0        | 0         |
| ENSMUSG A630076J1 | 0        | 0        | 0        | 0        | 0        | 0         |
| ENSMUSG Gm20888   | 0        | 0        | 0        | 0        | 0        | 0         |
| ENSMUSG Dnajb7    | 0        | 0.161834 | 0.030246 | 0.163758 | 0        | 0.074001  |
| ENSMUSG Cldn14    | 0        | 0        | 0        | 0        | 0        | 0         |
| ENSMUSG Kif20a    | 0.391168 | 0.620615 | 0.700736 | 1.764555 | 2.318676 | 3.290498  |
| ENSMUSG Brd8      | 13.64584 | 13.07818 | 12.57396 | 10.55553 | 12.58443 | 11.205711 |
| ENSMUSG Tas2r139  | 0        | 0        | 0        | 0        | 0        | 0         |
| ENSMUSG Pbp2      | 0        | 0        | 0        | 0        | 0        | 0.021601  |
| ENSMUSG Cacna1d   | 3.331274 | 3.468274 | 3.307964 | 4.668732 | 3.911831 | 4.269866  |
| ENSMUSG Il17rb    | 0.331584 | 0.287156 | 0.691955 | 0.30597  | 0.410455 | 0.357141  |
| ENSMUSG Rad51c    | 0.609858 | 0.527954 | 0.589064 | 0.482732 | 0.578964 | 0.594262  |
| ENSMUSG 1700016C  | 0.113113 | 0.126984 | 0        | 0.205511 | 0.369495 | 0.127827  |
| ENSMUSG Adss      | 23.56146 | 23.68325 | 22.42512 | 24.21633 | 23.3357  | 26.413433 |
| Mus_musc Mus_musc | 0.285617 | 0        | 0        | 0        | 0        | 0         |
| ENSMUSG Adgb      | 1.309585 | 1.286512 | 0.814879 | 1.460717 | 1.506465 | 1.351675  |
| Mus_musc Mus_musc | 0        | 0        | 0        | 0        | 0        | 0         |
| ENSMUSG Cetn1     | 0        | 0        | 0        | 0        | 0        | 0         |
| Mus_musc Mus_musc | 0        | 0        | 0        | 0.140076 | 0        | 0         |
| Mus_musc Mus_musc | 0        | 0        | 0        | 0        | 0        | 0         |
| Mus_musc Mus_musc | 0        | 0        | 0        | 0        | 0        | 0.159193  |
| Mus_musc Mus_musc | 0        | 0        | 0        | 0.25844  | 0        | 0.116712  |
| Mus_musc Mus_musc | 0.075341 | 0.172858 | 0        | 0.075089 | 0.261215 | 0.050702  |
| ENSMUSG Mrgprx1   | 0        | 0        | 0        | 0        | 0        | 0         |
| ENSMUSG Mrgprb5   | 0        | 0        | 0        | 0        | 0        | 0         |
| ENSMUSG Pex16     | 10.55117 | 9.764052 | 9.246888 | 10.02981 | 8.41725  | 7.802444  |
| Mus_musc Mus_musc | 0.251148 | 0.212363 | 0.160201 | 0.22221  | 0.211399 | 0.276199  |
| ENSMUSG Taf7l     | 0        | 0        | 0        | 0        | 0        | 0         |
| Mus_musc Mus_musc | 2.512962 | 1.811451 | 1.844664 | 1.064889 | 1.357169 | 1.858729  |
| Mus_musc Mus_musc | 0.361527 | 0.545918 | 0.610214 | 0.673159 | 0.795514 | 0.540201  |
| Mus_musc Mus_musc | 0        | 0        | 0.447792 | 0.134169 | 0        | 0.115317  |
| Mus_musc Mus_musc | 0        | 0.126771 | 0.272327 | 0.261872 | 0.114561 | 0         |
| Mus_musc Mus_musc | 0        | 0        | 0        | 0        | 0        | 0         |
| Mus_musc Mus_musc | 0        | 0.131914 | 0        | 0.329366 | 0        | 0.263852  |
| ENSMUSG Olfm1     | 8.101628 | 8.361124 | 11.29172 | 13.98972 | 14.60838 | 17.565603 |
| ENSMUSG Slurp2    | 0.712449 | 0.710389 | 0.092992 | 0.621988 | 0.218207 | 0.101387  |
| ENSMUSG Ermn      | 0        | 0        | 0.041827 | 0.014553 | 0        | 0         |
| Mus_musc Mus_musc | 0        | 0        | 0        | 0.237606 | 0.034155 | 0.19061   |
| ENSMUSG Zc3h3     | 6.585658 | 5.393986 | 5.899047 | 5.150143 | 4.280291 | 3.950746  |
| Mus_musc Mus_musc | 0.665031 | 0.826652 | 0.674895 | 0.522844 | 0.481286 | 0.922447  |
| Mus_musc Mus_musc | 1.242665 | 1.046192 | 1.241005 | 1.56771  | 1.048792 | 0.911645  |
| ENSMUSG Chil1     | 258.3299 | 257.8858 | 228.985  | 741.7953 | 916.9854 | 913.46834 |
| ENSMUSG Plcx1     | 0.994113 | 1.043967 | 0.414433 | 0.692919 | 0.797812 | 1.606183  |
| ENSMUSG Ly6a      | 371.0593 | 337.7658 | 750.4702 | 435.9673 | 324.5877 | 331.07189 |
| ENSMUSG Mertk     | 14.30545 | 13.29256 | 14.83277 | 12.24694 | 13.32828 | 12.268209 |
| Mus_musc Mus_musc | 0        | 0        | 0        | 0.548455 | 0        | 0.076581  |
| Mus_musc Mus_musc | 0        | 0        | 0        | 0.05329  | 0        | 0         |

|                    |          |          |          |          |          |           |
|--------------------|----------|----------|----------|----------|----------|-----------|
| Mus_musc Mus_musc  | 0        | 0        | 0        | 0        | 0        | 0.245218  |
| Mus_musc Mus_musc  | 0        | 0        | 0        | 0        | 0        | 0         |
| Mus_musc Mus_musc  | 0.065549 | 0.140169 | 0.116775 | 0.099141 | 0.390492 | 0.177582  |
| ENSMUSG Cd8a       | 1.995945 | 1.311823 | 1.311206 | 2.72183  | 2.605813 | 2.934722  |
| Mus_musc Mus_musc  | 0        | 0        | 0        | 0        | 0        | 0         |
| Mus_musc Mus_musc  | 2.871683 | 2.403026 | 2.782924 | 1.855732 | 1.884244 | 1.526988  |
| Mus_musc Mus_musc  | 0        | 0.321209 | 0        | 0.195149 | 0        | 0.136305  |
| ENSMUSG Scgb1b3    | 0        | 0        | 0        | 0        | 0        | 0         |
| Mus_musc Mus_musc  | 0.116868 | 0.181072 | 0.14029  | 0.132728 | 0.127832 | 0.105928  |
| ENSMUSG Gm10697    | 0        | 0        | 0        | 0        | 0        | 0         |
| Mus_musc Mus_musc  | 0        | 0        | 0        | 0        | 0.186692 | 0         |
| ENSMUSG Zfp799     | 1.860914 | 1.699992 | 1.465088 | 1.387943 | 1.768357 | 1.271907  |
| ENSMUSG Btnl6      | 0        | 0        | 0        | 0.022857 | 0        | 0         |
| ENSMUSG Gm7903     | 0        | 0        | 0        | 0        | 0        | 0         |
| ENSMUSG Gm45521    | 0        | 0        | 0        | 0        | 0        | 0         |
| ENSMUSG Arrdc2     | 5.423813 | 6.196091 | 6.445004 | 3.662172 | 4.279655 | 3.99735   |
| ENSMUSG Ai597479   | 10.60192 | 10.64145 | 9.978616 | 8.427706 | 8.109509 | 8.062596  |
| Mus_musc Mus_musc  | 0        | 0        | 0        | 0        | 0        | 0         |
| ENSMUSG Cyb561d1   | 5.845098 | 4.478581 | 5.662982 | 5.472291 | 5.288471 | 4.777049  |
| ENSMUSG Gyg        | 33.545   | 30.14565 | 42.5326  | 59.98686 | 59.5012  | 62.298072 |
| ENSMUSG Thg1l      | 1.964965 | 1.963201 | 1.980926 | 2.601933 | 2.568057 | 2.912147  |
| ENSMUSG Gm28168    | 0        | 0        | 0        | 0        | 0        | 0         |
| ENSMUSG Rpl37a     | 190.0982 | 191.1988 | 193.8274 | 207.8981 | 192.318  | 220.13833 |
| ENSMUSG AY761185   | 0        | 0        | 0        | 0        | 0.246284 | 0.328082  |
| ENSMUSG Zc3h18     | 16.56984 | 17.0274  | 17.21475 | 15.15833 | 15.60437 | 15.749659 |
| Mus_musc Mus_musc  | 7.369795 | 6.894156 | 5.454128 | 5.034474 | 5.491279 | 5.201349  |
| Mus_musc Mus_musc  | 0.582734 | 0.593353 | 0        | 0.483008 | 0.478257 | 0.183866  |
| Mus_musc Mus_musc  | 0        | 0.649254 | 1.215881 | 0.706127 | 0.493401 | 0.34394   |
| Mus_musc Mus_musc  | 1.933776 | 1.49999  | 1.626982 | 1.129269 | 1.021672 | 1.026769  |
| Mus_musc Mus_musc  | 0        | 0        | 0        | 0.046982 | 0.209501 | 0.249749  |
| Mus_musc Mus_musc  | 0        | 0.175787 | 0        | 0        | 0        | 0         |
| ENSMUSG Casd1      | 13.07689 | 12.88264 | 12.36551 | 12.48612 | 12.19392 | 11.333576 |
| ENSMUSG Otor       | 0        | 0        | 0        | 0        | 0        | 0         |
| ENSMUSG Cep120     | 13.09251 | 13.97399 | 13.20116 | 10.91652 | 11.1305  | 10.230851 |
| Mus_musc Mus_musc  | 0.030384 | 0.188098 | 0.036794 | 0        | 0        | 0.126817  |
| ENSMUSG Slc47a1    | 0.691302 | 0.773914 | 0.347768 | 0.306031 | 0.166379 | 0.091507  |
| ENSMUSG Olfr1090   | 0        | 0        | 0        | 0        | 0        | 0         |
| ENSMUSG Rpusd1     | 4.578652 | 5.161705 | 5.581506 | 3.832242 | 4.849343 | 4.738082  |
| ENSMUSG Pla2g5     | 0.067847 | 0.202577 | 0.05336  | 0.703098 | 0.607069 | 0.795741  |
| ENSMUSG Vps16      | 13.25788 | 11.77278 | 12.37936 | 10.52803 | 11.20901 | 11.796457 |
| ENSMUSG Cxcr3      | 1.714986 | 1.416775 | 2.205149 | 3.467154 | 2.274174 | 4.204575  |
| ENSMUSG Gja4       | 46.2419  | 38.47054 | 38.79867 | 31.27416 | 25.69806 | 27.474905 |
| ENSMUSG Krtap24-1  | 0        | 0        | 0        | 0        | 0.017425 | 0         |
| ENSMUSG Gm36368    | 0        | 0        | 0        | 0        | 0        | 0         |
| ENSMUSG Gm5485     | 0        | 0.052829 | 0        | 0.131343 | 0        | 0         |
| ENSMUSG Olfr1079   | 0        | 0        | 0        | 0        | 0        | 0         |
| ENSMUSG Mmrn2      | 10.98614 | 7.802053 | 11.66576 | 9.163479 | 8.462368 | 8.711559  |
| ENSMUSG Arhgap32   | 3.731437 | 3.786162 | 2.739902 | 2.859487 | 3.149828 | 2.807738  |
| ENSMUSG Gk5        | 1.479208 | 1.587672 | 1.656614 | 0.680948 | 1.745675 | 1.547719  |
| ENSMUSG Etaa1      | 2.988621 | 2.707639 | 3.191703 | 2.62413  | 2.710117 | 2.807399  |
| ENSMUSG Pom121l2   | 0        | 0        | 0        | 0        | 0        | 0         |
| ENSMUSG Adgre1     | 6.217288 | 7.694884 | 8.549663 | 15.5724  | 17.83857 | 20.226451 |
| ENSMUSG C1qa       | 24.0569  | 25.42794 | 28.5377  | 128.1374 | 128.2826 | 129.86762 |
| ENSMUSG Dpep2      | 0.040297 | 0.010458 | 0.039937 | 0.020649 | 0.017845 | 0.058984  |
| ENSMUSG Arhgap33   | 1.6364   | 1.461375 | 1.771067 | 1.700339 | 1.794581 | 1.756814  |
| ENSMUSG Acaa2      | 66.52168 | 69.55743 | 54.7365  | 54.32354 | 59.07667 | 54.804508 |
| ENSMUSG Top3b      | 14.34174 | 14.12179 | 14.41247 | 13.51262 | 12.6383  | 12.700187 |
| ENSMUSG Dlg1       | 24.39064 | 23.68516 | 20.60237 | 19.01655 | 19.58838 | 18.35017  |
| ENSMUSG Ppil2      | 22.68634 | 23.14476 | 23.8069  | 22.68176 | 22.56331 | 22.228399 |
| ENSMUSG Senp5      | 8.159157 | 7.500497 | 7.76145  | 7.500331 | 7.226988 | 7.799366  |
| ENSMUSG Ypel1      | 0.717255 | 0.816685 | 0.768954 | 0.774137 | 0.876408 | 0.502828  |
| ENSMUSG Ncbp2      | 19.61254 | 21.67411 | 20.89977 | 19.0169  | 19.30282 | 19.197903 |
| ENSMUSG Lgals2     | 3.573918 | 4.702001 | 3.740566 | 1.646099 | 1.841064 | 1.884798  |
| ENSMUSG Olfr1291-r | 0        | 0        | 0        | 0        | 0        | 0         |



|                    |          |          |          |          |          |           |
|--------------------|----------|----------|----------|----------|----------|-----------|
| ENSMUSG Camta2     | 14.18444 | 14.53273 | 14.58693 | 13.06039 | 13.07663 | 13.03082  |
| ENSMUSG Creg1      | 60.56869 | 58.75634 | 58.50763 | 71.72987 | 71.86874 | 77.551511 |
| ENSMUSG St8sia4    | 13.79388 | 13.65121 | 12.37372 | 14.88677 | 14.04762 | 13.454976 |
| ENSMUSG Vmn1r163   | 0        | 0        | 0        | 0        | 0        | 0         |
| ENSMUSG Il17rd     | 8.463681 | 8.178748 | 7.477075 | 4.92205  | 5.53053  | 4.803616  |
| ENSMUSG Vmn1r160   | 0        | 0        | 0        | 0        | 0        | 0         |
| ENSMUSG Rsc1a1     | 0.166637 | 0.025111 | 0.691994 | 0.03358  | 0.327698 | 0.044585  |
| ENSMUSG Gm21773    | 0        | 0        | 0        | 0        | 0        | 0         |
| ENSMUSG A030005L1  | 0.147672 | 0.063753 | 0.216515 | 0        | 0.056749 | 0.138711  |
| ENSMUSG Pld4       | 13.8663  | 12.79735 | 19.66251 | 26.34031 | 24.33809 | 23.685852 |
| ENSMUSG Aldh1a2    | 11.4835  | 14.87261 | 9.964883 | 10.48367 | 7.771275 | 16.797192 |
| ENSMUSG Twnk       | 3.301008 | 3.972136 | 3.250665 | 3.597814 | 3.332308 | 3.367165  |
| ENSMUSG Mrpl43     | 20.99426 | 19.47019 | 19.28198 | 20.59373 | 21.20736 | 22.518097 |
| ENSMUSG Ybx1       | 267.9325 | 271.6878 | 283.9096 | 252.2029 | 272.3332 | 260.96959 |
| ENSMUSG Mogat1     | 0        | 0.081427 | 0.061356 | 0.227644 | 0.187605 | 0.250466  |
| ENSMUSG Ccdc30     | 1.969076 | 2.075653 | 1.404947 | 2.754375 | 2.493196 | 2.124866  |
| ENSMUSG Ppcs       | 5.962325 | 5.905942 | 7.709121 | 6.552081 | 7.401268 | 7.023302  |
| ENSMUSG Edn2       | 0        | 0        | 0        | 0.060108 | 0.113522 | 0.037795  |
| ENSMUSG Hivep3     | 1.866707 | 1.723467 | 1.52252  | 1.931125 | 1.840419 | 2.401966  |
| ENSMUSG Ctps       | 14.45882 | 15.47862 | 17.14002 | 12.52833 | 13.84181 | 15.328119 |
| ENSMUSG Ndufb8     | 39.2014  | 43.04989 | 46.79333 | 45.09339 | 47.1651  | 52.045092 |
| ENSMUSG Kcnq4      | 1.30636  | 1.422409 | 1.661988 | 1.200796 | 1.122512 | 0.986353  |
| ENSMUSG Dyrk2      | 17.70349 | 16.59964 | 15.90996 | 13.59356 | 14.52136 | 12.725101 |
| Mus_musc Mus_musc  | 0        | 0        | 0        | 0        | 0.186692 | 0         |
| ENSMUSG Mmd2       | 0        | 0.013863 | 0        | 0.015424 | 0        | 0.102394  |
| Mus_musc Mus_musc  | 0        | 0.097867 | 0.306976 | 0.219272 | 0.192331 | 0.336233  |
| ENSMUSG Eme1       | 0.167384 | 0.088975 | 0.032856 | 0.477279 | 0.690823 | 0.543363  |
| ENSMUSG Myo16      | 0.268926 | 0.152437 | 0.170491 | 0.076219 | 0.038021 | 0.037999  |
| ENSMUSG Osbpl2     | 29.0407  | 29.21104 | 28.19197 | 21.20675 | 23.37899 | 23.66139  |
| ENSMUSG Olfr686    | 0        | 0        | 0        | 0        | 0        | 0         |
| ENSMUSG Pop5       | 12.09635 | 12.26153 | 10.45298 | 12.30959 | 15.9798  | 13.899731 |
| ENSMUSG Hrh3       | 0.060176 | 0        | 0.0108   | 0.058648 | 0        | 0.030357  |
| ENSMUSG Ak5        | 0.190295 | 0.317952 | 0.316317 | 0.124058 | 0.177149 | 0.16063   |
| ENSMUSG Pla2g7     | 9.603893 | 7.187578 | 15.94127 | 38.62751 | 42.66366 | 41.821861 |
| ENSMUSG Slc25a27   | 1.862919 | 1.478406 | 1.525499 | 1.023745 | 1.296775 | 0.868251  |
| ENSMUSG Flywch2    | 2.559996 | 2.232403 | 2.878382 | 3.707354 | 1.347736 | 2.279079  |
| ENSMUSG Gpc3       | 72.7279  | 85.87817 | 70.47485 | 56.44837 | 46.73304 | 64.211344 |
| ENSMUSG Tnfrsf21   | 23.81664 | 22.90235 | 18.44096 | 13.83771 | 17.45988 | 14.454482 |
| ENSMUSG Mep1a      | 0        | 0        | 0        | 0.037126 | 0        | 0         |
| ENSMUSG Cenpq      | 1.657205 | 1.681888 | 2.494377 | 1.989819 | 2.52667  | 2.696483  |
| ENSMUSG Adgrf4     | 0.018434 | 0        | 0.0477   | 0        | 0        | 0         |
| ENSMUSG Gbx1       | 0.031384 | 0        | 0.014098 | 0.041764 | 0        | 0         |
| ENSMUSG BC003965   | 4.198686 | 4.24707  | 4.584916 | 4.590121 | 4.621714 | 4.389711  |
| ENSMUSG Tbx3       | 49.52671 | 45.24025 | 47.12283 | 26.36646 | 24.14449 | 19.110779 |
| ENSMUSG Gm17175    | 0        | 0        | 0        | 0        | 0        | 0         |
| ENSMUSG Phf11c     | 0.48019  | 0.350232 | 0.759637 | 0.78775  | 0.511852 | 0.824578  |
| ENSMUSG Gm3182     | 0        | 0        | 0        | 0        | 0        | 0         |
| ENSMUSG Olfr548-ps | 0        | 0        | 0        | 0        | 0        | 0         |
| ENSMUSG Olfr547    | 0        | 0        | 0        | 0        | 0        | 0         |
| ENSMUSG Olfr555    | 0        | 0        | 0        | 0        | 0        | 0         |
| ENSMUSG Olfr554    | 0        | 0        | 0.011151 | 0        | 0        | 0         |
| ENSMUSG Olfr553    | 0        | 0.023232 | 0        | 0.003111 | 0        | 0.012659  |
| ENSMUSG Olfr552    | 0.013367 | 0.03882  | 0        | 0        | 0        | 0.027416  |
| ENSMUSG Olfr551    | 0.012893 | 0.025803 | 0.00932  | 0        | 0.051215 | 0.014728  |
| ENSMUSG Olfr550    | 0.381439 | 0.551649 | 0.477066 | 0.256247 | 0.244581 | 0.155618  |
| ENSMUSG Gm37240    | 1.811741 | 2.638748 | 2.118721 | 1.541934 | 5.207917 | 1.973932  |
| ENSMUSG Olfr549    | 0        | 0.046406 | 0        | 0        | 0        | 0         |
| ENSMUSG Grk4       | 1.205046 | 1.479018 | 1.172171 | 2.159497 | 1.298163 | 2.106318  |
| ENSMUSG Olfr573-ps | 0        | 0        | 0        | 0        | 0        | 0         |
| ENSMUSG Rpl12      | 184.3526 | 174.3742 | 190.6506 | 224.4786 | 209.007  | 221.8331  |
| ENSMUSG Pogz       | 7.948954 | 8.24033  | 7.894018 | 6.333312 | 6.874987 | 6.044582  |
| ENSMUSG Ccdc68     | 16.11324 | 16.80965 | 17.44718 | 12.70323 | 12.33093 | 11.581991 |
| ENSMUSG Kat7       | 21.63167 | 20.72236 | 20.33637 | 16.54896 | 19.51929 | 17.480833 |
| ENSMUSG Gm18596    | 0        | 0        | 0        | 0        | 0        | 0         |

|                   |          |          |          |          |          |           |
|-------------------|----------|----------|----------|----------|----------|-----------|
| Mus_musc Mus_musc | 0.154983 | 0        | 0        | 0        | 0        | 0.334326  |
| ENSMUSG Rtl5      | 2.409427 | 2.256584 | 2.391166 | 2.522258 | 2.548678 | 2.125198  |
| ENSMUSG Poc1b     | 7.574575 | 7.393896 | 7.242986 | 4.950712 | 7.008045 | 5.592876  |
| ENSMUSG Uhrf1bp1l | 11.52785 | 11.04972 | 8.885536 | 14.73432 | 13.39907 | 14.449764 |
| ENSMUSG 1700016K  | 5.529472 | 7.88904  | 4.846138 | 9.962378 | 11.06127 | 8.325779  |
| ENSMUSG RPS10-NU  | 0        | 0        | 0        | 0        | 0        | 0         |
| ENSMUSG Nlrp4f    | 0        | 0        | 0        | 0        | 0        | 0         |
| ENSMUSG Foxj3     | 13.01752 | 13.66326 | 11.46013 | 11.61426 | 10.97402 | 10.758289 |
| ENSMUSG Chpf      | 13.43441 | 11.68288 | 12.97805 | 14.04342 | 14.78532 | 14.944865 |
| ENSMUSG Polrmt    | 7.282468 | 6.544145 | 7.117673 | 5.508763 | 6.35664  | 6.323109  |
| ENSMUSG Nudcd2    | 9.298561 | 8.534648 | 9.057944 | 10.9309  | 11.53893 | 11.969185 |
| ENSMUSG Olfr816   | 0        | 0        | 0        | 0        | 0        | 0         |
| ENSMUSG Prss57    | 0        | 0.042973 | 0.052074 | 0.072612 | 0.027986 | 0.083403  |
| ENSMUSG Fstl3     | 16.35922 | 13.33826 | 15.8573  | 10.30358 | 10.89492 | 10.129541 |
| ENSMUSG Itga6     | 20.30386 | 17.58912 | 23.1661  | 15.53663 | 15.20368 | 13.258072 |
| ENSMUSG Ccng1     | 34.50315 | 37.53461 | 34.47611 | 43.38418 | 42.0369  | 42.390137 |
| ENSMUSG Gng7      | 1.291897 | 1.285989 | 1.174655 | 1.33108  | 0.905836 | 0.837259  |
| ENSMUSG 4930467E2 | 0.034336 | 0.06048  | 0.030575 | 0.059179 | 0        | 0         |
| ENSMUSG Crebrf    | 19.63547 | 19.9203  | 17.53037 | 15.89765 | 15.29429 | 14.002512 |
| ENSMUSG Olfr1392  | 0.01537  | 0        | 0        | 0        | 0        | 0.011292  |
| ENSMUSG Msi1      | 0.099687 | 0.37817  | 0.21148  | 0.135192 | 0.29587  | 0.203939  |
| ENSMUSG Fgfr3     | 64.86905 | 63.27583 | 65.86615 | 32.26637 | 32.27433 | 32.091226 |
| ENSMUSG Pwil2     | 0.085746 | 0.036882 | 0.071272 | 0.333248 | 0.202035 | 0.286133  |
| ENSMUSG Mrpl44    | 8.716607 | 9.522312 | 10.19546 | 8.715848 | 11.32806 | 10.587352 |
| ENSMUSG Serpine2  | 24.5772  | 25.63461 | 26.19122 | 30.27613 | 35.52177 | 32.563883 |
| ENSMUSG Farsb     | 12.61866 | 13.984   | 12.6282  | 13.78908 | 14.51859 | 13.909254 |
| ENSMUSG Alpl2     | 0        | 0        | 0        | 0        | 0        | 0         |
| ENSMUSG Ecel1     | 0.054928 | 0        | 0        | 0.053817 | 0        | 0.018157  |
| ENSMUSG Cops7b    | 3.609337 | 4.777181 | 4.564198 | 5.167235 | 4.474966 | 5.237187  |
| ENSMUSG Nppc      | 0.156994 | 0.044427 | 0.20428  | 0.049433 | 0.112338 | 0.22113   |
| ENSMUSG Ryr1      | 0.134945 | 0.100274 | 0.100846 | 0.174455 | 0.109939 | 0.16387   |
| ENSMUSG Psmc8     | 48.96464 | 49.90843 | 47.9973  | 61.62519 | 58.42825 | 62.45056  |
| ENSMUSG Fam98c    | 11.6001  | 9.42078  | 10.80088 | 7.622629 | 9.399431 | 10.812702 |
| ENSMUSG Nfkbib    | 16.71551 | 17.18252 | 16.49283 | 17.98957 | 17.88001 | 19.696004 |
| ENSMUSG Fbxo17    | 0.876967 | 1.017982 | 1.003537 | 1.560815 | 0.597162 | 1.103531  |
| ENSMUSG Prss29    | 0        | 0        | 0        | 0        | 0        | 0         |
| ENSMUSG Ccdc182   | 0        | 0        | 0        | 0        | 0        | 0         |
| ENSMUSG Rpap1     | 5.227966 | 4.676924 | 4.394705 | 4.502927 | 5.341792 | 5.20501   |
| ENSMUSG Ccdc17    | 5.570068 | 5.531969 | 4.611712 | 8.98681  | 5.766725 | 6.874938  |
| ENSMUSG Fgd5      | 25.76567 | 22.58489 | 23.12655 | 13.71806 | 15.5079  | 14.101871 |
| ENSMUSG Gm14548   | 2.323284 | 2.201761 | 2.957123 | 2.91735  | 3.567635 | 4.07078   |
| ENSMUSG Nop9      | 5.917424 | 4.972397 | 5.010163 | 5.090246 | 6.817717 | 6.724398  |
| ENSMUSG Gm15448   | 2.370934 | 2.270258 | 2.498435 | 3.73161  | 3.865102 | 4.806912  |
| ENSMUSG Irx1      | 68.43422 | 64.91674 | 59.53014 | 42.04114 | 56.70702 | 53.603218 |
| ENSMUSG Dmkn      | 5.330234 | 8.37226  | 3.883066 | 10.55044 | 9.344883 | 11.186925 |
| ENSMUSG Slc4a4    | 3.507541 | 3.605998 | 3.125405 | 2.46381  | 2.575984 | 2.525822  |
| ENSMUSG Etd       | 0        | 0        | 0        | 0        | 0        | 0         |
| ENSMUSG Homer3    | 25.72721 | 25.41638 | 28.07059 | 18.92056 | 19.55534 | 18.387825 |
| ENSMUSG Nagpa     | 14.37654 | 10.85115 | 13.82209 | 13.80279 | 15.19725 | 14.373082 |
| ENSMUSG Crtc1     | 3.150428 | 2.974913 | 2.907512 | 2.934911 | 2.771066 | 3.279102  |
| ENSMUSG Wrb       | 7.293545 | 7.328075 | 7.19349  | 6.916812 | 6.954495 | 6.284644  |
| ENSMUSG 4930444G  | 0        | 0.026023 | 0        | 0        | 0        | 0         |
| ENSMUSG Gm11568   | 0        | 0        | 0        | 0        | 0        | 0         |
| ENSMUSG Gm11563   | 0        | 0        | 0        | 0        | 0        | 0         |
| ENSMUSG Bloc1s6   | 9.888947 | 10.23132 | 11.96031 | 9.761212 | 10.48224 | 10.531764 |
| ENSMUSG Mmp8      | 2.249166 | 1.985085 | 2.749305 | 1.667326 | 1.409315 | 1.018683  |
| ENSMUSG Sqor      | 23.61982 | 29.2841  | 27.48732 | 22.13451 | 20.95466 | 20.40776  |
| ENSMUSG Slc30a4   | 8.557479 | 7.93069  | 6.761513 | 6.522881 | 7.352381 | 6.536754  |
| ENSMUSG 5730507C  | 0.205118 | 0.271347 | 0.187749 | 0.322839 | 0.279231 | 0.375872  |
| ENSMUSG Gm45753   | 0        | 0        | 0        | 0        | 0        | 0         |
| ENSMUSG Cbr4      | 1.527401 | 1.332519 | 1.757886 | 1.816549 | 2.104975 | 1.838742  |
| ENSMUSG Sh3rf1    | 7.819506 | 9.910665 | 8.87853  | 6.355856 | 6.151203 | 7.325899  |
| ENSMUSG Nek1      | 4.815482 | 5.260841 | 4.334037 | 5.184337 | 5.033344 | 4.453306  |
| ENSMUSG F11       | 0        | 0.063102 | 0.006788 | 0        | 0.034838 | 0         |

|                   |          |          |          |          |          |           |
|-------------------|----------|----------|----------|----------|----------|-----------|
| ENSMUSG Mfap3l    | 7.053118 | 8.412035 | 6.686769 | 6.750041 | 7.08868  | 6.682544  |
| ENSMUSG Catsperg1 | 0.945343 | 0.78257  | 1.307321 | 0.759863 | 0.443295 | 0.835422  |
| ENSMUSG Olfr714   | 0        | 0        | 0        | 0        | 0        | 0         |
| ENSMUSG Zbtb14    | 10.83411 | 13.8297  | 11.36646 | 9.427378 | 9.44811  | 9.351869  |
| ENSMUSG Morn4     | 1.108412 | 0.836805 | 0.600672 | 1.605721 | 1.265211 | 1.108972  |
| ENSMUSG Nacc2     | 7.003052 | 7.544568 | 7.605933 | 6.92872  | 7.389969 | 7.369263  |
| ENSMUSG Camsap1   | 6.521819 | 6.752827 | 5.536243 | 4.362892 | 4.766463 | 4.354758  |
| ENSMUSG Gpsm1     | 8.249135 | 8.044839 | 8.111939 | 4.98185  | 5.629818 | 5.725887  |
| ENSMUSG 1700019N  | 0        | 0        | 0        | 0        | 0        | 0         |
| ENSMUSG Lcn3      | 0        | 0        | 0        | 0        | 0        | 0         |
| ENSMUSG Lcn5      | 0        | 0        | 0        | 0        | 0        | 0         |
| ENSMUSG Lhx3      | 0.025375 | 0        | 0        | 0        | 0        | 0         |
| ENSMUSG Fcna      | 1.2376   | 2.147246 | 0.644392 | 5.134996 | 3.46957  | 7.108396  |
| ENSMUSG Tmem141   | 4.373446 | 6.952263 | 6.308233 | 7.440782 | 5.004177 | 5.842063  |
| ENSMUSG Nlrp4c    | 0        | 0        | 0        | 0        | 0        | 0         |
| ENSMUSG Ptpn11    | 37.78272 | 38.05994 | 38.5051  | 28.9116  | 30.01379 | 30.98594  |
| ENSMUSG Fip111    | 18.57657 | 20.14801 | 17.73174 | 15.41119 | 16.89788 | 17.700495 |
| ENSMUSG Uchl1     | 1.168287 | 1.834274 | 1.252166 | 0.63626  | 0.421287 | 0.698406  |
| ENSMUSG Cct5      | 66.51453 | 75.10264 | 74.86953 | 71.78372 | 72.38667 | 73.96337  |
| ENSMUSG Slc30a9   | 13.07029 | 14.90378 | 13.06855 | 10.36328 | 10.89095 | 10.361071 |
| ENSMUSG Ropn1l    | 0.959609 | 1.04324  | 0.579538 | 2.162746 | 2.073514 | 2.51394   |
| ENSMUSG Chic2     | 2.80504  | 2.940293 | 2.615541 | 2.740535 | 2.360208 | 2.332817  |
| ENSMUSG Lnx1      | 1.112482 | 1.137658 | 0.911813 | 1.246933 | 1.399824 | 1.482996  |
| ENSMUSG Lzts2     | 30.73078 | 29.84467 | 32.87388 | 24.94795 | 24.63592 | 25.690153 |
| ENSMUSG Eqtn      | 0        | 0.043615 | 0        | 0        | 0        | 0         |
| ENSMUSG Ift74     | 4.910574 | 6.179971 | 5.066031 | 6.358179 | 6.080393 | 5.448786  |
| ENSMUSG Plaa      | 15.07159 | 14.53101 | 13.73353 | 16.05947 | 15.99098 | 15.612034 |
| ENSMUSG Cyp2j13   | 0        | 0        | 0        | 0        | 0        | 0         |
| ENSMUSG Hook1     | 4.326392 | 3.981489 | 3.33785  | 5.382935 | 5.536034 | 5.404684  |
| ENSMUSG Fggy      | 1.155091 | 0.839959 | 1.9394   | 1.304969 | 1.507027 | 1.288924  |
| ENSMUSG Caap1     | 3.487238 | 4.224769 | 3.936565 | 3.536319 | 2.90587  | 3.071898  |
| ENSMUSG Kctd4     | 0        | 0        | 0        | 0.027247 | 0.012515 | 0         |
| ENSMUSG Olfr689   | 0        | 0        | 0        | 0        | 0        | 0         |
| ENSMUSG Gm4871    | 0        | 0        | 0        | 0        | 0.040875 | 0         |
| Mus_musc Mus_musc | 1.512113 | 1.119934 | 1.49396  | 1.433716 | 1.087481 | 0.949069  |
| Mus_musc Mus_musc | 0.056697 | 0.172651 | 0.114519 | 0.524433 | 0.587368 | 0.371888  |
| ENSMUSG Fbxw20    | 0        | 0        | 0        | 0        | 0        | 0         |
| ENSMUSG Sra1      | 25.22742 | 17.89365 | 22.55182 | 23.67291 | 20.51938 | 21.501925 |
| ENSMUSG Atp5g1    | 15.18167 | 22.18557 | 17.90615 | 27.69791 | 21.82926 | 23.413622 |
| ENSMUSG Calcoco2  | 0.292197 | 0.443889 | 0.0865   | 0.114651 | 0.30958  | 0.343173  |
| ENSMUSG Olfr692   | 0        | 0.039331 | 0        | 0        | 0        | 0         |
| ENSMUSG Snf8      | 22.22361 | 21.97766 | 24.64698 | 22.75445 | 21.79176 | 24.401555 |
| Mus_musc Mus_musc | 0        | 0        | 0        | 0.157538 | 0.258209 | 0         |
| ENSMUSG Zfp386    | 5.40462  | 4.82755  | 4.096422 | 5.501237 | 5.092311 | 5.382436  |
| Mus_musc Mus_musc | 0        | 0        | 0        | 0        | 0.087977 | 0.304813  |
| Mus_musc Mus_musc | 0.600705 | 0.308281 | 0.364976 | 0.159108 | 0.267825 | 0.272837  |
| ENSMUSG Tmcc2     | 84.41415 | 78.77082 | 128.6648 | 55.32853 | 51.09577 | 49.90117  |
| ENSMUSG Myo3b     | 0.118557 | 0.101228 | 0.111472 | 0.128954 | 0.091108 | 0.208648  |
| Mus_musc Mus_musc | 0        | 0        | 0        | 0        | 0.903984 | 0         |
| ENSMUSG Ift22     | 4.802265 | 6.115016 | 5.154529 | 5.517312 | 4.948081 | 5.024318  |
| Mus_musc Mus_musc | 0        | 0.21626  | 0        | 0        | 0        | 0         |
| Mus_musc Mus_musc | 0.483885 | 0.756131 | 0.369094 | 0.447992 | 0.446495 | 0.3393    |
| ENSMUSG Lmo2      | 43.00797 | 34.87165 | 44.94294 | 29.00533 | 26.0651  | 28.000237 |
| ENSMUSG Oas2      | 2.478569 | 1.987706 | 6.077096 | 2.399739 | 1.805622 | 1.847959  |
| ENSMUSG Nlrp3     | 1.469296 | 1.366699 | 1.66166  | 0.960867 | 0.778481 | 0.645637  |
| ENSMUSG Fbxo48    | 0.394866 | 0.121374 | 0.269723 | 0.321407 | 0.192689 | 0.62205   |
| ENSMUSG Napepld   | 2.506361 | 3.173072 | 2.591261 | 2.96353  | 2.935068 | 3.065717  |
| ENSMUSG Mroh3     | 0        | 0        | 0        | 0.036499 | 0.010312 | 0         |
| ENSMUSG Kif28     | 0.000348 | 0.005083 | 0.000421 | 0.00041  | 6.60E-05 | 0.000101  |
| ENSMUSG Cxcr4     | 50.17376 | 35.3587  | 40.4746  | 48.15672 | 61.14034 | 57.78845  |
| ENSMUSG Olfr433   | 0.038997 | 0.016981 | 0.091651 | 0.107844 | 0.09615  | 0.108309  |
| ENSMUSG Olfr808   | 0        | 0        | 0        | 0        | 0        | 0         |
| ENSMUSG Hhatl     | 0.245949 | 0.514419 | 0.250242 | 0.472992 | 0.389159 | 0.399997  |
| ENSMUSG Nktr      | 15.29581 | 15.84622 | 15.56923 | 16.30998 | 15.44713 | 16.160618 |

|                   |          |          |          |          |          |           |
|-------------------|----------|----------|----------|----------|----------|-----------|
| ENSMUSG Ss18l2    | 6.494553 | 8.702254 | 10.36956 | 9.31189  | 8.908385 | 9.209727  |
| ENSMUSG Pccb      | 24.77428 | 28.02237 | 22.12304 | 23.09553 | 20.88056 | 22.510416 |
| ENSMUSG Vipr1     | 1.351855 | 1.559997 | 1.005392 | 1.457039 | 1.638719 | 1.750164  |
| ENSMUSG Serpina3k | 0.12185  | 0        | 0.609274 | 0.09219  | 0.653028 | 0.117758  |
| ENSMUSG Olfr66    | 0        | 0        | 0        | 0        | 0        | 0         |
| ENSMUSG Ccdc178   | 0        | 0        | 0        | 0        | 0.015934 | 0         |
| ENSMUSG Cdh2      | 1.29442  | 1.923146 | 1.926353 | 1.243104 | 1.473262 | 0.959723  |
| ENSMUSG Tmprss11c | 0        | 0        | 0        | 0        | 0        | 0         |
| ENSMUSG Cldn34c1  | 0        | 0.009948 | 0        | 0        | 0        | 0         |
| ENSMUSG Olfr728   | 0        | 0        | 0        | 0        | 0        | 0         |
| ENSMUSG Myo1f     | 12.75225 | 10.72732 | 18.54921 | 24.7822  | 24.16687 | 28.856405 |
| ENSMUSG Pfdn6     | 22.94313 | 21.29048 | 25.33747 | 21.81326 | 18.32328 | 18.910268 |
| ENSMUSG Tapbp     | 90.25161 | 78.95496 | 123.0176 | 97.10888 | 88.09387 | 95.220099 |
| ENSMUSG Olfr1288  | 0        | 0        | 0        | 0        | 0        | 0         |
| Mus_musc Mus_musc | 0        | 0        | 0        | 0.306214 | 0.182128 | 0.160682  |
| ENSMUSG Lrrc3c    | 0        | 0        | 0        | 0        | 0        | 0         |
| ENSMUSG Ccdc141   | 14.22157 | 13.54752 | 13.45355 | 11.0073  | 10.20035 | 10.359506 |
| Mus_musc Mus_musc | 0        | 0        | 0        | 0.129352 | 0.269459 | 0.184186  |
| ENSMUSG Irf2bp1   | 15.68866 | 13.76129 | 13.71157 | 11.07453 | 11.60019 | 12.523789 |
| ENSMUSG Als2cl    | 23.52551 | 21.30946 | 22.75658 | 15.95124 | 15.58532 | 15.381323 |
| Mus_musc Mus_musc | 0        | 0        | 0        | 0.390445 | 0.31234  | 0.602624  |
| Mus_musc Mus_musc | 0.088087 | 0        | 0.248078 | 0.391928 | 0        | 0         |
| ENSMUSG Npb       | 0        | 0.162281 | 0.566341 | 0.411603 | 0        | 0.218849  |
| Mus_musc Mus_musc | 0.125888 | 0.289248 | 0.152303 | 0.298419 | 0.164845 | 0.308675  |
| Mus_musc Mus_musc | 0.404602 | 0.420971 | 0.121788 | 0.421557 | 0.322797 | 0.291214  |
| ENSMUSG Nfix      | 25.99561 | 22.34276 | 22.49218 | 19.5969  | 20.07395 | 19.450523 |
| ENSMUSG Nacc1     | 20.04002 | 21.22475 | 20.00549 | 20.96352 | 20.04514 | 23.349371 |
| Mus_musc Mus_musc | 0        | 0        | 0.45733  | 0.227328 | 0.658923 | 0.147667  |
| Mus_musc Mus_musc | 0        | 0        | 0        | 0        | 0        | 0         |
| ENSMUSG Ccdc28a   | 4.880138 | 5.641351 | 4.294315 | 6.03461  | 5.265505 | 4.424254  |
| ENSMUSG Tor4a     | 19.22635 | 19.10552 | 18.26461 | 21.44042 | 21.52876 | 21.662811 |
| ENSMUSG Stard6    | 0.323084 | 0.387978 | 0.440091 | 0.517386 | 0.375676 | 0.578742  |
| ENSMUSG Ap1ar     | 15.17493 | 14.3356  | 16.17116 | 12.83468 | 12.69053 | 12.557957 |
| ENSMUSG Olfr419   | 0        | 0.084813 | 0        | 0        | 0        | 0         |
| ENSMUSG Mbp       | 13.85846 | 14.30457 | 12.51648 | 12.98144 | 11.61679 | 13.807641 |
| ENSMUSG Inava     | 0.632608 | 0.934035 | 0.5811   | 1.811313 | 1.444849 | 2.371573  |
| ENSMUSG Bicdl1    | 7.37261  | 6.0676   | 6.484465 | 6.097702 | 4.472299 | 5.918888  |
| ENSMUSG Entpd3    | 1.001527 | 1.062222 | 0.861462 | 0.58716  | 0.67459  | 0.712501  |
| ENSMUSG Ccdc126   | 8.723826 | 9.711159 | 8.20521  | 6.914223 | 8.099854 | 6.205919  |
| ENSMUSG Frat2     | 1.768157 | 1.719395 | 1.470706 | 1.400987 | 1.471077 | 1.529146  |
| ENSMUSG Ankrd34c  | 0        | 0        | 0        | 0        | 0        | 0         |
| ENSMUSG Zfp235    | 2.414624 | 2.400961 | 2.667051 | 2.297327 | 2.383187 | 1.89427   |
| ENSMUSG Fry       | 8.988256 | 11.51177 | 8.193849 | 5.26643  | 6.867964 | 5.943909  |
| ENSMUSG Acsbg1    | 0.638724 | 0.268327 | 0.337755 | 1.245938 | 0.883483 | 1.419321  |
| ENSMUSG Mcfd2     | 42.85952 | 42.82367 | 50.49627 | 42.54691 | 43.72274 | 47.494907 |
| ENSMUSG Fam83d    | 0.405686 | 0.639982 | 0.434492 | 0.692762 | 0.782444 | 1.123569  |
| ENSMUSG Dhx35     | 4.260109 | 4.602361 | 3.734009 | 3.771074 | 3.549855 | 3.970801  |
| ENSMUSG Wisp2     | 21.71506 | 15.35467 | 27.77029 | 20.25482 | 13.75007 | 16.592728 |
| ENSMUSG Tti1      | 7.282977 | 7.067938 | 7.025856 | 6.414677 | 6.507662 | 6.535048  |
| ENSMUSG Rprd1b    | 11.90701 | 11.39104 | 10.95253 | 9.900826 | 10.27387 | 10.161536 |
| ENSMUSG Ralgapb   | 14.77225 | 16.01455 | 12.74051 | 13.24137 | 13.05218 | 13.11709  |
| ENSMUSG 4930564Dl | 0        | 0        | 0        | 0        | 0        | 0.02924   |
| ENSMUSG Gtf2a1l   | 0        | 0        | 0        | 0        | 0        | 0         |
| ENSMUSG Otulinl   | 8.435074 | 8.546817 | 11.07373 | 9.624365 | 9.585102 | 9.576579  |
| ENSMUSG 9330159F1 | 0.925085 | 0.49192  | 0.469507 | 0.268728 | 0.353637 | 0.298288  |
| ENSMUSG Sst       | 0.078238 | 0        | 0        | 0.062752 | 0        | 0         |
| ENSMUSG Cul3      | 25.24337 | 25.03586 | 23.1094  | 22.08346 | 22.20457 | 21.194461 |
| ENSMUSG Hnrnpr    | 16.30061 | 13.60827 | 12.05114 | 15.54532 | 15.14548 | 17.477968 |
| ENSMUSG Ubr4      | 19.36341 | 19.1047  | 16.72731 | 16.71873 | 17.98982 | 17.470664 |
| ENSMUSG Gm13023   | 0        | 0        | 0        | 0        | 0        | 0         |
| ENSMUSG Oog2      | 0        | 0        | 0        | 0        | 0        | 0         |
| ENSMUSG Prame     | 0        | 0        | 0        | 0        | 0        | 0         |
| ENSMUSG Gm21775   | 0        | 0        | 0        | 0        | 0        | 0         |
| ENSMUSG Chst3     | 6.194954 | 4.522316 | 5.761461 | 5.693723 | 5.535551 | 5.245713  |

|                   |          |          |          |          |          |           |
|-------------------|----------|----------|----------|----------|----------|-----------|
| ENSMUSG Gm20917   | 0        | 0        | 0        | 0        | 0        | 0         |
| ENSMUSG Vmn1r77   | 0        | 0        | 0        | 0        | 0        | 0         |
| ENSMUSG Tmem185l  | 7.749372 | 6.091009 | 7.285312 | 7.167013 | 7.36106  | 7.496719  |
| ENSMUSG Slc26a1   | 0.065949 | 0.028858 | 0.122371 | 0.066762 | 0.051986 | 0.094514  |
| ENSMUSG Spz1      | 0        | 0        | 0        | 0        | 0        | 0         |
| ENSMUSG Mia       | 0.307922 | 0.488161 | 0.253492 | 0.86389  | 1.626697 | 0.972052  |
| ENSMUSG Fcor      | 0.711354 | 0.924281 | 1.366142 | 1.096479 | 1.004424 | 0.58075   |
| ENSMUSG Tnfsf13   | 7.706487 | 8.083687 | 8.879709 | 11.35562 | 9.005036 | 8.369481  |
| ENSMUSG Oog3      | 0        | 0        | 0        | 0        | 0        | 0         |
| ENSMUSG Gm21761   | 0        | 0        | 0.078902 | 0        | 0        | 0         |
| ENSMUSG Ecpas     | 14.23456 | 14.1972  | 13.23593 | 14.10313 | 14.62835 | 13.136394 |
| ENSMUSG Olfr332   | 0        | 0        | 0        | 0        | 0        | 0         |
| ENSMUSG Olfr1441  | 0        | 0        | 0        | 0        | 0        | 0         |
| ENSMUSG Nav1      | 10.19935 | 7.09223  | 7.272551 | 6.647634 | 8.668074 | 7.907846  |
| ENSMUSG Olfr330   | 0        | 0        | 0        | 0        | 0        | 0         |
| ENSMUSG Gm11213   | 0        | 0        | 0        | 0.088337 | 0        | 0         |
| ENSMUSG Ubl5      | 38.23332 | 29.81829 | 29.4205  | 26.89075 | 26.99609 | 37.553727 |
| Mus_musc Mus_musc | 0.290046 | 0.282631 | 0.91389  | 1.023004 | 0.769943 | 1.134956  |
| Mus_musc Mus_musc | 0        | 0        | 0        | 0.063608 | 0        | 0         |
| Mus_musc Mus_musc | 0        | 0.245244 | 0        | 0        | 0        | 0.290635  |
| Mus_musc Mus_musc | 0        | 0        | 0        | 0        | 0        | 0.930613  |
| Mus_musc Mus_musc | 0.369012 | 0        | 0.212383 | 0.258071 | 0.307098 | 0.380876  |
| ENSMUSG Olfr373   | 0        | 0.003797 | 0.009782 | 0.027622 | 0.029634 | 0.009998  |
| ENSMUSG Gm21776   | 0        | 0        | 0        | 0        | 0        | 0         |
| ENSMUSG Gm12728   | 0        | 0        | 0        | 0        | 0        | 0         |
| ENSMUSG Aldoc     | 2.787455 | 2.731789 | 2.333605 | 2.845688 | 2.786758 | 2.792019  |
| ENSMUSG Gm20837   | 0        | 0        | 0        | 0        | 0        | 0         |
| ENSMUSG Gm7970    | 0        | 0        | 0        | 0        | 0        | 0         |
| Mus_musc Mus_musc | 28.49021 | 22.27802 | 21.66395 | 19.37075 | 19.87145 | 20.578205 |
| Mus_musc Mus_musc | 0.259225 | 0.187527 | 0.426596 | 0.360253 | 0.303268 | 0.221586  |
| Mus_musc Mus_musc | 0.160876 | 0.086103 | 0        | 0        | 0.116019 | 0.052797  |
| Mus_musc Mus_musc | 0.645427 | 0.417563 | 0.469336 | 0.648223 | 0.351104 | 0.32625   |
| ENSMUSG Olfr462   | 0        | 0        | 0        | 0        | 0        | 0         |
| ENSMUSG Rfxap     | 5.745828 | 5.972045 | 7.030344 | 4.737296 | 5.641113 | 5.527578  |
| Mus_musc Mus_musc | 0.4064   | 0.562536 | 0.285055 | 0.22305  | 0.391396 | 0.228279  |
| ENSMUSG lft46     | 8.496835 | 7.756331 | 6.779669 | 8.110907 | 8.163781 | 7.688325  |
| ENSMUSG Cd3g      | 6.988042 | 5.753446 | 6.142968 | 11.01186 | 8.68551  | 10.028519 |
| ENSMUSG Tmem25    | 0.801979 | 0.771527 | 0.635112 | 0.526818 | 0.554252 | 0.758462  |
| ENSMUSG Vmn2r3    | 0        | 0        | 0        | 0        | 0        | 0.009203  |
| Mus_musc Mus_musc | 0.418765 | 0.310091 | 0.460706 | 0.141139 | 0.342032 | 0         |
| Mus_musc Mus_musc | 0        | 0.07732  | 0        | 0.27388  | 0        | 0.357329  |
| ENSMUSG Th        | 0        | 0        | 0        | 0        | 0        | 0         |
| ENSMUSG Xkr9      | 0        | 0        | 0        | 0        | 0        | 0         |
| ENSMUSG Gm28576   | 0        | 0        | 0        | 0        | 0        | 0         |
| ENSMUSG Gm2000    | 17.90841 | 20.80523 | 21.55474 | 25.80406 | 25.82186 | 23.625227 |
| Mus_musc Mus_musc | 0.341006 | 0.150199 | 0        | 0.088061 | 0        | 0         |
| Mus_musc Mus_musc | 0        | 0.09671  | 0.188399 | 0        | 0.186692 | 0         |
| Mus_musc Mus_musc | 0.480223 | 0.673616 | 0.293352 | 0.621663 | 0.780523 | 0.530539  |
| ENSMUSG Myl9      | 54.17706 | 51.0698  | 59.34077 | 61.82973 | 64.29631 | 61.202087 |
| Mus_musc Mus_musc | 0        | 0.10566  | 0        | 0.087437 | 0.339817 | 0         |
| Mus_musc Mus_musc | 0.276517 | 0        | 0        | 0        | 0        | 0         |
| Mus_musc Mus_musc | 0        | 0.160888 | 0        | 0        | 0        | 0.097447  |
| Mus_musc Mus_musc | 0        | 0        | 0        | 0        | 0        | 0.207927  |
| Mus_musc Mus_musc | 0.108195 | 0.392097 | 0.358643 | 0.280423 | 0.406132 | 0         |
| Mus_musc Mus_musc | 0        | 0        | 0        | 0.174016 | 0        | 0         |
| ENSMUSG Ost4      | 48.05556 | 49.97185 | 59.78572 | 66.33534 | 61.61721 | 60.07697  |
| Mus_musc Mus_musc | 0        | 0.201554 | 0        | 0.516682 | 0.353646 | 0         |
| ENSMUSG Mrpl45    | 5.288893 | 5.051279 | 4.839222 | 4.717592 | 5.609898 | 5.719983  |
| ENSMUSG Krt25     | 0        | 0        | 0        | 0        | 0        | 0         |
| ENSMUSG Dohh      | 21.45303 | 20.64481 | 22.505   | 18.43624 | 13.03214 | 18.445663 |
| ENSMUSG Ccdc105   | 0        | 0        | 0        | 0.035534 | 0        | 0         |
| ENSMUSG Dcun1d2   | 10.5369  | 10.65863 | 9.514117 | 9.283744 | 8.969446 | 11.088664 |
| ENSMUSG 9430015G  | 3.919054 | 3.247192 | 3.682864 | 3.44526  | 3.187169 | 3.380167  |
| ENSMUSG Mrgpra2b  | 0.299933 | 0.354159 | 0.888375 | 0.251326 | 0.045185 | 0.038051  |

|                   |          |          |          |          |          |           |
|-------------------|----------|----------|----------|----------|----------|-----------|
| ENSMUSG Zfp781    | 0.599514 | 0.690519 | 0.680817 | 0.706212 | 0.639065 | 0.604085  |
| ENSMUSG Prr3      | 4.742985 | 4.784442 | 5.059475 | 3.943719 | 3.683655 | 4.288441  |
| ENSMUSG Olfr699   | 0        | 0        | 0        | 0        | 0        | 0         |
| ENSMUSG Vmn2r98   | 0        | 0        | 0        | 0        | 0        | 0         |
| ENSMUSG Ptov1     | 36.1624  | 33.92935 | 36.36085 | 30.7127  | 28.20345 | 29.886009 |
| ENSMUSG Olfr788   | 0        | 0        | 0        | 0        | 0        | 0         |
| ENSMUSG Myh15     | 0        | 0        | 0        | 0        | 0        | 0         |
| ENSMUSG Cyp2c69   | 0        | 0        | 0        | 0        | 0        | 0         |
| ENSMUSG Psd       | 1.229735 | 0.610323 | 1.469468 | 2.236674 | 2.186588 | 1.447903  |
| ENSMUSG C1ql4     | 0        | 0        | 0        | 0        | 0        | 0         |
| ENSMUSG Trim58    | 0.043234 | 0.073846 | 0.100653 | 0.030882 | 0        | 0         |
| ENSMUSG Tmprss13  | 0.589764 | 0.800744 | 0.383764 | 0.477378 | 0.406408 | 0.465375  |
| ENSMUSG Gm17482   | 0        | 0        | 0        | 0        | 0        | 0         |
| ENSMUSG Prl8a1    | 0        | 0        | 0        | 0        | 0        | 0         |
| ENSMUSG Capsl     | 7.391379 | 6.703104 | 5.670665 | 8.577493 | 10.82147 | 8.4584    |
| ENSMUSG Zmynd8    | 16.56197 | 15.58016 | 15.77967 | 14.8041  | 15.5853  | 14.514558 |
| ENSMUSG Stmn4     | 0        | 0        | 0        | 0.087328 | 0        | 0         |
| ENSMUSG Kcne2     | 13.71317 | 16.1654  | 14.42894 | 9.270673 | 8.930573 | 11.486574 |
| ENSMUSG Gm36176   | 0        | 0        | 0        | 0        | 0        | 0         |
| ENSMUSG Tbc1d13   | 11.4844  | 11.22081 | 13.0981  | 12.57166 | 12.06544 | 12.519302 |
| ENSMUSG Gm3448    | 0.732758 | 0.617446 | 0.89804  | 1.087293 | 1.440939 | 1.039527  |
| ENSMUSG 1810049J1 | 0        | 0.15154  | 0.133363 | 0.031174 | 0        | 0         |
| ENSMUSG Awat1     | 0        | 0.066608 | 0        | 0.911269 | 1.487092 | 1.27539   |
| ENSMUSG Pdzd11    | 14.24346 | 12.95545 | 12.66504 | 12.79235 | 14.41451 | 12.506212 |
| ENSMUSG Arhgef33  | 0.039279 | 0.073841 | 0.120023 | 0.076279 | 0.148552 | 0.170796  |
| ENSMUSG Stfa3     | 0        | 0        | 0        | 0        | 0        | 0         |
| ENSMUSG Aldh6a1   | 29.7643  | 31.96798 | 24.32094 | 21.77331 | 19.19489 | 18.718667 |
| ENSMUSG Vsx2      | 0        | 0        | 0        | 0        | 0        | 0         |
| ENSMUSG Fam161b   | 2.005588 | 2.101497 | 1.594287 | 1.824127 | 1.849011 | 2.099525  |
| ENSMUSG Coq6      | 6.313468 | 5.70764  | 6.782128 | 5.853028 | 4.936938 | 4.226738  |
| ENSMUSG Entpd5    | 10.95737 | 10.72812 | 8.305846 | 8.268402 | 9.457526 | 9.025538  |
| ENSMUSG Pemt      | 1.401614 | 1.533251 | 0.986079 | 1.272354 | 1.174112 | 1.348589  |
| ENSMUSG Cdh1      | 73.32106 | 74.51533 | 62.76169 | 65.87302 | 71.00351 | 70.542023 |
| ENSMUSG Gm9513    | 0        | 0        | 0        | 0        | 0        | 0         |
| ENSMUSG Cdh4      | 0.982398 | 0.84558  | 0.780126 | 0.921048 | 0.891029 | 0.762868  |
| ENSMUSG Dkc1      | 6.890393 | 7.027525 | 7.188513 | 7.445206 | 8.152332 | 7.277284  |
| ENSMUSG Vmn1r167  | 0        | 0        | 0        | 0        | 0        | 0         |
| ENSMUSG Zscan4d   | 0        | 0        | 0        | 0        | 0        | 0         |
| ENSMUSG Ckmt1     | 7.713115 | 9.606723 | 7.832459 | 17.33054 | 20.24464 | 23.06505  |
| ENSMUSG Tceal6    | 0.08085  | 0.039478 | 0.237633 | 0.041551 | 0.189206 | 0.099203  |
| ENSMUSG lah1      | 10.21913 | 10.67724 | 11.85807 | 14.69239 | 15.29741 | 14.270511 |
| ENSMUSG Gjd4      | 0        | 0        | 0        | 0        | 0        | 0         |
| ENSMUSG Zfp131    | 14.70474 | 16.17627 | 15.6505  | 14.01319 | 13.33382 | 13.917306 |
| ENSMUSG Btbd35f18 | 0        | 0        | 0        | 0        | 0        | 0         |
| ENSMUSG Cebpb     | 3.543717 | 3.740769 | 4.443785 | 2.906671 | 3.49651  | 5.221141  |
| ENSMUSG Olfr130   | 0        | 0        | 0        | 0        | 0        | 0         |
| ENSMUSG Vmn1r129  | 0        | 0        | 0        | 0        | 0        | 0         |
| ENSMUSG 1700001K: | 0.291203 | 0.520775 | 0.380327 | 0.169461 | 0.123158 | 0.241274  |
| ENSMUSG Gm9999    | 0        | 0        | 0        | 0        | 0        | 0         |
| ENSMUSG Dffb      | 3.052644 | 2.011299 | 3.23332  | 3.270071 | 2.302508 | 2.89066   |
| ENSMUSG Trp73     | 1.540177 | 1.587552 | 0.980818 | 2.454141 | 2.252273 | 2.475714  |
| ENSMUSG Mfn2      | 19.39098 | 20.5199  | 17.93014 | 17.1939  | 17.36203 | 15.393182 |
| ENSMUSG Miip      | 6.068962 | 6.10437  | 7.774306 | 7.672891 | 5.562946 | 6.804985  |
| ENSMUSG Wrap73    | 5.383723 | 5.282292 | 5.996017 | 6.140168 | 4.78402  | 6.108921  |
| ENSMUSG Lrrc47    | 14.40344 | 14.50056 | 16.39074 | 13.74957 | 12.61607 | 13.426334 |
| Mus_musc Mus_musc | 1.541324 | 2.372548 | 2.798298 | 2.239148 | 1.82205  | 1.136635  |
| Mus_musc Mus_musc | 0        | 0        | 0        | 0.441654 | 0.238411 | 1.013908  |
| Mus_musc Mus_musc | 0.234165 | 0.10553  | 0.095631 | 0.724291 | 0.481655 | 0.591031  |
| Mus_musc Mus_musc | 0        | 0.148044 | 0        | 0.288108 | 0.070746 | 0.158151  |
| Mus_musc Mus_musc | 1.234546 | 0.596728 | 0.205547 | 0.184601 | 0.28957  | 0         |
| ENSMUSG Gm49353   | 0        | 0        | 0        | 0        | 0        | 0         |
| ENSMUSG Elac2     | 8.22163  | 7.452656 | 7.450105 | 6.982051 | 7.083524 | 6.847767  |
| ENSMUSG 1700086D  | 0        | 0.02487  | 0.039604 | 0        | 0        | 0         |
| ENSMUSG Kcna7     | 0        | 0        | 0.084004 | 0.214641 | 0.06879  | 0.050309  |

|                   |          |          |          |          |          |           |
|-------------------|----------|----------|----------|----------|----------|-----------|
| ENSMUSG Fbxo8     | 7.865365 | 9.486205 | 8.980735 | 7.484628 | 8.723555 | 10.988958 |
| ENSMUSG Prkab2    | 3.220386 | 3.980692 | 3.835181 | 3.097321 | 2.702433 | 3.065362  |
| ENSMUSG Asb10     | 0        | 0.252922 | 0.181714 | 0.139243 | 0.132482 | 0.022004  |
| ENSMUSG Tom111    | 8.654986 | 9.609772 | 7.954584 | 6.433421 | 7.304619 | 6.893533  |
| ENSMUSG Itln1     | 0.061634 | 0.120499 | 0.395171 | 29.86253 | 20.11491 | 18.471815 |
| ENSMUSG Pgap3     | 3.980297 | 4.070116 | 2.890176 | 3.498839 | 3.954304 | 4.139851  |
| ENSMUSG Lrrc72    | 0        | 0        | 0        | 0        | 0        | 0         |
| ENSMUSG Cox11     | 4.696105 | 2.274114 | 2.557182 | 3.60959  | 4.428119 | 4.207997  |
| ENSMUSG Bzw2      | 9.093856 | 9.524192 | 9.038124 | 10.66367 | 10.24618 | 10.139316 |
| ENSMUSG Stxbp4    | 2.951259 | 3.315631 | 2.60976  | 2.341218 | 2.630504 | 2.529415  |
| ENSMUSG Hcrtr1    | 0.057512 | 0        | 0.040037 | 0.04131  | 0        | 0         |
| ENSMUSG Pef1      | 38.10394 | 37.56347 | 35.64243 | 27.49553 | 29.50958 | 32.063409 |
| ENSMUSG Zcchc17   | 12.93452 | 11.75107 | 11.75894 | 10.25006 | 11.73729 | 12.211655 |
| ENSMUSG Fabp3     | 8.576375 | 19.51089 | 9.589615 | 7.971996 | 4.527643 | 4.652359  |
| ENSMUSG Ptpn12    | 41.86002 | 40.4073  | 43.21472 | 28.93265 | 29.0527  | 27.257559 |
| ENSMUSG Tinagl1   | 82.93073 | 79.37935 | 109.6628 | 46.50095 | 55.37687 | 45.229922 |
| ENSMUSG Gnat3     | 0        | 0        | 0        | 0        | 0.196923 | 0.134249  |
| Mus_musc Mus_musc | 0        | 0.443847 | 0.112536 | 0.899785 | 0.908485 | 0.334231  |
| ENSMUSG Adam26b   | 0        | 0        | 0        | 0        | 0        | 0         |
| ENSMUSG Kik1      | 0.420607 | 0.708952 | 0.9952   | 1.999909 | 2.020935 | 2.650042  |
| ENSMUSG Dpp3      | 16.34396 | 16.83998 | 15.9124  | 21.13012 | 20.51405 | 21.600624 |
| ENSMUSG Gm10139   | 0        | 0        | 0        | 0        | 0        | 0         |
| ENSMUSG Herc6     | 4.154363 | 4.390205 | 7.586664 | 5.931003 | 4.401056 | 3.858619  |
| ENSMUSG Sspo      | 0.128593 | 0.14751  | 0.089666 | 0.148539 | 0.155998 | 0.138361  |
| ENSMUSG Cep41     | 2.215759 | 1.665804 | 1.519568 | 2.320575 | 2.044134 | 1.694973  |
| ENSMUSG Gm2016    | 0        | 0        | 0        | 0        | 0        | 0         |
| ENSMUSG Vmn1r65   | 0        | 0        | 0        | 0        | 0        | 0         |
| ENSMUSG Nhirc2    | 27.30756 | 26.99434 | 24.2106  | 16.93179 | 14.57346 | 16.074488 |
| ENSMUSG Nanog     | 0.099841 | 0.162963 | 0.065405 | 0.206442 | 0.214895 | 0.109379  |
| ENSMUSG Casp7     | 12.67716 | 12.51803 | 14.05376 | 14.40824 | 14.03442 | 15.437707 |
| ENSMUSG Dclre1a   | 3.177829 | 2.813159 | 2.775195 | 3.090097 | 3.046866 | 2.913785  |
| ENSMUSG Habp2     | 0.0171   | 0        | 0.031447 | 0        | 0.054451 | 0         |
| Mus_musc Mus_musc | 0        | 0        | 0.324221 | 0        | 0        | 0         |
| Mus_musc Mus_musc | 0        | 0        | 0.168936 | 0        | 0        | 0         |
| Mus_musc Mus_musc | 0        | 0.12313  | 0.185678 | 0.244787 | 0        | 0.268338  |
| Mus_musc Mus_musc | 0.085512 | 0        | 0.22921  | 0        | 0        | 0         |
| Mus_musc Mus_musc | 0        | 0        | 0        | 0        | 0        | 0         |
| Mus_musc Mus_musc | 0        | 0        | 0.289605 | 0        | 0        | 0         |
| ENSMUSG Dock8     | 14.43457 | 13.86474 | 13.97385 | 15.58766 | 16.70947 | 15.888845 |
| Mus_musc Mus_musc | 0        | 0        | 0        | 0        | 0        | 0         |
| ENSMUSG Rgs14     | 3.225226 | 2.695794 | 3.645679 | 5.63525  | 4.564573 | 4.870538  |
| ENSMUSG Cad       | 4.441373 | 3.824881 | 4.433569 | 5.445433 | 5.533845 | 5.260992  |
| ENSMUSG Atraid    | 50.63617 | 48.85577 | 49.6816  | 49.41536 | 45.19306 | 44.394228 |
| ENSMUSG Uba6      | 3.433371 | 3.777455 | 3.359023 | 3.939208 | 4.110199 | 4.122065  |
| ENSMUSG Rnase1    | 0.215326 | 0.255108 | 0.149182 | 0.438198 | 0.494208 | 0.84332   |
| ENSMUSG Cerk      | 11.07506 | 12.21161 | 11.2188  | 18.53804 | 18.87159 | 20.864174 |
| ENSMUSG Rnf126    | 15.17102 | 13.45606 | 14.37332 | 14.30802 | 13.70781 | 15.409499 |
| ENSMUSG Olfr372   | 0        | 0        | 0.010159 | 0.076903 | 0.027563 | 0.090481  |
| ENSMUSG Prss37    | 0        | 0        | 0        | 0        | 0        | 0         |
| ENSMUSG Immt      | 31.24855 | 34.72896 | 30.13912 | 29.63672 | 32.10551 | 31.469222 |
| ENSMUSG Cx3cr1    | 2.880844 | 1.624955 | 3.608923 | 4.580014 | 3.782945 | 3.275044  |
| ENSMUSG Tspan3    | 34.73624 | 31.95695 | 32.59695 | 29.52849 | 33.0953  | 31.031374 |
| ENSMUSG 1700024B( | 0        | 0        | 0        | 0        | 0        | 0         |
| ENSMUSG Pstpip1   | 3.593591 | 3.107514 | 6.031283 | 7.596726 | 6.03854  | 8.977275  |
| ENSMUSG Cyp11a1   | 0.200358 | 0.190077 | 0.55362  | 0.464564 | 0.362635 | 0.164833  |
| ENSMUSG Rcn2      | 35.45094 | 31.20611 | 32.98493 | 26.46194 | 29.68387 | 29.786203 |
| ENSMUSG Ccr7      | 7.453003 | 5.532559 | 6.265782 | 7.564072 | 6.046407 | 6.889338  |
| ENSMUSG Fgd3      | 3.112716 | 2.290084 | 3.261334 | 4.633555 | 4.235909 | 5.564832  |
| ENSMUSG Zfp51     | 3.313342 | 4.302555 | 3.790562 | 3.795026 | 3.45185  | 3.818787  |
| ENSMUSG Inpp4b    | 3.399354 | 3.814216 | 3.354516 | 5.677134 | 5.484184 | 5.603451  |
| ENSMUSG Tmem30a   | 77.69901 | 81.34357 | 81.22217 | 74.31205 | 71.36101 | 69.912709 |
| ENSMUSG Crp       | 0        | 0        | 0        | 0        | 0        | 0         |
| ENSMUSG Cep83     | 9.361165 | 9.972411 | 9.400979 | 11.00833 | 10.70649 | 10.736259 |
| ENSMUSG Gm9747    | 0        | 0        | 0        | 0        | 0        | 0         |

|                   |          |          |          |          |          |           |
|-------------------|----------|----------|----------|----------|----------|-----------|
| ENSMUSG Mpzl3     | 1.961686 | 1.91294  | 1.930004 | 2.207169 | 1.734592 | 2.102112  |
| ENSMUSG Kcnk16    | 0        | 0        | 0        | 0        | 0        | 0         |
| ENSMUSG Gm34302   | 0        | 0        | 0        | 0        | 0        | 0         |
| ENSMUSG 9230112D  | 0        | 0.027569 | 0        | 0        | 0        | 0         |
| ENSMUSG Bmpr1a    | 17.43812 | 19.33105 | 15.84377 | 14.02288 | 13.23835 | 13.433035 |
| ENSMUSG Sftpd     | 416.3058 | 455.6075 | 419.1102 | 683.6031 | 744.9909 | 810.55365 |
| ENSMUSG Glud1     | 55.9159  | 52.79085 | 54.10536 | 47.64356 | 48.10665 | 50.493699 |
| ENSMUSG Fam213a   | 12.30357 | 14.92195 | 11.52341 | 12.06035 | 11.10861 | 10.798034 |
| ENSMUSG Dydc2     | 0.885449 | 0.870961 | 0.722625 | 1.018994 | 1.379195 | 0.734722  |
| ENSMUSG Dydc1     | 0.33959  | 0.493014 | 0.341777 | 0.32757  | 0.482586 | 0.577551  |
| ENSMUSG Opn4      | 0        | 0.088347 | 0        | 0.018785 | 0        | 0.021528  |
| ENSMUSG Ldb3      | 1.160839 | 3.829208 | 1.203896 | 2.510701 | 1.773708 | 1.490155  |
| ENSMUSG Isoc2a    | 6.467142 | 6.556321 | 7.254467 | 6.319601 | 6.877084 | 5.968816  |
| ENSMUSG Olfr1278  | 0        | 0        | 0        | 0        | 0        | 0         |
| ENSMUSG AU021092  | 71.0872  | 71.01553 | 62.67361 | 64.91394 | 69.68421 | 81.067902 |
| ENSMUSG Jam2      | 23.73427 | 26.17294 | 27.21617 | 17.26881 | 19.81881 | 17.96162  |
| ENSMUSG Clec12a   | 2.281403 | 2.05573  | 4.010984 | 5.31184  | 5.209105 | 5.787152  |
| ENSMUSG Olfr368   | 0        | 0        | 0        | 0        | 0        | 0         |
| ENSMUSG Ms4a4d    | 11.91067 | 10.49401 | 10.33972 | 6.294547 | 5.44251  | 5.316246  |
| ENSMUSG Pin1rt1   | 0        | 0        | 0        | 0        | 0        | 0.054061  |
| ENSMUSG Olfr199   | 0        | 0        | 0        | 0        | 0        | 0         |
| ENSMUSG Ms4a4c    | 1.740812 | 2.246601 | 8.880315 | 4.732665 | 3.498804 | 2.861097  |
| ENSMUSG Qser1     | 6.13973  | 6.429242 | 5.142143 | 4.774659 | 4.897996 | 4.373949  |
| ENSMUSG Ms4a1     | 4.694611 | 3.551661 | 3.029451 | 11.58702 | 8.424083 | 10.0658   |
| ENSMUSG Prss48    | 0        | 0        | 0        | 0        | 0        | 0         |
| ENSMUSG Olfr982   | 0        | 0        | 0        | 0        | 0        | 0         |
| ENSMUSG Cd6       | 1.844811 | 1.159476 | 1.266462 | 3.13121  | 3.101994 | 3.477497  |
| ENSMUSG Fanca     | 0.464487 | 0.503886 | 0.578163 | 0.84043  | 0.705704 | 1.148845  |
| ENSMUSG Igdcc4    | 0.371991 | 0.535417 | 0.410777 | 0.685892 | 0.648248 | 0.612454  |
| ENSMUSG Arap1     | 22.69101 | 23.84582 | 25.48167 | 31.1474  | 30.17095 | 33.192447 |
| ENSMUSG Loxhd1    | 0.007955 | 0        | 0        | 0.04012  | 0        | 0.034522  |
| ENSMUSG Pcdhb1    | 0        | 0.050383 | 0.068802 | 0.040344 | 0.103878 | 0.053377  |
| ENSMUSG Znrd1     | 18.34663 | 19.9913  | 22.09876 | 17.15809 | 15.9081  | 18.189009 |
| ENSMUSG Ehhadh    | 3.719282 | 3.256257 | 2.937256 | 3.419262 | 3.589491 | 2.896408  |
| ENSMUSG Senp2     | 18.78415 | 19.63559 | 19.9273  | 17.39501 | 22.1623  | 19.606443 |
| ENSMUSG Tmprss15  | 0        | 0        | 0        | 0        | 0        | 0         |
| ENSMUSG Tmem41a   | 10.72584 | 11.62973 | 10.87943 | 9.789524 | 9.669168 | 8.282437  |
| ENSMUSG Tra2b     | 40.27791 | 36.81328 | 40.42701 | 32.77925 | 33.87228 | 35.401813 |
| ENSMUSG Klf12     | 3.033827 | 3.831353 | 2.417649 | 1.997333 | 2.219673 | 2.336985  |
| ENSMUSG C2cd6     | 0        | 0        | 0        | 0        | 0        | 0.02325   |
| ENSMUSG Pdcd5     | 17.19914 | 14.08272 | 20.00578 | 20.05603 | 21.69016 | 22.248665 |
| ENSMUSG Pglyrp1   | 8.306979 | 8.528588 | 9.302687 | 38.14088 | 35.22218 | 36.818935 |
| ENSMUSG Dmwd      | 14.25677 | 14.86807 | 15.26729 | 10.83249 | 10.58418 | 10.052929 |
| ENSMUSG Nova2     | 3.456661 | 2.734916 | 3.234739 | 1.901572 | 1.571598 | 1.387491  |
| ENSMUSG Spef1     | 6.849021 | 8.564617 | 6.989777 | 7.07776  | 8.138305 | 6.883871  |
| ENSMUSG Rpusd2    | 0.957251 | 1.316875 | 1.298673 | 1.050463 | 1.264209 | 1.363904  |
| ENSMUSG D5Ertd577 | 0        | 0        | 0        | 0        | 0        | 0         |
| ENSMUSG Knl1      | 0.139033 | 0.134803 | 0.178011 | 0.685104 | 0.743057 | 0.955739  |
| ENSMUSG 1700037H  | 8.659166 | 8.028634 | 9.083833 | 7.380119 | 7.796539 | 7.703907  |
| ENSMUSG Siglec1   | 2.341911 | 2.371197 | 2.220527 | 2.868445 | 2.716053 | 2.912632  |
| ENSMUSG Rad51     | 0.238472 | 0.380798 | 0.481249 | 1.024888 | 1.356207 | 1.388185  |
| ENSMUSG Gsto2     | 0.310509 | 0.461329 | 0.277163 | 0.157658 | 0.257859 | 0.458216  |
| ENSMUSG Brd1      | 27.80853 | 29.24368 | 26.51324 | 21.10331 | 22.83685 | 23.573027 |
| ENSMUSG Catsperd  | 0.205533 | 0.150145 | 0.057347 | 0.245814 | 0.129203 | 0.198665  |
| ENSMUSG Zmynd15   | 3.193811 | 2.905555 | 4.542529 | 7.79616  | 8.412496 | 8.326515  |
| ENSMUSG Ppara     | 1.696278 | 1.9624   | 1.270694 | 1.30622  | 1.057321 | 1.338192  |
| ENSMUSG Hlcs      | 4.907578 | 4.938098 | 4.307505 | 4.506311 | 4.695901 | 5.025675  |
| ENSMUSG 1700123O  | 11.92161 | 13.30253 | 14.54241 | 13.95888 | 13.63633 | 16.50557  |
| ENSMUSG Wnt7b     | 0.947179 | 1.33012  | 0.708424 | 1.406815 | 1.132669 | 1.537657  |
| ENSMUSG Snrpd2    | 18.77547 | 18.31781 | 19.09538 | 19.89029 | 19.16449 | 21.01111  |
| ENSMUSG Pcnt      | 16.46652 | 16.15281 | 13.34202 | 12.39454 | 12.72109 | 12.570757 |
| ENSMUSG Gm11009   | 0        | 0        | 0        | 0        | 0        | 0         |
| ENSMUSG Pirb      | 6.490139 | 5.764245 | 8.325926 | 10.47338 | 11.76752 | 13.051704 |
| ENSMUSG Slc25a15  | 2.494569 | 2.811398 | 2.480948 | 2.334049 | 2.739043 | 2.859451  |



|                   |          |          |          |          |          |           |
|-------------------|----------|----------|----------|----------|----------|-----------|
| ENSMUSG Erlin2    | 14.97191 | 14.64937 | 13.67904 | 15.29806 | 15.86714 | 15.68548  |
| ENSMUSG Tpte      | 0        | 0.024313 | 0        | 0        | 0        | 0         |
| ENSMUSG Rhbg      | 1.955008 | 1.961647 | 1.308008 | 1.196752 | 0.901175 | 1.859604  |
| ENSMUSG 2610507B: | 32.80537 | 34.99335 | 30.63191 | 32.9886  | 32.48581 | 33.329053 |
| ENSMUSG Tox2      | 25.40792 | 18.94605 | 20.21726 | 12.38478 | 15.03581 | 11.837634 |
| ENSMUSG Catip     | 3.176529 | 3.51031  | 2.417996 | 4.363304 | 3.761962 | 4.351973  |
| ENSMUSG Mgst2     | 4.721366 | 4.577408 | 4.055308 | 6.746266 | 4.465869 | 7.682387  |
| ENSMUSG Oit3      | 0.218689 | 0.212466 | 0.197476 | 0.908317 | 1.119501 | 1.506165  |
| ENSMUSG Crygb     | 0        | 0        | 0        | 0        | 0        | 0         |
| Mus_musc Mus_musc | 0.07418  | 0.128219 | 0.289047 | 0.536885 | 0.269921 | 0.528072  |
| ENSMUSG Keap1     | 22.66477 | 23.20012 | 27.86599 | 22.99381 | 22.75434 | 22.408678 |
| ENSMUSG Ap1m2     | 14.12671 | 13.14568 | 13.58478 | 11.01347 | 12.30482 | 13.399088 |
| Mus_musc Mus_musc | 0.098338 | 0.408943 | 0.335766 | 0.316246 | 0.681678 | 0.411431  |
| Mus_musc Mus_musc | 2.117305 | 2.439334 | 2.161654 | 2.021308 | 1.944519 | 2.486067  |
| Mus_musc Mus_musc | 0        | 0        | 0        | 0        | 0        | 0         |
| Mus_musc Mus_musc | 0        | 0        | 0.043939 | 0        | 0.202599 | 0         |
| Mus_musc Mus_musc | 0        | 0        | 0.130929 | 0.69266  | 0.544478 | 0.694357  |
| Mus_musc Mus_musc | 0        | 0        | 0        | 0        | 0.368472 | 0         |
| Mus_musc Mus_musc | 0.681302 | 0        | 0.345373 | 0.941505 | 0.421199 | 0.273206  |
| ENSMUSG Pnma3     | 0        | 0        | 0        | 0        | 0        | 0         |
| ENSMUSG Adam20    | 0        | 0        | 0        | 0        | 0        | 0         |
| ENSMUSG She       | 21.32651 | 19.27406 | 19.19039 | 11.99387 | 12.71792 | 12.885968 |
| Mus_musc Mus_musc | 0.918126 | 0.818508 | 0.587658 | 0.99742  | 1.439996 | 0.796773  |
| Mus_musc Mus_musc | 2.606953 | 2.825375 | 3.208228 | 1.34287  | 1.51652  | 1.769577  |
| Mus_musc Mus_musc | 0.959112 | 0.264027 | 0.36898  | 0.501466 | 0.371377 | 1.090016  |
| Mus_musc Mus_musc | 0.974045 | 0.900922 | 0.778116 | 0.773173 | 0.582007 | 0.511538  |
| Mus_musc Mus_musc | 0        | 0        | 0        | 0        | 0.336405 | 0         |
| Mus_musc Mus_musc | 0.153601 | 0.419964 | 0.259619 | 0.493854 | 0.852454 | 0.406103  |
| Mus_musc Mus_musc | 0        | 0        | 0        | 0        | 0        | 0         |
| ENSMUSG Rel1      | 12.51781 | 12.8662  | 12.62502 | 11.69254 | 11.61173 | 10.541847 |
| ENSMUSG Cxcr5     | 2.278601 | 1.38696  | 1.852274 | 3.812545 | 2.92114  | 3.762182  |
| ENSMUSG Kik9      | 0.191726 | 0        | 0        | 0.099977 | 0.039337 | 0.029824  |
| ENSMUSG Serpinb6d | 0        | 0        | 0        | 0        | 0        | 0         |
| ENSMUSG Tnrc6b    | 7.26544  | 7.518085 | 5.650326 | 6.554427 | 7.423228 | 6.639442  |
| ENSMUSG Angptl7   | 6.296656 | 3.01944  | 4.879647 | 2.535135 | 2.08538  | 2.978489  |
| ENSMUSG Cttnbip1  | 3.910969 | 3.72564  | 4.117518 | 3.433081 | 4.080142 | 4.373872  |
| ENSMUSG Cavin2    | 239.1797 | 230.2594 | 230.6794 | 131.9661 | 125.7946 | 122.29224 |
| ENSMUSG H6pd      | 51.03561 | 51.8037  | 48.12695 | 43.39984 | 49.51464 | 46.026089 |
| ENSMUSG Slc25a33  | 2.964161 | 2.889394 | 2.017699 | 2.514621 | 2.362989 | 1.867143  |
| ENSMUSG Kih7      | 13.13798 | 13.93305 | 12.55371 | 11.85082 | 12.81476 | 11.335987 |
| ENSMUSG Fam220a   | 18.11523 | 18.19959 | 20.23332 | 12.23713 | 12.01182 | 12.09524  |
| ENSMUSG Selenov   | 0        | 0        | 0        | 0        | 0        | 0         |
| Mus_musc Mus_musc | 0        | 0.186933 | 0.173095 | 0.473163 | 0.219847 | 0.162487  |
| ENSMUSG Ccdc66    | 3.43253  | 3.312638 | 3.741026 | 3.446602 | 3.386223 | 3.115202  |
| Mus_musc Mus_musc | 2.233089 | 2.537302 | 2.13912  | 1.763178 | 1.681035 | 1.683191  |
| ENSMUSG Mrps7     | 11.48368 | 12.18875 | 13.20019 | 11.72768 | 12.77105 | 13.660082 |
| ENSMUSG Gimap5    | 10.31232 | 10.29891 | 11.01351 | 11.54934 | 10.42472 | 10.19221  |
| Mus_musc Mus_musc | 0.396452 | 0.296999 | 0.241192 | 0.273604 | 0.226617 | 0         |
| Mus_musc Mus_musc | 0        | 0        | 0        | 0        | 0.167821 | 0         |
| ENSMUSG Secisbp2  | 7.494351 | 6.728095 | 7.38422  | 6.895058 | 6.830779 | 7.107353  |
| Mus_musc Mus_musc | 0        | 0.583579 | 0        | 0        | 0        | 0.106309  |
| Mus_musc Mus_musc | 0        | 0        | 0        | 0.209795 | 0        | 0         |
| Mus_musc Mus_musc | 0.033459 | 0        | 0        | 0.296595 | 0.172141 | 0.472654  |
| ENSMUSG Arhgap5   | 22.94758 | 26.19771 | 19.23513 | 17.97435 | 18.34168 | 13.898748 |
| Mus_musc Mus_musc | 0        | 0        | 0        | 1.103081 | 1.063175 | 1.01134   |
| Mus_musc Mus_musc | 0        | 0        | 0        | 0        | 0        | 0         |
| ENSMUSG Reln      | 0.621473 | 0.538031 | 0.448672 | 1.379047 | 1.687683 | 1.398589  |
| ENSMUSG Cyp3a41a  | 0        | 0        | 0        | 0        | 0        | 0         |
| ENSMUSG Mybph     | 0        | 0        | 0.053645 | 0.193737 | 0.157383 | 0.17504   |
| ENSMUSG Trrap     | 10.13461 | 9.905283 | 8.924082 | 10.21272 | 10.59195 | 10.505568 |
| ENSMUSG Bpifa2    | 0        | 0        | 0        | 0        | 0        | 0         |
| ENSMUSG Gm49486   | 0.039242 | 0        | 0.053055 | 0.126373 | 0.040222 | 0         |
| ENSMUSG Zp3       | 0        | 0        | 0        | 0        | 0        | 0         |
| ENSMUSG 1810010H: | 13.01233 | 18.48    | 12.64689 | 9.769334 | 8.809638 | 7.07285   |

|                   |          |          |          |          |          |           |
|-------------------|----------|----------|----------|----------|----------|-----------|
| ENSMUSG Gm4070    | 8.953481 | 7.746165 | 32.80598 | 23.38736 | 7.273191 | 9.294792  |
| ENSMUSG E030025P  | 0        | 0.094189 | 0.070051 | 0        | 0        | 0.12729   |
| ENSMUSG Gm10961   | 0        | 0        | 0        | 0.145013 | 0        | 0         |
| ENSMUSG Dtx2      | 8.061184 | 8.768252 | 7.550621 | 8.378186 | 8.709396 | 8.948615  |
| ENSMUSG Tmem242   | 25.29694 | 26.26005 | 22.56986 | 28.44333 | 24.34884 | 25.989799 |
| ENSMUSG Olfr1152  | 0        | 0        | 0        | 0        | 0        | 0         |
| ENSMUSG Ckb       | 27.48325 | 28.15311 | 27.89444 | 42.14696 | 39.32398 | 45.033978 |
| ENSMUSG Gosr1     | 14.63162 | 14.47708 | 14.51158 | 12.98354 | 12.63151 | 13.082548 |
| Mus_musc Mus_musc | 0.10193  | 0.290595 | 0        | 0.282176 | 0.380174 | 0.066853  |
| Mus_musc Mus_musc | 0        | 0        | 0.14254  | 0.052049 | 0.307959 | 0         |
| Mus_musc Mus_musc | 0        | 0.29768  | 0        | 0        | 0        | 0         |
| Mus_musc Mus_musc | 0.288896 | 0.118189 | 0.338718 | 0.190748 | 1.044894 | 0.161163  |
| ENSMUSG Ai429214  | 3.797943 | 3.151747 | 2.402482 | 2.518365 | 2.410459 | 1.997228  |
| ENSMUSG Tmem240   | 0.142749 | 0.192297 | 0.26025  | 0.295425 | 0.20382  | 0.178272  |
| ENSMUSG Ugp2      | 34.77017 | 33.9238  | 33.48895 | 32.47851 | 29.80799 | 30.285656 |
| ENSMUSG Sncap     | 1.784259 | 1.909635 | 1.39891  | 1.273603 | 1.235225 | 1.183232  |
| ENSMUSG Snx24     | 5.766364 | 7.085463 | 6.641797 | 7.246893 | 6.733784 | 7.375042  |
| ENSMUSG Psmg2     | 9.368279 | 9.366383 | 11.02943 | 9.261883 | 9.475474 | 8.949382  |
| ENSMUSG Prelid3a  | 0.110632 | 0.019226 | 0.202146 | 0.08207  | 0.132847 | 0.147723  |
| ENSMUSG Foxd2     | 0.40051  | 0.230035 | 0.265723 | 0.476127 | 0.215503 | 0.243308  |
| ENSMUSG 1700034E1 | 0        | 0.073061 | 0        | 0        | 0        | 0         |
| ENSMUSG Spire1    | 3.833101 | 4.604251 | 3.849518 | 4.094263 | 4.039537 | 4.115142  |
| ENSMUSG Ppic      | 70.58007 | 67.22131 | 70.01647 | 78.62273 | 77.52639 | 84.613388 |
| ENSMUSG Ptpn2     | 10.44705 | 10.30338 | 11.99876 | 13.55052 | 14.75266 | 12.103927 |
| Mus_musc Mus_musc | 0        | 0.213331 | 0.128454 | 0.182035 | 0.49039  | 0         |
| Mus_musc Mus_musc | 0.191854 | 0.284419 | 0.117094 | 0.746012 | 0.418205 | 0.594014  |
| Mus_musc Mus_musc | 33.22446 | 35.39043 | 39.35218 | 44.11363 | 45.11288 | 49.883587 |
| ENSMUSG Cyp2c54   | 0        | 0        | 0        | 0        | 0        | 0         |
| ENSMUSG Cnga1     | 0.169908 | 0.137239 | 0.064207 | 0.109912 | 0.245106 | 0.153791  |
| ENSMUSG Fdps      | 31.87247 | 34.33707 | 41.86872 | 53.03077 | 47.08024 | 68.143852 |
| ENSMUSG Kcnh7     | 0.190447 | 0.142742 | 0.155373 | 0.117669 | 0.096305 | 0.129721  |
| ENSMUSG Myl3      | 0.312449 | 3.209369 | 0.468406 | 1.366686 | 0.701142 | 0.402969  |
| ENSMUSG Cyp2c66   | 0        | 0        | 0        | 0        | 0        | 0         |
| ENSMUSG Nfil3     | 3.234772 | 3.323209 | 4.102664 | 6.50774  | 7.128864 | 8.918851  |
| ENSMUSG Sytl3     | 0.980248 | 0.397143 | 2.962047 | 0.804038 | 0.483344 | 1.06176   |
| ENSMUSG Ptpre     | 8.076305 | 7.153938 | 7.856943 | 14.40257 | 13.43954 | 13.86114  |
| ENSMUSG Pcdcd7    | 6.779781 | 5.510781 | 6.838117 | 4.595203 | 5.088192 | 5.277709  |
| ENSMUSG Fam78a    | 5.16858  | 3.425217 | 4.963164 | 4.966296 | 4.848864 | 5.647592  |
| ENSMUSG Cdkn2d    | 12.99742 | 10.79442 | 14.9807  | 10.80879 | 12.30933 | 11.347556 |
| Mus_musc Mus_musc | 0.138412 | 0        | 0.385268 | 0.415705 | 0.15454  | 0         |
| Mus_musc Mus_musc | 2.041892 | 1.543243 | 1.58951  | 0.803145 | 0.491409 | 0.758207  |
| Mus_musc Mus_musc | 0.407078 | 0.140325 | 0        | 0.245477 | 0        | 0         |
| Mus_musc Mus_musc | 0.536639 | 0.187839 | 0.156575 | 0.525888 | 0.193197 | 0.192315  |
| Mus_musc Mus_musc | 0.119511 | 0        | 0        | 0        | 0        | 0         |
| Mus_musc Mus_musc | 0.167124 | 0.301066 | 0.398006 | 0.107629 | 0        | 0         |
| Mus_musc Mus_musc | 0.406097 | 0.483257 | 0.147372 | 0.303251 | 0.345222 | 0.384339  |
| Mus_musc Mus_musc | 0        | 0        | 0.13745  | 0        | 0        | 0         |
| Mus_musc Mus_musc | 0        | 0        | 0        | 0        | 0.727273 | 0         |
| Mus_musc Mus_musc | 0.060976 | 0        | 0.081793 | 0.18399  | 0        | 0.127236  |
| ENSMUSG Klra7     | 0.16027  | 0.156164 | 1.709882 | 0.396211 | 0        | 0         |
| ENSMUSG Dgat2l6   | 0        | 0.025875 | 0        | 0        | 0        | 0         |
| ENSMUSG Krt77     | 0        | 0        | 0        | 0.016785 | 0        | 0         |
| ENSMUSG Klra3     | 3.310404 | 1.991061 | 8.274422 | 3.335045 | 1.745011 | 1.634475  |
| ENSMUSG Msantd1   | 0.104754 | 0.092486 | 0        | 0.112527 | 0.0631   | 0         |
| ENSMUSG Synpr     | 0        | 0.04934  | 0.016431 | 0        | 0.016659 | 0.033802  |
| ENSMUSG Pcdhb9    | 3.403092 | 3.18463  | 3.542516 | 2.617192 | 3.172792 | 3.284605  |
| ENSMUSG Islr2     | 0.018965 | 0.033673 | 0        | 0.012132 | 0.010673 | 0         |
| ENSMUSG Gsdmc2    | 0        | 0        | 0        | 0        | 0        | 0         |
| ENSMUSG Olfr485   | 0        | 0        | 0        | 0        | 0        | 0         |
| ENSMUSG Dync2li1  | 11.37437 | 11.45946 | 10.40929 | 13.64645 | 12.21539 | 10.714702 |
| ENSMUSG Gm27179   | 0.018658 | 0        | 0        | 0.036122 | 0.018564 | 0         |
| ENSMUSG Fat2      | 0.296931 | 0.350884 | 0.206112 | 0.422032 | 0.576616 | 0.571969  |
| Mus_musc Mus_musc | 4.709195 | 4.282769 | 3.935679 | 2.721071 | 3.768961 | 3.633512  |
| Mus_musc Mus_musc | 0        | 0        | 0.005988 | 0.206786 | 0        | 0         |

|                    |          |          |          |          |          |           |
|--------------------|----------|----------|----------|----------|----------|-----------|
| Mus_musc Mus_musc  | 1.885568 | 1.903479 | 2.024738 | 1.174947 | 1.360453 | 1.435223  |
| Mus_musc Mus_musc  | 0.058437 | 0.16312  | 0.03009  | 0.038289 | 0.017284 | 0.298885  |
| Mus_musc Mus_musc  | 6.852756 | 7.99127  | 6.21306  | 6.257643 | 5.456399 | 5.934206  |
| Mus_musc Mus_musc  | 0.157284 | 0        | 0        | 0.243513 | 0        | 0         |
| Mus_musc Mus_musc  | 0.325796 | 0.480335 | 0.508198 | 0.33423  | 0.486146 | 0.174122  |
| ENSMUSG 6030445D   | 0.238195 | 0.32496  | 0.414422 | 0.210773 | 0.085675 | 0.074686  |
| ENSMUSG Prss2      | 0.026552 | 0        | 0.116503 | 0        | 0        | 0         |
| ENSMUSG Fcrls      | 0.796962 | 1.259796 | 1.006854 | 4.113134 | 4.281357 | 5.709288  |
| ENSMUSG Adamtsl4   | 12.59578 | 14.06596 | 12.20301 | 10.67279 | 10.54407 | 8.756095  |
| ENSMUSG Cd5l       | 0.119413 | 0.740396 | 0.115998 | 0.134956 | 0.076933 | 0.32703   |
| ENSMUSG Pbx1       | 17.45412 | 19.09093 | 15.59346 | 15.06147 | 14.68493 | 14.209743 |
| ENSMUSG Olfr198    | 0        | 0        | 0        | 0        | 0        | 0         |
| ENSMUSG Nup188     | 8.292751 | 7.858092 | 7.759643 | 7.07899  | 7.468953 | 8.192142  |
| ENSMUSG Magi3      | 26.11977 | 29.56694 | 21.76336 | 16.64552 | 17.57097 | 17.202119 |
| ENSMUSG Gm5934     | 0        | 0        | 0        | 0        | 0        | 0         |
| ENSMUSG Gm20449    | 0.034417 | 0.020833 | 0.001401 | 0        | 0.058047 | 0.077852  |
| ENSMUSG Fgf12      | 0.091039 | 1.276108 | 0.091716 | 0.521273 | 0.111691 | 0.172035  |
| ENSMUSG V1ra8      | 0        | 0        | 0        | 0        | 0        | 0         |
| ENSMUSG Gnb2       | 138.7015 | 119.0942 | 132.4515 | 112.4995 | 118.3247 | 125.97377 |
| Mus_musc Mus_musc  | 0        | 0        | 0.31199  | 0        | 0.486637 | 0.376762  |
| Mus_musc Mus_musc  | 0.396474 | 0.816846 | 0.587556 | 0.605776 | 0.208994 | 0.781967  |
| ENSMUSG Ephb4      | 54.93933 | 53.56277 | 55.19168 | 34.51084 | 35.61546 | 33.34108  |
| Mus_musc Mus_musc  | 0        | 0        | 0        | 0        | 0        | 0.648369  |
| Mus_musc Mus_musc  | 0.253054 | 0.406332 | 0.247588 | 0.15526  | 0.141976 | 0.271316  |
| ENSMUSG 2210017I0  | 0        | 0        | 0        | 0        | 0        | 0         |
| ENSMUSG Gm31571    | 0        | 0        | 0        | 0        | 0        | 0         |
| ENSMUSG Nudt13     | 6.27121  | 5.522002 | 6.054784 | 4.553816 | 4.965522 | 3.788856  |
| ENSMUSG Rtraf      | 32.63097 | 32.54812 | 33.59441 | 39.34819 | 36.01379 | 37.346428 |
| ENSMUSG Nid2       | 3.472436 | 4.528381 | 4.736435 | 2.130573 | 2.574379 | 2.18965   |
| ENSMUSG Rgr        | 0        | 0        | 0        | 0        | 0        | 0         |
| ENSMUSG Cdhr1      | 0.021442 | 0.02757  | 0.008111 | 0.56491  | 0.304948 | 0.291416  |
| ENSMUSG Olfr396-ps | 0        | 0        | 0        | 0        | 0        | 0         |
| ENSMUSG Gm42742    | 8.63875  | 9.774195 | 10.09687 | 9.049669 | 14.90785 | 8.405291  |
| ENSMUSG D830030K   | 0        | 0        | 0        | 0        | 0.011235 | 0.029818  |
| ENSMUSG Dpyd       | 1.949084 | 1.814471 | 1.58889  | 0.947797 | 1.290132 | 1.163427  |
| ENSMUSG Tm6sf2     | 1.344113 | 0.930391 | 1.388641 | 1.081885 | 1.202009 | 1.394326  |
| ENSMUSG Lpp        | 7.65206  | 7.971777 | 6.274334 | 7.759705 | 8.470203 | 7.753365  |
| ENSMUSG Napsa      | 216.4638 | 198.7156 | 202.1505 | 182.3551 | 158.9075 | 188.84042 |
| ENSMUSG Vrk3       | 17.80232 | 16.78363 | 18.37328 | 18.81743 | 17.25537 | 20.247857 |
| ENSMUSG Mgat5      | 6.408636 | 6.405173 | 5.086403 | 6.356036 | 6.072691 | 6.924526  |
| ENSMUSG Odaph      | 0.39091  | 0.079997 | 0        | 0.356504 | 0.363987 | 0.18152   |
| ENSMUSG Gm21778    | 0        | 0        | 0        | 0        | 0        | 0         |
| ENSMUSG Olfml2b    | 3.089062 | 2.388079 | 2.557895 | 3.04472  | 3.309551 | 3.010478  |
| ENSMUSG Uqcrfs1    | 39.64042 | 33.30533 | 35.12149 | 37.45662 | 50.50103 | 51.258778 |
| ENSMUSG Chmp4b     | 83.16296 | 82.31731 | 94.1541  | 84.33467 | 87.04692 | 94.381714 |
| ENSMUSG Nucb2      | 29.31757 | 31.03156 | 29.72241 | 32.5848  | 31.26422 | 31.151281 |
| ENSMUSG Tmem247    | 0        | 0        | 0        | 0        | 0        | 0         |
| ENSMUSG Asp        | 0.156739 | 0.301646 | 0.135327 | 0.1744   | 0.212737 | 0.237127  |
| ENSMUSG Smg1       | 15.41066 | 15.62113 | 12.59945 | 14.73834 | 14.66093 | 14.849913 |
| ENSMUSG Atp8a1     | 36.46459 | 36.0885  | 38.35188 | 35.98487 | 37.64759 | 30.872906 |
| ENSMUSG Tmc5       | 0.137148 | 0.493762 | 0.059296 | 2.355861 | 2.524189 | 1.841798  |
| ENSMUSG Armc3      | 1.103898 | 1.453889 | 1.188527 | 1.664327 | 2.03465  | 1.848336  |
| ENSMUSG Coq7       | 11.44189 | 13.06378 | 13.34083 | 12.24979 | 13.80862 | 13.741724 |
| ENSMUSG Esyt3      | 3.25255  | 2.849334 | 2.111005 | 1.885104 | 1.54118  | 2.171574  |
| ENSMUSG Prss56     | 0        | 0        | 0        | 0        | 0        | 0         |
| ENSMUSG Chp1       | 50.39946 | 51.92308 | 50.58467 | 48.89842 | 52.4909  | 52.073411 |
| ENSMUSG Rnf168     | 8.03936  | 8.869002 | 7.888925 | 6.927459 | 6.420324 | 6.686496  |
| ENSMUSG Tctex1d2   | 6.409217 | 6.619823 | 5.79009  | 10.48625 | 6.997324 | 9.2747    |
| ENSMUSG Btbd35f16  | 0        | 0        | 0        | 0        | 0        | 0         |
| ENSMUSG Selenoh    | 22.59413 | 20.2548  | 21.04165 | 21.42343 | 21.42599 | 28.52335  |
| ENSMUSG Wfdc3      | 0.183717 | 0.500531 | 0.270597 | 0.8023   | 1.896538 | 1.617708  |
| ENSMUSG Acsf2      | 10.54794 | 10.49561 | 7.34476  | 9.002135 | 8.881323 | 7.968829  |
| ENSMUSG Ywhaq      | 99.44885 | 100.0332 | 99.20513 | 78.22838 | 82.72773 | 85.836506 |
| ENSMUSG Cep295nl   | 0.382401 | 0.690828 | 0.710398 | 0.330332 | 0.651102 | 0.392747  |

|                    |          |          |          |          |          |           |
|--------------------|----------|----------|----------|----------|----------|-----------|
| ENSMUSG Myo1h      | 0.524205 | 1.342744 | 0.894727 | 1.317011 | 1.100516 | 1.442626  |
| ENSMUSG Sox4       | 13.86598 | 12.37303 | 10.15266 | 15.13697 | 13.31905 | 13.600551 |
| ENSMUSG Ms4a4a     | 4.166494 | 2.435194 | 7.311036 | 10.18057 | 13.02563 | 10.201273 |
| ENSMUSG Oxt2b      | 0        | 0        | 0        | 0        | 0        | 0         |
| ENSMUSG Mog        | 0.077274 | 0        | 0.116892 | 0        | 0.059933 | 0.076868  |
| ENSMUSG Gm5797     | 0        | 0        | 0        | 0        | 0        | 0         |
| ENSMUSG Zscan2     | 4.251306 | 3.671603 | 3.547751 | 3.530459 | 3.096153 | 2.60959   |
| ENSMUSG Gm6588     | 0        | 0        | 0        | 0        | 0        | 0         |
| ENSMUSG Myo18b     | 0.084728 | 0.404204 | 0.114318 | 0.256443 | 0.172307 | 0.181183  |
| ENSMUSG Egfl8      | 2.914213 | 1.822156 | 3.348041 | 1.259808 | 0.994483 | 1.34145   |
| ENSMUSG Olfr196    | 0        | 0        | 0        | 0        | 0        | 0         |
| ENSMUSG Zfp960     | 2.030809 | 1.636149 | 1.952167 | 1.453992 | 1.39527  | 1.538957  |
| ENSMUSG Esp23      | 0        | 0        | 0        | 0        | 0        | 0         |
| ENSMUSG Vmn2r33    | 0        | 0        | 0        | 0        | 0        | 0         |
| ENSMUSG Nol7       | 34.37126 | 31.70569 | 33.86781 | 33.96045 | 29.28864 | 30.849177 |
| ENSMUSG Defa34     | 0        | 0        | 0        | 0        | 0        | 0         |
| ENSMUSG Apold1     | 0.876426 | 0.496238 | 0.833646 | 0.397744 | 0.47712  | 0.365997  |
| ENSMUSG Ms4a12     | 0        | 0        | 0        | 0        | 0        | 0         |
| ENSMUSG Trim43a    | 0        | 0.058655 | 0.122801 | 0.028549 | 0        | 0.027335  |
| ENSMUSG Gm8020     | 0        | 0        | 0        | 0        | 0        | 0         |
| ENSMUSG Gm3667     | 0.006869 | 0        | 0.049372 | 0        | 0.054562 | 0         |
| ENSMUSG Zfp78      | 1.020324 | 0.94211  | 0.948319 | 0.911299 | 0.810207 | 0.423961  |
| ENSMUSG Olfr387-ps | 0        | 0        | 0        | 0        | 0        | 0         |
| Mus_musc Mus_musc  | 0        | 0.275134 | 0        | 0.370294 | 0        | 0         |
| ENSMUSG Actr1b     | 34.53924 | 36.70982 | 37.12769 | 30.71985 | 30.75525 | 33.607671 |
| ENSMUSG Letmd1     | 7.075721 | 6.317711 | 7.262025 | 7.608891 | 7.477814 | 6.853924  |
| ENSMUSG Uvssa      | 2.78807  | 2.815447 | 2.294347 | 2.564185 | 2.027928 | 2.511343  |
| ENSMUSG 4930578C   | 2.624705 | 3.079023 | 2.572088 | 2.502584 | 2.386826 | 2.527801  |
| ENSMUSG Gm19684    | 0        | 0        | 0.062035 | 0.136336 | 0        | 0.098311  |
| ENSMUSG Zfp970     | 26.0643  | 29.37012 | 23.23276 | 14.84087 | 13.3421  | 14.008314 |
| ENSMUSG Gm14406    | 0.039666 | 0        | 0.04519  | 0        | 0        | 0         |
| ENSMUSG Gm26620    | 0.087051 | 0.163936 | 0.074243 | 0        | 0.137456 | 0.051687  |
| ENSMUSG 49305351   | 0        | 0        | 0        | 0.063304 | 0        | 0         |
| ENSMUSG Gm18336    | 0        | 0.020145 | 0        | 0        | 0        | 0         |
| ENSMUSG Foxo3      | 23.82497 | 27.42461 | 20.09019 | 18.05571 | 20.46205 | 16.168294 |
| ENSMUSG Lrrc61     | 5.380703 | 5.621964 | 4.44591  | 5.012728 | 3.809876 | 5.108528  |
| ENSMUSG Mcat       | 5.158039 | 5.613963 | 5.00076  | 4.972947 | 5.473831 | 5.40933   |
| ENSMUSG Prss50     | 0        | 0.07175  | 0.090618 | 0.106609 | 0.058726 | 0.086907  |
| ENSMUSG Rpl29      | 1.531288 | 1.657921 | 2.202942 | 1.885138 | 2.348029 | 1.707325  |
| ENSMUSG Efnb1      | 59.50006 | 66.13989 | 74.28285 | 38.25679 | 38.16563 | 34.207901 |
| ENSMUSG Stard8     | 33.19179 | 31.35195 | 31.30529 | 21.37203 | 21.57702 | 20.9785   |
| ENSMUSG Ophn1      | 2.24577  | 2.275567 | 2.295972 | 2.202869 | 2.239149 | 1.806387  |
| ENSMUSG Pgr15l     | 0        | 0        | 0        | 0        | 0        | 0         |
| ENSMUSG Gpr165     | 0        | 0        | 0        | 0        | 0        | 0         |
| ENSMUSG Ocm        | 0.132308 | 0        | 0        | 0.209592 | 0.091822 | 0.193704  |
| ENSMUSG Bbx        | 6.862462 | 7.330845 | 5.880328 | 5.948856 | 7.56092  | 6.303344  |
| ENSMUSG Eif2ak1    | 13.03073 | 12.65021 | 12.54648 | 12.95872 | 13.53574 | 13.323299 |
| ENSMUSG Aimp2      | 8.709789 | 7.290597 | 8.006763 | 7.766873 | 6.569586 | 8.763288  |
| ENSMUSG Erp29      | 12.49917 | 13.48018 | 13.42268 | 20.43365 | 19.51011 | 21.64094  |
| ENSMUSG Ccz1       | 20.55293 | 18.47382 | 20.17896 | 23.60687 | 22.77719 | 26.510578 |
| ENSMUSG Rpl6       | 289.3756 | 285.6543 | 280.9332 | 301.0266 | 313.3567 | 325.22879 |
| Mus_musc Mus_musc  | 0.485002 | 0.171761 | 0.412285 | 0.2044   | 0.277446 | 0         |
| Mus_musc Mus_musc  | 1.806504 | 1.103731 | 1.715616 | 1.269885 | 0.802842 | 0.641314  |
| Mus_musc Mus_musc  | 0.505416 | 0.908938 | 0.488892 | 0.408403 | 0.346237 | 0.318421  |
| Mus_musc Mus_musc  | 0        | 0        | 0        | 0        | 0        | 0         |
| Mus_musc Mus_musc  | 0.267306 | 0.185494 | 0.350822 | 0        | 0        | 0         |
| Mus_musc Mus_musc  | 0.204328 | 0        | 0        | 0        | 0.106207 | 0         |
| Mus_musc Mus_musc  | 0.151564 | 0.127447 | 0        | 0.26762  | 0.176801 | 0         |
| ENSMUSG Gm5096     | 0.014978 | 0        | 0        | 0        | 0        | 0         |
| Mus_musc Mus_musc  | 0        | 0.154309 | 0        | 0        | 0        | 0         |
| ENSMUSG Adhfe1     | 2.450697 | 3.084019 | 2.318359 | 2.354832 | 2.729478 | 1.742723  |
| ENSMUSG Mybl1      | 0.321126 | 0.330284 | 0.62473  | 0.51789  | 0.417246 | 0.588979  |
| ENSMUSG Sgk3       | 5.273018 | 5.616628 | 5.913426 | 5.901042 | 6.238877 | 5.745507  |
| ENSMUSG Cops5      | 22.78296 | 23.97933 | 24.4298  | 24.91607 | 23.16825 | 22.807246 |

|                   |          |          |          |          |          |           |
|-------------------|----------|----------|----------|----------|----------|-----------|
| ENSMUSG Ppp1r42   | 0.392753 | 0.704035 | 0.223654 | 0.584572 | 0.382909 | 0.836545  |
| ENSMUSG Evi5      | 14.46729 | 15.67254 | 12.41843 | 11.98496 | 13.23751 | 11.551229 |
| ENSMUSG Evi5l     | 5.898997 | 5.567284 | 5.186682 | 4.606711 | 4.702804 | 5.251616  |
| ENSMUSG Snapc2    | 9.440485 | 8.398202 | 7.499512 | 8.833356 | 9.044965 | 6.728134  |
| ENSMUSG Oscp1     | 0.983817 | 1.337686 | 0.922746 | 1.465703 | 1.41863  | 1.629991  |
| ENSMUSG Pbxip1    | 31.68982 | 28.86896 | 30.04529 | 34.34574 | 32.40451 | 34.550804 |
| ENSMUSG Zic4      | 0        | 0        | 0        | 0        | 0        | 0         |
| ENSMUSG Anapc10   | 3.094919 | 2.687147 | 3.102166 | 2.824327 | 2.999436 | 2.758942  |
| ENSMUSG Tmem177   | 2.152147 | 2.260601 | 2.124419 | 2.039286 | 1.849042 | 1.916011  |
| ENSMUSG Bphl      | 19.22798 | 23.7948  | 18.27489 | 25.93223 | 24.25948 | 25.435983 |
| ENSMUSG Lrrc4     | 0.137006 | 0.227729 | 0.204452 | 0.07158  | 0.11259  | 0.300965  |
| ENSMUSG H2afx     | 16.35751 | 14.54922 | 15.87609 | 19.56136 | 19.09118 | 22.731831 |
| ENSMUSG Thyn1     | 12.78766 | 13.30767 | 13.35936 | 11.71849 | 8.619782 | 12.227467 |
| ENSMUSG Sumo2     | 39.05904 | 51.29253 | 37.62791 | 47.78739 | 29.61761 | 37.806121 |
| ENSMUSG Myo1d     | 33.08366 | 31.195   | 29.65284 | 25.54796 | 25.43398 | 24.605627 |
| ENSMUSG Nt5c      | 35.67662 | 33.35088 | 37.77788 | 36.42001 | 35.26564 | 37.167534 |
| ENSMUSG Jpt1      | 26.40967 | 24.5553  | 36.63034 | 38.85059 | 43.27398 | 40.969521 |
| ENSMUSG Grin2c    | 2.158117 | 1.414948 | 2.319931 | 1.468241 | 1.127595 | 1.911342  |
| ENSMUSG Rab37     | 0.536597 | 0.404731 | 1.314606 | 2.510658 | 1.534384 | 2.476722  |
| ENSMUSG Slc9a3r1  | 35.49415 | 37.1944  | 35.03454 | 43.32941 | 39.84527 | 45.833672 |
| ENSMUSG Ccr3      | 0.855451 | 0.580688 | 0.692525 | 4.671153 | 5.142713 | 5.577151  |
| ENSMUSG Ccdc92b   | 0.149034 | 0.253712 | 0.22356  | 0.19754  | 0.185386 | 0.242544  |
| ENSMUSG B3galt2   | 0.037857 | 0.122527 | 0.03745  | 0.286992 | 0.102211 | 0.04914   |
| ENSMUSG Olfr23    | 0        | 0        | 0        | 0        | 0        | 0         |
| ENSMUSG Fhl5      | 0        | 0.02596  | 0.18293  | 0.599769 | 0.603761 | 0.564882  |
| ENSMUSG Clca1     | 0        | 0.548885 | 0        | 548.1143 | 479.7286 | 572.83148 |
| ENSMUSG Odf2l     | 3.7114   | 4.488054 | 3.982309 | 4.646202 | 3.688421 | 4.068805  |
| ENSMUSG Olfr390   | 0        | 0        | 0        | 0        | 0        | 0         |
| ENSMUSG Mrpl15    | 5.134831 | 4.839653 | 4.455862 | 6.064442 | 4.652742 | 4.817901  |
| ENSMUSG Ccnc      | 9.083032 | 8.293989 | 8.276047 | 7.9244   | 7.77224  | 6.844269  |
| ENSMUSG Foxe3     | 0        | 0        | 0        | 0        | 0        | 0         |
| ENSMUSG Dnah3     | 2.123355 | 2.842631 | 1.50976  | 3.046211 | 2.825468 | 2.976806  |
| ENSMUSG Fpr2      | 16.30648 | 14.07354 | 16.65625 | 8.079051 | 8.742849 | 6.565201  |
| ENSMUSG Bhlha15   | 0.871004 | 0.918569 | 0.659547 | 7.152741 | 7.136734 | 5.976195  |
| ENSMUSG Ostn      | 0        | 0        | 0        | 0        | 0        | 0         |
| ENSMUSG Sec23b    | 22.95407 | 23.54235 | 24.43478 | 23.59722 | 25.25907 | 24.466292 |
| ENSMUSG Olfr1141  | 0        | 0        | 0        | 0        | 0        | 0         |
| ENSMUSG Polr3f    | 6.587985 | 6.178048 | 5.726208 | 5.67924  | 5.322393 | 5.671329  |
| ENSMUSG Olfr1154  | 0        | 0        | 0        | 0        | 0        | 0         |
| ENSMUSG Kat14     | 11.26146 | 11.73202 | 11.15735 | 10.34104 | 10.59439 | 10.464008 |
| ENSMUSG Olfr1156  | 0        | 0        | 0        | 0        | 0        | 0         |
| ENSMUSG Snx5      | 33.50277 | 32.30931 | 34.14779 | 58.60817 | 61.22673 | 65.021953 |
| ENSMUSG Rrbp1     | 44.88898 | 42.95514 | 48.37261 | 55.75559 | 58.0142  | 59.803858 |
| ENSMUSG Olfr1160  | 0        | 0        | 0        | 0        | 0        | 0         |
| ENSMUSG Olfr73    | 0        | 0        | 0        | 0        | 0        | 0         |
| ENSMUSG Ppp1r3e   | 0.964423 | 0.661647 | 0.734777 | 0.904283 | 0.498787 | 1.023261  |
| ENSMUSG Zfp111    | 2.220504 | 2.357038 | 1.90256  | 1.772758 | 2.224761 | 1.839402  |
| ENSMUSG Spata31d1 | 0        | 0        | 0        | 0        | 0        | 0         |
| ENSMUSG Cep164    | 6.759108 | 7.324099 | 6.52133  | 7.110097 | 7.432508 | 7.211721  |
| ENSMUSG Krtap19-4 | 0        | 0        | 0        | 0        | 0        | 0         |
| ENSMUSG Pdzd7     | 0.488112 | 0.740415 | 0.75669  | 0.56341  | 0.57245  | 0.425742  |
| ENSMUSG Mup7      | 0        | 0        | 0        | 0        | 0        | 0         |
| ENSMUSG Spdye4c   | 0        | 0        | 0        | 0        | 0        | 0         |
| ENSMUSG Ms4a8a    | 7.355462 | 7.80518  | 9.770011 | 18.80534 | 26.84332 | 21.972641 |
| ENSMUSG Ms4a10    | 0        | 0        | 0        | 0        | 0        | 0         |
| ENSMUSG Tmem132   | 5.734617 | 5.802998 | 6.1562   | 7.787957 | 7.293782 | 8.162418  |
| ENSMUSG Papolb    | 0.031139 | 0.055987 | 0.068148 | 0.025041 | 0        | 0.049751  |
| ENSMUSG Zp1       | 0        | 0.076067 | 0        | 0.093355 | 0.032337 | 0         |
| ENSMUSG Prpf19    | 38.5763  | 38.03941 | 38.1346  | 34.94327 | 35.1831  | 36.22775  |
| ENSMUSG Zfp106    | 27.60549 | 30.26873 | 25.09899 | 26.2459  | 26.49134 | 24.982826 |
| ENSMUSG Mtch2     | 22.31104 | 23.12659 | 22.56916 | 21.99201 | 23.42353 | 24.584915 |
| ENSMUSG Slx4ip    | 1.267419 | 1.575126 | 1.108306 | 2.228327 | 1.960126 | 1.746371  |
| ENSMUSG Snap23    | 25.97689 | 27.09105 | 27.63415 | 27.57116 | 26.77797 | 28.475422 |
| ENSMUSG Lrrc57    | 14.25615 | 12.32235 | 12.86069 | 9.649253 | 9.175582 | 8.519455  |

|                   |          |          |          |          |          |           |
|-------------------|----------|----------|----------|----------|----------|-----------|
| ENSMUSG Haus2     | 9.188654 | 8.747535 | 7.644544 | 7.881084 | 7.430646 | 7.365761  |
| ENSMUSG Cdan1     | 4.10006  | 4.167206 | 4.588716 | 3.214878 | 3.311196 | 2.871959  |
| ENSMUSG Rce1      | 14.96107 | 13.72636 | 17.52049 | 15.01598 | 14.59662 | 14.160412 |
| ENSMUSG Aldh3b1   | 33.28035 | 37.89848 | 30.78426 | 37.406   | 35.0555  | 37.604252 |
| ENSMUSG Asah2     | 5.941986 | 5.94412  | 5.414563 | 6.360695 | 6.154653 | 6.277596  |
| ENSMUSG Rin1      | 1.346487 | 0.924602 | 0.941653 | 1.405767 | 0.902502 | 1.317523  |
| ENSMUSG Prkcq     | 3.871307 | 2.958599 | 4.138111 | 3.836539 | 3.628751 | 3.991542  |
| ENSMUSG Mastl     | 0.177402 | 0.254348 | 0.151468 | 0.306567 | 0.417979 | 0.575821  |
| ENSMUSG 4931423N  | 0        | 0        | 0        | 0        | 0        | 0         |
| ENSMUSG Yme1l1    | 19.46862 | 21.97611 | 18.15251 | 20.54371 | 21.34823 | 19.049847 |
| ENSMUSG Il2ra     | 0.751934 | 0.507264 | 0.489444 | 0.831374 | 0.981174 | 1.049887  |
| ENSMUSG Spopl     | 5.782669 | 6.001463 | 5.612345 | 5.302984 | 5.079348 | 5.252185  |
| ENSMUSG Pfkfb3    | 22.29491 | 22.9639  | 27.97633 | 18.67444 | 15.57326 | 14.237438 |
| ENSMUSG Rnf2      | 10.64198 | 11.15261 | 10.10566 | 9.628732 | 9.719386 | 9.168471  |
| ENSMUSG Rgl1      | 19.39377 | 19.44787 | 19.79375 | 22.12035 | 22.01182 | 25.021165 |
| ENSMUSG Fam129a   | 20.92249 | 18.79418 | 18.2771  | 14.23302 | 15.12242 | 14.690685 |
| ENSMUSG Ncf2      | 13.85869 | 12.49007 | 16.43155 | 29.46119 | 29.69211 | 33.612212 |
| ENSMUSG Gcdh      | 8.661954 | 9.460179 | 9.504022 | 8.965574 | 9.015465 | 9.492425  |
| ENSMUSG Farsa     | 14.67718 | 14.32925 | 15.79562 | 15.31127 | 14.08601 | 15.777114 |
| ENSMUSG Coq8a     | 3.492503 | 4.787254 | 2.832522 | 4.248441 | 3.588421 | 3.413172  |
| ENSMUSG Mill2     | 7.656225 | 6.797731 | 8.046804 | 4.586323 | 4.676329 | 3.254001  |
| ENSMUSG Sun3      | 0        | 0        | 0        | 0        | 0        | 0         |
| ENSMUSG Defb4     | 0        | 0        | 0        | 0        | 0        | 0         |
| ENSMUSG Alkbh3    | 10.57345 | 9.336079 | 9.138503 | 8.01222  | 8.125191 | 9.714149  |
| ENSMUSG Rbfa      | 10.79906 | 9.962155 | 11.83228 | 11.98393 | 13.00438 | 14.43334  |
| ENSMUSG Dnajb11   | 37.48744 | 38.12213 | 44.61383 | 66.27456 | 72.98329 | 67.043917 |
| ENSMUSG Tbccd1    | 5.064668 | 5.452313 | 4.904897 | 5.464413 | 5.72922  | 6.302541  |
| Mus_musc Mus_musc | 0.279901 | 0.124957 | 0        | 0        | 0.086041 | 0.137539  |
| Mus_musc Mus_musc | 93.19034 | 17.73773 | 41.95955 | 38.61651 | 23.70151 | 140.79578 |
| Mus_musc Mus_musc | 0.125015 | 0.154309 | 0        | 0        | 0        | 0         |
| Mus_musc Mus_musc | 0        | 0        | 0        | 0.174016 | 0        | 0         |
| Mus_musc Mus_musc | 0        | 0.181303 | 0        | 0        | 0        | 0         |
| ENSMUSG Cdkal1    | 3.784057 | 3.635831 | 3.765267 | 3.992339 | 4.08709  | 3.786395  |
| Mus_musc Mus_musc | 0        | 0.197048 | 0        | 1.029543 | 0        | 0.209303  |
| Mus_musc Mus_musc | 0        | 0        | 0        | 0.294671 | 0.338932 | 0.153402  |
| Mus_musc Mus_musc | 0.133405 | 0.151723 | 0.20631  | 0.457316 | 0.166709 | 0.282682  |
| ENSMUSG Vmn1r198  | 0        | 0        | 0        | 0        | 0        | 0         |
| Mus_musc Mus_musc | 0.277418 | 0.085651 | 0        | 0        | 0        | 0.026383  |
| ENSMUSG Cdk12     | 9.269356 | 9.670389 | 8.550795 | 8.937938 | 9.045384 | 8.572738  |
| Mus_musc Mus_musc | 0.088408 | 0.040066 | 0        | 0        | 0.084503 | 0         |
| Mus_musc Mus_musc | 0.135629 | 0        | 0.13878  | 0        | 0        | 0.090919  |
| Mus_musc Mus_musc | 0.064659 | 0        | 0        | 0        | 0.062354 | 0.095369  |
| Mus_musc Mus_musc | 0.486096 | 0.165232 | 0.153744 | 0.206918 | 0.535267 | 0         |
| Mus_musc Mus_musc | 0        | 0        | 0        | 0.27801  | 0        | 0         |
| Mus_musc Mus_musc | 0.167334 | 0.537383 | 0.235439 | 0.186353 | 0.177985 | 0.149823  |
| ENSMUSG 6430628N  | 0        | 0        | 0        | 0        | 0        | 0         |
| ENSMUSG Nsf       | 14.72329 | 13.48745 | 13.62805 | 12.78287 | 15.26886 | 15.455958 |
| ENSMUSG Zmpste24  | 28.29815 | 28.15517 | 25.32857 | 22.59818 | 23.62193 | 23.27501  |
| ENSMUSG Hsd1l     | 15.21428 | 13.79416 | 12.88194 | 12.70958 | 13.72124 | 12.724842 |
| ENSMUSG Gabpa     | 15.22423 | 14.20105 | 13.19745 | 12.43973 | 12.88062 | 10.847796 |
| ENSMUSG Ifit1     | 6.248541 | 6.391808 | 9.955721 | 5.444036 | 5.376543 | 5.685609  |
| ENSMUSG Uroc1     | 0        | 0        | 0        | 0.015029 | 0        | 0.071295  |
| ENSMUSG Eda2r     | 0.263371 | 0.389345 | 0.414875 | 0.415156 | 0.4559   | 0.498063  |
| ENSMUSG Slc24a1   | 0        | 0.024539 | 0.023625 | 0.031278 | 0        | 0.031817  |
| ENSMUSG Polr3b    | 7.557087 | 7.407393 | 6.823392 | 6.745437 | 6.623432 | 7.208494  |
| ENSMUSG Gulo      | 0        | 0        | 0.039715 | 0        | 0        | 0.020429  |
| ENSMUSG Mc1r      | 0        | 0        | 0        | 0        | 0        | 0         |
| ENSMUSG Exoc8     | 7.771735 | 8.405476 | 7.806812 | 7.327224 | 7.174865 | 7.128431  |
| Mus_musc Mus_musc | 0        | 0.273905 | 0        | 0        | 0        | 0         |
| ENSMUSG Met       | 14.78475 | 19.59251 | 11.91872 | 18.38745 | 18.66466 | 22.068011 |
| Mus_musc Mus_musc | 2.258916 | 2.643693 | 3.047995 | 2.353513 | 1.780056 | 1.777446  |
| Mus_musc Mus_musc | 0.314475 | 0.061438 | 0.180498 | 0.107883 | 0.261154 | 0.105823  |
| Mus_musc Mus_musc | 8.812527 | 11.88079 | 8.708426 | 12.20598 | 11.26513 | 12.439499 |
| Mus_musc Mus_musc | 0        | 0        | 0.054914 | 0.143393 | 0.192171 | 0         |

|                    |          |          |          |          |          |           |
|--------------------|----------|----------|----------|----------|----------|-----------|
| ENSMUSG Slc16a12   | 3.459992 | 3.031562 | 2.627956 | 3.213929 | 3.191697 | 3.445638  |
| Mus_musc Mus_musc  | 0.161494 | 0.346504 | 0.219882 | 0.240735 | 0.335502 | 0.207106  |
| Mus_musc Mus_musc  | 0.564666 | 0.548398 | 0.372119 | 0.445764 | 0.138281 | 0.362657  |
| Mus_musc Mus_musc  | 0        | 0.217849 | 0.173453 | 0.113529 | 0        | 0         |
| Mus_musc Mus_musc  | 3.297973 | 3.504658 | 4.43132  | 2.679764 | 3.380104 | 2.411809  |
| Mus_musc Mus_musc  | 0.158966 | 0.100732 | 0.218753 | 0.681167 | 0.227316 | 0.312963  |
| Mus_musc Mus_musc  | 0        | 0.019699 | 0        | 0.245373 | 0        | 0.08764   |
| Mus_musc Mus_musc  | 0.435679 | 0.396292 | 0.370102 | 5.937757 | 4.569294 | 5.402595  |
| ENSMUSG Sin3a      | 16.0476  | 15.92853 | 14.58813 | 13.83727 | 13.22552 | 14.046638 |
| ENSMUSG Zp3r       | 0        | 0        | 0        | 0        | 0        | 0         |
| Mus_musc Mus_musc  | 0.188031 | 0        | 0        | 0        | 0.185418 | 0         |
| Mus_musc Mus_musc  | 0        | 0.196669 | 0        | 0.076641 | 0        | 0.107234  |
| Mus_musc Mus_musc  | 0.192412 | 0        | 0.163595 | 0.305759 | 0.140718 | 0.110328  |
| ENSMUSG Adprhl2    | 12.65248 | 13.15053 | 12.62949 | 12.78561 | 11.09865 | 12.993007 |
| ENSMUSG Ghdc       | 6.989819 | 6.549775 | 6.716421 | 6.995861 | 5.01112  | 6.622921  |
| ENSMUSG Coa7       | 1.923778 | 2.553006 | 2.397447 | 2.175108 | 1.578344 | 2.074354  |
| ENSMUSG Slc12a5    | 1.669588 | 1.47371  | 1.595438 | 1.27778  | 1.261057 | 1.522926  |
| Mus_musc Mus_musc  | 0.565808 | 0.526018 | 0.124502 | 0.184439 | 0.571495 | 0         |
| Mus_musc Mus_musc  | 0        | 0.114344 | 0.337872 | 0.328537 | 0        | 0.232773  |
| Mus_musc Mus_musc  | 0        | 0        | 0        | 0        | 0.373385 | 0         |
| ENSMUSG Uqcrcq     | 24.9813  | 30.24985 | 29.72345 | 42.49461 | 38.17819 | 40.307104 |
| ENSMUSG Olfr821    | 0        | 0        | 0        | 0        | 0        | 0         |
| Mus_musc Mus_musc  | 0        | 0        | 0        | 0        | 0        | 0.395261  |
| ENSMUSG Olfr649    | 0        | 0        | 0        | 0        | 0        | 0         |
| Mus_musc Mus_musc  | 0        | 0.186633 | 0        | 0        | 0        | 0         |
| ENSMUSG Ager       | 1434.419 | 1460.628 | 1499.263 | 962.5648 | 960.3891 | 936.8104  |
| ENSMUSG Hbp1       | 39.7821  | 40.69842 | 35.06019 | 38.15088 | 39.62148 | 35.376691 |
| ENSMUSG Prkar2b    | 9.958402 | 10.28065 | 7.7124   | 5.538639 | 6.001949 | 5.494099  |
| ENSMUSG Apoc2      | 0.524164 | 0        | 1.115889 | 3.316787 | 1.929605 | 2.336049  |
| ENSMUSG Elk3       | 33.30043 | 29.57069 | 31.13354 | 25.40037 | 24.68092 | 24.940481 |
| ENSMUSG Elmo1      | 13.28245 | 15.21996 | 13.05678 | 10.48849 | 13.72082 | 10.215596 |
| ENSMUSG Ccdc8      | 3.129928 | 3.248067 | 3.16988  | 2.01376  | 1.868903 | 1.94964   |
| ENSMUSG Iqsec2     | 8.140855 | 9.121162 | 8.981411 | 6.415393 | 6.550324 | 6.571382  |
| ENSMUSG Pde9a      | 29.06401 | 25.11413 | 30.62865 | 18.41215 | 18.06392 | 19.286528 |
| ENSMUSG Gm2a       | 17.4102  | 17.62609 | 18.71642 | 29.99538 | 27.32543 | 30.829929 |
| ENSMUSG Vmn1r227   | 0        | 0        | 0        | 0        | 0        | 0         |
| Mus_musc Mus_musc  | 0.155459 | 0        | 0        | 0.285164 | 0.140453 | 0.037507  |
| ENSMUSG Btbd35f4   | 0        | 0        | 0        | 0        | 0        | 0         |
| ENSMUSG 1700008O   | 0        | 0        | 0        | 0.225477 | 0        | 0.076657  |
| ENSMUSG Hist1h2bn  | 2.845149 | 3.16192  | 1.654555 | 3.173089 | 2.988789 | 2.527121  |
| ENSMUSG Zfp474     | 2.258286 | 2.490837 | 1.436294 | 3.212839 | 3.319186 | 3.258259  |
| Mus_musc Mus_musc  | 7.480384 | 8.035352 | 7.466042 | 3.387408 | 3.213568 | 3.452392  |
| ENSMUSG Tex37      | 0        | 0        | 0        | 0        | 0        | 0         |
| ENSMUSG Klhdc1     | 3.385456 | 3.519323 | 4.047882 | 3.121754 | 3.161915 | 2.835871  |
| ENSMUSG Olfr875    | 0        | 0.184126 | 0        | 0        | 0        | 0         |
| ENSMUSG Adra2b     | 0.087328 | 0.154864 | 0.040662 | 0.026527 | 0.142913 | 0.014039  |
| ENSMUSG Capn11     | 0        | 0        | 0        | 0        | 0        | 0         |
| ENSMUSG Gda        | 6.724756 | 7.530977 | 6.105766 | 11.03124 | 11.26096 | 11.88529  |
| ENSMUSG Dthd1      | 0        | 0        | 0        | 0        | 0.046154 | 0         |
| ENSMUSG Tcf19      | 3.640782 | 3.543454 | 3.302402 | 5.071591 | 5.972574 | 7.389391  |
| ENSMUSG Olfr1452-Ꞥ | 0        | 0        | 0        | 0        | 0        | 0         |
| ENSMUSG Olfr1506   | 0        | 0        | 0        | 0        | 0        | 0         |
| ENSMUSG Gm5788     | 0        | 0        | 0        | 0        | 0        | 0         |
| ENSMUSG Atp9a      | 47.67661 | 43.19668 | 45.46131 | 32.39656 | 32.40717 | 34.142158 |
| ENSMUSG Sall4      | 0        | 0        | 0        | 0        | 0        | 0         |
| Mus_musc Mus_musc  | 0        | 0        | 0        | 0        | 0        | 0         |
| Mus_musc Mus_musc  | 0.081395 | 0.216117 | 0.200579 | 0.54746  | 0.468382 | 0.793404  |
| Mus_musc Mus_musc  | 0        | 0.154309 | 0        | 0        | 0        | 0         |
| Mus_musc Mus_musc  | 0.241327 | 0.137601 | 0.128563 | 0.123194 | 0.200962 | 0.073864  |
| Mus_musc Mus_musc  | 0        | 0        | 0        | 0.155183 | 0        | 0.184186  |
| Mus_musc Mus_musc  | 0.096334 | 0.092163 | 0.14564  | 0.312911 | 0.272622 | 0.254665  |
| Mus_musc Mus_musc  | 0        | 0        | 0.19539  | 0.079589 | 0.230399 | 0         |
| Mus_musc Mus_musc  | 0        | 0        | 0        | 0        | 0.083377 | 0         |
| Mus_musc Mus_musc  | 0.814595 | 0.505827 | 0.696774 | 0.099644 | 0.175072 | 0.531466  |

|          |           |          |          |          |          |          |           |
|----------|-----------|----------|----------|----------|----------|----------|-----------|
| Mus_musc | Mus_musc  | 0        | 0        | 0.154799 | 0.051331 | 0.248252 | 0         |
| Mus_musc | Mus_musc  | 0.517078 | 0.056758 | 0.202084 | 1.693721 | 1.76193  | 1.29942   |
| ENSMUSG  | lqsec3    | 0        | 0        | 0        | 0.007015 | 0        | 0.018952  |
| ENSMUSG  | C1qtnf4   | 0.775447 | 0.651807 | 0.811548 | 0.913652 | 0.8899   | 0.498017  |
| ENSMUSG  | lqcc      | 5.719483 | 5.824035 | 4.807787 | 5.616511 | 5.953841 | 5.691159  |
| ENSMUSG  | Nusap1    | 1.07742  | 1.015106 | 1.08676  | 2.197153 | 3.10383  | 3.027606  |
| ENSMUSG  | Car10     | 0        | 0        | 0        | 0        | 0        | 0         |
| ENSMUSG  | Socs6     | 6.37396  | 5.626849 | 5.656282 | 6.897762 | 8.053251 | 6.86721   |
| ENSMUSG  | Nanos3    | 0        | 0.066897 | 0        | 0        | 0        | 0.075441  |
| ENSMUSG  | Hist2h2bb | 5.239711 | 5.852007 | 4.342236 | 5.154257 | 4.868701 | 2.900087  |
| ENSMUSG  | Endog     | 6.470072 | 5.447685 | 5.226936 | 5.98299  | 5.681177 | 6.063927  |
| ENSMUSG  | Zdhhc12   | 8.557957 | 7.735536 | 8.066153 | 8.448343 | 7.993169 | 9.084369  |
| ENSMUSG  | Sbk3      | 0.533431 | 2.109397 | 0.397632 | 0.474171 | 0.260296 | 0.267323  |
| ENSMUSG  | Igkv4-54  | 0.206312 | 0        | 0        | 2.054659 | 10.35074 | 7.814421  |
| ENSMUSG  | Vmn1r61   | 0        | 0        | 0        | 0        | 0        | 0         |
| ENSMUSG  | Rfpl4b    | 0        | 0        | 0        | 0        | 0        | 0         |
| ENSMUSG  | Gm4301    | 0        | 0        | 0        | 0        | 0        | 0         |
| ENSMUSG  | A2ml1     | 0.350311 | 0.599719 | 0.202641 | 1.553951 | 1.344881 | 1.123359  |
| ENSMUSG  | Rnase2a   | 0.14334  | 0.127026 | 0        | 201.8191 | 266.7636 | 243.48409 |
| ENSMUSG  | Fam185a   | 1.684394 | 1.975816 | 1.74972  | 1.485518 | 1.930819 | 1.93067   |
| ENSMUSG  | Ccdc36    | 0.032922 | 0.02077  | 0.035073 | 0.034201 | 0        | 0.032057  |
| ENSMUSG  | Gm527     | 1.683314 | 2.325253 | 2.411072 | 1.790701 | 2.494181 | 1.976353  |
| ENSMUSG  | Olf1r684  | 0        | 0        | 0        | 0        | 0        | 0         |
| ENSMUSG  | Ndfip2    | 27.96009 | 26.12382 | 23.69362 | 22.56294 | 24.12757 | 24.630842 |
| ENSMUSG  | Olf1r212  | 0        | 0        | 0        | 0        | 0        | 0         |
| ENSMUSG  | Tmem139   | 2.352606 | 3.456824 | 1.796438 | 3.196769 | 2.709725 | 2.795552  |
| ENSMUSG  | Gm45618   | 0        | 0        | 0        | 0        | 0        | 0         |
| ENSMUSG  | Pfn5      | 0        | 0        | 0        | 0        | 0        | 0         |
| ENSMUSG  | Gm45692   | 0        | 0        | 0        | 0        | 0        | 0         |
| ENSMUSG  | Slc41a1   | 10.48643 | 10.3155  | 9.433253 | 9.613655 | 9.457694 | 9.804007  |
| ENSMUSG  | Noto      | 0.082044 | 0        | 0        | 0        | 0        | 0.042885  |
| ENSMUSG  | Tcea3     | 7.772063 | 8.295875 | 5.939301 | 6.432763 | 5.992511 | 5.925941  |
| ENSMUSG  | Rbbp8nl   | 0.358711 | 0.304959 | 0.160413 | 0.5736   | 0.329268 | 0.430562  |
| ENSMUSG  | Bloc1s5   | 2.64282  | 2.833966 | 2.505377 | 2.304988 | 2.820656 | 2.632628  |
| ENSMUSG  | Tspyl5    | 0.411794 | 0.425024 | 0.33248  | 0.379451 | 0.458025 | 0.605702  |
| ENSMUSG  | Cfap157   | 2.086901 | 3.028746 | 1.765051 | 3.593719 | 3.130245 | 2.841138  |
| ENSMUSG  | Camk1g    | 0.042724 | 0.053999 | 0.003079 | 0.111429 | 0.051342 | 0.034763  |
| ENSMUSG  | Hmgn3     | 6.102219 | 8.943635 | 7.098579 | 10.24415 | 10.02171 | 10.685735 |
| ENSMUSG  | Tnrc6a    | 11.06416 | 11.90154 | 10.30851 | 11.0973  | 10.67725 | 10.726829 |
| ENSMUSG  | Taar7f    | 0        | 0        | 0        | 0        | 0        | 0         |
| ENSMUSG  | Zfp141    | 2.917244 | 2.791689 | 2.466642 | 2.28554  | 2.415159 | 2.207599  |
| ENSMUSG  | Gpank1    | 10.19336 | 10.24978 | 12.21211 | 9.304174 | 10.52944 | 10.892178 |
| ENSMUSG  | Olf1r115  | 0        | 0        | 0        | 0        | 0        | 0         |
| ENSMUSG  | Krt39     | 0        | 0        | 0        | 0        | 0        | 0         |
| ENSMUSG  | Slc22a8   | 0        | 0        | 0        | 0        | 0        | 0         |
| ENSMUSG  | Slc35b3   | 8.370922 | 7.166498 | 7.535386 | 7.227614 | 8.83579  | 8.077079  |
| ENSMUSG  | Gm20920   | 0        | 0        | 0        | 0        | 0        | 0         |
| ENSMUSG  | Gm4131    | 0        | 0        | 0        | 0.178146 | 0.210177 | 0.255879  |
| ENSMUSG  | Ankrd24   | 2.726209 | 2.179899 | 2.742035 | 2.574285 | 2.219137 | 2.911363  |
| ENSMUSG  | Ap1s3     | 4.515108 | 3.840831 | 3.924862 | 5.014074 | 4.407124 | 4.704594  |
| ENSMUSG  | Tarbp2    | 10.44008 | 10.67543 | 13.04247 | 10.99574 | 12.64221 | 12.565724 |
| ENSMUSG  | Casp4     | 5.219066 | 4.470441 | 5.491229 | 9.593788 | 6.806229 | 7.496332  |
| ENSMUSG  | Ttc7b     | 13.99707 | 12.1799  | 15.44705 | 10.85386 | 11.01475 | 11.463645 |
| ENSMUSG  | Acsm1     | 1.443317 | 2.775875 | 1.06008  | 1.82789  | 0.97243  | 1.614324  |
| ENSMUSG  | Retnla    | 8.272913 | 22.3013  | 11.37019 | 6182.202 | 7878.735 | 7904.2568 |
| ENSMUSG  | Psm3      | 44.08356 | 42.46915 | 47.76118 | 43.25333 | 41.66306 | 44.007517 |
| ENSMUSG  | Sap18b    | 16.28462 | 17.41211 | 15.20607 | 16.56054 | 17.46437 | 12.230526 |
| ENSMUSG  | Gm49510   | 0        | 0        | 0        | 0.981052 | 0.417872 | 0.46211   |
| ENSMUSG  | Zhx2      | 9.258615 | 8.931531 | 8.850965 | 6.357395 | 6.746906 | 6.448455  |
| ENSMUSG  | Vmn1r22   | 0        | 0        | 0        | 0        | 0        | 0         |
| ENSMUSG  | Gm17387   | 0        | 0        | 0        | 0        | 0        | 0         |
| ENSMUSG  | Adgrg3    | 2.501549 | 2.131131 | 2.562158 | 1.99321  | 1.479672 | 1.655567  |
| ENSMUSG  | Wtap      | 25.31405 | 24.81407 | 26.23855 | 23.80093 | 23.00327 | 23.892842 |
| ENSMUSG  | Irak2     | 11.23023 | 10.302   | 11.56881 | 10.93514 | 9.820814 | 10.035359 |



|                  |          |          |          |          |          |           |
|------------------|----------|----------|----------|----------|----------|-----------|
| ENSMUSG Phrf1    | 15.13445 | 13.62508 | 13.41575 | 11.68842 | 11.79066 | 12.552281 |
| ENSMUSG Mcl1     | 111.0625 | 112.3552 | 118.2764 | 86.9306  | 97.49327 | 96.22802  |
| ENSMUSG Nfe2l1   | 72.12966 | 71.89816 | 76.48998 | 61.72419 | 61.53311 | 61.01066  |
| ENSMUSG Rassf7   | 23.02411 | 26.02287 | 25.26016 | 19.40132 | 19.2887  | 18.029541 |
| ENSMUSG Ensa     | 29.10911 | 29.38297 | 27.91449 | 27.19758 | 26.68249 | 26.122752 |
| ENSMUSG Gm8653   | 0        | 0        | 0        | 0        | 0        | 0         |
| ENSMUSG Dlgap4   | 24.5724  | 22.26088 | 25.46403 | 22.00543 | 20.63766 | 20.167631 |
| ENSMUSG Urb2     | 3.607194 | 3.165375 | 3.397964 | 3.077501 | 3.099801 | 3.09376   |
| ENSMUSG Abcb10   | 5.603235 | 5.788088 | 5.218504 | 4.785851 | 5.308332 | 5.05616   |
| ENSMUSG Acta1    | 0.418721 | 2.118656 | 0.675245 | 0.886575 | 0.659881 | 2.009031  |
| ENSMUSG Dbndd1   | 1.217372 | 1.478011 | 1.216531 | 1.5143   | 1.615471 | 1.016304  |
| ENSMUSG Ccsap    | 0.881675 | 0.649944 | 1.006015 | 0.963792 | 0.976396 | 1.172335  |
| ENSMUSG Olfr173  | 0.130499 | 0.037384 | 0.059596 | 0.018792 | 0.139986 | 0.080067  |
| ENSMUSG Cog2     | 10.10363 | 10.22388 | 9.403405 | 9.584322 | 9.907118 | 9.296241  |
| ENSMUSG Slc8a2   | 0.179918 | 0.130199 | 0.061139 | 0.118944 | 0.216004 | 0.112101  |
| ENSMUSG Strn4    | 26.77689 | 25.62247 | 27.60048 | 22.7847  | 23.23656 | 23.699542 |
| ENSMUSG Psg28    | 0        | 0        | 0        | 0        | 0        | 0         |
| ENSMUSG Pcbp4    | 10.88167 | 10.69276 | 11.36065 | 9.065477 | 8.271326 | 10.519999 |
| ENSMUSG Sult2a8  | 0        | 0        | 0        | 0        | 0        | 0         |
| ENSMUSG Irak1    | 23.3462  | 20.09812 | 20.97102 | 24.53195 | 23.51094 | 24.125578 |
| ENSMUSG Mecp2    | 11.70266 | 11.36945 | 9.226974 | 7.879967 | 8.373046 | 7.465489  |
| ENSMUSG Avpr2    | 0.044997 | 0.011525 | 0.11626  | 0.093027 | 0.014163 | 0.071917  |
| ENSMUSG L1cam    | 5.548221 | 4.758347 | 5.027842 | 3.629916 | 3.720975 | 3.822867  |
| ENSMUSG Tkrl1    | 0        | 0.067514 | 0        | 0.045246 | 0.058214 | 0         |
| ENSMUSG Opn1mw   | 0.038953 | 0        | 0.082207 | 0        | 0        | 0         |
| ENSMUSG Plxna3   | 0.907371 | 0.891896 | 0.881653 | 0.81439  | 0.850034 | 0.874255  |
| ENSMUSG Fam3a    | 18.80559 | 17.31405 | 18.58678 | 13.67524 | 15.89096 | 15.709561 |
| ENSMUSG Tgfbra1  | 16.91881 | 16.96225 | 17.54104 | 15.23267 | 15.39612 | 15.327745 |
| ENSMUSG Mrps23   | 15.03547 | 17.10875 | 15.07473 | 16.6426  | 15.6323  | 15.120117 |
| ENSMUSG Speer4d  | 0        | 0        | 0        | 0.229908 | 0.436124 | 0.213308  |
| ENSMUSG Rraga    | 34.38221 | 34.31617 | 37.45768 | 31.20321 | 30.76004 | 32.104641 |
| ENSMUSG Ttc26    | 2.163437 | 2.173535 | 1.582603 | 2.115675 | 1.994693 | 1.777729  |
| ENSMUSG Lmod1    | 3.257402 | 3.868519 | 3.493315 | 4.494977 | 4.504071 | 4.971536  |
| ENSMUSG Ubald1   | 23.7265  | 19.92274 | 23.36596 | 19.5014  | 19.16909 | 20.599953 |
| ENSMUSG St5      | 34.89758 | 35.42133 | 36.88256 | 26.95451 | 30.92787 | 26.186177 |
| ENSMUSG Trim66   | 0.023133 | 0.013729 | 0.052452 | 0.034127 | 0.021939 | 0         |
| ENSMUSG Stk33    | 5.181107 | 5.856397 | 3.18577  | 5.47991  | 4.399282 | 3.981151  |
| ENSMUSG Tmem9b   | 33.31542 | 33.63364 | 34.24589 | 33.28439 | 30.56348 | 30.094609 |
| ENSMUSG BC051019 | 6.194275 | 7.849593 | 4.056463 | 8.293809 | 7.646699 | 8.836582  |
| ENSMUSG Akip1    | 14.00884 | 14.23607 | 13.43621 | 13.13353 | 13.62565 | 12.897883 |
| ENSMUSG Tub      | 0.034803 | 0.137922 | 0.09673  | 0.171915 | 0.113472 | 0.187773  |
| ENSMUSG Eif3f    | 42.12076 | 36.5709  | 37.79437 | 39.17859 | 41.1315  | 43.591534 |
| ENSMUSG Aasdhpt  | 5.168179 | 5.48438  | 5.498773 | 5.105045 | 5.205012 | 4.782723  |
| ENSMUSG Wasf2    | 47.09652 | 45.09888 | 44.68329 | 33.94861 | 34.64621 | 34.380101 |
| ENSMUSG Gnl2     | 15.65144 | 14.93828 | 14.94511 | 12.18198 | 12.60435 | 12.899316 |
| ENSMUSG Gria4    | 0.020078 | 0.049499 | 0        | 0.037771 | 0.030298 | 0.010155  |
| ENSMUSG Kbtbd3   | 1.47162  | 1.982612 | 1.079455 | 1.863491 | 1.409089 | 1.52303   |
| ENSMUSG Map3k6   | 15.16102 | 11.62228 | 12.35801 | 4.3865   | 6.113081 | 4.204219  |
| ENSMUSG Meaf6    | 7.350847 | 7.812129 | 6.066517 | 7.104632 | 6.999987 | 8.998865  |
| ENSMUSG Ssh3     | 13.52676 | 12.88222 | 13.41912 | 14.07805 | 14.26176 | 15.397271 |
| ENSMUSG Mrps15   | 20.31532 | 18.68884 | 21.04562 | 20.88064 | 21.02386 | 22.108051 |
| ENSMUSG Tut4     | 6.684075 | 6.270926 | 6.318936 | 6.443353 | 6.77322  | 6.1682    |
| ENSMUSG Alkbh8   | 2.893555 | 3.045772 | 2.490226 | 3.058433 | 2.761069 | 2.669058  |
| ENSMUSG Hgf      | 8.541135 | 8.760289 | 8.717035 | 8.90461  | 8.366269 | 7.556065  |
| ENSMUSG Cd164l2  | 0.512414 | 1.115378 | 0.380363 | 0.866816 | 0.853597 | 1.673274  |
| ENSMUSG Susd3    | 2.234492 | 1.55917  | 2.732028 | 5.846054 | 4.24127  | 3.969281  |
| ENSMUSG lppk     | 3.870518 | 4.114786 | 4.189001 | 3.575905 | 3.570593 | 3.603892  |
| ENSMUSG 5930422O | 0.066706 | 0        | 0        | 0        | 0        | 0         |
| ENSMUSG Barx1    | 0        | 0        | 0        | 0        | 0        | 0         |
| ENSMUSG Nhlh2    | 0        | 0        | 0        | 0        | 0        | 0         |
| ENSMUSG Aspnl    | 9.284902 | 7.834802 | 11.82249 | 14.08271 | 13.78679 | 11.762551 |
| ENSMUSG U90926   | 0        | 0        | 0        | 0.135494 | 0        | 0         |
| ENSMUSG Abcb9    | 2.759206 | 3.251457 | 2.440514 | 2.365213 | 2.411804 | 2.191368  |
| ENSMUSG Usp4     | 30.81594 | 31.30663 | 31.37571 | 28.23376 | 26.03243 | 26.655229 |

|                    |          |          |          |          |          |           |
|--------------------|----------|----------|----------|----------|----------|-----------|
| ENSMUSG 1700102P   | 0.081442 | 0.45781  | 0.744478 | 0.600569 | 0.434429 | 0.404731  |
| ENSMUSG Cdkl2      | 8.573052 | 8.847546 | 8.110676 | 7.752891 | 7.058068 | 7.578898  |
| ENSMUSG Snrnp35    | 4.018898 | 5.581053 | 5.198764 | 6.530311 | 5.168898 | 5.51076   |
| ENSMUSG Rilpl2     | 11.618   | 12.98694 | 12.36161 | 23.76553 | 24.89182 | 29.852604 |
| ENSMUSG Uso1       | 23.54351 | 23.269   | 23.77434 | 27.82258 | 27.4966  | 26.794904 |
| ENSMUSG Pitpnm2    | 30.49074 | 27.78991 | 29.45792 | 20.89199 | 21.30137 | 20.520759 |
| ENSMUSG G3bp2      | 28.68969 | 31.0371  | 29.663   | 29.703   | 28.64754 | 30.033024 |
| ENSMUSG Arl6ip4    | 28.0169  | 26.09087 | 31.05453 | 27.90503 | 27.70521 | 28.83082  |
| ENSMUSG Rnf214     | 9.096965 | 8.746929 | 7.059357 | 8.050233 | 7.194194 | 7.173689  |
| ENSMUSG Lgr6       | 0.760041 | 1.03897  | 0.440651 | 0.833062 | 0.774626 | 0.486086  |
| ENSMUSG Olfr1032   | 0        | 0        | 0        | 0        | 0        | 0         |
| ENSMUSG Aqp11      | 1.882377 | 2.00697  | 1.575216 | 2.130941 | 1.856033 | 1.590547  |
| ENSMUSG D3Erttd751 | 2.94401  | 3.092406 | 2.862962 | 2.331316 | 2.70081  | 2.107212  |
| ENSMUSG Jade1      | 9.802569 | 10.2888  | 10.31083 | 7.408921 | 8.88244  | 8.881445  |
| ENSMUSG Larp1b     | 8.795137 | 8.054087 | 8.732146 | 8.382346 | 8.14822  | 8.141964  |
| ENSMUSG Ptcd2      | 8.821974 | 10.01308 | 10.05666 | 10.53268 | 8.493242 | 8.97953   |
| ENSMUSG Olfr947-ps | 0        | 0        | 0        | 0        | 0        | 0         |
| ENSMUSG 1700057G   | 0        | 0.039897 | 0        | 0        | 0        | 0         |
| ENSMUSG Elk1       | 4.071983 | 4.074539 | 3.053326 | 4.021892 | 3.843926 | 3.875127  |
| ENSMUSG Rnf216     | 18.5626  | 19.06334 | 18.19022 | 14.4624  | 15.55203 | 15.143088 |
| ENSMUSG E130308A   | 1.617098 | 2.045568 | 1.216881 | 1.41487  | 1.197316 | 1.108431  |
| ENSMUSG Cabs1      | 0        | 0        | 0        | 0        | 0        | 0         |
| ENSMUSG Hmgcll1    | 2.450673 | 3.047391 | 2.0285   | 2.629194 | 2.829885 | 2.392967  |
| ENSMUSG Myo7b      | 0.007781 | 0.018016 | 0.028245 | 0.044312 | 0        | 0         |
| ENSMUSG Csnk2b     | 54.39263 | 59.25184 | 57.45591 | 55.07506 | 56.61616 | 56.433735 |
| ENSMUSG Proc       | 0.740665 | 0.396746 | 0.337246 | 0.099438 | 0.491445 | 0.203014  |
| ENSMUSG lws1       | 5.619805 | 5.235685 | 5.013748 | 4.975409 | 5.065832 | 4.376172  |
| ENSMUSG Map3k2     | 7.332839 | 7.744298 | 6.106898 | 5.869348 | 5.902922 | 5.714705  |
| ENSMUSG Ercc3      | 15.28498 | 13.10686 | 14.72745 | 12.5744  | 12.96464 | 13.029409 |
| ENSMUSG Bin1       | 19.35378 | 19.26027 | 21.68932 | 21.81448 | 20.79835 | 22.166921 |
| ENSMUSG Apol7c     | 0        | 0        | 0.043384 | 0.237541 | 0.042325 | 0         |
| ENSMUSG Ubr3       | 15.5436  | 16.05486 | 13.47925 | 14.97439 | 14.1324  | 13.519987 |
| ENSMUSG Cdkn2a     | 0.853529 | 0.530798 | 0.839259 | 1.979653 | 1.799553 | 2.1628    |
| ENSMUSG Zfp385a    | 3.98868  | 3.62805  | 4.725994 | 8.054478 | 8.52491  | 9.123068  |
| ENSMUSG Fgf22      | 0.052094 | 0.021409 | 0.060168 | 0        | 0.170396 | 0.071228  |
| ENSMUSG Bex6       | 0.049961 | 0.030296 | 0.033168 | 0.068331 | 0.12568  | 0         |
| ENSMUSG Cenpw      | 0.29624  | 0.220331 | 0.405338 | 0.236404 | 0.41824  | 0.51034   |
| ENSMUSG Pjvk       | 0        | 0        | 0.072619 | 0        | 0        | 0         |
| ENSMUSG Syt17      | 1.572461 | 1.999346 | 1.493737 | 1.591429 | 1.08137  | 1.567741  |
| ENSMUSG Cxcl2      | 1.14947  | 0.312667 | 0.256772 | 0.882747 | 0.494451 | 0.508237  |
| ENSMUSG Mark2      | 21.46829 | 23.71456 | 22.64932 | 21.47633 | 21.11998 | 22.791278 |
| ENSMUSG Rcor2      | 0.548048 | 0.298292 | 0.534262 | 0.392965 | 0.420529 | 0.427751  |
| ENSMUSG Dnajc4     | 10.45577 | 11.13118 | 11.04695 | 10.4509  | 10.13567 | 10.888739 |
| ENSMUSG Vegfb      | 13.51429 | 12.96288 | 13.93595 | 12.6875  | 12.54189 | 12.123169 |
| ENSMUSG Plcb3      | 29.79261 | 28.85911 | 28.97077 | 23.60522 | 25.72568 | 25.340471 |
| ENSMUSG Stip1      | 34.59142 | 59.99077 | 52.27766 | 40.52372 | 44.94444 | 45.77359  |
| ENSMUSG Fermt3     | 12.02207 | 10.66655 | 14.81334 | 24.1389  | 24.20432 | 27.321289 |
| ENSMUSG Blvra      | 15.7569  | 14.64304 | 16.09397 | 15.62337 | 17.46285 | 20.950525 |
| ENSMUSG Ap4e1      | 3.59987  | 3.393089 | 3.385677 | 2.951201 | 2.763688 | 3.115279  |
| ENSMUSG Sipa1l2    | 20.86112 | 20.28846 | 17.88137 | 11.46626 | 13.27492 | 10.925545 |
| ENSMUSG Armc6      | 6.029822 | 5.751047 | 6.116396 | 5.846666 | 5.581666 | 6.329386  |
| Mus_musc Mus_musc  | 0        | 0        | 0        | 0.080691 | 0        | 0         |
| Mus_musc Mus_musc  | 0        | 0        | 0        | 0        | 0        | 0.184186  |
| Mus_musc Mus_musc  | 0.284382 | 0.329416 | 0.267832 | 0.504624 | 0.689453 | 0.458766  |
| ENSMUSG Galt       | 10.07384 | 9.466522 | 9.315884 | 9.517585 | 10.0176  | 8.997215  |
| ENSMUSG Olfr1325   | 0        | 0        | 0        | 0        | 0        | 0         |
| ENSMUSG Senp8      | 1.427088 | 1.136375 | 1.55437  | 1.3005   | 0.984745 | 1.138715  |
| Mus_musc Mus_musc  | 0.542481 | 0.533592 | 0.172172 | 0.248245 | 0.672619 | 0.525212  |
| ENSMUSG Tmem198    | 0.656413 | 0.560723 | 0.868262 | 0.642068 | 0.850644 | 0.673945  |
| ENSMUSG Adamtsl5   | 19.71826 | 18.67987 | 18.58361 | 12.88337 | 10.41184 | 11.560791 |
| ENSMUSG Hunk       | 3.144235 | 6.149409 | 2.773977 | 1.448387 | 1.641736 | 1.495398  |
| ENSMUSG Nr1i3      | 0.312634 | 0.019003 | 0.225684 | 0.325593 | 0.040435 | 0.067385  |
| ENSMUSG Tomm40l    | 5.303321 | 5.439578 | 5.975328 | 4.669873 | 4.950198 | 5.240804  |
| ENSMUSG Kit        | 61.32801 | 49.02263 | 53.04649 | 34.64702 | 41.50108 | 35.233349 |

|                   |          |          |          |          |          |           |
|-------------------|----------|----------|----------|----------|----------|-----------|
| ENSMUSG Otud6b    | 13.73807 | 14.33869 | 14.33383 | 12.27317 | 12.2074  | 12.004928 |
| ENSMUSG C3ar1     | 0.823975 | 0.734734 | 0.696033 | 8.098239 | 9.315276 | 9.929072  |
| ENSMUSG Aipl1     | 0        | 0        | 0.039864 | 0.081685 | 0        | 0.022995  |
| ENSMUSG Mettl27   | 2.596899 | 2.041091 | 2.90732  | 3.412282 | 3.502121 | 3.29156   |
| ENSMUSG Opn3      | 0.702839 | 0.640841 | 0.309312 | 0.86236  | 0.879029 | 0.886713  |
| ENSMUSG Rgs7      | 0        | 0.072235 | 0        | 0        | 0        | 0         |
| ENSMUSG Fh1       | 19.19244 | 20.39209 | 19.12345 | 20.42599 | 20.31561 | 20.39085  |
| ENSMUSG Pycr2     | 16.53064 | 16.18294 | 15.21789 | 20.62047 | 20.24348 | 21.081165 |
| ENSMUSG Wdr64     | 0        | 0        | 0        | 0        | 0        | 0         |
| ENSMUSG Vmn1r132  | 0        | 0        | 0        | 0        | 0        | 0         |
| ENSMUSG Casq1     | 0.72469  | 1.042569 | 0.76346  | 0.46599  | 0.350743 | 0.412749  |
| ENSMUSG Gm7233    | 0        | 0        | 0        | 0.037271 | 0.046859 | 0         |
| ENSMUSG Slc6a16   | 0        | 0        | 0        | 0        | 0        | 0         |
| ENSMUSG Btdb35f8  | 0        | 0        | 0        | 0        | 0        | 0         |
| ENSMUSG Gm7995    | 0        | 0        | 0        | 0        | 0        | 0         |
| ENSMUSG Sult2a7   | 0        | 0        | 0        | 0        | 0        | 0         |
| Mus_musc Mus_musc | 0.306613 | 0.063466 | 0.05722  | 0.160544 | 0.08371  | 0.209735  |
| Mus_musc Mus_musc | 0        | 0        | 0        | 0        | 0        | 0         |
| Mus_musc Mus_musc | 0        | 0        | 0        | 0        | 0        | 0         |
| Mus_musc Mus_musc | 0.081517 | 0.369718 | 0        | 0.104611 | 0        | 0         |
| Mus_musc Mus_musc | 0.188031 | 0.149512 | 0.196946 | 0        | 0        | 0         |
| ENSMUSG Nxf2      | 0.08219  | 0        | 0.037204 | 0.037959 | 0.100774 | 0         |
| ENSMUSG Cfap65    | 2.965328 | 2.816851 | 2.376507 | 4.292703 | 3.648249 | 3.51411   |
| ENSMUSG Mipol1    | 2.912016 | 2.244165 | 1.996    | 2.24112  | 1.832867 | 1.952524  |
| ENSMUSG Ccer1     | 0        | 0        | 0        | 0        | 0        | 0         |
| ENSMUSG Acsm4     | 0        | 0        | 0        | 0        | 0        | 0         |
| ENSMUSG Scgb2b12  | 0        | 0        | 0        | 0        | 0        | 0         |
| Mus_musc Mus_musc | 0        | 0.259297 | 0        | 0        | 0        | 0         |
| Mus_musc Mus_musc | 0.21817  | 0.066867 | 0.268186 | 0.174016 | 0        | 0         |
| Mus_musc Mus_musc | 0        | 0.154309 | 0        | 0.067382 | 0        | 0         |
| Mus_musc Mus_musc | 0.196762 | 0.255413 | 0.242572 | 0.603217 | 0.059791 | 0.156662  |
| Mus_musc Mus_musc | 3.930543 | 4.015555 | 3.543109 | 6.535855 | 3.570502 | 3.69872   |
| Mus_musc Mus_musc | 1.082491 | 1.000935 | 0.921838 | 1.352476 | 0.747682 | 1.186358  |
| ENSMUSG Purb      | 24.38654 | 25.01385 | 20.79856 | 18.36782 | 18.68459 | 17.459724 |
| ENSMUSG Gm21958   | 0.521137 | 0.406375 | 0.664841 | 0.342696 | 0        | 0.241865  |
| ENSMUSG Gm28040   | 0.311476 | 0.132713 | 0        | 0.121465 | 0.191844 | 0         |
| ENSMUSG Gm21244   | 0        | 0        | 0        | 0        | 0        | 0         |
| ENSMUSG Pdik1l    | 3.411472 | 4.523935 | 4.010363 | 4.751944 | 4.024091 | 3.907944  |
| ENSMUSG Tatdn1    | 6.354469 | 5.472918 | 5.182303 | 5.087682 | 6.460639 | 4.341149  |
| ENSMUSG Olfr393   | 0        | 0        | 0        | 0        | 0        | 0         |
| ENSMUSG Rtn4rl2   | 0.909687 | 0.914354 | 0.946609 | 1.390707 | 1.479487 | 1.659055  |
| ENSMUSG Ccdc184   | 0.976159 | 0.917821 | 1.156563 | 0.483177 | 0.535369 | 0.838892  |
| Mus_musc Mus_musc | 0        | 0        | 0        | 0        | 0        | 0.184186  |
| Mus_musc Mus_musc | 0.394472 | 0        | 0.110261 | 0        | 0        | 0         |
| ENSMUSG Olfr1118  | 0        | 0        | 0        | 0        | 0        | 0         |
| Mus_musc Mus_musc | 0        | 0.276572 | 0.22588  | 0.297359 | 0.244052 | 0.653591  |
| Mus_musc Mus_musc | 187.696  | 186.2696 | 364.9829 | 443.561  | 339.791  | 409.48432 |
| Mus_musc Mus_musc | 0        | 0        | 0.221251 | 0        | 0.285472 | 0.140993  |
| Mus_musc Mus_musc | 0        | 0.088509 | 0.097023 | 0        | 0.186738 | 0         |
| Mus_musc Mus_musc | 3.941139 | 4.445963 | 3.878985 | 2.710637 | 4.606923 | 2.138228  |
| Mus_musc Mus_musc | 0.116006 | 0        | 0.186812 | 0.098596 | 0        | 0.112073  |
| Mus_musc Mus_musc | 0.352044 | 0.212977 | 0.427439 | 0.154375 | 0.270515 | 0.544535  |
| Mus_musc Mus_musc | 0        | 0.154309 | 0        | 0        | 0        | 0         |
| Mus_musc Mus_musc | 0        | 0.192751 | 0        | 0        | 0        | 0         |
| Mus_musc Mus_musc | 1.194858 | 0.919472 | 1.332436 | 1.113163 | 0.761283 | 0.666499  |
| Mus_musc Mus_musc | 0.25426  | 0        | 0        | 0        | 0        | 0         |
| Mus_musc Mus_musc | 0.18679  | 0.279128 | 0.167682 | 0.230281 | 0.283009 | 0.098437  |
| Mus_musc Mus_musc | 0        | 0.154309 | 0        | 0        | 0        | 0         |
| ENSMUSG Aipl1     | 4.677753 | 4.619992 | 4.167153 | 3.281835 | 4.160538 | 3.651219  |
| ENSMUSG Gm3099    | 0        | 0        | 0        | 0        | 0        | 0         |
| ENSMUSG Rnaset2a  | 51.49773 | 32.72921 | 48.45365 | 49.86238 | 64.35497 | 66.089697 |
| ENSMUSG Gm10662   | 0        | 0        | 0        | 0        | 0        | 0         |
| ENSMUSG Gm8281    | 0        | 0.020533 | 0        | 0        | 0        | 0         |
| ENSMUSG Gm21783   | 0        | 0        | 0        | 0        | 0        | 0         |

|                   |          |          |          |          |          |           |
|-------------------|----------|----------|----------|----------|----------|-----------|
| ENSMUSG Gm16485   | 0.288633 | 0.241324 | 0.208933 | 0.178429 | 0.099463 | 0.209805  |
| ENSMUSG Olfr828   | 0        | 0        | 0        | 0        | 0        | 0         |
| ENSMUSG Vmn1r165  | 0        | 0        | 0        | 0        | 0        | 0         |
| ENSMUSG Olfr483   | 0        | 0        | 0        | 0        | 0        | 0         |
| ENSMUSG mt-Nd5    | 1062.965 | 1109.845 | 892.2613 | 1219.745 | 1214.368 | 1025.2604 |
| ENSMUSG mt-Nd3    | 255.7184 | 332.9214 | 228.4638 | 310.2368 | 239.1164 | 216.72159 |
| ENSMUSG mt-Nd4    | 1575.124 | 1894.23  | 1427.883 | 1558.529 | 1544.35  | 1395.4288 |
| Mus_musc Mus_musc | 0        | 0.154863 | 0.123873 | 0.253739 | 0.055606 | 0.175594  |
| Mus_musc Mus_musc | 0.36569  | 0.0777   | 0        | 0        | 0.377082 | 0.26677   |
| ENSMUSG mt-Nd6    | 914.2303 | 941.188  | 811.9387 | 970.2787 | 988.6653 | 842.42053 |
| ENSMUSG Olfr803   | 0        | 0        | 0        | 0        | 0        | 0         |
| ENSMUSG Rp1l1     | 0        | 0        | 0        | 0        | 0        | 0         |
| ENSMUSG Mnx1      | 0        | 0        | 0        | 0        | 0        | 0         |
| ENSMUSG Nom1      | 4.164114 | 3.811032 | 3.643855 | 3.214807 | 3.397633 | 3.406167  |
| ENSMUSG C1ql1     | 0.050678 | 0        | 0.102646 | 0.063322 | 0        | 0         |
| ENSMUSG Kcna5     | 0.291114 | 0.176889 | 0.243384 | 0.138489 | 0.225942 | 0.112816  |
| ENSMUSG Sprr3     | 0        | 0        | 0        | 0        | 0        | 0         |
| ENSMUSG Ddx28     | 4.417365 | 5.149155 | 3.434309 | 3.924577 | 4.120163 | 4.319831  |
| Mus_musc Mus_musc | 0.024855 | 0.009147 | 0.065034 | 1.483164 | 0.99099  | 1.634525  |
| Mus_musc Mus_musc | 0        | 0        | 0        | 0        | 0        | 0         |
| Mus_musc Mus_musc | 0.163723 | 0.149909 | 0        | 0.328017 | 0.294591 | 0.335457  |
| Mus_musc Mus_musc | 0        | 0.15837  | 0.222284 | 0.300705 | 0        | 0.346965  |
| Mus_musc Mus_musc | 0.225715 | 0.341431 | 0        | 0.197338 | 0.360527 | 0.233467  |
| Mus_musc Mus_musc | 0.281156 | 0        | 0        | 0        | 0        | 0         |
| Mus_musc Mus_musc | 0.286546 | 0.253869 | 0.265605 | 0.420024 | 0.236607 | 0.199322  |
| Mus_musc Mus_musc | 0.359946 | 0.053233 | 0.241516 | 0.387439 | 0.48382  | 0.250064  |
| ENSMUSG Cpped1    | 10.99418 | 11.81477 | 11.66072 | 11.08659 | 12.29683 | 12.499764 |
| ENSMUSG Zmat2     | 23.85142 | 23.00343 | 26.13724 | 24.58543 | 23.69173 | 23.622561 |
| ENSMUSG Hars      | 21.62054 | 20.78046 | 21.36127 | 21.69013 | 20.18396 | 22.128296 |
| Mus_musc Mus_musc | 0        | 0        | 0        | 0        | 0        | 0         |
| ENSMUSG Tspyl2    | 10.8484  | 10.32401 | 10.8858  | 8.077131 | 8.779699 | 9.174774  |
| ENSMUSG BC024063  | 0.963035 | 1.221359 | 0.957919 | 0.999826 | 0.950023 | 1.002568  |
| Mus_musc Mus_musc | 0        | 0.350539 | 0        | 0        | 0.177511 | 0         |
| ENSMUSG Olfr1180  | 0        | 0        | 0        | 0        | 0        | 0         |
| Mus_musc Mus_musc | 0        | 0        | 0        | 0.258047 | 0        | 0         |
| Mus_musc Mus_musc | 0.388093 | 0.468903 | 0.578162 | 0.465556 | 0.365801 | 0.540334  |
| Mus_musc Mus_musc | 0.168636 | 0.30772  | 0.097316 | 0.087853 | 0.123616 | 0.178335  |
| Mus_musc Mus_musc | 0.043838 | 0.067194 | 0        | 0        | 0        | 0.210803  |
| ENSMUSG Agr1b     | 0.068662 | 0.073094 | 0.067905 | 0.145729 | 0.101042 | 0.038862  |
| ENSMUSG Sec14l3   | 574.8788 | 597.0476 | 446.5634 | 369.981  | 362.5669 | 377.75467 |
| ENSMUSG Ak7       | 7.806277 | 8.663551 | 4.264289 | 8.786076 | 9.425252 | 8.628472  |
| ENSMUSG Inhba     | 0.151161 | 0.362277 | 0.241111 | 2.03106  | 2.780351 | 2.884993  |
| ENSMUSG Wap       | 0        | 0        | 0        | 0.089061 | 0        | 0         |
| ENSMUSG Atp1b2    | 3.269015 | 2.629648 | 4.176712 | 2.084061 | 2.414454 | 2.609327  |
| ENSMUSG Tmprss2   | 20.909   | 24.29581 | 21.4056  | 21.05465 | 18.65321 | 22.172451 |
| ENSMUSG Tbrg4     | 7.745095 | 6.21055  | 7.894335 | 8.257117 | 7.818547 | 8.204934  |
| ENSMUSG Mx1       | 0.396876 | 0.337695 | 0.797529 | 1.297168 | 1.222032 | 1.642831  |
| ENSMUSG Plekhg4   | 0.034612 | 0.221461 | 0.04196  | 0.059205 | 0.044868 | 0         |
| ENSMUSG Chrna10   | 0.154045 | 0.264918 | 0.063344 | 0.263183 | 0.140674 | 0.264642  |
| ENSMUSG Vps37b    | 11.38278 | 9.262014 | 12.15985 | 8.113805 | 7.822814 | 7.974521  |
| ENSMUSG Adam2     | 0        | 0        | 0        | 0        | 0        | 0         |
| ENSMUSG Clu       | 66.9115  | 84.10119 | 58.60016 | 78.42332 | 70.16867 | 92.660767 |
| ENSMUSG Ccdc25    | 9.806725 | 11.20251 | 10.67661 | 10.53504 | 9.013305 | 11.900195 |
| ENSMUSG Esco2     | 0.245932 | 0.222485 | 0.366695 | 0.547079 | 1.075516 | 0.973791  |
| ENSMUSG Pbk       | 0.26871  | 0.538826 | 0.649619 | 1.544798 | 2.238029 | 2.829508  |
| ENSMUSG Scara5    | 2.199606 | 3.094462 | 1.275303 | 2.498275 | 2.251847 | 1.665929  |
| ENSMUSG Elp3      | 16.51958 | 14.7196  | 14.08487 | 13.87201 | 14.18987 | 13.552709 |
| ENSMUSG Olfr559   | 0        | 0        | 0        | 0        | 0.027401 | 0.023249  |
| ENSMUSG Dach1     | 7.81951  | 5.211482 | 5.841655 | 5.414842 | 6.149795 | 5.903914  |
| ENSMUSG Zfp580    | 4.907171 | 4.362321 | 5.191382 | 4.087974 | 3.075689 | 3.445663  |
| ENSMUSG Hmcn2     | 0.218076 | 0.245705 | 0.134903 | 0.104092 | 0.12465  | 0.169     |
| ENSMUSG Zfp809    | 21.90954 | 24.68791 | 17.34475 | 22.08469 | 19.37956 | 24.351872 |
| ENSMUSG Vmn1r12   | 0        | 0        | 0        | 0        | 0        | 0         |
| ENSMUSG Gm49394   | 0.017622 | 0        | 0.008329 | 0        | 0        | 0         |

|                   |          |          |          |          |          |           |
|-------------------|----------|----------|----------|----------|----------|-----------|
| ENSMUSG Gjb6      | 3.552501 | 3.307889 | 4.022194 | 1.875637 | 3.425035 | 2.348747  |
| ENSMUSG Baz2a     | 17.52026 | 16.92416 | 18.27306 | 17.32941 | 16.87157 | 17.433106 |
| ENSMUSG Zar1l     | 0        | 0        | 0        | 0        | 0        | 0         |
| ENSMUSG Gm8251    | 0.049985 | 0.045274 | 0.03565  | 0.057802 | 0.040926 | 0.064473  |
| Mus_musc Mus_musc | 0        | 0        | 0        | 0        | 0        | 0         |
| Mus_musc Mus_musc | 0.634171 | 0.648924 | 1.177051 | 0.380102 | 0.449874 | 0.479535  |
| Mus_musc Mus_musc | 0        | 0        | 0        | 0        | 0        | 0         |
| Mus_musc Mus_musc | 0        | 0        | 0        | 0.282953 | 0        | 0         |
| Mus_musc Mus_musc | 0        | 0        | 0        | 0        | 0        | 0         |
| Mus_musc Mus_musc | 0        | 0        | 0        | 0        | 0        | 0.552559  |
| ENSMUSG Gm11938   | 0        | 0        | 0        | 0        | 0        | 0         |
| ENSMUSG Pkn1      | 33.44283 | 32.12262 | 34.33995 | 31.25872 | 30.6223  | 29.509982 |
| ENSMUSG Strip1    | 11.45726 | 11.94836 | 12.44773 | 11.24372 | 11.90119 | 12.233662 |
| ENSMUSG Alx3      | 0.049667 | 0        | 0        | 0.037886 | 0.086572 | 0.021918  |
| ENSMUSG Tnnt3     | 0.599296 | 1.065721 | 0.943318 | 0.740415 | 0.41889  | 1.206855  |
| ENSMUSG Akna      | 11.60346 | 10.18146 | 14.22606 | 16.08868 | 14.65921 | 15.196187 |
| ENSMUSG Ube2h     | 33.47433 | 33.78291 | 28.41109 | 27.41263 | 28.83305 | 27.789819 |
| ENSMUSG Runx2     | 1.194871 | 1.244946 | 1.544488 | 1.617144 | 1.698151 | 1.90416   |
| ENSMUSG Shd       | 0.112624 | 0.177166 | 0.182242 | 0.173429 | 0.035503 | 0.165438  |
| ENSMUSG Cdh26     | 0.064983 | 0.244093 | 0        | 0.094548 | 0.07704  | 0.074105  |
| ENSMUSG Stim2     | 13.15386 | 11.44936 | 12.12654 | 9.586221 | 9.083943 | 9.77583   |
| ENSMUSG Fam102a   | 12.36275 | 12.22781 | 10.80302 | 10.61776 | 10.0662  | 10.618121 |
| ENSMUSG Pcna-ps2  | 0.63627  | 0.191342 | 0.628303 | 0.865236 | 0.244753 | 0.64027   |
| ENSMUSG Nms       | 0        | 0        | 0        | 0        | 0        | 0         |
| ENSMUSG Rgs7bp    | 0.547276 | 0.680524 | 0.57021  | 0.748955 | 0.92469  | 0.790723  |
| ENSMUSG 4933425LC | 0        | 0        | 0        | 0        | 0        | 0         |
| ENSMUSG Srek1ip1  | 4.556205 | 5.108583 | 4.011609 | 5.205143 | 5.359386 | 4.742875  |
| ENSMUSG Cwc27     | 6.346402 | 5.633481 | 6.876828 | 4.965258 | 4.852829 | 4.676338  |
| ENSMUSG Cenpk     | 0.316503 | 0.510135 | 0.290613 | 0.510878 | 0.557311 | 0.532888  |
| ENSMUSG Ppwd1     | 5.577228 | 5.613711 | 5.995356 | 4.896174 | 5.218481 | 5.881757  |
| ENSMUSG Trim23    | 6.945892 | 7.049628 | 6.473128 | 6.525879 | 6.009318 | 5.713373  |
| ENSMUSG Trappc13  | 13.95595 | 12.8554  | 11.73922 | 13.5942  | 14.3154  | 12.983201 |
| ENSMUSG Nln       | 7.387709 | 7.05609  | 6.576486 | 6.744807 | 7.474959 | 7.873345  |
| ENSMUSG Olfr169   | 0        | 0.012286 | 0        | 0        | 0        | 0         |
| ENSMUSG Doxl2     | 0        | 0        | 0        | 0        | 0        | 0         |
| ENSMUSG Ugt2b35   | 0        | 0        | 0        | 0        | 0        | 0         |
| ENSMUSG Plekhs1   | 0.079388 | 0.074364 | 0.108267 | 1.37256  | 0.697647 | 0.886094  |
| ENSMUSG Chd2      | 12.46936 | 11.83491 | 9.842163 | 10.66281 | 10.77622 | 10.668382 |
| ENSMUSG Ankrd34a  | 0.137074 | 0        | 0.049052 | 0.187153 | 0.069025 | 0.14183   |
| ENSMUSG Gpr137c   | 1.762902 | 1.987766 | 1.992872 | 1.005641 | 1.137075 | 1.323089  |
| ENSMUSG Il23r     | 0.161807 | 0.085155 | 0.097777 | 0.14513  | 0.18159  | 0.089354  |
| ENSMUSG Zadh2     | 18.13823 | 18.25554 | 16.84356 | 14.41038 | 14.09294 | 15.13971  |
| ENSMUSG Sephs2    | 16.46385 | 13.10491 | 15.61973 | 16.67038 | 16.41195 | 17.918098 |
| ENSMUSG Lamb2     | 44.2548  | 38.23231 | 39.12389 | 28.83454 | 29.4918  | 30.623559 |
| ENSMUSG Senp7     | 5.550811 | 6.221558 | 4.893546 | 5.043483 | 5.137389 | 4.525469  |
| ENSMUSG Olfr147   | 0        | 0        | 0        | 0        | 0        | 0         |
| ENSMUSG Cyp2j6    | 4.466698 | 4.222367 | 3.59513  | 3.791739 | 3.531411 | 3.592526  |
| ENSMUSG Gm10134   | 0.550276 | 0.878469 | 1.771834 | 1.430038 | 1.348497 | 1.353476  |
| ENSMUSG Sec24a    | 5.345491 | 5.217201 | 3.984366 | 6.451666 | 7.089378 | 7.03806   |
| ENSMUSG Gadd45a   | 9.457766 | 8.279455 | 9.733444 | 10.56995 | 9.638851 | 11.4703   |
| ENSMUSG Olfr64    | 0        | 0        | 0        | 0        | 0        | 0         |
| ENSMUSG Glb1l2    | 8.812704 | 9.020469 | 7.161133 | 4.432651 | 4.497767 | 4.49251   |
| ENSMUSG Ppp1r11   | 21.93719 | 22.70848 | 25.01739 | 22.98098 | 24.12764 | 22.760214 |
| ENSMUSG Fbxo21    | 10.35592 | 9.457382 | 9.733561 | 7.548588 | 8.39597  | 8.43603   |
| ENSMUSG Styk1     | 0.098967 | 0.092768 | 0.242658 | 0.188226 | 0.17189  | 0.140483  |
| ENSMUSG Pcif1     | 16.59449 | 16.61931 | 15.46177 | 12.64498 | 12.05078 | 13.083855 |
| ENSMUSG 1700031FC | 0        | 0        | 0        | 0        | 0        | 0         |
| ENSMUSG Rapgef1   | 24.82788 | 22.53383 | 23.23903 | 18.90146 | 19.19073 | 18.343299 |
| ENSMUSG Nfyc      | 16.36933 | 18.20715 | 16.64658 | 14.92569 | 14.97881 | 15.345574 |
| ENSMUSG Mcph1     | 1.18532  | 1.156363 | 1.092758 | 1.463983 | 1.435094 | 1.712214  |
| ENSMUSG Rangrf    | 1.167877 | 1.231635 | 0.873748 | 0.727383 | 0.936785 | 0.973909  |
| ENSMUSG Zfp800    | 5.399747 | 5.440049 | 5.016895 | 6.999959 | 5.619602 | 4.644534  |
| ENSMUSG Prok1     | 0        | 0        | 0        | 0        | 0.016457 | 0.03608   |
| ENSMUSG Itgad     | 0.020776 | 0.051548 | 0.133974 | 0.116533 | 0.235914 | 0.074041  |

|                  |          |          |          |          |          |           |
|------------------|----------|----------|----------|----------|----------|-----------|
| ENSMUSG Timp3    | 333.529  | 323.6476 | 292.5664 | 146.4242 | 180.1499 | 155.73694 |
| ENSMUSG Plpp4    | 0        | 0        | 0.029591 | 0        | 0        | 0.072003  |
| ENSMUSG Amy2a1   | 0        | 0        | 0        | 0        | 0        | 0         |
| ENSMUSG Btbd11   | 0.424778 | 0.376469 | 0.243628 | 0.466098 | 0.422864 | 0.509346  |
| ENSMUSG Ckap2l   | 0.838289 | 0.749853 | 0.544075 | 2.402222 | 2.825619 | 2.97393   |
| ENSMUSG Vmn2r49  | 0        | 0        | 0        | 0        | 0        | 0         |
| ENSMUSG Gm3727   | 0        | 0        | 0        | 0        | 0        | 0         |
| ENSMUSG Sgcd     | 2.234574 | 1.319883 | 0.89159  | 1.316376 | 1.373234 | 1.316019  |
| ENSMUSG Cmtm4    | 18.05284 | 19.69075 | 16.32211 | 14.42575 | 15.40391 | 14.700201 |
| ENSMUSG Mfsd6l   | 1.868448 | 1.549235 | 1.117931 | 1.683395 | 1.220569 | 1.186303  |
| ENSMUSG 9130401M | 8.356338 | 8.521771 | 8.177189 | 9.318995 | 9.15195  | 10.152899 |
| ENSMUSG Cyp27b1  | 0.074043 | 0        | 0.025241 | 0        | 0.064584 | 0         |
| ENSMUSG Zfp867   | 3.00707  | 2.778833 | 2.694859 | 2.132386 | 2.75549  | 2.156685  |
| ENSMUSG Acsm2    | 0        | 0        | 0        | 0        | 0        | 0         |
| ENSMUSG Lhpp     | 3.207598 | 3.450425 | 3.030461 | 5.146225 | 5.509093 | 5.211732  |
| ENSMUSG Thumpd1  | 10.50969 | 9.803946 | 10.05293 | 9.359208 | 8.706639 | 9.425076  |
| ENSMUSG Zfp408   | 3.985317 | 3.367771 | 3.824757 | 3.239375 | 3.355951 | 3.361492  |
| ENSMUSG Exoc6b   | 10.14357 | 10.67111 | 8.846003 | 8.206644 | 8.226854 | 7.603981  |
| ENSMUSG Nrnx2    | 1.62783  | 1.253516 | 1.986946 | 1.218466 | 1.527317 | 1.113494  |
| ENSMUSG Moap1    | 1.281206 | 1.877805 | 1.135367 | 0.782928 | 0.572439 | 0.845688  |
| ENSMUSG Calm4    | 0        | 0        | 0        | 0        | 0        | 0         |
| ENSMUSG Gm10147  | 0        | 0        | 0        | 0        | 0        | 0         |
| ENSMUSG Tmem131l | 4.852578 | 5.155904 | 5.054701 | 6.461545 | 6.143693 | 6.149002  |
| ENSMUSG Rbm4b    | 7.313329 | 8.21302  | 8.180633 | 7.023834 | 6.08869  | 6.026623  |
| ENSMUSG Mtss1l   | 23.94972 | 23.49193 | 23.21051 | 14.8963  | 15.08244 | 13.217212 |
| ENSMUSG Recql4   | 0.275186 | 0.23115  | 0.2124   | 0.421702 | 0.434945 | 0.394515  |
| ENSMUSG Olfr1491 | 0        | 0        | 0        | 0        | 0        | 0         |
| ENSMUSG 5-Sep    | 2.598258 | 1.9017   | 3.487272 | 4.394354 | 2.743753 | 4.330285  |
| ENSMUSG Vnn1     | 2.454682 | 2.107765 | 1.703941 | 4.404315 | 5.118894 | 5.151688  |
| ENSMUSG Cys1     | 17.67345 | 17.17617 | 16.81014 | 7.86467  | 9.447125 | 7.196126  |
| ENSMUSG Cep85    | 2.644177 | 3.016701 | 3.010105 | 2.916317 | 2.948473 | 3.191679  |
| ENSMUSG Slc7a9   | 0        | 0        | 0        | 0        | 0        | 0         |
| ENSMUSG Faap24   | 2.98436  | 2.819946 | 2.69192  | 3.448479 | 3.415801 | 3.688966  |
| ENSMUSG Tulp1    | 0.80095  | 0.81407  | 1.080086 | 0.990198 | 1.181219 | 1.404802  |
| ENSMUSG Tdrd12   | 0        | 0        | 0        | 0.025995 | 0        | 0         |
| ENSMUSG Gas2     | 0.770181 | 1.076594 | 1.0344   | 0.689615 | 0.491903 | 0.672934  |
| ENSMUSG Kctd15   | 5.089377 | 5.390719 | 6.531633 | 5.156476 | 4.600555 | 5.139805  |
| ENSMUSG Dram2    | 34.37498 | 34.89698 | 35.41478 | 32.35926 | 32.3105  | 31.535995 |
| ENSMUSG Dennd2d  | 5.787275 | 6.941816 | 5.686274 | 8.632113 | 8.180564 | 9.922781  |
| ENSMUSG Chil6    | 0.061437 | 0        | 0        | 0.022534 | 0.086966 | 0         |
| ENSMUSG Ddx20    | 6.282903 | 6.080901 | 5.864091 | 5.739508 | 5.495374 | 5.141269  |
| ENSMUSG Olfr1283 | 0        | 0        | 0        | 0        | 0        | 0         |
| ENSMUSG Tchhl1   | 0        | 0        | 0        | 0        | 0        | 0         |
| ENSMUSG Akap10   | 9.232169 | 8.691709 | 7.985652 | 8.751168 | 8.970749 | 8.93179   |
| ENSMUSG Clip2    | 8.294881 | 8.234937 | 9.033771 | 8.013656 | 8.941681 | 8.780383  |
| ENSMUSG Atf1     | 18.01464 | 18.43256 | 17.10215 | 18.09775 | 18.20648 | 19.476098 |
| ENSMUSG Dip2b    | 7.130817 | 6.853413 | 6.909038 | 6.397984 | 7.273102 | 6.881297  |
| ENSMUSG Larp4    | 10.86984 | 12.09683 | 11.48803 | 12.92019 | 11.85719 | 12.118633 |
| ENSMUSG Supt5    | 33.9556  | 32.97249 | 32.61728 | 33.43636 | 31.75396 | 30.096022 |
| ENSMUSG 1500015O | 0.322697 | 0.461559 | 0.1002   | 0.590343 | 0.974857 | 0.613818  |
| ENSMUSG Lima1    | 33.00921 | 34.06372 | 35.43212 | 27.75061 | 27.37025 | 29.997875 |
| ENSMUSG Cers5    | 29.1596  | 29.98308 | 27.25181 | 27.90067 | 25.36085 | 28.938639 |
| ENSMUSG Cox14    | 37.6414  | 44.91936 | 43.60913 | 43.78011 | 40.28165 | 42.245777 |
| ENSMUSG Cited1   | 0        | 0        | 0.040142 | 0.070245 | 0        | 0.069957  |
| ENSMUSG Khdrbs2  | 0        | 0        | 0        | 0        | 0        | 0.008899  |
| ENSMUSG Timm50   | 12.80829 | 12.87352 | 12.02975 | 12.48282 | 12.92675 | 13.275573 |
| ENSMUSG Aebp2    | 15.9194  | 14.79005 | 16.07712 | 15.7546  | 15.21536 | 13.90624  |
| ENSMUSG Plcz1    | 0        | 0        | 0        | 0        | 0        | 0         |
| ENSMUSG Plekha5  | 10.2605  | 8.471786 | 8.567966 | 7.195539 | 10.089   | 6.922671  |
| ENSMUSG Slco1b2  | 0        | 0        | 0        | 0        | 0        | 0         |
| ENSMUSG Slco1a4  | 0.073629 | 0.080767 | 0.035838 | 0.024079 | 0        | 0         |
| ENSMUSG Slco1c1  | 0.016803 | 0.033018 | 0.094781 | 0.01577  | 0.065618 | 0.019531  |
| ENSMUSG Zcchc3   | 4.919228 | 4.990371 | 4.00653  | 3.730504 | 3.594663 | 3.91604   |
| ENSMUSG Defb23   | 0.0904   | 0        | 0        | 0.066097 | 0.080182 | 0.078515  |

|                   |          |          |          |          |          |           |
|-------------------|----------|----------|----------|----------|----------|-----------|
| ENSMUSG Defb26    | 0        | 0        | 0        | 0        | 0        | 0         |
| ENSMUSG Pmfbp1    | 0        | 0        | 0        | 0        | 0        | 0         |
| ENSMUSG Ces1f     | 6.248807 | 6.957489 | 4.55759  | 3.705231 | 3.872509 | 3.864723  |
| ENSMUSG Hist1h1a  | 0.15073  | 0        | 0.034198 | 0.069512 | 0.046106 | 0.186423  |
| ENSMUSG Adamts16  | 0        | 0        | 0        | 0        | 0        | 0         |
| ENSMUSG Tecrl     | 0.623864 | 0.66852  | 0.799751 | 0.529046 | 0.469432 | 0.146173  |
| ENSMUSG Tceal1    | 4.273875 | 3.725113 | 2.916635 | 2.661522 | 2.759423 | 2.496765  |
| ENSMUSG Clrn2     | 0        | 0        | 0        | 0        | 0        | 0         |
| ENSMUSG Ist1      | 35.68425 | 33.09009 | 34.62927 | 27.98447 | 28.88311 | 29.06035  |
| ENSMUSG Sall2     | 2.656629 | 2.897219 | 2.074733 | 2.392476 | 1.854603 | 2.02794   |
| ENSMUSG Acd       | 6.362265 | 6.37236  | 7.676951 | 6.377963 | 7.328962 | 6.643386  |
| ENSMUSG Cramp1l   | 6.379429 | 6.861231 | 6.035318 | 5.915041 | 5.229794 | 5.470077  |
| ENSMUSG Hpf1      | 9.436069 | 8.70748  | 9.766715 | 9.512176 | 9.253373 | 8.996827  |
| ENSMUSG Acer2     | 158.06   | 141.3054 | 140.4188 | 74.88351 | 74.17109 | 76.56721  |
| ENSMUSG Dnajc22   | 0.028493 | 0.08337  | 0.062649 | 0.071125 | 0.375483 | 0.146167  |
| ENSMUSG Etv3      | 14.88772 | 14.62377 | 14.23499 | 13.74815 | 14.31927 | 14.157601 |
| ENSMUSG Lrrc6     | 1.706358 | 1.884513 | 0.769616 | 2.340075 | 1.981277 | 1.943412  |
| ENSMUSG Adcy8     | 7.623515 | 7.886634 | 7.52294  | 4.791568 | 5.278015 | 4.414577  |
| ENSMUSG Asap1     | 13.535   | 11.50326 | 12.76744 | 10.36646 | 11.20919 | 10.389369 |
| ENSMUSG Mrpl13    | 21.27059 | 19.73741 | 20.32508 | 22.5449  | 22.51134 | 21.777156 |
| ENSMUSG Col14a1   | 6.429081 | 6.177588 | 5.277378 | 11.00466 | 10.32038 | 12.181384 |
| ENSMUSG Sla       | 12.02186 | 14.72369 | 12.79835 | 26.7274  | 29.29755 | 27.498588 |
| ENSMUSG Fam49b    | 13.87677 | 14.35264 | 17.0292  | 23.84262 | 20.34924 | 19.379699 |
| ENSMUSG Setd5     | 17.19626 | 18.3012  | 17.20706 | 16.81702 | 15.94458 | 17.188218 |
| ENSMUSG Colgalt1  | 29.53706 | 29.54326 | 30.88132 | 36.43051 | 38.30851 | 39.876293 |
| ENSMUSG Sos2      | 15.28739 | 17.2515  | 15.53043 | 10.67381 | 12.08577 | 11.096767 |
| ENSMUSG Zfp661    | 1.333921 | 1.268735 | 1.097782 | 1.022739 | 1.085873 | 1.29535   |
| ENSMUSG Pik3r6    | 3.686845 | 3.845449 | 4.273766 | 4.657392 | 4.348474 | 4.206923  |
| ENSMUSG Pnma2     | 0.03043  | 0.05372  | 0        | 0.056639 | 0        | 0.010014  |
| ENSMUSG Lemd3     | 7.03512  | 6.834783 | 6.945036 | 5.544581 | 5.704441 | 5.124756  |
| ENSMUSG Sprr2g    | 0        | 0        | 0        | 0        | 0        | 0         |
| ENSMUSG Scaf8     | 14.27377 | 13.15724 | 12.03073 | 12.25548 | 11.82153 | 12.430947 |
| ENSMUSG Rhno1     | 6.403398 | 5.460634 | 5.492063 | 6.190661 | 6.584348 | 5.353273  |
| Mus_musc Mus_musc | 0.366938 | 0.366485 | 0.30421  | 0.339971 | 0.449435 | 0.483218  |
| Mus_musc Mus_musc | 0.077385 | 0        | 0        | 0.037693 | 0.121316 | 0         |
| Mus_musc Mus_musc | 0.944566 | 1.275042 | 2.488963 | 1.421313 | 1.201878 | 1.27017   |
| Mus_musc Mus_musc | 0        | 0        | 0        | 0.203946 | 0.159981 | 0         |
| Mus_musc Mus_musc | 0.091605 | 0.042741 | 0.07797  | 0.318881 | 0.156375 | 0.236136  |
| Mus_musc Mus_musc | 0.674327 | 0.337149 | 0.410818 | 0.61092  | 0.360546 | 0.437728  |
| ENSMUSG Bend6     | 0.665269 | 0.674465 | 0.455822 | 0.568823 | 0.627513 | 0.506867  |
| ENSMUSG Nfrkb     | 6.591462 | 5.4188   | 5.442427 | 5.507798 | 4.92492  | 4.97559   |
| ENSMUSG 1700069L1 | 0        | 0        | 0        | 0.092924 | 0        | 0         |
| ENSMUSG Tekt3     | 0.186956 | 0.301998 | 0.212427 | 0.563362 | 0.682901 | 0.353726  |
| ENSMUSG Olfr1417  | 0.065425 | 0.106322 | 0.030294 | 0.113637 | 0.025221 | 0.00797   |
| ENSMUSG 4930470P1 | 0        | 0        | 0        | 0        | 0        | 0         |
| ENSMUSG Pxy1p1    | 3.411123 | 4.336542 | 3.539747 | 3.730448 | 3.927051 | 3.82415   |
| ENSMUSG Atp6v1b1  | 1.078414 | 1.292617 | 0.188263 | 2.263539 | 1.99614  | 1.949357  |
| ENSMUSG Mob1b     | 11.36728 | 11.97245 | 9.598901 | 10.37914 | 9.939998 | 9.730012  |
| ENSMUSG Gm2916    | 0        | 0        | 0        | 0        | 0        | 0         |
| ENSMUSG U2surp    | 7.814125 | 14.52911 | 7.413431 | 14.6069  | 8.153861 | 13.706393 |
| ENSMUSG Pias1     | 16.9403  | 16.2616  | 13.7777  | 11.81148 | 12.07351 | 11.72777  |
| ENSMUSG 2300009A1 | 3.785594 | 3.643514 | 3.596495 | 3.912    | 4.945935 | 3.406672  |
| ENSMUSG Smad3     | 9.763929 | 10.16728 | 9.193286 | 10.17036 | 8.686898 | 9.546094  |
| ENSMUSG Lctl      | 0.049266 | 0.400717 | 0        | 0.173693 | 0.026854 | 0         |
| ENSMUSG Zwilch    | 0.397758 | 0.539913 | 0.775227 | 1.066805 | 0.98557  | 1.055896  |
| ENSMUSG Atr       | 3.155858 | 3.044994 | 2.811978 | 3.050996 | 2.828716 | 2.895126  |
| ENSMUSG Colca2    | 3.767501 | 3.202164 | 3.121797 | 3.069005 | 2.659914 | 3.493557  |
| ENSMUSG Tff2      | 0.980726 | 4.386465 | 0.260347 | 46.17    | 42.90311 | 36.591877 |
| ENSMUSG Tff3      | 0        | 0.18376  | 0        | 0.241787 | 0.087098 | 0         |
| ENSMUSG Mpp4      | 0.2639   | 0.231187 | 0.135557 | 0.224794 | 0.064663 | 0.280455  |
| ENSMUSG BC030870  | 1.710999 | 3.836946 | 1.582193 | 2.567056 | 2.2107   | 1.856651  |
| ENSMUSG Kifc1     | 0.901829 | 0.553362 | 0.647648 | 1.387183 | 1.686172 | 2.003934  |
| ENSMUSG Glo1      | 25.84449 | 26.02589 | 25.14102 | 25.30298 | 24.58775 | 24.475406 |
| ENSMUSG Glp1r     | 5.105561 | 5.559157 | 3.79256  | 3.484497 | 5.199319 | 4.497504  |

|                   |          |          |          |          |          |           |
|-------------------|----------|----------|----------|----------|----------|-----------|
| ENSMUSG Peak1     | 18.32605 | 16.49995 | 16.67717 | 14.82414 | 15.0657  | 14.335306 |
| ENSMUSG Spink10   | 0        | 0        | 0        | 0        | 0        | 0         |
| ENSMUSG Wfikkn2   | 0.410075 | 0.17893  | 0.264936 | 0.147587 | 0.183029 | 0.118233  |
| ENSMUSG Ptx4      | 0        | 0.023897 | 0        | 0        | 0        | 0         |
| ENSMUSG Olfr1384  | 0        | 0        | 0        | 0        | 0        | 0         |
| ENSMUSG Hoxd13    | 0        | 0        | 0        | 0        | 0        | 0         |
| ENSMUSG Evx2      | 0        | 0        | 0        | 0        | 0        | 0         |
| ENSMUSG Upk2      | 1.328373 | 1.454041 | 0.480758 | 0.454969 | 0.285124 | 0.791848  |
| ENSMUSG Gna12     | 32.64479 | 35.23767 | 35.1038  | 34.43604 | 37.14986 | 37.768319 |
| ENSMUSG Brat1     | 6.360279 | 6.142325 | 5.939736 | 5.471624 | 5.598265 | 5.723633  |
| ENSMUSG Vstm4     | 9.913333 | 9.021386 | 10.5658  | 7.003215 | 8.523644 | 7.293171  |
| ENSMUSG Trhde     | 0        | 0        | 0        | 0.018273 | 0        | 0         |
| ENSMUSG Axin2     | 11.34983 | 9.348087 | 10.63169 | 6.978302 | 7.377937 | 6.645309  |
| ENSMUSG Rnf123    | 10.78912 | 10.82931 | 11.2442  | 11.86421 | 10.97592 | 12.23354  |
| ENSMUSG Hoga1     | 1.645823 | 1.612838 | 2.364946 | 1.139331 | 1.73478  | 1.57902   |
| ENSMUSG Ccdc160   | 1.285983 | 1.577149 | 2.131719 | 1.049762 | 1.617757 | 1.682019  |
| ENSMUSG Armc1     | 11.62951 | 12.01163 | 11.24647 | 10.01465 | 10.19123 | 9.963133  |
| ENSMUSG Itch      | 19.92218 | 22.12212 | 18.96006 | 19.2661  | 19.04206 | 18.030373 |
| Mus_musc Mus_musc | 0.271124 | 0.304121 | 0        | 0.130693 | 0.027113 | 0.184186  |
| Mus_musc Mus_musc | 0.221835 | 0.495671 | 0.413609 | 0.60652  | 0.357652 | 0.187911  |
| Mus_musc Mus_musc | 0        | 0        | 0.16538  | 0        | 0        | 0         |
| ENSMUSG Ahcy      | 3.791918 | 4.718569 | 4.295881 | 5.935882 | 5.934255 | 5.376819  |
| Mus_musc Mus_musc | 0.327072 | 0.071783 | 0.314884 | 0.482766 | 0.44113  | 0.334955  |
| Mus_musc Mus_musc | 2.82989  | 3.581033 | 2.235558 | 3.269855 | 2.242349 | 3.830336  |
| ENSMUSG Dnajc16   | 6.288532 | 5.725807 | 5.065495 | 5.410491 | 5.848949 | 5.162348  |
| ENSMUSG Apobec2   | 0.168566 | 0.711779 | 0.175479 | 0.440555 | 0.214302 | 0.216743  |
| ENSMUSG Slco4c1   | 8.391612 | 9.442183 | 6.675698 | 15.76232 | 15.79315 | 17.982927 |
| ENSMUSG Abcb11    | 0        | 0        | 0        | 0        | 0        | 0         |
| ENSMUSG Col16a1   | 8.726165 | 7.003658 | 8.411667 | 6.757588 | 6.400027 | 7.243578  |
| ENSMUSG Ghsh      | 0        | 0        | 0        | 0        | 0        | 0.010886  |
| ENSMUSG Limd2     | 31.15004 | 28.17245 | 31.91229 | 31.36463 | 28.19976 | 30.309692 |
| ENSMUSG Stc1      | 2.97638  | 2.993276 | 2.204341 | 1.270314 | 1.017266 | 1.149178  |
| ENSMUSG Dcpp3     | 0        | 0        | 0        | 0        | 0        | 0         |
| Mus_musc Mus_musc | 0.589077 | 0.667953 | 0.535309 | 0.435272 | 0.528481 | 0.570399  |
| Mus_musc Mus_musc | 0        | 0        | 0        | 0.007641 | 0        | 0.104041  |
| Mus_musc Mus_musc | 0.97667  | 0.911297 | 0.745284 | 0.414434 | 0.431956 | 0.496976  |
| ENSMUSG Ssbp2     | 6.804299 | 7.45299  | 5.625716 | 5.309781 | 4.97316  | 4.829454  |
| Mus_musc Mus_musc | 3.2602   | 3.26221  | 2.79653  | 1.723794 | 1.640562 | 1.567426  |
| Mus_musc Mus_musc | 2.659782 | 1.812012 | 0.654958 | 1.355146 | 1.157326 | 2.242787  |
| Mus_musc Mus_musc | 0        | 0.072011 | 0.337872 | 0.237481 | 0        | 0         |
| Mus_musc Mus_musc | 0        | 0        | 0        | 0        | 0        | 0.074552  |
| Mus_musc Mus_musc | 0.47938  | 0.174978 | 0.190278 | 0.440043 | 0.398391 | 0.673299  |
| ENSMUSG Gm11549   | 0        | 0        | 0        | 0        | 0.0326   | 0         |
| ENSMUSG Srpr      | 60.70517 | 59.92133 | 60.98959 | 54.16481 | 59.88758 | 59.337471 |
| Mus_musc Mus_musc | 0.112859 | 0.04853  | 0.111483 | 0        | 0.232072 | 0.379043  |
| ENSMUSG Timm8b    | 24.15776 | 24.24736 | 32.70276 | 33.26287 | 31.36576 | 35.320171 |
| ENSMUSG Hes7      | 0.38732  | 0.075931 | 0.148838 | 0.046663 | 0.120282 | 0.224352  |
| Mus_musc Mus_musc | 0        | 0        | 0.169385 | 1.131086 | 1.148712 | 0.284602  |
| ENSMUSG Ccdc93    | 4.773676 | 5.319442 | 5.309865 | 4.611502 | 5.640862 | 5.503373  |
| Mus_musc Mus_musc | 0        | 0        | 0        | 1.432872 | 1.379474 | 1.052593  |
| ENSMUSG Cdh7      | 0        | 0        | 0        | 0        | 0        | 0         |
| ENSMUSG Hdac4     | 6.648313 | 6.585853 | 6.01389  | 4.35772  | 4.672148 | 4.926192  |
| ENSMUSG Asb1      | 6.552661 | 5.985336 | 7.100445 | 4.754701 | 5.283812 | 4.989631  |
| ENSMUSG Cln8      | 3.832042 | 3.809641 | 3.816463 | 5.368199 | 5.33361  | 5.580073  |
| ENSMUSG Serpinb8  | 1.969159 | 2.263405 | 1.975716 | 2.364001 | 3.136052 | 2.268173  |
| ENSMUSG Relch     | 7.830631 | 8.140588 | 7.42501  | 7.34953  | 7.604326 | 7.204234  |
| ENSMUSG Srfbp1    | 5.970223 | 6.830163 | 7.161946 | 6.394886 | 6.798511 | 6.209896  |
| ENSMUSG Gm20747   | 0        | 0        | 0        | 0        | 0        | 0         |
| ENSMUSG Btdb35f5  | 0        | 0        | 0        | 0        | 0        | 0         |
| ENSMUSG Rnaset2b  | 23.67915 | 26.39499 | 22.91508 | 33.62329 | 33.43901 | 39.523922 |
| ENSMUSG Olfr1462  | 0        | 0        | 0        | 0        | 0        | 0         |
| ENSMUSG Bin2      | 10.43718 | 8.596223 | 16.87785 | 20.15964 | 15.50601 | 18.062872 |
| Mus_musc Mus_musc | 0.422193 | 0.125719 | 0.201307 | 0.931216 | 1.004332 | 1.116988  |
| Mus_musc Mus_musc | 0.045161 | 0.507674 | 0.140111 | 0.393868 | 0.174414 | 0.522349  |



|                   |          |          |          |          |          |           |
|-------------------|----------|----------|----------|----------|----------|-----------|
| ENSMUSG Mrgpra2a  | 0.088153 | 0.316417 | 0.360194 | 0.114794 | 0.033323 | 0.040155  |
| Mus_musc Mus_musc | 0.850853 | 0.571962 | 0.55148  | 0.462727 | 0        | 0.336674  |
| Mus_musc Mus_musc | 0.137381 | 0        | 0.183274 | 0        | 0        | 0         |
| ENSMUSG Gm2237    | 0.164055 | 0.098935 | 0.150749 | 0.19046  | 0.147835 | 0.113861  |
| ENSMUSG Mup8      | 0        | 0        | 0        | 0        | 0        | 0         |
| ENSMUSG Fbln2     | 4.60123  | 3.115842 | 2.729393 | 2.288647 | 2.074737 | 3.441334  |
| ENSMUSG Olfr1202  | 0        | 0        | 0        | 0        | 0        | 0         |
| ENSMUSG Narfl     | 7.768521 | 6.336365 | 7.757615 | 7.36745  | 7.903258 | 7.852048  |
| ENSMUSG Angptl4   | 7.554441 | 12.20371 | 8.774122 | 3.619515 | 10.59919 | 6.554304  |
| Mus_musc Mus_musc | 0        | 0        | 0        | 0        | 0        | 0         |
| ENSMUSG Gtf3a     | 16.18121 | 12.33897 | 14.87201 | 12.45688 | 13.68895 | 17.67076  |
| Mus_musc Mus_musc | 0        | 0        | 0        | 0.290027 | 0        | 0         |
| Mus_musc Mus_musc | 0        | 0.315718 | 0.068275 | 0        | 0.125751 | 0.082371  |
| Mus_musc Mus_musc | 0        | 0        | 0        | 0.114916 | 0        | 0.129017  |
| Mus_musc Mus_musc | 0        | 0        | 0        | 0        | 0.129037 | 0.30472   |
| Mus_musc Mus_musc | 0        | 0        | 0        | 0.174016 | 0        | 0         |
| ENSMUSG Gm10912   | 0        | 0.027499 | 0.044751 | 0        | 0        | 0.020182  |
| Mus_musc Mus_musc | 0        | 0        | 0        | 0.177841 | 0        | 0         |
| Mus_musc Mus_musc | 0.531753 | 0        | 0.132663 | 0        | 0.278545 | 0.506144  |
| ENSMUSG Olfr156   | 0        | 0        | 0        | 0        | 0        | 0         |
| Mus_musc Mus_musc | 0.115026 | 0        | 0.153682 | 0        | 0        | 0.041577  |
| ENSMUSG Kmt5c     | 9.189038 | 9.596126 | 11.31296 | 10.12128 | 10.77462 | 10.297656 |
| Mus_musc Mus_musc | 0        | 0        | 0        | 0        | 0        | 0         |
| ENSMUSG Sh2d4a    | 13.61585 | 12.17906 | 12.83049 | 8.730068 | 8.855805 | 10.415763 |
| ENSMUSG Elmo2     | 20.74654 | 22.31045 | 25.0161  | 22.57744 | 23.20554 | 24.939019 |
| ENSMUSG Wsb1      | 20.46492 | 19.42061 | 26.03233 | 22.42524 | 17.9801  | 21.101231 |
| ENSMUSG Ttpal     | 8.895457 | 7.791886 | 7.284593 | 8.395768 | 11.11336 | 8.286681  |
| ENSMUSG Ribc2     | 0.255538 | 0.126471 | 0.060349 | 0.189661 | 0.390113 | 0.247012  |
| ENSMUSG Ifnab     | 0        | 0        | 0        | 0        | 0        | 0         |
| Mus_musc Mus_musc | 0.109556 | 0.156987 | 0.300845 | 0.01033  | 0        | 0         |
| ENSMUSG Def8      | 7.891337 | 7.98294  | 7.368429 | 8.146355 | 7.959842 | 8.746812  |
| ENSMUSG Tex13c1   | 0        | 0        | 0        | 0        | 0        | 0         |
| ENSMUSG Btdb35f14 | 0        | 0        | 0        | 0        | 0        | 0         |
| ENSMUSG Rnf133    | 0.025673 | 0.027551 | 0        | 0.019582 | 0.042016 | 0.030398  |
| ENSMUSG Olfr632   | 0        | 0        | 0        | 0        | 0        | 0         |
| ENSMUSG Olfr371   | 0        | 0        | 0        | 0        | 0        | 0         |
| ENSMUSG Ndufs8    | 38.92339 | 33.25501 | 42.09047 | 36.82429 | 37.43103 | 40.694721 |
| ENSMUSG B3glct    | 3.081494 | 3.083045 | 2.707026 | 2.778851 | 3.165763 | 3.351384  |
| ENSMUSG Xkr4      | 0.260471 | 0.126793 | 0.140951 | 0.0804   | 0.167684 | 0.09554   |
| ENSMUSG Gm2035    | 0        | 0        | 0        | 0        | 0        | 0         |
| ENSMUSG Atg4d     | 6.374361 | 7.061456 | 7.21746  | 6.663545 | 6.740502 | 6.692483  |
| ENSMUSG Qtrt1     | 4.278943 | 3.492298 | 3.535849 | 5.133813 | 4.030333 | 4.483278  |
| ENSMUSG B020011L1 | 0        | 0        | 0        | 0        | 0        | 0         |
| ENSMUSG Gm7358    | 0        | 0        | 0        | 0        | 0        | 0         |
| ENSMUSG Eci2      | 36.33534 | 36.44699 | 30.87543 | 29.25645 | 29.66454 | 26.507727 |
| Mus_musc Mus_musc | 0.044134 | 0.296658 | 0.041681 | 0.300729 | 0.23092  | 0.082844  |
| ENSMUSG Pxdc1     | 80.70533 | 67.56911 | 64.01025 | 30.33845 | 40.17647 | 33.552293 |
| ENSMUSG Osbp15    | 35.72378 | 33.84742 | 31.75013 | 24.94217 | 24.93816 | 24.461472 |
| ENSMUSG Adgrl3    | 14.68113 | 15.27519 | 15.30051 | 8.366925 | 9.653727 | 7.850955  |
| ENSMUSG Gm5519    | 0        | 0.134005 | 0        | 0        | 0        | 0         |
| ENSMUSG Kdf1      | 6.034783 | 6.733152 | 6.682387 | 5.116039 | 5.115971 | 4.939076  |
| ENSMUSG Nme1      | 6.162378 | 6.16093  | 8.377088 | 10.43449 | 10.43456 | 10.101214 |
| ENSMUSG Bclaf1    | 24.49114 | 25.27868 | 25.01995 | 24.3766  | 22.13707 | 22.432533 |
| ENSMUSG Slx4      | 5.881546 | 7.020335 | 5.452835 | 6.860179 | 6.673549 | 6.74216   |
| ENSMUSG Fnbp1l    | 44.50246 | 45.05871 | 46.63137 | 30.82134 | 30.89483 | 28.747943 |
| ENSMUSG Prkrip1   | 3.545294 | 3.604229 | 3.358674 | 2.845437 | 2.734619 | 3.042969  |
| ENSMUSG Gm14025   | 0.046631 | 0.041578 | 0        | 0        | 0.058886 | 0.032565  |
| ENSMUSG Slc8a3    | 0.162233 | 0.164895 | 0.206721 | 0.114892 | 0.045091 | 0.047028  |
| ENSMUSG Cyp4v3    | 13.63808 | 13.34729 | 13.35423 | 14.67683 | 14.52458 | 16.073008 |
| ENSMUSG Kcnp3     | 1.583327 | 1.475263 | 1.345522 | 0.512002 | 0.99398  | 0.407872  |
| ENSMUSG Adam34    | 0        | 0        | 0        | 0        | 0        | 0         |
| ENSMUSG Ttc9      | 3.508256 | 4.859453 | 3.323911 | 3.770857 | 3.728655 | 3.712058  |
| ENSMUSG Serping1  | 128.8061 | 136.0063 | 142.3327 | 112.2667 | 117.0057 | 115.46022 |
| ENSMUSG Anp32e    | 33.16931 | 33.51705 | 36.4421  | 27.50179 | 32.89851 | 27.88427  |

|                   |          |          |          |          |          |           |
|-------------------|----------|----------|----------|----------|----------|-----------|
| ENSMUSG Prpf3     | 8.066864 | 9.629515 | 9.640914 | 6.904857 | 7.496494 | 7.924643  |
| ENSMUSG Vps45     | 4.421735 | 4.984291 | 4.288744 | 5.033249 | 4.96933  | 5.320098  |
| ENSMUSG Plekho1   | 36.68778 | 30.50744 | 44.18308 | 46.27294 | 44.34853 | 47.510784 |
| ENSMUSG Olfr1416  | 0        | 0        | 0        | 0        | 0        | 0         |
| ENSMUSG Nsd3      | 17.50374 | 15.39376 | 14.67764 | 17.05292 | 15.59064 | 16.351579 |
| ENSMUSG Cyp2c50   | 0        | 0        | 0        | 0        | 0        | 0         |
| ENSMUSG Uprt      | 3.235952 | 3.640935 | 2.979113 | 3.730018 | 4.027944 | 4.091189  |
| ENSMUSG Fnd3c2    | 0        | 0        | 0        | 0        | 0        | 0         |
| ENSMUSG Gm5127    | 0.571727 | 0.077709 | 0.062943 | 0.125246 | 0.175856 | 0.254745  |
| ENSMUSG Slc25a2   | 0.137624 | 0.033815 | 0.131916 | 0        | 0.1601   | 0.01601   |
| ENSMUSG Eri1      | 5.679874 | 4.841769 | 5.176634 | 6.006737 | 6.542947 | 5.901846  |
| ENSMUSG Aga       | 16.65995 | 16.16289 | 17.38714 | 18.10725 | 18.5782  | 18.711175 |
| ENSMUSG Vegfc     | 4.288637 | 4.410511 | 4.458977 | 2.683927 | 3.152958 | 2.96864   |
| ENSMUSG Dlc1      | 60.51019 | 55.88796 | 50.60315 | 34.83468 | 34.58243 | 34.408604 |
| ENSMUSG Itih5     | 2.020053 | 1.907302 | 1.132535 | 0.99361  | 1.166236 | 0.723456  |
| ENSMUSG Tnks      | 10.81039 | 10.66094 | 9.238958 | 8.728204 | 8.167003 | 8.704363  |
| ENSMUSG Vmn2r60   | 0        | 0        | 0        | 0        | 0        | 0         |
| ENSMUSG Ttll5     | 4.097846 | 4.38371  | 3.756351 | 3.715267 | 4.546358 | 4.905796  |
| ENSMUSG Gm7697    | 0        | 0        | 0        | 0        | 0        | 0         |
| Mus_musc Mus_musc | 0        | 0.154309 | 0        | 0        | 0        | 0         |
| ENSMUSG Unc13c    | 0.012826 | 0.035034 | 0.026351 | 0        | 0.028802 | 0.032457  |
| ENSMUSG Tex33     | 0        | 0        | 0        | 0        | 0        | 0         |
| ENSMUSG Ifnlr1    | 4.97393  | 4.665586 | 4.658024 | 3.594586 | 3.251625 | 3.477344  |
| ENSMUSG 5730596B  | 0.338501 | 0.343998 | 0.529726 | 0.316729 | 0.176896 | 0.251787  |
| ENSMUSG Ajuba     | 18.99    | 16.03454 | 18.01617 | 10.77243 | 11.80877 | 11.475475 |
| ENSMUSG 4931414P  | 2.476663 | 2.868794 | 2.456851 | 2.646936 | 2.887054 | 2.690188  |
| ENSMUSG Pdha1     | 48.30833 | 51.21329 | 44.08338 | 42.88942 | 45.22723 | 41.462421 |
| ENSMUSG Adgrg2    | 0.563799 | 0.763277 | 0.818837 | 0.496952 | 0.878498 | 0.454056  |
| ENSMUSG Slc7a3    | 0.090187 | 0.223777 | 0.017876 | 0.211097 | 0.157636 | 0.114932  |
| ENSMUSG Phka2     | 3.81493  | 3.725322 | 4.150128 | 4.308898 | 5.180086 | 6.044107  |
| ENSMUSG Rs1       | 0.002511 | 0.030545 | 0.038907 | 0.008343 | 0.00796  | 0.009462  |
| ENSMUSG Cdkl5     | 11.50754 | 11.55921 | 9.461492 | 6.262198 | 6.783562 | 7.556793  |
| ENSMUSG Dad1      | 55.36528 | 60.57776 | 62.76071 | 64.54863 | 58.00426 | 63.796271 |
| ENSMUSG Lrch2     | 1.10477  | 0.813723 | 0.615471 | 0.725273 | 0.980637 | 1.115815  |
| Mus_musc Mus_musc | 0        | 0        | 0        | 0        | 0.380635 | 0.078681  |
| ENSMUSG Gm17334   | 0.524333 | 0.714095 | 1.158574 | 1.106209 | 0.334647 | 0.388326  |
| Mus_musc Mus_musc | 0        | 0.198655 | 0        | 0        | 0        | 0         |
| ENSMUSG Mphosph9  | 2.272033 | 2.525435 | 2.106376 | 2.168825 | 2.290009 | 2.313885  |
| ENSMUSG Ccdc50    | 19.7169  | 20.2253  | 17.5657  | 17.92475 | 17.54064 | 18.863534 |
| ENSMUSG Tbc1d32   | 2.459822 | 2.577711 | 1.515817 | 2.284166 | 2.029828 | 2.10359   |
| Mus_musc Mus_musc | 0        | 0.05319  | 0.07423  | 0.452014 | 0.072485 | 0         |
| ENSMUSG Fam210a   | 4.94755  | 5.036749 | 4.151842 | 4.477651 | 4.793804 | 4.446725  |
| ENSMUSG Zscan4-ps | 0        | 0        | 0        | 0        | 0        | 0         |
| ENSMUSG Camk4     | 0.522329 | 0.623428 | 0.485668 | 0.612227 | 0.906526 | 0.660976  |
| ENSMUSG Pde2a     | 1.233275 | 1.211243 | 2.427375 | 0.368712 | 4.237047 | 2.026714  |
| ENSMUSG CT030732  | 0        | 0        | 0        | 0.28649  | 0.084239 | 0         |
| ENSMUSG AL607142  | 8.10E-05 | 0        | 0.00014  | 7.40E-05 | 0        | 0         |
| ENSMUSG Camta1    | 4.646136 | 5.823017 | 4.604153 | 4.676382 | 3.321584 | 3.692607  |
| ENSMUSG Csf1      | 15.5942  | 13.15657 | 21.13252 | 17.19464 | 15.28323 | 17.258865 |
| ENSMUSG Cep170b   | 18.87467 | 17.90357 | 15.38551 | 12.56074 | 13.14015 | 12.961577 |
| ENSMUSG Gm6351    | 0        | 0        | 0        | 0        | 0        | 0         |
| ENSMUSG BC061212  | 0        | 0        | 0        | 0        | 0        | 0         |
| ENSMUSG Tjap1     | 11.41122 | 9.540324 | 9.657712 | 8.446274 | 8.607808 | 7.508436  |
| ENSMUSG Sbd5      | 81.30592 | 79.7855  | 91.11436 | 57.67663 | 60.36995 | 55.317715 |
| ENSMUSG Padi4     | 1.022644 | 1.182172 | 1.02558  | 1.314889 | 1.406359 | 1.695094  |
| ENSMUSG Gpr143    | 0.031536 | 0.080463 | 0        | 0.032916 | 0        | 0         |
| ENSMUSG Kdm5c     | 15.75561 | 14.56287 | 14.86505 | 15.06005 | 14.95188 | 14.373996 |
| Mus_musc Mus_musc | 0        | 0.132993 | 0        | 0        | 0        | 0         |
| Mus_musc Mus_musc | 0        | 0        | 0        | 0.233261 | 0        | 0.167132  |
| Mus_musc Mus_musc | 0.32     | 0        | 0.123763 | 0.341324 | 0.064618 | 0.095366  |
| Mus_musc Mus_musc | 0        | 0        | 0        | 0.373085 | 0        | 0.099618  |
| Mus_musc Mus_musc | 0        | 0        | 0        | 0.224395 | 0.229193 | 0.28184   |
| Mus_musc Mus_musc | 0.188031 | 0        | 0.095833 | 0        | 0        | 0         |
| Mus_musc Mus_musc | 0.170431 | 0.188426 | 0.138098 | 0.330334 | 0.488448 | 0.651684  |

|                   |          |          |          |          |          |           |
|-------------------|----------|----------|----------|----------|----------|-----------|
| Mus_musc Mus_musc | 0.584619 | 0.854012 | 0.760025 | 0.400278 | 0.741283 | 0.112357  |
| ENSMUSG Fnip1     | 9.969707 | 11.76094 | 11.32801 | 11.46224 | 9.736749 | 10.374396 |
| ENSMUSG Gm12166   | 2.070308 | 1.526985 | 2.32058  | 2.516695 | 2.31631  | 1.640949  |
| ENSMUSG Atxn1l    | 15.1911  | 15.16527 | 15.23419 | 13.07213 | 12.69035 | 11.745671 |
| ENSMUSG Olfr1458  | 0        | 0        | 0        | 0        | 0        | 0         |
| ENSMUSG 9930111J2 | 10.72153 | 9.836857 | 10.93629 | 15.70259 | 11.48131 | 12.154524 |
| ENSMUSG 9930111J2 | 9.585069 | 8.380186 | 9.533154 | 15.37832 | 10.95248 | 11.43818  |
| ENSMUSG Bcar3     | 33.78739 | 28.85457 | 25.77208 | 18.96529 | 20.65114 | 20.648634 |
| ENSMUSG Abcd3     | 45.09571 | 41.78358 | 38.94504 | 41.05451 | 42.1332  | 46.153091 |
| ENSMUSG Pip5k1a   | 12.26308 | 13.17503 | 11.59567 | 9.779204 | 10.39492 | 10.406262 |
| ENSMUSG Abca4     | 2.205073 | 2.342797 | 1.718656 | 1.477752 | 1.365944 | 1.741838  |
| ENSMUSG Gclm      | 7.878471 | 7.2901   | 6.576382 | 6.078175 | 6.307639 | 5.619432  |
| ENSMUSG F3        | 33.16394 | 28.91816 | 28.9613  | 23.63761 | 29.33089 | 22.608715 |
| ENSMUSG Spdye4a   | 0        | 0        | 0        | 0        | 0        | 0         |
| ENSMUSG Cybc1     | 17.5003  | 18.6449  | 22.65669 | 20.87303 | 19.8726  | 21.205793 |
| ENSMUSG Cdk5rap2  | 31.00793 | 30.25531 | 33.87757 | 28.06498 | 27.61803 | 28.131295 |
| ENSMUSG Armc2     | 0.493784 | 0.982107 | 0.585367 | 0.811994 | 0.962831 | 0.626556  |
| ENSMUSG Tcp10a    | 0        | 0.025927 | 0        | 0        | 0        | 0         |
| ENSMUSG Pex12     | 3.773509 | 3.759633 | 3.336585 | 2.822786 | 3.117398 | 3.94678   |
| ENSMUSG Ndel1     | 30.96685 | 29.69681 | 30.47841 | 24.08359 | 25.64569 | 27.821622 |
| ENSMUSG Bmp5      | 15.42069 | 15.89145 | 13.65799 | 11.15522 | 11.15098 | 10.962961 |
| ENSMUSG Ilf3      | 13.31385 | 14.36194 | 13.80788 | 14.18542 | 14.74093 | 13.562832 |
| ENSMUSG Pde4a     | 3.937935 | 3.196719 | 3.857711 | 2.973644 | 3.296491 | 3.108508  |
| ENSMUSG Tyk2      | 10.92274 | 10.23203 | 12.02268 | 12.95207 | 13.33228 | 14.305854 |
| ENSMUSG Icam5     | 0.24067  | 0.168604 | 0.125197 | 0.374663 | 0.268477 | 0.153812  |
| ENSMUSG Olfm2     | 3.681894 | 2.172128 | 2.988624 | 1.317753 | 0.980474 | 1.287651  |
| ENSMUSG Pin1      | 6.675385 | 7.729035 | 7.828628 | 6.964226 | 6.069688 | 7.905127  |
| ENSMUSG Mfap2     | 48.89603 | 48.20337 | 49.47856 | 28.07312 | 26.49932 | 24.389488 |
| ENSMUSG Fhit      | 1.082523 | 0.985539 | 0.440055 | 1.625521 | 0.933826 | 1.956259  |
| ENSMUSG AC133488  | 0        | 0        | 0        | 0        | 0        | 0         |
| ENSMUSG Gstm6     | 2.589001 | 3.058788 | 1.67212  | 2.247663 | 1.370817 | 1.998005  |
| ENSMUSG Fbxl21    | 0.701398 | 0.404659 | 0.474055 | 0.387086 | 0.383379 | 0.444044  |
| ENSMUSG Ptptr     | 0.138772 | 0.220582 | 0.156076 | 0.294283 | 0.414985 | 0.345748  |
| ENSMUSG Olfr352   | 0        | 0        | 0        | 0        | 0        | 0         |
| ENSMUSG Uqcrb     | 61.76057 | 58.16862 | 61.10199 | 65.62247 | 53.76898 | 62.236866 |
| ENSMUSG Gm20870   | 0        | 0        | 0        | 0        | 0        | 0         |
| ENSMUSG Pdzm4     | 0.060441 | 0.029847 | 0.028873 | 0.068658 | 0.032737 | 0.109017  |
| ENSMUSG Leap2     | 0.408641 | 0.159831 | 0.063629 | 0.107439 | 0.189505 | 0         |
| ENSMUSG Znrd1as   | 4.733678 | 4.925087 | 5.123913 | 3.952519 | 4.192893 | 3.407107  |
| ENSMUSG Hist1h1t  | 0        | 0        | 0.046124 | 0.124216 | 0        | 0         |
| ENSMUSG Atp5o     | 67.80258 | 82.00826 | 80.64091 | 79.36204 | 84.95908 | 95.682663 |
| ENSMUSG Itsn1     | 10.06335 | 11.30021 | 10.01598 | 11.83987 | 13.52199 | 13.086141 |
| ENSMUSG Rcan1     | 15.54086 | 16.14348 | 17.53979 | 14.24198 | 14.4475  | 15.549776 |
| ENSMUSG Runx1     | 9.365657 | 10.05575 | 7.872896 | 9.751782 | 9.778495 | 10.224471 |
| ENSMUSG Wfdc6b    | 0.999781 | 0.956749 | 1.236547 | 0.886958 | 0.698389 | 0.464397  |
| ENSMUSG Wfdc16    | 0.346578 | 0.251513 | 0.080835 | 0.193663 | 0.179499 | 0         |
| ENSMUSG Wfdc8     | 0.148231 | 0.101725 | 0        | 0.098144 | 0.039252 | 0         |
| ENSMUSG Ccdc190   | 0.194114 | 0.150387 | 0.073586 | 0.261276 | 0.157249 | 0.152793  |
| ENSMUSG Dut       | 4.558591 | 4.206285 | 4.751653 | 5.607509 | 6.709109 | 6.978651  |
| ENSMUSG Slc12a1   | 0        | 0.050753 | 0.051429 | 0        | 0        | 0         |
| ENSMUSG Myef2     | 8.10845  | 8.628216 | 8.382279 | 7.557629 | 7.16048  | 7.379048  |
| ENSMUSG Sema6d    | 18.34185 | 15.97755 | 15.80865 | 8.519816 | 9.716294 | 9.880297  |
| ENSMUSG Galk2     | 12.13044 | 11.98112 | 10.45104 | 14.32272 | 15.50996 | 15.803953 |
| ENSMUSG Cops2     | 26.87595 | 28.49838 | 26.76955 | 27.41439 | 27.29624 | 25.727937 |
| ENSMUSG Fbn1      | 5.995842 | 5.497466 | 5.840149 | 7.856546 | 7.668677 | 9.864822  |
| ENSMUSG Fam227b   | 0        | 0        | 0        | 0        | 0        | 0         |
| ENSMUSG Fgf7      | 8.04864  | 8.07759  | 8.602676 | 5.80321  | 6.499768 | 5.237045  |
| ENSMUSG Atp1a3    | 2.409029 | 1.623739 | 2.56632  | 15.06127 | 13.63165 | 17.87328  |
| ENSMUSG Gm21988   | 38.08913 | 38.65089 | 38.46625 | 38.23477 | 33.71056 | 32.998248 |
| ENSMUSG Kcnk18    | 0        | 0        | 0        | 0        | 0        | 0         |
| ENSMUSG Sike1     | 10.43762 | 9.17916  | 9.25848  | 7.834547 | 8.036704 | 7.298466  |
| ENSMUSG Car7      | 0.284515 | 0.286064 | 0.441121 | 0.413501 | 0.312365 | 0.422406  |
| ENSMUSG Rrad      | 6.353722 | 4.48328  | 7.127719 | 7.804016 | 6.044998 | 7.498172  |
| ENSMUSG Cdh16     | 5.71744  | 6.008288 | 6.253775 | 3.804936 | 3.36331  | 3.981498  |

|                   |          |          |          |          |          |           |
|-------------------|----------|----------|----------|----------|----------|-----------|
| ENSMUSG Ces2e     | 2.368799 | 2.282971 | 1.715334 | 1.118143 | 0.921703 | 1.162106  |
| ENSMUSG Tradd     | 8.53695  | 8.927052 | 9.288788 | 10.33907 | 8.4247   | 10.06743  |
| ENSMUSG Cbfb      | 21.06252 | 21.37576 | 22.17786 | 20.79254 | 21.23107 | 21.323526 |
| ENSMUSG Srm       | 7.149972 | 6.400318 | 8.086335 | 11.03046 | 10.86004 | 11.963502 |
| ENSMUSG D230025D  | 30.28723 | 36.86948 | 29.26211 | 27.28696 | 27.80803 | 26.879433 |
| ENSMUSG Epha2     | 22.87223 | 20.40333 | 25.86913 | 11.71994 | 11.27282 | 14.100558 |
| ENSMUSG Polr2g    | 23.89608 | 25.48472 | 29.70367 | 27.30846 | 25.39005 | 27.41309  |
| ENSMUSG Ttc9c     | 9.706486 | 9.66051  | 10.27065 | 9.962562 | 10.48513 | 11.882042 |
| ENSMUSG Zbtb3     | 1.068152 | 1.107042 | 1.304971 | 1.059204 | 1.394006 | 1.135318  |
| ENSMUSG Foxr2     | 0.017573 | 0.025478 | 0.031577 | 0        | 0        | 0         |
| ENSMUSG Snx29     | 6.389306 | 6.248899 | 5.356454 | 6.547426 | 7.231111 | 8.152093  |
| ENSMUSG 5730409E  | 5.317461 | 5.51567  | 5.791989 | 4.989684 | 4.446311 | 5.043992  |
| ENSMUSG Zfp972    | 0.204126 | 0.354915 | 0.312978 | 0.372735 | 0        | 0.207661  |
| ENSMUSG Gm10570   | 0        | 0.118323 | 0.062967 | 0        | 0.076424 | 0.135868  |
| ENSMUSG Teddm1b   | 0        | 0        | 0        | 0        | 0        | 0.019534  |
| ENSMUSG Gm14327   | 0.371425 | 0.688677 | 0.590469 | 0.438251 | 0.340961 | 0.237203  |
| ENSMUSG Sh3d21    | 13.5835  | 13.0095  | 11.25688 | 6.829985 | 7.983221 | 7.138164  |
| ENSMUSG Gm14296   | 1.597146 | 1.587388 | 1.387748 | 0.749756 | 1.281592 | 0.788679  |
| ENSMUSG Ccs       | 18.79277 | 17.77732 | 17.39212 | 18.34623 | 16.60414 | 19.871292 |
| ENSMUSG Golim4    | 19.67153 | 19.40744 | 19.81357 | 16.12128 | 15.78791 | 15.768089 |
| ENSMUSG Tldc1     | 3.37256  | 4.438627 | 3.114512 | 4.162552 | 4.182861 | 3.694693  |
| ENSMUSG Ano7      | 0.058382 | 0.020915 | 0.048108 | 0.438886 | 0.104452 | 0.124594  |
| ENSMUSG Ctnnd1    | 102.5849 | 98.53935 | 88.66766 | 66.88547 | 74.57189 | 66.674081 |
| Mus_musc Mus_musc | 0        | 0        | 0        | 0.262822 | 0.086017 | 0.275518  |
| ENSMUSG Kctd20    | 25.39293 | 24.68903 | 23.95973 | 21.21274 | 21.72899 | 21.430424 |
| ENSMUSG Gm5965    | 0        | 0        | 0        | 0        | 0        | 0         |
| ENSMUSG Aff1      | 24.26801 | 22.84316 | 20.13877 | 19.39094 | 19.89192 | 20.092562 |
| ENSMUSG Kih18     | 3.614055 | 3.826343 | 3.744211 | 2.729977 | 3.288721 | 3.257495  |
| ENSMUSG Hsd17b11  | 66.64471 | 65.66694 | 63.35637 | 53.22947 | 54.17742 | 53.144052 |
| ENSMUSG Nudt9     | 27.11746 | 26.51886 | 26.3634  | 26.58565 | 25.39567 | 27.216552 |
| ENSMUSG Gpat3     | 3.446807 | 2.992775 | 3.418636 | 2.164677 | 2.113106 | 2.187009  |
| ENSMUSG Mpnd      | 17.49904 | 14.6924  | 16.72065 | 17.02218 | 17.69603 | 20.985837 |
| ENSMUSG Zfp959    | 5.89361  | 4.802812 | 5.747212 | 4.030486 | 4.767257 | 3.869526  |
| ENSMUSG Gm43064   | 0.045793 | 0.029994 | 0.039495 | 0.201987 | 0.087242 | 0         |
| ENSMUSG Bcl2l12   | 7.92033  | 5.87705  | 6.791836 | 7.098118 | 6.008994 | 5.799526  |
| ENSMUSG Olfr27    | 0        | 0        | 0        | 0        | 0        | 0         |
| ENSMUSG Nlrp10    | 0.229779 | 0.350245 | 0.208132 | 0.507058 | 0.515062 | 0.76353   |
| Mus_musc Mus_musc | 0        | 0.187008 | 0.339572 | 0        | 0        | 0.100772  |
| Mus_musc Mus_musc | 0.047684 | 0.196344 | 0        | 0.597797 | 0.230132 | 0         |
| Mus_musc Mus_musc | 0        | 0        | 0.189108 | 0        | 0        | 0         |
| Mus_musc Mus_musc | 0.164471 | 0        | 0        | 0.165211 | 0        | 0.116281  |
| Mus_musc Mus_musc | 0        | 0        | 0.149703 | 0        | 0        | 0         |
| Mus_musc Mus_musc | 0        | 0        | 0.208842 | 0        | 0        | 0         |
| ENSMUSG Prr30     | 0        | 0        | 0        | 0        | 0        | 0         |
| Mus_musc Mus_musc | 0        | 0.156095 | 0        | 0.142999 | 0        | 0         |
| ENSMUSG Lrrc8a    | 18.97431 | 18.48077 | 18.80009 | 11.80753 | 13.4604  | 12.584168 |
| ENSMUSG Hilpda    | 98.71766 | 80.93962 | 118.6898 | 46.73652 | 52.88068 | 54.732746 |
| ENSMUSG Eif3j2    | 11.86645 | 11.25005 | 12.4744  | 12.30797 | 10.38077 | 11.110906 |
| ENSMUSG Kcnk6     | 5.382469 | 5.449868 | 5.831189 | 7.628162 | 7.901315 | 9.522573  |
| ENSMUSG Ccdc185   | 0        | 0        | 0        | 0        | 0        | 0         |
| ENSMUSG Relt      | 2.100107 | 1.901406 | 3.83296  | 4.515081 | 3.756341 | 4.862122  |
| ENSMUSG Rai14     | 24.99006 | 25.63243 | 23.33549 | 18.94193 | 19.14588 | 19.68053  |
| ENSMUSG Rufy3     | 4.11378  | 4.203744 | 4.701687 | 7.001169 | 6.206444 | 6.150363  |
| Mus_musc Mus_musc | 0.114688 | 0.125492 | 0.135352 | 0        | 0        | 0.481547  |
| Mus_musc Mus_musc | 0.609035 | 1.066391 | 0.589949 | 0.577583 | 0.981697 | 0.608591  |
| Mus_musc Mus_musc | 0.840115 | 0.759934 | 0.567552 | 1.669517 | 0.869239 | 1.305007  |
| Mus_musc Mus_musc | 0.759298 | 0.514108 | 0.637643 | 0.441822 | 0.212699 | 0.598376  |
| Mus_musc Mus_musc | 0.044903 | 0        | 0        | 0        | 0        | 0.103089  |
| Mus_musc Mus_musc | 0.289733 | 0.917803 | 1.037378 | 0.783775 | 0.388485 | 0.952746  |
| Mus_musc Mus_musc | 0.252166 | 0.361849 | 0.254059 | 0.414806 | 0        | 0.21417   |
| ENSMUSG Dym       | 13.85276 | 13.35181 | 11.61486 | 12.5517  | 12.63611 | 12.098227 |
| ENSMUSG Fbxo45    | 6.001573 | 6.419398 | 6.386344 | 5.469121 | 5.323971 | 5.292655  |
| ENSMUSG Tmem161l  | 3.357519 | 3.42027  | 3.371433 | 3.036513 | 3.33851  | 2.83353   |
| ENSMUSG Cela3a    | 0        | 0        | 0        | 0        | 0        | 0         |

|                   |          |          |          |          |          |           |
|-------------------|----------|----------|----------|----------|----------|-----------|
| ENSMUSG Aunip     | 0        | 0.231766 | 0.080296 | 0.20227  | 0.322136 | 0.348292  |
| ENSMUSG Xylb      | 1.061985 | 1.007636 | 0.884452 | 1.293162 | 1.5298   | 1.22556   |
| ENSMUSG Pigw      | 1.152931 | 1.721933 | 1.733717 | 1.432384 | 1.261481 | 1.782698  |
| ENSMUSG Olfr1255  | 0        | 0        | 0        | 0        | 0        | 0         |
| ENSMUSG Oxgr1     | 0        | 0        | 0        | 0        | 0        | 0         |
| ENSMUSG Cd300c2   | 9.169385 | 8.26868  | 12.70859 | 24.25117 | 15.2112  | 22.242168 |
| ENSMUSG Shb       | 11.78054 | 12.76215 | 11.87492 | 8.658343 | 9.360908 | 10.395487 |
| ENSMUSG Olfr543   | 0.002583 | 0.163732 | 0.014394 | 0        | 0        | 0.036022  |
| ENSMUSG D630023F  | 0        | 0        | 0        | 0        | 0        | 0         |
| ENSMUSG Uxt       | 4.497712 | 5.276671 | 4.781183 | 5.145906 | 5.710865 | 5.815655  |
| ENSMUSG Timp1     | 3.334234 | 4.546096 | 2.703088 | 11.85576 | 21.82854 | 22.305617 |
| ENSMUSG Cnnm3     | 6.80102  | 6.027327 | 6.188198 | 5.307068 | 5.404476 | 4.602744  |
| Mus_musc Mus_musc | 2.650715 | 2.442045 | 1.331244 | 0.290902 | 0.304204 | 0.24826   |
| Mus_musc Mus_musc | 1.57578  | 1.494039 | 1.465413 | 1.074784 | 0.666063 | 0.165929  |
| Mus_musc Mus_musc | 0.341909 | 0.629256 | 0.390475 | 0.688771 | 0.336493 | 0.745936  |
| ENSMUSG Lipo2     | 0.204452 | 0.035307 | 0.015178 | 0.039389 | 0        | 0.11938   |
| ENSMUSG Sox12     | 2.051582 | 2.161924 | 2.379598 | 2.301797 | 1.949181 | 2.027041  |
| Mus_musc Mus_musc | 0        | 0        | 0        | 0        | 0        | 0         |
| Mus_musc Mus_musc | 0        | 0        | 0        | 0        | 0.486894 | 0         |
| ENSMUSG Cox6b2    | 12.8595  | 10.1603  | 10.45008 | 9.277662 | 6.634732 | 8.980273  |
| ENSMUSG Zfp85     | 2.064849 | 2.236555 | 2.50289  | 2.043937 | 1.91069  | 2.098489  |
| ENSMUSG Gm5751    | 0.141165 | 0        | 0.188341 | 0.124241 | 0        | 0.083382  |
| ENSMUSG Ice2      | 3.181369 | 2.872563 | 3.044027 | 2.622139 | 2.217661 | 2.5757    |
| ENSMUSG Gm14862   | 0.055066 | 0        | 0        | 0        | 0        | 0         |
| ENSMUSG Anxa2     | 306.5208 | 313.5048 | 326.5262 | 255.3408 | 265.8229 | 303.84941 |
| ENSMUSG Cgnl1     | 28.91714 | 31.91068 | 23.61066 | 27.61902 | 28.20232 | 29.042651 |
| ENSMUSG Rora      | 7.406647 | 8.09552  | 6.438653 | 4.959465 | 5.214894 | 5.110531  |
| ENSMUSG Rp9       | 24.78665 | 19.0432  | 21.3876  | 21.38366 | 23.81321 | 26.042304 |
| ENSMUSG Gm6592    | 0.053776 | 0        | 0        | 0        | 0        | 0         |
| ENSMUSG Vmn2r93   | 0        | 0        | 0        | 0        | 0        | 0         |
| ENSMUSG Lrp1      | 38.25249 | 34.93338 | 40.73448 | 40.43489 | 44.06436 | 47.240763 |
| ENSMUSG Tmem74b   | 0.066958 | 0.089575 | 0        | 0        | 0        | 0.124374  |
| ENSMUSG Fgfr1op2  | 35.04079 | 36.15762 | 35.04258 | 35.95795 | 32.43264 | 32.278275 |
| Mus_musc Mus_musc | 0.170603 | 0.057944 | 0.055478 | 0.089702 | 0.189757 | 0.054454  |
| ENSMUSG Tbc1d10c  | 6.329001 | 3.861462 | 8.141805 | 11.2333  | 8.593902 | 9.16379   |
| ENSMUSG Sec23ip   | 13.38736 | 13.65289 | 12.71783 | 12.82951 | 12.01173 | 12.673383 |
| ENSMUSG Ubqln2    | 17.1261  | 15.07215 | 13.67701 | 13.17761 | 13.98121 | 13.815291 |
| ENSMUSG 2700062C  | 5.34647  | 4.805712 | 5.982531 | 4.598206 | 4.281868 | 4.945013  |
| ENSMUSG Gira1     | 0        | 0        | 0        | 0        | 0        | 0         |
| ENSMUSG Elp2      | 13.06382 | 12.83607 | 12.52344 | 11.94461 | 12.73227 | 12.893118 |
| ENSMUSG Slc39a6   | 13.78556 | 12.18041 | 13.04538 | 10.3922  | 10.37958 | 10.412383 |
| ENSMUSG Mid2      | 19.90292 | 18.11416 | 19.05594 | 13.07409 | 14.08653 | 12.045383 |
| ENSMUSG Zfp397    | 10.88808 | 11.58183 | 9.988174 | 10.11459 | 9.989849 | 10.790019 |
| ENSMUSG Slc25a44  | 11.22146 | 12.01977 | 11.38429 | 10.76016 | 10.68434 | 12.026862 |
| ENSMUSG Ppp4r1    | 20.98828 | 20.76717 | 21.10349 | 17.14184 | 18.76514 | 17.248056 |
| ENSMUSG Olfr1377  | 0        | 0        | 0        | 0        | 0        | 0         |
| ENSMUSG Ces1e     | 6.401725 | 5.967685 | 5.299823 | 4.822467 | 5.645248 | 4.432388  |
| ENSMUSG Gm14851   | 0        | 0        | 0        | 0        | 0        | 0         |
| ENSMUSG Retsat    | 8.30322  | 8.295621 | 7.560427 | 8.516696 | 9.587605 | 9.905436  |
| ENSMUSG Prdx2     | 47.02812 | 45.871   | 43.63912 | 46.34751 | 50.03823 | 52.153734 |
| Mus_musc Mus_musc | 0        | 0        | 0        | 0.077048 | 0        | 0         |
| Mus_musc Mus_musc | 0        | 0        | 0        | 0.322244 | 0.255018 | 0         |
| ENSMUSG Ier3ip1   | 15.65254 | 15.66875 | 17.29488 | 16.02259 | 14.58301 | 14.874988 |
| Mus_musc Mus_musc | 0.160453 | 0.185583 | 0        | 0        | 0        | 0.483854  |
| Mus_musc Mus_musc | 0        | 0.251591 | 0        | 0        | 0.148136 | 0.136138  |
| Mus_musc Mus_musc | 0.776727 | 0.785788 | 0.759204 | 0.639193 | 0.905792 | 0.644452  |
| Mus_musc Mus_musc | 0.24155  | 0.162324 | 0.105176 | 0.072065 | 0.076409 | 0         |
| Mus_musc Mus_musc | 0        | 0.177224 | 0        | 0.144601 | 0        | 0.0806    |
| ENSMUSG Pde1a     | 1.496668 | 1.262753 | 1.525174 | 0.798071 | 1.065331 | 0.815733  |
| ENSMUSG Six1      | 1.413185 | 1.357233 | 0.620978 | 1.401838 | 1.485319 | 1.355291  |
| ENSMUSG 6030498E  | 0        | 0        | 0        | 0        | 0        | 0         |
| ENSMUSG Olfr589   | 0        | 0        | 0        | 0        | 0        | 0         |
| Mus_musc Mus_musc | 0        | 0        | 0.170525 | 0.175653 | 0        | 0         |
| ENSMUSG Wbp1l     | 28.62995 | 28.32422 | 27.88838 | 29.68745 | 28.31656 | 30.682426 |

|                   |          |          |          |          |          |           |
|-------------------|----------|----------|----------|----------|----------|-----------|
| ENSMUSG Fcgbp     | 0.53769  | 0.99911  | 0.482392 | 16.86543 | 17.71764 | 22.709551 |
| ENSMUSG Tmem262   | 0        | 0        | 0.045666 | 0        | 0        | 0         |
| ENSMUSG Samd9l    | 16.87118 | 17.62302 | 21.48896 | 17.16994 | 13.87821 | 14.510455 |
| ENSMUSG Mef2a     | 42.26854 | 41.91095 | 38.70569 | 30.17265 | 31.29912 | 27.194461 |
| ENSMUSG Lrrc28    | 3.254299 | 2.855884 | 2.117036 | 2.670862 | 3.340753 | 2.732943  |
| ENSMUSG Synm      | 18.57569 | 19.17477 | 17.46968 | 10.63516 | 12.50668 | 10.151535 |
| Mus_musc Mus_musc | 0        | 0        | 0        | 0        | 0        | 0.623223  |
| Mus_musc Mus_musc | 0.030295 | 0        | 0.027218 | 0.451228 | 0.261787 | 0.224485  |
| Mus_musc Mus_musc | 0.113272 | 0        | 0.481366 | 0.072682 | 0.174321 | 0         |
| Mus_musc Mus_musc | 0        | 0.072833 | 0.12538  | 0.113813 | 0.16993  | 0.133512  |
| ENSMUSG Vmn1r11   | 0        | 0        | 0        | 0        | 0        | 0         |
| ENSMUSG Vmn1r183  | 0        | 0        | 0        | 0        | 0        | 0         |
| ENSMUSG Zfp575    | 0.048377 | 0.03599  | 0.106647 | 0        | 0        | 0.020159  |
| ENSMUSG Cldn9     | 0        | 0.094639 | 0        | 0.036178 | 0.069217 | 0         |
| ENSMUSG Vmn1r234  | 0        | 0        | 0        | 0        | 0        | 0         |
| ENSMUSG Gm49378   | 0.354704 | 2.056446 | 0.55786  | 0.215446 | 0        | 0.016713  |
| ENSMUSG Olfr1028  | 0        | 0        | 0        | 0        | 0        | 0         |
| ENSMUSG Btd35f29  | 0        | 0        | 0        | 0        | 0        | 0         |
| ENSMUSG Vmn2r124  | 0        | 0        | 0        | 0        | 0        | 0         |
| ENSMUSG Gm21477   | 0        | 0        | 0        | 0        | 0        | 0         |
| Mus_musc Mus_musc | 0        | 0        | 0        | 0.370895 | 0.105875 | 0.103235  |
| Mus_musc Mus_musc | 0.097471 | 0.219433 | 0        | 0.52494  | 0.64858  | 0.390631  |
| Mus_musc Mus_musc | 0.285762 | 0.44389  | 0.122158 | 0.157788 | 0.234102 | 0.31083   |
| Mus_musc Mus_musc | 3.717331 | 2.174925 | 3.77943  | 0.870398 | 1.060194 | 2.85259   |
| ENSMUSG Zfp982    | 1.636622 | 2.186938 | 1.572982 | 1.684603 | 1.548088 | 1.5409    |
| ENSMUSG Figl2     | 2.433874 | 2.063284 | 2.256686 | 1.885273 | 1.450387 | 1.190713  |
| ENSMUSG H2a1i     | 0        | 0        | 0        | 0        | 0        | 0         |
| ENSMUSG Olfr859   | 0        | 0        | 0        | 0        | 0        | 0         |
| ENSMUSG Rbm27     | 8.80307  | 9.184941 | 7.706447 | 7.448805 | 7.398221 | 7.063647  |
| Mus_musc Mus_musc | 0.674455 | 0.703227 | 0.48903  | 0.488004 | 0.251173 | 0.527027  |
| Mus_musc Mus_musc | 0        | 0        | 0        | 0        | 0        | 0.242111  |
| Mus_musc Mus_musc | 0        | 0.060036 | 0.281215 | 0        | 0        | 0         |
| Mus_musc Mus_musc | 0.545839 | 0.347998 | 0.154987 | 0.448378 | 0.091919 | 0.291394  |
| Mus_musc Mus_musc | 0.844323 | 0.520073 | 0.725751 | 0.442667 | 0.613917 | 0.25918   |
| Mus_musc Mus_musc | 0.517341 | 0.332445 | 0.585414 | 0.02604  | 0.40463  | 0.371818  |
| Mus_musc Mus_musc | 1.267447 | 1.476199 | 0.78863  | 0.494952 | 0.99169  | 1.032049  |
| Mus_musc Mus_musc | 1.621334 | 2.054031 | 1.440951 | 1.323555 | 0.913213 | 1.452008  |
| Mus_musc Mus_musc | 0        | 0        | 0        | 0.097035 | 0        | 0         |
| Mus_musc Mus_musc | 0.452971 | 0.083988 | 0.19478  | 0.075379 | 0.045696 | 0.430065  |
| Mus_musc Mus_musc | 0        | 0        | 0        | 0        | 0.186692 | 0         |
| Mus_musc Mus_musc | 2.961612 | 3.551791 | 2.419874 | 2.9752   | 2.964691 | 2.398076  |
| Mus_musc Mus_musc | 3.283374 | 3.042747 | 3.926106 | 2.802012 | 3.446238 | 3.091934  |
| Mus_musc Mus_musc | 0        | 0        | 0        | 0.174016 | 0        | 0         |
| ENSMUSG Prkca     | 8.690221 | 9.542163 | 7.561485 | 5.952247 | 6.639744 | 5.721514  |
| ENSMUSG Lin28a    | 0.011427 | 0.039623 | 0.048777 | 0.186329 | 0.163087 | 0.158752  |
| ENSMUSG Creg2     | 0.117493 | 0.138273 | 0.135543 | 1.465038 | 1.237086 | 1.627891  |
| ENSMUSG AY358078  | 0        | 0        | 0        | 0        | 0.021468 | 0         |
| ENSMUSG Kcns2     | 0        | 0        | 0        | 0        | 0        | 0         |
| ENSMUSG Mettl26   | 17.70337 | 17.81719 | 17.31309 | 19.71057 | 17.60082 | 17.960734 |
| ENSMUSG Pde4b     | 48.68744 | 52.16365 | 52.03398 | 21.59496 | 26.31295 | 32.718148 |
| ENSMUSG Ifi204    | 3.348411 | 2.746175 | 6.324438 | 5.240079 | 3.996488 | 3.585459  |
| ENSMUSG Gm43638   | 0        | 0        | 0        | 0        | 0        | 0         |
| ENSMUSG Zfp760    | 4.047143 | 4.687601 | 3.857516 | 4.416657 | 3.644138 | 3.687247  |
| ENSMUSG Gm10226   | 1.568403 | 1.23992  | 1.89871  | 2.374809 | 1.53527  | 3.192562  |
| ENSMUSG Tctex1d1  | 0        | 0        | 0        | 0        | 0        | 0         |
| ENSMUSG Lypd4     | 0        | 0        | 0        | 0        | 0        | 0.029442  |
| ENSMUSG Rtl8b     | 94.15041 | 89.64562 | 116.2363 | 61.72284 | 68.2955  | 67.916092 |
| ENSMUSG Rtl8a     | 80.29597 | 85.71553 | 130.6445 | 62.03176 | 44.80023 | 47.252007 |
| ENSMUSG Hsf3      | 0.084548 | 0.03844  | 0.035093 | 0.09396  | 0.080706 | 0         |
| ENSMUSG Mdp1      | 15.29853 | 14.62711 | 17.3975  | 15.97143 | 14.44006 | 14.6596   |
| ENSMUSG Wdr24     | 6.407995 | 7.198609 | 5.579418 | 6.472795 | 6.375703 | 6.392137  |
| ENSMUSG Sugp2     | 4.836688 | 4.970579 | 5.287325 | 4.485229 | 3.676097 | 4.26321   |
| ENSMUSG Rec8      | 0.234707 | 0.289322 | 0.121681 | 0.322535 | 0.229181 | 0.335651  |
| ENSMUSG Ptpn23    | 9.138651 | 8.390097 | 9.166507 | 7.785493 | 8.150396 | 7.480338  |

|                   |          |          |          |          |          |           |
|-------------------|----------|----------|----------|----------|----------|-----------|
| ENSMUSG Tm9sf1    | 30.18492 | 30.59088 | 35.74195 | 34.06068 | 32.97529 | 33.628573 |
| ENSMUSG Dnajb5    | 6.695771 | 7.152436 | 9.652816 | 6.547868 | 7.037274 | 5.249838  |
| ENSMUSG Fmnl2     | 17.18118 | 16.16095 | 17.23876 | 10.91142 | 11.23637 | 9.670213  |
| ENSMUSG Mapk14    | 31.85277 | 33.0982  | 34.87391 | 27.19814 | 28.75432 | 28.444081 |
| ENSMUSG Sfmtb2    | 0.515928 | 0.600016 | 0.414688 | 0.285599 | 0.235843 | 0.334618  |
| ENSMUSG Tmprss11c | 0        | 0        | 0        | 0        | 0        | 0         |
| ENSMUSG Vmn2r15   | 0        | 0        | 0        | 0        | 0        | 0         |
| ENSMUSG Foxi3     | 0        | 0        | 0        | 0        | 0        | 0         |
| ENSMUSG Cntn4     | 0.909299 | 1.461607 | 0.869405 | 0.55082  | 0.84029  | 0.699253  |
| ENSMUSG Aox3      | 39.96238 | 43.64181 | 29.44251 | 44.33763 | 44.52962 | 49.022702 |
| ENSMUSG Grid2     | 0.088686 | 0        | 0.009297 | 0        | 0.009526 | 0.016941  |
| ENSMUSG Sart3     | 9.252948 | 8.536547 | 9.026839 | 8.394217 | 8.811295 | 8.625812  |
| ENSMUSG Hoxb1     | 0        | 0        | 0.034824 | 0        | 0        | 0.048763  |
| ENSMUSG Slc6a3    | 0.048477 | 0.039649 | 0.012954 | 0        | 0        | 0         |
| ENSMUSG Lpcat1    | 74.6642  | 72.54324 | 70.04855 | 70.98777 | 59.08049 | 69.985258 |
| ENSMUSG Atp5j2    | 47.68376 | 50.79349 | 52.63509 | 64.57482 | 57.45046 | 58.05405  |
| ENSMUSG Mbd3l1    | 0        | 0        | 0        | 0        | 0        | 0         |
| ENSMUSG Hoxb4     | 3.585714 | 3.366841 | 4.142425 | 2.513469 | 2.440533 | 2.299824  |
| ENSMUSG Josd2     | 18.90571 | 18.58223 | 18.22444 | 19.48324 | 19.38963 | 19.191676 |
| ENSMUSG Mapkap1   | 22.33005 | 21.69596 | 21.25184 | 19.96384 | 20.97235 | 20.520566 |
| ENSMUSG Taf5l     | 11.34219 | 10.1235  | 10.4593  | 9.399841 | 9.156188 | 10.28628  |
| ENSMUSG Marveld3  | 6.289406 | 7.957379 | 6.471314 | 6.002112 | 5.613335 | 6.997797  |
| ENSMUSG Tat       | 0.690531 | 0.390154 | 0.354659 | 0.092174 | 0.089141 | 0         |
| ENSMUSG Ddx18     | 15.14669 | 13.91995 | 14.07101 | 12.14915 | 12.8513  | 13.421044 |
| ENSMUSG Lyzl6     | 0        | 0        | 0        | 0        | 0        | 0         |
| ENSMUSG Gosr2     | 37.24985 | 39.25216 | 37.39641 | 35.42767 | 35.1081  | 34.882849 |
| ENSMUSG Map3k14   | 4.082931 | 3.776571 | 4.349788 | 4.703006 | 4.731372 | 5.15305   |
| ENSMUSG 1700023FC | 0.043283 | 0.110823 | 0        | 0.066181 | 0.040484 | 0         |
| ENSMUSG Fkbp3     | 19.80242 | 18.18012 | 20.47511 | 20.39463 | 16.87973 | 17.026087 |
| ENSMUSG Kihl28    | 4.754438 | 4.671134 | 4.115514 | 4.180927 | 4.091652 | 4.154955  |
| ENSMUSG Olfr480   | 0        | 0        | 0        | 0        | 0        | 0         |
| ENSMUSG Hoxd4     | 0        | 0        | 0        | 0        | 0.085285 | 0         |
| ENSMUSG Aldoart2  | 0        | 0        | 0        | 0        | 0        | 0.016441  |
| ENSMUSG Eddm3b    | 0.03995  | 0        | 0        | 0        | 0        | 0         |
| ENSMUSG Slc39a2   | 1.325887 | 1.234705 | 0.973228 | 0.497892 | 0.754688 | 0.953917  |
| ENSMUSG Tmem253   | 0.512721 | 0.499131 | 0.870073 | 0.615789 | 0.393604 | 0.406357  |
| ENSMUSG Zscan21   | 9.044082 | 7.522898 | 8.294047 | 6.746325 | 7.902587 | 6.933186  |
| ENSMUSG Frem2     | 0.289828 | 0.26328  | 0.110681 | 0.157922 | 0.137585 | 0.269806  |
| ENSMUSG Arhgap25  | 9.261332 | 8.416946 | 10.49534 | 19.94353 | 16.76095 | 21.254894 |
| ENSMUSG Sstr4     | 3.940341 | 4.113036 | 4.861897 | 2.784014 | 3.01107  | 2.062265  |
| ENSMUSG M1ap      | 0.828498 | 0.801932 | 0.421081 | 0.155225 | 0.683707 | 0.242899  |
| ENSMUSG Hk1       | 20.6567  | 19.3161  | 21.37759 | 19.35309 | 19.78122 | 20.148018 |
| ENSMUSG Tacr1     | 0.024379 | 0.277619 | 0.014804 | 0.996933 | 0.994355 | 0.60752   |
| ENSMUSG Pole4     | 12.93436 | 15.09823 | 15.47709 | 16.41707 | 14.54369 | 16.172332 |
| ENSMUSG Gkn2      | 0        | 0        | 0        | 0        | 0        | 0         |
| ENSMUSG Gkn3      | 3.165241 | 2.379806 | 2.700709 | 3.031497 | 1.486778 | 2.675112  |
| Mus_musc Mus_musc | 0        | 0.154309 | 0        | 0        | 0        | 0.183494  |
| ENSMUSG Cyb561    | 46.08927 | 44.97631 | 44.3557  | 30.73549 | 34.16897 | 31.048857 |
| Mus_musc Mus_musc | 0.226334 | 0        | 0        | 0        | 0        | 0         |
| ENSMUSG A26c2     | 0        | 0        | 0        | 0        | 0        | 0         |
| ENSMUSG Olfr312   | 0        | 0        | 0        | 0        | 0        | 0         |
| ENSMUSG Gm6803    | 0        | 0        | 0        | 0        | 0        | 0         |
| ENSMUSG Neurod4   | 0.017047 | 0        | 0        | 0.025226 | 0        | 0.016659  |
| ENSMUSG Krt35     | 0        | 0        | 0        | 0        | 0        | 0         |
| ENSMUSG Zfp473    | 0.035671 | 0.089793 | 0.122745 | 0.143053 | 0.169087 | 0.283757  |
| ENSMUSG Olfr12    | 0        | 0        | 0        | 0        | 0        | 0         |
| ENSMUSG Gm8362    | 0        | 0        | 0        | 0        | 0        | 0         |
| ENSMUSG Itgb1bp2  | 0.122635 | 1.126434 | 0.351243 | 0.306449 | 0.253185 | 0.265626  |
| ENSMUSG Zmym3     | 5.701766 | 6.458387 | 6.074113 | 5.771368 | 4.815168 | 5.530731  |
| ENSMUSG Nono      | 60.79526 | 60.34279 | 62.05141 | 58.72264 | 60.51651 | 61.56466  |
| ENSMUSG Taf1      | 11.35475 | 11.47925 | 10.23413 | 10.03293 | 9.701671 | 9.783021  |
| ENSMUSG Gm17402   | 0        | 0        | 0        | 0        | 0        | 0         |
| ENSMUSG Ttc4      | 9.584143 | 9.281765 | 8.104809 | 9.150025 | 9.87182  | 10.537649 |
| ENSMUSG Nfatc4    | 4.860763 | 4.267193 | 5.5143   | 3.466303 | 3.643479 | 3.868537  |

|                   |          |          |          |          |          |           |
|-------------------|----------|----------|----------|----------|----------|-----------|
| ENSMUSG Gpr137b   | 15.13198 | 17.15724 | 14.68066 | 19.2933  | 21.90398 | 23.104106 |
| ENSMUSG Hecw1     | 0        | 0        | 0        | 0        | 0        | 0         |
| ENSMUSG Ggps1     | 11.21385 | 12.32299 | 10.40072 | 8.743382 | 8.857395 | 8.380356  |
| ENSMUSG Gng4      | 0.46165  | 0.550883 | 0.277823 | 0.256891 | 0.130902 | 0.187894  |
| ENSMUSG Yipf7     | 0        | 0.461029 | 0        | 0.126908 | 0        | 0         |
| ENSMUSG Slc30a3   | 0        | 0        | 0        | 0        | 0.019482 | 0.047171  |
| ENSMUSG Ociad2    | 8.330809 | 9.464886 | 7.706439 | 7.047961 | 5.931393 | 7.164513  |
| ENSMUSG Ociad1    | 66.16726 | 66.24502 | 63.24156 | 61.26736 | 59.53982 | 58.755013 |
| ENSMUSG Spata18   | 9.035086 | 11.17844 | 4.361415 | 15.4804  | 14.3099  | 14.853659 |
| ENSMUSG Cwh43     | 0        | 0        | 0        | 0        | 0        | 0         |
| ENSMUSG Sgcb      | 7.947084 | 7.430566 | 7.14815  | 5.202191 | 5.895602 | 5.23734   |
| Mus_musc Mus_musc | 1.619041 | 1.874559 | 1.129063 | 30.69066 | 177.6244 | 5.585112  |
| Mus_musc Mus_musc | 1.040139 | 0.787417 | 1.521904 | 3.779616 | 61.68997 | 65.161674 |
| Mus_musc Mus_musc | 5.816487 | 4.659667 | 2.991796 | 961.083  | 3180.287 | 320.39646 |
| Mus_musc Mus_musc | 0.100017 | 0        | 0.044931 | 1.049648 | 18.78854 | 6.544562  |
| Mus_musc Mus_musc | 3.192201 | 4.309103 | 1.650171 | 101.5099 | 30.11352 | 38.371349 |
| Mus_musc Mus_musc | 2.660218 | 1.482722 | 1.006212 | 18.48186 | 4.211524 | 8.546952  |
| Mus_musc Mus_musc | 0        | 0.061399 | 0.134432 | 1.450582 | 0.472137 | 0.675829  |
| Mus_musc Mus_musc | 0.450572 | 3.331033 | 0.313451 | 478.05   | 446.361  | 185.28363 |
| Mus_musc Mus_musc | 0        | 0        | 0        | 17.74266 | 13.21697 | 0.321044  |
| ENSMUSG Trank1    | 0.008043 | 0        | 0.004818 | 0        | 0        | 0         |
| ENSMUSG Dhdkd1    | 0.663977 | 0.716693 | 0.472867 | 0.445932 | 0.423703 | 0.25013   |
| ENSMUSG Sec61a2   | 3.428643 | 4.103986 | 3.293923 | 2.425717 | 2.533241 | 2.370509  |
| ENSMUSG Nudt5     | 5.55334  | 5.551112 | 5.605387 | 5.813823 | 4.89085  | 5.655012  |
| ENSMUSG Nrp1      | 103.5481 | 98.85738 | 98.19296 | 80.39542 | 82.67974 | 80.009445 |
| ENSMUSG Pard3     | 16.47288 | 17.34296 | 13.78531 | 11.43074 | 10.87453 | 10.379904 |
| ENSMUSG Homer2    | 1.088497 | 1.574233 | 0.920259 | 0.47722  | 0.991961 | 0.84786   |
| ENSMUSG Wbp2nl    | 0        | 0        | 0.058823 | 0        | 0        | 0         |
| ENSMUSG Nell2     | 0        | 0.012028 | 0        | 0        | 0        | 0         |
| ENSMUSG 3-Sep     | 1.10326  | 1.046939 | 1.168294 | 1.735093 | 1.488724 | 1.970648  |
| ENSMUSG Twf1      | 27.35822 | 28.62015 | 25.53997 | 25.4985  | 25.54527 | 24.706638 |
| ENSMUSG Ndufa6    | 57.0462  | 75.72596 | 71.92281 | 80.9389  | 67.41063 | 68.978124 |
| ENSMUSG Naga      | 32.14825 | 30.35344 | 31.40411 | 33.21039 | 34.36997 | 38.645039 |
| ENSMUSG Smdt1     | 61.86688 | 64.98882 | 76.4697  | 67.61669 | 65.43887 | 71.318898 |
| ENSMUSG Serpinb7  | 0.181455 | 0        | 0        | 0        | 0.106356 | 0.029282  |
| ENSMUSG Naa25     | 5.287616 | 5.769728 | 4.977358 | 5.293865 | 4.855006 | 5.74381   |
| ENSMUSG Plch1     | 0.558745 | 0.723784 | 0.310514 | 1.428927 | 1.164361 | 1.212825  |
| ENSMUSG Psenen    | 54.31765 | 55.71391 | 53.88066 | 57.3024  | 54.90325 | 50.296974 |
| ENSMUSG Lpar3     | 6.259676 | 7.001157 | 3.987277 | 4.310219 | 4.807934 | 4.631367  |
| ENSMUSG Pnpla7    | 6.802984 | 6.412911 | 6.872409 | 8.787808 | 10.12807 | 10.512659 |
| ENSMUSG Nr2f1     | 1.53336  | 1.432914 | 1.86418  | 1.282872 | 1.013394 | 0.864381  |
| ENSMUSG Adgrv1    | 0.180495 | 0.341381 | 0.336011 | 0.154713 | 0.118872 | 0.108428  |
| ENSMUSG Toe1      | 8.580607 | 9.416358 | 9.110718 | 7.499642 | 8.545805 | 8.401483  |
| ENSMUSG Ccdc163   | 3.665933 | 2.694684 | 4.010624 | 3.388322 | 3.224421 | 2.860328  |
| ENSMUSG Mutyh     | 1.18162  | 0.764363 | 1.496014 | 0.790016 | 1.029178 | 0.994687  |
| ENSMUSG Urod      | 22.01039 | 21.58211 | 20.377   | 17.74318 | 19.45406 | 20.093455 |
| ENSMUSG Eif2b3    | 8.625564 | 6.806004 | 9.106183 | 7.078997 | 5.922128 | 5.863371  |
| ENSMUSG Plk3      | 6.777849 | 6.37628  | 6.74912  | 6.272434 | 6.185218 | 6.558742  |
| ENSMUSG Ptch2     | 0.968049 | 0.822577 | 0.817883 | 0.97863  | 1.286077 | 1.207193  |
| ENSMUSG Rif       | 5.298368 | 6.971349 | 5.913298 | 5.767772 | 5.258283 | 5.519023  |
| ENSMUSG Nlrc3     | 0.780445 | 0.846426 | 1.46471  | 1.462121 | 1.390262 | 1.718625  |
| ENSMUSG Calhm5    | 0.6807   | 0.738296 | 0.917993 | 0.770111 | 0.796643 | 0.52986   |
| ENSMUSG Scube2    | 14.69689 | 13.33206 | 14.49937 | 10.19232 | 9.502377 | 9.100562  |
| ENSMUSG Aacs      | 8.354889 | 8.034658 | 9.992216 | 12.54673 | 9.254903 | 15.642735 |
| ENSMUSG Dhx37     | 4.171772 | 3.803453 | 3.701668 | 3.836149 | 3.413391 | 4.347616  |
| ENSMUSG Mrpl1     | 3.080672 | 3.011947 | 3.303675 | 4.166519 | 4.433676 | 4.354607  |
| ENSMUSG Anxa3     | 165.4051 | 148.4086 | 185.5057 | 136.0725 | 134.5283 | 139.1009  |
| ENSMUSG Pcdh17    | 7.631907 | 6.80187  | 6.158151 | 5.779081 | 6.399768 | 4.887699  |
| ENSMUSG Aldh1b1   | 0.445613 | 1.439481 | 0.616713 | 1.839967 | 1.721664 | 2.217529  |
| ENSMUSG Wdr20rt   | 0        | 0        | 0        | 0        | 0        | 0         |
| ENSMUSG Ankrd11   | 32.45845 | 33.07358 | 30.86566 | 26.60921 | 29.43808 | 28.168329 |
| ENSMUSG Tcf3      | 19.93009 | 18.76113 | 20.90861 | 20.66962 | 23.03122 | 23.191357 |
| ENSMUSG Cnot2     | 21.45705 | 22.28741 | 22.48915 | 20.88009 | 19.8677  | 20.057119 |
| ENSMUSG Uqcr11    | 45.05456 | 57.38918 | 51.93287 | 57.25276 | 56.81322 | 57.826408 |



|                   |          |          |          |          |          |           |
|-------------------|----------|----------|----------|----------|----------|-----------|
| ENSMUSG Meis1     | 14.96939 | 12.31869 | 15.1639  | 9.319394 | 11.35302 | 10.299551 |
| ENSMUSG Best3     | 1.11505  | 0.877559 | 0.893019 | 0.604864 | 0.441498 | 0.413555  |
| ENSMUSG Olfr299   | 0        | 0        | 0        | 0        | 0        | 0         |
| ENSMUSG 3110040N  | 7.64757  | 7.683496 | 7.87921  | 8.676215 | 8.617595 | 10.813832 |
| ENSMUSG Btbd1     | 22.54016 | 25.37132 | 22.1483  | 22.79158 | 22.86034 | 22.910521 |
| ENSMUSG Fmn2      | 0.141155 | 0.058662 | 0.081583 | 0.081011 | 0.059758 | 0.115538  |
| ENSMUSG Hdgfl3    | 5.052899 | 5.302063 | 4.796169 | 2.717111 | 3.400529 | 2.818235  |
| ENSMUSG Kif12     | 0        | 0.01524  | 0        | 0        | 0        | 0         |
| ENSMUSG Zfp618    | 0.314137 | 0.28533  | 0.303246 | 0.313588 | 0.247517 | 0.308252  |
| ENSMUSG Orm3      | 0.978834 | 1.234474 | 1.451146 | 0.523624 | 0.719478 | 0.673602  |
| ENSMUSG Tango2    | 12.81486 | 14.56821 | 14.816   | 10.64826 | 14.38863 | 12.144129 |
| ENSMUSG Gpr61     | 0.015328 | 0        | 0        | 0        | 0        | 0         |
| ENSMUSG Plcx2     | 0.513821 | 0.553957 | 0.762177 | 0.920482 | 0.938979 | 0.830231  |
| ENSMUSG Cenpv     | 2.598915 | 4.342697 | 4.589476 | 4.459017 | 3.814429 | 4.082115  |
| ENSMUSG Trpv2     | 7.244209 | 6.519507 | 8.419969 | 9.761466 | 10.4067  | 11.496983 |
| ENSMUSG Adora2b   | 6.12636  | 7.011161 | 6.52469  | 9.059215 | 8.890907 | 9.624505  |
| ENSMUSG Ncor1     | 29.81138 | 32.98771 | 26.17921 | 30.55945 | 31.60814 | 31.468619 |
| ENSMUSG St3gal4   | 19.44694 | 20.93202 | 21.96157 | 30.10921 | 27.64948 | 32.485357 |
| ENSMUSG Tmco1     | 53.58998 | 51.57397 | 53.86932 | 45.69035 | 42.38453 | 42.607033 |
| ENSMUSG B4galt3   | 14.35252 | 15.33952 | 16.69249 | 15.18386 | 15.16641 | 13.452696 |
| ENSMUSG Barx2     | 0.940922 | 1.848104 | 0.717635 | 1.108557 | 0.88584  | 1.183733  |
| ENSMUSG Cul5      | 8.504424 | 8.161191 | 6.328072 | 7.383764 | 6.263698 | 8.062613  |
| ENSMUSG Kirrel3   | 0.418495 | 0.277361 | 0.357874 | 0.160627 | 0.169525 | 0.225047  |
| ENSMUSG Kcnj5     | 0.111655 | 0.793885 | 0.139764 | 0.379854 | 0.145026 | 0.298787  |
| ENSMUSG Ets1      | 64.87472 | 54.36005 | 59.21147 | 45.5414  | 44.98837 | 43.669338 |
| ENSMUSG Vstm2a    | 2.218209 | 2.015299 | 2.893636 | 0.169832 | 0.423158 | 0.347624  |
| ENSMUSG Slc39a9   | 19.06422 | 19.94573 | 16.47185 | 18.5654  | 19.57623 | 18.926912 |
| ENSMUSG Vps37c    | 9.996551 | 8.876866 | 10.30371 | 10.097   | 9.95803  | 9.115298  |
| ENSMUSG 2310057N  | 0        | 0        | 0        | 0        | 0        | 0         |
| ENSMUSG Mal2      | 123.9278 | 118.6365 | 111.1359 | 86.46621 | 84.13905 | 85.582611 |
| ENSMUSG Nsd1      | 15.27022 | 16.43124 | 13.54694 | 14.79167 | 15.541   | 15.677106 |
| ENSMUSG Hoxd10    | 0        | 0.025492 | 0.079445 | 0        | 0        | 0.060753  |
| ENSMUSG Cdk20     | 0.932713 | 0.915224 | 1.249877 | 1.565539 | 1.358441 | 1.341963  |
| ENSMUSG Aaed1     | 24.50397 | 24.22942 | 20.49413 | 17.38389 | 18.21477 | 16.845435 |
| ENSMUSG Zfp346    | 7.350258 | 6.304918 | 7.229391 | 5.728244 | 5.746089 | 5.346625  |
| ENSMUSG Lck       | 9.626015 | 6.276429 | 13.88867 | 13.97416 | 10.41345 | 12.545261 |
| ENSMUSG Prelid1   | 48.07979 | 47.53065 | 52.08489 | 48.08751 | 47.72647 | 52.474636 |
| ENSMUSG Mxd3      | 0.497925 | 0.407207 | 0.754315 | 1.28005  | 1.417484 | 1.43481   |
| ENSMUSG Lman2     | 34.54796 | 36.02478 | 35.96128 | 42.19772 | 44.36559 | 45.032726 |
| ENSMUSG Olfr456   | 0.257384 | 0        | 0        | 0        | 0        | 0         |
| ENSMUSG Gm8126    | 0        | 0        | 0.027486 | 0.051919 | 0.129542 | 0.082929  |
| ENSMUSG Senp1     | 6.486984 | 7.51639  | 6.713694 | 6.269341 | 6.24993  | 7.199377  |
| ENSMUSG Il5ra     | 0.162627 | 0.07027  | 0.159577 | 3.169821 | 3.394466 | 2.637872  |
| ENSMUSG Slc1a3    | 5.063344 | 6.338451 | 5.544093 | 5.78715  | 5.081524 | 6.268567  |
| ENSMUSG Crbn      | 19.50775 | 21.69326 | 20.18265 | 22.03152 | 20.19722 | 19.934608 |
| ENSMUSG Frmd3     | 0.033506 | 0.059881 | 0        | 0.044093 | 0.076419 | 0.012736  |
| ENSMUSG Catsperg2 | 0.128038 | 0.10647  | 0.139681 | 0.047166 | 0.056469 | 0.111948  |
| ENSMUSG Gm8186    | 3.190202 | 13.86225 | 5.621285 | 6.920543 | 8.610829 | 9.307132  |
| ENSMUSG Fam110c   | 2.313767 | 2.200456 | 1.569553 | 1.594265 | 1.692897 | 2.233239  |
| ENSMUSG Ivl       | 0        | 0.076191 | 0.03762  | 0.216751 | 0.412919 | 0.38706   |
| ENSMUSG Rnf170    | 5.923918 | 4.472483 | 4.483144 | 5.637585 | 5.475179 | 4.060164  |
| ENSMUSG Zfp775    | 2.082307 | 1.951683 | 1.697386 | 1.117847 | 1.267225 | 1.325066  |
| ENSMUSG Vmn1r33   | 0        | 0        | 0        | 0        | 0        | 0         |
| ENSMUSG Dnmt1     | 13.03083 | 12.1652  | 12.32924 | 11.79413 | 13.73878 | 14.197516 |
| ENSMUSG Col5a3    | 0.333288 | 0.314999 | 0.356039 | 0.306057 | 0.301655 | 0.631844  |
| ENSMUSG Olfr427   | 0        | 0        | 0        | 0        | 0        | 0         |
| ENSMUSG Cwc15     | 50.16877 | 49.43719 | 51.39221 | 45.9424  | 49.86444 | 43.86558  |
| ENSMUSG Olfr1014  | 0        | 0        | 0        | 0        | 0        | 0         |
| ENSMUSG Gm6569    | 0        | 0.023784 | 0        | 0        | 0        | 0         |
| ENSMUSG Tcf24     | 0.478342 | 0.527162 | 0.335699 | 0.484125 | 0.513472 | 0.609283  |
| ENSMUSG Surf6     | 7.08026  | 6.566354 | 8.021339 | 7.412614 | 6.696794 | 7.036379  |
| ENSMUSG Mtmr10    | 11.17679 | 11.80392 | 10.02728 | 9.24228  | 9.518957 | 8.615224  |
| ENSMUSG Trpm1     | 0        | 0.080302 | 0        | 0.096165 | 0.110917 | 0.057794  |
| ENSMUSG Mphosph1  | 9.784201 | 10.13938 | 10.87959 | 10.4299  | 10.65517 | 10.616313 |

|                    |          |          |          |          |          |           |
|--------------------|----------|----------|----------|----------|----------|-----------|
| ENSMUSG Crtc3      | 8.197876 | 9.078287 | 8.44331  | 7.052808 | 7.65811  | 8.05461   |
| ENSMUSG Chrna7     | 0.363033 | 0.250994 | 0.465266 | 0.467449 | 0.483262 | 0.608577  |
| ENSMUSG Blm        | 0.517054 | 0.41937  | 0.481582 | 1.134089 | 0.724992 | 1.298651  |
| ENSMUSG Csn1s1     | 0        | 0        | 0        | 0        | 0        | 0         |
| Mus_musc Mus_musc  | 0.32515  | 0.144908 | 0.276224 | 0.464961 | 0.241885 | 0.24984   |
| ENSMUSG Eid2b      | 4.917704 | 4.9965   | 4.31546  | 4.608297 | 5.04048  | 3.596734  |
| ENSMUSG Gtsf1l     | 0.044835 | 0.143797 | 0        | 0.489024 | 0.153306 | 0.067221  |
| ENSMUSG Zfp974     | 1.649369 | 1.812574 | 1.55069  | 1.7169   | 1.51938  | 1.161606  |
| Mus_musc Mus_musc  | 0        | 0        | 0        | 0.278436 | 0        | 0         |
| Mus_musc Mus_musc  | 0.639477 | 0.342381 | 0.299173 | 0.334212 | 0.642325 | 0.699962  |
| ENSMUSG Psg19      | 0.014828 | 0        | 0.015489 | 0        | 0        | 0.077962  |
| ENSMUSG Psg17      | 0        | 0        | 0.069505 | 0.064635 | 0        | 0.02219   |
| Mus_musc Mus_musc  | 0        | 0.338591 | 0.064709 | 0.314011 | 0.29225  | 0.402126  |
| Mus_musc Mus_musc  | 1.140687 | 1.285388 | 0.952761 | 2.675241 | 3.034337 | 3.47053   |
| Mus_musc Mus_musc  | 0.700472 | 0.638391 | 1.116293 | 0.91763  | 1.11057  | 1.557332  |
| Mus_musc Mus_musc  | 0.188031 | 0        | 0        | 0        | 0        | 0         |
| Mus_musc Mus_musc  | 0.233348 | 0.424998 | 0.403097 | 0.44902  | 0.272428 | 0.447436  |
| ENSMUSG Gm9733     | 1.54989  | 0.797514 | 1.275769 | 1.029173 | 0.684237 | 0.377016  |
| ENSMUSG Gm21258    | 0        | 0        | 0        | 0        | 0        | 0         |
| Mus_musc Mus_musc  | 0        | 0.284879 | 0        | 0        | 0        | 0.244259  |
| Mus_musc Mus_musc  | 0        | 0        | 0        | 0.349669 | 0        | 0         |
| ENSMUSG Olfr106-ps | 0        | 0        | 0        | 0        | 0        | 0         |
| ENSMUSG Rhox3a2    | 0        | 0        | 0        | 0        | 0        | 0         |
| ENSMUSG Gm12117    | 0        | 0        | 0        | 0        | 0        | 0         |
| ENSMUSG Olfr247    | 0        | 0        | 0        | 0        | 0        | 0         |
| ENSMUSG Gm21188    | 2.001499 | 2.379538 | 2.930664 | 4.156038 | 4.182023 | 4.254718  |
| ENSMUSG Mettl17    | 6.733046 | 6.85446  | 8.568732 | 7.083102 | 6.942707 | 7.810369  |
| ENSMUSG Pet117     | 0.69129  | 0.315152 | 0.320962 | 0.30752  | 0.583698 | 0.027531  |
| ENSMUSG Fam57b     | 1.588631 | 1.033136 | 1.543276 | 0.769628 | 0.951144 | 0.726853  |
| ENSMUSG Synb       | 0.027822 | 0.024545 | 0        | 0.041941 | 0.039594 | 0.038382  |
| ENSMUSG Kcna1      | 0.015759 | 0.106061 | 0.065849 | 0.059073 | 0.026716 | 0.075195  |
| ENSMUSG Trim59     | 2.049108 | 1.691387 | 1.921875 | 2.756906 | 2.983904 | 3.712953  |
| ENSMUSG Kif4       | 0.667064 | 0.633922 | 0.425603 | 1.100666 | 1.213296 | 1.071274  |
| ENSMUSG Tmem132c   | 2.36413  | 2.27177  | 1.951393 | 1.449587 | 1.084026 | 1.457919  |
| ENSMUSG Iqsec1     | 24.33904 | 23.89281 | 21.61789 | 22.34541 | 21.44354 | 22.639628 |
| ENSMUSG Ankef1     | 0.247246 | 0.288323 | 0.106043 | 0.152033 | 0.164693 | 0.141611  |
| Mus_musc Mus_musc  | 2.20801  | 2.089693 | 1.876297 | 1.750822 | 1.013381 | 0.866685  |
| ENSMUSG Tmem215    | 0.040046 | 0.010009 | 0.016419 | 0.01103  | 0.022602 | 0.042963  |
| Mus_musc Mus_musc  | 0        | 0        | 0        | 0        | 0.16791  | 0.277947  |
| ENSMUSG Ticrr      | 0.081204 | 0.08932  | 0.171949 | 0.219146 | 0.281478 | 0.321859  |
| Mus_musc Mus_musc  | 0        | 0        | 0.101143 | 0.125021 | 0        | 0.21697   |
| Mus_musc Mus_musc  | 0        | 0.156925 | 0.036937 | 0.069311 | 0.142878 | 0.234603  |
| Mus_musc Mus_musc  | 0        | 0.075612 | 0        | 0.202294 | 0        | 0         |
| Mus_musc Mus_musc  | 0.158569 | 0.046727 | 0.294151 | 0.208942 | 0        | 0         |
| ENSMUSG Bdh1       | 0.963767 | 1.487142 | 1.156255 | 1.919222 | 2.076579 | 2.115542  |
| Mus_musc Mus_musc  | 0        | 0        | 0        | 0        | 0        | 0         |
| ENSMUSG Fam8a1     | 24.76254 | 23.5384  | 22.76551 | 18.23574 | 18.44996 | 15.823831 |
| ENSMUSG Gjb4       | 0.0749   | 0.363043 | 0.195709 | 0.371395 | 0.136598 | 0.156144  |
| ENSMUSG C730034Fc  | 0.390202 | 0.408563 | 1.009827 | 0.731156 | 0.590014 | 0.510971  |
| ENSMUSG Xirp1      | 0.087688 | 0.31578  | 0.066718 | 0.188917 | 0.080381 | 0.070564  |
| ENSMUSG Gm5622     | 0        | 0        | 0        | 0        | 0        | 0         |
| ENSMUSG Gm13691    | 0        | 0        | 0        | 0        | 0        | 0         |
| Mus_musc Mus_musc  | 0        | 0.136722 | 0.244112 | 0.04967  | 0.091773 | 0.060787  |
| Mus_musc Mus_musc  | 0.333235 | 0.174311 | 0.167392 | 0.171702 | 0.065548 | 0.379077  |
| Mus_musc Mus_musc  | 0        | 0.222028 | 0        | 0        | 0        | 0.438602  |
| ENSMUSG Shld1      | 5.089012 | 5.068546 | 6.054539 | 2.706537 | 5.025329 | 6.007887  |
| Mus_musc Mus_musc  | 0        | 0        | 0        | 0        | 0        | 0         |
| ENSMUSG Ccl5       | 36.46909 | 18.53742 | 108.92   | 42.48382 | 22.03461 | 40.529804 |
| ENSMUSG Creb3l3    | 0        | 0        | 0        | 0.107186 | 0        | 0.137377  |
| ENSMUSG Kri1       | 6.870271 | 7.135144 | 8.532064 | 7.237689 | 7.296688 | 6.246576  |
| ENSMUSG Zc3h12b    | 0.429218 | 0.371474 | 0.220797 | 0.165718 | 0.30803  | 0.398751  |
| ENSMUSG Anapc13    | 22.5915  | 25.24064 | 28.22294 | 25.78476 | 23.98765 | 22.137575 |
| ENSMUSG Rrp12      | 2.47201  | 1.92599  | 1.891604 | 2.054813 | 2.333374 | 2.427685  |
| ENSMUSG Gtf2f1     | 22.03549 | 22.26376 | 26.09434 | 21.36279 | 19.98636 | 24.706594 |

|                   |          |          |          |          |          |           |
|-------------------|----------|----------|----------|----------|----------|-----------|
| ENSMUSG Nrg3      | 0        | 0        | 0        | 0        | 0        | 0         |
| ENSMUSG Cmtm8     | 20.80327 | 24.64822 | 22.04678 | 21.65896 | 20.29034 | 22.458605 |
| ENSMUSG Plppr4    | 0.051993 | 0.14881  | 0.136905 | 0.563063 | 0.715468 | 0.611572  |
| ENSMUSG Prss42    | 0        | 0.042961 | 0        | 0        | 0        | 0         |
| ENSMUSG Mettl16   | 2.217524 | 3.042993 | 2.220202 | 2.573599 | 2.07134  | 2.242718  |
| ENSMUSG Mrps11    | 7.988118 | 9.693519 | 9.206691 | 8.559975 | 10.18593 | 10.076803 |
| ENSMUSG Lce3f     | 0        | 0        | 0        | 0        | 0        | 0         |
| ENSMUSG Ssb       | 42.75685 | 42.36032 | 46.72583 | 48.41559 | 42.64881 | 39.331671 |
| ENSMUSG Efnb2     | 84.3459  | 74.85779 | 75.67507 | 41.13961 | 42.61781 | 40.206089 |
| ENSMUSG Rrp15     | 6.195358 | 5.83636  | 6.212592 | 6.075943 | 5.106269 | 6.371645  |
| ENSMUSG Epn3      | 13.34592 | 13.23214 | 10.51786 | 11.35886 | 9.32796  | 10.713413 |
| ENSMUSG Rnf112    | 0.010707 | 0.114084 | 0.066965 | 0.067327 | 0        | 0.069922  |
| Mus_musc Mus_musc | 0.229692 | 0.043922 | 0.263095 | 0.150198 | 0.175685 | 0         |
| Mus_musc Mus_musc | 0        | 0        | 0        | 0        | 0        | 0.368372  |
| Mus_musc Mus_musc | 0        | 0        | 0        | 0        | 0        | 0         |
| Mus_musc Mus_musc | 0.930767 | 0.975537 | 0.958026 | 0.719365 | 1.160646 | 0.763249  |
| ENSMUSG Aldh2     | 251.6455 | 235.6554 | 245.3949 | 145.6752 | 151.9429 | 145.14626 |
| ENSMUSG Pgbd5     | 0.072073 | 0.139558 | 0.227713 | 0.02547  | 0.079266 | 0.105423  |
| ENSMUSG Defb6     | 0        | 0        | 0        | 0        | 0        | 0         |
| ENSMUSG Tbr1      | 0        | 0        | 0        | 0        | 0        | 0         |
| ENSMUSG Gpatch1   | 7.446859 | 7.286844 | 6.286396 | 5.936683 | 5.587851 | 6.392436  |
| ENSMUSG Gpr45     | 0        | 0        | 0        | 0        | 0        | 0         |
| ENSMUSG Cd200r2   | 0        | 0        | 0        | 0        | 0        | 0         |
| ENSMUSG Ugt1a9    | 0        | 0        | 0        | 0        | 0        | 0         |
| ENSMUSG Fbxw10    | 0.062789 | 0.113685 | 0.114941 | 0.162551 | 0.331283 | 0.251622  |
| ENSMUSG Ugt1a2    | 0        | 0.007072 | 0        | 0        | 0        | 0         |
| ENSMUSG Eppk1     | 2.028029 | 2.154165 | 1.437425 | 1.272693 | 1.693449 | 1.713357  |
| Mus_musc Mus_musc | 0        | 0        | 0        | 0.105603 | 0        | 0         |
| Mus_musc Mus_musc | 0.585731 | 0.337512 | 0.565147 | 5.114557 | 5.020507 | 4.925407  |
| Mus_musc Mus_musc | 0.14464  | 0        | 0        | 0        | 0        | 0         |
| Mus_musc Mus_musc | 0.4174   | 0.311893 | 0.241768 | 0.440205 | 0.14325  | 0.136854  |
| ENSMUSG Lin28b    | 0        | 0.00857  | 0        | 0        | 0        | 0         |
| Mus_musc Mus_musc | 0        | 0        | 0        | 0.323465 | 0        | 0         |
| Mus_musc Mus_musc | 0        | 0.236577 | 0.112455 | 0        | 0        | 0         |
| Mus_musc Mus_musc | 0.188492 | 0.031769 | 0.22028  | 0        | 0        | 0         |
| Mus_musc Mus_musc | 1.146505 | 1.06425  | 0.987785 | 1.217579 | 1.497406 | 1.326474  |
| Mus_musc Mus_musc | 0        | 0        | 0        | 0.249545 | 0.167059 | 0         |
| Mus_musc Mus_musc | 0        | 0        | 0        | 0        | 0.359024 | 0         |
| Mus_musc Mus_musc | 0        | 0        | 0        | 0.375283 | 0        | 0         |
| ENSMUSG Olfr739   | 0        | 0        | 0        | 0        | 0        | 0         |
| ENSMUSG Igf2bp3   | 0.059465 | 0.126285 | 0.102941 | 0.220324 | 0.25092  | 0.273412  |
| ENSMUSG Calhm3    | 0        | 0        | 0        | 0        | 0        | 0         |
| ENSMUSG Gm21789   | 0        | 0        | 0        | 0        | 0        | 0         |
| ENSMUSG Cdt1      | 3.266664 | 2.694273 | 3.103601 | 4.53237  | 6.273255 | 5.324194  |
| ENSMUSG Actr3b    | 0.483471 | 0.307935 | 0.705743 | 0.942986 | 0.494119 | 0.495139  |
| ENSMUSG Mbd3l2    | 0        | 0        | 0        | 0        | 0        | 0         |
| ENSMUSG Baiap3    | 3.640191 | 3.149128 | 3.052642 | 1.674263 | 1.833969 | 1.729234  |
| ENSMUSG Mroh7     | 0.049885 | 0.057733 | 0.058502 | 0.023864 | 0.037201 | 0         |
| ENSMUSG Cldn4     | 3.809811 | 2.016217 | 1.083108 | 3.173208 | 2.501945 | 3.888298  |
| Mus_musc Mus_musc | 0        | 0        | 0        | 0        | 0        | 0         |
| ENSMUSG Dnajc5b   | 0        | 0        | 0.212276 | 0.419032 | 0.382751 | 0.411565  |
| ENSMUSG Mgat5b    | 0        | 0        | 0        | 0        | 0        | 0         |
| ENSMUSG Pabpc2    | 0        | 0.015813 | 0.058795 | 0        | 0        | 0         |
| ENSMUSG Pi4kb     | 13.99627 | 15.05977 | 14.35594 | 14.30525 | 15.18961 | 16.200181 |
| ENSMUSG Garnl3    | 5.203699 | 3.854069 | 3.573524 | 3.27304  | 2.730785 | 3.11299   |
| ENSMUSG Mtrf1     | 10.0287  | 11.44926 | 11.77613 | 10.54208 | 9.872782 | 10.610873 |
| ENSMUSG Gm32742   | 0.106314 | 0.19767  | 0        | 0.167702 | 0.156987 | 0.177092  |
| ENSMUSG Ifna5     | 0        | 0        | 0        | 0        | 0        | 0         |
| ENSMUSG Zkscan6   | 4.619857 | 5.083232 | 5.209414 | 5.036172 | 4.925568 | 4.428421  |
| ENSMUSG Anxa6     | 98.78463 | 94.75104 | 103.0474 | 85.82658 | 88.22121 | 98.259537 |
| ENSMUSG Il12rb2   | 0.929385 | 0.94396  | 1.768008 | 0.899812 | 0.772417 | 1.019026  |
| ENSMUSG Olfr601   | 0        | 0        | 0        | 0        | 0        | 0         |
| ENSMUSG Olfr1294  | 0        | 0        | 0        | 0        | 0        | 0         |
| ENSMUSG Olfr851   | 0        | 0        | 0        | 0        | 0        | 0         |

|                   |          |          |          |          |          |           |
|-------------------|----------|----------|----------|----------|----------|-----------|
| ENSMUSG Hmgb1     | 24.2262  | 25.1295  | 21.84761 | 20.46603 | 20.45134 | 16.933966 |
| ENSMUSG Ano9      | 0.719303 | 0.575478 | 0.693315 | 0.80659  | 0.542082 | 0.675797  |
| ENSMUSG Irs4      | 0        | 0        | 0.008025 | 0.008294 | 0        | 0         |
| ENSMUSG Olfr63    | 0        | 0        | 0        | 0        | 0        | 0         |
| ENSMUSG Sfxn4     | 2.994518 | 2.611017 | 1.180454 | 1.993483 | 1.575615 | 1.065062  |
| ENSMUSG Cycs      | 16.42176 | 18.11213 | 17.34096 | 19.05589 | 20.82617 | 19.417212 |
| ENSMUSG Naa15     | 7.46826  | 7.696949 | 7.19565  | 7.507855 | 7.006809 | 7.604038  |
| Mus_musc Mus_musc | 0        | 0.153048 | 0.148768 | 0        | 0        | 0         |
| ENSMUSG Fam32a    | 38.98607 | 38.37035 | 41.80073 | 40.79236 | 36.51175 | 38.168255 |
| ENSMUSG Uba2      | 34.81803 | 32.8313  | 33.89678 | 29.11881 | 30.97567 | 29.335276 |
| Mus_musc Mus_musc | 0.890648 | 1.164061 | 0.671746 | 0.513096 | 0.20824  | 0.283072  |
| ENSMUSG Oscar     | 0        | 0.080925 | 0        | 0.034537 | 0.061244 | 0.030211  |
| ENSMUSG 9130230L2 | 0.518056 | 0.340563 | 0.460101 | 0.853086 | 0.748343 | 0.636798  |
| ENSMUSG Olfr1537  | 0        | 0        | 0        | 0        | 0        | 0         |
| ENSMUSG Vmn1r222  | 0        | 0        | 0        | 0        | 0        | 0         |
| ENSMUSG Vtn       | 8.853272 | 8.877958 | 12.20971 | 5.713398 | 6.068625 | 4.934005  |
| ENSMUSG Clasrp    | 8.724918 | 8.845058 | 10.67746 | 6.725402 | 6.932849 | 7.313422  |
| Mus_musc Mus_musc | 0        | 0        | 0        | 0.544338 | 0        | 0.084436  |
| ENSMUSG Micu2     | 17.80732 | 15.68648 | 14.32113 | 15.83271 | 15.49318 | 16.736076 |
| ENSMUSG Gm21866   | 0        | 0        | 0        | 0        | 0        | 0         |
| ENSMUSG 1700129C1 | 0        | 0        | 0        | 0        | 0        | 0         |
| ENSMUSG Gm3033    | 0        | 0        | 0        | 0        | 0        | 0         |
| ENSMUSG Olfr239   | 0        | 0.020445 | 0        | 0        | 0        | 0         |
| ENSMUSG Fgf9      | 0.525808 | 0.484426 | 0.315602 | 0.257687 | 0.296764 | 0.654948  |
| ENSMUSG Extl3     | 19.24101 | 17.68849 | 17.89631 | 15.88731 | 16.14263 | 17.379536 |
| ENSMUSG Gm136     | 0        | 0        | 0        | 0        | 0.027627 | 0         |
| ENSMUSG Ndufb6    | 21.75946 | 24.45939 | 21.99605 | 26.9414  | 24.77901 | 22.234385 |
| ENSMUSG Sdr16c6   | 0        | 0        | 0        | 0        | 0        | 0         |
| ENSMUSG Scrn1     | 5.923424 | 5.182802 | 4.797911 | 3.325    | 3.683472 | 3.285075  |
| ENSMUSG Ccl9      | 3.5761   | 3.807579 | 3.672957 | 65.20924 | 80.83234 | 77.028168 |
| ENSMUSG H2a1b     | 0        | 0        | 0        | 0        | 0        | 0         |
| ENSMUSG Gm28269   | 0        | 0        | 0        | 0        | 0        | 0         |
| ENSMUSG Stk36     | 2.793723 | 2.891481 | 2.189232 | 2.555967 | 2.247581 | 1.710074  |
| ENSMUSG Ptpm      | 61.57838 | 56.06829 | 43.24258 | 32.7574  | 33.14864 | 32.146678 |
| ENSMUSG Hcar1     | 0.440973 | 0.569934 | 0.370271 | 0.746601 | 0.468635 | 0.498284  |
| ENSMUSG Cyb561d2  | 5.821219 | 6.252854 | 6.820979 | 7.746949 | 7.504525 | 8.313729  |
| ENSMUSG Pacrg     | 2.346123 | 2.93763  | 1.913731 | 2.141696 | 1.875277 | 1.872082  |
| ENSMUSG Rbm17     | 25.43613 | 26.21897 | 26.29157 | 24.80289 | 24.69823 | 24.909491 |
| ENSMUSG Tex44     | 0        | 0        | 0        | 0        | 0.025232 | 0         |
| ENSMUSG Upf3b     | 7.879998 | 8.000429 | 8.54235  | 8.430411 | 8.412523 | 7.874379  |
| ENSMUSG Fxyd1     | 32.74138 | 36.23959 | 34.72285 | 22.55277 | 20.82514 | 19.404749 |
| ENSMUSG Gm3072    | 0        | 0        | 0        | 0        | 0        | 0         |
| ENSMUSG Vmn2r106  | 0        | 0        | 0        | 0        | 0        | 0         |
| ENSMUSG Vmn2r36   | 0        | 0        | 0        | 0        | 0        | 0         |
| ENSMUSG Apol11a   | 0        | 0        | 0.027074 | 0        | 0        | 0         |
| ENSMUSG Vmn1r57   | 0        | 0        | 0        | 0        | 0        | 0         |
| ENSMUSG Myh11     | 20.99761 | 18.78282 | 18.73654 | 26.91807 | 31.20949 | 26.931676 |
| ENSMUSG Kdm1b     | 7.264731 | 6.867441 | 6.37205  | 6.425267 | 6.381855 | 6.100115  |
| ENSMUSG Cnbd2     | 1.245212 | 1.132995 | 1.122014 | 0.892467 | 1.118348 | 1.104389  |
| ENSMUSG Opa1      | 13.4064  | 13.76805 | 11.04963 | 13.51182 | 12.18636 | 14.044269 |
| ENSMUSG Hspb2     | 7.455468 | 7.97563  | 9.146372 | 8.628212 | 5.913785 | 5.090543  |
| ENSMUSG Zfyve28   | 0.458973 | 0.17244  | 0.506384 | 0.766982 | 0.629823 | 0.810273  |
| ENSMUSG Fgf2      | 5.414863 | 6.41558  | 5.035114 | 4.095954 | 3.157666 | 3.459129  |
| ENSMUSG Mospd3    | 17.71251 | 15.27504 | 20.02161 | 19.72238 | 18.25683 | 18.483659 |
| ENSMUSG Rnpc3     | 5.554015 | 8.940734 | 8.526553 | 6.304379 | 5.169804 | 6.587292  |
| ENSMUSG Cyp2u1    | 0.350938 | 0.388274 | 0.46446  | 0.54576  | 0.222001 | 0.170387  |
| ENSMUSG Hadh      | 41.52583 | 40.97507 | 36.49535 | 40.34354 | 40.4971  | 40.719475 |
| ENSMUSG Lef1      | 4.008609 | 2.745604 | 3.786898 | 2.05406  | 1.588467 | 1.489181  |
| ENSMUSG Olfr1100  | 0        | 0        | 0        | 0        | 0        | 0         |
| ENSMUSG Ldlrad1   | 4.505529 | 5.904553 | 3.240313 | 6.447354 | 7.575985 | 7.455077  |
| ENSMUSG Cryge     | 0        | 0        | 0        | 0        | 0        | 0         |
| ENSMUSG Ccnyl1    | 8.61055  | 9.908923 | 8.755916 | 6.606383 | 8.041637 | 7.724425  |
| ENSMUSG Lilra5    | 9.198785 | 9.023628 | 10.39558 | 9.462881 | 8.77277  | 7.740073  |
| ENSMUSG Cdk3-ps   | 0.157618 | 0.072686 | 0.312578 | 0.232593 | 0        | 0         |

|                  |          |          |          |          |          |           |
|------------------|----------|----------|----------|----------|----------|-----------|
| ENSMUSG Prps11l  | 0        | 0        | 0.01512  | 0.021181 | 0.066835 | 0         |
| ENSMUSG Muc6     | 0.019948 | 0.049339 | 0.116135 | 0.045446 | 0.068506 | 0.042045  |
| ENSMUSG Zer1     | 9.290192 | 8.094409 | 8.018417 | 7.266535 | 7.703655 | 7.559086  |
| ENSMUSG Mrps6    | 8.763165 | 12.00221 | 10.03082 | 12.35994 | 10.738   | 10.109024 |
| ENSMUSG Lap3     | 17.65872 | 18.98788 | 29.483   | 32.75296 | 27.12431 | 29.460909 |
| ENSMUSG Sdk1     | 0.600567 | 0.69311  | 0.598383 | 0.616209 | 0.566119 | 0.626895  |
| ENSMUSG Car15    | 0.410938 | 0.537504 | 0.356696 | 0.317718 | 0.706031 | 0.671495  |
| ENSMUSG Cfb      | 22.65056 | 35.03157 | 27.04439 | 33.75658 | 40.62948 | 43.424825 |
| ENSMUSG Elf4     | 9.175968 | 7.365568 | 10.13955 | 9.784977 | 9.769609 | 10.887177 |
| ENSMUSG Sash3    | 9.806293 | 8.019038 | 12.03075 | 15.56892 | 15.66971 | 17.661823 |
| ENSMUSG Rbmx2    | 2.908621 | 2.384418 | 2.938348 | 2.504557 | 2.376453 | 1.688251  |
| ENSMUSG Msto1    | 8.474913 | 7.442352 | 8.427562 | 7.980575 | 7.338217 | 7.531426  |
| ENSMUSG Dap3     | 6.256323 | 6.387483 | 7.753322 | 6.994512 | 7.427669 | 7.202778  |
| ENSMUSG Rab33a   | 0.041081 | 0.060898 | 0        | 0.080997 | 0.037887 | 0.136947  |
| ENSMUSG Gm20772  | 0        | 0        | 0        | 0        | 0        | 0         |
| ENSMUSG Zswim2   | 0        | 0        | 0        | 0.087936 | 0.023178 | 0.0251    |
| ENSMUSG Hdx      | 0.544642 | 0.485716 | 0.37174  | 0.314448 | 0.370976 | 0.289281  |
| ENSMUSG Zfyve9   | 7.869534 | 8.418829 | 7.468325 | 5.125461 | 5.227389 | 5.177948  |
| ENSMUSG Tex16    | 0        | 0        | 0        | 0        | 0        | 0         |
| ENSMUSG Exosc2   | 7.312322 | 6.390301 | 7.41698  | 6.038526 | 6.86068  | 6.280335  |
| ENSMUSG Dpy19l3  | 2.049674 | 1.732784 | 1.710168 | 2.112983 | 2.316563 | 2.51999   |
| ENSMUSG Smarcal1 | 7.577555 | 8.699898 | 8.438165 | 8.106239 | 7.499462 | 7.851063  |
| ENSMUSG Arrdc5   | 0        | 0        | 0        | 0        | 0        | 0         |
| ENSMUSG 9830107B | 0.029876 | 0.086809 | 0.070109 | 0.178855 | 0.295624 | 0.252413  |
| ENSMUSG Them4    | 3.881038 | 3.419323 | 3.251001 | 2.396557 | 2.834453 | 2.240123  |
| ENSMUSG Zkscan1  | 6.865871 | 7.168789 | 6.195234 | 5.972224 | 5.555533 | 5.704849  |
| ENSMUSG Mepce    | 18.70484 | 17.41    | 18.85789 | 13.90938 | 14.97461 | 14.21865  |
| ENSMUSG Cyp3a13  | 0.306982 | 0.673928 | 0.416054 | 0.373169 | 0.246818 | 0.096842  |
| ENSMUSG Ppp1r35  | 12.66518 | 10.9834  | 13.20673 | 11.84663 | 12.39969 | 13.473726 |
| ENSMUSG Agfg2    | 7.734387 | 6.490824 | 8.226036 | 7.449558 | 7.13435  | 7.565191  |
| ENSMUSG Tsc22d4  | 15.79502 | 15.60714 | 15.90614 | 16.65441 | 15.07032 | 16.037094 |
| ENSMUSG Gm20605  | 15.90191 | 17.25915 | 16.23472 | 16.75335 | 13.96565 | 13.68815  |
| ENSMUSG H2a1j    | 0        | 0        | 0        | 0        | 0        | 0         |
| ENSMUSG Mkl1     | 7.258245 | 8.309294 | 7.388974 | 6.214584 | 6.126217 | 6.611138  |
| ENSMUSG Podxl    | 122.218  | 111.81   | 136.3043 | 62.6042  | 61.33696 | 63.078945 |
| ENSMUSG Copg2    | 11.72592 | 11.59569 | 10.48327 | 10.77042 | 11.86653 | 12.773701 |
| ENSMUSG Sry      | 0        | 0        | 0        | 0        | 0        | 0         |
| ENSMUSG Mfsd4b5  | 0.020928 | 0.051326 | 0.057995 | 0.056807 | 0.077406 | 0.150588  |
| ENSMUSG Zfp202   | 0.720135 | 0.574964 | 1.089957 | 0.877325 | 0.8261   | 1.314089  |
| ENSMUSG Tbx2r    | 7.01709  | 4.271795 | 5.839022 | 5.884425 | 2.828477 | 4.302555  |
| ENSMUSG Plek2    | 0.775776 | 0.61558  | 0.554192 | 0.451147 | 0.510426 | 0.915812  |
| ENSMUSG Lrr1     | 0.088625 | 0.164709 | 0.10643  | 1.04366  | 0.46293  | 0.90443   |
| ENSMUSG Vrk1     | 8.168606 | 7.816622 | 6.301624 | 7.672779 | 8.786988 | 7.788782  |
| ENSMUSG Atp6v1d  | 13.21253 | 13.54522 | 14.07678 | 13.39115 | 13.77405 | 13.260732 |
| ENSMUSG Eif2s1   | 11.66206 | 10.65826 | 10.5795  | 12.1968  | 12.39393 | 12.503839 |
| ENSMUSG Papola   | 35.29027 | 35.82273 | 35.69805 | 38.03439 | 40.23633 | 35.899439 |
| ENSMUSG Snapc1   | 4.578767 | 4.642465 | 5.288176 | 4.300473 | 3.839331 | 3.736507  |
| ENSMUSG Mpp5     | 28.9161  | 30.17402 | 25.90897 | 17.06668 | 18.37477 | 16.000089 |
| ENSMUSG Kif9     | 2.401551 | 3.291269 | 2.080796 | 2.849083 | 2.517892 | 3.708771  |
| ENSMUSG Ptgs2    | 8.346898 | 5.597929 | 5.737363 | 4.743552 | 4.507972 | 5.700054  |
| ENSMUSG Scap     | 19.1449  | 17.96921 | 18.97611 | 18.72456 | 17.60941 | 20.180317 |
| ENSMUSG Ngp      | 0.654109 | 0.624308 | 1.383424 | 1.358382 | 0.12986  | 0.433034  |
| ENSMUSG Cspg5    | 0.040406 | 0.286718 | 0.040854 | 0.2764   | 0.25746  | 0.222461  |
| ENSMUSG Smarcc1  | 7.609904 | 8.280064 | 7.758328 | 9.92794  | 9.061398 | 9.264445  |
| ENSMUSG Dhx30    | 17.35018 | 18.43678 | 17.33192 | 13.50871 | 13.65324 | 14.023327 |
| ENSMUSG Ccdc2    | 0.646405 | 1.116484 | 0.698948 | 1.349361 | 0.475203 | 0.979146  |
| ENSMUSG Kcnc2    | 0.063981 | 0.134618 | 0.05899  | 0.138721 | 0.026047 | 0.047379  |
| ENSMUSG Melk     | 0.224047 | 0.309089 | 0.340188 | 1.086084 | 1.075992 | 1.963781  |
| ENSMUSG Thrsp    | 5.997422 | 17.41036 | 3.975357 | 13.28778 | 5.57504  | 9.084261  |
| ENSMUSG Dmgdh    | 0        | 0        | 0        | 0        | 0        | 0         |
| ENSMUSG Inpp5f   | 7.101563 | 6.380872 | 6.632656 | 5.897199 | 6.130046 | 5.718676  |
| ENSMUSG Ugg2     | 2.057686 | 1.632079 | 1.858376 | 1.199326 | 1.327609 | 1.317876  |
| ENSMUSG Pnoc     | 0.146169 | 0        | 0        | 0.024203 | 0        | 0.114935  |
| ENSMUSG Adrb2    | 55.65783 | 48.3379  | 54.76291 | 18.77214 | 28.90116 | 21.034792 |

|                   |          |          |          |          |          |           |
|-------------------|----------|----------|----------|----------|----------|-----------|
| ENSMUSG Ankrd26   | 2.352035 | 2.635605 | 2.200314 | 2.224117 | 2.407456 | 2.04658   |
| ENSMUSG Tent5c    | 9.242612 | 11.27265 | 7.838997 | 29.51457 | 32.58527 | 28.776213 |
| ENSMUSG Tnfaip8l1 | 0.895738 | 0.645777 | 0.764651 | 1.083742 | 1.147699 | 1.337925  |
| ENSMUSG Gm10229   | 0        | 0        | 0        | 0        | 0        | 0         |
| ENSMUSG Gm10228   | 0        | 0        | 0        | 0        | 0        | 0         |
| ENSMUSG Gm6358    | 0        | 0        | 0        | 0        | 0        | 0         |
| ENSMUSG Shisa2    | 2.034405 | 2.121394 | 2.461409 | 1.961043 | 1.802338 | 1.735272  |
| ENSMUSG 1110025L1 | 0        | 0        | 0        | 0        | 0        | 0         |
| ENSMUSG Rnf144a   | 38.0181  | 41.06148 | 36.44939 | 27.25395 | 30.50539 | 28.286447 |
| ENSMUSG Itsn2     | 25.40355 | 24.96854 | 24.58874 | 24.57712 | 24.85615 | 25.806793 |
| ENSMUSG Rsad2     | 2.051119 | 1.853262 | 3.499954 | 1.342825 | 1.699452 | 1.14636   |
| ENSMUSG Mboat2    | 2.276197 | 2.62452  | 2.595976 | 1.669863 | 1.940474 | 2.01456   |
| ENSMUSG Ncoa1     | 9.433217 | 10.35119 | 8.872042 | 8.74475  | 8.56294  | 9.73206   |
| ENSMUSG Id2       | 52.35    | 43.59997 | 53.63926 | 46.88781 | 41.61802 | 55.941069 |
| ENSMUSG Dus4l     | 2.010971 | 2.696104 | 2.323944 | 1.93155  | 2.348343 | 2.409588  |
| ENSMUSG Rrm2      | 2.099625 | 1.972272 | 1.975723 | 7.534499 | 8.567735 | 9.026116  |
| ENSMUSG Nxpe3     | 3.30732  | 3.479247 | 5.131475 | 3.958516 | 3.769468 | 2.95631   |
| ENSMUSG C1galt1c1 | 19.78015 | 20.3504  | 21.99609 | 20.0402  | 20.20774 | 20.792587 |
| ENSMUSG Rbm38     | 8.020814 | 8.744601 | 10.98747 | 10.99929 | 10.2987  | 13.837502 |
| ENSMUSG Zfp958    | 4.137394 | 4.439    | 3.376536 | 3.646131 | 4.24009  | 3.268376  |
| ENSMUSG Zbp1      | 4.519167 | 3.884226 | 28.24801 | 14.04443 | 7.870382 | 10.991642 |
| ENSMUSG Nrsn1     | 0        | 0        | 0        | 0        | 0.021341 | 0         |
| ENSMUSG 1700021FC | 0        | 0        | 0        | 0        | 0        | 0         |
| ENSMUSG Kcnt1     | 0.023979 | 0.017475 | 0.044898 | 0.115765 | 0.165596 | 0.093925  |
| ENSMUSG Prr19     | 0        | 0        | 0        | 0        | 0.067149 | 0         |
| ENSMUSG Kcnj14    | 2.234776 | 2.168733 | 2.350424 | 1.491178 | 1.035686 | 1.530237  |
| ENSMUSG Krtap14   | 0        | 0        | 0        | 0        | 0        | 0         |
| ENSMUSG Ptar1     | 5.776546 | 6.470709 | 3.389404 | 5.136596 | 4.626198 | 6.058291  |
| ENSMUSG Fam122a   | 12.87807 | 10.50007 | 12.41157 | 10.14667 | 9.545111 | 12.646164 |
| ENSMUSG Pak6      | 6.616646 | 5.541644 | 4.960247 | 4.624746 | 5.486676 | 4.920351  |
| Mus_musc Mus_musc | 0.385001 | 0        | 0        | 0        | 0        | 0         |
| Mus_musc Mus_musc | 0        | 0        | 0.337872 | 0        | 0        | 0         |
| Mus_musc Mus_musc | 0.702964 | 1.138827 | 0.660111 | 1.07818  | 1.275891 | 1.459378  |
| Mus_musc Mus_musc | 0        | 0        | 0        | 0        | 0.219042 | 0         |
| Mus_musc Mus_musc | 0.116703 | 0.033545 | 0.144942 | 0.168468 | 0.12719  | 0.470609  |
| ENSMUSG Bex1      | 2.684044 | 3.990213 | 3.263628 | 5.309558 | 4.654181 | 6.702864  |
| ENSMUSG Cntf      | 0.137603 | 0.699785 | 0.191011 | 0.548402 | 0.635589 | 0.653149  |
| ENSMUSG 4930455Hl | 0        | 0        | 0.019594 | 0        | 0        | 0         |
| ENSMUSG Insr      | 11.61111 | 11.86992 | 9.255244 | 9.057964 | 9.393808 | 9.343995  |
| ENSMUSG Gpr171    | 1.297206 | 0.998468 | 1.485196 | 1.668131 | 1.715304 | 2.194672  |
| ENSMUSG Igf1r     | 8.968419 | 9.11011  | 7.708369 | 5.920012 | 6.208498 | 5.439831  |
| ENSMUSG Gm44502   | 2.455307 | 1.859834 | 2.962966 | 1.390277 | 2.301688 | 1.757392  |
| ENSMUSG Pck2      | 10.00621 | 8.56734  | 8.751155 | 12.5209  | 11.03639 | 12.483185 |
| ENSMUSG Tmem51    | 6.582103 | 5.838487 | 7.86801  | 8.805403 | 7.623718 | 9.074832  |
| ENSMUSG Nlrp9c    | 0        | 0        | 0        | 0        | 0        | 0         |
| ENSMUSG Apobec1   | 5.018349 | 3.461554 | 7.743219 | 21.698   | 19.19409 | 22.339903 |
| ENSMUSG lldr2     | 1.918103 | 2.305674 | 1.23909  | 1.440826 | 1.068795 | 1.754826  |
| ENSMUSG Tlx3      | 0        | 0        | 0        | 0        | 0        | 0         |
| ENSMUSG Nap1l2    | 0.167741 | 0.071614 | 0.082926 | 0.1306   | 0.187374 | 0.028618  |
| ENSMUSG Ceacam5   | 0        | 0        | 0        | 0        | 0        | 0         |
| ENSMUSG Gm21118   | 0        | 0        | 0        | 0        | 0        | 0         |
| ENSMUSG Scgb2b7   | 0        | 0        | 0        | 0        | 0        | 0         |
| ENSMUSG Arid3b    | 7.638934 | 6.00426  | 6.855546 | 6.734538 | 6.694834 | 6.042258  |
| ENSMUSG Polr2e    | 50.1908  | 45.45313 | 49.9252  | 44.17134 | 45.45593 | 50.388817 |
| ENSMUSG Rita1     | 4.362833 | 5.297407 | 4.899431 | 4.881129 | 4.413452 | 4.481837  |
| ENSMUSG Abca13    | 0.057674 | 0.041866 | 0.016882 | 0.02478  | 0.017327 | 0.02555   |
| ENSMUSG Retnlg    | 18.43628 | 9.949955 | 14.11714 | 78.5845  | 67.16311 | 82.305664 |
| ENSMUSG Retnlb    | 0        | 0        | 0        | 4.426411 | 4.617685 | 8.87402   |
| ENSMUSG Lancl3    | 0.098761 | 0.183501 | 0.163137 | 0.154221 | 0.105485 | 0.266242  |
| ENSMUSG Oas1b     | 0.413833 | 0.509548 | 0.765133 | 0.856345 | 0.321046 | 0.7198    |
| ENSMUSG Zfp286    | 0.685646 | 0.660758 | 0.717586 | 0.381969 | 0.386779 | 0.491412  |
| ENSMUSG Mettl21c  | 0        | 0        | 0        | 0.083162 | 0        | 0         |
| ENSMUSG Nr5a2     | 0.06281  | 0.146224 | 0.0721   | 0.132139 | 0.150679 | 0.084602  |
| ENSMUSG Cd55      | 24.11847 | 26.35799 | 20.54608 | 32.49263 | 31.96807 | 32.144374 |

|                   |          |          |          |          |          |           |
|-------------------|----------|----------|----------|----------|----------|-----------|
| ENSMUSG Nek7      | 30.13927 | 30.80108 | 28.58512 | 28.49251 | 30.09152 | 26.617669 |
| ENSMUSG Marco     | 0.825482 | 1.061888 | 0.815896 | 0        | 0.255744 | 0.190501  |
| ENSMUSG Atp6v1g3  | 0.020826 | 0        | 0        | 0.120437 | 0.106653 | 0.087164  |
| ENSMUSG Ptprc     | 29.39155 | 25.67222 | 44.60106 | 50.4386  | 42.00888 | 46.348106 |
| Mus_musc Mus_musc | 0        | 0.039834 | 0.047632 | 0.300058 | 0.124578 | 0.09695   |
| ENSMUSG Olfr453   | 0        | 0        | 0        | 0        | 0        | 0         |
| ENSMUSG Tcaim     | 4.030432 | 4.001679 | 3.644638 | 3.587632 | 3.349697 | 2.657628  |
| ENSMUSG Olfr965   | 0        | 0        | 0        | 0        | 0        | 0         |
| ENSMUSG Serpini1  | 0.337547 | 0.402992 | 0.531668 | 0.622599 | 0.565827 | 0.418662  |
| ENSMUSG Mink1     | 32.01851 | 29.50521 | 34.84865 | 32.34877 | 31.803   | 32.825634 |
| ENSMUSG Hrk       | 0        | 0.042175 | 0        | 0.043455 | 0.014743 | 0.020534  |
| Mus_musc Mus_musc | 0.189518 | 0        | 0.089286 | 0        | 0        | 0         |
| Mus_musc Mus_musc | 0        | 0        | 0.195402 | 0.123224 | 0        | 0         |
| Mus_musc Mus_musc | 0.367403 | 0        | 0        | 0        | 0        | 0         |
| Mus_musc Mus_musc | 0        | 0        | 0        | 0.201758 | 0        | 0         |
| Mus_musc Mus_musc | 0        | 0        | 0        | 0        | 0        | 0         |
| Mus_musc Mus_musc | 0        | 0        | 0        | 0.279303 | 0.268795 | 0         |
| Mus_musc Mus_musc | 2.553956 | 1.901812 | 2.484926 | 3.420619 | 3.493944 | 3.327469  |
| Mus_musc Mus_musc | 1.193573 | 1.486246 | 1.538665 | 1.120182 | 0.84275  | 0.497146  |
| Mus_musc Mus_musc | 0.814512 | 0.643684 | 0.734273 | 1.386575 | 1.071217 | 0.845806  |
| Mus_musc Mus_musc | 0.150397 | 0.417794 | 0.337041 | 0.445772 | 0.645753 | 0.497546  |
| Mus_musc Mus_musc | 0        | 0        | 0        | 0        | 0        | 0         |
| Mus_musc Mus_musc | 0.380693 | 0.214471 | 0.610111 | 0.411116 | 0.551649 | 0.154202  |
| Mus_musc Mus_musc | 5.312269 | 5.19918  | 4.968093 | 6.940423 | 5.841326 | 6.162523  |
| ENSMUSG Kif1c     | 60.1913  | 70.42368 | 61.46961 | 50.4904  | 53.61972 | 50.593819 |
| ENSMUSG Lonrf3    | 5.02837  | 5.852085 | 3.800653 | 5.618537 | 4.77465  | 5.680198  |
| ENSMUSG Cdca4     | 8.346039 | 9.634075 | 9.151124 | 9.12047  | 9.032605 | 10.178013 |
| ENSMUSG Gm16434   | 0        | 0        | 0        | 0        | 0        | 0         |
| ENSMUSG Gm20838   | 0        | 0        | 0        | 0        | 0        | 0         |
| ENSMUSG Layn      | 7.847152 | 6.910228 | 5.651774 | 4.177044 | 4.670424 | 5.604057  |
| Mus_musc Mus_musc | 0.225638 | 0.684024 | 0.315172 | 0.427753 | 0.756532 | 0.41958   |
| Mus_musc Mus_musc | 0        | 0.556671 | 0        | 215.7457 | 24.40797 | 80.36689  |
| Mus_musc Mus_musc | 0.282774 | 0.33527  | 0.067395 | 427.6223 | 154.3087 | 69.494999 |
| Mus_musc Mus_musc | 0        | 0        | 0        | 78.94512 | 0.618664 | 29.747486 |
| Mus_musc Mus_musc | 0        | 0        | 0        | 0        | 67.18118 | 27.181675 |
| Mus_musc Mus_musc | 0.34396  | 1.245765 | 0.077257 | 1.970914 | 2.03094  | 40.87191  |
| Mus_musc Mus_musc | 0        | 0.10398  | 0.282353 | 0.629128 | 0.861076 | 0.950676  |
| ENSMUSG Olfr190   | 0        | 0        | 0        | 0        | 0        | 0         |
| Mus_musc Mus_musc | 0.526582 | 1.024752 | 0.729248 | 454.0309 | 946.0303 | 53.781986 |
| ENSMUSG Olfr975   | 0        | 0        | 0        | 0        | 0        | 0         |
| ENSMUSG Rhbdl2    | 0        | 0.195771 | 0.062188 | 0.318577 | 0.375993 | 0.65063   |
| ENSMUSG Tfpap2b   | 0        | 0        | 0        | 0        | 0        | 0         |
| ENSMUSG Filip1l   | 23.71872 | 24.40824 | 21.34615 | 20.25432 | 21.66313 | 22.880127 |
| Mus_musc Mus_musc | 0        | 0        | 0        | 0.237804 | 0        | 0         |
| Mus_musc Mus_musc | 0.106396 | 0.307423 | 0.291876 | 0.176645 | 0.454873 | 0.131256  |
| Mus_musc Mus_musc | 0        | 0        | 0        | 0.097289 | 0        | 0.393851  |
| Mus_musc Mus_musc | 0        | 0        | 0        | 0        | 0.342682 | 0         |
| ENSMUSG Olfr320   | 0.000372 | 0        | 0        | 0        | 0        | 0         |
| ENSMUSG Ube2c     | 2.151667 | 1.409448 | 2.807799 | 7.94068  | 11.03705 | 10.55467  |
| ENSMUSG Olfr1368  | 0        | 0        | 0        | 0        | 0        | 0         |
| ENSMUSG Lce3c     | 0        | 0        | 0        | 0        | 0        | 0         |
| ENSMUSG Hcrt      | 0        | 0        | 0        | 0        | 0        | 0         |
| ENSMUSG Olfr459   | 0        | 0        | 0        | 0        | 0        | 0         |
| Mus_musc Mus_musc | 0.15808  | 0.30327  | 0.181576 | 0.101218 | 0.095374 | 0         |
| ENSMUSG Coa3      | 40.82737 | 40.3956  | 39.98275 | 36.77574 | 38.75573 | 40.344063 |
| Mus_musc Mus_musc | 0        | 0        | 0        | 0.246549 | 0.08817  | 0.082373  |
| Mus_musc Mus_musc | 0.263145 | 0        | 0        | 0        | 0        | 0.031672  |
| Mus_musc Mus_musc | 0.128455 | 0.237869 | 0.06526  | 0.367404 | 0.290252 | 0.291789  |
| Mus_musc Mus_musc | 0        | 0        | 0        | 0.241131 | 0        | 0         |
| Mus_musc Mus_musc | 0.558843 | 0.339621 | 0.647873 | 0.693061 | 0.500299 | 0.534159  |
| Mus_musc Mus_musc | 0.235081 | 0.306747 | 0.411831 | 0.566326 | 0.277654 | 0.388333  |
| Mus_musc Mus_musc | 2.885723 | 3.620324 | 3.357735 | 2.394697 | 2.181564 | 2.739886  |
| ENSMUSG Aoc3      | 0.967803 | 1.532    | 0.685388 | 2.570864 | 2.069283 | 1.957057  |
| ENSMUSG Noxo1     | 1.060174 | 0.556449 | 0.899026 | 1.929388 | 1.894936 | 1.755966  |

|                    |          |          |          |          |          |           |
|--------------------|----------|----------|----------|----------|----------|-----------|
| ENSMUSG Olfr826    | 0        | 0        | 0        | 0        | 0        | 0         |
| ENSMUSG Tnip2      | 12.66714 | 12.67999 | 14.84516 | 11.8133  | 12.31813 | 13.034832 |
| ENSMUSG Olfr960    | 0        | 0        | 0        | 0        | 0        | 0         |
| ENSMUSG Olfr1393   | 0        | 0        | 0.054146 | 0.017127 | 0        | 0         |
| ENSMUSG Grwd1      | 3.45812  | 3.834058 | 4.657862 | 4.246719 | 3.647736 | 4.261014  |
| ENSMUSG Tinf2      | 9.824594 | 8.950183 | 8.995898 | 9.17525  | 9.503618 | 8.140104  |
| Mus_musc Mus_musc  | 1.387397 | 1.194716 | 0.534733 | 0.969067 | 1.136053 | 0.706546  |
| Mus_musc Mus_musc  | 0.670373 | 0.405595 | 0.549543 | 0.301262 | 0.614683 | 0         |
| Mus_musc Mus_musc  | 0        | 0.424174 | 0        | 0        | 0        | 0         |
| Mus_musc Mus_musc  | 0.508821 | 0.703286 | 0.795509 | 0.54938  | 0.380473 | 0.408448  |
| ENSMUSG Gm14393    | 0.348385 | 0.529763 | 0.238132 | 0.161675 | 0        | 0.313471  |
| ENSMUSG Gm14444    | 0.030895 | 0        | 0.027114 | 0.101343 | 0        | 0         |
| ENSMUSG Fam186b    | 0        | 0.197236 | 0.280983 | 0.188025 | 0.017574 | 0.120408  |
| ENSMUSG Gm14440    | 0.757534 | 0.763847 | 0.789568 | 0.704908 | 0.637073 | 0.830406  |
| ENSMUSG Gm14443    | 0.106798 | 0.262156 | 0.097636 | 0.112594 | 0.108022 | 0.118644  |
| ENSMUSG Gm14391    | 1.125346 | 0.999822 | 0.971744 | 0.821657 | 1.590176 | 1.364208  |
| ENSMUSG Cops6      | 28.69903 | 30.61379 | 31.33826 | 29.9004  | 28.04445 | 31.652539 |
| ENSMUSG Mon1b      | 6.541299 | 6.691706 | 6.130964 | 6.422994 | 6.687402 | 6.252687  |
| ENSMUSG Tubgcp3    | 12.51207 | 12.84903 | 11.31819 | 11.92362 | 10.83255 | 11.404158 |
| ENSMUSG Serpinf1   | 12.61872 | 16.23629 | 8.901418 | 11.91395 | 10.87978 | 10.57063  |
| ENSMUSG Rpa1       | 12.69112 | 12.20693 | 12.20619 | 10.40812 | 11.01991 | 12.202675 |
| Mus_musc Mus_musc  | 1.609    | 1.984166 | 1.537303 | 0.992435 | 1.477485 | 1.794837  |
| Mus_musc Mus_musc  | 0        | 0        | 0        | 0        | 0        | 0.368372  |
| Mus_musc Mus_musc  | 1.102295 | 6.463222 | 8.132671 | 13.26287 | 0.334561 | 0         |
| Mus_musc Mus_musc  | 0        | 0.213385 | 0.081959 | 0.203306 | 0        | 0         |
| ENSMUSG Gm26965    | 0        | 0        | 0        | 0        | 0        | 0         |
| ENSMUSG Mlf2       | 114.127  | 113.0966 | 116.6331 | 109.7187 | 103.1113 | 103.41281 |
| ENSMUSG Saraf      | 88.18443 | 82.30093 | 92.30676 | 72.43193 | 72.17511 | 69.043945 |
| ENSMUSG Map6d1     | 0        | 0        | 0.028688 | 0        | 0        | 0.024259  |
| ENSMUSG Trir       | 61.62532 | 65.81316 | 79.13769 | 69.46341 | 68.23315 | 72.355286 |
| ENSMUSG Pla2g2d    | 1.330711 | 1.500826 | 1.104916 | 7.18042  | 5.319404 | 7.612832  |
| ENSMUSG Kif7       | 1.633467 | 1.463869 | 1.982484 | 1.144114 | 1.286792 | 1.311275  |
| ENSMUSG Rhox11     | 0        | 0        | 0        | 0        | 0        | 0         |
| ENSMUSG Cd79b      | 15.4344  | 9.337501 | 11.01832 | 35.46612 | 32.97103 | 35.546851 |
| ENSMUSG Hamp2      | 0        | 0        | 0        | 0.288829 | 0.417301 | 0.469327  |
| ENSMUSG Ces1d      | 400.9688 | 442.8637 | 362.11   | 250.4471 | 245.2041 | 218.58315 |
| ENSMUSG Magel2     | 0        | 0        | 0        | 0.037877 | 0        | 0         |
| ENSMUSG Myh8       | 0        | 0.00655  | 0        | 0        | 0        | 0         |
| ENSMUSG Galnt4     | 8.510852 | 9.344065 | 8.596457 | 8.008402 | 8.322612 | 7.743134  |
| Mus_musc Mus_musc  | 0.288601 | 0.071189 | 0.063592 | 0.214598 | 0.322038 | 0.32124   |
| Mus_musc Mus_musc  | 0        | 0        | 0.142388 | 0        | 0.273685 | 0.12903   |
| Mus_musc Mus_musc  | 0.285133 | 0.078674 | 0        | 0.106999 | 0        | 0         |
| Mus_musc Mus_musc  | 4.150386 | 4.809578 | 5.338231 | 5.62942  | 3.509653 | 3.619668  |
| ENSMUSG Fzd8       | 4.039277 | 4.438006 | 3.591632 | 2.956381 | 2.989984 | 2.998715  |
| ENSMUSG Wfdc5      | 0.04308  | 0.01781  | 0        | 0.103578 | 0        | 0.127855  |
| ENSMUSG Hs2st1     | 40.0353  | 35.07705 | 32.09666 | 21.93888 | 22.53025 | 23.343624 |
| ENSMUSG Thbs1      | 24.05338 | 9.296487 | 15.19641 | 14.86383 | 18.64497 | 20.719725 |
| ENSMUSG Vmn2r62    | 0        | 0        | 0        | 0        | 0        | 0         |
| ENSMUSG Vmn1r185   | 0        | 0        | 0        | 0        | 0        | 0         |
| ENSMUSG Tax1bp3    | 48.77858 | 55.02502 | 57.56846 | 39.5776  | 39.76144 | 47.018589 |
| ENSMUSG Gm17409    | 0        | 0        | 0        | 0        | 0        | 0         |
| Mus_musc Mus_musc  | 0.360402 | 0.178264 | 0.250091 | 0.433378 | 0.265116 | 0.243953  |
| Mus_musc Mus_musc  | 0.463176 | 0.82222  | 0.417208 | 1.065535 | 0.23467  | 0.964     |
| Mus_musc Mus_musc  | 0.16962  | 0        | 0.332923 | 0.432827 | 0.430673 | 0.626546  |
| Mus_musc Mus_musc  | 0        | 0        | 0.105405 | 0        | 0        | 0         |
| Mus_musc Mus_musc  | 0.178048 | 0.35794  | 0        | 0.237462 | 0.3855   | 0.137461  |
| ENSMUSG Olfr1511   | 0        | 0        | 0        | 0        | 0        | 0         |
| ENSMUSG Olfr1315-γ | 0        | 0        | 0        | 0        | 0        | 0         |
| Mus_musc Mus_musc  | 0.56265  | 0.547082 | 0.477365 | 0.321    | 0.286865 | 0.641414  |
| Mus_musc Mus_musc  | 0.283649 | 0.297315 | 0.560626 | 0.342251 | 0.352712 | 0.147945  |
| Mus_musc Mus_musc  | 0.500953 | 0.517964 | 0.577888 | 0.502312 | 0.531084 | 0.427992  |
| Mus_musc Mus_musc  | 0        | 0.450584 | 0.457729 | 0.253004 | 0        | 0.115289  |
| Mus_musc Mus_musc  | 0.807075 | 1.0315   | 0.419485 | 0.737554 | 0.783237 | 0.409883  |
| Mus_musc Mus_musc  | 0.894906 | 0.810971 | 0.73906  | 0.517534 | 0.964892 | 0.42314   |



|                          |          |          |          |          |          |           |
|--------------------------|----------|----------|----------|----------|----------|-----------|
| ENSMUSG Cc2d2b           | 0.043592 | 0.054958 | 0.01717  | 0.028978 | 0.029286 | 0.037054  |
| ENSMUSG Vmn1r15          | 0        | 0        | 0        | 0        | 0        | 0         |
| ENSMUSG Mast3            | 10.41483 | 10.20436 | 11.80975 | 11.71223 | 11.41084 | 12.926982 |
| ENSMUSG Ptgis            | 40.45813 | 38.57247 | 41.61454 | 27.73636 | 25.25631 | 25.821829 |
| ENSMUSG Necab2           | 0.158247 | 0.105111 | 0.249643 | 0.207305 | 0.20795  | 0.170111  |
| ENSMUSG Arid4b           | 14.96052 | 14.26832 | 12.86164 | 11.69928 | 12.41468 | 11.498839 |
| ENSMUSG Srrm2            | 60.04016 | 53.13432 | 59.13554 | 55.10407 | 47.16974 | 52.156671 |
| ENSMUSG Il18             | 13.48939 | 14.94469 | 13.65731 | 4.846953 | 3.787448 | 4.038789  |
| ENSMUSG Svs1             | 0        | 0        | 0        | 0        | 0        | 0         |
| ENSMUSG Gpatch2          | 4.982725 | 5.013475 | 4.02236  | 6.122937 | 5.29748  | 5.030142  |
| ENSMUSG Atp5l            | 76.38992 | 79.84748 | 86.01298 | 96.30817 | 87.14578 | 99.558174 |
| ENSMUSG Olfr1185- $\rho$ | 0        | 0        | 0        | 0        | 0        | 0         |
| ENSMUSG Olfr1424         | 0        | 0        | 0        | 0        | 0        | 0         |
| ENSMUSG Olfr1423         | 0        | 0        | 0        | 0        | 0        | 0         |
| ENSMUSG Sptan1           | 152.5164 | 136.5268 | 131.1208 | 85.6791  | 91.76393 | 88.99773  |
| ENSMUSG Olfr1428         | 0        | 0        | 0        | 0        | 0        | 0         |
| ENSMUSG Olfr1427         | 0        | 0        | 0        | 0        | 0        | 0         |
| ENSMUSG Olfr76           | 0        | 0        | 0        | 0        | 0        | 0         |
| ENSMUSG Tex22            | 0        | 0        | 0        | 0        | 0        | 0         |
| ENSMUSG Alox5ap          | 26.57331 | 24.35001 | 36.04879 | 31.80405 | 36.0177  | 41.589802 |
| ENSMUSG Gm19402          | 0        | 0        | 0        | 0        | 0        | 0         |
| ENSMUSG Bbs9             | 5.817736 | 6.436737 | 4.522517 | 4.995438 | 6.183699 | 5.613042  |
| ENSMUSG Vmn1r116         | 0        | 0        | 0        | 0        | 0        | 0         |
| ENSMUSG Cphx1            | 0        | 0        | 0        | 0        | 0        | 0         |
| ENSMUSG Gm5891           | 0        | 0        | 0        | 0        | 0        | 0         |
| ENSMUSG Dcdc2a           | 0.551901 | 1.042889 | 0.626336 | 1.24916  | 1.065984 | 1.033287  |
| ENSMUSG Gm21209          | 0        | 0        | 0        | 0        | 0        | 0         |
| ENSMUSG Cd276            | 2.336557 | 2.315528 | 1.877719 | 3.286873 | 2.431709 | 3.277496  |
| ENSMUSG Ptprq            | 0.200062 | 0.168774 | 0.158608 | 0.129906 | 0.063182 | 0.138495  |
| ENSMUSG Gm21292          | 0        | 0        | 0        | 0        | 0        | 0         |
| ENSMUSG Vmn2r115         | 0        | 0        | 0        | 0        | 0        | 0         |
| ENSMUSG Zc3h11a          | 11.72425 | 6.325592 | 15.7872  | 11.19327 | 10.42183 | 10.371191 |
| ENSMUSG Olfr813          | 0        | 0        | 0        | 0        | 0        | 0         |
| ENSMUSG Best2            | 0        | 0.033973 | 0        | 0.023601 | 0        | 0.069111  |
| ENSMUSG Atad2b           | 5.234738 | 6.124327 | 5.430766 | 6.421558 | 6.522232 | 6.083982  |
| ENSMUSG Shroom4          | 9.349155 | 9.494374 | 7.644022 | 5.915504 | 6.772235 | 6.381411  |
| ENSMUSG AC192777         | 0        | 0        | 0        | 0        | 0        | 0         |
| ENSMUSG Lrrn3            | 3.714509 | 3.602213 | 3.349831 | 2.351222 | 2.829222 | 2.06951   |
| ENSMUSG Gramd1c          | 3.311269 | 3.118902 | 2.44215  | 2.351434 | 1.631784 | 1.817038  |
| ENSMUSG Ap5m1            | 8.186101 | 7.423492 | 7.097792 | 7.927549 | 6.411772 | 6.761085  |
| ENSMUSG Slc2a13          | 1.260236 | 0.976096 | 0.908135 | 0.659323 | 1.095961 | 0.902868  |
| ENSMUSG BC031181         | 47.4642  | 49.43763 | 50.94934 | 50.45511 | 46.37794 | 49.674107 |
| ENSMUSG Rsbn1l           | 11.64056 | 11.88396 | 10.55848 | 9.870048 | 9.597492 | 8.941372  |
| ENSMUSG Zfp292           | 6.293423 | 6.268624 | 5.514245 | 5.998146 | 6.126504 | 5.870766  |
| ENSMUSG Rhou             | 3.228602 | 5.248249 | 3.908314 | 5.663486 | 5.265157 | 5.658261  |
| ENSMUSG Ccdc40           | 3.844953 | 4.896854 | 2.622277 | 5.025337 | 5.068829 | 4.95378   |
| ENSMUSG Olfr906          | 0        | 0        | 0        | 0        | 0        | 0         |
| ENSMUSG Snupn            | 5.936846 | 7.531979 | 5.284629 | 4.560637 | 5.631908 | 4.62816   |
| ENSMUSG Crybg1           | 3.720984 | 3.487798 | 4.172652 | 4.850241 | 3.691187 | 4.683404  |
| ENSMUSG Gje1             | 0        | 0        | 0        | 0        | 0        | 0         |
| ENSMUSG Rtn4ip1          | 1.902202 | 2.50011  | 2.306962 | 2.973481 | 2.859443 | 3.10639   |
| ENSMUSG Nmbr             | 0        | 0        | 0        | 0.023398 | 0        | 0         |
| ENSMUSG Qrs1             | 3.025968 | 2.984494 | 2.705451 | 3.583099 | 3.584757 | 2.407159  |
| ENSMUSG Gopc             | 12.69056 | 12.35701 | 11.55714 | 9.549134 | 9.537116 | 10.055794 |
| ENSMUSG Vta1             | 11.60551 | 11.20084 | 12.50485 | 12.01027 | 10.13853 | 11.260555 |
| ENSMUSG D10Wsu1C         | 0.20237  | 0.212915 | 0.186896 | 0.229175 | 0.227124 | 0.232303  |
| ENSMUSG Wdr82            | 25.28155 | 25.73192 | 26.13761 | 20.50335 | 21.33168 | 22.125419 |
| ENSMUSG Aldh1l2          | 0.161062 | 0.334117 | 0.178369 | 0.375808 | 0.30244  | 0.406345  |
| ENSMUSG Glt8d2           | 3.758555 | 3.626006 | 3.466807 | 2.153149 | 2.241854 | 1.906348  |
| ENSMUSG Txnrd1           | 30.47993 | 26.93152 | 26.75493 | 26.54861 | 27.7468  | 33.860636 |
| ENSMUSG Ppm1m            | 25.11332 | 23.39264 | 25.9511  | 23.05868 | 19.21419 | 22.359755 |
| ENSMUSG Glyctk           | 0.577764 | 0.447017 | 0.434281 | 0.540364 | 0.642352 | 0.414933  |
| ENSMUSG Helz             | 5.406196 | 5.580714 | 4.762892 | 5.099449 | 5.748146 | 5.355044  |
| ENSMUSG Vmn2r70          | 0        | 0        | 0        | 0        | 0        | 0         |

|                    |          |          |          |          |          |           |
|--------------------|----------|----------|----------|----------|----------|-----------|
| ENSMUSG Tnni3      | 2.31227  | 22.3746  | 4.411068 | 6.281792 | 5.820048 | 3.298987  |
| ENSMUSG Slc30a7    | 8.466365 | 8.37079  | 7.187803 | 9.511285 | 9.066874 | 9.208955  |
| ENSMUSG Cacng4     | 0.109004 | 0.079403 | 0.025534 | 0.014916 | 0.024483 | 0.047362  |
| ENSMUSG Cyp3a44    | 0        | 0        | 0        | 0        | 0        | 0         |
| ENSMUSG Cacng1     | 0.105081 | 0        | 0.074932 | 0        | 0        | 0         |
| ENSMUSG Faiml      | 0        | 0        | 0        | 0        | 0        | 0         |
| ENSMUSG Agl        | 3.655176 | 3.933312 | 3.011929 | 4.045493 | 3.27961  | 3.97742   |
| ENSMUSG Tbcc       | 11.23843 | 11.07394 | 9.497555 | 9.703942 | 10.6134  | 10.08309  |
| ENSMUSG Nudt15     | 1.251536 | 0.992943 | 0.783271 | 1.207076 | 1.156981 | 1.148655  |
| ENSMUSG Exoc1      | 8.879372 | 9.712743 | 8.125729 | 8.976949 | 8.742998 | 9.395063  |
| ENSMUSG Gm29289    | 0        | 0        | 0        | 0        | 0        | 0         |
| ENSMUSG Calm2      | 229.9979 | 228.3996 | 239.9268 | 199.3013 | 204.8521 | 213.03919 |
| ENSMUSG Olfr335-ps | 0        | 0.02465  | 0        | 0        | 0        | 0.029423  |
| ENSMUSG Atg14      | 7.53201  | 7.725482 | 6.303204 | 5.856392 | 6.211552 | 5.585693  |
| ENSMUSG Wfikkn1    | 0.10384  | 0.191318 | 0.025584 | 0.14339  | 0.142695 | 0.187905  |
| ENSMUSG Cks1brt    | 0        | 0        | 0        | 0        | 0        | 0         |
| ENSMUSG Mavs       | 12.8134  | 13.82594 | 12.76759 | 12.376   | 11.55788 | 12.629082 |
| ENSMUSG Gm10318    | 0        | 0        | 0        | 0        | 0        | 0         |
| ENSMUSG Atp5g2     | 67.29067 | 61.15663 | 67.56193 | 80.52594 | 67.27285 | 73.896394 |
| ENSMUSG Prss40     | 0        | 0        | 0        | 0        | 0        | 0         |
| ENSMUSG Gm28042    | 1.007324 | 1.091911 | 1.141995 | 1.234799 | 1.25988  | 1.172049  |
| ENSMUSG Dlx4       | 0.066577 | 0.040504 | 0.026651 | 0        | 0.023643 | 0         |
| ENSMUSG Cdc34b     | 0.30082  | 0.092438 | 0.02024  | 0        | 0.066804 | 0.066201  |
| ENSMUSG Slc35b1    | 23.12156 | 21.78368 | 25.43587 | 28.29411 | 29.79719 | 30.231262 |
| ENSMUSG Tac4       | 0        | 0.037005 | 0.14814  | 0.069551 | 0        | 0         |
| ENSMUSG Hoxb9      | 0        | 0        | 0        | 0.019403 | 0        | 0         |
| ENSMUSG Scrn2      | 4.531391 | 4.832105 | 5.358513 | 4.679596 | 5.228886 | 5.345721  |
| ENSMUSG Snx11      | 10.99913 | 11.08173 | 10.99837 | 11.66444 | 10.93937 | 11.215492 |
| ENSMUSG Lrrc46     | 1.869336 | 1.737019 | 1.478823 | 2.442869 | 2.818272 | 2.988617  |
| ENSMUSG Olfr1015   | 0        | 0        | 0        | 0        | 0        | 0         |
| ENSMUSG Ccnf       | 0.743072 | 0.455573 | 0.596325 | 1.170199 | 1.413586 | 1.656584  |
| ENSMUSG Ogfrl1     | 7.035439 | 5.968064 | 6.873441 | 6.191763 | 6.10847  | 5.244023  |
| ENSMUSG Agfg1      | 20.42924 | 21.15195 | 22.77704 | 14.75009 | 15.87407 | 15.873441 |
| ENSMUSG Mff        | 40.23769 | 39.14642 | 36.92112 | 33.74327 | 34.52758 | 33.840724 |
| ENSMUSG Fam135a    | 6.175369 | 7.470047 | 5.242408 | 4.813463 | 5.407105 | 5.19236   |
| ENSMUSG Sdhaf4     | 7.876672 | 10.89609 | 8.377057 | 9.547703 | 8.595775 | 8.902695  |
| ENSMUSG Smap1      | 23.16132 | 22.82149 | 22.91802 | 19.75318 | 22.09977 | 19.927904 |
| ENSMUSG B3gat2     | 0.967181 | 0.868362 | 1.495729 | 0.718961 | 0.712715 | 0.964844  |
| ENSMUSG Wnt5b      | 1.250944 | 1.315371 | 1.365953 | 0.807403 | 0.584487 | 0.64974   |
| ENSMUSG Klra5      | 0.111731 | 0.051155 | 0.073967 | 0        | 0.149179 | 0         |
| ENSMUSG Erc1       | 6.486725 | 5.823367 | 6.050161 | 5.131498 | 5.442457 | 5.345152  |
| ENSMUSG Ccdc77     | 3.555783 | 3.020848 | 4.060747 | 3.077896 | 2.400028 | 3.167218  |
| ENSMUSG Cyp4a10    | 0        | 0        | 0        | 0        | 0        | 0         |
| ENSMUSG Slc27a1    | 9.770642 | 9.389334 | 6.986207 | 12.50961 | 10.82125 | 11.29251  |
| ENSMUSG 1700018B(C | 0        | 0        | 0        | 0.107533 | 0        | 0.055314  |
| ENSMUSG B3gnt3     | 3.047225 | 3.247617 | 3.301085 | 3.568338 | 2.736892 | 2.93866   |
| ENSMUSG Pgls       | 35.06558 | 24.9524  | 32.89033 | 38.11556 | 43.98214 | 48.261725 |
| ENSMUSG Jak3       | 9.224142 | 7.069943 | 12.1477  | 13.34199 | 11.25549 | 12.710123 |
| ENSMUSG Ptpn3      | 6.42521  | 6.678969 | 5.892436 | 6.657382 | 6.793779 | 6.478744  |
| ENSMUSG Lmx1b      | 0        | 0.019088 | 0.016082 | 0.079197 | 0        | 0.010151  |
| ENSMUSG Gabpb2     | 10.96128 | 12.33999 | 9.884164 | 10.46175 | 10.67632 | 11.05778  |
| ENSMUSG Trhr       | 0        | 0        | 0        | 0        | 0        | 0         |
| ENSMUSG Abcf1      | 29.08091 | 26.95491 | 30.64907 | 29.30422 | 29.39106 | 29.017717 |
| ENSMUSG Alpk3      | 0.304706 | 0.458567 | 0.215434 | 0.152049 | 0.186253 | 0.106972  |
| ENSMUSG 9130409I2  | 0        | 0        | 0        | 0        | 0        | 0         |
| ENSMUSG Gpx2       | 12.57433 | 14.50102 | 8.965808 | 14.10827 | 11.4185  | 16.000729 |
| ENSMUSG Tubgcp4    | 5.475702 | 6.343042 | 5.074556 | 5.642953 | 6.644503 | 6.771692  |
| ENSMUSG Spata46    | 0.073164 | 0.219756 | 0.063543 | 0.199746 | 0.463704 | 0.040612  |
| ENSMUSG Olfr769    | 0        | 0        | 0        | 0        | 0        | 0         |
| Mus_musc Mus_musc  | 1.132314 | 1.108882 | 2.183406 | 1.802661 | 1.3733   | 1.267638  |
| ENSMUSG Gpr153     | 6.090012 | 6.300607 | 7.402171 | 4.488824 | 4.657297 | 5.338611  |
| ENSMUSG Hecw2      | 8.829248 | 8.480142 | 8.168584 | 4.391108 | 5.237397 | 4.183053  |
| ENSMUSG Raver2     | 16.15998 | 16.94401 | 16.62939 | 11.47625 | 11.28115 | 9.808728  |
| ENSMUSG Tpbg       | 0.625619 | 0.652013 | 0.494008 | 0.574741 | 0.443751 | 0.402367  |

|                   |          |          |          |          |          |           |
|-------------------|----------|----------|----------|----------|----------|-----------|
| ENSMUSG Arx       | 0        | 0        | 0        | 0        | 0        | 0         |
| ENSMUSG Impg2     | 0.168245 | 0.121409 | 0.111621 | 0.137212 | 0.129872 | 0.127941  |
| ENSMUSG Hpse      | 2.949957 | 2.460416 | 3.491816 | 6.036646 | 6.219168 | 8.086365  |
| ENSMUSG Tor1a     | 18.97581 | 15.93251 | 20.98975 | 17.94211 | 16.22425 | 18.803232 |
| ENSMUSG Abl1      | 25.12117 | 24.7337  | 22.97491 | 20.43641 | 19.71502 | 19.481359 |
| ENSMUSG Fubp3     | 14.37018 | 12.77223 | 13.85351 | 11.30364 | 11.15449 | 11.360334 |
| ENSMUSG Lamc3     | 2.550864 | 2.627527 | 2.74419  | 2.022352 | 2.949399 | 2.524065  |
| ENSMUSG Fibcd1    | 0        | 0.014746 | 0.010596 | 0.019229 | 0.020375 | 0         |
| ENSMUSG Tmem92    | 0        | 0        | 0        | 0        | 0        | 0         |
| ENSMUSG Ermp1     | 7.540306 | 7.452812 | 6.97959  | 6.548177 | 5.911215 | 6.079373  |
| ENSMUSG Insc      | 0.030137 | 0.476475 | 0.197495 | 0.127737 | 0.235839 | 0.78661   |
| ENSMUSG Hs3st2    | 0        | 0        | 0        | 0        | 0        | 0         |
| Mus_musc Mus_musc | 0.08626  | 0.283935 | 0.065773 | 0.143555 | 0.30765  | 0.195848  |
| ENSMUSG Dcun1d3   | 4.02235  | 4.950947 | 3.883938 | 3.5176   | 4.099289 | 3.303104  |
| ENSMUSG Exoc3l2   | 0.794995 | 0.825151 | 0.699742 | 0.77425  | 0.536508 | 0.619519  |
| ENSMUSG Slc25a23  | 16.26655 | 16.84585 | 14.48403 | 15.24813 | 16.10798 | 14.580386 |
| ENSMUSG Vmn1r125  | 0        | 0        | 0        | 0        | 0        | 0         |
| ENSMUSG Rilpl1    | 20.03765 | 20.52072 | 20.27298 | 13.87153 | 14.91259 | 13.665149 |
| ENSMUSG Tmed2     | 87.9077  | 87.44375 | 65.93701 | 94.20994 | 96.91932 | 80.576075 |
| ENSMUSG Rchy1     | 16.95115 | 15.70429 | 17.89682 | 17.77592 | 16.51995 | 16.481859 |
| ENSMUSG Cdk2ap1   | 28.44409 | 31.49081 | 33.58961 | 25.54424 | 26.34848 | 27.965571 |
| ENSMUSG Olfr1489  | 0        | 0        | 0        | 0        | 0        | 0         |
| ENSMUSG Pqlc3     | 30.00191 | 27.99925 | 27.80803 | 35.74428 | 34.63131 | 34.063943 |
| ENSMUSG Col27a1   | 2.227242 | 2.325937 | 2.711944 | 2.00777  | 1.413019 | 1.526633  |
| ENSMUSG Spred2    | 11.77319 | 10.53411 | 9.959933 | 7.690616 | 7.403454 | 7.641052  |
| ENSMUSG Nupl2     | 1.453372 | 1.829153 | 1.936273 | 2.154122 | 1.896138 | 2.280806  |
| ENSMUSG Olfr1352  | 0        | 0        | 0        | 0        | 0        | 0         |
| ENSMUSG C1qtnf2   | 10.17218 | 9.837758 | 12.48637 | 6.590238 | 5.031506 | 7.195112  |
| ENSMUSG Rnf222    | 0        | 0        | 0.014489 | 0        | 0        | 0.028827  |
| ENSMUSG Lor       | 0.965101 | 0.622008 | 0.482593 | 0.48165  | 0.222058 | 0.672451  |
| ENSMUSG Ggt1      | 0.77714  | 0.771522 | 0.521492 | 0.30461  | 0.235282 | 0.362348  |
| ENSMUSG Ggt5      | 1.521104 | 1.433101 | 1.446428 | 1.518636 | 1.699586 | 1.743036  |
| ENSMUSG Susd2     | 2.955737 | 3.430063 | 2.828837 | 3.42463  | 2.956683 | 3.422968  |
| ENSMUSG Fthl17a   | 0        | 0        | 0        | 0        | 0        | 0         |
| ENSMUSG Tgfb1     | 24.00184 | 20.52007 | 26.45411 | 26.42644 | 32.69606 | 29.687602 |
| ENSMUSG Tstd2     | 7.212714 | 8.843081 | 7.707141 | 7.929007 | 8.445468 | 10.015469 |
| ENSMUSG Esm1      | 11.60792 | 6.382752 | 5.750194 | 2.92533  | 2.99696  | 2.173082  |
| ENSMUSG Fam83g    | 1.299288 | 1.241437 | 1.133866 | 1.391984 | 1.511767 | 1.49288   |
| ENSMUSG Wdr27     | 0.156663 | 0.173334 | 0.238239 | 0.191206 | 0.238423 | 0.242075  |
| ENSMUSG Dmrt3     | 0        | 0.015366 | 0        | 0.062107 | 0        | 0.015875  |
| ENSMUSG Slc5a10   | 0.0184   | 0.052033 | 0        | 0        | 0        | 0         |
| ENSMUSG 1110017D  | 6.690837 | 9.164543 | 5.859369 | 8.652006 | 8.230509 | 9.016601  |
| ENSMUSG Nudt2     | 6.065182 | 6.489115 | 6.738221 | 8.191012 | 6.660313 | 8.602915  |
| ENSMUSG Cntfr     | 3.023866 | 3.491429 | 2.701708 | 1.497324 | 1.348302 | 1.191348  |
| ENSMUSG Enh1      | 10.68668 | 8.984739 | 10.19863 | 4.452427 | 5.314479 | 4.634411  |
| ENSMUSG Dctn3     | 29.72299 | 30.17165 | 30.83186 | 28.95646 | 27.70072 | 29.723432 |
| ENSMUSG Bmp8a     | 0.029426 | 0.235368 | 0.021073 | 0.358653 | 0.24084  | 0.159756  |
| ENSMUSG Mier3     | 6.596511 | 6.378634 | 5.496357 | 4.033267 | 4.316758 | 4.774788  |
| ENSMUSG Abtb2     | 1.32773  | 1.352119 | 1.632061 | 1.83366  | 1.935366 | 1.818263  |
| ENSMUSG Folr2     | 1.880467 | 2.701905 | 1.768777 | 7.501262 | 8.684247 | 9.630862  |
| ENSMUSG Olfr492   | 0        | 0        | 0        | 0        | 0        | 0         |
| ENSMUSG Frg2f1    | 0.47653  | 0.856905 | 1.079103 | 0.83845  | 0.675476 | 0.585942  |
| Mus_musc Mus_musc | 0        | 0.402333 | 0.28884  | 0.318747 | 0.109283 | 0.209343  |
| Mus_musc Mus_musc | 1.15585  | 1.358515 | 0.84715  | 1.928951 | 1.357131 | 1.617722  |
| ENSMUSG Gm10645   | 0.035067 | 0.050163 | 0        | 0.368024 | 0.148219 | 1.019202  |
| ENSMUSG Cypt15    | 0        | 0        | 0        | 0        | 0        | 0         |
| ENSMUSG Zfp568    | 6.565823 | 7.445924 | 6.581985 | 6.239586 | 5.778408 | 6.386787  |
| ENSMUSG Zfp382    | 1.998777 | 1.250859 | 2.014293 | 1.948613 | 2.816528 | 2.114702  |
| ENSMUSG Rhoq      | 16.42235 | 17.18166 | 17.04073 | 18.44771 | 18.96311 | 18.515032 |
| ENSMUSG Seh1l     | 21.53824 | 20.88872 | 19.74187 | 16.40764 | 16.13264 | 15.201548 |
| ENSMUSG Pigf      | 6.484541 | 6.506393 | 6.764683 | 6.678046 | 4.984708 | 4.56109   |
| ENSMUSG Spint2    | 159.7664 | 136.1    | 118.1727 | 126.9191 | 141.1848 | 140.48066 |
| ENSMUSG Cript     | 24.93124 | 26.96672 | 25.39228 | 25.88916 | 24.95954 | 23.20529  |
| ENSMUSG Nhirc1    | 3.387681 | 4.257497 | 3.277833 | 2.69194  | 2.020493 | 2.494222  |

|                    |          |          |          |          |          |           |
|--------------------|----------|----------|----------|----------|----------|-----------|
| ENSMUSG Cfhr2      | 0.134932 | 0.211324 | 0.081528 | 0.277878 | 0.438097 | 0.60559   |
| ENSMUSG Acta2      | 71.77648 | 59.57143 | 67.19281 | 95.71811 | 106.9885 | 102.3986  |
| ENSMUSG Cstf1      | 7.363844 | 7.081872 | 7.331032 | 6.550812 | 6.954595 | 8.077815  |
| ENSMUSG Pkia       | 7.968713 | 8.966507 | 7.884071 | 7.055873 | 5.967243 | 7.350998  |
| ENSMUSG Aurka      | 0.990945 | 0.97964  | 1.028859 | 2.863854 | 3.133761 | 3.352051  |
| ENSMUSG Fam210b    | 10.77487 | 11.66347 | 10.40305 | 11.0207  | 12.08726 | 11.238009 |
| ENSMUSG E2f1       | 2.430925 | 2.6402   | 2.967794 | 3.441033 | 4.471419 | 3.864317  |
| ENSMUSG Tram2      | 5.868394 | 5.867852 | 5.821271 | 8.379554 | 9.487764 | 7.87111   |
| ENSMUSG Cir1       | 10.10164 | 11.35317 | 11.66913 | 10.67725 | 11.0588  | 9.174112  |
| ENSMUSG Mapk1ip1   | 9.556351 | 8.928108 | 10.68125 | 8.106253 | 7.504836 | 8.341107  |
| ENSMUSG Ydjc       | 1.052129 | 0.738271 | 0.87009  | 0.904869 | 1.189411 | 1.012851  |
| ENSMUSG Enc1       | 5.638918 | 5.134782 | 5.764942 | 5.642245 | 5.347039 | 5.288599  |
| ENSMUSG Cmtm2b     | 0        | 0.052605 | 0.01747  | 0        | 0        | 0         |
| ENSMUSG Slc24a4    | 8.54838  | 9.03729  | 8.664137 | 5.878479 | 6.299178 | 6.301455  |
| ENSMUSG Spag11b    | 0        | 0        | 0        | 0        | 0        | 0         |
| ENSMUSG Olfr286    | 0        | 0        | 0        | 0        | 0        | 0         |
| ENSMUSG Ii2        | 0        | 0        | 0.124192 | 0.085791 | 0        | 0.062469  |
| ENSMUSG Spata5     | 3.129602 | 3.170748 | 3.090679 | 2.977392 | 3.070459 | 3.357578  |
| ENSMUSG Trim32     | 7.039169 | 6.893503 | 7.086391 | 5.180043 | 6.168    | 5.975074  |
| ENSMUSG Dcun1d4    | 6.997112 | 7.26117  | 5.86314  | 4.942124 | 5.173271 | 5.359565  |
| ENSMUSG Pcdhb6     | 0.142095 | 0.401498 | 0.151359 | 0.178449 | 0.229598 | 0.142499  |
| ENSMUSG Agrp       | 1.237149 | 0.355428 | 1.04241  | 0.801399 | 0.872295 | 0.975817  |
| ENSMUSG Slc7a7     | 7.624416 | 10.20891 | 8.110069 | 10.36756 | 11.3815  | 11.383332 |
| ENSMUSG Oxa1l      | 18.7599  | 19.06363 | 18.84085 | 19.18981 | 18.55775 | 19.008006 |
| ENSMUSG Fbxl19     | 6.312569 | 5.926734 | 7.22916  | 6.4236   | 5.920851 | 6.828132  |
| ENSMUSG Rnf40      | 14.94205 | 14.46103 | 14.50953 | 14.31515 | 13.47328 | 13.483008 |
| ENSMUSG Mterf1a    | 1.634934 | 2.219801 | 1.41108  | 1.780675 | 1.87779  | 1.870086  |
| ENSMUSG Bcl7c      | 13.1706  | 8.579291 | 9.889574 | 10.17964 | 12.02449 | 12.60288  |
| ENSMUSG Phkg2      | 12.7658  | 11.85464 | 15.09264 | 12.87173 | 11.14797 | 11.987177 |
| ENSMUSG Hipk4      | 0.273279 | 0.404184 | 0.471784 | 0.347695 | 0.19282  | 0.227763  |
| ENSMUSG Cdh18      | 0        | 0        | 0        | 0        | 0        | 0         |
| ENSMUSG Rc3h1      | 8.643649 | 9.627672 | 7.937874 | 7.778669 | 8.225919 | 8.151514  |
| ENSMUSG Fbl        | 21.12126 | 23.22303 | 26.11225 | 24.3571  | 22.2684  | 26.815792 |
| ENSMUSG Pramef8    | 4.692401 | 4.308941 | 4.385762 | 3.8031   | 3.794687 | 3.703571  |
| ENSMUSG Hectd3     | 16.54197 | 15.17027 | 15.27481 | 12.28308 | 13.4944  | 13.725935 |
| ENSMUSG Chit1      | 0        | 0        | 0        | 0        | 0        | 0         |
| ENSMUSG Elobl      | 0        | 0        | 0        | 0        | 0        | 0         |
| ENSMUSG Syt2       | 0.051115 | 0.086316 | 0.021808 | 0        | 0.012674 | 0.046241  |
| ENSMUSG Kih12      | 5.704201 | 6.105438 | 5.888037 | 4.400717 | 5.24392  | 5.113677  |
| ENSMUSG Adipor1    | 56.31511 | 56.32564 | 58.93362 | 49.66077 | 53.36531 | 51.598491 |
| ENSMUSG Cyb5r1     | 18.04504 | 15.9934  | 17.64846 | 13.1972  | 18.75963 | 14.791463 |
| ENSMUSG Myog       | 0        | 0        | 0        | 0        | 0        | 0.034004  |
| ENSMUSG Ppfia4     | 0.819452 | 0.673803 | 1.130369 | 1.640095 | 1.194345 | 1.746233  |
| ENSMUSG Vpreb2     | 0        | 0        | 0        | 0        | 0        | 0         |
| ENSMUSG Cdyl       | 6.296923 | 5.282413 | 6.178403 | 4.196704 | 5.079755 | 3.894053  |
| ENSMUSG Sav1       | 40.22069 | 42.55995 | 44.42837 | 32.31723 | 35.0027  | 30.9035   |
| Mus_musc Mus_musc  | 0.376063 | 0        | 0        | 0        | 0        | 0.237852  |
| Mus_musc Mus_musc  | 0        | 0        | 0.081119 | 0        | 0.186692 | 0         |
| ENSMUSG Olfr564    | 0        | 0        | 0        | 0        | 0        | 0         |
| ENSMUSG Cbx6       | 24.6544  | 23.98539 | 23.74504 | 19.79502 | 21.103   | 19.888545 |
| ENSMUSG Olfr275    | 0        | 0        | 0        | 0        | 0        | 0         |
| ENSMUSG Olfr101    | 0        | 0.008242 | 0        | 0.030817 | 0.038458 | 0         |
| Mus_musc Mus_musc  | 0.203605 | 0        | 0        | 0        | 0        | 0         |
| ENSMUSG Musk       | 0        | 0.013483 | 0.056279 | 0.090568 | 0.031752 | 0.031649  |
| ENSMUSG St6galnac2 | 12.36477 | 12.80442 | 13.60166 | 13.37868 | 13.25458 | 14.138433 |
| ENSMUSG Wnt11      | 4.090536 | 4.232127 | 3.024952 | 2.912773 | 3.812609 | 3.596461  |
| ENSMUSG Ncf1       | 13.81959 | 13.02927 | 15.62763 | 42.35433 | 37.34201 | 46.317568 |
| ENSMUSG 4921511M   | 0        | 0        | 0        | 0        | 0        | 0         |
| ENSMUSG Gm20738    | 0        | 0        | 0        | 0        | 0        | 0         |
| ENSMUSG Gm20931    | 0        | 0        | 0        | 0        | 0        | 0         |
| ENSMUSG Mmgt1      | 12.44507 | 12.8558  | 11.54224 | 10.9087  | 11.24647 | 11.593445 |
| ENSMUSG Gm3187     | 0        | 0        | 0        | 0        | 0        | 0         |
| Mus_musc Mus_musc  | 0        | 0.358559 | 0        | 0        | 0        | 0.099126  |
| Mus_musc Mus_musc  | 0        | 0        | 0.204577 | 0        | 0        | 0         |

|                   |          |          |          |          |          |           |
|-------------------|----------|----------|----------|----------|----------|-----------|
| Mus_musc Mus_musc | 2.233607 | 1.627174 | 1.584279 | 0.792667 | 1.114596 | 0.781964  |
| Mus_musc Mus_musc | 0.213814 | 0.190674 | 0.656045 | 0.054202 | 0.187596 | 0.071818  |
| Mus_musc Mus_musc | 0.194858 | 0.337401 | 0.213404 | 0.206617 | 0.23436  | 0.320618  |
| Mus_musc Mus_musc | 0.076334 | 0.22934  | 0.089505 | 0.195024 | 0        | 0         |
| Mus_musc Mus_musc | 0.146219 | 0.059792 | 0        | 0.138151 | 0.167799 | 0.132437  |
| Mus_musc Mus_musc | 0        | 0        | 0.124026 | 0        | 0.264352 | 0.221226  |
| ENSMUSG Vmn1r201  | 0        | 0        | 0        | 0        | 0        | 0         |
| ENSMUSG Pla2g1b   | 19.36879 | 21.30704 | 17.90445 | 18.83747 | 12.6213  | 18.370806 |
| ENSMUSG Ugt2a1    | 0        | 0        | 0        | 0.083149 | 0.021793 | 0         |
| Mus_musc Mus_musc | 0        | 0        | 0.081672 | 0        | 0        | 0         |
| Mus_musc Mus_musc | 1.167468 | 1.306425 | 1.911017 | 1.401259 | 1.510985 | 1.467424  |
| Mus_musc Mus_musc | 0        | 0        | 0.082969 | 0.141581 | 0.395478 | 0.088279  |
| Mus_musc Mus_musc | 0.421586 | 0        | 0.200056 | 0.245912 | 0.114472 | 0         |
| Mus_musc Mus_musc | 4.966755 | 3.603178 | 4.009892 | 4.143665 | 4.092828 | 3.819496  |
| Mus_musc Mus_musc | 0        | 0        | 0        | 0.059675 | 0        | 0         |
| Mus_musc Mus_musc | 0.545019 | 0.578473 | 0.482053 | 0.286944 | 0.402847 | 0.200203  |
| ENSMUSG Gm10668   | 0        | 0        | 0        | 0        | 0        | 0         |
| ENSMUSG Gm5725    | 0        | 0        | 0        | 0        | 0        | 0         |
| ENSMUSG Olfr936   | 0        | 0        | 0        | 0        | 0        | 0         |
| ENSMUSG Gm3005    | 0        | 0.004467 | 0        | 0        | 0.014324 | 0         |
| Mus_musc Mus_musc | 0.096164 | 0.649814 | 0.454943 | 0.330465 | 0.115591 | 0.358154  |
| ENSMUSG Olfr1461  | 0        | 0        | 0        | 0        | 0        | 0         |
| ENSMUSG Zfp967    | 1.109027 | 1.771549 | 1.02095  | 0.309872 | 1.254022 | 1.134207  |
| Mus_musc Mus_musc | 0        | 0        | 0        | 0        | 0        | 0         |
| ENSMUSG Gm9803    | 0.484774 | 0.379195 | 0.576273 | 0.478158 | 0.764178 | 0.196291  |
| ENSMUSG Ano6      | 40.4345  | 37.2426  | 38.07163 | 33.2536  | 33.10841 | 35.75422  |
| ENSMUSG Defa24    | 0        | 0        | 0        | 0        | 0        | 0         |
| ENSMUSG Ifi27     | 75.78118 | 62.80055 | 76.99933 | 61.9544  | 48.14306 | 63.024565 |
| ENSMUSG Gm10762   | 1.481406 | 1.52559  | 1.46785  | 1.788219 | 1.584187 | 1.554874  |
| Mus_musc Mus_musc | 0        | 0        | 0.052558 | 0.102987 | 0.248923 | 0.380654  |
| ENSMUSG Gm9936    | 0        | 0        | 0        | 0        | 0        | 0         |
| Mus_musc Mus_musc | 0        | 0.154309 | 0        | 0        | 0        | 0         |
| Mus_musc Mus_musc | 0        | 0.052899 | 0        | 0.213096 | 0.089391 | 0         |
| Mus_musc Mus_musc | 0        | 0        | 0        | 0        | 0        | 0         |
| Mus_musc Mus_musc | 0.070543 | 0.024079 | 0.033653 | 0.262642 | 0.066198 | 0.259891  |
| ENSMUSG F930015N  | 0        | 0.006754 | 0.001532 | 0.068896 | 0.062163 | 0.045269  |
| ENSMUSG Fthl17d   | 0        | 0        | 0        | 0        | 0        | 0         |
| ENSMUSG Gm10377   | 0        | 0        | 0        | 0        | 0        | 0         |
| ENSMUSG Nrarp     | 23.30658 | 16.5277  | 23.30383 | 13.78327 | 15.93067 | 17.327703 |
| ENSMUSG Tmem203   | 10.57429 | 8.228082 | 9.861005 | 9.065549 | 9.445107 | 8.432451  |
| Mus_musc Mus_musc | 0.637649 | 0.71037  | 0        | 0.830294 | 0        | 0         |
| ENSMUSG Grid2ip   | 0        | 0        | 0.01084  | 0        | 0        | 0         |
| Mus_musc Mus_musc | 0.049115 | 0        | 0        | 0.264655 | 0.25883  | 0         |
| ENSMUSG Fthl17b   | 0        | 0        | 0        | 0        | 0        | 0         |
| ENSMUSG Wnt2      | 5.022232 | 5.566903 | 5.822566 | 5.327827 | 3.875501 | 3.593878  |
| ENSMUSG Asz1      | 0.121527 | 0        | 0.042234 | 0        | 0.096787 | 0         |
| ENSMUSG Gm10097   | 0        | 0        | 0        | 0.045004 | 0        | 0         |
| ENSMUSG Cd36      | 396.9198 | 397.177  | 385.7209 | 351.4958 | 414.1009 | 355.52333 |
| ENSMUSG Olfr944   | 0        | 0        | 0        | 0        | 0        | 0         |
| ENSMUSG Olfr1282  | 0        | 0        | 0        | 0        | 0        | 0         |
| ENSMUSG Timm44    | 13.2653  | 12.1719  | 13.01356 | 11.88681 | 11.82649 | 13.744769 |
| ENSMUSG Map2k7    | 19.8742  | 20.2881  | 19.97258 | 17.50037 | 17.97611 | 16.776391 |
| ENSMUSG Ckap2     | 0.270336 | 0.365689 | 0.471106 | 1.213415 | 1.608017 | 1.918932  |
| ENSMUSG Ceacam10  | 0.25951  | 0.088345 | 0.159587 | 0.172854 | 0.170649 | 0.052725  |
| ENSMUSG Avp       | 0        | 0        | 0        | 0        | 0        | 0         |
| ENSMUSG Tmem33    | 14.06841 | 19.33584 | 16.88646 | 14.62866 | 15.08181 | 16.117096 |
| ENSMUSG Gnpnat1   | 1.717127 | 1.819379 | 2.454696 | 2.18801  | 2.924625 | 2.577442  |
| ENSMUSG Nkx2-4    | 0        | 0        | 0        | 0        | 0        | 0         |
| ENSMUSG Fam83e    | 0.723546 | 0.80174  | 0.354022 | 2.500136 | 1.652946 | 2.693946  |
| ENSMUSG Spock3    | 0.117365 | 0.059005 | 0.11331  | 0        | 0.032369 | 0         |
| ENSMUSG Ap4m1     | 5.751782 | 5.969776 | 5.36219  | 5.749674 | 5.938161 | 6.090463  |
| ENSMUSG Gm21797   | 0        | 0        | 0        | 0        | 0        | 0         |
| ENSMUSG Gm20906   | 0        | 0        | 0        | 0        | 0        | 0         |
| ENSMUSG Gm20594   | 0        | 0        | 0.016555 | 0        | 0        | 0         |

|                   |          |          |          |          |          |           |
|-------------------|----------|----------|----------|----------|----------|-----------|
| ENSMUSG Shisa8    | 0.136446 | 0.144238 | 0.105161 | 0.540741 | 0.488372 | 0.419508  |
| ENSMUSG Smok3b    | 0        | 0        | 0        | 0        | 0        | 0         |
| ENSMUSG Fam155a   | 0        | 0        | 0        | 0        | 0        | 0         |
| ENSMUSG Rab11fip3 | 10.42553 | 11.03559 | 10.91596 | 9.071228 | 8.289518 | 9.352444  |
| ENSMUSG Lrg1      | 26.75121 | 22.36619 | 30.54163 | 34.97923 | 38.70392 | 43.579536 |
| ENSMUSG Nolc1     | 12.53809 | 12.69879 | 12.29519 | 11.51257 | 11.76184 | 11.630147 |
| ENSMUSG Pls1      | 7.280728 | 7.247478 | 6.031683 | 4.769378 | 4.997531 | 5.939731  |
| ENSMUSG Olfr690   | 0        | 0        | 0        | 0        | 0        | 0         |
| ENSMUSG Gpa33     | 0        | 0.049155 | 0        | 0.262373 | 0.142005 | 0         |
| ENSMUSG Gm20683   | 1.073108 | 0.713929 | 1.577171 | 0.491665 | 0        | 0.584486  |
| ENSMUSG Tnfaip8   | 7.338389 | 10.41202 | 9.333009 | 19.84171 | 18.89589 | 20.978521 |
| ENSMUSG Cacna1h   | 0.030592 | 0.090911 | 0.06078  | 1.190843 | 1.385218 | 1.195727  |
| ENSMUSG Ccnb1     | 0.399633 | 0.634224 | 0.519365 | 2.52617  | 3.589083 | 3.533134  |
| ENSMUSG Gm2888    | 0        | 0        | 0        | 0        | 0        | 0         |
| ENSMUSG BC035947  | 0        | 0        | 0        | 0        | 0        | 0         |
| ENSMUSG Gm17416   | 0        | 0        | 0        | 0        | 0        | 0         |
| ENSMUSG Utp4      | 8.405357 | 8.606331 | 7.634203 | 6.852093 | 8.039356 | 7.63566   |
| ENSMUSG Mfsd6     | 15.27677 | 15.65377 | 14.5667  | 12.93183 | 12.56547 | 12.318158 |
| ENSMUSG H2a1d     | 0        | 0        | 0        | 0        | 0        | 0         |
| ENSMUSG Vmn1r155  | 0        | 0        | 0        | 0        | 0        | 0         |
| ENSMUSG AL732309  | 3.800152 | 2.408828 | 3.877074 | 4.678118 | 0.363375 | 2.162974  |
| ENSMUSG Ankrd28   | 4.057773 | 4.527278 | 4.076888 | 4.696732 | 5.181406 | 4.780876  |
| ENSMUSG Cpb1      | 0.068696 | 0.158056 | 0.136367 | 0.158779 | 0.097674 | 0.059701  |
| ENSMUSG Ankrd52   | 9.323533 | 8.897562 | 8.799511 | 9.185955 | 9.881207 | 9.995332  |
| ENSMUSG Crybg3    | 12.32671 | 12.52903 | 12.10332 | 8.508755 | 9.384227 | 8.392074  |
| ENSMUSG Arl6      | 5.861162 | 5.965984 | 5.010224 | 5.200478 | 4.850615 | 4.967932  |
| ENSMUSG Trmt2a    | 14.03791 | 13.94427 | 15.09509 | 13.90748 | 12.5024  | 13.13668  |
| ENSMUSG Riox2     | 3.735708 | 3.591876 | 3.276752 | 4.88002  | 4.365324 | 4.427784  |
| ENSMUSG Ttk       | 0.145128 | 0.071564 | 0.314071 | 0.802774 | 1.001385 | 1.104829  |
| ENSMUSG Trp53inp2 | 60.66219 | 64.08431 | 50.502   | 58.54243 | 61.17825 | 56.961697 |
| ENSMUSG Rbm8a     | 16.31382 | 18.61959 | 19.53325 | 16.43397 | 13.31961 | 13.710001 |
| ENSMUSG Gmds      | 4.154364 | 4.283726 | 4.098945 | 5.103864 | 5.034371 | 5.417151  |
| ENSMUSG Sbf2      | 15.36808 | 15.33766 | 14.4036  | 11.28654 | 12.21982 | 10.97691  |
| ENSMUSG Pcp4l1    | 18.55621 | 24.09157 | 14.19819 | 17.16575 | 16.43076 | 17.375875 |
| ENSMUSG Pgam2     | 2.608712 | 8.997333 | 2.954371 | 4.412345 | 3.634055 | 4.239354  |
| ENSMUSG Polm      | 3.493179 | 2.653233 | 3.593129 | 3.728523 | 3.242758 | 3.273176  |
| ENSMUSG Mrps24    | 22.64941 | 19.22197 | 21.56398 | 22.16248 | 23.41976 | 26.856779 |
| ENSMUSG Dbnl      | 48.50825 | 47.98007 | 55.67713 | 59.8044  | 51.73094 | 56.347648 |
| ENSMUSG Pold2     | 9.203659 | 9.04106  | 10.1706  | 9.560264 | 10.34339 | 10.728531 |
| ENSMUSG Aebp1     | 17.32421 | 18.74858 | 12.88348 | 12.12248 | 11.89418 | 13.351098 |
| ENSMUSG Zkscan17  | 10.87166 | 9.707491 | 9.115278 | 8.188192 | 9.121891 | 8.868399  |
| Mus_musc Mus_musc | 0        | 0        | 0.199178 | 0        | 0.295596 | 0.13416   |
| Mus_musc Mus_musc | 0.059906 | 0.140263 | 0.107205 | 0.136226 | 0        | 0.129816  |
| Mus_musc Mus_musc | 0        | 0        | 0        | 0        | 0        | 0         |
| Mus_musc Mus_musc | 0.124529 | 0.121311 | 0.021482 | 1.526201 | 0.624713 | 1.521834  |
| ENSMUSG Gm45140   | 0.240896 | 0.117288 | 0.445252 | 0.232789 | 0.960994 | 0.078804  |
| ENSMUSG Ccdc177   | 0.00981  | 0.027736 | 0.017201 | 0.017808 | 0.019397 | 0.03065   |
| ENSMUSG Kdr       | 112.9431 | 101.8578 | 100.5586 | 61.33325 | 58.1779  | 60.353626 |
| ENSMUSG Ufc1      | 31.08107 | 29.75313 | 31.92403 | 37.71574 | 37.24737 | 41.541383 |
| ENSMUSG Cpt2      | 8.505257 | 10.06237 | 7.873586 | 8.339973 | 8.60188  | 8.388473  |
| ENSMUSG Tnfrsf8   | 0.138573 | 0.086149 | 0.239752 | 0.711105 | 0.574322 | 0.692778  |
| ENSMUSG Scp2      | 68.50777 | 74.79075 | 66.78171 | 74.09483 | 69.57015 | 74.551105 |
| ENSMUSG Podn      | 13.10731 | 18.28486 | 10.69662 | 12.77104 | 10.48123 | 14.681827 |
| ENSMUSG Echdc2    | 14.52354 | 13.45936 | 15.55723 | 11.03063 | 9.470264 | 11.973072 |
| ENSMUSG 0610037L1 | 11.0449  | 9.830004 | 13.13894 | 11.21696 | 8.559833 | 10.303466 |
| ENSMUSG Magoh     | 29.16512 | 25.20883 | 31.98154 | 32.62929 | 25.40448 | 28.534628 |
| ENSMUSG Babam2    | 15.17895 | 14.84033 | 13.54801 | 14.35292 | 13.61381 | 13.966059 |
| ENSMUSG Akr1b7    | 1.102893 | 0.428437 | 0.830306 | 0.358221 | 0.235807 | 0.312009  |
| ENSMUSG Otx1      | 0.146029 | 0.328758 | 0        | 0.278338 | 0.186558 | 0.286945  |
| ENSMUSG Sema5b    | 0.021938 | 0.034452 | 0        | 0.050527 | 0.023829 | 0.035603  |
| ENSMUSG Foxo6     | 1.096478 | 1.483198 | 0.936029 | 0.96025  | 0.809452 | 0.69871   |
| ENSMUSG Rbm12b2   | 5.223679 | 6.708498 | 5.777459 | 4.849595 | 5.052037 | 4.816916  |
| ENSMUSG Nudt6     | 2.221228 | 1.645733 | 2.266467 | 1.425417 | 2.292297 | 3.066463  |
| ENSMUSG Tbc1d5    | 6.361455 | 5.958586 | 5.862985 | 6.725804 | 6.048233 | 6.597634  |

|                   |          |          |          |          |          |           |
|-------------------|----------|----------|----------|----------|----------|-----------|
| ENSMUSG Mut       | 16.16692 | 17.85012 | 15.41928 | 14.02026 | 15.09781 | 14.287743 |
| ENSMUSG Rhag      | 0        | 0        | 0        | 0.022245 | 0        | 0         |
| ENSMUSG Satb1     | 3.69321  | 3.130775 | 5.177171 | 3.071511 | 2.808684 | 2.911538  |
| ENSMUSG Ahctf1    | 13.04695 | 14.34678 | 12.61504 | 11.00989 | 10.61512 | 11.019291 |
| ENSMUSG Edc3      | 10.63643 | 10.00508 | 10.95948 | 7.177477 | 7.809511 | 7.958781  |
| ENSMUSG Supt3     | 3.396411 | 4.007078 | 3.500463 | 3.147292 | 2.87353  | 3.036508  |
| ENSMUSG Hps1      | 4.432549 | 3.377488 | 3.32624  | 4.775497 | 5.121553 | 4.820645  |
| ENSMUSG Cnm1      | 0.031693 | 0        | 0        | 0        | 0        | 0         |
| ENSMUSG Sp2       | 10.97996 | 10.63279 | 11.44932 | 9.380125 | 8.48167  | 9.063284  |
| ENSMUSG Slc25a39  | 44.31592 | 40.26543 | 42.12724 | 43.37102 | 48.18823 | 46.094708 |
| ENSMUSG R3hcc1l   | 6.753812 | 6.537939 | 6.795162 | 5.644522 | 6.072609 | 5.958738  |
| ENSMUSG Loxl4     | 0.48081  | 0.427591 | 0.393101 | 0.408459 | 0.653273 | 0.944711  |
| Mus_musc Mus_musc | 0.181067 | 0.214318 | 0        | 0.082174 | 0.292139 | 0.249419  |
| ENSMUSG Cxcl17    | 12.41144 | 19.05451 | 7.925169 | 42.2749  | 38.1632  | 37.145702 |
| ENSMUSG Lrrc10    | 0.039503 | 0.449853 | 0.030049 | 0.093101 | 0.072167 | 0         |
| ENSMUSG Slc35e3   | 6.745284 | 7.733199 | 6.492058 | 6.395605 | 6.59126  | 6.232903  |
| ENSMUSG Ttc16     | 0.965935 | 1.796873 | 0.976074 | 1.678244 | 1.436921 | 1.723188  |
| ENSMUSG Cxcl11    | 0.022302 | 0.010168 | 0.060738 | 0.287829 | 0.062481 | 0.065538  |
| ENSMUSG Serpinb9b | 0.441091 | 0.364095 | 1.549118 | 0.616358 | 0.591814 | 0.581982  |
| ENSMUSG Olfr659   | 0        | 0        | 0        | 0        | 0        | 0         |
| ENSMUSG Wrnip1    | 22.31568 | 18.98986 | 18.66882 | 16.21238 | 16.75704 | 17.365726 |
| ENSMUSG Olfr652   | 0        | 0        | 0        | 0        | 0        | 0         |
| ENSMUSG Olfr653   | 0        | 0        | 0        | 0        | 0        | 0         |
| ENSMUSG Olfr654   | 0        | 0        | 0        | 0        | 0        | 0         |
| ENSMUSG Serpinb9c | 0        | 0        | 0        | 0        | 0        | 0         |
| ENSMUSG 9130008F2 | 1.077309 | 0.864253 | 0.819399 | 1.168037 | 1.068159 | 1.090606  |
| ENSMUSG Ripk1     | 13.11014 | 10.86052 | 10.69004 | 10.55484 | 12.85166 | 12.976023 |
| ENSMUSG Enpp3     | 0.142936 | 0.293888 | 0.121032 | 0.302697 | 0.31149  | 0.407006  |
| ENSMUSG Nedd1     | 5.820195 | 5.810111 | 5.912526 | 6.046988 | 5.657084 | 5.570123  |
| ENSMUSG Rnase12   | 0        | 0        | 0        | 0        | 0.07639  | 0         |
| ENSMUSG Med23     | 6.872144 | 6.454513 | 6.291955 | 5.212006 | 6.350494 | 6.092393  |
| ENSMUSG Arg1      | 0.929209 | 0.893991 | 0.578752 | 58.86229 | 106.1735 | 96.521088 |
| ENSMUSG Ahi1      | 1.993863 | 2.300302 | 1.624853 | 1.613174 | 1.975233 | 1.805737  |
| ENSMUSG Myb       | 3.197219 | 2.676773 | 2.219224 | 4.992409 | 4.794093 | 4.067333  |
| ENSMUSG Gm37388   | 0        | 0        | 0        | 0        | 0        | 0         |
| ENSMUSG Gm37389   | 0        | 0        | 0        | 0        | 0        | 0         |
| ENSMUSG Atox1     | 43.40554 | 44.67339 | 50.88398 | 62.37868 | 60.1422  | 67.496941 |
| ENSMUSG G3bp1     | 16.73224 | 16.78915 | 15.67163 | 16.05231 | 15.7003  | 17.03896  |
| ENSMUSG Dnah11    | 0.983472 | 1.088729 | 0.641073 | 0.875759 | 0.999506 | 1.122612  |
| ENSMUSG Glra2     | 0        | 0        | 0        | 0        | 0        | 0         |
| ENSMUSG Rdh8      | 0        | 0        | 0        | 0        | 0        | 0         |
| ENSMUSG Ubxn7     | 6.548797 | 7.060111 | 6.252602 | 5.50423  | 5.515473 | 5.180512  |
| ENSMUSG Cldn5     | 301.9247 | 302.1946 | 403.0978 | 224.7331 | 235.755  | 232.58978 |
| ENSMUSG Ifit57    | 7.30604  | 8.559225 | 7.470214 | 8.785489 | 7.930979 | 7.573589  |
| ENSMUSG Fkbp1a    | 182.0604 | 176.231  | 201.3723 | 134.4209 | 135.9623 | 134.04527 |
| ENSMUSG Inha      | 0.540256 | 0.494836 | 0.855332 | 0.275594 | 0.447049 | 0.585525  |
| ENSMUSG Olfr508   | 0        | 0        | 0        | 0        | 0        | 0         |
| ENSMUSG Chadl     | 0.939306 | 0.483676 | 0.6119   | 0.507095 | 0.485591 | 0.397915  |
| ENSMUSG S100a7a   | 0.280284 | 0.462928 | 0.232947 | 0.247429 | 0.511508 | 0.165192  |
| ENSMUSG Rnf217    | 2.515691 | 2.550201 | 2.143263 | 1.647584 | 1.707931 | 1.685782  |
| ENSMUSG Fshb      | 0        | 0        | 0        | 0        | 0        | 0         |
| ENSMUSG Ffar4     | 8.127692 | 7.292359 | 5.609214 | 7.854588 | 5.609951 | 8.870954  |
| ENSMUSG Ifi205    | 2.43831  | 3.053673 | 4.442617 | 4.004509 | 3.138448 | 3.064598  |
| ENSMUSG Alkal2    | 0        | 0.067812 | 0        | 0        | 0.027255 | 0         |
| ENSMUSG Gzmm      | 1.135055 | 1.10894  | 0.652905 | 0.746228 | 0.650036 | 0.64916   |
| ENSMUSG Amigo2    | 9.765626 | 10.19525 | 7.879032 | 7.067851 | 5.98801  | 6.721     |
| ENSMUSG Rbm47     | 5.476777 | 5.809187 | 5.051626 | 7.549017 | 7.916259 | 8.871253  |
| ENSMUSG Nags      | 0.137268 | 0        | 0.024824 | 0.837646 | 0.592941 | 0.543023  |
| ENSMUSG Fancl     | 2.609358 | 2.636924 | 2.807239 | 2.827736 | 2.830288 | 2.798196  |
| ENSMUSG Pank1     | 3.863819 | 4.058934 | 2.979055 | 3.518869 | 4.22874  | 3.864809  |
| ENSMUSG Cplx1     | 0.043293 | 0.230371 | 0.078101 | 0.04579  | 0.030277 | 0.075391  |
| ENSMUSG Map3k13   | 1.284314 | 1.386889 | 1.032611 | 1.3682   | 1.319178 | 1.374828  |
| ENSMUSG Itih1     | 0.327115 | 0.387556 | 0.289338 | 0.906445 | 0.60989  | 0.480758  |
| ENSMUSG Sfmbt1    | 3.840597 | 3.549392 | 3.20281  | 3.81877  | 3.984373 | 3.829814  |

|                   |          |          |          |          |          |           |
|-------------------|----------|----------|----------|----------|----------|-----------|
| ENSMUSG Tmem110   | 11.27611 | 12.32263 | 11.78147 | 10.23653 | 10.89149 | 11.997399 |
| ENSMUSG Itih3     | 0.123805 | 0.150138 | 0.453511 | 0.275332 | 0.338442 | 0.258735  |
| ENSMUSG Spp2      | 0.135518 | 0.061506 | 0        | 0        | 0        | 0         |
| ENSMUSG Gm14525   | 0        | 0        | 0        | 0        | 0        | 0         |
| ENSMUSG 4930590J0 | 0        | 0        | 0        | 0.078884 | 0        | 0.023274  |
| ENSMUSG Gm5615    | 0        | 0        | 0        | 0        | 0        | 0         |
| ENSMUSG Farp2     | 4.907558 | 4.684187 | 3.161851 | 4.253096 | 4.373488 | 3.412952  |
| ENSMUSG Poglut1   | 12.35141 | 11.77358 | 11.75292 | 10.72414 | 11.42871 | 11.539556 |
| ENSMUSG Gm15292   | 0        | 0        | 0        | 0        | 0        | 0         |
| ENSMUSG Gm10521   | 0.257064 | 0.239797 | 0.292193 | 0.591344 | 0.622308 | 0.842434  |
| ENSMUSG Defa22    | 0        | 0        | 0        | 0        | 0        | 0         |
| ENSMUSG Ifi207    | 1.232205 | 1.514616 | 2.20829  | 2.655958 | 2.392084 | 2.793496  |
| ENSMUSG AA792892  | 0        | 0        | 0        | 0        | 0        | 0         |
| ENSMUSG Defa30    | 0        | 0        | 0        | 0        | 0        | 0         |
| ENSMUSG Defa21    | 0        | 0        | 0        | 0        | 0        | 0         |
| ENSMUSG Defa23    | 0        | 0        | 0        | 0        | 0        | 0         |
| ENSMUSG Nr3c2     | 3.907311 | 3.791823 | 2.991541 | 2.382675 | 2.372079 | 2.364236  |
| ENSMUSG Hpgd      | 318.5732 | 323.8311 | 344.2965 | 169.0056 | 194.8035 | 155.64212 |
| ENSMUSG Scrg1     | 0.395403 | 0.412006 | 0.262092 | 0        | 0.090679 | 0.220497  |
| ENSMUSG Tmem184c  | 8.582907 | 7.972228 | 7.997472 | 10.82581 | 10.70676 | 10.300888 |
| ENSMUSG Ednra     | 15.10385 | 15.73635 | 16.10351 | 13.16465 | 12.86385 | 11.867615 |
| ENSMUSG Trmt61a   | 2.326193 | 1.975016 | 2.578451 | 3.953417 | 2.879774 | 3.801978  |
| ENSMUSG Ercc1     | 8.12802  | 9.130758 | 10.21292 | 6.68836  | 7.521369 | 6.483234  |
| ENSMUSG Slirp     | 4.971667 | 6.350931 | 9.727627 | 7.40736  | 7.026907 | 6.278869  |
| ENSMUSG Prmt5     | 10.57507 | 11.19697 | 10.05974 | 10.24036 | 9.165902 | 8.746836  |
| ENSMUSG Klc4      | 15.79131 | 15.2831  | 14.7129  | 16.69599 | 15.40178 | 19.458449 |
| ENSMUSG Fosb      | 15.11767 | 0.931401 | 1.199469 | 0.372222 | 0.137082 | 0.353725  |
| ENSMUSG Lif       | 0.815016 | 0.385718 | 0.669178 | 0.687222 | 0.500694 | 0.78398   |
| ENSMUSG Fbxo15    | 0.10024  | 0.111708 | 0.14078  | 0.125405 | 0.237716 | 0.093766  |
| ENSMUSG Cmip      | 26.99632 | 24.72521 | 22.89169 | 26.08291 | 27.06668 | 28.443287 |
| ENSMUSG Apc       | 14.81095 | 17.07541 | 12.64216 | 14.08755 | 14.48362 | 13.145292 |
| ENSMUSG Reep5     | 48.71531 | 48.919   | 48.04736 | 39.55278 | 41.52118 | 43.009331 |
| ENSMUSG Slc10a4   | 0        | 0        | 0        | 0        | 0        | 0         |
| ENSMUSG Tec       | 3.62512  | 4.113183 | 3.960681 | 8.351172 | 8.644354 | 8.694453  |
| ENSMUSG Gabrb1    | 0.012497 | 0.019669 | 0.025764 | 0.023017 | 0.02256  | 0.060363  |
| ENSMUSG Commd8    | 9.409582 | 10.55002 | 9.950839 | 9.077678 | 9.961803 | 9.421099  |
| ENSMUSG Gabra4    | 0.225885 | 0.266548 | 0.398735 | 0.204516 | 0.199281 | 0.219248  |
| ENSMUSG Prss33    | 0        | 0        | 0        | 0        | 0.030186 | 0         |
| ENSMUSG Tifab     | 7.521375 | 6.234319 | 11.26313 | 18.47422 | 17.38268 | 17.045914 |
| ENSMUSG Ppp5c     | 36.20621 | 36.22749 | 36.15941 | 30.55807 | 33.1047  | 31.322689 |
| Mus_musc Mus_musc | 0        | 0        | 0        | 0        | 0        | 0         |
| Mus_musc Mus_musc | 0        | 0        | 0        | 0        | 0        | 0.446859  |
| ENSMUSG Arid1b    | 7.656113 | 8.18389  | 7.418876 | 7.49328  | 8.158656 | 8.33017   |
| Mus_musc Mus_musc | 0        | 0        | 0.242064 | 0.466078 | 0.194335 | 0         |
| ENSMUSG Krtap3-3  | 0        | 0        | 0        | 0        | 0        | 0         |
| ENSMUSG 4930572O  | 0.111307 | 0        | 0        | 0.37572  | 0.666176 | 0.365221  |
| ENSMUSG Krtap3-2  | 0        | 0        | 0        | 0        | 0        | 0         |
| Mus_musc Mus_musc | 1.438449 | 1.168338 | 0.865975 | 1.071576 | 0.652383 | 1.112821  |
| Mus_musc Mus_musc | 0        | 0        | 0        | 0.131219 | 0.207917 | 0.227348  |
| ENSMUSG Cct4      | 47.82803 | 52.65122 | 51.28879 | 49.64124 | 50.59173 | 51.04292  |
| ENSMUSG Ferd3l    | 0        | 0        | 0        | 0        | 0        | 0         |
| ENSMUSG Golph3l   | 16.11876 | 16.01837 | 15.01612 | 15.89766 | 17.6222  | 15.525983 |
| ENSMUSG B430306N  | 0.482501 | 0.618782 | 0.672109 | 1.881474 | 1.352538 | 1.839074  |
| ENSMUSG Cox17     | 30.29649 | 29.0064  | 32.43832 | 30.92088 | 30.20811 | 23.072483 |
| ENSMUSG Smim6     | 0.972457 | 0.642955 | 0.499381 | 1.767385 | 1.586694 | 1.758809  |
| ENSMUSG Gm13547   | 0        | 0        | 0.129992 | 0        | 0.115713 | 0         |
| ENSMUSG Olfr288   | 0        | 0        | 0        | 0        | 0        | 0         |
| ENSMUSG Nutf2     | 25.77928 | 23.14241 | 29.52218 | 18.90235 | 24.86233 | 21.87911  |
| ENSMUSG Dhx8      | 10.32871 | 10.32454 | 10.43027 | 9.140797 | 10.23011 | 9.730655  |
| ENSMUSG Rtkn      | 9.806408 | 10.02887 | 9.799833 | 8.930767 | 8.356919 | 9.725539  |
| ENSMUSG Mrpl54    | 17.59775 | 18.3209  | 21.277   | 23.81947 | 19.41137 | 23.873161 |
| ENSMUSG Arl4d     | 53.7891  | 58.74834 | 74.40086 | 23.01055 | 34.08918 | 27.46641  |
| Mus_musc Mus_musc | 0        | 0.244064 | 0        | 0.569668 | 0.09132  | 0.43224   |
| Mus_musc Mus_musc | 0.678305 | 0.589296 | 0.507638 | 0.552362 | 0.65868  | 0.655146  |



|                   |          |          |          |          |          |           |   |
|-------------------|----------|----------|----------|----------|----------|-----------|---|
| Mus_musc Mus_musc | 0        | 0.194359 | 0        | 0        | 0        | 0         | 0 |
| Mus_musc Mus_musc | 0.188031 | 0        | 0        | 0        | 0        | 0         | 0 |
| Mus_musc Mus_musc | 0.117651 | 0        | 0.234057 | 0.113013 | 0        | 0         | 0 |
| ENSMUSG Sprr2a2   | 0        | 0.019861 | 0        | 3.800605 | 3.739047 | 4.103964  |   |
| ENSMUSG Lce1a2    | 0        | 0        | 0        | 0        | 0        | 0         | 0 |
| Mus_musc Mus_musc | 0        | 0.070761 | 0.135802 | 0        | 0        | 0         | 0 |
| ENSMUSG Grap      | 63.24407 | 55.92634 | 59.87156 | 43.09324 | 46.74577 | 38.099236 |   |
| Mus_musc Mus_musc | 0.08127  | 0.247461 | 0.168532 | 0.241923 | 0.195178 | 0.210037  |   |
| Mus_musc Mus_musc | 0.335363 | 0.146293 | 0.248285 | 0        | 0.087285 | 0         | 0 |
| Mus_musc Mus_musc | 0        | 0        | 0        | 0        | 0        | 0         | 0 |
| ENSMUSG 1700029I1 | 0.71772  | 0.875367 | 0.705678 | 0.319311 | 0.5702   | 0.607099  |   |
| ENSMUSG Syt16     | 0        | 0        | 0        | 0        | 0        | 0         | 0 |
| ENSMUSG Zfp59     | 2.443944 | 2.080369 | 2.268607 | 2.105343 | 2.334415 | 2.249457  |   |
| ENSMUSG 9530053A  | 0.27355  | 0.315261 | 0.212974 | 0.433195 | 0.368825 | 0.369512  |   |
| ENSMUSG Rad54b    | 0.093023 | 0.353683 | 0.06316  | 0.473202 | 0.348053 | 0.791285  |   |
| ENSMUSG Gm12353   | 0.209078 | 0.256961 | 0.127012 | 0.217024 | 0        | 0.159578  |   |
| ENSMUSG Evi2a     | 3.572151 | 2.680339 | 4.166657 | 16.99836 | 15.90982 | 15.186622 |   |
| Mus_musc Mus_musc | 0        | 0        | 0        | 0        | 0        | 0.272275  |   |
| Mus_musc Mus_musc | 1.603674 | 4.508884 | 3.171199 | 3.16223  | 2.445629 | 4.266455  |   |
| Mus_musc Mus_musc | 0.099419 | 0        | 0.1301   | 0.522048 | 0.133045 | 0         | 0 |
| Mus_musc Mus_musc | 0.079605 | 0        | 0.352053 | 0        | 0.311722 | 0         | 0 |
| Mus_musc Mus_musc | 0        | 0        | 0        | 0        | 0        | 0         | 0 |
| Mus_musc Mus_musc | 1.642086 | 1.778688 | 1.510132 | 1.76945  | 2.064467 | 3.112757  |   |
| ENSMUSG Lamtor5   | 36.65312 | 35.1825  | 42.11638 | 34.9648  | 37.58353 | 38.654396 |   |
| Mus_musc Mus_musc | 0.744747 | 0.700913 | 0.435474 | 0.577674 | 0.732756 | 0.983111  |   |
| ENSMUSG Olfr412   | 0        | 0        | 0        | 0        | 0        | 0         | 0 |
| ENSMUSG Olfr25    | 0        | 0        | 0        | 0        | 0        | 0         | 0 |
| ENSMUSG Hemk1     | 4.399395 | 4.144105 | 4.836452 | 5.251882 | 4.489218 | 4.874759  |   |
| ENSMUSG Cish      | 12.29509 | 9.303928 | 12.79281 | 13.524   | 15.24141 | 16.000942 |   |
| ENSMUSG Aldoa     | 0.908322 | 0.528145 | 0.518138 | 0.501021 | 0.135094 | 0.767317  |   |
| ENSMUSG Col6a4    | 0.225696 | 0.126158 | 0.078016 | 0.11365  | 0.079977 | 0.121616  |   |
| ENSMUSG Pik3r4    | 9.840564 | 8.622402 | 9.195784 | 7.464507 | 9.225373 | 8.362943  |   |
| ENSMUSG Atp2c1    | 25.26193 | 26.49085 | 24.30159 | 22.43378 | 24.41192 | 22.434786 |   |
| ENSMUSG Mapkapk3  | 10.3879  | 12.02686 | 10.44028 | 17.47316 | 18.42889 | 21.333881 |   |
| ENSMUSG Manf      | 28.57672 | 32.7845  | 40.03172 | 56.12835 | 57.9511  | 58.51699  |   |
| ENSMUSG Ii7       | 0.988774 | 0.77943  | 0.635624 | 0.856182 | 0.797645 | 0.667025  |   |
| ENSMUSG Olfr56    | 0.220683 | 0.53809  | 2.754659 | 1.69301  | 0.446086 | 0.283656  |   |
| ENSMUSG Cul9      | 4.28644  | 4.160041 | 3.400387 | 3.333395 | 3.430115 | 3.762137  |   |
| ENSMUSG Dcaf1     | 10.38085 | 10.32381 | 9.748928 | 7.876852 | 8.728646 | 7.985772  |   |
| ENSMUSG Slc25a24  | 13.70955 | 12.72681 | 13.2851  | 11.4364  | 12.48529 | 12.324213 |   |
| ENSMUSG Zfp770    | 3.609066 | 3.666568 | 3.431918 | 2.577665 | 2.586818 | 2.303228  |   |
| ENSMUSG Grem2     | 15.35099 | 15.85749 | 13.31636 | 9.884892 | 10.41494 | 10.042872 |   |
| ENSMUSG Tceal7    | 0        | 0        | 0.052021 | 0.10484  | 0        | 0.110208  |   |
| ENSMUSG Mroh2a    | 0.655524 | 0.671599 | 0.555002 | 0.643462 | 0.584586 | 0.712198  |   |
| ENSMUSG Psm8      | 36.9321  | 31.73053 | 95.50084 | 71.31509 | 49.95035 | 59.577998 |   |
| ENSMUSG Tap2      | 26.29299 | 23.3172  | 58.03711 | 35.00366 | 24.64697 | 28.00792  |   |
| ENSMUSG Gm3259    | 0        | 0        | 0        | 0        | 0        | 0         | 0 |
| ENSMUSG Arpc4     | 42.70564 | 39.66808 | 44.41599 | 44.93692 | 47.83345 | 47.195395 |   |
| ENSMUSG Mthfsl    | 12.34261 | 11.86443 | 12.35657 | 17.72296 | 16.92687 | 15.617711 |   |
| ENSMUSG 4930402FC | 0.063865 | 0        | 0        | 0        | 0        | 0.017452  |   |
| ENSMUSG Col11a2   | 0.308859 | 0.372072 | 0.480915 | 0.419106 | 0.573551 | 0.426184  |   |
| ENSMUSG Dsc2      | 0.156585 | 0.384582 | 0.073036 | 0.994203 | 0.474035 | 0.704406  |   |
| Mus_musc Mus_musc | 0        | 0        | 0        | 0        | 0        | 0.212523  |   |
| ENSMUSG Cilp2     | 0.084688 | 0.100083 | 0.061638 | 0.065589 | 0.067251 | 0.130775  |   |
| ENSMUSG Calcr1    | 310.4722 | 332.5265 | 328.2621 | 201.6528 | 216.2252 | 181.22635 |   |
| ENSMUSG Gls2      | 0.157485 | 0.178375 | 0.192851 | 0.035997 | 0.159701 | 0.183014  |   |
| ENSMUSG Uba1      | 56.47807 | 51.93563 | 55.71074 | 52.06542 | 52.81168 | 55.637032 |   |
| ENSMUSG Nsmce2    | 9.034046 | 11.02825 | 8.493095 | 9.161188 | 9.011224 | 8.413147  |   |
| Mus_musc Mus_musc | 0        | 0.154309 | 0        | 0        | 0        | 0         | 0 |
| Mus_musc Mus_musc | 0        | 0        | 0        | 0        | 0        | 0.184186  |   |
| ENSMUSG Patj      | 11.85934 | 11.54693 | 10.02645 | 7.964479 | 7.669427 | 8.117397  |   |
| ENSMUSG Zfp980    | 0        | 0        | 0        | 0        | 0        | 0         | 0 |
| ENSMUSG Gcn111    | 16.059   | 14.41207 | 15.72536 | 13.84158 | 13.75964 | 13.340704 |   |
| ENSMUSG Mmel1     | 0.05689  | 0.251799 | 0.181558 | 0.074824 | 0        | 0.157578  |   |

|                   |          |          |          |          |          |           |
|-------------------|----------|----------|----------|----------|----------|-----------|
| ENSMUSG Mrps27    | 7.014772 | 5.197276 | 5.349721 | 5.107454 | 5.052456 | 5.975942  |
| ENSMUSG Kctd12b   | 5.537988 | 5.49951  | 4.291334 | 5.299686 | 5.5099   | 4.943923  |
| ENSMUSG Olfr746   | 0        | 0        | 0        | 0        | 0        | 0         |
| Mus_musc Mus_musc | 0        | 0        | 0        | 0        | 0.374928 | 0         |
| Mus_musc Mus_musc | 0.122807 | 0.203664 | 0        | 0.498578 | 0.345032 | 0.094755  |
| ENSMUSG Scml2     | 0.097354 | 0.114162 | 0.092478 | 0.113846 | 0.083967 | 0.135242  |
| Mus_musc Mus_musc | 0.258064 | 0.238457 | 0        | 0.521718 | 0.407727 | 0.347216  |
| Mus_musc Mus_musc | 0        | 0        | 0        | 0        | 0        | 0         |
| Mus_musc Mus_musc | 0.153615 | 0        | 0.41963  | 0        | 0        | 0         |
| ENSMUSG Krtap8-1  | 0        | 0        | 0        | 0        | 0        | 0         |
| ENSMUSG Cyp2b13   | 0        | 0.023455 | 0        | 0        | 0.040425 | 0         |
| ENSMUSG Ofd1      | 2.656984 | 2.544492 | 2.325486 | 2.587296 | 2.779417 | 2.78555   |
| ENSMUSG Clec4a4   | 0.254666 | 0.13164  | 0.126267 | 0.185901 | 0.146274 | 0.102537  |
| ENSMUSG Abcb1a    | 12.66385 | 14.64683 | 11.1886  | 6.53071  | 8.133989 | 7.183465  |
| ENSMUSG Olfr1199  | 0        | 0        | 0        | 0        | 0        | 0         |
| ENSMUSG Rptn      | 0.148756 | 0.388974 | 0.045881 | 0.119536 | 0.072948 | 0.132298  |
| ENSMUSG Elmod1    | 1.730755 | 2.259994 | 1.003954 | 1.769955 | 2.569976 | 2.328171  |
| ENSMUSG Gpr82     | 0.198348 | 0.292675 | 0.121915 | 0.072547 | 0.210692 | 0.180055  |
| ENSMUSG Pdha2     | 0        | 0        | 0        | 0        | 0        | 0         |
| ENSMUSG Rps8      | 346.2486 | 385.2239 | 319.4843 | 404.2915 | 424.5222 | 430.16376 |
| ENSMUSG Tctex1d4  | 7.030035 | 6.954791 | 4.404542 | 11.85731 | 11.91361 | 10.262179 |
| ENSMUSG Nccrp1    | 0.075912 | 0.07694  | 0.121639 | 1.853823 | 1.275508 | 1.850645  |
| ENSMUSG Tyw3      | 1.017393 | 1.22354  | 1.31783  | 0.820712 | 0.957989 | 0.865009  |
| ENSMUSG A730046J1 | 0        | 0.026128 | 0.009009 | 0        | 0        | 0.046017  |
| ENSMUSG R3hdm4    | 30.15608 | 27.90234 | 29.11419 | 29.10826 | 30.52585 | 32.251889 |
| Mus_musc Mus_musc | 0        | 0        | 0        | 0        | 0        | 0         |
| Mus_musc Mus_musc | 0        | 0        | 0        | 0        | 0        | 0.184186  |
| ENSMUSG Fam160a1  | 5.75576  | 5.003524 | 4.773617 | 3.739685 | 3.68207  | 4.352906  |
| ENSMUSG S100a8    | 22.13664 | 20.87017 | 25.2855  | 15.66038 | 9.491731 | 9.267675  |
| ENSMUSG Sag       | 0.111572 | 0.205297 | 0.203038 | 0.097182 | 0.08254  | 0.096433  |
| ENSMUSG Utp20     | 3.384399 | 3.288463 | 2.902123 | 3.278394 | 3.224789 | 3.971048  |
| ENSMUSG Mia3      | 47.83075 | 47.01728 | 47.11241 | 54.403   | 53.29793 | 47.523017 |
| ENSMUSG Gatd1     | 8.770845 | 8.059107 | 8.317583 | 10.72666 | 9.344421 | 9.620625  |
| Mus_musc Mus_musc | 0.131498 | 0.173733 | 0        | 0        | 0.102703 | 0         |
| ENSMUSG Spic      | 0.230693 | 0.355095 | 0.274629 | 0.395213 | 0.315672 | 0.273511  |
| ENSMUSG Dnajb1    | 28.17223 | 44.52529 | 45.18499 | 22.3423  | 26.90232 | 36.049608 |
| ENSMUSG Sprr2a3   | 0        | 0.110053 | 0        | 19.00369 | 5.325907 | 21.359219 |
| ENSMUSG Aadacl3   | 0        | 0        | 0        | 0        | 0        | 0         |
| ENSMUSG Zfp600    | 0.024703 | 0.017853 | 0        | 0.006222 | 0        | 0         |
| ENSMUSG Zfp979    | 1.269393 | 1.344882 | 1.360609 | 1.601922 | 1.440211 | 1.638434  |
| ENSMUSG Zfp987    | 0.017541 | 0        | 0        | 0        | 0        | 0         |
| Mus_musc Mus_musc | 0        | 0        | 0        | 0.196065 | 0        | 0         |
| Mus_musc Mus_musc | 6.715284 | 6.681111 | 8.162787 | 7.712316 | 7.595615 | 7.000001  |
| Mus_musc Mus_musc | 0.141437 | 0.240193 | 0.219655 | 1.415759 | 1.446582 | 1.346032  |
| Mus_musc Mus_musc | 0.02854  | 0.070476 | 0.117156 | 0.575523 | 0.442603 | 0.211021  |
| Mus_musc Mus_musc | 0.828419 | 1.351403 | 0.969299 | 1.299526 | 0.993394 | 1.640756  |
| Mus_musc Mus_musc | 3.532564 | 3.93342  | 3.768728 | 4.042312 | 3.76444  | 4.120087  |
| Mus_musc Mus_musc | 0        | 0        | 0.110826 | 0        | 0.310055 | 0.29879   |
| Mus_musc Mus_musc | 0        | 0        | 0        | 0.183331 | 0.165343 | 0         |
| ENSMUSG Gm21798   | 0        | 0        | 0        | 0        | 0        | 0         |
| ENSMUSG Gm20909   | 0        | 0        | 0        | 0        | 0        | 0         |
| ENSMUSG Olfr819   | 0        | 0        | 0        | 0        | 0        | 0         |
| ENSMUSG Gm3893    | 0        | 0        | 0        | 0        | 0        | 0         |
| ENSMUSG Tapt1     | 19.32559 | 21.51186 | 19.08247 | 16.34079 | 17.87968 | 17.715408 |
| ENSMUSG Gm6164    | 0        | 0        | 0        | 0        | 0        | 0         |
| ENSMUSG Tshz1     | 9.582821 | 9.895518 | 8.352603 | 7.482572 | 8.028992 | 7.945442  |
| Mus_musc Mus_musc | 0        | 0        | 0.168936 | 0        | 0        | 0         |
| Mus_musc Mus_musc | 0.264619 | 0        | 0        | 0        | 0        | 0         |
| Mus_musc Mus_musc | 6.315934 | 20.5646  | 17.95048 | 16.29101 | 16.23183 | 16.692516 |
| Mus_musc Mus_musc | 0.141921 | 0.317794 | 0        | 0.475929 | 0        | 0.262362  |
| Mus_musc Mus_musc | 0.082831 | 0.406766 | 0.525513 | 0.219519 | 0.124462 | 0.373145  |
| Mus_musc Mus_musc | 0        | 0.121506 | 0        | 0.028311 | 0        | 0.107076  |
| ENSMUSG Epn2      | 40.58349 | 39.18431 | 38.19228 | 23.72056 | 25.54606 | 23.869196 |
| ENSMUSG Olfr888   | 0        | 0        | 0        | 0        | 0        | 0         |

|                   |          |          |          |          |          |           |
|-------------------|----------|----------|----------|----------|----------|-----------|
| ENSMUSG Ebf1      | 2.433323 | 1.968456 | 2.383698 | 2.042253 | 2.064206 | 1.92118   |
| ENSMUSG Olfr834   | 0        | 0        | 0        | 0        | 0        | 0         |
| ENSMUSG Gm8298    | 0        | 0        | 0        | 0        | 0        | 0         |
| ENSMUSG Gm20877   | 0        | 0        | 0        | 0        | 0        | 0         |
| ENSMUSG Zfp607b   | 0.319678 | 0.513797 | 0.412947 | 0.243781 | 0.359156 | 0.391992  |
| ENSMUSG Fxyd3     | 1.066381 | 1.486579 | 0.743393 | 2.762545 | 0.989168 | 1.534349  |
| ENSMUSG Gm10375   | 0        | 0        | 0        | 0        | 0        | 0         |
| Mus_musc Mus_musc | 1457.368 | 2244.198 | 2274.619 | 2496.669 | 2404.56  | 1935.6777 |
| Mus_musc Mus_musc | 0        | 0        | 0        | 0        | 0        | 0         |
| Mus_musc Mus_musc | 0        | 0        | 0        | 0        | 0        | 0         |
| Mus_musc Mus_musc | 7.121025 | 10.34966 | 5.072638 | 3.425495 | 4.680537 | 5.278585  |
| Mus_musc Mus_musc | 0        | 0        | 0.739948 | 0        | 0        | 0         |
| ENSMUSG Ppme1     | 16.79282 | 16.43642 | 16.27035 | 13.72319 | 12.87092 | 13.390043 |
| Mus_musc Mus_musc | 0        | 0        | 0        | 0.329669 | 0        | 0         |
| Mus_musc Mus_musc | 3.324868 | 1.510607 | 1.732241 | 1.58919  | 1.8067   | 1.792767  |
| Mus_musc Mus_musc | 1.185122 | 1.397113 | 0.949837 | 1.494855 | 1.033344 | 0.965141  |
| Mus_musc Mus_musc | 0.821836 | 0.836359 | 0.611833 | 0.87483  | 0.681944 | 0.6686    |
| Mus_musc Mus_musc | 0.157911 | 0.711363 | 0.182859 | 1.045006 | 0.767031 | 0.510868  |
| Mus_musc Mus_musc | 3.142327 | 3.091815 | 3.55593  | 2.289991 | 1.680507 | 1.893288  |
| ENSMUSG Smbd1     | 0        | 0.133856 | 0        | 0.217328 | 0        | 0.278585  |
| ENSMUSG Cdh20     | 0        | 0        | 0        | 0        | 0        | 0         |
| ENSMUSG Zfp623    | 6.514465 | 7.201482 | 6.796521 | 5.628855 | 5.47333  | 5.194593  |
| ENSMUSG 1700020N  | 0        | 0        | 0.095444 | 0.35344  | 0.065395 | 0.131289  |
| Mus_musc Mus_musc | 0        | 0        | 0        | 0.534498 | 0.292145 | 0.234005  |
| Mus_musc Mus_musc | 0.859215 | 0.442155 | 0.102961 | 0.230391 | 0.207405 | 0.177919  |
| Mus_musc Mus_musc | 0.440524 | 0.673799 | 1.584273 | 0.423997 | 0.344152 | 0.60042   |
| Mus_musc Mus_musc | 0        | 0        | 0.180639 | 0.529467 | 0.537196 | 0.707956  |
| Mus_musc Mus_musc | 0        | 0        | 0        | 0        | 0        | 0         |
| ENSMUSG Ppp2r3d   | 41.00892 | 31.09213 | 38.27837 | 31.97258 | 32.26502 | 34.745883 |
| ENSMUSG Asmt      | 0        | 0        | 0        | 0        | 0        | 0         |
| ENSMUSG Olfr1303  | 0        | 0        | 0        | 0        | 0        | 0         |
| Mus_musc Mus_musc | 0.29614  | 0.029468 | 0.474548 | 0.095762 | 0.108872 | 0.512469  |
| ENSMUSG 4933402N  | 0        | 0        | 0        | 0        | 0        | 0         |
| ENSMUSG Gm28778   | 0.230417 | 0        | 0        | 0        | 0        | 0         |
| ENSMUSG Nup50     | 9.923451 | 10.17797 | 9.542412 | 10.75963 | 11.70008 | 11.827355 |
| ENSMUSG Romo1     | 16.95529 | 22.16627 | 24.05128 | 27.04492 | 19.39922 | 20.671991 |
| Mus_musc Mus_musc | 0.092273 | 0        | 0.451461 | 0.202708 | 0        | 0         |
| ENSMUSG Fto       | 19.09674 | 19.03858 | 16.98636 | 14.73846 | 15.23044 | 14.591296 |
| ENSMUSG Gm9268    | 0        | 0        | 0        | 0        | 0        | 0         |
| ENSMUSG Krt28     | 0        | 0.028958 | 0.079118 | 0        | 0        | 0         |
| ENSMUSG Tbc1d9b   | 29.70051 | 29.14115 | 27.50712 | 26.41536 | 29.34099 | 27.718008 |
| ENSMUSG Olfr6     | 0        | 0        | 0        | 0        | 0        | 0         |
| ENSMUSG Man1b1    | 24.55528 | 24.40919 | 25.19358 | 28.88748 | 31.26786 | 30.178997 |
| ENSMUSG Ccdc148   | 0.13499  | 0.176492 | 0.076483 | 0.110024 | 0.257532 | 0.263899  |
| ENSMUSG Alg11     | 4.618271 | 4.735179 | 4.158469 | 4.087485 | 4.178969 | 4.026846  |
| ENSMUSG Ankrd45   | 0.874999 | 0.718739 | 0.502851 | 0.775061 | 0.931099 | 0.991551  |
| ENSMUSG Gm44790   | 0        | 0        | 0        | 0        | 0        | 0         |
| ENSMUSG Reep2     | 0.693451 | 0.567844 | 0.235774 | 0.371524 | 0.570546 | 0.47175   |
| ENSMUSG Fndc4     | 2.075263 | 2.240898 | 2.654083 | 2.083197 | 1.270369 | 1.848481  |
| ENSMUSG Ciart     | 4.481068 | 4.054286 | 4.510694 | 2.46366  | 2.33264  | 2.199695  |
| ENSMUSG AU041133  | 1.661064 | 1.348148 | 1.109172 | 1.410165 | 1.003143 | 1.055945  |
| ENSMUSG Smim24    | 2.13764  | 2.642316 | 2.599484 | 2.897841 | 2.415836 | 4.029098  |
| ENSMUSG Sval2     | 0        | 0        | 0        | 0        | 0        | 0         |
| ENSMUSG Scgb1b15  | 0        | 0        | 0        | 0        | 0        | 0         |
| ENSMUSG Vmn2r28   | 0        | 0        | 0        | 0        | 0        | 0         |
| ENSMUSG Mcf2l     | 52.77558 | 49.57677 | 42.42364 | 28.41954 | 27.54367 | 18.59851  |
| ENSMUSG Vmn2r37   | 0        | 0        | 0        | 0        | 0        | 0         |
| ENSMUSG Zfp810    | 4.850719 | 5.138845 | 4.218807 | 5.290682 | 4.202258 | 4.498974  |
| ENSMUSG Pgm2l1    | 4.274086 | 4.21333  | 3.414256 | 3.107953 | 3.741264 | 2.751712  |
| ENSMUSG Icam2     | 105.1766 | 94.97462 | 141.9005 | 74.59706 | 65.80405 | 66.071085 |
| ENSMUSG Fam91a1   | 20.4316  | 21.70005 | 17.35965 | 18.71938 | 19.11867 | 19.749855 |
| ENSMUSG Gm9903    | 0.036918 | 0.064921 | 0.138766 | 0.128694 | 0.113276 | 0.031629  |
| ENSMUSG S100a5    | 0        | 0        | 0        | 0        | 0        | 0         |
| ENSMUSG S100a3    | 0.335831 | 0.305735 | 0.432068 | 0.489109 | 0.219993 | 0.151333  |

|                   |          |          |          |          |          |           |
|-------------------|----------|----------|----------|----------|----------|-----------|
| ENSMUSG S100a4    | 13.80264 | 9.077026 | 16.18812 | 26.41253 | 18.92267 | 30.577537 |
| ENSMUSG Scn4a     | 0.258451 | 0.195822 | 0.106641 | 0.352938 | 0.23819  | 0.325048  |
| ENSMUSG Lipt2     | 1.396724 | 1.074597 | 0.802833 | 0.741478 | 1.186277 | 1.427194  |
| ENSMUSG Pold3     | 8.205118 | 7.561639 | 7.706136 | 7.3218   | 8.753863 | 7.174038  |
| ENSMUSG Rabep2    | 12.42425 | 12.49677 | 12.45146 | 12.43796 | 10.88061 | 12.01983  |
| ENSMUSG Hoxc6     | 0        | 0        | 0.032056 | 0.058776 | 0.031411 | 0         |
| ENSMUSG Arid4a    | 17.3213  | 16.93291 | 17.00295 | 14.52899 | 13.80813 | 12.882738 |
| ENSMUSG Olfr303   | 0        | 0        | 0        | 0        | 0        | 0         |
| ENSMUSG Ifna13    | 0        | 0        | 0        | 0        | 0        | 0         |
| ENSMUSG Rbms3     | 9.609297 | 9.833909 | 7.695848 | 6.20954  | 6.024061 | 5.610361  |
| ENSMUSG Rcan2     | 19.35804 | 16.5185  | 15.59422 | 9.54849  | 10.68705 | 8.728037  |
| ENSMUSG Coprs     | 4.4811   | 5.289714 | 5.668997 | 4.864991 | 5.277767 | 5.920438  |
| ENSMUSG Rab39     | 0.683141 | 0.395927 | 0.529837 | 0.617754 | 0.838953 | 0.928123  |
| ENSMUSG Gas6      | 182.9804 | 181.7448 | 179.3694 | 161.2639 | 167.5161 | 180.33525 |
| ENSMUSG Smyd3     | 1.921656 | 2.000225 | 1.793619 | 1.821069 | 1.863595 | 1.696439  |
| ENSMUSG Rasa3     | 18.21082 | 15.78698 | 18.86538 | 22.05274 | 21.73283 | 22.571948 |
| ENSMUSG 1700029H  | 0        | 0        | 0        | 0.0241   | 0        | 0         |
| ENSMUSG 4921501E  | 0        | 0        | 0        | 0        | 0        | 0         |
| ENSMUSG Agap3     | 34.36977 | 32.74481 | 35.58061 | 27.71859 | 28.80719 | 29.436616 |
| ENSMUSG Acap1     | 4.447879 | 3.26887  | 6.132958 | 7.746316 | 6.331063 | 7.06338   |
| ENSMUSG Degs2     | 0.394959 | 0.912036 | 0.343901 | 1.092593 | 0.421868 | 0.579715  |
| ENSMUSG Evi       | 18.84103 | 21.37047 | 25.58288 | 32.09299 | 30.65389 | 36.280784 |
| ENSMUSG Hhip1     | 0.577868 | 0.354428 | 0.335685 | 0.302964 | 0.249007 | 0.470896  |
| ENSMUSG Wars      | 66.87069 | 70.17664 | 259.4934 | 135.2291 | 56.18932 | 60.838354 |
| ENSMUSG Slc25a29  | 5.567482 | 7.832211 | 6.259044 | 4.190962 | 4.266997 | 4.466703  |
| ENSMUSG Yy1       | 19.65486 | 18.61688 | 16.63477 | 15.50524 | 15.37572 | 15.552648 |
| ENSMUSG Gabrd     | 0        | 0        | 0        | 0        | 0        | 0         |
| ENSMUSG Plch2     | 1.24952  | 1.65311  | 1.02819  | 2.490914 | 1.887934 | 1.949395  |
| ENSMUSG Pank4     | 8.17713  | 8.873568 | 9.432362 | 8.555924 | 9.303541 | 9.07721   |
| ENSMUSG Poc1a     | 2.849795 | 2.083505 | 2.645022 | 2.420966 | 2.095872 | 2.70287   |
| ENSMUSG Ski       | 56.37053 | 52.67862 | 52.47971 | 40.44177 | 41.791   | 41.077568 |
| ENSMUSG Gm21800   | 0        | 0        | 0        | 0        | 0        | 0         |
| ENSMUSG Prkcz     | 19.02428 | 19.76017 | 15.89002 | 14.81255 | 14.19759 | 15.494444 |
| Mus_musc Mus_musc | 0.208011 | 0.408182 | 0.205069 | 0.441319 | 0.236061 | 0.319417  |
| Mus_musc Mus_musc | 0.234262 | 0.095646 | 0        | 0        | 0        | 0         |
| Mus_musc Mus_musc | 0.627562 | 1.342052 | 1.414641 | 0.966421 | 0.538581 | 0.730354  |
| Mus_musc Mus_musc | 0        | 0.251591 | 0        | 0        | 0        | 0         |
| ENSMUSG Tnnc1     | 1.909784 | 13.71025 | 3.475288 | 4.525023 | 3.107224 | 2.312419  |
| ENSMUSG Gm17019   | 0.011489 | 0        | 0        | 0.203219 | 0        | 0         |
| ENSMUSG Ube2d2a   | 42.52115 | 39.23043 | 38.88626 | 38.18815 | 40.82574 | 39.951229 |
| ENSMUSG Chga      | 0.049529 | 0.130216 | 0.092498 | 0.167455 | 0.145448 | 0.144375  |
| ENSMUSG Pfkp      | 12.88416 | 13.13164 | 15.05665 | 19.19152 | 17.33792 | 20.662663 |
| ENSMUSG Lgmn      | 45.30232 | 45.69297 | 55.2427  | 146.7728 | 159.5937 | 171.76867 |
| ENSMUSG Pitrm1    | 8.748824 | 9.28012  | 8.080857 | 8.429733 | 7.950682 | 8.741948  |
| ENSMUSG Golga5    | 14.40578 | 14.99838 | 14.42632 | 14.66557 | 15.59374 | 14.680082 |
| ENSMUSG Amd2      | 2.639392 | 5.718792 | 5.771485 | 1.822898 | 4.810908 | 5.190405  |
| ENSMUSG Brpf3     | 10.71719 | 10.21297 | 9.446309 | 7.030581 | 6.677858 | 6.418535  |
| ENSMUSG Unc79     | 0.403886 | 0.651519 | 0.213033 | 0.309948 | 0.246093 | 0.208252  |
| ENSMUSG Hist2h2aa | 6.772204 | 16.47789 | 5.417923 | 4.776637 | 5.04117  | 27.087551 |
| Mus_musc Mus_musc | 0        | 0        | 0        | 0.222678 | 0.19964  | 0         |
| Mus_musc Mus_musc | 0        | 0        | 0        | 0.192613 | 0        | 0         |
| ENSMUSG Ctag2     | 0        | 0        | 0        | 0        | 0        | 0         |
| Mus_musc Mus_musc | 0.217669 | 0.386838 | 0.126501 | 0.082359 | 0.135775 | 0.361736  |
| Mus_musc Mus_musc | 0.220977 | 0        | 0        | 0        | 0        | 0         |
| Mus_musc Mus_musc | 0.780615 | 1.220279 | 0.789646 | 1.043335 | 1.422377 | 1.254025  |
| ENSMUSG Aff2      | 0.806897 | 0.928756 | 0.674661 | 0.665401 | 0.905683 | 0.355056  |
| Mus_musc Mus_musc | 0        | 0        | 0        | 0        | 0        | 0         |
| ENSMUSG Irgc1     | 0        | 0        | 0        | 0.046468 | 0        | 0         |
| ENSMUSG Zfp94     | 1.11392  | 1.136172 | 1.450081 | 1.576454 | 1.003297 | 1.103812  |
| ENSMUSG Ddt       | 20.38179 | 27.17534 | 23.39959 | 24.92307 | 22.21453 | 23.399021 |
| ENSMUSG Adck5     | 4.053276 | 3.904916 | 3.919502 | 4.258089 | 3.447676 | 3.795942  |
| ENSMUSG Cyc1      | 42.85109 | 44.11125 | 41.39238 | 47.31543 | 47.97224 | 47.128733 |
| ENSMUSG Sharpin   | 16.24371 | 14.9238  | 19.39515 | 18.21241 | 15.6045  | 16.625094 |
| ENSMUSG Maf1      | 58.14917 | 59.54869 | 59.44532 | 52.0736  | 48.46255 | 47.862314 |

|                   |          |          |          |          |          |           |
|-------------------|----------|----------|----------|----------|----------|-----------|
| ENSMUSG Hgh1      | 3.261775 | 2.594029 | 2.97465  | 3.666345 | 2.950779 | 3.76385   |
| ENSMUSG Dgat1     | 7.489737 | 7.647789 | 7.705699 | 6.474544 | 5.549697 | 5.808371  |
| ENSMUSG Hsf1      | 16.61261 | 17.6243  | 19.51823 | 14.97389 | 15.62363 | 15.507529 |
| ENSMUSG Bop1      | 12.59654 | 11.94449 | 12.86025 | 12.81463 | 11.70203 | 14.399956 |
| ENSMUSG Mroh1     | 12.618   | 12.46541 | 11.94557 | 14.91692 | 13.6544  | 15.146514 |
| ENSMUSG Fbxl6     | 13.24956 | 10.64865 | 12.2334  | 12.62146 | 13.3782  | 12.609919 |
| ENSMUSG Hrc       | 0.323498 | 3.452934 | 0.530526 | 1.130419 | 0.765973 | 0.433613  |
| ENSMUSG Tecpr2    | 2.90051  | 3.248468 | 2.689286 | 3.318237 | 3.115275 | 3.748089  |
| ENSMUSG Trmt10b   | 6.319453 | 6.106919 | 5.471395 | 5.470432 | 6.51843  | 4.634692  |
| ENSMUSG Hoxa7     | 7.549422 | 5.394128 | 5.435265 | 2.849088 | 3.391449 | 4.60017   |
| ENSMUSG Ky        | 0.238961 | 0.33754  | 0.183089 | 0.287244 | 0.280087 | 0.152852  |
| ENSMUSG F11r      | 77.16444 | 70.72099 | 80.18343 | 53.45407 | 54.43745 | 51.669216 |
| ENSMUSG Ntn3      | 0.272599 | 0.216142 | 0.405725 | 0.243064 | 0.196168 | 0.328385  |
| ENSMUSG Hsp90aa1  | 130.9024 | 207.8334 | 186.9496 | 146.6901 | 162.5692 | 171.8457  |
| ENSMUSG Egf       | 0.137353 | 0.150679 | 0.158875 | 0.09218  | 0.102738 | 0.118925  |
| ENSMUSG Slit1     | 0.012529 | 0.016756 | 0        | 0        | 0        | 0.009708  |
| ENSMUSG Ctso      | 20.54851 | 18.56292 | 19.72257 | 17.72112 | 18.02486 | 17.440166 |
| ENSMUSG Ppa2      | 16.99744 | 18.33614 | 15.27421 | 16.78044 | 15.82326 | 15.653067 |
| ENSMUSG Rrh       | 0        | 0        | 0        | 0        | 0        | 0.060784  |
| ENSMUSG Xpnpep1   | 16.88551 | 17.08857 | 18.13584 | 15.97545 | 16.1085  | 17.967808 |
| ENSMUSG Gar1      | 6.038714 | 5.592582 | 6.661524 | 4.494558 | 5.55651  | 4.625998  |
| ENSMUSG Zfp616    | 0        | 0        | 0        | 0        | 0        | 0         |
| ENSMUSG Pdgfc     | 1.273595 | 1.6055   | 1.006084 | 3.027451 | 3.088276 | 3.155632  |
| ENSMUSG Gstcd     | 3.501126 | 3.242866 | 2.73775  | 2.868087 | 2.829191 | 3.387492  |
| Mus_musc Mus_musc | 0.915227 | 0.934529 | 0.78513  | 1.10728  | 0.956736 | 0.313392  |
| ENSMUSG Ccnl2     | 39.43522 | 34.83142 | 44.57877 | 36.56278 | 29.7053  | 31.036228 |
| Mus_musc Mus_musc | 0.136305 | 0        | 0.384974 | 0        | 0        | 0         |
| Mus_musc Mus_musc | 0        | 0        | 0.168936 | 0        | 0        | 0         |
| ENSMUSG Tmsb15l   | 1.448198 | 1.223794 | 1.85197  | 2.007348 | 1.262839 | 1.104744  |
| ENSMUSG Mmp23     | 6.865638 | 8.033731 | 8.119656 | 8.147718 | 8.401937 | 8.208618  |
| ENSMUSG Akap1     | 8.24041  | 7.021612 | 7.829416 | 6.773771 | 6.570522 | 6.938179  |
| ENSMUSG Dhx40     | 13.54154 | 13.00127 | 11.51146 | 13.9055  | 13.94919 | 12.385232 |
| ENSMUSG Ypel2     | 3.923018 | 5.046187 | 4.87829  | 6.410907 | 6.402889 | 6.867673  |
| ENSMUSG Nadk      | 56.833   | 55.63259 | 61.51713 | 58.7041  | 58.53659 | 57.591403 |
| ENSMUSG Cdk11b    | 30.84789 | 31.20935 | 31.63989 | 25.47933 | 25.86967 | 25.186501 |
| ENSMUSG Nubp2     | 20.51601 | 18.3076  | 17.60185 | 19.47814 | 17.9676  | 21.395253 |
| ENSMUSG AW209491  | 6.223309 | 7.271549 | 5.1123   | 5.086281 | 6.123081 | 5.542532  |
| ENSMUSG Car12     | 0.146843 | 0.091066 | 0.090651 | 0.098388 | 0.169209 | 0.097744  |
| ENSMUSG Plscr2    | 20.29869 | 19.53678 | 17.99085 | 10.44709 | 9.200645 | 9.77582   |
| ENSMUSG Fanci     | 0.158603 | 0.272264 | 0.145563 | 0.381681 | 0.479494 | 0.478194  |
| ENSMUSG Plod2     | 16.61582 | 16.50332 | 17.62068 | 11.85809 | 11.22887 | 10.730857 |
| ENSMUSG Plscr4    | 16.9761  | 16.92893 | 16.14129 | 10.01486 | 8.802888 | 8.10638   |
| ENSMUSG Doc2a     | 0.121341 | 0.078969 | 0.048019 | 0.109317 | 0.108949 | 0         |
| ENSMUSG Iglon5    | 0.107498 | 0.098643 | 0.047743 | 0.171892 | 0.300545 | 0.159951  |
| ENSMUSG Smarce1   | 24.20771 | 25.41156 | 26.23908 | 22.33765 | 21.61602 | 20.871161 |
| ENSMUSG Scarb1    | 46.68249 | 41.70303 | 50.24646 | 37.66382 | 41.9376  | 36.416699 |
| ENSMUSG Bicd2     | 33.73303 | 29.17009 | 32.76824 | 24.89239 | 23.95824 | 23.560993 |
| ENSMUSG Chchd5    | 6.63829  | 5.315109 | 6.538147 | 6.718468 | 6.26455  | 7.992849  |
| ENSMUSG Hnrnpc    | 73.17592 | 88.02827 | 78.46206 | 81.05885 | 89.31844 | 77.413524 |
| ENSMUSG Caln1     | 0.006048 | 0.006618 | 0.005434 | 0        | 0        | 0.010901  |
| ENSMUSG Bckdha    | 27.44288 | 26.73652 | 24.62979 | 21.31959 | 24.43939 | 22.690794 |
| ENSMUSG Rpl36a-ps | 1.176348 | 0.360857 | 1.257427 | 0.34687  | 1.053627 | 0.442211  |
| ENSMUSG 311001810 | 0        | 0        | 0        | 0        | 0        | 0         |
| ENSMUSG Gjd2      | 0        | 0        | 0        | 0        | 0        | 0.035507  |
| ENSMUSG Actc1     | 26.97402 | 54.87761 | 28.85544 | 48.16295 | 43.07359 | 39.972087 |
| ENSMUSG Efcab1    | 2.800796 | 3.346302 | 1.622106 | 4.270927 | 3.792562 | 4.160095  |
| ENSMUSG Olfr398   | 0        | 0        | 0        | 0        | 0        | 0         |
| ENSMUSG Cbln2     | 0        | 0        | 0        | 0        | 0        | 0         |
| ENSMUSG Cndp2     | 46.20025 | 42.44309 | 47.9435  | 54.79015 | 59.16688 | 66.362345 |
| ENSMUSG Timm21    | 9.86114  | 10.51885 | 9.916677 | 10.59079 | 10.55074 | 9.534756  |
| ENSMUSG Tle4      | 9.806809 | 9.943236 | 10.23339 | 8.171193 | 8.32307  | 7.042212  |
| ENSMUSG Rapgef4   | 23.77992 | 18.88551 | 22.21799 | 8.950219 | 10.7283  | 8.278746  |
| ENSMUSG Armcx3    | 17.75502 | 15.44668 | 16.91574 | 13.67084 | 17.19465 | 15.791582 |
| ENSMUSG Dclre1c   | 2.626297 | 2.327297 | 2.208701 | 2.393366 | 1.977198 | 2.116848  |

|                   |          |          |          |          |          |           |
|-------------------|----------|----------|----------|----------|----------|-----------|
| ENSMUSG Cfpap126  | 14.28527 | 15.49468 | 13.65569 | 18.06127 | 19.65845 | 14.314639 |
| ENSMUSG Plxna2    | 12.40958 | 9.660536 | 12.03679 | 5.852499 | 6.49544  | 7.200839  |
| ENSMUSG Usf1      | 31.03536 | 29.61994 | 34.4196  | 31.76282 | 28.05307 | 29.74241  |
| ENSMUSG Nmt2      | 9.084766 | 11.18023 | 8.545685 | 8.936635 | 9.139066 | 9.198871  |
| ENSMUSG Acbd7     | 0.214235 | 0.151998 | 0        | 0.106886 | 0.289665 | 0         |
| ENSMUSG Olah      | 0        | 0        | 0        | 0        | 0        | 0         |
| ENSMUSG Suv39h2   | 0.370175 | 0.252998 | 0.516996 | 0.438357 | 0.300573 | 0.440746  |
| ENSMUSG Olfr482   | 0.123459 | 0.213977 | 0.246807 | 0.135376 | 0.212137 | 0.173256  |
| ENSMUSG Olfr128   | 0        | 0        | 0        | 0        | 0        | 0         |
| ENSMUSG Anks1     | 24.32303 | 23.11862 | 22.57675 | 17.82422 | 17.7058  | 17.209427 |
| ENSMUSG Srp72     | 22.58156 | 24.158   | 21.63613 | 26.38145 | 26.44934 | 26.122818 |
| ENSMUSG Qsox2     | 10.32003 | 8.919891 | 9.528525 | 7.325834 | 8.461929 | 7.799833  |
| ENSMUSG Spdef     | 0.474728 | 0.927006 | 0.449031 | 2.704082 | 2.210547 | 2.771615  |
| ENSMUSG Phf21a    | 10.62217 | 12.17765 | 11.02874 | 10.54529 | 10.08749 | 10.565907 |
| ENSMUSG Grm3      | 0        | 0        | 0.011081 | 0        | 0        | 0         |
| ENSMUSG Rpl8      | 562.5047 | 562.5836 | 599.1264 | 594.3743 | 581.5942 | 632.47839 |
| ENSMUSG Zfp583    | 0.730343 | 0.714149 | 1.108623 | 0.877402 | 1.107928 | 0.773424  |
| ENSMUSG Cyfip1    | 24.88003 | 25.83089 | 24.62488 | 20.90878 | 20.69254 | 22.007552 |
| ENSMUSG Zfp273    | 1.137908 | 1.540359 | 1.477769 | 1.302546 | 1.009026 | 1.107958  |
| ENSMUSG Pole      | 0.424469 | 0.507657 | 0.48637  | 0.719227 | 0.876582 | 1.017863  |
| ENSMUSG Wdr25     | 1.341199 | 0.975558 | 1.034952 | 0.908535 | 0.914285 | 1.649938  |
| ENSMUSG Osbpl10   | 7.308163 | 7.048157 | 5.543185 | 6.208321 | 6.152157 | 6.189533  |
| ENSMUSG Tc2n      | 3.927707 | 4.779872 | 3.43917  | 5.961372 | 4.863618 | 5.82336   |
| Mus_musc Mus_musc | 0        | 0.129672 | 0        | 0.208624 | 0.213886 | 0         |
| Mus_musc Mus_musc | 0        | 0        | 0.613142 | 0.417734 | 0        | 0         |
| Mus_musc Mus_musc | 0        | 0.164325 | 0.121829 | 0.311221 | 0        | 0         |
| Mus_musc Mus_musc | 0        | 0        | 0        | 0.256695 | 0.265642 | 0         |
| Mus_musc Mus_musc | 0.523708 | 0.112225 | 0.132636 | 0.157477 | 0.126905 | 0         |
| Mus_musc Mus_musc | 0        | 0        | 0        | 0.215379 | 0.470473 | 0.659159  |
| ENSMUSG Gm21319   | 0        | 0        | 0        | 0        | 0        | 0         |
| ENSMUSG Gm7137    | 0        | 0        | 0        | 0        | 0        | 0         |
| ENSMUSG Cacnb3    | 8.529282 | 8.106719 | 7.895792 | 9.323368 | 7.728755 | 11.06259  |
| ENSMUSG Fkbp11    | 6.555739 | 7.272402 | 6.635347 | 12.93232 | 14.91663 | 13.215864 |
| ENSMUSG Ccdc65    | 1.493959 | 2.503627 | 0.998324 | 3.094585 | 2.750666 | 2.573179  |
| ENSMUSG H2-M10.2  | 0        | 0        | 0        | 0.040667 | 0        | 0         |
| Mus_musc Mus_musc | 0.588177 | 1.130086 | 0.496218 | 1.237925 | 1.078583 | 1.202509  |
| Mus_musc Mus_musc | 1.730897 | 1.276085 | 3.147386 | 1.66211  | 1.184594 | 1.665398  |
| Mus_musc Mus_musc | 0.479975 | 0.259169 | 0.889137 | 0.383559 | 0.31435  | 0.298325  |
| Mus_musc Mus_musc | 0.210694 | 0.104984 | 0.71322  | 0.131158 | 0.33947  | 0.300167  |
| ENSMUSG Atxn3     | 10.06954 | 9.287387 | 8.606483 | 9.233439 | 9.1472   | 8.159139  |
| Mus_musc Mus_musc | 0        | 0.183255 | 0.098489 | 0.342396 | 0.177622 | 0         |
| Mus_musc Mus_musc | 0.734237 | 0.735334 | 0.186437 | 0.162611 | 0.309444 | 0.191974  |
| ENSMUSG Fxyd5     | 59.7742  | 64.70729 | 78.00632 | 74.82269 | 78.15984 | 84.238949 |
| ENSMUSG Bcr       | 18.73034 | 20.51494 | 19.23858 | 14.33486 | 14.97882 | 14.382422 |
| ENSMUSG Tgfb1i1   | 40.85591 | 37.63099 | 41.23069 | 25.58217 | 28.35126 | 27.430446 |
| ENSMUSG Ccdc85b   | 79.82908 | 58.91865 | 75.42306 | 53.16864 | 53.69444 | 51.217079 |
| ENSMUSG Olfr385   | 0        | 0        | 0        | 0        | 0        | 0         |
| ENSMUSG Vmn2r111  | 0        | 0        | 0        | 0        | 0        | 0         |
| Mus_musc Mus_musc | 0.400002 | 0.250395 | 0.446586 | 0.362534 | 0.203114 | 0         |
| Mus_musc Mus_musc | 0        | 0        | 0        | 0.061186 | 0.214997 | 0         |
| Mus_musc Mus_musc | 0.188031 | 0.16323  | 0        | 0        | 0        | 0         |
| Mus_musc Mus_musc | 0.23336  | 0.20299  | 0.18314  | 0.286531 | 0.176969 | 0.360424  |
| Mus_musc Mus_musc | 0.101054 | 0        | 0.140027 | 0.493201 | 0        | 0         |
| Mus_musc Mus_musc | 1.46947  | 0.1456   | 0.19664  | 0.168868 | 0.309869 | 0.043439  |
| Mus_musc Mus_musc | 0.283569 | 0.581032 | 0.272266 | 0.345217 | 0.855522 | 0.824069  |
| Mus_musc Mus_musc | 0.515181 | 0.105306 | 0        | 0.152852 | 0.314728 | 0.172986  |
| ENSMUSG Efcab14   | 20.96054 | 22.81266 | 21.56102 | 19.59572 | 21.45892 | 19.170529 |
| ENSMUSG Mrps17    | 13.11688 | 13.04628 | 14.32812 | 14.23901 | 11.37239 | 13.076043 |
| ENSMUSG Ankmy1    | 0.469434 | 0.430728 | 0.405452 | 0.877519 | 0.467779 | 0.726513  |
| ENSMUSG Vps18     | 6.805471 | 6.858007 | 7.354181 | 7.962441 | 8.309513 | 9.02106   |
| ENSMUSG Rdh16f2   | 0        | 0.059082 | 0        | 0        | 0        | 0.04969   |
| ENSMUSG Atm       | 3.473328 | 3.373778 | 2.649239 | 3.38505  | 3.398326 | 3.386153  |
| ENSMUSG 14-Sep    | 0        | 0        | 0        | 0        | 0        | 0         |
| ENSMUSG Tmem267   | 7.555902 | 9.015138 | 10.09624 | 13.33003 | 16.61797 | 10.938033 |

|                   |          |          |          |          |          |           |
|-------------------|----------|----------|----------|----------|----------|-----------|
| ENSMUSG 3110070M  | 1.057085 | 0.613129 | 1.104606 | 0.739078 | 0.705011 | 0.8512    |
| Mus_musc Mus_musc | 0.168239 | 0        | 0        | 0        | 0        | 0         |
| ENSMUSG Tas2r104  | 0        | 0        | 0        | 0        | 0        | 0         |
| Mus_musc Mus_musc | 6.356814 | 6.005686 | 5.875281 | 6.731945 | 5.464316 | 6.26187   |
| Mus_musc Mus_musc | 0.09642  | 0.179036 | 0.265116 | 0.303093 | 0.56227  | 0.597222  |
| Mus_musc Mus_musc | 0        | 0        | 0        | 0        | 0.186692 | 0         |
| Mus_musc Mus_musc | 0        | 0.199365 | 0.168936 | 0.228324 | 0        | 0         |
| Mus_musc Mus_musc | 0        | 0        | 0        | 0        | 0        | 0         |
| Mus_musc Mus_musc | 0        | 0        | 0        | 0        | 0        | 0         |
| Mus_musc Mus_musc | 0.153258 | 0.385617 | 0.166043 | 0.218673 | 0.194365 | 0.259248  |
| ENSMUSG Teddm2    | 0.036971 | 0.247638 | 0.050721 | 0        | 0.064069 | 0.050341  |
| ENSMUSG Ing1      | 27.25309 | 28.39441 | 26.85    | 19.82882 | 21.43673 | 19.210552 |
| ENSMUSG Wnk1      | 57.93821 | 59.64851 | 49.27807 | 58.01882 | 52.25264 | 51.089518 |
| ENSMUSG Gpr158    | 0        | 0.031503 | 0        | 0        | 0.015048 | 0         |
| ENSMUSG Abcb1b    | 2.515476 | 2.247067 | 1.860029 | 3.175631 | 3.856205 | 3.072197  |
| ENSMUSG Cort      | 0.445498 | 0        | 0.038928 | 0        | 0        | 0.13059   |
| ENSMUSG Car6      | 0        | 0        | 0        | 0        | 0.096265 | 0         |
| ENSMUSG Abcb8     | 4.225281 | 3.965955 | 4.059983 | 5.197593 | 6.403745 | 6.593614  |
| ENSMUSG Dffa      | 10.42499 | 10.95815 | 10.92752 | 9.528433 | 9.49807  | 10.318787 |
| ENSMUSG Pex14     | 16.85719 | 13.89035 | 15.08959 | 11.91022 | 12.40713 | 13.941871 |
| ENSMUSG Slc2a5    | 0        | 0.058147 | 0        | 0.016557 | 0        | 0.03167   |
| ENSMUSG Casz1     | 21.31382 | 18.55061 | 18.35676 | 12.89534 | 13.28296 | 12.516669 |
| ENSMUSG Nos3      | 6.702944 | 6.825109 | 6.289236 | 4.108535 | 4.849487 | 5.589589  |
| ENSMUSG Masp2     | 0.162393 | 0.201781 | 0.229129 | 0.626735 | 0.252072 | 0.477078  |
| ENSMUSG Mapk10    | 0.124086 | 0.478193 | 0.062926 | 0.126263 | 0.139793 | 0.089549  |
| ENSMUSG 4932414N  | 0        | 0        | 0        | 0        | 0        | 0         |
| ENSMUSG Csnk2a2   | 6.528632 | 6.983775 | 6.529801 | 6.238348 | 5.615935 | 5.886407  |
| Mus_musc Mus_musc | 0.07945  | 0        | 0        | 0.338449 | 0.253613 | 0.090623  |
| Mus_musc Mus_musc | 0        | 0        | 0        | 0.326609 | 0.328973 | 0         |
| Mus_musc Mus_musc | 0        | 0        | 0.169501 | 0.088463 | 0        | 0         |
| Mus_musc Mus_musc | 0        | 0        | 0        | 0        | 0        | 0         |
| Mus_musc Mus_musc | 0        | 0        | 0.051778 | 0        | 0.059066 | 0.367332  |
| Mus_musc Mus_musc | 0.105768 | 0.025038 | 0        | 0        | 0.148097 | 0         |
| Mus_musc Mus_musc | 0        | 0.382687 | 0        | 0        | 0        | 0         |
| Mus_musc Mus_musc | 0.177784 | 0        | 0.046952 | 0.066382 | 0.076305 | 0         |
| Mus_musc Mus_musc | 0.201029 | 0.165845 | 0.323566 | 0.243364 | 0.628084 | 0.479187  |
| ENSMUSG Ints6     | 3.419779 | 3.971481 | 3.665107 | 3.072133 | 3.432092 | 3.007255  |
| ENSMUSG Bpi       | 0        | 0        | 0        | 0        | 0        | 0         |
| ENSMUSG Usp9y     | 0        | 0        | 0        | 0        | 0        | 0         |
| ENSMUSG Kcne3     | 0.625254 | 1.058858 | 0.348736 | 2.030858 | 2.095236 | 1.701451  |
| ENSMUSG Zc3h12c   | 4.624589 | 4.759405 | 4.23257  | 3.101624 | 3.874777 | 3.331554  |
| ENSMUSG Tanc1     | 17.81012 | 13.86865 | 14.41587 | 10.1099  | 11.0774  | 10.069168 |
| ENSMUSG Cyp2j8    | 0        | 0.023065 | 0        | 0.030844 | 0        | 0         |
| ENSMUSG Dctpp1    | 5.519948 | 4.985439 | 7.127806 | 9.080503 | 9.242929 | 10.238685 |
| ENSMUSG C1galt1   | 14.23394 | 14.25869 | 13.21052 | 15.00718 | 14.09395 | 13.83356  |
| ENSMUSG Abca14    | 0.03468  | 0        | 0.02529  | 0.029897 | 0        | 0         |
| ENSMUSG Gemin7    | 33.2748  | 36.1509  | 45.8424  | 34.96145 | 35.46002 | 36.498662 |
| ENSMUSG Kcnj10    | 0.122028 | 0.302797 | 0.150065 | 0.47181  | 0.303638 | 0.349467  |
| ENSMUSG Olfr670   | 0        | 0        | 0        | 0        | 0        | 0         |
| ENSMUSG Ccnjl     | 0.504068 | 1.061858 | 0.647072 | 1.125113 | 1.229431 | 1.290682  |
| ENSMUSG Il27      | 0.078929 | 0.10166  | 0.719049 | 0.147805 | 0.035198 | 0.145254  |
| ENSMUSG Tmem201   | 5.413806 | 5.287356 | 5.551907 | 4.445186 | 4.308505 | 4.378465  |
| ENSMUSG Phf11a    | 0.244135 | 0.295399 | 1.084922 | 0.895271 | 0.437914 | 0.659751  |
| ENSMUSG Palb2     | 0.658004 | 0.562707 | 0.688172 | 0.571608 | 0.97853  | 1.067768  |
| ENSMUSG Gm12695   | 1.086316 | 1.150188 | 0.25926  | 1.463509 | 1.060146 | 1.389039  |
| ENSMUSG Lrrc37a   | 0        | 0        | 0        | 0.008117 | 0        | 0         |
| ENSMUSG Tomt      | 0.242627 | 0.291466 | 0.27607  | 0.116868 | 0.160508 | 0.232581  |
| ENSMUSG Kansl3    | 20.14369 | 20.20323 | 19.27596 | 18.94769 | 15.72759 | 16.460903 |
| ENSMUSG Scrn3     | 10.71427 | 11.15382 | 9.336754 | 7.215254 | 7.774801 | 7.557312  |
| ENSMUSG Sox15     | 0        | 0.036023 | 0.146176 | 0        | 0        | 0         |
| ENSMUSG Tmem182   | 0.101631 | 0.783534 | 0.084344 | 0.172543 | 0.109912 | 0.145939  |
| ENSMUSG Gm7073    | 0        | 0        | 0        | 0        | 0        | 0         |
| ENSMUSG Tmem217   | 0        | 0        | 0        | 0.034127 | 0.023693 | 0.030868  |
| ENSMUSG Gm364     | 0        | 0        | 0        | 0        | 0        | 0         |

|                    |          |          |          |          |          |           |
|--------------------|----------|----------|----------|----------|----------|-----------|
| ENSMUSG Dpp9       | 18.55664 | 21.53497 | 20.90395 | 19.33147 | 21.88414 | 22.912657 |
| ENSMUSG Uhrf1      | 0.961487 | 1.140408 | 1.179665 | 2.773987 | 4.11376  | 4.488395  |
| ENSMUSG Gm11027    | 0        | 0        | 0        | 0        | 0        | 0         |
| ENSMUSG Slc26a3    | 0        | 0        | 0.049438 | 0.052181 | 0.035567 | 0.035976  |
| ENSMUSG Sema6b     | 4.221515 | 4.095984 | 4.332202 | 3.1685   | 3.448342 | 3.528522  |
| ENSMUSG Zscan5b    | 0        | 0        | 0        | 0        | 0        | 0         |
| ENSMUSG Adtrp      | 0.396892 | 0.145835 | 0.134595 | 0.816551 | 0.544864 | 0.798597  |
| ENSMUSG Gm14226    | 0        | 0        | 0        | 0        | 0        | 0         |
| Mus_musc Mus_musc  | 3.839029 | 4.08585  | 2.086717 | 1.669965 | 2.092546 | 1.593484  |
| Mus_musc Mus_musc  | 3.330646 | 4.217185 | 4.468029 | 3.942325 | 3.526434 | 5.483326  |
| Mus_musc Mus_musc  | 0        | 0.256238 | 0.094862 | 0.088977 | 0.064563 | 0.078155  |
| ENSMUSG Bcam       | 299.6078 | 278.2426 | 305.9307 | 201.3784 | 202.7378 | 221.31709 |
| Mus_musc Mus_musc  | 0.61185  | 0.535421 | 0.833563 | 0.453455 | 0.484037 | 0.733914  |
| ENSMUSG Vmn1r76    | 0        | 0        | 0        | 0        | 0        | 0         |
| ENSMUSG Rad18      | 1.459223 | 1.984271 | 1.607483 | 1.867792 | 1.669633 | 1.888193  |
| Mus_musc Mus_musc  | 0        | 0        | 0        | 0.228468 | 0        | 0         |
| Mus_musc Mus_musc  | 0        | 0        | 0        | 0        | 0.2731   | 0.138633  |
| Mus_musc Mus_musc  | 0.067627 | 0.005902 | 0        | 0.048461 | 0        | 0.093879  |
| Mus_musc Mus_musc  | 3.346374 | 3.745116 | 3.053291 | 3.315564 | 2.925732 | 2.97387   |
| ENSMUSG Slx1b      | 4.775898 | 4.185691 | 5.658104 | 4.044911 | 4.186026 | 3.678835  |
| ENSMUSG Bhlhe41    | 2.771274 | 1.896319 | 2.274741 | 3.428088 | 3.864027 | 3.815683  |
| ENSMUSG Olfr722    | 0        | 0        | 0        | 0        | 0        | 0         |
| ENSMUSG Tor1aip2   | 27.86584 | 28.42163 | 29.33608 | 23.9487  | 25.11169 | 25.925172 |
| ENSMUSG Maml1      | 10.3114  | 8.820611 | 9.037014 | 8.22487  | 8.333355 | 8.375603  |
| Mus_musc Mus_musc  | 0.047886 | 0.107938 | 0        | 0.044317 | 0.112047 | 0         |
| Mus_musc Mus_musc  | 0.110851 | 0.207446 | 0.189879 | 0.444868 | 0.111604 | 0.158816  |
| Mus_musc Mus_musc  | 1.387061 | 0.23904  | 0.358524 | 0.146815 | 0        | 0.225527  |
| Mus_musc Mus_musc  | 0        | 0.288415 | 0        | 0        | 0        | 0         |
| Mus_musc Mus_musc  | 0.599116 | 0.772231 | 0.459986 | 0.511245 | 0.372143 | 0.294453  |
| ENSMUSG Cog6       | 11.57402 | 12.3494  | 11.75703 | 11.93532 | 11.9906  | 11.935261 |
| ENSMUSG Nipsnap3a  | 0        | 0        | 0        | 0        | 0        | 0         |
| ENSMUSG Abca1      | 18.07443 | 16.71889 | 14.42224 | 16.43738 | 17.27145 | 17.945639 |
| ENSMUSG Gpr183     | 1.911032 | 1.36232  | 1.544412 | 4.815968 | 4.575369 | 3.901179  |
| ENSMUSG C1d        | 8.421325 | 7.997347 | 7.389908 | 8.807156 | 7.875134 | 7.402996  |
| ENSMUSG 3100002H   | 0        | 0        | 0        | 0        | 0        | 0         |
| ENSMUSG Dlk2       | 0.108776 | 0.082292 | 0        | 0.087643 | 0        | 0         |
| ENSMUSG Tbc1d2     | 2.735287 | 2.739588 | 2.714209 | 2.346536 | 2.571119 | 3.223921  |
| ENSMUSG Ai837181   | 23.15642 | 24.0424  | 25.00366 | 22.0633  | 20.17953 | 21.472956 |
| ENSMUSG Rock2      | 30.5353  | 32.85718 | 31.00128 | 23.7564  | 23.92331 | 22.896541 |
| ENSMUSG Xkr5       | 0.053283 | 0        | 0        | 0.083392 | 0.111451 | 0.128339  |
| ENSMUSG C130032N   | 0        | 0        | 0        | 0        | 0        | 0         |
| ENSMUSG AF366264   | 0        | 0        | 0        | 0        | 0        | 0         |
| ENSMUSG Cntrl      | 7.908916 | 8.286532 | 7.487588 | 9.20029  | 8.540371 | 9.760872  |
| ENSMUSG Npm1       | 97.41743 | 99.42449 | 104.503  | 119.5625 | 119.1973 | 121.24523 |
| ENSMUSG Gm45716    | 0.61027  | 0.666336 | 0.517131 | 0.606324 | 0.596362 | 0.642671  |
| ENSMUSG Prpsap1    | 26.6088  | 19.879   | 23.8212  | 18.24127 | 21.48482 | 19.139096 |
| ENSMUSG Arl13a     | 0        | 0        | 0        | 0        | 0        | 0         |
| ENSMUSG St6galnac3 | 2.057915 | 1.88149  | 1.565841 | 1.494418 | 1.145141 | 1.312385  |
| ENSMUSG Snap47     | 16.39614 | 15.18308 | 14.36259 | 12.90253 | 11.82212 | 14.128417 |
| ENSMUSG Zfp932     | 3.379836 | 2.580409 | 2.907173 | 3.014015 | 2.934476 | 2.60751   |
| ENSMUSG Atp6v0d1   | 57.96684 | 55.42542 | 55.07697 | 55.81845 | 60.33005 | 65.38942  |
| ENSMUSG Npy2r      | 0.078812 | 0.050595 | 0.071311 | 0.02902  | 0        | 0.061651  |
| ENSMUSG Maoa       | 14.23827 | 15.43045 | 13.08475 | 10.56249 | 12.28505 | 11.320167 |
| ENSMUSG Arl3       | 30.95516 | 36.34295 | 33.80753 | 30.58461 | 27.10125 | 30.291313 |
| ENSMUSG Aox1       | 14.41781 | 15.24109 | 11.55484 | 8.454294 | 9.056984 | 9.054116  |
| ENSMUSG Nup98      | 12.46408 | 11.57835 | 10.72433 | 10.26299 | 10.64782 | 10.108337 |
| ENSMUSG Olfr308    | 0        | 0        | 0        | 0        | 0        | 0         |
| ENSMUSG Dedd2      | 15.32409 | 18.56159 | 17.18319 | 12.08757 | 12.27914 | 15.447139 |
| ENSMUSG Gm6904     | 0.08899  | 0.180428 | 0.216908 | 0.371867 | 0.049896 | 0.284894  |
| ENSMUSG Npas2      | 0.389262 | 1.059693 | 0.726033 | 2.729004 | 2.221988 | 2.521912  |
| ENSMUSG Sh2d4b     | 0.441655 | 0.401648 | 0.341911 | 0.580395 | 0.768683 | 0.630566  |
| ENSMUSG Gm17428    | 0        | 0        | 0        | 0        | 0        | 0         |
| ENSMUSG Tas2r130   | 0        | 0        | 0        | 0        | 0        | 0         |
| ENSMUSG Olfr1168   | 0        | 0        | 0        | 0        | 0        | 0         |



|                   |          |          |          |          |          |           |
|-------------------|----------|----------|----------|----------|----------|-----------|
| ENSMUSG Bmp4      | 41.8622  | 31.16717 | 38.08352 | 29.47202 | 24.83654 | 24.984209 |
| ENSMUSG Psmc6     | 28.13977 | 29.89572 | 29.56648 | 30.48402 | 28.14495 | 29.937597 |
| ENSMUSG Txndc16   | 11.00833 | 10.29312 | 9.381803 | 9.302054 | 9.556321 | 9.032065  |
| ENSMUSG Ero1l     | 13.51366 | 14.19096 | 15.12109 | 13.61644 | 13.73511 | 13.403969 |
| ENSMUSG Samd4     | 8.403492 | 9.122852 | 7.944793 | 6.059072 | 6.607324 | 6.194243  |
| ENSMUSG Olfr195   | 0        | 0        | 0        | 0        | 0        | 0         |
| ENSMUSG Kcnj15    | 24.81408 | 31.45457 | 19.54046 | 39.06803 | 50.95252 | 46.070316 |
| ENSMUSG Srpk2     | 8.480943 | 9.000659 | 7.739773 | 8.901689 | 8.507816 | 8.962661  |
| ENSMUSG Spx       | 0.255714 | 0.443417 | 0.27768  | 0.322642 | 0.129168 | 0.253321  |
| ENSMUSG Mboat4    | 0        | 0        | 0        | 0        | 0.055723 | 0.053771  |
| ENSMUSG Ppard     | 10.07046 | 9.471287 | 10.18615 | 9.478591 | 9.832016 | 9.666996  |
| ENSMUSG Dnm2      | 52.4813  | 53.07318 | 52.41009 | 47.97763 | 43.37638 | 46.764526 |
| ENSMUSG Olfr1225  | 0        | 0        | 0        | 0        | 0        | 0         |
| ENSMUSG Gm10424   | 0        | 0        | 0        | 0        | 0        | 0         |
| ENSMUSG Def6      | 7.27068  | 6.086    | 7.124347 | 9.418273 | 9.575468 | 9.042998  |
| ENSMUSG Gm28102   | 0        | 0        | 0        | 0        | 0        | 0         |
| ENSMUSG Olfr61    | 0        | 0        | 0        | 0        | 0        | 0         |
| ENSMUSG Olfr486   | 0        | 0        | 0        | 0        | 0        | 0         |
| ENSMUSG Olfr325   | 0        | 0        | 0        | 0        | 0        | 0         |
| ENSMUSG Abhd17c   | 28.78612 | 28.26838 | 28.26873 | 21.29793 | 23.56111 | 22.478952 |
| ENSMUSG Srcin1    | 1.522129 | 1.583689 | 1.541648 | 1.732903 | 1.65269  | 1.684159  |
| ENSMUSG Spsb2     | 14.33435 | 11.45949 | 12.22899 | 9.872591 | 10.26218 | 10.01938  |
| ENSMUSG Dennd2a   | 7.93644  | 8.005595 | 8.628407 | 5.692211 | 6.734959 | 5.474842  |
| ENSMUSG Tmem255l  | 0.802528 | 1.141982 | 0.659526 | 0.820831 | 0.80512  | 0.539111  |
| ENSMUSG Kctd13    | 6.503801 | 5.335806 | 5.830278 | 4.582356 | 4.915267 | 6.666971  |
| ENSMUSG Sez6l2    | 0.111624 | 0.222306 | 0.245966 | 0.183805 | 0.152025 | 0.239113  |
| ENSMUSG Cdipt     | 66.70239 | 54.76153 | 65.17754 | 48.67262 | 48.23356 | 49.607673 |
| ENSMUSG Mvp       | 33.42654 | 30.78548 | 36.53425 | 31.86109 | 31.7986  | 34.801415 |
| ENSMUSG Pagr1a    | 9.929174 | 9.582512 | 10.87438 | 8.072689 | 2.678364 | 11.191258 |
| ENSMUSG Ino80e    | 21.6937  | 23.43656 | 24.31629 | 18.50433 | 17.38185 | 17.796684 |
| ENSMUSG Stard10   | 40.13247 | 46.14545 | 37.86323 | 38.45022 | 42.0508  | 40.797804 |
| ENSMUSG Cryz12    | 3.885822 | 2.842085 | 2.314571 | 4.273927 | 4.265076 | 5.274807  |
| ENSMUSG Gm28729   | 2.327368 | 2.614458 | 1.351919 | 3.775681 | 2.683798 | 2.622028  |
| ENSMUSG Fam240a   | 0        | 0        | 0        | 0        | 0        | 0         |
| ENSMUSG Vmn2r35   | 0        | 0        | 0        | 0        | 0        | 0         |
| ENSMUSG Catsper2  | 0.784931 | 0.613836 | 0.959733 | 0.42281  | 0.562814 | 0.540954  |
| ENSMUSG Fndc3a    | 17.67431 | 19.26517 | 16.88657 | 21.84176 | 22.14485 | 22.267552 |
| ENSMUSG Gm3636    | 0.140431 | 0.270945 | 0.069406 | 0.304877 | 0.192947 | 0.339046  |
| ENSMUSG Gm3095    | 0        | 0        | 0        | 0        | 0        | 0         |
| ENSMUSG Vmn2r27   | 0        | 0        | 0        | 0        | 0        | 0         |
| ENSMUSG Aff4      | 24.42819 | 25.43983 | 20.09138 | 18.58566 | 20.50464 | 19.785166 |
| ENSMUSG Acrbp     | 1.778326 | 1.624603 | 3.578822 | 2.077374 | 2.031495 | 1.815817  |
| ENSMUSG Grcc10    | 54.91325 | 53.80867 | 57.56769 | 58.04027 | 49.89104 | 54.522102 |
| ENSMUSG Zfp951    | 0.507466 | 0.356707 | 0.425191 | 0.371104 | 0.271618 | 0.36989   |
| ENSMUSG 9030025P2 | 6.033005 | 5.910291 | 6.993643 | 5.723317 | 5.259547 | 5.805452  |
| ENSMUSG Ttc13     | 11.57147 | 10.17536 | 11.21486 | 11.78033 | 13.83432 | 13.400585 |
| ENSMUSG Banf2     | 0        | 0        | 0        | 0        | 0        | 0         |
| ENSMUSG Man1c1    | 10.16706 | 10.47273 | 10.08866 | 12.28805 | 12.15933 | 13.520013 |
| ENSMUSG Hsd3b6    | 0        | 0        | 0        | 0        | 0        | 0         |
| ENSMUSG Tbx15     | 0        | 0.055692 | 0.036099 | 0.04226  | 0.057694 | 0.07541   |
| ENSMUSG Spag17    | 0.824883 | 1.01768  | 0.636541 | 1.284996 | 1.250839 | 1.146861  |
| ENSMUSG Gdap2     | 9.048415 | 9.551606 | 8.90071  | 8.337031 | 9.18695  | 9.017315  |
| ENSMUSG Ptgfrn    | 81.26574 | 81.55317 | 82.38438 | 55.70715 | 60.16622 | 58.321941 |
| ENSMUSG Cd2       | 18.36609 | 13.80031 | 17.01537 | 19.11544 | 20.78875 | 22.771923 |
| ENSMUSG Casq2     | 0.3178   | 2.491346 | 0.354264 | 1.080316 | 0.547076 | 0.726008  |
| ENSMUSG Vangl1    | 4.530959 | 4.241017 | 4.371409 | 3.380401 | 3.623354 | 3.559707  |
| ENSMUSG Gm32802   | 0.366058 | 0.686035 | 0.509737 | 0.398911 | 0.481911 | 0.378323  |
| Mus_musc Mus_musc | 0.158944 | 0.177008 | 0.318505 | 0.344547 | 0.072459 | 0.24219   |
| ENSMUSG Gm2381    | 0        | 0        | 0        | 0.019226 | 0        | 0         |
| ENSMUSG Gm42421   | 0.103174 | 0.038115 | 0.022557 | 0.023356 | 0.075014 | 0.076765  |
| ENSMUSG Gm26657   | 0.010782 | 0        | 0.164674 | 0        | 0        | 0         |
| ENSMUSG Brf1      | 18.20194 | 16.95885 | 17.92194 | 15.79182 | 15.7861  | 16.439522 |
| ENSMUSG Grm4      | 0.033631 | 0.035839 | 0.049614 | 0.089337 | 0.036494 | 0.104587  |
| ENSMUSG Serpina11 | 0.073359 | 0.026088 | 0        | 0.617215 | 1.365499 | 1.033006  |

|                   |          |          |          |          |          |           |
|-------------------|----------|----------|----------|----------|----------|-----------|
| ENSMUSG Olfr535   | 0        | 0        | 0        | 0        | 0        | 0         |
| ENSMUSG 1110038F1 | 21.43914 | 20.23803 | 23.91352 | 18.13252 | 17.73892 | 16.332223 |
| ENSMUSG Cfap161   | 5.682697 | 6.509075 | 2.994374 | 5.555284 | 5.722948 | 4.397683  |
| ENSMUSG Atrx      | 21.1745  | 20.93654 | 17.42587 | 22.57023 | 22.32494 | 21.666897 |
| ENSMUSG Pbdcl     | 5.230021 | 4.794065 | 5.100143 | 6.910496 | 5.999309 | 6.343583  |
| ENSMUSG Vmn2r109  | 0        | 0        | 0        | 0        | 0        | 0         |
| ENSMUSG Magee2    | 0        | 0.019988 | 0.021883 | 0        | 0.061344 | 0.080244  |
| ENSMUSG Awat2     | 0.264988 | 0.352002 | 0.299257 | 0.312685 | 0.366139 | 0.354354  |
| ENSMUSG Igbp1     | 26.52823 | 27.4946  | 29.12658 | 29.6556  | 29.82103 | 26.609148 |
| ENSMUSG Fbxw14    | 0        | 0        | 0        | 0        | 0        | 0         |
| ENSMUSG Evi2      | 4.96779  | 3.733656 | 7.086483 | 4.928428 | 7.57863  | 11.11182  |
| ENSMUSG Vmn1r28   | 0        | 0        | 0        | 0        | 0        | 0         |
| ENSMUSG Vmn1r6    | 0        | 0        | 0        | 0        | 0        | 0         |
| ENSMUSG Shtn1     | 13.80633 | 14.57998 | 12.0055  | 15.38378 | 16.66714 | 17.042755 |
| Mus_musc Mus_musc | 0        | 0        | 0        | 0        | 0        | 0         |
| ENSMUSG Cntnap2   | 0.251882 | 0.262563 | 0.209541 | 0.191795 | 0.150159 | 0.228701  |
| ENSMUSG Ccdc6     | 9.534458 | 10.42956 | 9.679016 | 9.988134 | 10.78851 | 10.782756 |
| ENSMUSG Heatr5b   | 9.996352 | 10.23813 | 9.016531 | 8.162319 | 8.625081 | 8.769765  |
| ENSMUSG Speer4b   | 0        | 0        | 0        | 0.074748 | 0        | 0         |
| ENSMUSG Prdm16    | 4.090668 | 4.655369 | 3.243133 | 2.916994 | 3.323871 | 2.82953   |
| ENSMUSG Mob1a     | 52.69691 | 52.53786 | 50.79142 | 51.16585 | 52.2834  | 51.967888 |
| ENSMUSG Lurap1l   | 24.03417 | 28.3695  | 27.54513 | 17.94614 | 18.63148 | 17.286354 |
| ENSMUSG Npas3     | 0.030896 | 0.044273 | 0        | 0.035638 | 0        | 0         |
| ENSMUSG Zc3h14    | 23.09448 | 22.47579 | 21.4043  | 20.23388 | 19.80265 | 17.490029 |
| ENSMUSG Ttc8      | 3.83201  | 4.329727 | 3.668712 | 3.684784 | 2.704327 | 3.771591  |
| ENSMUSG Polr2h    | 6.152234 | 5.190675 | 7.054064 | 6.639389 | 6.995725 | 6.596536  |
| ENSMUSG Nphp1     | 5.84775  | 6.691537 | 5.489429 | 6.779508 | 5.236551 | 6.751279  |
| ENSMUSG Zic1      | 0        | 0        | 0        | 0        | 0        | 0         |
| ENSMUSG Mall      | 5.516557 | 5.231284 | 4.599004 | 6.905821 | 6.935676 | 5.78837   |
| ENSMUSG Plscr1    | 32.91147 | 29.2974  | 31.28844 | 24.92763 | 22.52741 | 21.81668  |
| ENSMUSG Rps6kc1   | 6.361721 | 6.802674 | 6.355809 | 7.115138 | 6.94899  | 6.007189  |
| ENSMUSG Mup13     | 0        | 0        | 0        | 0        | 0        | 0         |
| ENSMUSG Tmem102   | 3.113073 | 3.418114 | 2.232964 | 2.479978 | 2.787347 | 2.870561  |
| ENSMUSG Gm4950    | 1.988935 | 0.827477 | 2.007825 | 2.364705 | 1.274221 | 1.353382  |
| ENSMUSG Prdm6     | 5.534114 | 5.060007 | 5.123748 | 3.923628 | 4.656485 | 3.589374  |
| ENSMUSG Cacna1b   | 0.12265  | 0.204346 | 0.047596 | 0.245787 | 0.082063 | 0.175503  |
| ENSMUSG Ces3b     | 0        | 0        | 0        | 0        | 0        | 0         |
| ENSMUSG Ctxn3     | 0.260174 | 0.242603 | 0.219347 | 0.101077 | 0        | 0.163352  |
| ENSMUSG Olfr395   | 0        | 0        | 0        | 0        | 0        | 0         |
| ENSMUSG Hs6st2    | 1.219892 | 1.011575 | 0.784436 | 1.432706 | 1.207128 | 1.369777  |
| ENSMUSG Asb16     | 0.014921 | 0.122328 | 0.050627 | 0.036725 | 0        | 0.075281  |
| ENSMUSG Pskh1     | 12.09952 | 11.72167 | 11.91828 | 9.741161 | 9.855062 | 10.805762 |
| ENSMUSG Adamts7   | 0.61167  | 0.585241 | 0.970669 | 0.91618  | 0.90941  | 0.805636  |
| ENSMUSG Map4k5    | 11.74905 | 12.96336 | 10.09715 | 8.467594 | 8.919463 | 8.306439  |
| ENSMUSG Glis1     | 0.051828 | 0        | 0.01744  | 0.025809 | 0.037133 | 0         |
| ENSMUSG Dusp5     | 6.664053 | 4.945821 | 5.357046 | 3.992168 | 4.125124 | 4.087847  |
| ENSMUSG Tpm1      | 157.8964 | 204.5435 | 159.1865 | 163.6284 | 142.4668 | 154.68516 |
| ENSMUSG Ube3b     | 24.08323 | 21.55737 | 23.14241 | 21.49586 | 22.55402 | 21.95581  |
| ENSMUSG Radil     | 5.771073 | 5.646926 | 5.149197 | 4.590055 | 4.501026 | 4.706326  |
| ENSMUSG Mmab      | 4.940992 | 4.745298 | 5.138384 | 5.470295 | 4.91714  | 5.958707  |
| ENSMUSG Tmem106l  | 25.05298 | 24.36842 | 21.13442 | 20.9408  | 21.05388 | 18.969421 |
| ENSMUSG Lfng      | 33.51387 | 24.36332 | 29.60135 | 21.36186 | 24.73005 | 22.909773 |
| ENSMUSG Wipi2     | 13.99489 | 11.73832 | 11.81321 | 11.16466 | 11.88675 | 11.545074 |
| ENSMUSG Ccar2     | 13.95439 | 12.76487 | 13.20985 | 11.50947 | 12.01581 | 12.634237 |
| ENSMUSG Wdr55     | 4.972336 | 7.129958 | 6.038129 | 7.568532 | 8.289877 | 8.657234  |
| ENSMUSG Dusp15    | 0        | 0        | 0.033866 | 0        | 0        | 0.015323  |
| ENSMUSG Rab8b     | 17.60319 | 16.79231 | 18.13463 | 22.4315  | 23.68482 | 23.570707 |
| ENSMUSG Kdm1a     | 13.02353 | 14.9287  | 14.37947 | 13.34181 | 13.91717 | 12.344389 |
| ENSMUSG Elac1     | 4.523062 | 5.05182  | 4.19676  | 3.478293 | 2.902426 | 2.937495  |
| ENSMUSG Tmem71    | 4.339826 | 3.881436 | 4.5978   | 4.450836 | 3.95909  | 4.702975  |
| ENSMUSG BC037034  | 7.8191   | 6.339496 | 9.50944  | 8.626403 | 9.08041  | 8.818883  |
| ENSMUSG Slc39a12  | 0.089953 | 0.201434 | 0.146517 | 0.472595 | 0.564186 | 0.374761  |
| ENSMUSG Blk       | 1.980676 | 1.327573 | 1.446997 | 4.358259 | 3.415977 | 5.259285  |
| ENSMUSG Col24a1   | 0.126776 | 0.058306 | 0.061728 | 0.795448 | 0.59889  | 0.835887  |

|                    |          |          |          |          |          |           |
|--------------------|----------|----------|----------|----------|----------|-----------|
| ENSMUSG Ddah1      | 7.971945 | 5.798568 | 8.047469 | 5.80238  | 6.084415 | 7.207608  |
| ENSMUSG Cyr61      | 173.8033 | 51.08936 | 106.6258 | 23.60173 | 25.59784 | 34.480515 |
| ENSMUSG Cryz       | 4.845941 | 5.309553 | 5.260258 | 4.146444 | 4.317304 | 4.701542  |
| ENSMUSG Tmem98     | 20.07504 | 21.66297 | 19.53132 | 19.37419 | 19.94916 | 22.240629 |
| ENSMUSG Cfp97d2    | 1.581948 | 2.176607 | 1.159322 | 1.693795 | 2.376205 | 2.006413  |
| ENSMUSG Fam149a    | 6.808757 | 6.046373 | 5.410564 | 6.069953 | 6.45752  | 6.244748  |
| ENSMUSG Fat1       | 10.94478 | 10.26923 | 8.598097 | 8.112971 | 9.174692 | 9.00614   |
| ENSMUSG Galk1      | 17.92805 | 12.34727 | 13.93068 | 14.85326 | 15.41035 | 19.607124 |
| ENSMUSG Tcea1      | 36.75761 | 39.42708 | 38.19178 | 36.91706 | 36.22162 | 34.914959 |
| ENSMUSG Mmp16      | 0.148481 | 0.235243 | 0.081201 | 0.115606 | 0.459728 | 0.190244  |
| ENSMUSG Pip4p2     | 12.50322 | 13.002   | 12.04947 | 12.47502 | 12.61861 | 11.863398 |
| ENSMUSG Calb1      | 0        | 0.054787 | 0.014485 | 0        | 0.036392 | 0         |
| ENSMUSG Decr1      | 11.77548 | 11.34483 | 9.067611 | 10.20582 | 8.70334  | 8.974302  |
| ENSMUSG Ppp1r16a   | 17.62145 | 17.58975 | 17.67021 | 20.81389 | 19.44613 | 19.693865 |
| ENSMUSG Cpne3      | 18.23455 | 18.40047 | 16.30025 | 16.41892 | 17.30205 | 15.854285 |
| ENSMUSG Rmdn1      | 7.12205  | 7.406719 | 6.578773 | 8.250461 | 6.855502 | 6.869863  |
| ENSMUSG Ehd1       | 71.00858 | 61.57009 | 75.05512 | 49.42162 | 50.47083 | 49.250542 |
| ENSMUSG Gm8947     | 0        | 0        | 0.030185 | 0        | 0        | 0         |
| ENSMUSG Gm49361    | 0        | 0        | 0        | 0        | 0        | 0.023011  |
| ENSMUSG Zfp442     | 1.05674  | 0.799852 | 0.938764 | 1.037774 | 0.88964  | 1.060694  |
| ENSMUSG Prop1      | 0        | 0        | 0        | 0        | 0        | 0         |
| ENSMUSG Zfp120     | 4.375797 | 4.5978   | 3.773361 | 4.410348 | 4.789753 | 4.347164  |
| ENSMUSG Dact1      | 4.563826 | 3.627427 | 4.409081 | 3.304939 | 4.562561 | 3.09624   |
| ENSMUSG Olfr1085   | 0        | 0        | 0        | 0        | 0        | 0         |
| ENSMUSG Olfr1087   | 0        | 0        | 0        | 0        | 0        | 0         |
| ENSMUSG Olfr1086   | 0        | 0        | 0        | 0        | 0        | 0         |
| ENSMUSG Lpin3      | 2.449043 | 2.995656 | 2.631847 | 2.363851 | 2.49396  | 2.698835  |
| ENSMUSG Olfr1097   | 0        | 0        | 0        | 0        | 0        | 0         |
| ENSMUSG Olfr1095   | 0        | 0        | 0        | 0        | 0        | 0         |
| ENSMUSG Pcsk2      | 0        | 0        | 0.008656 | 0        | 0        | 0         |
| ENSMUSG Wfdc15b    | 0        | 0        | 0        | 0        | 0        | 0         |
| ENSMUSG Pmp22      | 292.2548 | 261.5041 | 275.8613 | 169.3352 | 159.669  | 147.97245 |
| ENSMUSG Ezh1       | 18.6298  | 18.11499 | 19.26208 | 14.60651 | 14.17053 | 14.437005 |
| ENSMUSG Dppa4      | 0        | 0.0313   | 0        | 0        | 0        | 0         |
| ENSMUSG Rpl5       | 191.2774 | 199.0338 | 192.1482 | 219.3066 | 199.5667 | 206.09373 |
| ENSMUSG Olfr22-ps1 | 0        | 0        | 0        | 0        | 0        | 0         |
| ENSMUSG Gm17783    | 0        | 0        | 0        | 0        | 0        | 0         |
| ENSMUSG Plekha3    | 20.33683 | 19.02666 | 20.32301 | 15.94322 | 16.85563 | 15.670804 |
| ENSMUSG Cabp2      | 0.085801 | 0.031076 | 0.426998 | 0.144619 | 0.410753 | 0         |
| ENSMUSG Cdk2ap2    | 51.62992 | 52.76753 | 61.78902 | 64.67988 | 60.83584 | 65.756794 |
| ENSMUSG Pacs1      | 16.6706  | 13.75371 | 14.98243 | 10.63869 | 10.69773 | 10.982688 |
| ENSMUSG Pold4      | 15.74846 | 16.95393 | 18.50027 | 22.83207 | 20.09169 | 23.846348 |
| ENSMUSG Sf3b2      | 71.89864 | 66.90138 | 67.3848  | 54.50295 | 58.88422 | 57.885925 |
| ENSMUSG Pitpnm1    | 11.74552 | 11.25291 | 14.07229 | 13.71018 | 13.3217  | 15.85047  |
| ENSMUSG Grk2       | 43.65682 | 40.58703 | 50.29396 | 50.71712 | 47.60126 | 49.870285 |
| ENSMUSG Cckbr      | 0        | 0.010255 | 0        | 0        | 0        | 0         |
| ENSMUSG Ilk        | 72.99885 | 63.6861  | 64.53287 | 58.55258 | 59.59014 | 57.564522 |
| ENSMUSG Cnga4      | 0        | 0        | 0.183035 | 0        | 0        | 0.044489  |
| ENSMUSG Tpp1       | 37.99747 | 35.95844 | 33.65665 | 45.31612 | 44.97184 | 50.223572 |
| ENSMUSG Hpx        | 0.543426 | 0.805517 | 0.690167 | 0.399343 | 0.196905 | 0.478958  |
| ENSMUSG Hnrnpm     | 66.60507 | 78.4772  | 78.59976 | 59.28077 | 63.24099 | 60.632206 |
| ENSMUSG Il1rapl2   | 0        | 0        | 0        | 0        | 0        | 0         |
| ENSMUSG Lep        | 0.100045 | 0.639775 | 0.015551 | 0.084151 | 0.022284 | 0.096247  |
| ENSMUSG Vmn1r71    | 0        | 0        | 0        | 0        | 0.005381 | 0         |
| ENSMUSG Olfr1130   | 0        | 0        | 0        | 0        | 0        | 0         |
| ENSMUSG Dlst       | 37.98285 | 38.92403 | 38.99388 | 32.94933 | 36.05356 | 35.14386  |
| ENSMUSG Eif2b2     | 17.11192 | 17.6035  | 20.30399 | 17.87437 | 19.02289 | 21.387861 |
| Mus_musc Mus_musc  | 0.941392 | 1.213518 | 0.985341 | 2.237088 | 1.354655 | 1.688683  |
| Mus_musc Mus_musc  | 0        | 0.215817 | 0.183113 | 0        | 0        | 0.294955  |
| Mus_musc Mus_musc  | 0.05466  | 0.089715 | 0        | 0.259844 | 0.270993 | 0.19543   |
| Mus_musc Mus_musc  | 0.15365  | 0.451357 | 0.292471 | 0.314106 | 0.290286 | 0.208494  |
| Mus_musc Mus_musc  | 0.06039  | 0.158143 | 0.123817 | 0.123433 | 0.47126  | 0.164916  |
| Mus_musc Mus_musc  | 0        | 0        | 0        | 0.357246 | 0.084243 | 0.655229  |
| Mus_musc Mus_musc  | 0        | 0.275987 | 0        | 0        | 0        | 0         |

|                   |          |          |          |          |          |           |
|-------------------|----------|----------|----------|----------|----------|-----------|
| Mus_musc Mus_musc | 0.021257 | 0        | 0        | 0.325319 | 0        | 0         |
| ENSMUSG Gm21650   | 0        | 0        | 0        | 0        | 0        | 0         |
| ENSMUSG Gm5269    | 0        | 0        | 0        | 0        | 0        | 0         |
| ENSMUSG Efna1     | 70.87532 | 61.99916 | 59.90607 | 43.17941 | 39.53425 | 37.999437 |
| ENSMUSG Gm7102    | 0        | 0        | 0.024238 | 0        | 0        | 0.015538  |
| ENSMUSG Gm13287   | 0        | 0        | 0.099546 | 0        | 0        | 0.037743  |
| ENSMUSG Cyp4x1    | 0        | 0        | 0        | 0        | 0        | 0         |
| ENSMUSG 1700001C: | 0.124525 | 0        | 0.009467 | 0.063396 | 0.08649  | 0         |
| ENSMUSG Khnyn     | 12.71389 | 12.45302 | 13.62603 | 12.85759 | 10.93208 | 11.668982 |
| ENSMUSG Gm16181   | 0.237098 | 0        | 0        | 0.258072 | 0.073491 | 0.123664  |
| ENSMUSG Gm9603    | 0        | 0        | 0        | 0        | 0        | 0         |
| ENSMUSG Scgb2b17  | 0        | 0        | 0        | 0        | 0        | 0         |
| Mus_musc Mus_musc | 0.075062 | 0.039763 | 0.217204 | 0.150183 | 0.257232 | 0.510347  |
| Mus_musc Mus_musc | 0.217009 | 0        | 0.089675 | 0        | 0        | 0.191756  |
| Mus_musc Mus_musc | 0.774543 | 1.680445 | 1.172956 | 0.548802 | 0.265643 | 0.560739  |
| Mus_musc Mus_musc | 0        | 0        | 0        | 0        | 0        | 0         |
| Mus_musc Mus_musc | 0.839204 | 0.986439 | 0.835122 | 0.452534 | 0.286171 | 0.541331  |
| ENSMUSG Ptbp1     | 71.17163 | 63.405   | 73.43977 | 65.17779 | 65.33036 | 66.36848  |
| ENSMUSG Prl8a9    | 0        | 0        | 0        | 0        | 0        | 0         |
| ENSMUSG 1700028K( | 0        | 0        | 0        | 0        | 0.046451 | 0         |
| ENSMUSG Pdk1      | 5.660145 | 5.737051 | 4.490378 | 4.069847 | 3.40655  | 3.550496  |
| ENSMUSG Krtap19-1 | 0        | 0        | 0        | 0        | 0        | 0         |
| Mus_musc Mus_musc | 14.04822 | 13.45469 | 13.86855 | 12.76342 | 7.960555 | 10.938518 |
| Mus_musc Mus_musc | 1.127091 | 0.383366 | 0.323366 | 0.408023 | 0.241801 | 0.55646   |
| Mus_musc Mus_musc | 0.30124  | 0.333936 | 0.231784 | 0.257924 | 0.393885 | 0.18285   |
| ENSMUSG Gm3633    | 0        | 0        | 0        | 0        | 0        | 0         |
| Mus_musc Mus_musc | 3.031006 | 3.158802 | 2.407254 | 1.383658 | 2.844692 | 1.782833  |
| ENSMUSG Itpripl2  | 42.70009 | 46.16533 | 40.86397 | 27.61902 | 32.94977 | 30.068371 |
| Mus_musc Mus_musc | 0        | 0        | 0.406515 | 0.140234 | 0.218299 | 0         |
| Mus_musc Mus_musc | 0        | 0        | 0        | 0        | 0        | 0.184186  |
| ENSMUSG Olfr1123  | 0        | 0        | 0        | 0        | 0        | 0         |
| Mus_musc Mus_musc | 0        | 0        | 0        | 0        | 0        | 0.184186  |
| ENSMUSG Trim56    | 20.73271 | 21.63015 | 20.22054 | 18.01621 | 17.3456  | 16.115585 |
| Mus_musc Mus_musc | 0        | 0        | 0.168936 | 0        | 0        | 0         |
| Mus_musc Mus_musc | 0.139658 | 0.107782 | 0.144636 | 0        | 0.224392 | 0         |
| Mus_musc Mus_musc | 0        | 0.125564 | 0        | 0.245852 | 0        | 0.266437  |
| Mus_musc Mus_musc | 0        | 0        | 0        | 0        | 0.186692 | 0         |
| Mus_musc Mus_musc | 0        | 0.300916 | 0.352855 | 0.21752  | 0.066523 | 0         |
| Mus_musc Mus_musc | 0.260065 | 0.41991  | 0.134602 | 0        | 0.214898 | 0.087124  |
| ENSMUSG Upk3bl    | 0        | 0        | 0        | 0.046653 | 0        | 0         |
| Mus_musc Mus_musc | 2.898063 | 2.99479  | 2.396363 | 1.570905 | 1.521778 | 1.522599  |
| ENSMUSG Racgap1   | 2.157827 | 2.085983 | 2.757594 | 4.826549 | 5.074179 | 5.256143  |
| ENSMUSG Tas2r122  | 0        | 0        | 0        | 0        | 0        | 0         |
| Mus_musc Mus_musc | 0        | 0.186749 | 0.201252 | 0.098873 | 0        | 0.177907  |
| Mus_musc Mus_musc | 0        | 0        | 0        | 0        | 0.079331 | 0.265583  |
| Mus_musc Mus_musc | 0.214675 | 0.130051 | 0.063608 | 0        | 0.050641 | 0         |
| Mus_musc Mus_musc | 0        | 0.30875  | 0        | 0.038915 | 0        | 0         |
| Mus_musc Mus_musc | 0.088502 | 0.255836 | 0.321614 | 0.388752 | 0.652441 | 0.331156  |
| Mus_musc Mus_musc | 0        | 0        | 0        | 0        | 0        | 0         |
| ENSMUSG Faim2     | 5.385371 | 5.142561 | 5.684919 | 2.382166 | 2.241799 | 1.490009  |
| Mus_musc Mus_musc | 0        | 0        | 0        | 0.148438 | 0.466354 | 0.194838  |
| Mus_musc Mus_musc | 0        | 0        | 0        | 0.281944 | 0        | 0         |
| ENSMUSG Spata6    | 13.90277 | 12.40257 | 11.86945 | 12.25677 | 13.38446 | 13.229482 |
| ENSMUSG Pja1      | 23.34212 | 25.81326 | 24.88951 | 19.76128 | 22.09558 | 22.175678 |
| ENSMUSG Kcnh5     | 0        | 0.022816 | 0        | 0.012865 | 0        | 0         |
| Mus_musc Mus_musc | 0        | 0        | 0        | 0        | 0        | 0         |
| Mus_musc Mus_musc | 0.253964 | 0.605667 | 0.514263 | 0.628227 | 0.595072 | 1.342472  |
| ENSMUSG Taok2     | 47.72257 | 44.34284 | 43.57926 | 31.60828 | 31.04458 | 31.651842 |
| ENSMUSG Tsc2      | 20.00807 | 18.46948 | 17.68606 | 13.77368 | 14.0953  | 14.002881 |
| ENSMUSG Ncaph2    | 27.63904 | 25.4747  | 26.29409 | 24.05821 | 25.25808 | 26.139124 |
| ENSMUSG Olfr92    | 0        | 0        | 0        | 0        | 0        | 0         |
| ENSMUSG Dbndd2    | 18.10454 | 17.26383 | 15.11062 | 12.8293  | 10.14523 | 12.691185 |
| ENSMUSG Mmp9      | 4.043949 | 3.051654 | 3.759135 | 2.985734 | 1.87786  | 2.541654  |
| ENSMUSG Cyhr1     | 29.86066 | 34.29415 | 32.28151 | 31.00084 | 28.41885 | 29.429937 |

|                   |          |          |          |          |          |           |
|-------------------|----------|----------|----------|----------|----------|-----------|
| ENSMUSG Eppin     | 0        | 0        | 0        | 0        | 0        | 0         |
| Mus_musc Mus_musc | 0.079425 | 0.10295  | 0.619568 | 0        | 0.238985 | 0.155353  |
| Mus_musc Mus_musc | 0        | 0.283527 | 0.437432 | 0.832029 | 0        | 0.192045  |
| Mus_musc Mus_musc | 0.226492 | 0        | 0        | 0        | 0        | 0         |
| Mus_musc Mus_musc | 0        | 0        | 0        | 0        | 0        | 0         |
| Mus_musc Mus_musc | 0        | 0.306584 | 0        | 0        | 0        | 0         |
| Mus_musc Mus_musc | 0        | 0        | 0        | 0        | 0        | 0         |
| Mus_musc Mus_musc | 0        | 0        | 0        | 0        | 0        | 0         |
| Mus_musc Mus_musc | 0        | 0        | 0        | 0        | 0        | 0         |
| ENSMUSG Gm14409   | 0.165834 | 0.17519  | 0        | 0.085419 | 0        | 0.210499  |
| ENSMUSG Gm14412   | 0.446026 | 0.462052 | 0.205926 | 0.393748 | 0.319658 | 0.438342  |
| ENSMUSG Atf6b     | 23.92567 | 24.22063 | 28.38016 | 26.15842 | 26.76018 | 28.92753  |
| ENSMUSG Gm14326   | 5.398394 | 3.295001 | 2.705138 | 2.848216 | 3.174801 | 5.56638   |
| ENSMUSG Zfp931    | 5.600679 | 5.811973 | 6.479851 | 6.45128  | 4.763439 | 5.256232  |
| ENSMUSG Gm14418   | 2.267046 | 2.051894 | 2.422373 | 1.374578 | 0.696164 | 0.966063  |
| Mus_musc Mus_musc | 0        | 0        | 0        | 0.32458  | 0        | 0.201562  |
| ENSMUSG Notch4    | 39.20036 | 30.82887 | 35.31544 | 27.24685 | 27.96817 | 26.028924 |
| ENSMUSG Gm14322   | 1.57802  | 1.73517  | 1.361169 | 1.400384 | 1.537634 | 1.920343  |
| ENSMUSG Gm21149   | 0        | 0.266604 | 0        | 0.775176 | 0.1431   | 0.858776  |
| ENSMUSG 4930519P: | 0        | 0        | 0.064636 | 0        | 0        | 0         |
| ENSMUSG Nbl1      | 67.2186  | 65.27684 | 63.01093 | 41.9031  | 46.29481 | 48.114628 |
| ENSMUSG H2afv     | 31.99469 | 31.9355  | 34.07251 | 24.48882 | 29.98038 | 27.755214 |
| ENSMUSG Msantd4   | 15.34135 | 15.20386 | 14.21793 | 13.37804 | 13.1208  | 13.688368 |
| ENSMUSG Olfr151   | 0        | 0        | 0        | 0        | 0        | 0         |
| ENSMUSG Prox1     | 0.394479 | 0.397698 | 0.274914 | 0.524204 | 0.591881 | 0.399819  |
| Mus_musc Mus_musc | 0.135432 | 0.227847 | 0.070666 | 0.342573 | 0.202569 | 0.02528   |
| Mus_musc Mus_musc | 0.913698 | 0.643575 | 0.820578 | 0.343951 | 0.368276 | 0.40533   |
| Mus_musc Mus_musc | 0        | 0.080904 | 0        | 0.264305 | 0        | 0         |
| ENSMUSG Gm8229    | 0        | 0.034645 | 0        | 0        | 0        | 0         |
| ENSMUSG Maf       | 4.647791 | 5.1802   | 4.987141 | 6.355027 | 7.145501 | 7.072461  |
| ENSMUSG AY761184  | 0        | 0        | 0        | 0        | 0        | 0         |
| ENSMUSG Srsf11    | 36.16689 | 31.46769 | 36.28919 | 32.62816 | 32.46816 | 34.979458 |
| ENSMUSG Nap115    | 0.788937 | 0.630543 | 0.815456 | 0.321137 | 0.406234 | 0.277578  |
| ENSMUSG Pah       | 0        | 0        | 0        | 0        | 0        | 0         |
| ENSMUSG Btbd16    | 0        | 0.010066 | 0        | 0.028038 | 0.054258 | 0.114733  |
| ENSMUSG Suco      | 8.309168 | 9.143248 | 8.073128 | 7.72365  | 8.049998 | 7.517688  |
| ENSMUSG Ddx58     | 17.11637 | 13.94352 | 17.88829 | 14.98558 | 14.64639 | 14.706697 |
| ENSMUSG Hps5      | 9.400369 | 9.720139 | 9.025487 | 8.154058 | 8.050369 | 8.457189  |
| ENSMUSG Myom1     | 1.323322 | 2.270248 | 1.243097 | 1.588273 | 1.443276 | 0.918652  |
| ENSMUSG Gm35339   | 0.347662 | 0.418963 | 0.541258 | 0.34322  | 0.278351 | 0.395268  |
| ENSMUSG Siah1b    | 1.966112 | 3.023335 | 2.287014 | 1.907776 | 2.263384 | 2.155899  |
| ENSMUSG Cd53      | 25.91876 | 21.95853 | 30.72761 | 57.98429 | 54.22813 | 56.280952 |
| ENSMUSG Rnf167    | 51.15924 | 46.06643 | 44.61373 | 29.76829 | 33.37271 | 29.798089 |
| ENSMUSG Slc25a34  | 0.728886 | 0.979141 | 0.726742 | 0.704407 | 0.492567 | 0.369476  |
| ENSMUSG Olfr1454  | 0        | 0        | 0        | 0        | 0        | 0         |
| ENSMUSG Topaz1    | 0.034018 | 0.070835 | 0        | 0        | 0.136475 | 0.024168  |
| ENSMUSG Cryaa     | 0.182813 | 0.07797  | 0        | 0.12058  | 0        | 0         |
| ENSMUSG Cndp1     | 0        | 0        | 0        | 0        | 0        | 0         |
| ENSMUSG Cnot10    | 15.09991 | 14.89537 | 15.36691 | 11.97007 | 11.42223 | 12.408325 |
| ENSMUSG Olfr785   | 0        | 0        | 0        | 0        | 0        | 0         |
| ENSMUSG Ehd2      | 98.37933 | 88.71359 | 99.51709 | 59.65875 | 60.13977 | 64.315727 |
| ENSMUSG Crxos     | 0        | 0        | 0        | 0        | 0        | 0         |
| ENSMUSG Gm43518   | 0        | 0.042128 | 0        | 0        | 0        | 0         |
| ENSMUSG Flnb      | 18.39164 | 17.38904 | 17.23596 | 15.40798 | 16.5128  | 17.949177 |
| ENSMUSG Dnase1l3  | 0.477486 | 0.505837 | 0.758825 | 1.096701 | 0.885874 | 1.279351  |
| ENSMUSG Alas2     | 72.85052 | 71.7875  | 89.53293 | 26.85951 | 28.10542 | 22.129682 |
| ENSMUSG Pfkfb1    | 0.995117 | 1.234735 | 1.290339 | 1.183128 | 0.987224 | 0.711825  |
| ENSMUSG Tro       | 0.411763 | 0.399803 | 0.286169 | 0.184046 | 0.355045 | 0.167119  |
| ENSMUSG Abhd6     | 4.730364 | 4.958808 | 4.146296 | 3.543089 | 4.090049 | 3.866813  |
| ENSMUSG Gm7945    | 0        | 0        | 0        | 0        | 0        | 0         |
| ENSMUSG Gm20831   | 0        | 0        | 0        | 0        | 0        | 0         |
| ENSMUSG Gm9125    | 0        | 0        | 0        | 0        | 0        | 0         |
| ENSMUSG Olfr504   | 0        | 0        | 0        | 0        | 0        | 0         |
| ENSMUSG Ythdf3    | 19.7148  | 21.85467 | 19.59338 | 20.67552 | 19.68332 | 20.459246 |

|                   |          |          |          |          |          |           |
|-------------------|----------|----------|----------|----------|----------|-----------|
| ENSMUSG Cdh19     | 0.146188 | 0.38053  | 0.100589 | 0.075938 | 0.139709 | 0.081599  |
| ENSMUSG Rpl9      | 267.4874 | 284.9671 | 262.4239 | 270.4201 | 257.2886 | 260.67402 |
| ENSMUSG Defb41    | 0        | 0        | 0        | 0        | 0        | 0         |
| ENSMUSG Lrch1     | 19.70441 | 19.02934 | 17.88705 | 13.15041 | 14.28268 | 13.115475 |
| ENSMUSG Gm14685   | 0.507465 | 0.301041 | 0.425785 | 0.073489 | 0.090381 | 0.069906  |
| ENSMUSG Sycp3     | 0.102493 | 0.287767 | 0.137729 | 0.19902  | 0.061542 | 0.1888    |
| ENSMUSG Dspp      | 0.012561 | 0        | 0        | 0.010761 | 0.01264  | 0         |
| ENSMUSG Olfr643   | 0        | 0        | 0        | 0        | 0        | 0         |
| ENSMUSG Dok1      | 11.37297 | 11.40698 | 11.92719 | 12.40898 | 12.86609 | 14.054706 |
| ENSMUSG Zfp648    | 0        | 0        | 0        | 0        | 0        | 0         |
| ENSMUSG Zbtb6     | 6.349748 | 6.147703 | 5.704438 | 4.88726  | 5.016484 | 4.93882   |
| ENSMUSG Gm45337   | 0        | 0        | 0        | 0        | 0        | 0         |
| ENSMUSG Lrmda     | 3.484457 | 4.023402 | 2.355575 | 3.472879 | 3.657908 | 3.883925  |
| ENSMUSG Syne2     | 18.76181 | 19.17959 | 15.40395 | 12.84343 | 13.06119 | 13.29975  |
| ENSMUSG Rps15     | 672.94   | 708.605  | 745.297  | 749.7103 | 664.5001 | 751.62684 |
| ENSMUSG D630045J1 | 2.224305 | 1.856495 | 1.84696  | 1.4448   | 1.638    | 1.394878  |
| ENSMUSG Iglc2     | 7.031631 | 6.115587 | 5.595245 | 825.5218 | 111.9134 | 228.07881 |
| ENSMUSG Daxx      | 13.26724 | 11.62071 | 15.21221 | 11.29392 | 11.05095 | 11.794047 |
| ENSMUSG Gm29133   | 0        | 0        | 0        | 0        | 0        | 0         |
| ENSMUSG Gm28372   | 0        | 0.023278 | 0.034132 | 0        | 0        | 0.058038  |
| ENSMUSG Gm29666   | 0.007018 | 0.058111 | 0.031042 | 0.053632 | 0.036303 | 0.029949  |
| ENSMUSG Gprc6a    | 2.26438  | 1.297734 | 1.979817 | 0.656572 | 1.128381 | 0.565747  |
| ENSMUSG Ppp1r12a  | 35.06214 | 36.59604 | 31.39005 | 30.48679 | 29.74072 | 29.464059 |
| ENSMUSG Lin7a     | 0.037161 | 0.016652 | 0        | 0.055232 | 0        | 0.021123  |
| ENSMUSG Rfx6      | 0        | 0        | 0        | 0        | 0        | 0         |
| ENSMUSG Fam162b   | 12.24547 | 10.57464 | 14.55361 | 6.020663 | 5.903498 | 4.257097  |
| ENSMUSG Hnrnpab   | 91.23426 | 89.18505 | 90.82186 | 85.32311 | 90.43859 | 92.118432 |
| ENSMUSG Phykpl    | 2.500633 | 2.38286  | 2.568001 | 1.995366 | 1.695055 | 2.192597  |
| ENSMUSG Prtg      | 0.008366 | 0.026921 | 0.027165 | 0.005707 | 0.006122 | 0         |
| ENSMUSG Izumo1    | 0.233622 | 0.196582 | 0.20209  | 0.233809 | 0.096285 | 0.291885  |
| ENSMUSG Prol1     | 0        | 0        | 0        | 0        | 0        | 0         |
| ENSMUSG Erich6    | 0        | 0        | 0.007312 | 0.121692 | 0        | 0.038432  |
| ENSMUSG Cldn3     | 105.2201 | 108.0689 | 85.15282 | 83.09777 | 81.08869 | 94.44278  |
| ENSMUSG Pcdha6    | 0        | 0        | 0        | 0.015099 | 0        | 0         |
| ENSMUSG Fam217b   | 2.86838  | 2.756465 | 2.927532 | 1.969188 | 2.492164 | 2.098206  |
| ENSMUSG Flt4      | 17.94866 | 14.11951 | 12.52157 | 9.730566 | 10.70941 | 8.658182  |
| ENSMUSG Usp21     | 10.80016 | 12.44044 | 12.28789 | 11.52817 | 11.61826 | 10.708035 |
| ENSMUSG H1f0      | 66.69609 | 53.27101 | 49.26738 | 61.70841 | 60.86301 | 61.758499 |
| ENSMUSG Stpg3     | 0        | 0        | 0        | 0        | 0        | 0         |
| ENSMUSG Decr2     | 6.276742 | 5.747447 | 5.707756 | 5.612251 | 5.761088 | 6.07962   |
| ENSMUSG Smim22    | 3.697818 | 5.271574 | 6.278191 | 8.374179 | 4.915992 | 8.070028  |
| ENSMUSG Anln      | 1.232212 | 1.667621 | 1.204239 | 1.552201 | 2.43736  | 2.785     |
| ENSMUSG Krtap4-13 | 0        | 0        | 0        | 0        | 0        | 0         |
| ENSMUSG Tent4b    | 13.29659 | 15.84961 | 15.28629 | 11.37377 | 11.78164 | 11.70329  |
| ENSMUSG Olfr148   | 0        | 0        | 0        | 0        | 0        | 0         |
| ENSMUSG Prr14l    | 5.276136 | 5.33312  | 4.921778 | 5.876408 | 5.541746 | 5.626851  |
| ENSMUSG Arhgap39  | 4.497038 | 5.117772 | 4.906704 | 5.785936 | 5.446682 | 6.208939  |
| ENSMUSG Fancm     | 1.369016 | 1.377662 | 1.274639 | 1.513904 | 1.619104 | 1.497586  |
| ENSMUSG Abhd16b   | 0.01589  | 0.102931 | 0.067289 | 0.130194 | 0.093819 | 0         |
| ENSMUSG Olfr171   | 0        | 0.008012 | 0.041327 | 0.008911 | 0.059267 | 0.01834   |
| ENSMUSG Sms       | 7.425016 | 8.978188 | 8.346001 | 7.205543 | 6.97929  | 8.561111  |
| ENSMUSG Trip12    | 30.71258 | 27.63617 | 27.83087 | 31.23132 | 37.04427 | 31.601555 |
| ENSMUSG Samd5     | 1.705052 | 1.791078 | 1.812855 | 1.572552 | 1.614733 | 1.272825  |
| ENSMUSG Stk11ip   | 5.521388 | 4.767936 | 5.406628 | 6.414948 | 5.849578 | 6.894168  |
| ENSMUSG Hsd3b3    | 0        | 0        | 0        | 0.246937 | 0        | 0         |
| ENSMUSG Obsl1     | 2.618174 | 2.896213 | 2.555953 | 3.127788 | 2.879597 | 2.761106  |
| ENSMUSG Grm2      | 0        | 0        | 0        | 0        | 0        | 0         |
| ENSMUSG P3h3      | 7.351187 | 7.391277 | 8.73704  | 6.637984 | 7.082104 | 7.791071  |
| ENSMUSG Gm26661   | 0        | 0.067817 | 0        | 0.055419 | 0.047961 | 0.082903  |
| ENSMUSG Mre11a    | 3.632282 | 3.409601 | 3.96428  | 4.357398 | 3.425417 | 4.099735  |
| ENSMUSG Terf2     | 10.57997 | 10.17239 | 10.83246 | 7.967277 | 8.619058 | 8.243341  |
| ENSMUSG Cep57     | 8.975621 | 9.437144 | 8.63212  | 9.909898 | 8.714958 | 8.172067  |
| ENSMUSG Maml2     | 5.782131 | 6.041622 | 5.124327 | 6.035146 | 5.867781 | 5.208551  |
| ENSMUSG Cyb5b     | 44.07185 | 48.19143 | 42.72775 | 48.52938 | 48.43161 | 51.358322 |

|                   |          |          |          |          |          |           |
|-------------------|----------|----------|----------|----------|----------|-----------|
| ENSMUSG 1700012Bc | 2.741761 | 2.023515 | 1.139828 | 1.104547 | 0.787201 | 1.084504  |
| ENSMUSG Creb3l2   | 17.75706 | 16.62345 | 16.25108 | 16.57288 | 17.96098 | 16.305893 |
| ENSMUSG Ctss      | 125.9906 | 123.3505 | 156.3988 | 561.0735 | 490.6992 | 604.32745 |
| ENSMUSG Akr1d1    | 0        | 0        | 0        | 0        | 0        | 0         |
| ENSMUSG Ramac     | 27.68238 | 29.638   | 29.84015 | 28.50162 | 25.67438 | 23.790505 |
| ENSMUSG Pold1     | 6.478075 | 6.413057 | 7.690556 | 6.520115 | 6.658541 | 6.914237  |
| ENSMUSG Rad51ap1  | 3.729486 | 3.321038 | 2.881627 | 3.327152 | 3.002468 | 3.483681  |
| ENSMUSG D6Wsu16c  | 6.163644 | 6.210503 | 5.388804 | 6.579359 | 5.9639   | 7.043264  |
| ENSMUSG Akap3     | 0        | 0        | 0        | 0        | 0.049715 | 0.031778  |
| ENSMUSG Dyrk4     | 0        | 0.322199 | 0        | 0.391023 | 0.212764 | 0.248553  |
| ENSMUSG Cd9       | 310.3044 | 304.4887 | 308.9958 | 239.5251 | 263.7409 | 259.94327 |
| ENSMUSG Scnn1a    | 209.4609 | 192.0043 | 173.0134 | 115.5114 | 121.8274 | 107.69784 |
| ENSMUSG Tnfrsf1a  | 65.22896 | 63.88139 | 79.06608 | 59.20845 | 61.07843 | 57.993487 |
| ENSMUSG Ly6g6d    | 1.828963 | 2.22959  | 2.579999 | 2.745721 | 2.296002 | 1.946459  |
| ENSMUSG Lst1      | 3.085755 | 3.324169 | 7.250754 | 4.441531 | 2.873089 | 2.160449  |
| ENSMUSG H2-D1     | 582.0484 | 517.5391 | 1112.88  | 885.3315 | 668.2918 | 824.89987 |
| ENSMUSG Mpig6b    | 0.9553   | 0.498522 | 0.91348  | 0.525259 | 0.238733 | 0.197021  |
| ENSMUSG C4b       | 39.23544 | 45.39443 | 39.05504 | 45.34529 | 44.03903 | 51.806937 |
| ENSMUSG Tnpo2     | 13.55512 | 13.70801 | 14.64835 | 14.34294 | 14.60717 | 14.323037 |
| ENSMUSG Orc6      | 6.31519  | 6.443124 | 8.13705  | 5.98481  | 5.420904 | 5.663844  |
| ENSMUSG Vps35     | 42.78085 | 43.18386 | 39.49628 | 38.22437 | 39.75346 | 39.476017 |
| ENSMUSG Mylk3     | 1.191154 | 2.548362 | 1.407935 | 1.23967  | 0.770707 | 0.72132   |
| ENSMUSG Fam166a   | 0        | 0        | 0        | 0        | 0        | 0.034192  |
| ENSMUSG Anapc2    | 30.73926 | 30.02154 | 31.26527 | 26.40501 | 25.73026 | 26.990122 |
| ENSMUSG Ssna1     | 25.28914 | 24.50796 | 26.3952  | 24.24255 | 24.59899 | 26.782005 |
| ENSMUSG Lrrc26    | 6.387699 | 9.766609 | 6.275339 | 10.69936 | 8.600243 | 10.39151  |
| ENSMUSG Arl6ip6   | 8.229794 | 7.618213 | 8.122505 | 7.921731 | 7.72795  | 8.30779   |
| ENSMUSG Tmem210   | 0.096589 | 0        | 0        | 0        | 0        | 0         |
| ENSMUSG Uchl4     | 0.218291 | 0.346732 | 0.224909 | 0.244851 | 0.376277 | 0.458881  |
| Mus_musc Mus_musc | 0.188031 | 0        | 0        | 0.061264 | 0        | 0         |
| ENSMUSG Dmrtc2    | 0        | 0        | 0        | 0        | 0        | 0         |
| ENSMUSG Synpo     | 12.85491 | 12.3569  | 10.54633 | 8.683373 | 8.874948 | 10.69476  |
| ENSMUSG Usp17le   | 0        | 0        | 0        | 0        | 0        | 0         |
| ENSMUSG Ctnnd2    | 2.007232 | 2.098804 | 2.229116 | 1.60476  | 1.781149 | 1.83116   |
| ENSMUSG Tars      | 11.0208  | 9.768097 | 10.49474 | 10.57694 | 11.20998 | 10.943196 |
| ENSMUSG Slc45a2   | 0        | 0        | 0        | 0        | 0        | 0         |
| ENSMUSG Amacr     | 4.088607 | 4.026052 | 4.1155   | 3.20056  | 4.483079 | 3.465661  |
| ENSMUSG Skor1     | 0.012391 | 0        | 0        | 0        | 0        | 0         |
| ENSMUSG Zfp326    | 11.44703 | 12.18945 | 11.8901  | 9.776918 | 8.455857 | 10.098452 |
| ENSMUSG Brix1     | 9.276756 | 9.303609 | 8.673007 | 7.893044 | 7.730146 | 8.151088  |
| ENSMUSG Rad1      | 5.920601 | 7.097038 | 7.679993 | 7.030172 | 6.111747 | 6.345861  |
| ENSMUSG Ttc23l    | 0        | 0        | 0        | 0        | 0        | 0         |
| ENSMUSG Gbp9      | 18.75587 | 16.02661 | 49.27314 | 35.75069 | 14.01772 | 17.538683 |
| ENSMUSG Abcg3     | 0.833135 | 0.478123 | 1.039979 | 1.24605  | 0.794727 | 0.734488  |
| ENSMUSG Olfr1140  | 0        | 0        | 0        | 0        | 0        | 0         |
| ENSMUSG Olfr152   | 0        | 0        | 0        | 0        | 0        | 0         |
| ENSMUSG Olfr1143  | 0        | 0        | 0        | 0        | 0        | 0         |
| ENSMUSG Olfr1145  | 0        | 0        | 0        | 0        | 0        | 0         |
| ENSMUSG Olfr1131  | 0        | 0        | 0        | 0        | 0        | 0         |
| ENSMUSG Olfr1132  | 0        | 0        | 0        | 0        | 0        | 0         |
| ENSMUSG Gm3327    | 0        | 0        | 0        | 0        | 0        | 0         |
| ENSMUSG Pcdhga12  | 1.23564  | 1.262063 | 1.229754 | 0.934652 | 0.641633 | 0.574178  |
| ENSMUSG Mlec      | 35.10268 | 38.84552 | 38.62889 | 51.74925 | 56.1801  | 58.080029 |
| ENSMUSG Tmem252   | 24.18839 | 24.82787 | 35.98645 | 10.8752  | 16.62169 | 13.581041 |
| ENSMUSG Cypt3     | 0        | 0        | 0        | 0        | 0        | 0         |
| ENSMUSG lqschfp   | 0        | 0        | 0        | 0        | 0        | 0         |
| ENSMUSG Nipsnap2  | 29.41962 | 30.97433 | 24.79234 | 28.68997 | 28.95849 | 28.58202  |
| ENSMUSG Diablo    | 10.71969 | 14.06785 | 11.71175 | 10.91871 | 10.54335 | 11.406713 |
| ENSMUSG Ran       | 39.79347 | 42.05964 | 43.71227 | 43.37862 | 42.81566 | 49.339245 |
| ENSMUSG B3gnt4    | 0.088951 | 0.109744 | 0.086954 | 0.050476 | 0.047175 | 0.025085  |
| ENSMUSG Mmp17     | 0.536337 | 0.526795 | 0.642757 | 1.048947 | 0.783631 | 0.873264  |
| ENSMUSG Il31      | 0        | 0        | 0        | 0        | 0        | 0         |
| ENSMUSG Vps33a    | 13.63028 | 14.34262 | 13.42532 | 12.60723 | 13.65497 | 13.245343 |
| ENSMUSG Bcl7a     | 7.815838 | 7.588841 | 6.900502 | 5.104377 | 5.498835 | 4.800509  |

|                   |          |          |          |          |          |           |
|-------------------|----------|----------|----------|----------|----------|-----------|
| ENSMUSG Sfswap    | 14.17739 | 14.13891 | 13.88458 | 11.87639 | 12.09338 | 11.431142 |
| ENSMUSG Chrna5    | 0        | 0        | 0        | 0        | 0        | 0         |
| ENSMUSG 1600002K  | 3.370144 | 4.423532 | 5.168749 | 6.703343 | 4.849871 | 7.121325  |
| ENSMUSG Mboat7    | 16.88381 | 17.06684 | 15.67759 | 17.27974 | 18.30232 | 19.433022 |
| ENSMUSG Prpf39    | 9.255119 | 9.830883 | 10.96215 | 8.640506 | 7.242775 | 7.251646  |
| ENSMUSG Krt33a    | 0        | 0        | 0        | 0        | 0        | 0         |
| ENSMUSG Igsf3     | 2.018219 | 2.306005 | 1.846997 | 2.414755 | 2.571637 | 2.625412  |
| ENSMUSG Lce3b     | 0        | 0        | 0        | 0        | 0        | 0         |
| ENSMUSG Arhgef26  | 30.96391 | 31.67769 | 27.92905 | 16.15149 | 16.71594 | 14.437682 |
| ENSMUSG Mat2b     | 38.13693 | 44.20118 | 42.27033 | 40.10176 | 37.00626 | 35.219298 |
| ENSMUSG Ak4       | 1.458588 | 1.305344 | 1.242382 | 0.900204 | 0.757217 | 0.653685  |
| ENSMUSG Rab40c    | 9.929743 | 10.45847 | 10.89438 | 9.04831  | 8.211466 | 8.72166   |
| ENSMUSG Rhot2     | 12.19601 | 11.1871  | 12.61896 | 11.6179  | 12.26638 | 11.698478 |
| ENSMUSG Sgjp1     | 6.063465 | 3.883368 | 4.632699 | 2.949118 | 2.798344 | 2.477596  |
| ENSMUSG Rhbd1     | 0.847264 | 1.477177 | 1.440245 | 1.292412 | 1.21705  | 0.843758  |
| ENSMUSG Mier1     | 23.88011 | 27.58655 | 23.70044 | 20.5401  | 19.85246 | 19.364218 |
| ENSMUSG Slc35d1   | 3.705956 | 3.635738 | 3.400527 | 3.222141 | 3.636393 | 3.132946  |
| ENSMUSG 4921539E1 | 0        | 0        | 0        | 0        | 0        | 0         |
| ENSMUSG Gng13     | 0        | 0        | 0        | 0        | 0        | 0.050859  |
| ENSMUSG Fbxl16    | 1.371797 | 1.221843 | 1.488076 | 1.04384  | 1.283769 | 1.388864  |
| ENSMUSG Dnajc6    | 1.002248 | 0.780183 | 0.752112 | 0.425068 | 0.500075 | 0.688151  |
| ENSMUSG Colgalt2  | 5.518409 | 5.57434  | 4.730312 | 3.519923 | 3.087159 | 2.97542   |
| ENSMUSG Pygm      | 6.716689 | 8.849003 | 7.447826 | 5.697334 | 4.559574 | 4.918651  |
| ENSMUSG Irx4      | 0        | 0        | 0        | 0        | 0        | 0         |
| ENSMUSG Mrpl36    | 19.97564 | 19.10934 | 20.42981 | 25.14593 | 21.61146 | 24.848432 |
| ENSMUSG Ndufs6    | 23.21147 | 26.95454 | 26.82664 | 30.19379 | 26.08186 | 26.283409 |
| ENSMUSG Gpr19     | 1.395967 | 1.214714 | 1.114224 | 1.638686 | 0.829392 | 1.302203  |
| ENSMUSG Chsy1     | 13.27364 | 13.71453 | 15.79729 | 13.26209 | 13.37213 | 15.393225 |
| ENSMUSG Fhl3      | 2.254087 | 1.646305 | 2.023173 | 2.800991 | 3.110972 | 3.717651  |
| ENSMUSG 1700024P  | 0        | 0        | 0        | 0        | 0        | 0         |
| ENSMUSG Prss22    | 0.214163 | 0.056759 | 0        | 0.026812 | 0.105896 | 0.078599  |
| ENSMUSG Abhd8     | 16.92122 | 17.62082 | 18.42711 | 20.22881 | 17.90728 | 18.381937 |
| ENSMUSG Olfr1312  | 0        | 0        | 0        | 0        | 0        | 0         |
| ENSMUSG Gm47996   | 0        | 0        | 0        | 0        | 0        | 0         |
| ENSMUSG Il4i1     | 0.085457 | 0.089828 | 0.026065 | 1.257309 | 1.838877 | 1.704217  |
| ENSMUSG Kcnk1     | 7.774706 | 10.59062 | 8.856638 | 9.237793 | 9.933748 | 10.991684 |
| ENSMUSG Ttc37     | 5.613985 | 5.036852 | 5.097846 | 5.438575 | 5.531474 | 6.045093  |
| ENSMUSG Cd44      | 45.43508 | 44.4591  | 42.23131 | 60.83589 | 66.78862 | 69.527614 |
| ENSMUSG Slc1a2    | 0.367606 | 0.514657 | 0.452376 | 0.635673 | 0.551909 | 0.546991  |
| ENSMUSG Hoxc8     | 0        | 0        | 0        | 0        | 0        | 0         |
| ENSMUSG Efcab8    | 0        | 0        | 0        | 0        | 0        | 0         |
| ENSMUSG S100a1    | 85.50056 | 83.41662 | 77.66231 | 117.759  | 98.48042 | 115.72649 |
| ENSMUSG Lmod3     | 0        | 0.507305 | 0.075507 | 0.056879 | 0.025286 | 0.024946  |
| ENSMUSG Spem2     | 0        | 0        | 0        | 0        | 0        | 0         |
| ENSMUSG Rps6ka4   | 22.42555 | 20.60279 | 22.07073 | 17.34678 | 19.14941 | 18.513597 |
| ENSMUSG Prdx5     | 56.25512 | 66.94559 | 72.78378 | 79.56921 | 69.52989 | 77.213152 |
| ENSMUSG Kcnk4     | 0.034414 | 0        | 0.057262 | 0.047623 | 0        | 0         |
| ENSMUSG Esrra     | 12.29003 | 12.65275 | 12.07614 | 15.39136 | 14.43408 | 15.766828 |
| ENSMUSG Gpr137    | 10.20955 | 10.86886 | 11.90718 | 12.91187 | 12.05522 | 11.304406 |
| ENSMUSG Bad       | 18.83569 | 22.50847 | 23.90184 | 25.81548 | 20.09501 | 23.629777 |
| ENSMUSG Olfr314   | 0        | 0        | 0        | 0        | 0        | 0         |
| ENSMUSG Olfr248   | 0        | 0        | 0        | 0        | 0        | 0         |
| ENSMUSG Fam229b   | 1.263201 | 1.352351 | 0.818202 | 1.70364  | 1.137756 | 1.613967  |
| ENSMUSG Olfr479   | 0        | 0        | 0        | 0        | 0        | 0         |
| ENSMUSG Acss2     | 13.06208 | 15.60348 | 13.0979  | 13.2232  | 11.90476 | 15.940405 |
| ENSMUSG Rin1      | 6.357058 | 5.756944 | 8.072344 | 8.917563 | 8.188897 | 8.941204  |
| ENSMUSG Clrn1     | 0        | 0        | 0        | 0        | 0        | 0.087284  |
| ENSMUSG Map1lc3a  | 40.59729 | 36.59197 | 34.90339 | 31.53746 | 31.08344 | 30.514128 |
| ENSMUSG Mettl5    | 3.999151 | 5.07361  | 4.887918 | 5.080979 | 4.629006 | 5.672896  |
| Mus_musc Mus_musc | 0.516652 | 0.582653 | 0.464788 | 0.483632 | 0.425414 | 0.125094  |
| Mus_musc Mus_musc | 1.265854 | 0.270435 | 0.425788 | 0.374667 | 0.392435 | 0.574642  |
| Mus_musc Mus_musc | 0        | 0.333372 | 0        | 0        | 0        | 0         |
| ENSMUSG Zfp592    | 10.63615 | 10.59113 | 9.310947 | 7.857794 | 8.015745 | 8.139545  |
| Mus_musc Mus_musc | 0        | 0        | 0        | 0        | 0        | 0         |



|                    |          |          |          |          |          |           |
|--------------------|----------|----------|----------|----------|----------|-----------|
| ENSMUSG Psm�4      | 60.14197 | 56.73078 | 65.12309 | 55.05692 | 54.22314 | 54.836332 |
| Mus_musc Mus_musc  | 0.450666 | 0.121982 | 0.249157 | 0        | 0.387833 | 0.127593  |
| ENSMUSG Tmod4      | 1.518094 | 2.610623 | 3.365944 | 1.891597 | 1.774119 | 1.377237  |
| ENSMUSG Fjx1       | 2.077286 | 1.449394 | 1.788815 | 1.960375 | 1.887714 | 1.814652  |
| ENSMUSG Snx16      | 2.683016 | 2.983629 | 2.906005 | 2.621547 | 2.287123 | 2.651275  |
| ENSMUSG 9-Mar      | 2.557648 | 2.458638 | 2.758938 | 2.970479 | 2.863957 | 2.660425  |
| ENSMUSG Ambra1     | 9.178536 | 8.246212 | 8.27237  | 7.910268 | 7.658894 | 8.843568  |
| ENSMUSG Abcg5      | 0.021834 | 0.016606 | 0        | 0        | 0.141803 | 0.060168  |
| ENSMUSG Gm4847     | 0        | 0        | 0        | 0        | 0        | 0         |
| Mus_musc Mus_musc  | 0.148025 | 0        | 0.370799 | 0.595793 | 0        | 0.267101  |
| ENSMUSG Tefm       | 3.963259 | 4.11142  | 3.324331 | 3.430629 | 4.42224  | 3.005439  |
| ENSMUSG Ltb4r1     | 2.357275 | 1.615296 | 2.339173 | 2.99173  | 2.27687  | 3.982863  |
| ENSMUSG Dcaf8      | 40.06914 | 39.33917 | 34.66708 | 34.65112 | 33.14301 | 35.36879  |
| ENSMUSG Vangl2     | 3.082858 | 2.862879 | 2.829714 | 1.735292 | 2.292686 | 2.276695  |
| ENSMUSG Copa       | 52.51586 | 48.66632 | 49.43806 | 46.79637 | 53.94008 | 54.409057 |
| ENSMUSG Uck2       | 5.976129 | 5.310803 | 5.866226 | 5.162994 | 5.702305 | 5.857131  |
| ENSMUSG Rbm4       | 7.62886  | 8.253481 | 9.363962 | 7.679338 | 9.200852 | 8.306576  |
| ENSMUSG Taz        | 22.44073 | 20.54846 | 23.34257 | 20.87916 | 18.02459 | 19.843525 |
| ENSMUSG Sh3pxd2b   | 3.912185 | 4.45766  | 3.522135 | 8.06918  | 10.08613 | 10.235717 |
| ENSMUSG Gm45015    | 0        | 0        | 0        | 0        | 0        | 0         |
| ENSMUSG Gm2007     | 0.658845 | 0.939133 | 0.989679 | 0.663928 | 0.610471 | 1.383994  |
| ENSMUSG Gm4141     | 0        | 0        | 0        | 0        | 0        | 0         |
| Mus_musc Mus_musc  | 0        | 0.133617 | 0.27213  | 0.550004 | 0.297193 | 0.274536  |
| ENSMUSG Klc3       | 4.828499 | 6.183413 | 3.929231 | 4.316067 | 4.354771 | 2.813807  |
| Mus_musc Mus_musc  | 0        | 0.10991  | 0        | 0.289127 | 0        | 0.079234  |
| ENSMUSG Birc2      | 14.45519 | 14.33687 | 14.37974 | 17.50373 | 17.86777 | 13.806566 |
| ENSMUSG Ciao1      | 15.24825 | 14.78206 | 14.83141 | 12.14401 | 12.29683 | 11.002029 |
| Mus_musc Mus_musc  | 0        | 0.154309 | 0        | 0        | 0        | 0         |
| ENSMUSG Snrnp200   | 25.09653 | 23.03118 | 22.90476 | 19.52572 | 21.59258 | 21.833952 |
| ENSMUSG Uxs1       | 4.813806 | 5.227561 | 5.387769 | 6.112526 | 5.426503 | 5.864484  |
| ENSMUSG Has1       | 7.114544 | 5.394232 | 2.209636 | 0.637007 | 0.355562 | 1.120239  |
| ENSMUSG Sec22c     | 3.756793 | 3.624448 | 3.349639 | 3.284195 | 3.610669 | 3.371423  |
| ENSMUSG C1qtnf7    | 7.914645 | 6.783221 | 6.431625 | 5.559064 | 5.029057 | 4.309538  |
| ENSMUSG Cep128     | 2.284199 | 2.450603 | 2.257303 | 3.088452 | 3.471108 | 3.490604  |
| ENSMUSG Tmem236    | 0        | 0.02387  | 0.027702 | 0.042803 | 0.0399   | 0.015101  |
| Mus_musc Mus_musc  | 0.04793  | 0.058295 | 0.106849 | 0.255224 | 0.426385 | 0.307607  |
| Mus_musc Mus_musc  | 0.374166 | 0.272758 | 0.467571 | 0        | 0.173123 | 0         |
| Mus_musc Mus_musc  | 0        | 0        | 0.168936 | 0        | 0        | 0.114639  |
| ENSMUSG Rnls       | 3.634531 | 3.254389 | 2.848617 | 2.820085 | 2.332414 | 3.097889  |
| ENSMUSG Olfr588-ps | 0        | 0        | 0        | 0        | 0        | 0         |
| ENSMUSG Trappc6a   | 17.41728 | 18.15914 | 18.6731  | 19.9611  | 15.71909 | 18.102404 |
| ENSMUSG Zfp830     | 12.10753 | 11.26283 | 12.70695 | 11.05183 | 11.65589 | 9.790582  |
| ENSMUSG Olfr1364   | 0        | 0        | 0        | 0        | 0        | 0         |
| Mus_musc Mus_musc  | 0        | 0        | 0        | 0        | 0.054305 | 0         |
| Mus_musc Mus_musc  | 0.310025 | 0.079195 | 0.039181 | 0.141933 | 0.522801 | 0.780678  |
| ENSMUSG Eef1a2     | 0.560305 | 4.547533 | 0.942768 | 2.65408  | 2.547132 | 3.099084  |
| ENSMUSG Tbc1d22b   | 6.952634 | 7.570584 | 8.34097  | 8.042716 | 7.241466 | 7.882142  |
| Mus_musc Mus_musc  | 0.146073 | 0.165109 | 0.239549 | 0.280657 | 0.163531 | 0.166396  |
| ENSMUSG Kcnq2      | 0        | 0        | 0        | 0        | 0        | 0         |
| ENSMUSG Cdrt4      | 0        | 0.203825 | 0        | 0.269569 | 0        | 0         |
| ENSMUSG Ppdpf      | 33.88485 | 34.74055 | 31.03163 | 33.76389 | 32.79014 | 30.099986 |
| Mus_musc Mus_musc  | 0        | 0.287423 | 0.154779 | 0.135346 | 0.186165 | 0.450406  |
| ENSMUSG Zpld1      | 0.250569 | 0.181544 | 0.271851 | 0.172274 | 0.063961 | 0.175855  |
| ENSMUSG Ctsf       | 13.0812  | 14.30778 | 12.83359 | 11.49673 | 13.07068 | 12.788013 |
| Mus_musc Mus_musc  | 0        | 0        | 0.146195 | 0        | 0        | 0         |
| Mus_musc Mus_musc  | 0        | 0.209945 | 0.387289 | 0        | 0        | 0         |
| Mus_musc Mus_musc  | 0.325877 | 0.209635 | 0.232062 | 0.300193 | 0.392154 | 0.35641   |
| Mus_musc Mus_musc  | 0.131968 | 0.0986   | 0.176744 | 0.263798 | 0.570391 | 0.213525  |
| Mus_musc Mus_musc  | 1.049351 | 1.060969 | 1.760374 | 0.646038 | 1.089154 | 0.757952  |
| Mus_musc Mus_musc  | 36.09096 | 37.13228 | 29.98489 | 28.91544 | 29.11249 | 26.67324  |
| ENSMUSG Olfr772    | 0        | 0        | 0        | 0        | 0        | 0         |
| Mus_musc Mus_musc  | 0        | 0.429985 | 0        | 0        | 0        | 0         |
| Mus_musc Mus_musc  | 0        | 0        | 0        | 0.404833 | 0.211375 | 0.582314  |
| Mus_musc Mus_musc  | 0        | 0        | 0        | 0.235865 | 0        | 0         |

|                   |          |          |          |          |          |           |
|-------------------|----------|----------|----------|----------|----------|-----------|
| Mus_musc Mus_musc | 0        | 0.073226 | 0.255297 | 0        | 0        | 0         |
| ENSMUSG Actl10    | 0        | 0.061683 | 0.033314 | 0.03478  | 0        | 0.055219  |
| Mus_musc Mus_musc | 0.086313 | 0        | 0.091389 | 0        | 0.150413 | 0         |
| ENSMUSG Ssty2     | 0        | 0        | 0        | 0        | 0        | 0         |
| ENSMUSG Olfr476   | 0        | 0        | 0        | 0        | 0        | 0         |
| ENSMUSG Gm906     | 0.006294 | 0.0047   | 0.016079 | 0.016563 | 0.013504 | 0         |
| ENSMUSG Fam170b   | 0.024309 | 0.040991 | 0.029918 | 0.061635 | 0.105469 | 0.074914  |
| Mus_musc Mus_musc | 1.189866 | 1.358554 | 0.949737 | 0.314141 | 0.766332 | 0.596612  |
| ENSMUSG Plac9a    | 4.468578 | 3.739639 | 3.189083 | 2.973795 | 2.607392 | 0.85734   |
| ENSMUSG Olfr1186  | 0        | 0        | 0        | 0        | 0        | 0         |
| ENSMUSG Xndc1     | 4.232826 | 4.430805 | 4.398519 | 3.882593 | 3.237314 | 3.506254  |
| ENSMUSG Pvrig     | 0.070686 | 0.362198 | 1.003137 | 1.243732 | 0.578055 | 0.965105  |
| ENSMUSG Olfr1228  | 0        | 0        | 0        | 0        | 0        | 0         |
| ENSMUSG Crlf3     | 26.77435 | 23.30352 | 27.27091 | 22.24024 | 19.95022 | 22.687273 |
| ENSMUSG Trim61    | 0        | 0        | 0        | 0.019981 | 0        | 0         |
| ENSMUSG Kik13     | 0.84573  | 1.614158 | 1.275738 | 1.600532 | 2.57083  | 2.123251  |
| ENSMUSG Gm6205    | 0        | 0        | 0        | 0        | 0        | 0         |
| ENSMUSG Dynlt1a   | 2.179938 | 1.828868 | 1.005429 | 3.706498 | 2.892578 | 1.339146  |
| ENSMUSG Ppp1r12c  | 35.35092 | 32.42197 | 38.84704 | 26.57628 | 27.69987 | 27.055922 |
| ENSMUSG Ahr       | 24.04157 | 19.07631 | 19.14296 | 18.19846 | 23.06214 | 18.205701 |
| ENSMUSG Gm47283   | 32.0608  | 16.08359 | 26.21061 | 20.57974 | 25.62388 | 15.747188 |
| ENSMUSG Gm21117   | 0        | 0        | 0        | 0        | 0        | 0         |
| ENSMUSG Gm4177    | 0        | 0        | 0        | 0        | 0        | 0         |
| ENSMUSG Gm5726    | 0        | 0        | 0        | 0        | 0        | 0         |
| ENSMUSG Gm21985   | 0.467873 | 0.093433 | 0.361192 | 0.348001 | 0.433092 | 0.507472  |
| ENSMUSG Klrb1     | 0        | 0        | 0        | 0        | 0        | 0         |
| ENSMUSG Klrb1b    | 1.264409 | 0.935498 | 1.445508 | 0.83941  | 0.527509 | 0.698934  |
| ENSMUSG Clec7a    | 26.93546 | 20.99274 | 22.89734 | 107.1072 | 108.6545 | 121.07592 |
| Mus_musc Mus_musc | 0.147044 | 0.062859 | 0.07342  | 0.206022 | 0.175247 | 0.70352   |
| Mus_musc Mus_musc | 0        | 0.199456 | 0.103649 | 0.14856  | 0.216041 | 0.361938  |
| Mus_musc Mus_musc | 0.403228 | 0.550159 | 0.384305 | 0.580732 | 0.629222 | 1.202058  |
| Mus_musc Mus_musc | 0.788599 | 0.415577 | 0.308598 | 0.185115 | 0.220391 | 0.544136  |
| Mus_musc Mus_musc | 0        | 0        | 0.371402 | 0.167374 | 0.32683  | 0.271827  |
| Mus_musc Mus_musc | 0.622327 | 0.543864 | 0.459422 | 0.2593   | 0.36249  | 0.266965  |
| ENSMUSG Gm28079   | 0        | 0        | 0        | 0        | 0        | 0         |
| ENSMUSG Xpo5      | 9.035093 | 8.982554 | 9.240339 | 8.253368 | 8.433232 | 9.028371  |
| ENSMUSG Col4a4    | 19.18348 | 17.89398 | 16.43608 | 15.01918 | 13.64568 | 12.88081  |
| ENSMUSG Rwdd1     | 21.92023 | 20.914   | 22.51098 | 23.00406 | 23.3981  | 23.752962 |
| ENSMUSG Trdn      | 0.09539  | 0.413715 | 0.124278 | 0.143399 | 0.065066 | 0.145121  |
| ENSMUSG Clvs2     | 0        | 0        | 0        | 0        | 0        | 0         |
| ENSMUSG Hey2      | 1.55867  | 2.013948 | 1.603304 | 1.12742  | 0.935292 | 1.23022   |
| ENSMUSG Gm11172   | 0        | 0        | 0        | 0        | 0        | 0         |
| ENSMUSG Cwf19l1   | 2.879343 | 2.509684 | 2.5205   | 2.204878 | 2.981305 | 2.322994  |
| ENSMUSG Foxj1     | 20.78217 | 29.02303 | 15.96811 | 35.40652 | 35.03204 | 34.475979 |
| Mus_musc Mus_musc | 0.651551 | 0.11962  | 0.615067 | 0        | 0        | 0.659168  |
| Mus_musc Mus_musc | 0        | 0        | 0.267525 | 0.477354 | 1.070218 | 0.281038  |
| ENSMUSG Scd3      | 3.899456 | 3.767004 | 4.781135 | 3.444513 | 3.169958 | 3.857045  |
| ENSMUSG Nt5c1a    | 0        | 0.328223 | 0        | 0        | 0.089827 | 0         |
| ENSMUSG B430218F2 | 0.156149 | 0.205071 | 0.357898 | 0.030359 | 0        | 0.084946  |
| Mus_musc Mus_musc | 0.573699 | 0.587007 | 0.68126  | 0.630173 | 1.174167 | 0.304015  |
| Mus_musc Mus_musc | 1.330867 | 1.061648 | 0.842191 | 0.64331  | 0.536495 | 0.7635    |
| Mus_musc Mus_musc | 0        | 0.14848  | 0        | 0.092809 | 0        | 0         |
| Mus_musc Mus_musc | 1.963919 | 1.565668 | 0.996144 | 1.785356 | 1.40902  | 1.541228  |
| Mus_musc Mus_musc | 2.277756 | 1.409297 | 1.432866 | 1.949674 | 1.533962 | 2.185453  |
| Mus_musc Mus_musc | 1.31131  | 0.44027  | 1.361354 | 1.553364 | 1.65943  | 1.222157  |
| Mus_musc Mus_musc | 0.529082 | 0        | 0.193403 | 1.166508 | 0.19313  | 1.074632  |
| ENSMUSG Sema4g    | 0.822194 | 0.674286 | 0.995921 | 1.297127 | 1.043073 | 1.226355  |
| ENSMUSG Kcne4     | 1.640198 | 1.954913 | 1.865991 | 1.747104 | 1.988692 | 2.144103  |
| ENSMUSG B4galnt3  | 0        | 0.094751 | 0        | 0        | 0        | 0         |
| ENSMUSG Ninj2     | 0.349048 | 0.156372 | 0.060252 | 0        | 0.127599 | 0.274825  |
| ENSMUSG Ccdc9     | 25.88926 | 27.1239  | 29.14455 | 22.54178 | 22.82798 | 22.513225 |
| ENSMUSG Trappc10  | 14.75238 | 15.78973 | 15.85037 | 14.97812 | 16.16183 | 16.121704 |
| ENSMUSG Ccm2      | 21.89072 | 20.13563 | 28.07263 | 25.3578  | 24.12442 | 27.009433 |
| ENSMUSG Gm3194    | 0.02178  | 0.005107 | 0.029362 | 0        | 0        | 0.030748  |

|                   |          |          |          |          |          |           |
|-------------------|----------|----------|----------|----------|----------|-----------|
| ENSMUSG Gm21518   | 0        | 0        | 0        | 0        | 0        | 0         |
| ENSMUSG Olfr243   | 0        | 0        | 0        | 0        | 0        | 0         |
| ENSMUSG Erich6b   | 0        | 0        | 0        | 0        | 0        | 0         |
| ENSMUSG Slc25a30  | 5.653048 | 6.796682 | 5.822267 | 5.866995 | 5.894259 | 6.076362  |
| ENSMUSG Zc3h13    | 10.88713 | 10.68654 | 9.946353 | 9.055515 | 8.562991 | 8.951778  |
| ENSMUSG Gpalpp1   | 10.68506 | 10.84031 | 9.112352 | 8.982288 | 9.158421 | 9.002185  |
| ENSMUSG Nufip1    | 2.394156 | 2.617064 | 2.644346 | 2.063234 | 2.663749 | 2.538625  |
| ENSMUSG Tcp10b    | 0.080574 | 0.116687 | 0.168697 | 0.172336 | 0.033472 | 0.04199   |
| ENSMUSG Hba-x     | 0        | 0        | 0.094064 | 0        | 0        | 0         |
| ENSMUSG Srebf1    | 29.3211  | 28.40297 | 31.13383 | 29.42923 | 26.55509 | 30.207651 |
| ENSMUSG Gm13306   | 0.094189 | 0.197113 | 0.215329 | 0.029003 | 0.077962 | 0         |
| ENSMUSG Ggnbp2    | 26.68158 | 29.18988 | 30.24389 | 27.12674 | 25.86561 | 26.65202  |
| ENSMUSG Acaca     | 8.087881 | 10.47889 | 8.08438  | 11.00224 | 9.821767 | 11.901975 |
| ENSMUSG Shmt1     | 3.161876 | 3.276976 | 2.558228 | 3.707253 | 3.801152 | 4.672369  |
| ENSMUSG Llgl1     | 13.18287 | 12.62116 | 13.95707 | 11.24356 | 10.40919 | 10.160678 |
| ENSMUSG Drg2      | 16.81988 | 17.28807 | 15.17396 | 13.84295 | 16.12075 | 15.424687 |
| ENSMUSG Ces2h     | 0        | 0        | 0        | 0        | 0        | 0         |
| ENSMUSG Inafm1    | 6.323128 | 6.943629 | 8.180089 | 5.802924 | 5.391279 | 5.689003  |
| ENSMUSG Ptprn2    | 0.185965 | 0.341015 | 0.269018 | 1.402053 | 1.269957 | 1.200909  |
| ENSMUSG Gm8050    | 0        | 0        | 0        | 0        | 0        | 0         |
| ENSMUSG Pinlyp    | 0        | 0        | 0.057114 | 0        | 0        | 0         |
| ENSMUSG Lmcd1     | 13.80819 | 10.81605 | 13.82591 | 9.525674 | 9.880557 | 10.439633 |
| ENSMUSG Colq      | 4.473486 | 2.60784  | 4.534864 | 3.498492 | 2.909678 | 3.144263  |
| ENSMUSG Lce1a1    | 0        | 0        | 0.161268 | 0        | 0.094803 | 0         |
| ENSMUSG Ebna1bp2  | 12.6919  | 13.25015 | 14.53219 | 11.71079 | 11.80461 | 11.605352 |
| Mus_musc Mus_musc | 0.188031 | 0        | 0        | 0        | 0        | 0         |
| Mus_musc Mus_musc | 9.707959 | 7.918736 | 6.446867 | 4.863316 | 7.965942 | 6.599116  |
| Mus_musc Mus_musc | 0.058034 | 0        | 0        | 0.02766  | 0        | 0.086977  |
| Mus_musc Mus_musc | 0        | 0.260343 | 0        | 0.107326 | 0.117439 | 0.173691  |
| Mus_musc Mus_musc | 0        | 0        | 0        | 0        | 0        | 0         |
| ENSMUSG 1700029F1 | 0        | 0        | 0        | 0        | 0        | 0         |
| ENSMUSG Nexn      | 9.608774 | 10.79055 | 11.72749 | 8.830052 | 8.228619 | 8.280496  |
| ENSMUSG Trpm3     | 0.100934 | 0.076926 | 0.040179 | 0.116286 | 0.130669 | 0.147983  |
| ENSMUSG Nrros     | 16.66064 | 12.66506 | 17.01601 | 23.81121 | 21.74955 | 23.449071 |
| ENSMUSG 6-Mar     | 26.84734 | 26.8048  | 23.95539 | 19.98164 | 22.39974 | 19.609995 |
| ENSMUSG Rnase9    | 0        | 0        | 0        | 0        | 0        | 0         |
| ENSMUSG Htr5a     | 0        | 0        | 0        | 0        | 0        | 0         |
| ENSMUSG Atp6v1g1  | 103.511  | 101.0652 | 100.5518 | 103.6054 | 100.2394 | 92.227898 |
| ENSMUSG F13a1     | 2.565752 | 3.763459 | 5.709076 | 5.505037 | 4.508488 | 6.034523  |
| ENSMUSG Lsm14b    | 12.27204 | 13.33172 | 12.80658 | 10.95985 | 11.05979 | 10.59683  |
| ENSMUSG Lnpep     | 16.37175 | 17.20972 | 14.83937 | 15.65673 | 14.82152 | 14.645672 |
| ENSMUSG Zfp983    | 2.009576 | 2.573697 | 2.362493 | 2.209678 | 1.956716 | 2.227218  |
| ENSMUSG Syt1      | 0.09897  | 0.097804 | 0.027513 | 0.060545 | 0.043962 | 0.049906  |
| ENSMUSG Cdhr3     | 7.50865  | 8.778436 | 4.302179 | 10.29456 | 10.44206 | 9.653374  |
| ENSMUSG Tmprss11k | 0        | 0        | 0        | 0        | 0        | 0         |
| ENSMUSG Palm      | 10.54593 | 10.18816 | 10.63641 | 8.800289 | 6.392733 | 9.101277  |
| ENSMUSG Polr3c    | 9.233843 | 9.305642 | 9.207267 | 11.55265 | 9.230113 | 10.94012  |
| ENSMUSG Rnf115    | 19.07594 | 20.04195 | 22.61656 | 19.63263 | 20.12219 | 21.034506 |
| ENSMUSG Gpr89     | 4.838388 | 5.079902 | 5.03014  | 4.699514 | 4.975688 | 5.271287  |
| ENSMUSG Acp6      | 7.912971 | 8.167922 | 7.467672 | 6.396433 | 6.604854 | 7.11625   |
| ENSMUSG Galr3     | 0.282037 | 0.036687 | 0        | 0.053393 | 0.268391 | 0.303279  |
| ENSMUSG Parp8     | 4.523142 | 4.768116 | 4.867987 | 6.327425 | 5.010421 | 4.738157  |
| ENSMUSG Rnf180    | 1.487848 | 1.713768 | 1.605837 | 1.605879 | 2.581133 | 2.721689  |
| ENSMUSG Htr1a     | 0        | 0        | 0        | 0        | 0        | 0         |
| ENSMUSG Emb       | 71.26093 | 75.95984 | 66.83505 | 70.06892 | 67.88974 | 72.280754 |
| ENSMUSG Tmem190   | 0.669124 | 0.796697 | 0.473538 | 0.566956 | 0.291291 | 0.488766  |
| ENSMUSG Zfp58     | 3.04166  | 2.780855 | 2.736668 | 2.506755 | 2.912406 | 2.693286  |
| ENSMUSG Tas2r107  | 0        | 0        | 0        | 0        | 0        | 0         |
| ENSMUSG Trim50    | 0        | 0        | 0        | 0        | 0        | 0         |
| ENSMUSG Gm10486   | 0        | 0        | 0        | 0        | 0        | 0         |
| ENSMUSG Nedd9     | 35.43523 | 32.70398 | 36.56472 | 28.40649 | 26.57626 | 30.101544 |
| ENSMUSG Mak       | 2.96165  | 2.700818 | 2.123498 | 2.661094 | 2.511182 | 2.124974  |
| ENSMUSG Clec3a    | 0        | 0        | 0        | 0        | 0        | 0         |
| ENSMUSG Flnc      | 1.001489 | 1.334611 | 0.917635 | 1.086215 | 1.05204  | 1.183271  |

|                   |          |          |          |          |          |           |
|-------------------|----------|----------|----------|----------|----------|-----------|
| ENSMUSG Prkg1     | 5.40339  | 4.446695 | 4.318052 | 3.202038 | 3.51341  | 3.181037  |
| ENSMUSG Arhgef15  | 43.11988 | 40.61718 | 40.86291 | 23.85947 | 24.58452 | 21.618315 |
| ENSMUSG Rnaseh2a  | 8.037323 | 8.259093 | 8.563861 | 6.541443 | 7.420021 | 8.546845  |
| ENSMUSG Ctif      | 4.007296 | 4.139678 | 4.79592  | 3.512939 | 3.468673 | 3.67455   |
| ENSMUSG Myoz1     | 0        | 0.071588 | 0.187022 | 0.150931 | 0        | 0         |
| ENSMUSG Gpr88     | 0.380422 | 0.604923 | 0.294299 | 0.806123 | 0.730409 | 1.042855  |
| ENSMUSG Gm17124   | 0        | 0        | 0        | 0        | 0        | 0         |
| ENSMUSG Spink2    | 0.073984 | 0.057958 | 0        | 0.61278  | 1.204476 | 0.417119  |
| ENSMUSG Ndufb4    | 18.74795 | 19.8579  | 18.45893 | 18.96462 | 15.10728 | 19.450809 |
| ENSMUSG Hgd       | 0.065181 | 0.049774 | 0.042681 | 0        | 0        | 0         |
| ENSMUSG Abcc5     | 17.06698 | 17.46761 | 18.13755 | 18.93111 | 17.59747 | 20.007686 |
| ENSMUSG Muc13     | 0.028499 | 0.089136 | 0.051153 | 0.224682 | 0.155344 | 0.090278  |
| ENSMUSG Rabl3     | 2.36764  | 1.989907 | 2.505678 | 3.297151 | 2.271807 | 3.166361  |
| ENSMUSG Gtf2e1    | 5.559061 | 5.80406  | 5.430662 | 6.038597 | 5.608337 | 5.503072  |
| ENSMUSG Stxbp5l   | 0        | 0        | 0        | 0        | 0        | 0.02448   |
| ENSMUSG Zc3h10    | 5.910336 | 5.700845 | 7.279382 | 5.427709 | 4.63407  | 5.630748  |
| ENSMUSG Alpk2     | 0        | 0.058922 | 0        | 0.14737  | 0.103815 | 0.106513  |
| ENSMUSG Abcc10    | 2.010436 | 1.99701  | 2.021391 | 2.124479 | 1.913032 | 1.737688  |
| ENSMUSG Prr5l     | 9.128542 | 7.89224  | 9.466173 | 5.937232 | 5.379646 | 5.436227  |
| ENSMUSG 2410131K: | 4.132864 | 3.499397 | 4.165357 | 3.287069 | 3.270074 | 3.996     |
| ENSMUSG Abcc4     | 3.052377 | 2.549775 | 2.979335 | 3.069328 | 2.746335 | 3.098726  |
| ENSMUSG Sgpl1     | 21.62261 | 21.19487 | 19.84491 | 29.53098 | 30.2076  | 34.541968 |
| ENSMUSG Tbeta     | 1.236537 | 1.063923 | 0.328632 | 1.022499 | 0.726245 | 1.20623   |
| Mus_musc Mus_musc | 1.102918 | 0.704612 | 0.579925 | 0.863242 | 1.058014 | 0.934158  |
| ENSMUSG Pald1     | 28.02892 | 25.68593 | 28.14815 | 19.02793 | 18.75787 | 18.404774 |
| ENSMUSG Eif4ebp2  | 46.31761 | 46.77926 | 44.16505 | 38.15481 | 40.10758 | 37.601807 |
| ENSMUSG Npffr1    | 0.032428 | 0.039919 | 0.029135 | 0.023118 | 0        | 0         |
| ENSMUSG Jakmip1   | 1.689446 | 0.908561 | 1.198254 | 2.586638 | 2.80157  | 3.65235   |
| ENSMUSG Unc5b     | 5.834749 | 5.609061 | 6.104752 | 4.900098 | 4.806999 | 6.630756  |
| ENSMUSG Pcbd1     | 6.764366 | 5.487367 | 4.333244 | 5.991601 | 5.587402 | 7.241197  |
| ENSMUSG 20101110  | 20.51089 | 18.62713 | 17.65079 | 23.1903  | 20.15379 | 22.845539 |
| ENSMUSG Fthl17f   | 0        | 0        | 0        | 0        | 0        | 0         |
| ENSMUSG Trim6     | 0.513219 | 0.616234 | 0.670561 | 0.267686 | 0.389505 | 0.351988  |
| ENSMUSG Art1      | 0.024066 | 1.384127 | 0.119726 | 0.719363 | 0.865891 | 0.150982  |
| ENSMUSG D7Ertd443 | 0        | 0.043565 | 0.030441 | 0.017473 | 0        | 0.056941  |
| ENSMUSG Pgap2     | 18.78678 | 20.30186 | 19.82986 | 27.34027 | 28.37495 | 29.220262 |
| ENSMUSG Usp17la   | 0        | 0        | 0        | 0        | 0        | 0         |
| ENSMUSG Bub1      | 0.265695 | 0.485458 | 0.601474 | 1.08769  | 1.921741 | 1.449773  |
| ENSMUSG Sema4d    | 6.977269 | 5.504736 | 9.109905 | 13.94001 | 12.41564 | 13.610662 |
| ENSMUSG Cacna1e   | 0.136969 | 0.154495 | 0.087689 | 0.750514 | 0.580219 | 0.961651  |
| ENSMUSG Prom2     | 0.39202  | 0.227249 | 0.217863 | 0.119264 | 0.098407 | 0.227045  |
| ENSMUSG Mal       | 7.041905 | 8.24813  | 7.408015 | 9.185428 | 9.075916 | 10.456714 |
| ENSMUSG Mrps5     | 4.63008  | 4.591088 | 5.244467 | 4.784764 | 4.378646 | 4.123803  |
| ENSMUSG Gm4884    | 0        | 0        | 0        | 0        | 0        | 0         |
| ENSMUSG Fahd2a    | 4.239247 | 4.793972 | 4.70845  | 3.885762 | 4.17013  | 4.116586  |
| ENSMUSG Akr1c14   | 62.83264 | 72.54987 | 50.27348 | 28.48905 | 35.31484 | 25.45985  |
| ENSMUSG Adra2a    | 0.110365 | 0.216179 | 0.072712 | 2.824455 | 2.792969 | 2.675764  |
| ENSMUSG 4930474N  | 0        | 0        | 0        | 0        | 0        | 0         |
| ENSMUSG lghv6-5   | 0        | 0        | 0        | 0.17543  | 0        | 0         |
| ENSMUSG Foxn3     | 11.78242 | 13.18529 | 10.16905 | 11.19005 | 11.03151 | 11.390245 |
| ENSMUSG Olfr890   | 0        | 0        | 0        | 0        | 0        | 0         |
| ENSMUSG Bst2      | 55.11911 | 50.50394 | 109.063  | 64.61626 | 53.14251 | 57.648666 |
| ENSMUSG Gm21860   | 0.28722  | 0.222725 | 0.360288 | 0.585215 | 0.751754 | 0.299824  |
| ENSMUSG Fbp2      | 12.26426 | 10.37069 | 13.93524 | 9.207562 | 10.15881 | 13.242366 |
| ENSMUSG Glipr1l1  | 0        | 0        | 0        | 0        | 0        | 0         |
| ENSMUSG Syk       | 11.02918 | 10.61406 | 11.48839 | 23.1916  | 23.85246 | 25.558023 |
| ENSMUSG Endod1    | 19.15716 | 19.5664  | 18.38445 | 17.41365 | 17.58646 | 18.668861 |
| ENSMUSG Best1     | 0.086603 | 0.08261  | 0.032975 | 0.028278 | 0        | 0         |
| ENSMUSG Serpine1  | 17.2834  | 12.23097 | 14.66908 | 6.051324 | 6.657371 | 7.350108  |
| ENSMUSG Tbc1d2b   | 20.06943 | 20.0194  | 18.42073 | 16.42243 | 16.3631  | 16.403813 |
| ENSMUSG Dmxl1     | 8.142188 | 9.114076 | 6.418815 | 7.772066 | 8.114599 | 7.290668  |
| ENSMUSG Ranbp10   | 9.716062 | 9.695989 | 9.527213 | 8.500122 | 9.013937 | 9.075608  |
| ENSMUSG Sass6     | 1.548087 | 1.967078 | 1.866902 | 2.375172 | 2.259557 | 2.449058  |
| ENSMUSG 1700066B: | 0.137719 | 0.014562 | 0.069895 | 0.218771 | 0.261399 | 0.420377  |

|                   |          |          |          |          |          |           |
|-------------------|----------|----------|----------|----------|----------|-----------|
| ENSMUSG Ecsr      | 73.81246 | 64.88313 | 76.19167 | 54.77994 | 53.35515 | 50.24155  |
| ENSMUSG Slc50a1   | 36.11311 | 33.23768 | 36.72235 | 30.16621 | 28.26475 | 29.213399 |
| ENSMUSG Pmvk      | 17.04396 | 19.59212 | 20.07337 | 16.64085 | 18.56391 | 21.054995 |
| ENSMUSG Adar      | 12.72182 | 11.32458 | 15.06312 | 13.17317 | 14.01076 | 13.919547 |
| ENSMUSG Chrn2     | 0.210473 | 0.375231 | 0.345249 | 0.392853 | 0.343078 | 0.413808  |
| ENSMUSG Slc35a3   | 10.22336 | 10.22267 | 9.330978 | 9.155351 | 9.987871 | 9.587766  |
| ENSMUSG Tmem144   | 2.298584 | 1.968496 | 1.934809 | 1.644252 | 1.757955 | 1.498563  |
| ENSMUSG Fam198b   | 9.439474 | 8.622712 | 7.289753 | 7.199509 | 7.269507 | 8.909944  |
| ENSMUSG Pcdhb22   | 0.364711 | 0.599487 | 0.513911 | 0.612772 | 0.382063 | 0.440284  |
| ENSMUSG Gab1      | 18.95412 | 18.57331 | 18.24308 | 12.68524 | 13.75425 | 12.834207 |
| ENSMUSG Smarca5   | 13.52613 | 13.38777 | 12.55802 | 12.87951 | 12.59296 | 12.689582 |
| ENSMUSG Il15      | 2.903699 | 2.559186 | 3.504752 | 2.180421 | 2.765897 | 2.81815   |
| ENSMUSG Ucp1      | 0.028963 | 0        | 0        | 0        | 0        | 0         |
| ENSMUSG Zfp330    | 14.92201 | 12.98744 | 16.28605 | 14.34272 | 13.70762 | 14.092392 |
| ENSMUSG Phyhip    | 0.308656 | 0.606471 | 0.107088 | 0.544552 | 0.411933 | 0.479416  |
| ENSMUSG Trak2     | 33.35691 | 34.71685 | 30.80438 | 24.70663 | 26.92489 | 22.835927 |
| ENSMUSG Casp8     | 15.47966 | 14.38511 | 21.54912 | 17.33741 | 17.86817 | 16.656536 |
| ENSMUSG Smarcd1   | 9.318278 | 7.482054 | 8.528163 | 7.555373 | 6.853245 | 6.897649  |
| ENSMUSG Gpd1      | 10.01042 | 11.96471 | 7.643195 | 14.41591 | 12.26642 | 17.035652 |
| ENSMUSG Als2      | 5.183429 | 5.583431 | 5.262172 | 6.03486  | 6.140309 | 6.615528  |
| ENSMUSG Asic1     | 1.336742 | 1.241376 | 1.400437 | 1.176237 | 1.001032 | 1.120407  |
| ENSMUSG Stradb    | 5.863526 | 5.642354 | 5.60847  | 5.254048 | 6.264624 | 5.950487  |
| ENSMUSG Nop58     | 3.36841  | 3.190288 | 3.887086 | 3.766234 | 3.404998 | 4.216142  |
| ENSMUSG Aqp2      | 0.228049 | 0.228908 | 0.077265 | 0.088541 | 0.017893 | 0.028082  |
| ENSMUSG Tmbim6    | 376.9787 | 334.1739 | 359.1952 | 300.5389 | 292.6345 | 290.25175 |
| ENSMUSG Cdk15     | 0        | 0        | 0        | 0        | 0        | 0         |
| ENSMUSG Mrgpra1   | 0        | 0        | 0        | 0        | 0        | 0         |
| ENSMUSG Nek9      | 34.89312 | 33.97985 | 32.12677 | 25.77413 | 29.56081 | 28.193508 |
| ENSMUSG Traf3ip1  | 9.138842 | 10.02104 | 8.724461 | 10.72525 | 10.15036 | 9.891079  |
| ENSMUSG Sdhd      | 43.781   | 48.20742 | 46.12918 | 59.84975 | 63.70683 | 66.11763  |
| ENSMUSG Fhod3     | 0.303974 | 0.48938  | 0.306687 | 0.379125 | 0.259726 | 0.325076  |
| ENSMUSG Med13     | 13.49084 | 13.22016 | 11.0831  | 11.15508 | 12.12562 | 11.143517 |
| ENSMUSG Gm7298    | 0        | 0        | 0        | 0        | 0        | 0         |
| ENSMUSG Gpr35     | 1.253242 | 0.97808  | 2.049009 | 4.610837 | 4.443329 | 4.46404   |
| ENSMUSG Krt82     | 0        | 0        | 0        | 0        | 0        | 0         |
| ENSMUSG Agps      | 13.31602 | 14.60088 | 11.97887 | 13.77402 | 13.77573 | 13.88194  |
| ENSMUSG Sprr2h    | 0        | 0        | 0        | 0        | 0        | 0         |
| ENSMUSG Adam29    | 0        | 0        | 0        | 0        | 0        | 0         |
| ENSMUSG Copz1     | 38.14403 | 42.46355 | 42.07293 | 44.15996 | 47.85263 | 46.378638 |
| ENSMUSG Kbtbd6    | 0.520741 | 0.443741 | 0.40531  | 0.609952 | 0.511072 | 0.695935  |
| ENSMUSG Nudt19    | 7.069916 | 6.31043  | 6.770973 | 8.42373  | 7.854971 | 8.662444  |
| ENSMUSG Fam151a   | 0.007306 | 0.079519 | 0.057734 | 0        | 0.003183 | 0.066637  |
| ENSMUSG Gipc3     | 5.327094 | 4.350022 | 4.680602 | 2.847074 | 2.457966 | 2.517927  |
| ENSMUSG Mdga1     | 0.043788 | 0.10925  | 0.153617 | 0.263451 | 0.530619 | 0.358757  |
| ENSMUSG Fbxl7     | 2.475788 | 2.393859 | 2.266341 | 1.910609 | 2.052165 | 2.192918  |
| ENSMUSG Vmn2r5    | 0        | 0        | 0        | 0        | 0        | 0         |
| Mus_musc Mus_musc | 0        | 0        | 0        | 0        | 0        | 0         |
| Mus_musc Mus_musc | 0        | 0        | 0.329891 | 0        | 0        | 0         |
| Mus_musc Mus_musc | 0        | 0        | 0        | 0.301762 | 0        | 0         |
| Mus_musc Mus_musc | 0.192618 | 0.554916 | 0.22645  | 0.238723 | 0.123553 | 0.062085  |
| Mus_musc Mus_musc | 0.49058  | 0.781626 | 0.560362 | 0.65628  | 0.326039 | 0.380404  |
| Mus_musc Mus_musc | 0        | 0        | 0        | 0        | 0        | 0         |
| Mus_musc Mus_musc | 0.140069 | 0        | 0.097624 | 0.555045 | 0        | 0.183771  |
| ENSMUSG Olfr624   | 0        | 0        | 0        | 0        | 0        | 0         |
| ENSMUSG Ttc6      | 0.69214  | 1.038045 | 0.604395 | 0.514482 | 0.73045  | 0.472507  |
| ENSMUSG Epm2aip1  | 10.81491 | 11.52026 | 8.017696 | 8.653226 | 7.966427 | 9.609082  |
| ENSMUSG Pakap     | 1.600428 | 1.51512  | 0.836223 | 1.606271 | 0.568556 | 1.810561  |
| ENSMUSG Pira2     | 5.041058 | 4.217594 | 5.706275 | 7.502357 | 7.547584 | 8.764253  |
| ENSMUSG Ugt1a5    | 0        | 0        | 0        | 0        | 0.039232 | 0         |
| ENSMUSG Epor      | 2.564132 | 2.169212 | 2.14367  | 1.324806 | 1.455158 | 1.240267  |
| ENSMUSG Slc35e2   | 4.885281 | 4.648497 | 3.973639 | 4.512342 | 4.27968  | 4.073465  |
| ENSMUSG Zfp688    | 3.644751 | 4.265171 | 5.012097 | 6.136575 | 3.767536 | 5.426068  |
| ENSMUSG Zfp574    | 8.446216 | 8.745495 | 9.131908 | 7.177144 | 6.860752 | 7.803014  |
| ENSMUSG Kdm5b     | 6.241395 | 5.868082 | 5.060026 | 5.518614 | 4.97272  | 4.778524  |

|                   |          |          |          |          |          |           |
|-------------------|----------|----------|----------|----------|----------|-----------|
| ENSMUSG Morn2     | 5.628597 | 6.695812 | 5.115484 | 5.101818 | 4.976928 | 5.990079  |
| ENSMUSG Klhdc9    | 0.269284 | 0.356421 | 0.223549 | 0.876334 | 0.518416 | 1.431694  |
| ENSMUSG 0610010FC | 6.047535 | 5.299514 | 5.254204 | 4.796935 | 5.100914 | 5.257535  |
| ENSMUSG Cmtm7     | 8.715772 | 7.093176 | 11.19196 | 20.9655  | 20.62576 | 21.218041 |
| ENSMUSG Stt3b     | 37.25203 | 35.721   | 37.83    | 34.41076 | 37.42648 | 38.543705 |
| ENSMUSG Cmtm6     | 43.99547 | 40.2078  | 42.73795 | 45.76977 | 46.11679 | 45.106659 |
| ENSMUSG Dync1li1  | 18.93634 | 19.01418 | 19.87489 | 17.13491 | 18.16034 | 17.624592 |
| ENSMUSG Crtap     | 20.28156 | 18.57173 | 20.35363 | 18.03874 | 19.00665 | 22.699415 |
| ENSMUSG Spata32   | 0        | 0        | 0        | 0        | 0        | 0         |
| ENSMUSG Zfp36     | 63.68902 | 37.50207 | 51.64491 | 22.44951 | 26.95955 | 25.445256 |
| ENSMUSG Hjurp     | 12.31766 | 13.54482 | 12.58513 | 10.6894  | 11.99325 | 11.692434 |
| ENSMUSG Fads6     | 0.884215 | 0.864861 | 0.712391 | 0.884597 | 0.766644 | 1.488259  |
| ENSMUSG Slc22a5   | 12.62768 | 12.57829 | 11.98536 | 7.20865  | 8.883539 | 7.954428  |
| ENSMUSG Cfap77    | 2.862799 | 2.430194 | 1.655945 | 3.581161 | 2.630421 | 3.026415  |
| ENSMUSG H2-Q1     | 35.11194 | 33.58885 | 74.85326 | 60.66048 | 42.68994 | 58.395828 |
| ENSMUSG Zfx       | 8.288802 | 8.680926 | 8.050434 | 7.186028 | 6.662863 | 6.734156  |
| ENSMUSG Apoo      | 6.19657  | 4.862292 | 7.656088 | 9.572016 | 8.524061 | 5.425471  |
| ENSMUSG Alox12e   | 0.037897 | 0        | 0.020786 | 1.297936 | 0.849211 | 0.971541  |
| ENSMUSG 5430402E1 | 0        | 0        | 0        | 0        | 0        | 0         |
| ENSMUSG Olfr683   | 0        | 0        | 0        | 0        | 0        | 0         |
| ENSMUSG Proca1    | 1.90913  | 2.427656 | 1.596695 | 1.932212 | 2.655841 | 1.48449   |
| ENSMUSG Crx       | 0        | 0        | 0        | 0        | 0        | 0         |
| ENSMUSG Selenow   | 137.2288 | 139.7803 | 151.6915 | 131.3982 | 115.7474 | 122.13075 |
| ENSMUSG Camsap2   | 16.4393  | 18.59107 | 14.80252 | 12.01592 | 13.56788 | 12.795216 |
| ENSMUSG Prelp     | 95.16447 | 91.26129 | 102.4394 | 66.66538 | 65.68307 | 61.586658 |
| ENSMUSG Atp9b     | 14.84519 | 13.83914 | 13.97301 | 12.55535 | 12.3644  | 12.265057 |
| ENSMUSG Sall3     | 0        | 0        | 0        | 0        | 0        | 0         |
| ENSMUSG Smad2     | 13.08039 | 13.2324  | 14.18457 | 15.4278  | 13.03818 | 14.875791 |
| ENSMUSG Mbd1      | 27.64208 | 29.98871 | 26.73607 | 22.86362 | 23.7356  | 22.957884 |
| ENSMUSG Cxxc1     | 24.333   | 24.98788 | 23.68407 | 22.12436 | 20.81577 | 22.417393 |
| Mus_musc Mus_musc | 0.83865  | 0.865172 | 0.962455 | 0.639942 | 0.612519 | 0.57948   |
| Mus_musc Mus_musc | 0.54184  | 0.669072 | 0.372159 | 0.350491 | 0.19353  | 0.60078   |
| Mus_musc Mus_musc | 0.308276 | 0        | 0.189811 | 0        | 0        | 0.139841  |
| Mus_musc Mus_musc | 0.887966 | 2.310779 | 3.387562 | 4.558029 | 1.947953 | 2.713507  |
| Mus_musc Mus_musc | 28.70606 | 28.12541 | 33.07517 | 28.95818 | 26.39052 | 25.9179   |
| ENSMUSG Olfr1247  | 0        | 0        | 0        | 0        | 0        | 0         |
| ENSMUSG Olfr1241  | 0        | 0        | 0        | 0        | 0        | 0         |
| ENSMUSG Olfr1243  | 0        | 0        | 0        | 0        | 0        | 0         |
| ENSMUSG Olfr1242  | 0        | 0        | 0        | 0        | 0        | 0         |
| ENSMUSG Olfr1239  | 0        | 0        | 0        | 0        | 0        | 0         |
| ENSMUSG Khdc1b    | 0.017323 | 0        | 0.067922 | 0        | 0.025116 | 0         |
| ENSMUSG Cers6     | 5.908937 | 5.798792 | 7.078154 | 7.300741 | 6.772385 | 6.770864  |
| ENSMUSG Stk39     | 3.364053 | 3.147826 | 2.758112 | 3.138647 | 3.435232 | 3.411144  |
| ENSMUSG Gm13199   | 0.566999 | 0.691845 | 0.486554 | 0.878764 | 0.522143 | 0.237633  |
| ENSMUSG Tppp3     | 231.4027 | 245.6017 | 214.9683 | 146.9426 | 130.4477 | 141.84256 |
| ENSMUSG Tubb1     | 6.213529 | 5.499545 | 8.546836 | 2.808702 | 2.901433 | 2.602318  |
| Mus_musc Mus_musc | 0        | 0        | 0        | 0        | 0        | 0         |
| ENSMUSG Dnajc5    | 29.52889 | 27.07737 | 25.91153 | 26.51852 | 24.18421 | 25.375801 |
| ENSMUSG Tpd52l2   | 31.18144 | 30.50906 | 31.59167 | 23.55598 | 30.69477 | 28.797673 |
| ENSMUSG Zfp512b   | 6.661858 | 5.887898 | 6.076627 | 5.641429 | 4.860754 | 5.238844  |
| ENSMUSG Kndc1     | 1.477464 | 1.757202 | 0.981137 | 1.842414 | 1.692379 | 2.098777  |
| Mus_musc Mus_musc | 0.200175 | 0.063069 | 0.213126 | 0.238027 | 0        | 0         |
| Mus_musc Mus_musc | 0.061024 | 0        | 0        | 0.375211 | 0.493428 | 0         |
| Mus_musc Mus_musc | 0        | 0.154309 | 0        | 0        | 0        | 0         |
| ENSMUSG Olfr138   | 0        | 0        | 0        | 0        | 0        | 0         |
| Mus_musc Mus_musc | 0        | 0        | 0        | 0.392194 | 0        | 0.14746   |
| Mus_musc Mus_musc | 0.112885 | 0        | 0.486466 | 0.208    | 0        | 0         |
| ENSMUSG Cts8      | 0        | 0        | 0        | 0        | 0        | 0         |
| Mus_musc Mus_musc | 0        | 0        | 0        | 0        | 0        | 0         |
| Mus_musc Mus_musc | 0        | 0.88762  | 0.408138 | 0.099584 | 0        | 0.241778  |
| Mus_musc Mus_musc | 0        | 0.074615 | 0.063965 | 0.372627 | 0.333305 | 0.250508  |
| Mus_musc Mus_musc | 0.667642 | 0.571631 | 0.706858 | 0.828581 | 0.508664 | 0.669586  |
| Mus_musc Mus_musc | 0        | 0.246227 | 0.271254 | 0.44503  | 0        | 0         |
| Mus_musc Mus_musc | 0.26677  | 0.312356 | 0.559469 | 0.642772 | 0.312418 | 0.46579   |

|                    |          |          |          |          |          |           |
|--------------------|----------|----------|----------|----------|----------|-----------|
| Mus_musc Mus_musc  | 0.237809 | 0.385395 | 0.291966 | 0.21692  | 0.151845 | 0.289822  |
| Mus_musc Mus_musc  | 0        | 0        | 0        | 0.175408 | 0.318124 | 0         |
| Mus_musc Mus_musc  | 0.074552 | 0        | 0        | 0.59172  | 0.529274 | 0.701156  |
| Mus_musc Mus_musc  | 0.627458 | 0.24667  | 0        | 1.028643 | 0.440158 | 1.113408  |
| Mus_musc Mus_musc  | 0        | 0.214517 | 0        | 0.090026 | 0        | 0         |
| ENSMUSG Olfr379-ps | 0        | 0        | 0        | 0        | 0        | 0         |
| ENSMUSG Ceacam13   | 0        | 0        | 0        | 0        | 0        | 0         |
| ENSMUSG AB124611   | 4.172275 | 3.16976  | 7.391874 | 10.21307 | 8.581443 | 10.321185 |
| ENSMUSG Slc44a2    | 101.8272 | 97.11317 | 97.55922 | 71.09288 | 71.38408 | 75.366816 |
| ENSMUSG Jmjd7      | 1.134364 | 0.464346 | 1.240108 | 2.061422 | 1.248745 | 1.642451  |
| ENSMUSG 1700064H   | 0        | 0        | 0        | 0        | 0        | 0         |
| ENSMUSG Gm28044    | 0.02966  | 0.098421 | 0.022035 | 0.095721 | 0.051345 | 0.052345  |
| Mus_musc Mus_musc  | 0        | 0        | 0        | 0        | 0        | 0         |
| Mus_musc Mus_musc  | 0.894055 | 0.880776 | 1.020261 | 0.594392 | 0.516625 | 0.836968  |
| Mus_musc Mus_musc  | 0        | 0        | 0        | 0.238283 | 0.403793 | 0         |
| Mus_musc Mus_musc  | 0.160213 | 0.193803 | 0.226769 | 0.342138 | 0.066733 | 0.336547  |
| Mus_musc Mus_musc  | 0        | 0        | 0        | 0.198111 | 0        | 0         |
| Mus_musc Mus_musc  | 0        | 0        | 0        | 0        | 0        | 0         |
| Mus_musc Mus_musc  | 0        | 0        | 0        | 0        | 0        | 0         |
| Mus_musc Mus_musc  | 0        | 0        | 0        | 0        | 0        | 0         |
| Mus_musc Mus_musc  | 0        | 0.052435 | 0.233754 | 0.091983 | 0.150039 | 0.100736  |
| Mus_musc Mus_musc  | 2.418154 | 2.034015 | 2.63782  | 3.132667 | 2.820982 | 3.235256  |
| ENSMUSG Gm21812    | 0        | 0        | 0        | 0        | 0        | 0         |
| ENSMUSG Snrpa      | 24.94981 | 24.19163 | 28.31079 | 27.11111 | 26.35542 | 29.873075 |
| ENSMUSG Hist1h2ap  | 0        | 0.024011 | 0        | 0.216257 | 0.116199 | 0.114639  |
| ENSMUSG Olfr143    | 0        | 0        | 0        | 0        | 0        | 0         |
| ENSMUSG Rps7       | 190.2887 | 179.5156 | 188.0319 | 238.5566 | 203.7945 | 217.67832 |
| ENSMUSG Mrps36     | 13.89956 | 15.28346 | 13.9684  | 20.83878 | 19.37055 | 18.8256   |
| Mus_musc Mus_musc  | 0        | 0        | 0        | 0.160062 | 0        | 0         |
| Mus_musc Mus_musc  | 0.035706 | 0.120798 | 0.166035 | 0.114964 | 0.268158 | 0.136372  |
| Mus_musc Mus_musc  | 0.521482 | 0.570622 | 0.416763 | 0.636581 | 0.578693 | 0.683181  |
| ENSMUSG Olfr463    | 0        | 0        | 0        | 0        | 0        | 0         |
| ENSMUSG Gm5935     | 0        | 0        | 0        | 0        | 0        | 0         |
| ENSMUSG Rpl36-ps4  | 0        | 0        | 0        | 0        | 0        | 0         |
| Mus_musc Mus_musc  | 0.128885 | 0.036802 | 0        | 0.204408 | 0.463635 | 0.193046  |
| Mus_musc Mus_musc  | 0.376063 | 0        | 0        | 0        | 0        | 0         |
| ENSMUSG Gm20918    | 0        | 0        | 0        | 0        | 0        | 0         |
| ENSMUSG Gm17027    | 0        | 0        | 0        | 0        | 0        | 0         |
| ENSMUSG H3f3b      | 225.0953 | 201.8614 | 185.3869 | 176.754  | 170.3435 | 159.05696 |
| Mus_musc Mus_musc  | 0        | 0        | 0        | 0.348032 | 0        | 0         |
| Mus_musc Mus_musc  | 1.783775 | 1.883436 | 1.609122 | 2.33121  | 0.9189   | 0.683783  |
| ENSMUSG Foxred2    | 0.511567 | 0.560892 | 0.442337 | 0.848667 | 0.590589 | 0.857733  |
| Mus_musc Mus_musc  | 0.93203  | 0.911975 | 0.96191  | 0.400888 | 0.387888 | 0.222487  |
| Mus_musc Mus_musc  | 0        | 0        | 0        | 0        | 0        | 0         |
| Mus_musc Mus_musc  | 0        | 0        | 0        | 0.316024 | 0        | 0         |
| Mus_musc Mus_musc  | 0.136047 | 0.253746 | 0.129524 | 0.380761 | 0.173837 | 0.22091   |
| ENSMUSG Olfr1120   | 0        | 0        | 0        | 0        | 0        | 0         |
| ENSMUSG Rtl1       | 0        | 0        | 0        | 0.001779 | 0        | 0         |
| ENSMUSG Vmn2r91    | 0        | 0        | 0        | 0        | 0        | 0         |
| ENSMUSG Gm3047     | 0        | 0        | 0        | 0        | 0        | 0         |
| ENSMUSG Gm7271     | 0        | 0        | 0        | 0        | 0        | 0         |
| ENSMUSG Vmn2r71    | 0        | 0        | 0        | 0        | 0        | 0         |
| ENSMUSG Prr23a3    | 0        | 0        | 0        | 0        | 0        | 0         |
| ENSMUSG Asb11      | 0.236829 | 0.782994 | 0.33495  | 0.562993 | 0.959172 | 0.935592  |
| ENSMUSG Vmn1r7     | 0        | 0        | 0        | 0        | 0        | 0         |
| Mus_musc Mus_musc  | 0.114843 | 0.276031 | 0        | 0        | 0        | 0         |
| ENSMUSG Olfr45     | 0        | 0        | 0        | 0        | 0        | 0         |
| ENSMUSG Rfxank     | 5.4084   | 6.080993 | 5.796429 | 5.93112  | 5.736661 | 5.691901  |
| ENSMUSG Slc9a3     | 0        | 0.02403  | 0        | 0.028731 | 0        | 0.007845  |
| ENSMUSG Mdh1       | 42.93419 | 54.97554 | 44.39512 | 53.91872 | 52.83192 | 52.880554 |
| ENSMUSG Kif18a     | 0.959234 | 1.318659 | 0.886606 | 0.939233 | 1.119877 | 1.058997  |
| ENSMUSG Lexm       | 0        | 0        | 0        | 0.021295 | 0        | 0         |
| ENSMUSG Bsx        | 0        | 0        | 0        | 0        | 0        | 0         |
| ENSMUSG Rhob       | 158.8428 | 134.5981 | 155.65   | 81.65869 | 108.7141 | 98.859871 |

|                   |          |          |          |          |          |           |
|-------------------|----------|----------|----------|----------|----------|-----------|
| ENSMUSG Abca16    | 0        | 0        | 0        | 0        | 0        | 0         |
| ENSMUSG Hs3st3b1  | 2.352327 | 2.507864 | 2.048562 | 2.945607 | 2.947827 | 2.843879  |
| ENSMUSG Cd209f    | 0.776079 | 0.766147 | 0.363939 | 1.279664 | 0.995095 | 1.743112  |
| ENSMUSG Olfr860   | 0        | 0        | 0        | 0        | 0        | 0         |
| ENSMUSG Suds3     | 26.91089 | 29.60247 | 27.35651 | 25.6822  | 26.47411 | 26.770985 |
| ENSMUSG Mpp7      | 6.70827  | 6.822728 | 5.522591 | 4.945097 | 4.702076 | 4.617984  |
| ENSMUSG Aen       | 9.029487 | 7.027131 | 11.03529 | 11.03608 | 8.375339 | 7.419738  |
| ENSMUSG Acan      | 0        | 0        | 0        | 0        | 0        | 0         |
| ENSMUSG Eef1e1    | 3.310068 | 3.220253 | 3.920867 | 3.430838 | 4.36482  | 4.183417  |
| ENSMUSG Mfge8     | 125.7721 | 109.607  | 150.7277 | 146.5757 | 135.2551 | 157.83223 |
| ENSMUSG Phc3      | 10.74563 | 13.10766 | 8.988085 | 10.6097  | 9.964979 | 10.777145 |
| ENSMUSG Psmc4     | 38.25663 | 35.25805 | 39.28798 | 34.17647 | 38.03545 | 36.015472 |
| ENSMUSG Pak4      | 28.60572 | 29.3229  | 32.3371  | 20.6799  | 23.09388 | 22.097573 |
| ENSMUSG Gramd3    | 6.425406 | 7.148932 | 6.486144 | 7.767834 | 8.695527 | 7.986047  |
| ENSMUSG Olfr1205  | 0        | 0        | 0        | 0        | 0        | 0         |
| ENSMUSG Olfr915   | 0        | 0        | 0        | 0        | 0        | 0         |
| ENSMUSG Gm20914   | 0        | 0        | 0        | 0        | 0        | 0         |
| ENSMUSG Dnajc28   | 2.330008 | 3.140861 | 2.734665 | 2.663379 | 2.459176 | 2.31308   |
| ENSMUSG Il22ra2   | 0.218893 | 0.189149 | 0.222904 | 0.137862 | 0.204853 | 0.080812  |
| ENSMUSG Slit2     | 5.741317 | 5.061406 | 5.043071 | 3.878111 | 3.721143 | 3.91265   |
| ENSMUSG Phxr2     | 0.041532 | 0        | 0        | 0        | 0        | 0         |
| ENSMUSG Cc2d2a    | 5.391383 | 5.356957 | 4.148886 | 4.387371 | 4.96966  | 4.674641  |
| ENSMUSG Zfp712    | 0.989819 | 1.105327 | 1.498414 | 1.143604 | 0.964938 | 0.875349  |
| ENSMUSG Adam9     | 39.76664 | 40.45691 | 42.50445 | 43.5772  | 46.62385 | 45.831212 |
| ENSMUSG Tm2d2     | 37.64692 | 42.33971 | 40.07319 | 37.86259 | 36.08323 | 40.016598 |
| ENSMUSG Plekha2   | 24.42748 | 24.35256 | 29.18638 | 24.41449 | 23.63902 | 22.86446  |
| ENSMUSG Ido1      | 0.313181 | 0.222332 | 2.561811 | 1.085272 | 0.269268 | 0.470217  |
| ENSMUSG Adam18    | 0.089118 | 0.056992 | 0.079066 | 0.039284 | 0.070217 | 0         |
| ENSMUSG Adam3     | 0.786933 | 0.809391 | 0.974865 | 0.392138 | 0.420415 | 0.304716  |
| ENSMUSG Slc26a6   | 2.163674 | 2.091532 | 2.561481 | 3.058994 | 2.227844 | 3.367074  |
| ENSMUSG Cyp1      | 0        | 0        | 0        | 0        | 0        | 0         |
| ENSMUSG Gm49384   | 0.008743 | 0        | 0.035542 | 0.013687 | 0.027276 | 0.012216  |
| ENSMUSG Med22     | 17.258   | 18.61529 | 19.09594 | 16.46875 | 15.93894 | 16.487243 |
| ENSMUSG Rims2     | 0.523764 | 0.797375 | 0.29499  | 0.454556 | 0.490597 | 0.90989   |
| ENSMUSG Fkbp8     | 85.209   | 87.81343 | 87.35581 | 82.06607 | 81.04401 | 88.666394 |
| ENSMUSG Ffar3     | 0        | 0        | 0        | 0        | 0        | 0.044778  |
| ENSMUSG Dmrtc1b   | 0        | 0        | 0        | 0        | 0        | 0         |
| ENSMUSG Dse       | 7.435189 | 7.504725 | 8.05093  | 10.41421 | 12.46075 | 11.903493 |
| ENSMUSG Cdnf      | 0.711561 | 0.751163 | 0.467953 | 0.516735 | 0.425526 | 0.507628  |
| ENSMUSG Ccdc27    | 0.102612 | 0.075493 | 0.099308 | 0.043233 | 0        | 0.044878  |
| ENSMUSG Igkv4-71  | 0        | 0        | 0        | 2.625125 | 2.729619 | 2.735765  |
| Mus_musc Mus_musc | 1.310752 | 0.70374  | 0.820664 | 0.739077 | 0.582697 | 0.739721  |
| Mus_musc Mus_musc | 0        | 0        | 0        | 0        | 0        | 0.085009  |
| Mus_musc Mus_musc | 0.508333 | 0.218693 | 0.312969 | 0.492496 | 0.243666 | 0.188156  |
| Mus_musc Mus_musc | 0.391798 | 0.161596 | 0.102089 | 0.233824 | 0.153996 | 0.357804  |
| ENSMUSG Cylc2     | 0        | 0        | 0        | 0        | 0        | 0         |
| Mus_musc Mus_musc | 0.853593 | 1.350712 | 1.453468 | 0.645522 | 0.671768 | 0.626553  |
| ENSMUSG Ppp1r3f   | 1.808995 | 1.38415  | 1.241904 | 0.781499 | 1.191007 | 0.935186  |
| ENSMUSG Olfr924   | 0        | 0        | 0        | 0        | 0        | 0         |
| ENSMUSG Nrp2      | 13.59355 | 13.99614 | 13.5358  | 21.20187 | 22.13358 | 22.537491 |
| ENSMUSG Zfp119b   | 2.81873  | 2.889643 | 2.282919 | 3.08402  | 2.239419 | 2.100152  |
| ENSMUSG Olfr183   | 0        | 0        | 0        | 0        | 0        | 0         |
| ENSMUSG BC049352  | 0.086995 | 0.024848 | 0.08299  | 0.098582 | 0.027448 | 0.108749  |
| ENSMUSG 4933402D  | 0.036045 | 0.081456 | 0        | 0.047513 | 0.02931  | 0.0527    |
| ENSMUSG Fastkd2   | 1.81522  | 1.849544 | 1.843686 | 1.992361 | 1.782462 | 2.043334  |
| ENSMUSG Mdh1b     | 1.430745 | 1.506647 | 0.753481 | 2.42833  | 2.027333 | 1.670963  |
| ENSMUSG Adam23    | 1.992751 | 2.513533 | 1.812586 | 2.154948 | 2.013948 | 2.274338  |
| ENSMUSG Eef1b2    | 72.11091 | 70.90423 | 75.02557 | 92.17481 | 87.81372 | 98.277371 |
| ENSMUSG 4930447C  | 0        | 0        | 0        | 0        | 0        | 0         |
| ENSMUSG Six6      | 0        | 0        | 0        | 0        | 0        | 0         |
| ENSMUSG Pri2c3    | 0        | 0.032293 | 0        | 0.085486 | 0.083652 | 0         |
| ENSMUSG Lrrc9     | 0.220924 | 0.329522 | 0.165066 | 0.28293  | 0.327559 | 0.201832  |
| ENSMUSG Serpina3n | 10.67684 | 9.948462 | 14.64375 | 47.00633 | 76.72535 | 51.703777 |
| ENSMUSG Mok       | 2.07738  | 2.096795 | 1.985564 | 3.064189 | 2.866644 | 2.395683  |



|                   |          |          |          |          |          |           |
|-------------------|----------|----------|----------|----------|----------|-----------|
| ENSMUSG Zbtb25    | 2.446808 | 3.016061 | 3.000596 | 3.296799 | 2.515331 | 2.935809  |
| ENSMUSG Dhrr7     | 36.98811 | 32.69911 | 36.46109 | 30.9265  | 32.34444 | 30.353647 |
| ENSMUSG Gsc       | 0        | 0        | 0        | 0        | 0        | 0         |
| ENSMUSG Ppm1a     | 13.07741 | 13.37659 | 12.7418  | 11.27651 | 10.6019  | 11.014834 |
| ENSMUSG Clmn      | 2.161721 | 2.340664 | 1.853789 | 3.255479 | 3.038693 | 3.054444  |
| Mus_musc Mus_musc | 0.402993 | 0        | 0        | 0.352246 | 0        | 0         |
| ENSMUSG Gbp5      | 5.329598 | 4.700527 | 43.86957 | 20.19321 | 5.428252 | 6.441497  |
| Mus_musc Mus_musc | 0        | 0        | 0        | 0        | 0        | 0         |
| Mus_musc Mus_musc | 0        | 0.154309 | 0        | 0        | 0        | 0         |
| Mus_musc Mus_musc | 0.265134 | 0        | 0        | 0        | 0        | 0         |
| Mus_musc Mus_musc | 0        | 0.609115 | 0        | 0        | 0        | 0         |
| Mus_musc Mus_musc | 0.532359 | 0.094083 | 0.070925 | 0        | 0        | 0.218269  |
| ENSMUSG Tigd5     | 1.287336 | 0.924506 | 1.011611 | 0.586457 | 0.626611 | 0.854408  |
| ENSMUSG Chkb      | 9.716232 | 10.228   | 9.675807 | 11.82832 | 8.017824 | 9.526782  |
| ENSMUSG Pdx1      | 0        | 0        | 0        | 0        | 0        | 0         |
| ENSMUSG Pan3      | 11.93086 | 12.47522 | 12.02349 | 10.28879 | 10.39006 | 9.899252  |
| ENSMUSG Lmf2      | 26.47519 | 22.96442 | 25.23041 | 20.56793 | 21.6415  | 21.251905 |
| ENSMUSG Miox      | 0        | 0        | 0        | 0        | 0        | 0         |
| ENSMUSG Usp12     | 21.0677  | 20.63964 | 21.03808 | 18.5853  | 18.34504 | 19.082899 |
| ENSMUSG Polr1d    | 14.38693 | 15.66731 | 18.56208 | 22.9092  | 27.26207 | 18.272264 |
| ENSMUSG Pomp      | 27.35516 | 27.36211 | 33.00223 | 30.55888 | 29.26524 | 28.37396  |
| ENSMUSG Flt1      | 64.51057 | 61.037   | 61.39096 | 34.14052 | 38.63872 | 33.177896 |
| ENSMUSG Mapk8ip2  | 0.050374 | 0.033039 | 0.02924  | 0.043113 | 0.040308 | 0.02745   |
| ENSMUSG Slamf7    | 1.359006 | 1.394188 | 2.186408 | 8.693168 | 7.046458 | 7.509273  |
| ENSMUSG Slc43a2   | 13.30655 | 14.42404 | 11.35925 | 14.83603 | 16.37843 | 22.515513 |
| ENSMUSG Pde4dip   | 9.903606 | 13.45565 | 9.033883 | 11.95963 | 12.53512 | 11.854149 |
| ENSMUSG Enpp6     | 0.610851 | 0.575787 | 0.335153 | 0.141279 | 0.232858 | 0.477726  |
| ENSMUSG Ttc39b    | 5.115963 | 4.401591 | 4.486905 | 5.076111 | 5.378988 | 4.830507  |
| ENSMUSG Mylip     | 18.39171 | 17.71382 | 23.14243 | 16.57443 | 14.58314 | 13.887988 |
| ENSMUSG Fam126b   | 5.218603 | 6.186244 | 4.427859 | 5.280525 | 5.42371  | 5.319975  |
| ENSMUSG Mettl7b   | 0.062095 | 0.113382 | 0        | 0        | 0        | 0.041917  |
| ENSMUSG Rabgef1   | 14.90891 | 15.40722 | 14.87596 | 13.51011 | 12.1494  | 12.067875 |
| ENSMUSG Ctsk      | 13.56426 | 14.49507 | 14.10645 | 158.1059 | 199.1356 | 213.60963 |
| ENSMUSG Myoz2     | 0.731109 | 8.786628 | 1.032218 | 3.497562 | 2.433798 | 1.915896  |
| ENSMUSG Mettl14   | 6.89342  | 5.818893 | 5.601529 | 4.379193 | 4.681699 | 4.266711  |
| ENSMUSG Bnpl      | 2.896351 | 3.464007 | 2.71084  | 3.544368 | 3.599766 | 4.233322  |
| Mus_musc Mus_musc | 0        | 0        | 0        | 0        | 0.150672 | 0         |
| Mus_musc Mus_musc | 0        | 0        | 0        | 0        | 0        | 0         |
| Mus_musc Mus_musc | 1.747666 | 1.194654 | 1.192098 | 1.664643 | 1.301151 | 1.549567  |
| ENSMUSG Grik4     | 0.055544 | 0.033184 | 0.13648  | 0.097838 | 0.015032 | 0.082441  |
| ENSMUSG Sco1      | 2.66296  | 3.522403 | 3.200507 | 3.24675  | 3.017253 | 3.400649  |
| ENSMUSG Ssxa1     | 0        | 0        | 0        | 0        | 0        | 0         |
| ENSMUSG Vmn1r51   | 0        | 0        | 0        | 0        | 0        | 0         |
| ENSMUSG Gpr17     | 0.76745  | 0.489951 | 0.614752 | 0.277412 | 0.267398 | 0.213046  |
| ENSMUSG Pgrmc2    | 23.14863 | 22.63928 | 20.07104 | 18.18941 | 18.88865 | 18.629271 |
| ENSMUSG Ppp1r36   | 2.224878 | 2.208914 | 1.949178 | 3.898651 | 4.427443 | 2.931965  |
| ENSMUSG BC030500  | 0        | 0        | 0        | 0.041308 | 0.069792 | 0         |
| ENSMUSG 1500009L1 | 2.492517 | 1.825193 | 2.378515 | 1.91961  | 2.431972 | 1.869283  |
| ENSMUSG Bves      | 0.126904 | 0.412622 | 0.105237 | 0.204812 | 0.158911 | 0.150495  |
| ENSMUSG Gpr31b    | 0        | 0.071203 | 0.059121 | 0.02618  | 0.105351 | 0.039335  |
| ENSMUSG Bcl3      | 4.939484 | 7.162387 | 11.31857 | 11.2602  | 9.440788 | 10.361855 |
| ENSMUSG Pfn1      | 305.4138 | 295.9369 | 359.9316 | 377.5605 | 368.1755 | 402.09506 |
| ENSMUSG Mterf1b   | 0.318678 | 0.716726 | 0.649811 | 1.083594 | 0.32098  | 0.756941  |
| ENSMUSG Naa40     | 6.661116 | 6.926702 | 6.957952 | 7.912446 | 8.476317 | 8.400256  |
| ENSMUSG Otub1     | 23.59591 | 21.44176 | 22.87271 | 21.04955 | 20.8265  | 21.302992 |
| ENSMUSG Lipo3     | 10.89291 | 10.84974 | 10.43122 | 10.22372 | 9.574727 | 10.638735 |
| ENSMUSG Ifna12    | 0        | 0        | 0        | 0        | 0        | 0         |
| ENSMUSG Olfr726   | 0        | 0        | 0        | 0        | 0        | 0         |
| ENSMUSG Spata31d1 | 0        | 0        | 0        | 0        | 0        | 0         |
| ENSMUSG Lipf      | 0.927764 | 0.471239 | 0.922863 | 0.136278 | 0.21461  | 0.129361  |
| ENSMUSG Vim       | 386.9381 | 345.0542 | 397.7988 | 410.9545 | 439.3568 | 495.40205 |
| ENSMUSG Rsu1      | 52.67553 | 50.88238 | 50.61255 | 39.66397 | 41.08474 | 40.496359 |
| ENSMUSG Cubn      | 0.153955 | 0.081895 | 0.032701 | 0.159955 | 0.142133 | 0.149989  |
| ENSMUSG Tnn       | 12.10307 | 12.77127 | 11.37445 | 5.968916 | 6.228102 | 6.48395   |

|                   |          |          |          |          |          |           |
|-------------------|----------|----------|----------|----------|----------|-----------|
| ENSMUSG Trdmt1    | 3.343068 | 3.678155 | 2.732941 | 2.644273 | 2.560256 | 2.386259  |
| ENSMUSG Rabgap1l  | 41.73713 | 45.13367 | 33.05594 | 38.475   | 36.88388 | 35.945351 |
| ENSMUSG Bicdl2    | 3.104616 | 3.557358 | 2.533259 | 3.330468 | 3.618307 | 3.529715  |
| ENSMUSG Ube2r2    | 19.08797 | 18.96953 | 19.60132 | 17.58245 | 17.59139 | 17.020498 |
| ENSMUSG Armh4     | 0.551532 | 0.555057 | 0.73292  | 0.53464  | 0.562361 | 0.695011  |
| ENSMUSG Tbc1d21   | 0.027237 | 0.05749  | 0.014352 | 0.03852  | 0.03274  | 0.03187   |
| ENSMUSG Gmip      | 5.892637 | 4.902067 | 6.174136 | 7.652205 | 6.688283 | 7.269811  |
| ENSMUSG Rbm43     | 8.902098 | 9.672699 | 9.685181 | 9.864907 | 8.586748 | 9.407815  |
| ENSMUSG Asf1b     | 1.723744 | 1.594529 | 2.279174 | 3.185673 | 4.04213  | 4.798835  |
| ENSMUSG Myl10     | 0        | 0        | 0        | 0        | 0        | 0         |
| ENSMUSG Top1      | 37.56104 | 34.51572 | 30.08325 | 32.50397 | 34.30499 | 32.484844 |
| ENSMUSG Frmd5     | 0.71425  | 2.100034 | 0.644502 | 0.555213 | 0.777658 | 1.010922  |
| ENSMUSG Mrgprb1   | 0.013479 | 0        | 0        | 0.024949 | 0        | 0.013203  |
| ENSMUSG Patl2     | 0        | 0        | 0        | 0        | 0.075713 | 0         |
| ENSMUSG Creb3l1   | 5.281206 | 5.932637 | 4.082537 | 8.303171 | 7.518724 | 9.483753  |
| ENSMUSG Eif3j1    | 8.752752 | 8.625223 | 7.201851 | 5.712507 | 7.649074 | 7.551686  |
| ENSMUSG Ap3b2     | 0        | 0        | 0.01017  | 0        | 0        | 0.026727  |
| ENSMUSG Klhdc8b   | 10.62594 | 8.980676 | 9.946995 | 10.56262 | 7.367749 | 8.414057  |
| ENSMUSG Pecr      | 2.780034 | 2.783728 | 2.53431  | 3.787599 | 3.425722 | 3.005609  |
| ENSMUSG Tmem169   | 0        | 0        | 0        | 0        | 0        | 0.018872  |
| ENSMUSG Tnp1      | 0        | 0        | 0        | 0        | 0        | 0         |
| ENSMUSG Ppm1f     | 44.79061 | 41.84123 | 40.4159  | 27.30049 | 26.52084 | 26.7321   |
| ENSMUSG Cxcr2     | 5.675619 | 5.310995 | 6.198694 | 3.010595 | 3.047792 | 1.998475  |
| ENSMUSG Xrcc5     | 6.491795 | 7.018535 | 5.961694 | 6.048747 | 6.719098 | 6.906155  |
| ENSMUSG Igfbp5    | 95.95351 | 104.687  | 69.19161 | 87.06822 | 58.97937 | 103.39323 |
| ENSMUSG Ulk4      | 1.917616 | 2.374056 | 1.178699 | 2.540631 | 2.148452 | 2.293148  |
| ENSMUSG Padi6     | 0        | 0        | 0        | 0        | 0        | 0         |
| ENSMUSG Tmem179   | 0.041794 | 0.33773  | 0        | 0.042115 | 0.072324 | 0.070656  |
| ENSMUSG Ly9       | 3.074877 | 2.366342 | 4.703569 | 9.078108 | 8.200387 | 9.610356  |
| ENSMUSG Pfdn2     | 14.49879 | 14.63545 | 15.81904 | 12.24277 | 12.4919  | 12.689378 |
| ENSMUSG Nectin4   | 4.43299  | 3.659033 | 3.517065 | 4.631468 | 4.472027 | 4.788274  |
| ENSMUSG Rnf114    | 45.73356 | 45.57481 | 60.56438 | 46.26945 | 45.83564 | 44.33395  |
| Mus_musc Mus_musc | 0        | 0        | 0        | 3.091579 | 1.238572 | 2.841738  |
| ENSMUSG Diaph1    | 37.8777  | 39.10973 | 39.05535 | 36.22381 | 38.95928 | 36.165922 |
| ENSMUSG Tdpoz4    | 0        | 0        | 0        | 0        | 0        | 0         |
| ENSMUSG Mlycd     | 9.787045 | 10.12966 | 10.14633 | 10.03202 | 8.634082 | 10.443828 |
| ENSMUSG Osgin1    | 10.78766 | 14.10507 | 10.54952 | 7.327773 | 7.336451 | 8.900368  |
| ENSMUSG Fbxw16    | 0        | 0        | 0        | 0        | 0        | 0         |
| ENSMUSG Fbxw19    | 0        | 0        | 0        | 0        | 0        | 0         |
| ENSMUSG Fbxw15    | 0        | 0        | 0        | 0        | 0        | 0         |
| ENSMUSG Tmem184l  | 63.62602 | 55.90681 | 62.31409 | 46.0344  | 48.06884 | 47.542898 |
| ENSMUSG Pdcl      | 18.99543 | 15.75938 | 16.3046  | 16.06617 | 14.08489 | 15.431124 |
| ENSMUSG Plac8     | 23.45579 | 18.17373 | 85.49343 | 45.06097 | 22.2876  | 31.486339 |
| ENSMUSG 1700016H  | 0.463573 | 0.12381  | 0.262086 | 0.161687 | 0.200306 | 0.198892  |
| ENSMUSG Slc10a6   | 10.56557 | 13.05682 | 12.28434 | 7.004314 | 7.390565 | 7.192673  |
| ENSMUSG Enoph1    | 10.02999 | 9.466014 | 11.19891 | 9.322013 | 8.628505 | 9.214533  |
| ENSMUSG Hnrnpdl   | 40.45701 | 35.90422 | 41.09728 | 30.20314 | 29.06326 | 27.816337 |
| ENSMUSG Sri       | 53.71114 | 54.21764 | 49.34991 | 48.81002 | 42.74841 | 41.738877 |
| ENSMUSG Dgcr2     | 29.18078 | 30.83252 | 27.94763 | 24.63216 | 25.84123 | 25.748158 |
| ENSMUSG Olfr9     | 0        | 0        | 0        | 0        | 0        | 0         |
| Mus_musc Mus_musc | 0.473097 | 0.140549 | 0.598364 | 1.328795 | 0.846357 | 0.918775  |
| ENSMUSG Edil3     | 5.936083 | 5.743834 | 5.551189 | 2.815939 | 3.384547 | 3.04552   |
| Mus_musc Mus_musc | 0        | 0        | 0        | 0.564728 | 0.299728 | 0.555392  |
| ENSMUSG Diaph2    | 5.700471 | 6.445556 | 4.672528 | 4.688419 | 5.053709 | 5.355067  |
| Mus_musc Mus_musc | 0.041631 | 0.170822 | 0        | 0        | 0        | 0         |
| ENSMUSG Ly6g5c    | 0        | 0        | 0        | 0        | 0        | 0         |
| ENSMUSG Uaca      | 13.26544 | 13.41762 | 14.62035 | 10.96671 | 11.06762 | 11.509063 |
| ENSMUSG Snx2      | 42.48319 | 43.15945 | 46.23929 | 45.09341 | 45.56681 | 45.498119 |
| ENSMUSG Kdelc2    | 12.46465 | 12.55555 | 12.52445 | 10.27457 | 11.06601 | 9.786474  |
| ENSMUSG Gbx2      | 0        | 0        | 0        | 0.024289 | 0.090504 | 0.153819  |
| Mus_musc Mus_musc | 0        | 0.04394  | 0.139391 | 0.419824 | 0.471345 | 0         |
| ENSMUSG Olfr360   | 0        | 0        | 0        | 0        | 0        | 0         |
| ENSMUSG Smn1      | 10.19655 | 10.57511 | 10.92284 | 9.3026   | 10.9803  | 10.358156 |
| Mus_musc Mus_musc | 0        | 0        | 0.095444 | 0.156223 | 0        | 0.259456  |

|                   |          |          |          |          |          |           |
|-------------------|----------|----------|----------|----------|----------|-----------|
| Mus_musc Mus_musc | 0.128625 | 0.55147  | 0.087147 | 0.318443 | 0.106281 | 0         |
| Mus_musc Mus_musc | 0.441086 | 0.310774 | 0.308993 | 0.322007 | 0.188548 | 0.416522  |
| ENSMUSG Vps13c    | 8.513472 | 8.88812  | 6.752642 | 9.97321  | 9.821813 | 10.521336 |
| ENSMUSG Nat14     | 1.687442 | 2.865844 | 3.105895 | 2.526326 | 2.017581 | 2.133222  |
| ENSMUSG Dmtf1     | 9.981328 | 9.005292 | 9.21516  | 8.145153 | 7.560135 | 7.823     |
| ENSMUSG Adrb1     | 21.77942 | 18.30878 | 18.85025 | 11.54598 | 11.34559 | 10.85989  |
| ENSMUSG Sdhaf3    | 0.852079 | 0.788858 | 0.814942 | 0.858286 | 0.726602 | 0.669981  |
| ENSMUSG Elmsan1   | 15.52821 | 14.79171 | 14.40817 | 11.76693 | 12.62223 | 11.714711 |
| ENSMUSG Usp22     | 18.7891  | 15.78644 | 14.29454 | 12.88659 | 12.82023 | 14.517163 |
| ENSMUSG Cpa6      | 0        | 0        | 0        | 0        | 0        | 0         |
| ENSMUSG Ago4      | 5.469825 | 5.118254 | 4.4643   | 3.836941 | 4.03292  | 3.863487  |
| ENSMUSG Cd2bp2    | 19.08046 | 18.24611 | 19.52677 | 21.19787 | 18.49272 | 19.149911 |
| ENSMUSG Mug1      | 0        | 0        | 0        | 0.021694 | 0.00894  | 0.044613  |
| ENSMUSG Adamts14  | 1.212219 | 1.109522 | 3.844317 | 1.556678 | 1.148655 | 1.128212  |
| ENSMUSG Scn8a     | 0.231812 | 0.107633 | 0.123329 | 0.144052 | 0.15734  | 0.046884  |
| ENSMUSG Braf      | 8.063493 | 8.335989 | 7.200347 | 6.69492  | 6.808652 | 6.794994  |
| ENSMUSG Gm12169   | 0        | 0        | 0        | 0        | 0        | 0         |
| ENSMUSG Reg2      | 0        | 0        | 0        | 0        | 0        | 0         |
| ENSMUSG Bbs10     | 0.888147 | 0.83976  | 0.807372 | 1.052658 | 0.874134 | 0.800982  |
| ENSMUSG 1110065P  | 7.396893 | 6.974704 | 6.851725 | 7.122301 | 10.67956 | 8.525877  |
| ENSMUSG Wdr18     | 7.871743 | 8.392179 | 8.131396 | 7.283606 | 7.085813 | 7.615991  |
| ENSMUSG Ndufaf8   | 10.71611 | 11.78273 | 13.54088 | 17.51355 | 14.05001 | 11.699954 |
| ENSMUSG Gm12887   | 0        | 0        | 0        | 0        | 0        | 0         |
| ENSMUSG Tmco2     | 0        | 0        | 0        | 0        | 0        | 0         |
| ENSMUSG Gm12886   | 0        | 0        | 0        | 0        | 0        | 0         |
| ENSMUSG Rprm      | 4.818112 | 4.077887 | 5.427826 | 5.034669 | 5.992185 | 4.41063   |
| Mus_musc Mus_musc | 0.325721 | 0.32606  | 1.046054 | 0.782944 | 0.531929 | 0.243867  |
| Mus_musc Mus_musc | 0        | 0.173691 | 0        | 0        | 0        | 0         |
| Mus_musc Mus_musc | 0.335027 | 0.193335 | 0        | 0.128934 | 0.106889 | 0.051057  |
| Mus_musc Mus_musc | 0.811119 | 0.519731 | 0.692844 | 0.641318 | 0.343009 | 0.532901  |
| Mus_musc Mus_musc | 0.35153  | 0        | 0        | 0        | 0        | 0.095504  |
| Mus_musc Mus_musc | 0        | 0        | 0        | 0        | 0        | 0         |
| Mus_musc Mus_musc | 0        | 0.084628 | 0        | 0.144097 | 0        | 0.131364  |
| Mus_musc Mus_musc | 0        | 0        | 0        | 0        | 0        | 0.284652  |
| Mus_musc Mus_musc | 0        | 0        | 0        | 0.174016 | 0        | 0         |
| Mus_musc Mus_musc | 0        | 0        | 0        | 0        | 0        | 0         |
| ENSMUSG Lman2l    | 8.68161  | 10.68401 | 9.168079 | 9.61078  | 8.871841 | 9.190223  |
| Mus_musc Mus_musc | 0        | 0        | 0        | 0        | 0        | 0         |
| ENSMUSG Rhox2a    | 0        | 0        | 0        | 0        | 0        | 0         |
| Mus_musc Mus_musc | 0        | 0        | 0        | 0.050475 | 0.327699 | 0.130767  |
| Mus_musc Mus_musc | 0        | 0        | 0.443872 | 0        | 0        | 0         |
| Mus_musc Mus_musc | 0        | 0        | 0.168936 | 0        | 0        | 0         |
| Mus_musc Mus_musc | 0.061315 | 1.145434 | 1.743088 | 0.142024 | 0.053341 | 1.722743  |
| Mus_musc Mus_musc | 0        | 0        | 0        | 0        | 0.147922 | 0.353073  |
| Mus_musc Mus_musc | 0        | 0        | 0        | 0        | 0.186692 | 0         |
| ENSMUSG Lgr4      | 1.028264 | 1.243623 | 0.929216 | 1.002777 | 0.940509 | 0.731667  |
| ENSMUSG Olfr768   | 0        | 0        | 0        | 0        | 0        | 0         |
| Mus_musc Mus_musc | 0        | 0        | 0        | 0        | 0        | 0         |
| ENSMUSG Scd4      | 2.521506 | 2.735376 | 2.370892 | 2.428774 | 2.316717 | 2.878096  |
| ENSMUSG Rhox13    | 0        | 0        | 0        | 0        | 0        | 0         |
| ENSMUSG Gm5346    | 0        | 0        | 0        | 0        | 0        | 0         |
| ENSMUSG Eif5a2    | 3.893788 | 3.682734 | 3.799904 | 3.411402 | 3.230628 | 2.724872  |
| ENSMUSG Dcaf5     | 10.40913 | 10.31537 | 10.0968  | 8.93291  | 9.346167 | 9.12077   |
| ENSMUSG Hhex      | 12.53933 | 8.826214 | 12.503   | 9.783367 | 9.676622 | 9.587349  |
| ENSMUSG Pcdh10    | 0.012162 | 0.006754 | 0.050077 | 0.017879 | 0        | 0.017871  |
| ENSMUSG Eif3d     | 39.94272 | 39.86793 | 43.22457 | 37.38875 | 41.75991 | 42.843945 |
| ENSMUSG Slfn14    | 0.152059 | 0.12179  | 0.224595 | 0.171997 | 0.083422 | 0.118583  |
| ENSMUSG Kyat3     | 2.343318 | 3.19268  | 2.812943 | 2.896992 | 2.16147  | 2.191388  |
| ENSMUSG Emp3      | 34.652   | 31.47483 | 41.66588 | 55.2724  | 55.77612 | 63.892257 |
| ENSMUSG Ttc12     | 4.0834   | 3.936864 | 2.911867 | 3.822827 | 3.995978 | 4.155841  |
| ENSMUSG Zdhhc6    | 15.53883 | 15.2288  | 14.054   | 15.38923 | 16.78877 | 17.651726 |
| ENSMUSG Olfr846   | 0        | 0        | 0        | 0        | 0        | 0         |
| ENSMUSG Ccser2    | 27.71505 | 27.51529 | 24.18778 | 20.25099 | 19.91916 | 18.980476 |
| ENSMUSG Map4k3    | 30.15941 | 31.98762 | 30.29455 | 22.70388 | 22.38846 | 21.820989 |

|                   |          |          |          |          |          |           |
|-------------------|----------|----------|----------|----------|----------|-----------|
| ENSMUSG Epc1      | 14.56905 | 14.50852 | 14.36525 | 10.33133 | 11.47318 | 11.276432 |
| ENSMUSG Sos1      | 5.873843 | 5.406613 | 4.360239 | 4.405776 | 4.825763 | 4.723026  |
| ENSMUSG Thumpd2   | 2.704654 | 1.659844 | 1.851474 | 1.960889 | 1.916932 | 2.317254  |
| ENSMUSG Pkdcc     | 5.059779 | 5.327051 | 4.252757 | 6.666541 | 6.80515  | 7.31425   |
| ENSMUSG Tmem178   | 8.406203 | 7.637899 | 9.473574 | 5.171645 | 5.552336 | 3.505295  |
| ENSMUSG Cox7a2l   | 115.9224 | 128.3244 | 115.4361 | 125.8596 | 122.9035 | 123.93545 |
| ENSMUSG 9930022D  | 0        | 0        | 0        | 0.02836  | 0.024216 | 0         |
| ENSMUSG Dsg1b     | 0        | 0.007297 | 0        | 0        | 0.00667  | 0         |
| ENSMUSG Odf1      | 0        | 0        | 0        | 0        | 0        | 0         |
| ENSMUSG D17Wsu92  | 56.42465 | 58.71784 | 60.49933 | 49.26982 | 50.39424 | 50.097318 |
| ENSMUSG Olfr1350  | 0        | 0        | 0        | 0        | 0        | 0         |
| ENSMUSG Elmod3    | 7.129302 | 6.906636 | 6.168996 | 8.051024 | 6.635591 | 6.521567  |
| ENSMUSG 4930550C  | 0.430245 | 0.413279 | 0.517682 | 0.13478  | 0.119314 | 0.155196  |
| ENSMUSG Cyp8b1    | 1.663548 | 1.802728 | 1.651242 | 0.778521 | 1.499379 | 0.681773  |
| ENSMUSG Hamp      | 0.672329 | 4.914942 | 0.329737 | 1.188403 | 0.73176  | 0.903888  |
| Mus_musc Mus_musc | 0        | 0        | 0        | 0        | 0        | 0         |
| Mus_musc Mus_musc | 0        | 0.19443  | 0        | 0        | 0        | 0.064465  |
| Mus_musc Mus_musc | 0.188031 | 0        | 0        | 0        | 0        | 0         |
| Mus_musc Mus_musc | 0        | 0        | 0        | 0        | 0        | 0.230522  |
| Mus_musc Mus_musc | 0.236273 | 0        | 0.482755 | 0.280588 | 0        | 0         |
| ENSMUSG Sgpp2     | 17.87819 | 19.2927  | 16.80908 | 23.16686 | 24.70046 | 25.681732 |
| Mus_musc Mus_musc | 0        | 0        | 0.168936 | 0        | 0        | 0         |
| ENSMUSG Mov10l1   | 0        | 0.036029 | 0.011895 | 0.02021  | 0        | 0         |
| ENSMUSG Ifnl2     | 0        | 0        | 0        | 0        | 0        | 0         |
| ENSMUSG H2afb1    | 0        | 0        | 0        | 0        | 0        | 0         |
| ENSMUSG Trabd     | 25.38535 | 26.87004 | 29.91256 | 32.89158 | 31.91798 | 34.968374 |
| ENSMUSG Ffar2     | 0.321242 | 0.339533 | 0.249307 | 0.624797 | 0.509961 | 0.569358  |
| ENSMUSG Taf7      | 4.044043 | 4.631661 | 4.356271 | 3.604643 | 3.262311 | 3.197154  |
| ENSMUSG Olfr1262  | 0        | 0        | 0        | 0        | 0        | 0         |
| ENSMUSG Mtlm      | 13.02165 | 11.02    | 14.03142 | 12.25726 | 9.648494 | 13.406917 |
| ENSMUSG Frmpd2    | 1.100049 | 1.552031 | 1.02008  | 2.42132  | 1.691998 | 1.786353  |
| Mus_musc Mus_musc | 0        | 0.231464 | 0.185933 | 0        | 0        | 0         |
| Mus_musc Mus_musc | 0        | 0        | 0.194489 | 0        | 0        | 0         |
| Mus_musc Mus_musc | 4.078424 | 3.340038 | 3.200013 | 3.122234 | 4.783206 | 3.439576  |
| Mus_musc Mus_musc | 0        | 0.094435 | 0        | 1.818097 | 1.135466 | 1.309095  |
| Mus_musc Mus_musc | 0.139776 | 0        | 0        | 0        | 0        | 0         |
| Mus_musc Mus_musc | 0.2882   | 0.175582 | 0.350165 | 0.465106 | 0.713091 | 0.69499   |
| Mus_musc Mus_musc | 0.318093 | 0.359852 | 0.299812 | 0        | 0        | 0.149242  |
| ENSMUSG Kcnv2     | 0        | 0        | 0.034297 | 0.02044  | 0.010416 | 0         |
| ENSMUSG Gpr15     | 0.224306 | 0.047009 | 0.192451 | 0.636891 | 0.662655 | 0.659607  |
| ENSMUSG Smgc      | 0        | 0        | 0        | 0        | 0        | 0         |
| ENSMUSG Stk32c    | 2.36825  | 2.753154 | 3.073665 | 2.520236 | 2.632142 | 1.792727  |
| ENSMUSG Lrrc27    | 1.747981 | 1.399649 | 1.536509 | 1.659676 | 0.865659 | 1.114389  |
| ENSMUSG 1700028P  | 2.342378 | 1.445494 | 1.21019  | 2.260807 | 2.651332 | 2.16334   |
| ENSMUSG Det1      | 2.841077 | 3.6188   | 3.052211 | 4.178416 | 3.853493 | 3.411351  |
| Mus_musc Mus_musc | 0        | 0        | 0.098601 | 0.234956 | 0        | 0         |
| Mus_musc Mus_musc | 0        | 0.116186 | 0        | 0        | 0        | 0         |
| Mus_musc Mus_musc | 0.647557 | 0        | 0        | 0        | 0        | 0         |
| Mus_musc Mus_musc | 0.08797  | 0.25798  | 0.362969 | 0.301152 | 0        | 0.128199  |
| ENSMUSG Cat       | 144.1223 | 138.9188 | 113.595  | 102.9082 | 98.69059 | 100.78103 |
| ENSMUSG Sycn      | 0        | 0        | 0        | 0.82157  | 1.11176  | 0.544609  |
| ENSMUSG H2a1e     | 0        | 0        | 0        | 0        | 0        | 0         |
| ENSMUSG Pcdhac1   | 0.694647 | 0.7076   | 0.503307 | 0.25654  | 0.162443 | 0.133434  |
| ENSMUSG Repin1    | 6.352429 | 7.04332  | 7.33491  | 5.860309 | 4.817978 | 5.355226  |
| ENSMUSG Traf7     | 36.53883 | 35.2394  | 37.27059 | 32.38451 | 32.46782 | 33.650986 |
| ENSMUSG Gpr25     | 0.078565 | 0.071495 | 0.115134 | 0.259812 | 0.104007 | 0.156994  |
| ENSMUSG Diexf     | 2.635283 | 2.345837 | 2.428479 | 2.271716 | 1.971492 | 2.275598  |
| ENSMUSG Krtap5-2  | 0        | 0        | 0        | 0        | 0        | 0         |
| ENSMUSG Akr1c20   | 0        | 0        | 0        | 0        | 0        | 0         |
| ENSMUSG AU018091  | 0.082213 | 0.046664 | 0.069161 | 0.089102 | 0.031179 | 0.057461  |
| ENSMUSG Fsd1l     | 2.246813 | 2.690368 | 1.86193  | 2.277373 | 2.230745 | 1.949747  |
| ENSMUSG A030003K  | 0        | 0        | 0.038265 | 0        | 0        | 0.066573  |
| ENSMUSG Mcemp1    | 9.108701 | 8.153086 | 9.442955 | 6.459505 | 6.526942 | 5.69726   |
| ENSMUSG Dedd      | 15.58311 | 16.17915 | 16.57556 | 14.55778 | 13.81331 | 14.169535 |

|                    |          |          |          |          |          |           |
|--------------------|----------|----------|----------|----------|----------|-----------|
| ENSMUSG Ei24       | 36.36496 | 37.33131 | 35.58256 | 33.42539 | 33.85227 | 31.036341 |
| ENSMUSG Zfp512     | 8.713381 | 7.974905 | 7.230647 | 6.3617   | 6.926044 | 7.145007  |
| ENSMUSG Shisa1     | 0.405045 | 0.278054 | 0.589168 | 0.641804 | 0.871525 | 0.982721  |
| ENSMUSG Slain2     | 28.71459 | 28.92991 | 27.3378  | 20.82208 | 22.26793 | 21.56598  |
| ENSMUSG Zranb3     | 0.93386  | 0.89967  | 0.774094 | 2.785164 | 2.391273 | 3.367997  |
| ENSMUSG Slc17a3    | 0        | 0        | 0        | 0        | 0        | 0         |
| ENSMUSG Sema5a     | 4.075887 | 6.799808 | 5.154504 | 4.867904 | 6.043541 | 3.935032  |
| ENSMUSG Chst8      | 11.74922 | 9.659721 | 10.29197 | 7.39198  | 6.917259 | 5.738232  |
| ENSMUSG Olfr1369-r | 0        | 0        | 0        | 0        | 0        | 0         |
| ENSMUSG Cyp2a12    | 0        | 0.06646  | 0        | 0.024224 | 0.03243  | 0         |
| ENSMUSG Olfr1411   | 0        | 0        | 0        | 0        | 0        | 0         |
| ENSMUSG Trpc2      | 0        | 0        | 0        | 0        | 0        | 0         |
| ENSMUSG Ppp3r1     | 42.23466 | 38.66232 | 37.43179 | 34.18288 | 38.69867 | 35.803806 |
| ENSMUSG Cmb1       | 7.475721 | 6.44681  | 7.522214 | 11.39046 | 10.39243 | 9.470655  |
| ENSMUSG Ankrd33b   | 28.98564 | 29.90937 | 30.03467 | 20.06026 | 19.67966 | 17.74174  |
| ENSMUSG Adgrb3     | 0        | 0        | 0        | 0        | 0.00891  | 0         |
| ENSMUSG Rbfox2     | 20.44765 | 18.34245 | 16.60887 | 14.01708 | 15.40781 | 13.532019 |
| ENSMUSG Defa2      | 0        | 0        | 0        | 0        | 0        | 0         |
| ENSMUSG Ak9        | 0.75612  | 0.854282 | 0.323786 | 0.823605 | 0.937132 | 1.268646  |
| ENSMUSG Dnaaf3     | 1.747078 | 2.578136 | 1.614885 | 2.968576 | 2.419575 | 3.308681  |
| ENSMUSG Gm5916     | 0        | 0        | 0        | 0        | 0        | 0         |
| ENSMUSG Fmn1       | 16.31377 | 13.39674 | 21.45487 | 19.06388 | 17.85889 | 18.341608 |
| ENSMUSG Gm3164     | 0        | 0.022135 | 0        | 0        | 0        | 0         |
| ENSMUSG Retreg2    | 31.70298 | 32.40633 | 32.93753 | 28.83659 | 33.00709 | 30.056739 |
| ENSMUSG Tenm2      | 0        | 0.004672 | 0.004723 | 0.010538 | 0        | 0.005577  |
| ENSMUSG Olfr902    | 0        | 0        | 0        | 0        | 0        | 0         |
| ENSMUSG Gm12800    | 0        | 0        | 0        | 0        | 0        | 0         |
| ENSMUSG Zfp146     | 18.59658 | 19.28189 | 20.12884 | 17.8144  | 16.13035 | 17.398201 |
| ENSMUSG Ino80b     | 10.14267 | 9.128428 | 10.48839 | 12.06653 | 12.34296 | 9.501432  |
| ENSMUSG Wbp1       | 28.45103 | 30.41701 | 34.04737 | 34.93863 | 32.21429 | 35.008407 |
| ENSMUSG Mogs       | 9.948148 | 9.858641 | 10.71353 | 11.1463  | 10.35108 | 11.931028 |
| ENSMUSG Mrp153     | 17.52689 | 19.55209 | 25.99092 | 26.81354 | 24.31493 | 29.951805 |
| ENSMUSG Mmaa       | 6.796697 | 8.089449 | 6.278557 | 5.759283 | 4.923296 | 5.31056   |
| ENSMUSG Kbtbd8     | 1.187854 | 1.263568 | 1.135837 | 1.273188 | 1.093084 | 1.101259  |
| ENSMUSG Wdr62      | 1.87746  | 1.939156 | 1.695541 | 1.352635 | 2.206559 | 1.716493  |
| ENSMUSG Lmbr1      | 3.886881 | 4.37076  | 4.016603 | 3.645372 | 3.62341  | 3.717129  |
| ENSMUSG Dcakd      | 12.40139 | 12.35931 | 13.44119 | 12.26188 | 13.31014 | 14.594288 |
| ENSMUSG Nmt1       | 21.84298 | 22.20952 | 20.99037 | 21.26459 | 23.14655 | 22.358812 |
| ENSMUSG Plcd3      | 2.544477 | 3.08403  | 3.834164 | 2.920879 | 2.258022 | 3.135182  |
| ENSMUSG Ccdc103    | 0.939238 | 1.178969 | 0.62124  | 1.679459 | 1.980937 | 1.084538  |
| ENSMUSG Gfap       | 0.287832 | 0.163518 | 0.0793   | 0.067885 | 0.079598 | 0.111424  |
| ENSMUSG Gm6482     | 0        | 0        | 0        | 0        | 0        | 0         |
| ENSMUSG Gm8005     | 0        | 0        | 0        | 0        | 0        | 0         |
| ENSMUSG Pstk       | 6.926415 | 8.191273 | 7.152467 | 6.090691 | 6.990538 | 5.737999  |
| ENSMUSG Samd4b     | 21.41422 | 21.46931 | 20.47661 | 17.21051 | 17.50208 | 18.283132 |
| ENSMUSG Gm10665    | 0        | 0        | 0        | 0        | 0        | 0         |
| ENSMUSG Scgb2a2    | 0        | 0        | 0        | 0        | 0        | 0         |
| ENSMUSG Olfr811    | 0        | 0        | 0        | 0        | 0        | 0         |
| ENSMUSG Hspb11     | 6.723778 | 9.190175 | 9.611007 | 9.525317 | 7.25087  | 7.979561  |
| ENSMUSG Gm21083    | 0        | 0.029888 | 0        | 0.655649 | 0.934607 | 0.575078  |
| ENSMUSG Gm4858     | 0        | 0        | 0        | 0        | 0        | 0         |
| ENSMUSG Kik1b27    | 0        | 0        | 0        | 0        | 0.410975 | 0.192681  |
| ENSMUSG Olfr955    | 0        | 0        | 0        | 0        | 0        | 0         |
| ENSMUSG Uhrf1bp1   | 2.266888 | 2.561108 | 2.293953 | 2.68611  | 2.618212 | 2.978494  |
| ENSMUSG Ptpa       | 39.00322 | 37.41694 | 39.78465 | 38.20499 | 39.51918 | 42.806125 |
| ENSMUSG Gm17455    | 0.024326 | 0.179128 | 0        | 0.174932 | 0.07942  | 0.128802  |
| ENSMUSG Vmn2r75    | 0        | 0        | 0        | 0        | 0        | 0         |
| ENSMUSG Cyp7b1     | 0.975402 | 1.243807 | 1.042631 | 1.882363 | 2.850549 | 1.906574  |
| ENSMUSG Ide        | 12.25287 | 12.44784 | 11.01178 | 12.03607 | 13.44531 | 12.589684 |
| ENSMUSG Vmn1r25    | 0        | 0        | 0        | 0        | 0        | 0         |
| ENSMUSG Olfr996    | 0        | 0        | 0        | 0        | 0        | 0         |
| ENSMUSG Olfr702    | 0        | 0        | 0        | 0        | 0        | 0         |
| ENSMUSG Cyb5r2     | 0.040682 | 0.170502 | 0.0572   | 0.126054 | 0.102977 | 0.116257  |
| ENSMUSG Olfr1349   | 0        | 0        | 0        | 0        | 0        | 0         |

|                   |          |          |          |          |          |           |
|-------------------|----------|----------|----------|----------|----------|-----------|
| ENSMUSG Fpr-rs4   | 0        | 0        | 0        | 0        | 0        | 0         |
| ENSMUSG Olfr1240  | 0        | 0        | 0        | 0        | 0        | 0         |
| Mus_musc Mus_musc | 0.166926 | 0.700705 | 0.036132 | 0.37734  | 0.280471 | 0.766433  |
| ENSMUSG Yars2     | 4.327438 | 3.183459 | 3.899945 | 4.553172 | 4.683553 | 3.768399  |
| ENSMUSG B4galt4   | 32.72137 | 30.07752 | 29.62219 | 17.0759  | 17.33359 | 15.624772 |
| ENSMUSG lgsf11    | 0.25668  | 0.428299 | 0.1025   | 0.234119 | 0.303165 | 0.327395  |
| ENSMUSG Tnk2      | 11.7814  | 11.86334 | 12.14078 | 10.78357 | 10.05199 | 11.230392 |
| ENSMUSG Fgf15     | 0        | 0        | 0        | 0        | 0        | 0         |
| ENSMUSG LTO1      | 9.968844 | 10.59571 | 11.90371 | 9.757122 | 10.339   | 9.949074  |
| ENSMUSG Mrgprf    | 2.106008 | 2.334602 | 2.077502 | 1.462878 | 1.213366 | 1.746059  |
| ENSMUSG 4930435E1 | 0        | 0        | 0        | 0        | 0        | 0         |
| ENSMUSG Arhgap31  | 66.50456 | 61.28038 | 57.3075  | 37.73372 | 41.78985 | 36.160816 |
| ENSMUSG Zfp300    | 0.362105 | 0.345414 | 0.275022 | 0.276083 | 0.303284 | 0.321471  |
| ENSMUSG Cttt      | 41.46636 | 40.94079 | 41.36055 | 34.17747 | 34.72585 | 36.222784 |
| ENSMUSG Il1rl2    | 4.265943 | 4.025491 | 2.907785 | 6.115433 | 5.968619 | 6.038313  |
| ENSMUSG Olfr356   | 0        | 0        | 0        | 0        | 0        | 0         |
| ENSMUSG Trim63    | 0.132998 | 0.375587 | 0        | 0        | 0.115421 | 0         |
| ENSMUSG Psmb2     | 48.28862 | 48.2353  | 57.14838 | 56.60054 | 51.43591 | 57.926216 |
| ENSMUSG Slc30a2   | 0.438747 | 0.31826  | 0.416234 | 0.322645 | 0.238324 | 0.592626  |
| ENSMUSG AU040320  | 13.56234 | 13.23992 | 13.85837 | 14.85428 | 14.5313  | 16.307457 |
| ENSMUSG Ncdn      | 8.783905 | 6.805354 | 8.080727 | 7.326516 | 7.342011 | 7.130242  |
| ENSMUSG Stmn1     | 70.70761 | 82.85518 | 74.8988  | 53.7294  | 53.10214 | 54.15361  |
| ENSMUSG Ankrd12   | 8.384333 | 8.279273 | 6.912684 | 6.557159 | 6.073525 | 5.799642  |
| ENSMUSG Zyg11a    | 0        | 0        | 0        | 0        | 0        | 0         |
| ENSMUSG Extl1     | 0.555572 | 0.568543 | 0.476346 | 0.339302 | 0.377231 | 0.431583  |
| ENSMUSG Cd300ld   | 1.211221 | 0.920547 | 2.7474   | 3.532692 | 2.17036  | 2.809241  |
| ENSMUSG Tiparp    | 10.71349 | 12.50888 | 9.788588 | 9.128395 | 9.900441 | 9.067272  |
| ENSMUSG Lbx2      | 0.609894 | 1.326644 | 1.099016 | 1.089892 | 0.963854 | 0.637776  |
| ENSMUSG Aggf1     | 21.742   | 21.12745 | 20.45194 | 18.15544 | 16.49917 | 16.936008 |
| ENSMUSG Crhbp     | 0        | 0        | 0        | 0        | 0        | 0         |
| ENSMUSG Otp       | 0        | 0        | 0        | 0        | 0        | 0         |
| ENSMUSG Pde8b     | 18.23095 | 17.2846  | 17.17452 | 12.94892 | 12.5879  | 9.889966  |
| ENSMUSG Scamp1    | 20.26451 | 19.41819 | 17.26703 | 15.91826 | 16.96429 | 17.140453 |
| ENSMUSG Ap3b1     | 16.05263 | 18.52276 | 16.33654 | 18.36271 | 19.51417 | 18.957378 |
| ENSMUSG Enpp2     | 26.12484 | 24.72011 | 23.79718 | 17.94754 | 19.45387 | 18.61294  |
| ENSMUSG Josd1     | 9.047537 | 10.04282 | 9.591767 | 9.457778 | 9.446959 | 9.25477   |
| ENSMUSG Tomm22    | 19.90604 | 20.7603  | 22.40431 | 20.49898 | 19.99114 | 20.872836 |
| ENSMUSG Dnal4     | 17.83417 | 18.90122 | 16.96305 | 16.87001 | 16.12678 | 16.283147 |
| ENSMUSG Nptxr     | 0.780636 | 1.255091 | 1.071009 | 0.923573 | 1.043296 | 0.932569  |
| ENSMUSG Dscc1     | 0.132276 | 0.184468 | 0.490657 | 0.493564 | 0.718523 | 0.493334  |
| ENSMUSG Cby1      | 14.57731 | 16.78022 | 14.91705 | 16.15149 | 16.63946 | 14.285435 |
| ENSMUSG Dmc1      | 0.111235 | 0.19798  | 0.13323  | 0        | 0.123592 | 0.054534  |
| ENSMUSG Sgtb      | 4.325021 | 5.348402 | 5.37896  | 3.393372 | 3.408522 | 3.191746  |
| ENSMUSG Mrpl55    | 11.94957 | 9.155479 | 10.41845 | 12.29772 | 11.10723 | 11.054623 |
| ENSMUSG Syde2     | 7.309352 | 8.05083  | 6.080053 | 4.533496 | 4.981629 | 4.952511  |
| ENSMUSG Dchs1     | 4.177547 | 3.402727 | 3.325046 | 3.206839 | 2.874227 | 3.643136  |
| ENSMUSG Krtcap2   | 28.74501 | 28.8228  | 32.82653 | 37.17878 | 31.73308 | 35.82968  |
| ENSMUSG Proser3   | 1.764483 | 2.001023 | 1.806807 | 1.99467  | 2.123635 | 1.664625  |
| ENSMUSG Id1       | 200.9536 | 143.4913 | 200.1669 | 77.73053 | 79.20081 | 79.486011 |
| ENSMUSG Hectd4    | 5.831962 | 6.069451 | 5.222882 | 4.855672 | 5.230893 | 5.658587  |
| ENSMUSG Tdrd7     | 16.17498 | 14.53235 | 16.78684 | 13.19741 | 11.45953 | 13.231513 |
| ENSMUSG Ntng2     | 10.08028 | 8.562388 | 10.84482 | 10.89406 | 11.42965 | 10.798864 |
| ENSMUSG Xbp1      | 95.89538 | 85.93035 | 94.25616 | 179.9651 | 200.9986 | 169.02435 |
| ENSMUSG Supt4a    | 34.63887 | 38.92085 | 42.84426 | 38.91249 | 40.81536 | 37.683612 |
| ENSMUSG 4-Sep     | 104.7014 | 94.92376 | 123.9508 | 73.11782 | 69.58481 | 70.781494 |
| ENSMUSG Ankrd36   | 0        | 0        | 0        | 0        | 0        | 0         |
| ENSMUSG Ccdc117   | 15.80792 | 21.38659 | 18.82057 | 15.03821 | 15.73923 | 18.110643 |
| ENSMUSG Dynll2    | 75.29593 | 69.24696 | 71.75019 | 52.05496 | 54.605   | 57.79595  |
| ENSMUSG Chmp2a    | 89.08507 | 83.57492 | 92.15393 | 76.10279 | 74.02812 | 78.48123  |
| ENSMUSG Gde1      | 76.80074 | 80.34886 | 70.86084 | 72.42157 | 74.72432 | 77.664802 |
| ENSMUSG Rnf20     | 21.18207 | 21.25202 | 20.68819 | 18.23162 | 18.50806 | 19.566896 |
| ENSMUSG Gucy1a1   | 54.81903 | 52.38296 | 52.19374 | 32.86393 | 31.96128 | 24.744171 |
| ENSMUSG C9orf72   | 4.614901 | 5.658169 | 5.251343 | 5.803338 | 5.766375 | 6.324871  |
| ENSMUSG Aldob     | 0.237091 | 0        | 0.022039 | 0        | 0.050933 | 0         |

|                   |          |          |          |          |          |           |
|-------------------|----------|----------|----------|----------|----------|-----------|
| ENSMUSG Parl      | 16.26296 | 13.76703 | 16.79592 | 17.08567 | 16.63409 | 15.597405 |
| ENSMUSG Gabrp     | 21.26145 | 25.64566 | 14.33235 | 23.65849 | 24.96388 | 24.059881 |
| ENSMUSG Mum1      | 16.6779  | 17.06086 | 18.94016 | 12.27198 | 11.13392 | 12.013455 |
| ENSMUSG Ptprb     | 143.5706 | 138.6451 | 114.749  | 86.88595 | 102.0045 | 92.265947 |
| ENSMUSG Kcnmb1    | 0.97098  | 0.885281 | 1.039899 | 0.951753 | 1.17521  | 0.833035  |
| ENSMUSG Actr2     | 70.61171 | 66.85862 | 71.76167 | 76.77424 | 74.63257 | 75.071213 |
| ENSMUSG Ndufs7    | 53.09167 | 57.12402 | 62.20647 | 57.70098 | 53.15896 | 58.580468 |
| ENSMUSG Gamt      | 7.276183 | 6.50209  | 6.790105 | 4.898041 | 6.4384   | 7.812629  |
| ENSMUSG Ptpr      | 0.830503 | 0.939969 | 0.750807 | 0.27355  | 0.279548 | 0.329591  |
| ENSMUSG Amd1      | 22.81955 | 26.89647 | 23.33256 | 17.77436 | 18.19749 | 20.851181 |
| ENSMUSG Ybx2      | 0        | 0.232063 | 0.068362 | 0.404304 | 0.734802 | 0.418905  |
| ENSMUSG Ctdnep1   | 29.33599 | 30.78573 | 33.28165 | 32.36141 | 34.25747 | 34.087994 |
| ENSMUSG 2310057M  | 2.037194 | 1.910374 | 2.144059 | 1.350313 | 1.225626 | 1.253759  |
| ENSMUSG Slc15a5   | 0        | 0        | 0        | 0.104084 | 0        | 0         |
| ENSMUSG Olfr720   | 0        | 0        | 0        | 0        | 0        | 0         |
| ENSMUSG Gm28047   | 0        | 0.160626 | 0        | 0.278594 | 0.170639 | 0         |
| ENSMUSG Tchh      | 1.243145 | 1.279868 | 1.275144 | 1.333496 | 1.137788 | 0.787418  |
| ENSMUSG 2610001J0 | 16.82412 | 13.15882 | 20.06017 | 11.56173 | 13.62088 | 12.34035  |
| ENSMUSG Pcare     | 0        | 0.016616 | 0        | 0.020819 | 0.011168 | 0         |
| ENSMUSG Gm13097   | 0        | 0        | 0        | 0        | 0        | 0         |
| ENSMUSG Skint6    | 0        | 0        | 0        | 0        | 0        | 0         |
| Mus_musc Mus_musc | 0.264942 | 0.422831 | 0.360083 | 0.478063 | 0.295865 | 0.199107  |
| ENSMUSG Gm5475    | 0.113986 | 0.063784 | 0.052886 | 0        | 0.212422 | 0.088455  |
| ENSMUSG Ifnb1     | 0        | 0        | 0.010136 | 0        | 0        | 0         |
| ENSMUSG Slc35e4   | 9.030303 | 10.29102 | 9.980071 | 8.216418 | 9.521832 | 8.772537  |
| ENSMUSG Mecom     | 13.54762 | 16.44205 | 12.52059 | 12.99108 | 13.02029 | 12.763776 |
| ENSMUSG Fxr1      | 25.20576 | 31.37631 | 29.23312 | 28.28447 | 25.69105 | 30.037688 |
| ENSMUSG Dhcr7     | 5.727212 | 5.754595 | 6.496908 | 16.28333 | 15.28798 | 17.07148  |
| ENSMUSG Ap3s1     | 12.29174 | 11.17588 | 12.06202 | 16.45349 | 18.54358 | 18.668596 |
| ENSMUSG Lvrn      | 0.391645 | 0.728878 | 0.420286 | 0.823628 | 0.366821 | 0.679185  |
| ENSMUSG Cnbd1     | 0        | 0        | 0        | 0        | 0        | 0         |
| ENSMUSG Slc4a9    | 0.012027 | 0        | 0        | 0        | 0        | 0.013841  |
| ENSMUSG Hbegf     | 17.3088  | 13.46379 | 17.80846 | 9.783917 | 9.806265 | 9.572949  |
| ENSMUSG Yipf5     | 18.35656 | 19.22545 | 18.21674 | 19.70335 | 20.13965 | 20.189629 |
| ENSMUSG Olfr520   | 0        | 0        | 0        | 0        | 0        | 0         |
| ENSMUSG Olfr862   | 0        | 0        | 0        | 0        | 0        | 0         |
| ENSMUSG Mycbp2    | 14.30655 | 13.05262 | 14.26094 | 12.45511 | 12.11495 | 11.901931 |
| ENSMUSG Sox10     | 0.047269 | 0.218475 | 0.123542 | 0.028168 | 0.078642 | 0.057906  |
| ENSMUSG Asic4     | 0        | 0        | 0        | 0        | 0.035498 | 0.061603  |
| ENSMUSG Ogfod1    | 7.057686 | 7.273299 | 7.187549 | 5.816236 | 6.315809 | 5.924554  |
| Mus_musc Mus_musc | 0        | 0.026472 | 0        | 0        | 0.069528 | 0.178387  |
| ENSMUSG Tmem249   | 0        | 0        | 0        | 0        | 0        | 0         |
| ENSMUSG Hapln3    | 0.62972  | 0.620821 | 0.42883  | 0.493236 | 0.555796 | 0.443023  |
| ENSMUSG Gcat      | 0.034942 | 0        | 0.079527 | 0        | 0        | 0         |
| ENSMUSG Kctd8     | 0.927753 | 1.300159 | 0.708184 | 0.742384 | 0.705435 | 0.999814  |
| ENSMUSG Zfp87     | 5.046795 | 4.888631 | 4.756046 | 4.900858 | 5.655207 | 4.814729  |
| Mus_musc Mus_musc | 0        | 0        | 0        | 0        | 0        | 0         |
| ENSMUSG Tonsl     | 1.018285 | 1.036336 | 1.572379 | 1.526499 | 1.422601 | 2.020321  |
| ENSMUSG Fzd3      | 1.257362 | 1.532926 | 0.95547  | 1.048566 | 1.135592 | 1.140497  |
| ENSMUSG Hopx      | 498.7941 | 523.1649 | 548.914  | 307.1281 | 307.4188 | 263.94993 |
| ENSMUSG Eda       | 0.881188 | 1.061597 | 0.748297 | 0.61361  | 0.788144 | 0.56436   |
| ENSMUSG Csf2ra    | 18.86238 | 16.56809 | 22.57449 | 44.56671 | 20.65444 | 48.300724 |
| ENSMUSG Lrfn1     | 1.152588 | 0.967296 | 1.255559 | 0.946762 | 1.301006 | 0.761964  |
| ENSMUSG Nbdy      | 21.34549 | 17.43469 | 16.34102 | 13.34264 | 14.31479 | 14.036023 |
| Mus_musc Mus_musc | 0        | 0        | 0        | 0.117823 | 0        | 0.183707  |
| ENSMUSG Gm3233    | 0        | 0        | 0        | 0        | 0        | 0         |
| ENSMUSG Cphx2     | 0.026734 | 0        | 0        | 0.011215 | 0        | 0         |
| ENSMUSG Gm13698   | 0        | 0        | 0        | 0        | 0        | 0         |
| ENSMUSG G530012D  | 0        | 0        | 0        | 0        | 0        | 0         |
| ENSMUSG Olfr914   | 0        | 0        | 0        | 0        | 0        | 0         |
| ENSMUSG Teddm1a   | 0.021416 | 0.01488  | 0.026809 | 0        | 0.039692 | 0         |
| ENSMUSG AU015836  | 0.089843 | 0.053496 | 0.072433 | 0.048251 | 0.105088 | 0.213317  |
| Mus_musc Mus_musc | 0.672739 | 0.716183 | 0.376604 | 0.493152 | 0.595125 | 0.380959  |
| ENSMUSG Tmem213   | 0.763872 | 0.741121 | 1.214616 | 3.197521 | 4.065546 | 4.131118  |

|                   |          |          |          |          |          |           |
|-------------------|----------|----------|----------|----------|----------|-----------|
| ENSMUSG 4921507P  | 0.446753 | 0.552801 | 0.45332  | 0.343517 | 0.199426 | 0.256461  |
| Mus_musc Mus_musc | 0.14198  | 0.054743 | 0.073678 | 0.620356 | 0.573903 | 0.809167  |
| Mus_musc Mus_musc | 0        | 0.40608  | 0.09833  | 0.219301 | 0        | 0         |
| ENSMUSG Zc3hav1   | 26.60586 | 24.22164 | 26.52775 | 22.23869 | 24.29244 | 23.44061  |
| ENSMUSG Gsdme     | 0.735645 | 0.64352  | 0.609216 | 0.566444 | 0.754287 | 0.61572   |
| ENSMUSG Luc7l2    | 45.7608  | 49.44173 | 50.93269 | 44.28705 | 37.59217 | 38.087185 |
| ENSMUSG Osbp13    | 5.752319 | 6.584916 | 6.42167  | 6.928159 | 5.941369 | 6.041172  |
| ENSMUSG Gtf2h1    | 13.89216 | 14.31809 | 14.66875 | 14.8987  | 14.82804 | 15.643351 |
| ENSMUSG Nat8f7    | 1.677837 | 2.210577 | 2.710167 | 1.413187 | 1.245212 | 1.299951  |
| ENSMUSG Gm4778    | 0        | 0        | 0        | 0        | 0        | 0         |
| ENSMUSG Spin2g    | 0        | 0        | 0        | 0        | 0        | 0         |
| ENSMUSG Vmn2r-ps  | 0        | 0        | 0        | 0        | 0        | 0         |
| ENSMUSG Gm20854   | 0        | 0        | 0        | 0        | 0        | 0         |
| ENSMUSG Gm21818   | 0        | 0        | 0        | 0        | 0        | 0         |
| ENSMUSG H2a1f     | 0        | 0        | 0        | 0        | 0        | 0         |
| ENSMUSG Plscr5    | 0        | 0        | 0        | 0        | 0        | 0         |
| Mus_musc Mus_musc | 0.52876  | 0.803169 | 0.650933 | 1.414246 | 1.290563 | 1.70709   |
| Mus_musc Mus_musc | 0.821207 | 0.466688 | 0.557777 | 0.134235 | 0        | 0         |
| Mus_musc Mus_musc | 0.225007 | 0.201943 | 0.266409 | 0.157835 | 0.143861 | 0.377217  |
| Mus_musc Mus_musc | 0.122073 | 0.200521 | 0        | 0.236152 | 0.199204 | 0.320542  |
| Mus_musc Mus_musc | 0        | 0        | 0        | 0        | 0.560077 | 0         |
| Mus_musc Mus_musc | 0        | 0.133511 | 0        | 0.223898 | 0.196746 | 0         |
| Mus_musc Mus_musc | 0        | 0        | 0.101089 | 0        | 0        | 0         |
| Mus_musc Mus_musc | 0        | 0        | 0        | 0        | 0        | 0         |
| Mus_musc Mus_musc | 1.315568 | 1.390885 | 1.621519 | 1.914608 | 1.838081 | 1.730183  |
| Mus_musc Mus_musc | 0.803998 | 1.09514  | 1.167023 | 0.849519 | 1.175397 | 0.730593  |
| Mus_musc Mus_musc | 0        | 0        | 0.445229 | 0        | 0        | 0         |
| ENSMUSG Gm9046    | 0.007617 | 0.014169 | 0.023499 | 0.003848 | 0.025588 | 0.00538   |
| Mus_musc Mus_musc | 0.761867 | 0.824384 | 0.979764 | 0.24105  | 0.740958 | 0         |
| Mus_musc Mus_musc | 0        | 0        | 0        | 0        | 0        | 0.184186  |
| Mus_musc Mus_musc | 0.363298 | 0.336051 | 0.363151 | 0.757722 | 0.617471 | 1.194413  |
| ENSMUSG Gm15155   | 0        | 0        | 0        | 0        | 0        | 0         |
| Mus_musc Mus_musc | 0.408166 | 0.186927 | 0.110793 | 0.079227 | 0        | 0.177198  |
| Mus_musc Mus_musc | 0        | 0        | 0        | 0        | 0.299148 | 0.359421  |
| Mus_musc Mus_musc | 1.016042 | 1.038072 | 0.923126 | 1.253384 | 0.892392 | 1.071246  |
| Mus_musc Mus_musc | 0.021346 | 0.846757 | 0.31448  | 0.527186 | 0.015795 | 0.267371  |
| Mus_musc Mus_musc | 0.159133 | 0.232081 | 0.305286 | 0.424445 | 0.321775 | 0.114605  |
| Mus_musc Mus_musc | 2.671262 | 2.440749 | 2.038414 | 2.273822 | 2.219714 | 1.5108    |
| Mus_musc Mus_musc | 0.416425 | 0.283935 | 0.350948 | 0.348212 | 0.248538 | 0.190649  |
| Mus_musc Mus_musc | 1.913538 | 1.963655 | 1.676675 | 1.464651 | 1.395974 | 1.2679    |
| ENSMUSG Marcksl1  | 10.87841 | 8.37183  | 9.04698  | 11.25511 | 12.09144 | 13.132315 |
| Mus_musc Mus_musc | 0        | 0        | 0        | 0        | 0        | 0         |
| Mus_musc Mus_musc | 0.327237 | 0        | 0        | 0        | 0.238952 | 0         |
| ENSMUSG Stpg2     | 0        | 0        | 0        | 0        | 0        | 0         |
| Mus_musc Mus_musc | 1.780608 | 2.237948 | 1.152255 | 1.585291 | 1.089688 | 1.43428   |
| ENSMUSG Vmn1r152  | 0        | 0        | 0        | 0        | 0        | 0         |
| ENSMUSG Adam5     | 0.328027 | 0.320174 | 0.255371 | 0.498598 | 0.374589 | 0.328084  |
| ENSMUSG Gm17662   | 0        | 0        | 0        | 0        | 0        | 0         |
| Mus_musc Mus_musc | 0        | 0        | 0.168936 | 0        | 0        | 0         |
| Mus_musc Mus_musc | 0.170115 | 0        | 0.051817 | 0.406018 | 0.523588 | 0.36804   |
| Mus_musc Mus_musc | 0.063761 | 0.063806 | 0        | 0.509002 | 0.351205 | 0.495731  |
| Mus_musc Mus_musc | 0.141109 | 0.020005 | 0.077733 | 0.499913 | 0.301458 | 0.47375   |
| ENSMUSG Gm10681   | 0        | 0.019137 | 0.057559 | 0.01297  | 0        | 0         |
| ENSMUSG Gm3453    | 0        | 0        | 0        | 0        | 0        | 0         |
| Mus_musc Mus_musc | 0        | 0.154309 | 0        | 0        | 0        | 0         |
| ENSMUSG Dnajc11   | 10.72074 | 9.586672 | 10.34386 | 9.219014 | 9.380423 | 9.593266  |
| ENSMUSG Cpne2     | 4.301796 | 3.751154 | 3.583262 | 6.238934 | 6.475025 | 5.742072  |
| ENSMUSG Csta1     | 0        | 0        | 0        | 0        | 0        | 0         |
| ENSMUSG Hpcal4    | 1.59118  | 2.429092 | 1.766001 | 0.984987 | 0.908644 | 1.264295  |
| ENSMUSG Thbd      | 306.4703 | 308.9363 | 334.0801 | 162.1586 | 199.2475 | 164.6049  |
| ENSMUSG Pdzd8     | 12.97806 | 13.32785 | 11.25045 | 10.16631 | 11.00422 | 10.966383 |
| ENSMUSG Mosmo     | 11.43507 | 12.1941  | 10.35955 | 7.818653 | 7.766323 | 6.664113  |
| ENSMUSG Krt32     | 0        | 0        | 0        | 0        | 0        | 0         |
| ENSMUSG Atxn7l3b  | 41.2227  | 40.38809 | 37.29277 | 31.81573 | 33.16721 | 29.919161 |



|                   |          |          |          |          |          |           |
|-------------------|----------|----------|----------|----------|----------|-----------|
| ENSMUSG Kiz       | 14.82071 | 16.72275 | 14.01489 | 18.15962 | 17.45172 | 17.224839 |
| ENSMUSG Spaca6    | 3.119983 | 1.865736 | 3.358202 | 1.814081 | 1.387606 | 2.239731  |
| Mus_musc Mus_musc | 0        | 0.093203 | 0        | 0        | 0.186692 | 0         |
| Mus_musc Mus_musc | 0.159596 | 0.287175 | 0.077563 | 0.052869 | 0.249771 | 0.191714  |
| Mus_musc Mus_musc | 0.68714  | 0.623555 | 0.744298 | 0.849001 | 0.421904 | 0.604592  |
| Mus_musc Mus_musc | 0        | 0.204383 | 0.111878 | 0.084127 | 0        | 0         |
| ENSMUSG Zfp664    | 37.38087 | 38.49309 | 35.16613 | 28.40748 | 29.54755 | 27.96917  |
| ENSMUSG Ltn1      | 8.614367 | 8.812308 | 8.568515 | 7.505481 | 7.780788 | 7.697488  |
| ENSMUSG Hivep2    | 8.574427 | 9.679745 | 7.642988 | 6.811905 | 6.717443 | 6.515485  |
| Mus_musc Mus_musc | 0.23924  | 0        | 0        | 0        | 0        | 0         |
| Mus_musc Mus_musc | 0        | 0.400836 | 0.145546 | 0.540341 | 0.34122  | 0.180047  |
| ENSMUSG Cln3      | 8.3866   | 7.024577 | 9.162969 | 8.667767 | 9.658198 | 9.747576  |
| ENSMUSG Olfr600   | 0        | 0        | 0        | 0        | 0        | 0         |
| ENSMUSG Krt14     | 0.421133 | 0.288169 | 0.148315 | 0.30376  | 0.360521 | 0.583474  |
| ENSMUSG Akap8l    | 18.39822 | 18.52377 | 19.21338 | 16.86042 | 15.76165 | 15.549625 |
| ENSMUSG Vmn1r166  | 0        | 0        | 0        | 0        | 0        | 0         |
| ENSMUSG Zfp819    | 0        | 0.019608 | 0.216187 | 0.207022 | 0.180162 | 0.023394  |
| ENSMUSG Csrnp2    | 1.89987  | 2.231541 | 2.342285 | 1.734277 | 1.534206 | 2.131917  |
| ENSMUSG Mafk      | 40.59131 | 38.58078 | 43.16695 | 27.54013 | 26.26013 | 25.472539 |
| ENSMUSG Fhl2      | 0.915678 | 2.622496 | 1.080246 | 2.722517 | 2.195769 | 2.704934  |
| ENSMUSG Fam117b   | 17.19883 | 16.3724  | 12.62366 | 10.53802 | 12.8673  | 11.30568  |
| ENSMUSG Lrit1     | 0        | 0        | 0        | 0        | 0        | 0         |
| ENSMUSG Ramp3     | 5.220884 | 6.93499  | 7.143638 | 9.381112 | 7.673464 | 6.112429  |
| ENSMUSG Sez6l     | 0.073567 | 0.099517 | 0        | 0.008564 | 0.046126 | 0.013719  |
| ENSMUSG Chsy3     | 0.298246 | 0.561852 | 0.348305 | 0.445638 | 0.718234 | 0.957882  |
| ENSMUSG T2        | 0.505099 | 0.694285 | 0.65919  | 1.414923 | 0.614995 | 0.734368  |
| ENSMUSG Prss27    | 0.090039 | 0        | 0        | 0        | 0        | 0         |
| ENSMUSG Olfr1395  | 0        | 0        | 0.016928 | 0        | 0.01733  | 0         |
| ENSMUSG Gp1bb     | 0.107166 | 0.094442 | 0.33482  | 0.081264 | 0.002655 | 0.084462  |
| ENSMUSG Ear14     | 0        | 0        | 0        | 0        | 0        | 0         |
| ENSMUSG Scmh1     | 12.82748 | 13.32886 | 12.23495 | 10.34441 | 10.31481 | 10.833894 |
| ENSMUSG Cox5a     | 44.70941 | 44.85047 | 49.2734  | 62.09679 | 63.55495 | 63.433453 |
| ENSMUSG Otx2      | 0        | 0        | 0        | 0        | 0        | 0         |
| ENSMUSG Abhd13    | 9.530846 | 10.29647 | 8.592498 | 9.153499 | 8.350573 | 8.446383  |
| ENSMUSG Gm49356   | 0        | 0.16993  | 0        | 0        | 0        | 0.171249  |
| ENSMUSG Vmn1r37   | 0        | 0        | 0        | 0        | 0        | 0         |
| ENSMUSG Vmn1r3    | 0        | 0.070821 | 0        | 0        | 0        | 0         |
| Mus_musc Mus_musc | 0.188031 | 0.154824 | 0.149227 | 0        | 0        | 0         |
| Mus_musc Mus_musc | 0.051147 | 0        | 0        | 0        | 0        | 0.347521  |
| Mus_musc Mus_musc | 0        | 0        | 0        | 0.322934 | 0        | 0         |
| Mus_musc Mus_musc | 0.094525 | 0.048718 | 0.145587 | 0.285311 | 0.075638 | 0.149745  |
| ENSMUSG Gm35060   | 0.069059 | 0.042833 | 0.078223 | 0.147017 | 0.017877 | 0         |
| ENSMUSG Ugt1a6b   | 1.47145  | 2.872913 | 0.604679 | 2.03517  | 0.443841 | 1.3442    |
| ENSMUSG Gm614     | 0.254647 | 0.314395 | 0.615395 | 0.277176 | 0.37014  | 0.293024  |
| ENSMUSG Cope      | 56.99241 | 51.79288 | 62.23398 | 64.00494 | 67.10005 | 66.657014 |
| Mus_musc Mus_musc | 0        | 0.252575 | 0.198122 | 0.096928 | 0.067805 | 0.054596  |
| Mus_musc Mus_musc | 0.090468 | 0        | 0.194755 | 0.139541 | 0        | 0         |
| Mus_musc Mus_musc | 0        | 0        | 0.253965 | 0.276854 | 0        | 0         |
| Mus_musc Mus_musc | 30.24892 | 24.23734 | 23.09379 | 41.96074 | 48.43611 | 37.652427 |
| Mus_musc Mus_musc | 0        | 0        | 0        | 0        | 0.098512 | 0.100745  |
| Mus_musc Mus_musc | 0.321137 | 0        | 0        | 0        | 0        | 0         |
| Mus_musc Mus_musc | 17.17345 | 19.99142 | 17.2498  | 21.98311 | 17.79207 | 19.209557 |
| ENSMUSG Lats1     | 11.8352  | 12.07181 | 10.38945 | 9.32343  | 9.149886 | 9.73072   |
| ENSMUSG Rab11fip2 | 6.00309  | 6.117292 | 4.673107 | 4.961559 | 4.062813 | 3.721593  |
| ENSMUSG Ythdf2    | 10.49971 | 10.26185 | 9.257993 | 9.243955 | 9.642151 | 9.695557  |
| ENSMUSG Saa3      | 2.078402 | 2.829958 | 3.171129 | 31.82689 | 75.67511 | 47.212551 |
| ENSMUSG Elavl1    | 8.860412 | 10.63801 | 9.437852 | 7.557516 | 7.613684 | 8.937994  |
| ENSMUSG lpo8      | 11.07391 | 12.21606 | 10.70346 | 9.836296 | 10.21659 | 10.109733 |
| ENSMUSG Ssbp3     | 17.81696 | 18.43348 | 14.01848 | 16.286   | 19.55021 | 17.244655 |
| ENSMUSG Plcg2     | 6.986125 | 6.270833 | 9.449871 | 16.51651 | 15.9558  | 15.948352 |
| ENSMUSG Gsta2     | 5.432053 | 5.450721 | 3.870674 | 3.05412  | 2.334045 | 2.551085  |
| Mus_musc Mus_musc | 0        | 0        | 0.083174 | 0.371034 | 0        | 0         |
| ENSMUSG C8g       | 1.041877 | 0.88739  | 0.884507 | 1.46074  | 1.060644 | 1.103562  |
| ENSMUSG Mospd2    | 33.55154 | 29.35615 | 27.78194 | 30.09792 | 25.42665 | 23.832292 |

|                   |          |          |          |          |          |           |
|-------------------|----------|----------|----------|----------|----------|-----------|
| ENSMUSG Sumf2     | 3.297734 | 3.345798 | 3.714604 | 2.633608 | 2.349776 | 3.299271  |
| ENSMUSG Phkg1     | 0.118648 | 0.412228 | 0.150873 | 0.275391 | 0.238676 | 0.280835  |
| ENSMUSG Jph2      | 4.233331 | 4.739206 | 5.059016 | 4.345762 | 4.831084 | 4.845875  |
| ENSMUSG Gusb      | 18.00727 | 19.24285 | 21.58595 | 40.94084 | 42.84014 | 48.794302 |
| ENSMUSG Asl       | 9.428389 | 9.648647 | 10.24052 | 9.722995 | 10.45997 | 11.576718 |
| ENSMUSG Crpc      | 10.91882 | 12.09484 | 13.30283 | 11.06356 | 12.12632 | 11.810527 |
| ENSMUSG Chm       | 6.860116 | 6.729166 | 6.041487 | 6.041512 | 5.689859 | 5.701261  |
| ENSMUSG Hist1h2ao | 0.317499 | 0.085835 | 0        | 0.358183 | 0.30569  | 0.454326  |
| Mus_musc Mus_musc | 0.556432 | 0.468706 | 0.202612 | 0.419325 | 0.257216 | 0.25924   |
| ENSMUSG Tmem41b   | 11.03981 | 8.910419 | 9.575829 | 9.728499 | 9.61071  | 10.60321  |
| ENSMUSG Lxn       | 24.62781 | 22.48683 | 32.51375 | 20.90212 | 20.96137 | 19.619728 |
| ENSMUSG Slc22a26  | 0        | 0        | 0        | 0        | 0        | 0         |
| ENSMUSG Gm20824   | 0        | 0        | 0        | 0        | 0        | 0         |
| ENSMUSG Gm28710   | 0        | 0.015498 | 0        | 0.054355 | 0.102882 | 0.086019  |
| ENSMUSG Chmp1b    | 26.43209 | 25.83416 | 27.44134 | 25.53425 | 25.22401 | 23.709909 |
| Mus_musc Mus_musc | 0        | 0        | 0        | 0        | 0.364871 | 0         |
| ENSMUSG Itpkb     | 53.84069 | 50.42751 | 48.00561 | 31.02676 | 32.37878 | 33.157345 |
| Mus_musc Mus_musc | 0.081082 | 0.103281 | 0.231058 | 0        | 0.157059 | 0         |
| ENSMUSG Baiap211  | 116.5162 | 126.2859 | 110.5161 | 85.35922 | 81.07756 | 90.568924 |
| ENSMUSG Ndufs1    | 23.34097 | 25.67441 | 21.74664 | 24.78265 | 27.23576 | 24.562549 |
| ENSMUSG Gm45799   | 1.3857   | 1.441453 | 1.373173 | 1.234398 | 0.005901 | 1.106985  |
| Mus_musc Mus_musc | 0.447421 | 0.548704 | 0.173715 | 0.484144 | 0.872126 | 0.572296  |
| ENSMUSG Kif3a     | 8.173471 | 8.330505 | 7.322419 | 10.18238 | 9.262347 | 9.286744  |
| ENSMUSG 8-Sep     | 26.37708 | 25.62568 | 27.36498 | 20.16395 | 22.14152 | 23.815958 |
| ENSMUSG Myadm     | 90.86117 | 77.43698 | 84.26553 | 59.60249 | 62.59194 | 65.778754 |
| ENSMUSG Izumo2    | 0        | 0        | 0        | 0        | 0        | 0         |
| ENSMUSG Fhl4      | 0.048973 | 0.059556 | 0.029798 | 0.100006 | 0.068597 | 0.1451    |
| ENSMUSG Dtna      | 10.02037 | 9.659417 | 9.595118 | 6.726235 | 7.209198 | 5.54172   |
| ENSMUSG Kifc5b    | 0.333869 | 0.499717 | 0.713429 | 0.616208 | 1.155801 | 1.444919  |
| ENSMUSG Ntn4      | 42.66672 | 42.17442 | 40.05629 | 22.3544  | 22.58389 | 22.013803 |
| ENSMUSG Snrpf     | 9.838838 | 14.04428 | 12.52219 | 13.13492 | 11.52224 | 13.320351 |
| ENSMUSG Hal       | 0.456716 | 0.376011 | 0.263441 | 3.845547 | 5.286001 | 6.463521  |
| ENSMUSG Fbxo47    | 0.252042 | 0.303765 | 0.145807 | 0.388442 | 0.233495 | 0.370332  |
| ENSMUSG Cdk17     | 11.73099 | 11.90667 | 12.53302 | 10.51958 | 10.44655 | 10.046469 |
| ENSMUSG Krtap31-1 | 0        | 0        | 0        | 0        | 0        | 0         |
| ENSMUSG Trim80    | 0        | 0        | 0        | 0        | 0        | 0         |
| ENSMUSG Qrich2    | 0.004947 | 0        | 0        | 0.003691 | 0        | 0         |
| ENSMUSG Vnn3      | 1.092576 | 0.903276 | 0.563991 | 3.049654 | 2.912906 | 2.41705   |
| ENSMUSG Gm35549   | 0.111144 | 0.474092 | 0.749246 | 0.248866 | 0.171335 | 0.315983  |
| ENSMUSG Pm20d2    | 0.601639 | 1.188995 | 0.554742 | 1.269154 | 0.8354   | 1.175733  |
| ENSMUSG Hsf4      | 6.226976 | 5.867421 | 6.336877 | 3.969426 | 4.086869 | 4.113956  |
| ENSMUSG Olfr843   | 0        | 0        | 0        | 0        | 0        | 0         |
| Mus_musc Mus_musc | 0        | 0        | 0        | 0.186566 | 0.106509 | 0         |
| ENSMUSG Gm5065    | 0        | 0        | 0        | 0        | 0        | 0         |
| ENSMUSG Tprg      | 0.107546 | 0        | 0.100208 | 0.112693 | 0        | 0.0593    |
| ENSMUSG Fgl2      | 13.67551 | 12.26486 | 24.20314 | 22.0283  | 16.42927 | 18.872526 |
| ENSMUSG Prkcd     | 35.32984 | 32.86327 | 41.72046 | 61.96733 | 66.52978 | 68.71281  |
| ENSMUSG Txlnb     | 0.383334 | 1.669398 | 0.304941 | 0.537868 | 0.451701 | 0.386991  |
| ENSMUSG Gdf10     | 1.451776 | 1.067014 | 1.123247 | 2.57604  | 2.303518 | 2.8738    |
| ENSMUSG Ptpn20    | 0.134598 | 0.075564 | 0.087817 | 0.072962 | 0        | 0         |
| ENSMUSG Cryl1     | 11.88471 | 11.04004 | 8.82382  | 10.25663 | 8.852983 | 10.829955 |
| ENSMUSG Gata4     | 0.443533 | 0.514328 | 0.287738 | 0.41421  | 0.253243 | 0.634725  |
| ENSMUSG Zmym2     | 11.85751 | 12.67975 | 10.71202 | 10.58921 | 9.780988 | 9.412069  |
| ENSMUSG Tmem159   | 20.91219 | 22.7366  | 17.95188 | 16.82586 | 17.51148 | 16.336166 |
| ENSMUSG Zp2       | 0        | 0        | 0        | 0        | 0        | 0         |
| ENSMUSG Olfr290   | 0        | 0        | 0        | 0        | 0        | 0         |
| ENSMUSG Nsl1      | 0.34423  | 0.237109 | 0.410223 | 0.40007  | 0.430136 | 0.810699  |
| ENSMUSG Zmat4     | 0.216949 | 0.203496 | 0.179055 | 0.149074 | 0.21749  | 0.159319  |
| ENSMUSG Slc2a12   | 3.531798 | 4.365237 | 2.960818 | 4.089361 | 4.304616 | 3.657535  |
| ENSMUSG Fabp4     | 10.72891 | 32.32932 | 3.21516  | 22.96129 | 14.13069 | 18.472483 |
| ENSMUSG Zfp534    | 0        | 0        | 0        | 0        | 0        | 0         |
| ENSMUSG Zfp398    | 4.204925 | 4.029756 | 3.363367 | 3.916745 | 3.573145 | 3.870884  |
| ENSMUSG Nenf      | 31.50122 | 29.30415 | 26.42473 | 22.48221 | 25.94004 | 27.619869 |
| ENSMUSG Gm10409   | 0        | 0        | 0        | 0        | 0        | 0         |

|                  |          |          |          |          |          |           |
|------------------|----------|----------|----------|----------|----------|-----------|
| ENSMUSG Fam208b  | 5.843676 | 5.445889 | 4.457986 | 4.914112 | 5.193061 | 4.822729  |
| ENSMUSG Gm3250   | 0        | 0        | 0        | 0        | 0        | 0         |
| ENSMUSG Adamts2  | 3.581964 | 3.648828 | 3.748007 | 4.986801 | 4.882522 | 5.933948  |
| ENSMUSG Olfr1466 | 0        | 0        | 0        | 0        | 0        | 0         |
| ENSMUSG Gm13696  | 0        | 0        | 0        | 0        | 0        | 0         |
| ENSMUSG Atp7a    | 11.19244 | 12.18582 | 9.608128 | 10.32773 | 10.22404 | 10.020135 |
| ENSMUSG Gm5426   | 0        | 0        | 0        | 0        | 0        | 0         |
| ENSMUSG Gm17067  | 0        | 0        | 0        | 0        | 0        | 0         |
| ENSMUSG Trem12   | 2.842195 | 2.147072 | 3.409268 | 3.922752 | 3.572037 | 5.03139   |
| ENSMUSG Zfp827   | 1.942381 | 2.182774 | 1.86756  | 2.118809 | 1.827845 | 1.698587  |
| ENSMUSG Olfr806  | 0        | 0        | 0        | 0        | 0        | 0         |
| ENSMUSG Gm44579  | 0        | 0        | 0        | 0        | 0        | 0         |
| ENSMUSG Msrb2    | 6.741697 | 9.250105 | 9.009199 | 7.636195 | 7.035773 | 7.563109  |
| ENSMUSG Fhl1     | 223.0559 | 206.2213 | 219.5576 | 156.9148 | 148.5146 | 142.39266 |
| ENSMUSG Gm7257   | 0        | 0        | 0        | 0        | 0        | 0         |
| ENSMUSG Trp53    | 18.95424 | 16.62669 | 17.85483 | 18.45925 | 18.98613 | 19.775703 |
| ENSMUSG Vmn2r9   | 0.008179 | 0.025923 | 0.009842 | 0.007249 | 0.01055  | 0.035643  |
| ENSMUSG Lsm5     | 3.656716 | 4.088215 | 4.5949   | 1.718674 | 0.797411 | 2.837041  |
| ENSMUSG Vmn2r23  | 0        | 0        | 0        | 0        | 0        | 0         |
| ENSMUSG Cyp2c70  | 0        | 0        | 0        | 0.041958 | 0        | 0         |
| ENSMUSG Slc1a5   | 40.96055 | 41.28368 | 38.06635 | 36.24699 | 34.02058 | 37.486507 |
| ENSMUSG Ang4     | 0        | 0        | 0        | 0        | 0        | 0         |
| ENSMUSG Cntlh    | 3.885761 | 3.93656  | 3.303783 | 2.867182 | 2.832947 | 3.274405  |
| ENSMUSG Npy6r    | 0        | 0        | 0        | 0        | 0        | 0         |
| ENSMUSG Galnt11  | 11.8886  | 9.838504 | 10.12522 | 9.90952  | 9.907647 | 10.745674 |
| ENSMUSG Fkbp14   | 11.49847 | 10.56508 | 11.13828 | 6.509751 | 7.571705 | 5.922747  |
| ENSMUSG Bcat1    | 0.014403 | 0.02295  | 0.019281 | 0.826082 | 1.066095 | 1.154202  |
| ENSMUSG Kcna6    | 0.167857 | 0.119164 | 0.086933 | 0.074107 | 0.033784 | 0.136834  |
| ENSMUSG Kras     | 30.48073 | 30.59139 | 30.66424 | 20.59825 | 20.3892  | 19.635241 |
| ENSMUSG Tmem237  | 9.893325 | 11.56076 | 9.759273 | 8.555812 | 8.597061 | 7.893992  |
| ENSMUSG Lrmp     | 5.641829 | 4.333291 | 7.948236 | 12.68355 | 9.82453  | 12.146024 |
| ENSMUSG Thap11   | 18.49107 | 19.72732 | 20.0291  | 16.37225 | 17.97481 | 16.227224 |
| ENSMUSG Dok6     | 0        | 0        | 0        | 0        | 0        | 0         |
| ENSMUSG Cfap20   | 26.84258 | 26.85101 | 23.20103 | 23.79092 | 25.69466 | 23.054889 |
| ENSMUSG Usb1     | 15.33875 | 13.59169 | 14.06648 | 14.22743 | 12.93169 | 13.44731  |
| ENSMUSG Mmp15    | 35.99104 | 35.45409 | 27.08617 | 33.50346 | 31.6773  | 36.089592 |
| ENSMUSG Tmem38a  | 5.58827  | 7.786541 | 7.666676 | 6.399734 | 5.716991 | 5.670045  |
| ENSMUSG Tpm4     | 217.2994 | 212.1687 | 231.9451 | 167.2088 | 179.1115 | 178.73262 |
| ENSMUSG Pop1     | 1.373166 | 1.196655 | 1.504719 | 0.947457 | 1.082719 | 0.936566  |
| ENSMUSG Matn2    | 1.375879 | 1.980693 | 1.535052 | 1.152922 | 0.919142 | 1.317295  |
| ENSMUSG Rida     | 7.504589 | 8.08579  | 9.028998 | 7.324711 | 6.43633  | 7.239216  |
| ENSMUSG Shcbp1   | 0.288675 | 0.535573 | 0.1535   | 0.931342 | 1.269049 | 1.636233  |
| ENSMUSG Cdh10    | 0        | 0        | 0        | 0        | 0        | 0.015407  |
| ENSMUSG Stk3     | 9.593926 | 10.37603 | 9.289575 | 9.493942 | 9.380938 | 8.356012  |
| ENSMUSG Cd40lg   | 0.90571  | 0.73266  | 0.609522 | 1.088228 | 1.234858 | 0.946865  |
| ENSMUSG Arhgef6  | 18.94414 | 19.12919 | 17.76013 | 16.65244 | 16.77221 | 16.478681 |
| ENSMUSG Brs3     | 0        | 0        | 0        | 0        | 0        | 0         |
| ENSMUSG Vgll1    | 0        | 0        | 0        | 0        | 0        | 0         |
| ENSMUSG Fgf13    | 0.554172 | 0.274908 | 0.708529 | 0.399069 | 0.247428 | 0.407601  |
| ENSMUSG Rbmx     | 14.58406 | 15.5631  | 16.2592  | 12.46088 | 12.79535 | 12.797845 |
| ENSMUSG F9       | 0.066987 | 0.030817 | 0.09763  | 0.265543 | 0.40343  | 0.26422   |
| ENSMUSG Mcf2     | 0        | 0        | 0        | 0        | 0        | 0         |
| ENSMUSG Hoxb2    | 8.033031 | 4.749465 | 6.240987 | 4.721203 | 4.683363 | 4.805926  |
| ENSMUSG Htr1f    | 0        | 0        | 0        | 0        | 0        | 0         |
| ENSMUSG Ccpg1    | 68.11233 | 69.27569 | 67.45506 | 63.78028 | 59.5027  | 60.89011  |
| ENSMUSG Washc4   | 9.307907 | 10.68828 | 8.83236  | 9.990833 | 10.39566 | 9.906774  |
| ENSMUSG A730049H | 0.197314 | 0.164967 | 0.203344 | 0.151539 | 0.120165 | 0.069472  |
| ENSMUSG Atp5h    | 119.273  | 119.2813 | 125.4252 | 127.6738 | 125.0427 | 130.37961 |
| ENSMUSG Ubxn10   | 5.547614 | 7.682553 | 3.994962 | 9.390521 | 9.428517 | 8.442546  |
| ENSMUSG Tnfsf10  | 33.49748 | 30.90924 | 54.8448  | 42.58663 | 27.29622 | 28.302203 |
| ENSMUSG Hexdc    | 6.090367 | 6.943234 | 6.911526 | 6.779965 | 5.47775  | 6.443401  |
| ENSMUSG Ndst2    | 8.712617 | 8.266021 | 7.864665 | 8.200962 | 8.07171  | 8.103064  |
| ENSMUSG 1700019D | 0.200839 | 0.430888 | 0.221157 | 0.601338 | 0.485394 | 0.601314  |
| ENSMUSG Irf5     | 7.535306 | 7.352422 | 11.91858 | 20.02288 | 17.70186 | 19.653824 |

|                   |          |          |          |          |          |           |
|-------------------|----------|----------|----------|----------|----------|-----------|
| ENSMUSG Ahcyl2    | 20.8681  | 29.50353 | 21.06083 | 50.11626 | 52.15934 | 52.027177 |
| ENSMUSG Klhdc10   | 12.57767 | 11.96272 | 10.84033 | 10.43267 | 10.81143 | 10.539737 |
| ENSMUSG Gars      | 24.28161 | 20.20155 | 21.45134 | 19.22243 | 20.24071 | 22.604025 |
| ENSMUSG Hibadh    | 33.52127 | 35.59057 | 34.76314 | 36.77441 | 37.14021 | 38.13306  |
| ENSMUSG Adcyap1r1 | 1.073479 | 1.190446 | 0.645814 | 0.891296 | 1.492518 | 0.843025  |
| ENSMUSG Tymp      | 2.815603 | 2.99946  | 3.524808 | 3.489286 | 2.930165 | 3.095778  |
| ENSMUSG Cdx2      | 0        | 0        | 0        | 0.056954 | 0        | 0         |
| ENSMUSG Rasl11a   | 16.99856 | 20.2165  | 20.37009 | 21.86988 | 21.49093 | 19.881727 |
| ENSMUSG Mapk12    | 22.09167 | 18.84801 | 21.74455 | 13.2683  | 12.92385 | 12.266123 |
| ENSMUSG Hnrnph1   | 82.71004 | 83.50374 | 96.86978 | 69.21199 | 61.94077 | 64.957102 |
| ENSMUSG Olfr447   | 0        | 0        | 0        | 0        | 0        | 0         |
| ENSMUSG Crim1     | 48.97285 | 43.08938 | 51.70862 | 29.27459 | 27.72468 | 28.470888 |
| ENSMUSG Strn      | 7.492287 | 7.995891 | 7.118801 | 6.929176 | 6.971528 | 7.025206  |
| ENSMUSG Vit       | 0.304614 | 0.514668 | 0.070744 | 0.195415 | 0.139054 | 0.197313  |
| ENSMUSG Prkd3     | 24.31998 | 25.69411 | 21.65419 | 19.61263 | 20.0471  | 19.736644 |
| ENSMUSG Birc6     | 14.5849  | 15.27383 | 12.54854 | 12.89342 | 13.67729 | 15.038989 |
| ENSMUSG Yipf4     | 25.48073 | 22.71674 | 22.79563 | 18.86807 | 19.85758 | 18.360188 |
| ENSMUSG Psg23     | 0        | 0        | 0        | 0        | 0        | 0         |
| ENSMUSG Ccdc61    | 6.593056 | 6.50968  | 7.746908 | 6.49126  | 6.367777 | 7.347536  |
| ENSMUSG Bpifb3    | 0        | 0        | 0        | 0        | 0        | 0         |
| ENSMUSG Bpifb6    | 0        | 0        | 0        | 0        | 0        | 0         |
| ENSMUSG Hsd3b7    | 24.19354 | 20.74282 | 22.3952  | 24.62918 | 23.81665 | 25.296255 |
| ENSMUSG Gucy2f    | 0.013566 | 0.016282 | 0        | 0.006428 | 0        | 0         |
| ENSMUSG Stab1     | 17.66305 | 13.84094 | 16.87407 | 16.98602 | 17.57029 | 16.284273 |
| ENSMUSG Itga1     | 29.77583 | 29.42778 | 35.57338 | 24.68657 | 21.76255 | 20.663715 |
| ENSMUSG Tubgcp6   | 5.399655 | 5.632755 | 4.88886  | 4.42751  | 4.258719 | 4.326174  |
| ENSMUSG Nfe2      | 3.170013 | 3.437505 | 4.975312 | 3.864167 | 2.991461 | 4.063373  |
| ENSMUSG Cds2      | 46.31242 | 44.80906 | 46.01389 | 32.98537 | 33.85633 | 32.45628  |
| ENSMUSG Zfp626    | 2.330598 | 2.755936 | 2.761257 | 2.620169 | 2.261749 | 2.440114  |
| ENSMUSG Nap111    | 49.39731 | 59.51234 | 57.93788 | 48.7803  | 48.68922 | 44.826319 |
| ENSMUSG Fam111a   | 6.169142 | 5.409492 | 6.420562 | 8.11444  | 8.045631 | 8.824093  |
| ENSMUSG Zfp91     | 32.49228 | 34.00013 | 29.82608 | 29.16621 | 28.42566 | 26.417717 |
| ENSMUSG Keg1      | 0        | 0        | 0        | 0        | 0        | 0         |
| ENSMUSG Gna14     | 5.087687 | 5.454146 | 4.154741 | 5.696444 | 5.735837 | 5.896355  |
| ENSMUSG Lpxn      | 2.726849 | 2.306072 | 2.454062 | 8.973156 | 8.867608 | 11.833994 |
| ENSMUSG Zdhhc4    | 18.78748 | 20.53004 | 19.43728 | 14.93529 | 14.12357 | 14.405088 |
| ENSMUSG Rac1      | 106.7518 | 106.9946 | 105.63   | 76.5373  | 87.59464 | 73.620356 |
| ENSMUSG Sod2      | 22.75839 | 23.34619 | 20.5033  | 20.11874 | 20.24837 | 18.686402 |
| ENSMUSG Fabp9     | 0        | 0        | 0        | 0        | 0        | 0         |
| ENSMUSG Stx16     | 14.94982 | 15.75748 | 17.06187 | 17.72191 | 13.48906 | 14.696552 |
| ENSMUSG Gnas      | 363.6171 | 287.7596 | 377.5538 | 315.9944 | 326.9383 | 315.40346 |
| ENSMUSG Nrpf2     | 10.14956 | 10.73558 | 9.481014 | 10.97648 | 13.52386 | 11.448354 |
| Mus_musc Mus_musc | 0.302799 | 0.38769  | 0.222171 | 0.121774 | 0.31058  | 0.450204  |
| Mus_musc Mus_musc | 0        | 0        | 0        | 0.32592  | 0        | 0.258455  |
| Mus_musc Mus_musc | 0        | 0        | 0        | 0        | 0        | 0         |
| ENSMUSG Edn3      | 9.401029 | 7.461153 | 6.716374 | 4.19978  | 4.3259   | 4.162048  |
| Mus_musc Mus_musc | 0        | 0.033081 | 0        | 0.144672 | 0.394128 | 0.407617  |
| Mus_musc Mus_musc | 0.146353 | 0.123573 | 0.243655 | 0.183615 | 0.143023 | 0.160481  |
| ENSMUSG Rhox3g    | 0        | 0        | 0        | 0        | 0        | 0         |
| ENSMUSG Cyp2a5    | 14.55523 | 37.6236  | 4.658627 | 15.26566 | 9.692699 | 7.706955  |
| ENSMUSG Fcer2a    | 3.38725  | 1.913363 | 2.420024 | 7.460415 | 7.874211 | 9.777047  |
| ENSMUSG Psmc9     | 8.708744 | 7.769473 | 7.781569 | 7.209642 | 7.636738 | 7.599832  |
| ENSMUSG Gm10647   | 0.157924 | 0.061845 | 0.104465 | 0.369229 | 0.097564 | 0.128098  |
| ENSMUSG Aicda     | 0.04691  | 0.146307 | 0.082115 | 0.499917 | 0.741491 | 0.751128  |
| ENSMUSG Plekhg1   | 5.407594 | 5.531363 | 5.089819 | 5.128632 | 4.662204 | 5.108478  |
| ENSMUSG Dhx33     | 4.934878 | 4.583999 | 5.072565 | 4.014379 | 4.56884  | 4.677421  |
| ENSMUSG Gemin8    | 3.271529 | 3.472145 | 3.75082  | 3.700928 | 4.051369 | 3.916361  |
| ENSMUSG Eml5      | 0.820468 | 0.975482 | 0.721614 | 1.175897 | 0.620758 | 0.931655  |
| ENSMUSG Mael      | 0        | 0        | 0        | 0        | 0        | 0         |
| ENSMUSG Tmem8b    | 1.466033 | 1.694831 | 1.434749 | 1.110754 | 1.092969 | 0.93871   |
| ENSMUSG Pigc      | 7.073218 | 7.229471 | 7.473248 | 6.739082 | 6.860185 | 7.001658  |
| ENSMUSG Itga7     | 2.720163 | 2.829331 | 2.859985 | 4.82887  | 4.749313 | 6.252007  |
| ENSMUSG Fmo3      | 20.21016 | 21.01996 | 10.90807 | 5.617762 | 5.222692 | 3.826771  |
| ENSMUSG Myoc      | 0.14116  | 0.022923 | 0        | 0.120653 | 0        | 0         |

|                    |          |          |          |          |          |           |
|--------------------|----------|----------|----------|----------|----------|-----------|
| ENSMUSG Vamp4      | 20.82419 | 23.10199 | 20.20272 | 25.34964 | 22.04803 | 21.516036 |
| ENSMUSG Mettl13    | 1.872695 | 1.936826 | 2.021988 | 2.11615  | 2.057724 | 1.911174  |
| ENSMUSG Vmn1r114   | 0        | 0        | 0        | 0        | 0        | 0         |
| ENSMUSG Tdpoz1     | 0        | 0        | 0        | 0        | 0        | 0         |
| ENSMUSG Gm1604a    | 0        | 0        | 0        | 0        | 0.074455 | 0.164334  |
| ENSMUSG Gm20826    | 0        | 0        | 0        | 0        | 0        | 0         |
| ENSMUSG Olfr8      | 0        | 0        | 0        | 0        | 0        | 0         |
| Mus_musc Mus_musc  | 0.205874 | 0.306741 | 0.369933 | 0.273303 | 0        | 0         |
| Mus_musc Mus_musc  | 0.288371 | 0.313936 | 0.500163 | 0.917989 | 0.715517 | 0.571923  |
| ENSMUSG Odf3b      | 8.40852  | 7.13219  | 7.28665  | 11.15911 | 9.008375 | 8.806615  |
| Mus_musc Mus_musc  | 0        | 0        | 0        | 0.6465   | 0        | 0         |
| ENSMUSG Acmsd      | 0.051973 | 0.039472 | 0.127402 | 0.030935 | 0.034494 | 0         |
| ENSMUSG Defb9      | 0        | 0        | 0        | 0        | 0        | 0         |
| ENSMUSG Lypd1      | 0.105386 | 0.054289 | 0        | 0.085534 | 0.047154 | 0.102658  |
| ENSMUSG Tmem163    | 5.201762 | 4.936477 | 4.609088 | 4.073635 | 4.27113  | 4.536825  |
| Mus_musc Mus_musc  | 0.039941 | 0.175508 | 0.135454 | 0        | 0.329864 | 0.292932  |
| ENSMUSG Gpr39      | 3.154131 | 3.936478 | 2.052795 | 2.798137 | 3.02727  | 3.679589  |
| ENSMUSG Slc35f5    | 19.84573 | 22.73148 | 21.64199 | 19.89451 | 19.05139 | 17.445717 |
| ENSMUSG Neu1       | 13.0419  | 14.06179 | 17.34751 | 19.08667 | 18.63898 | 19.686436 |
| ENSMUSG Ddah2      | 57.53078 | 55.2092  | 60.24255 | 37.99302 | 36.34813 | 39.714809 |
| ENSMUSG Abhd16a    | 40.82438 | 38.51689 | 43.47345 | 35.25557 | 30.66646 | 34.083134 |
| ENSMUSG Mamstr     | 1.895452 | 0.989623 | 1.41638  | 0.833926 | 0.895268 | 1.077767  |
| ENSMUSG Msh5       | 1.5619   | 0.956739 | 1.375197 | 1.876241 | 1.032644 | 1.623011  |
| ENSMUSG Hspa1l     | 0.920962 | 1.572634 | 1.386804 | 1.031989 | 1.032339 | 1.227922  |
| ENSMUSG Vwa7       | 0.498613 | 0.595747 | 0.693276 | 0.444823 | 0.492889 | 0.477129  |
| Mus_musc Mus_musc  | 0.169715 | 0.285982 | 0.319827 | 0.341081 | 0.18657  | 0.262421  |
| ENSMUSG Mapk3      | 166.947  | 160.9344 | 164.3392 | 133.8024 | 131.4995 | 137.28991 |
| Mus_musc Mus_musc  | 0.316892 | 0.199631 | 0.232336 | 0        | 0.175378 | 0         |
| Mus_musc Mus_musc  | 0.120896 | 0.082432 | 0.079384 | 0.54871  | 0.246327 | 0.699202  |
| Mus_musc Mus_musc  | 0        | 0.053726 | 0        | 0        | 0.053515 | 0.175507  |
| Mus_musc Mus_musc  | 0        | 0.042166 | 0.234252 | 0        | 0        | 0         |
| Mus_musc Mus_musc  | 0.279304 | 0.385978 | 0.211506 | 0.101548 | 0        | 0         |
| Mus_musc Mus_musc  | 0.709787 | 0.311725 | 0.313923 | 0.339974 | 0.363327 | 0.263599  |
| Mus_musc Mus_musc  | 0.298977 | 0.077587 | 0.058663 | 0.546195 | 0.413298 | 0.460849  |
| ENSMUSG Sox7       | 40.29555 | 33.201   | 28.90401 | 15.96602 | 15.6134  | 15.846942 |
| ENSMUSG Sf3a1      | 11.95922 | 11.22068 | 11.27977 | 10.56892 | 11.16832 | 11.740526 |
| ENSMUSG Serinc4    | 0.003422 | 0.15789  | 0.016822 | 0.029912 | 0.024344 | 0.010499  |
| ENSMUSG Cep295     | 2.933062 | 3.407403 | 2.438458 | 2.973224 | 2.663106 | 2.624407  |
| Mus_musc Mus_musc  | 0        | 0.06751  | 0.338036 | 0        | 0.067093 | 0         |
| Mus_musc Mus_musc  | 0.180169 | 0.120033 | 0.315797 | 0.12748  | 0.131888 | 0.048132  |
| Mus_musc Mus_musc  | 0        | 0.388603 | 0.070631 | 0        | 0        | 0.220663  |
| Mus_musc Mus_musc  | 0.049299 | 0.393744 | 0.312515 | 0.044098 | 0.031115 | 0.053856  |
| ENSMUSG Sertad4    | 1.483428 | 1.198868 | 0.787545 | 0.852575 | 0.595075 | 1.201444  |
| Mus_musc Mus_musc  | 0.119656 | 0        | 0        | 0        | 0        | 0.116791  |
| Mus_musc Mus_musc  | 1.787205 | 2.004715 | 1.613462 | 2.186086 | 2.018793 | 2.091671  |
| ENSMUSG Gm21820    | 0        | 0        | 0        | 0        | 0        | 0         |
| Mus_musc Mus_musc  | 0        | 0        | 0        | 0        | 0        | 0.202833  |
| ENSMUSG Bmp10      | 0        | 0        | 0        | 0        | 0        | 0         |
| Mus_musc Mus_musc  | 0        | 0        | 0        | 0        | 0        | 0         |
| Mus_musc Mus_musc  | 0.180963 | 0        | 0        | 0        | 0.192307 | 0         |
| Mus_musc Mus_musc  | 0.431815 | 0.316592 | 0.371579 | 0.394959 | 0.44214  | 0.224911  |
| Mus_musc Mus_musc  | 0.878401 | 0.921667 | 1.168872 | 0.66117  | 0.449718 | 0.479161  |
| ENSMUSG Gm5089     | 0        | 0        | 0        | 0        | 0        | 0         |
| ENSMUSG Scgb3a1    | 11.81489 | 169.1757 | 2.707929 | 451.7381 | 393.5004 | 329.9962  |
| ENSMUSG Sstr2      | 1.158496 | 1.120632 | 0.722886 | 0.564598 | 0.571141 | 0.24031   |
| ENSMUSG Sirpb1b    | 0.715231 | 0.378001 | 1.086289 | 1.072418 | 0.860292 | 0.862444  |
| ENSMUSG Gm36079    | 0        | 0.060593 | 0.044224 | 0.651017 | 0.357426 | 0.367408  |
| ENSMUSG Gm3336     | 0.09398  | 0.231665 | 0.180845 | 0.292904 | 0.165628 | 0.603517  |
| ENSMUSG Gm5458     | 0        | 0        | 0        | 0        | 0        | 0         |
| ENSMUSG Olfr766-ps | 0        | 0        | 0        | 0        | 0        | 0         |
| ENSMUSG Gm20765    | 0        | 0        | 0        | 0        | 0        | 0         |
| ENSMUSG Smim11     | 24.91708 | 24.80162 | 26.61814 | 21.66621 | 22.42321 | 19.348352 |
| ENSMUSG Casr       | 0.012441 | 0.031277 | 0.022356 | 0.031856 | 0.019723 | 0.042655  |
| ENSMUSG Igfn1      | 0        | 0        | 0        | 0.015429 | 0        | 0.019589  |

|                   |          |          |          |          |          |           |
|-------------------|----------|----------|----------|----------|----------|-----------|
| ENSMUSG Sec31b    | 0.631975 | 0.580961 | 0.439729 | 0.60952  | 0.466128 | 0.519882  |
| ENSMUSG Tmem143   | 4.133231 | 4.511449 | 2.949445 | 4.140565 | 4.363383 | 4.098179  |
| ENSMUSG Adgrg4    | 0        | 0        | 0        | 0        | 0        | 0         |
| ENSMUSG Dnajc5g   | 0        | 0        | 0        | 0        | 0        | 0         |
| ENSMUSG Tcf25     | 62.99153 | 60.97188 | 63.85333 | 58.03289 | 54.81672 | 61.612763 |
| ENSMUSG Tubb6     | 14.1869  | 14.38638 | 15.68082 | 23.04544 | 23.36098 | 28.237942 |
| ENSMUSG Fbxo7     | 4.434022 | 4.168612 | 4.392553 | 4.231552 | 4.109851 | 4.321994  |
| ENSMUSG Pwp1      | 9.457499 | 8.263704 | 8.80641  | 8.751348 | 8.718576 | 10.379312 |
| ENSMUSG Rtcbl     | 52.43625 | 53.35237 | 57.24896 | 49.93589 | 50.36263 | 54.012463 |
| ENSMUSG Lnp1      | 0        | 0        | 0        | 0        | 0        | 0         |
| ENSMUSG Vmn1r189  | 0        | 0        | 0        | 0        | 0        | 0         |
| ENSMUSG Spin2e    | 0        | 0        | 0        | 0        | 0        | 0         |
| ENSMUSG Magea1    | 0        | 0        | 0        | 0        | 0        | 0         |
| ENSMUSG Tpra1     | 24.8035  | 23.10889 | 25.77572 | 23.98796 | 23.51742 | 23.635492 |
| ENSMUSG Mcm2      | 4.735006 | 5.86572  | 4.944477 | 6.508338 | 6.67277  | 8.078487  |
| ENSMUSG Gm904     | 0        | 0        | 0        | 0        | 0        | 0         |
| ENSMUSG Gm4312    | 0        | 0        | 0        | 0        | 0        | 0         |
| ENSMUSG Tns4      | 0.356765 | 0.307156 | 0.385843 | 0.839193 | 0.749596 | 0.789735  |
| ENSMUSG Gm3411    | 0.07593  | 0.051307 | 0        | 0.013512 | 0        | 0.029525  |
| ENSMUSG mt-Co2    | 2140.729 | 2315.438 | 2104.032 | 2350.753 | 2287.49  | 2101.5015 |
| ENSMUSG Gm15114   | 0        | 0        | 0        | 0        | 0        | 0         |
| ENSMUSG Gm2974    | 0        | 0        | 0        | 0        | 0        | 0.015198  |
| Mus_musc Mus_musc | 0        | 0        | 0        | 0        | 0        | 0         |
| Mus_musc Mus_musc | 0        | 0.080505 | 0        | 0        | 0        | 0.164866  |
| ENSMUSG mt-Atp8   | 2886.283 | 2952.022 | 2648.303 | 3444.167 | 3003.378 | 2641.9556 |
| Mus_musc Mus_musc | 0        | 0        | 0        | 0.15051  | 0        | 0         |
| Mus_musc Mus_musc | 0.552759 | 0.296176 | 0.277911 | 0.23919  | 0.373478 | 0.068289  |
| ENSMUSG mt-Atp6   | 2309.337 | 2474.085 | 2274.941 | 2853.233 | 2487.564 | 2182.7026 |
| ENSMUSG Gm49366   | 0        | 0        | 0        | 0        | 0        | 0         |
| Mus_musc Mus_musc | 0        | 0        | 0        | 0.261897 | 0        | 0.077315  |
| Mus_musc Mus_musc | 0.188031 | 0        | 0        | 0        | 0        | 0         |
| ENSMUSG Nedd8     | 53.66402 | 57.01792 | 54.5549  | 57.27127 | 49.24092 | 56.260256 |
| ENSMUSG Ddx3x     | 91.6015  | 93.4668  | 82.83965 | 78.81266 | 76.29958 | 74.574646 |
| ENSMUSG Tcf7      | 19.63199 | 15.86759 | 19.1713  | 13.88362 | 16.378   | 13.772641 |
| ENSMUSG Slc45a4   | 7.147994 | 4.810502 | 7.29144  | 9.267767 | 5.431214 | 5.480948  |
| ENSMUSG Col22a1   | 0.005059 | 0.016326 | 0.02238  | 0.008889 | 0.018269 | 0.008951  |
| ENSMUSG Gm21961   | 0        | 0        | 0        | 0        | 0        | 0         |
| ENSMUSG Gsdmc     | 0        | 0        | 0        | 0        | 0        | 0         |
| ENSMUSG Gm5662    | 0        | 0        | 0        | 0        | 0        | 0         |
| Mus_musc Mus_musc | 0        | 0        | 0        | 0        | 0.012158 | 0.199913  |
| Mus_musc Mus_musc | 0        | 0        | 0        | 0        | 0.041647 | 0         |
| Mus_musc Mus_musc | 0        | 0        | 0.168936 | 0        | 0        | 0         |
| Mus_musc Mus_musc | 0.662615 | 0.623985 | 0.141567 | 0.382623 | 0.468809 | 0.812282  |
| ENSMUSG Smim10l2a | 0.661449 | 0.485304 | 0.429647 | 0.935382 | 0.676009 | 0.713347  |
| ENSMUSG Rnd1      | 5.66699  | 4.527884 | 5.886634 | 4.318786 | 3.173386 | 4.669889  |
| ENSMUSG Cep170    | 12.27796 | 11.56645 | 11.23259 | 9.979423 | 11.38128 | 10.620484 |
| ENSMUSG Rbbp8     | 5.168748 | 5.446821 | 4.399948 | 4.906499 | 4.995199 | 4.969601  |
| ENSMUSG Vps41     | 17.18745 | 17.61464 | 16.6666  | 18.60257 | 19.47669 | 19.906546 |
| ENSMUSG Pklr      | 0.051641 | 0.137007 | 0.047677 | 0.282438 | 0.335833 | 0.230264  |
| ENSMUSG Chd7      | 4.862986 | 4.698859 | 4.864953 | 5.309536 | 5.947305 | 5.904312  |
| ENSMUSG Ublcp1    | 9.336598 | 8.742344 | 8.790222 | 7.481694 | 7.695963 | 7.637379  |
| ENSMUSG Carmil2   | 1.093644 | 0.632433 | 0.967201 | 1.561911 | 1.414926 | 1.697484  |
| ENSMUSG Fam72a    | 0.586493 | 0.675341 | 0.514065 | 0.493615 | 0.584021 | 0.610564  |
| ENSMUSG Myf5      | 0        | 0        | 0        | 0        | 0        | 0         |
| ENSMUSG Gpr18     | 1.535381 | 1.227057 | 3.064759 | 2.511734 | 2.511374 | 2.521433  |
| ENSMUSG Mkrn2     | 8.503383 | 8.970151 | 8.711169 | 6.879345 | 5.700533 | 6.540721  |
| ENSMUSG Mcrip2    | 3.762818 | 4.705676 | 4.567073 | 6.302758 | 4.653811 | 5.170871  |
| ENSMUSG Fam71d    | 0.08154  | 0.022816 | 0        | 0.029472 | 0        | 0.031183  |
| ENSMUSG Cln5      | 21.42187 | 20.3597  | 22.16864 | 25.04271 | 28.55518 | 29.807469 |
| ENSMUSG Fbxl3     | 32.12057 | 30.39159 | 29.61124 | 24.72057 | 23.27535 | 23.15139  |
| ENSMUSG Actl11    | 0        | 0        | 0        | 0        | 0        | 0         |
| ENSMUSG Rnf219    | 2.902756 | 2.819186 | 2.744489 | 2.688224 | 2.718826 | 2.680078  |
| ENSMUSG Scel      | 42.98257 | 36.17036 | 29.13923 | 19.39834 | 18.37252 | 18.869066 |
| ENSMUSG Ednrb     | 41.36238 | 38.18075 | 32.63898 | 18.67115 | 19.3707  | 17.380022 |

|                   |          |          |          |          |          |           |
|-------------------|----------|----------|----------|----------|----------|-----------|
| ENSMUSG Serpina3f | 3.778984 | 3.012645 | 27.72285 | 25.58067 | 12.59905 | 8.724446  |
| ENSMUSG Serpina3c | 0.915602 | 0.601688 | 1.015525 | 3.640342 | 5.55859  | 4.185763  |
| ENSMUSG Dct       | 0        | 0.124036 | 0        | 0        | 0        | 0.041739  |
| ENSMUSG Serpina1a | 2.563525 | 1.843165 | 3.216286 | 1.711749 | 2.732285 | 1.924863  |
| ENSMUSG Serpina3b | 0        | 0        | 0        | 0        | 0        | 0         |
| ENSMUSG Ubl7      | 29.13954 | 30.08686 | 28.29778 | 26.79165 | 26.58833 | 26.615949 |
| ENSMUSG Rras2     | 20.63669 | 22.18517 | 22.16551 | 18.35028 | 20.14331 | 20.325794 |
| ENSMUSG Paqr3     | 1.299279 | 0.886893 | 1.28659  | 0.962768 | 0.871654 | 0.652099  |
| ENSMUSG Kctd16    | 0.041119 | 0.104551 | 0.036442 | 0.059209 | 0.088433 | 0         |
| ENSMUSG Ppp1r37   | 23.87992 | 22.43352 | 21.79889 | 19.04148 | 19.07065 | 20.826565 |
| ENSMUSG Gpx1      | 267.2084 | 257.3359 | 280.9122 | 372.0802 | 367.4136 | 439.19887 |
| ENSMUSG Rnf183    | 0.048567 | 0.040395 | 0.114267 | 0.175535 | 0.314086 | 0         |
| ENSMUSG Sidt1     | 1.459855 | 1.183458 | 1.582242 | 1.256065 | 1.250536 | 1.657091  |
| ENSMUSG Jmjd8     | 22.03928 | 20.79336 | 23.88937 | 19.09631 | 17.83761 | 17.294955 |
| ENSMUSG Trnt1     | 14.41782 | 13.88591 | 13.12767 | 13.30669 | 13.74385 | 13.239437 |
| ENSMUSG Gm29797   | 0.046572 | 0.053753 | 0.153721 | 0        | 0.059346 | 0.078066  |
| ENSMUSG Gm6169    | 4.553282 | 3.889343 | 4.011168 | 3.500935 | 4.455241 | 4.721426  |
| ENSMUSG Olfr1022  | 0        | 0        | 0        | 0        | 0        | 0         |
| ENSMUSG Ankrd29   | 3.752982 | 3.572409 | 4.105499 | 2.651591 | 2.760303 | 2.439491  |
| ENSMUSG Dpysl4    | 0        | 0.052827 | 0        | 0.012188 | 0        | 0         |
| ENSMUSG Cyp2e1    | 6.195087 | 11.61214 | 1.968341 | 6.010536 | 3.279083 | 3.655489  |
| ENSMUSG Adam8     | 3.355132 | 3.339315 | 2.663405 | 30.66797 | 36.74805 | 39.445059 |
| ENSMUSG Zfp511    | 7.203939 | 6.535106 | 8.556656 | 7.773617 | 7.566956 | 7.716814  |
| ENSMUSG Inpp5a    | 39.11477 | 41.42724 | 42.36684 | 26.05468 | 28.56182 | 26.383544 |
| ENSMUSG Tubgcp2   | 8.406781 | 7.123466 | 6.775663 | 6.99248  | 6.812682 | 7.460916  |
| ENSMUSG Adgra1    | 0.023717 | 0.026983 | 0        | 0.019896 | 0.011771 | 0.100842  |
| ENSMUSG Gm4064    | 0        | 0        | 0        | 0        | 0        | 0         |
| ENSMUSG D1Pas1    | 0        | 0        | 0        | 0        | 0        | 0         |
| ENSMUSG Ppp1r10   | 14.64842 | 12.7716  | 15.01976 | 11.15202 | 10.85673 | 13.786714 |
| ENSMUSG Rpl22l1   | 24.90762 | 23.91706 | 24.34224 | 26.81019 | 17.75561 | 23.643951 |
| ENSMUSG Olfr487   | 0        | 0        | 0        | 0        | 0        | 0         |
| ENSMUSG Olfr204   | 0        | 0        | 0        | 0        | 0        | 0         |
| ENSMUSG Gm21822   | 0        | 0        | 0        | 0        | 0        | 0         |
| ENSMUSG Gdi1      | 53.71111 | 50.57071 | 57.66681 | 40.31722 | 39.47915 | 39.146847 |
| ENSMUSG Ubl4a     | 24.1234  | 22.08573 | 23.10205 | 18.81164 | 17.93028 | 17.749248 |
| ENSMUSG Cbln4     | 0        | 0        | 0        | 0        | 0.019171 | 0         |
| ENSMUSG Dhps      | 13.878   | 12.8813  | 14.2197  | 11.19892 | 10.93247 | 11.010717 |
| ENSMUSG Olfr317   | 0        | 0        | 0        | 0        | 0        | 0         |
| ENSMUSG H2afj     | 38.37595 | 42.97878 | 47.34741 | 52.55636 | 48.48015 | 52.798576 |
| ENSMUSG Ctf2      | 0.11209  | 0.075309 | 0.053075 | 0        | 0        | 0.056824  |
| ENSMUSG Rpl3      | 174.5193 | 175.8356 | 173.7756 | 185.3694 | 177.6448 | 196.21477 |
| ENSMUSG Ect2l     | 0.647347 | 0.884064 | 0.58979  | 1.050939 | 0.926216 | 1.129342  |
| ENSMUSG Gm11808   | 291.6461 | 288.0072 | 334.273  | 341.693  | 297.6884 | 354.68808 |
| ENSMUSG Apol9b    | 0.458087 | 0.825095 | 2.444988 | 1.703977 | 0.834045 | 1.219149  |
| ENSMUSG 2410004Pc | 3.031875 | 3.839502 | 2.109072 | 4.715361 | 3.995133 | 4.551641  |
| ENSMUSG Phf11d    | 7.76322  | 7.126168 | 12.0631  | 7.2874   | 5.663172 | 5.724061  |
| ENSMUSG lbtk      | 8.003194 | 8.366564 | 7.151867 | 9.434694 | 9.43743  | 9.392983  |
| ENSMUSG Gsx2      | 0        | 0        | 0        | 0        | 0        | 0         |
| ENSMUSG Ttc38     | 4.455126 | 4.108068 | 3.479661 | 3.756483 | 3.363325 | 4.010239  |
| ENSMUSG Fbxw2     | 46.25622 | 44.00192 | 42.35284 | 30.86544 | 37.92925 | 32.910501 |
| ENSMUSG Olfr1450  | 0        | 0        | 0        | 0        | 0        | 0         |
| ENSMUSG Vmn2r69   | 0        | 0        | 0        | 0        | 0        | 0         |
| ENSMUSG D630036H  | 0.415619 | 0.158974 | 0.20469  | 0.112904 | 0.253206 | 0.15571   |
| ENSMUSG Tcerg1l   | 0.042591 | 0.118093 | 0.019759 | 0        | 0.021253 | 0.043084  |
| ENSMUSG Slc25a35  | 4.462289 | 6.302695 | 5.293114 | 9.354209 | 9.010905 | 11.452387 |
| ENSMUSG Lrrc14b   | 0.002154 | 0.001352 | 0        | 0.001791 | 0.002878 | 0         |
| ENSMUSG Ccdc127   | 5.209256 | 4.457886 | 4.779474 | 4.587952 | 4.440233 | 4.154162  |
| ENSMUSG Olfr17    | 0        | 0        | 0        | 0        | 0        | 0         |
| ENSMUSG Olfr716   | 0        | 0        | 0        | 0        | 0        | 0         |
| ENSMUSG Ahrr      | 0        | 0.053947 | 0.049572 | 0.061641 | 0.016415 | 0.03452   |
| ENSMUSG Rbmxl2    | 0        | 0        | 0        | 0        | 0        | 0         |
| ENSMUSG Olfr472   | 0        | 0        | 0        | 0        | 0        | 0         |
| ENSMUSG Cep72     | 0.729901 | 0.844693 | 0.588146 | 0.592073 | 0.450068 | 0.932567  |
| ENSMUSG Rap1a     | 42.58719 | 43.44784 | 49.9594  | 53.38859 | 48.21197 | 47.221651 |

|                   |          |          |          |          |          |           |
|-------------------|----------|----------|----------|----------|----------|-----------|
| ENSMUSG Col28a1   | 0.17474  | 0.177693 | 0.13381  | 0.156039 | 0.249938 | 0.099844  |
| ENSMUSG Vmn1r229  | 0        | 0        | 0        | 0        | 0        | 0         |
| ENSMUSG AC170998  | 0.307605 | 0.589272 | 0.256138 | 0.286648 | 0.362509 | 0.174053  |
| ENSMUSG Pcdha5    | 0        | 0.074193 | 0        | 0        | 0        | 0.030448  |
| ENSMUSG Parp9     | 13.46292 | 13.32489 | 19.57638 | 17.25287 | 12.39485 | 13.012707 |
| ENSMUSG Kpna1     | 13.54268 | 15.35787 | 13.99515 | 12.45205 | 11.97558 | 12.41179  |
| ENSMUSG Stfa2     | 0        | 0        | 0.211619 | 0        | 0.08086  | 0         |
| ENSMUSG Cd86      | 1.793001 | 1.956488 | 2.23536  | 3.550916 | 2.412662 | 3.22141   |
| ENSMUSG Ildr1     | 5.385392 | 6.218736 | 5.7257   | 5.653948 | 5.580361 | 6.153137  |
| ENSMUSG Coq10a    | 8.841567 | 7.902248 | 7.432476 | 7.879417 | 7.496617 | 8.973629  |
| ENSMUSG Rhbdd2    | 7.162504 | 6.204416 | 5.795491 | 5.174647 | 5.208025 | 4.925328  |
| ENSMUSG Cited2    | 26.88021 | 24.65401 | 24.20441 | 25.4871  | 27.61878 | 23.985957 |
| ENSMUSG Spsb1     | 7.765292 | 10.32021 | 7.119123 | 6.567508 | 7.33752  | 7.36339   |
| ENSMUSG Pak7      | 0        | 0        | 0        | 0        | 0.021103 | 0         |
| ENSMUSG Slc16a10  | 4.016246 | 3.874341 | 3.685038 | 3.541927 | 3.803471 | 3.637156  |
| ENSMUSG Wasf1     | 0.473917 | 0.287208 | 0.261575 | 0.334592 | 0.386362 | 0.21826   |
| ENSMUSG Rab32     | 6.015813 | 6.270345 | 8.002457 | 9.155184 | 10.07026 | 11.030949 |
| ENSMUSG Slc22a16  | 0        | 0        | 0        | 0        | 0        | 0         |
| ENSMUSG Gtf3c6    | 9.212599 | 8.143577 | 8.53439  | 9.998788 | 9.15839  | 9.143036  |
| ENSMUSG Kif1b     | 27.72679 | 29.07157 | 25.27312 | 21.51021 | 22.51767 | 22.123946 |
| ENSMUSG Ifna11    | 0        | 0        | 0        | 0        | 0        | 0         |
| ENSMUSG Cpa1      | 0.100964 | 0.113563 | 0.176833 | 0.050457 | 0.194122 | 0         |
| ENSMUSG Helb      | 2.883851 | 3.047269 | 3.164938 | 3.36051  | 3.366682 | 3.891788  |
| ENSMUSG Slc5a4a   | 0        | 0        | 0        | 0        | 0        | 0         |
| ENSMUSG Llph      | 20.28963 | 18.39778 | 21.8854  | 18.30389 | 18.27305 | 17.904368 |
| ENSMUSG Tmbim4    | 38.32516 | 36.03496 | 49.75849 | 43.34125 | 40.20476 | 42.895418 |
| ENSMUSG Slc5a4b   | 0        | 0.014217 | 0        | 0        | 0        | 0         |
| ENSMUSG Irak3     | 3.531378 | 3.355938 | 3.271303 | 4.09347  | 3.837489 | 3.314817  |
| ENSMUSG Vps13d    | 7.513286 | 9.331103 | 6.845109 | 7.795494 | 8.309692 | 8.188306  |
| ENSMUSG Olfr1463  | 0        | 0        | 0        | 0        | 0        | 0         |
| ENSMUSG Fan1      | 3.430514 | 3.260006 | 2.627836 | 2.646655 | 3.02188  | 2.979851  |
| ENSMUSG Adamts15  | 5.456245 | 7.564693 | 6.122796 | 7.98048  | 8.756667 | 9.446095  |
| ENSMUSG Tagap     | 4.527746 | 3.499374 | 5.099609 | 5.115487 | 5.754415 | 5.802435  |
| ENSMUSG Zbtb1     | 3.326139 | 3.241647 | 3.276017 | 3.378554 | 3.138453 | 3.322379  |
| ENSMUSG Scgb1b11  | 0        | 0        | 0        | 0        | 0        | 0         |
| ENSMUSG Ppfia1    | 19.31873 | 18.82692 | 16.73066 | 15.92014 | 16.1498  | 15.681063 |
| ENSMUSG Pank2     | 10.79228 | 10.49303 | 9.503494 | 9.453881 | 10.86386 | 8.560292  |
| ENSMUSG Gm6525    | 0.02741  | 0.162707 | 0.098505 | 0.076946 | 0.305348 | 0         |
| ENSMUSG Atp6v1e1  | 69.20345 | 66.18821 | 70.06871 | 63.41658 | 62.00393 | 64.473525 |
| ENSMUSG Tssk5     | 0        | 0        | 0        | 0        | 0        | 0         |
| ENSMUSG 1700010I1 | 0.635871 | 0.635695 | 0.511002 | 1.055872 | 0.785501 | 1.1742    |
| ENSMUSG Gmfg      | 40.69015 | 33.90362 | 43.70334 | 40.43082 | 36.16431 | 36.656938 |
| ENSMUSG Cebp      | 28.11656 | 19.33118 | 22.5782  | 8.317286 | 15.14242 | 12.100444 |
| ENSMUSG Rimbp3    | 0.08727  | 0.015603 | 0        | 0.083191 | 0.018792 | 0.051148  |
| ENSMUSG Intu      | 2.350684 | 2.796986 | 1.805086 | 2.39792  | 2.492154 | 2.364058  |
| ENSMUSG Gm4952    | 0        | 0.073388 | 0        | 0        | 0        | 0         |
| ENSMUSG 2510002D  | 9.98571  | 10.56906 | 10.55727 | 8.498963 | 8.80998  | 9.71124   |
| ENSMUSG Glis      | 20.8428  | 18.94668 | 20.19596 | 17.90813 | 15.80832 | 16.229547 |
| ENSMUSG Inpp1     | 3.823605 | 3.881918 | 4.00483  | 3.77574  | 2.985103 | 3.235989  |
| ENSMUSG Mstn      | 0        | 0        | 0        | 0.013188 | 0        | 0         |
| ENSMUSG Nabp1     | 7.549128 | 6.149422 | 8.552522 | 10.51869 | 8.768829 | 8.898369  |
| ENSMUSG Stat1     | 25.24439 | 20.96514 | 79.30282 | 55.02383 | 23.89923 | 28.073885 |
| ENSMUSG Rpp25     | 0.938175 | 0.973027 | 0.466444 | 0.637978 | 0.372335 | 0.733897  |
| ENSMUSG Bcs1l     | 5.625855 | 4.848806 | 5.17794  | 4.541119 | 5.873637 | 4.919076  |
| ENSMUSG Tmeff2    | 1.605579 | 1.087438 | 1.405098 | 0.789205 | 0.745801 | 0.663632  |
| ENSMUSG 2310007B  | 25.12013 | 21.31308 | 21.45335 | 14.42582 | 13.7407  | 14.630785 |
| ENSMUSG Lrrc58    | 20.38585 | 20.32638 | 19.05851 | 13.86414 | 14.41782 | 13.749717 |
| ENSMUSG Cipc      | 13.66074 | 13.14901 | 13.2544  | 10.64244 | 10.0552  | 10.611369 |
| ENSMUSG Tspoap1   | 0.410331 | 0.46156  | 0.343162 | 0.428151 | 0.490836 | 0.390537  |
| ENSMUSG Ino80     | 6.557766 | 6.510618 | 6.137557 | 5.540938 | 5.1492   | 5.713035  |
| ENSMUSG Exoc3     | 10.67936 | 11.06293 | 10.00623 | 9.725796 | 10.0739  | 9.927653  |
| ENSMUSG Zbbx      | 0.697693 | 0.700837 | 0.637199 | 1.59268  | 1.706582 | 1.766666  |
| ENSMUSG Kcng1     | 0.477007 | 0.401243 | 0.693287 | 0.608072 | 0.576011 | 0.612338  |
| ENSMUSG Cenps     | 1.349411 | 0.537172 | 1.373907 | 1.564265 | 2.978891 | 1.711989  |



|                    |          |          |          |          |          |           |
|--------------------|----------|----------|----------|----------|----------|-----------|
| ENSMUSG Mocs3      | 2.228453 | 2.578365 | 2.357914 | 1.925644 | 2.354992 | 2.644515  |
| ENSMUSG Rpl31      | 188.1    | 195.0227 | 198.9792 | 205.7117 | 195.8666 | 199.98589 |
| ENSMUSG Khl21      | 14.00516 | 14.86334 | 13.67951 | 10.56607 | 11.39395 | 11.295063 |
| ENSMUSG Lekr1      | 1.03933  | 1.194126 | 1.142327 | 1.359956 | 1.128271 | 1.033494  |
| ENSMUSG Oasl2      | 10.6646  | 8.153831 | 22.06318 | 9.952068 | 6.630711 | 7.014204  |
| ENSMUSG Zbtb40     | 2.465418 | 2.961972 | 2.706618 | 2.752036 | 2.925932 | 2.880402  |
| ENSMUSG Tcl1b2     | 0        | 0        | 0        | 0        | 0        | 0         |
| ENSMUSG Ube2s      | 35.07916 | 29.9507  | 36.00868 | 27.18634 | 38.1407  | 44.321346 |
| ENSMUSG Pnkd       | 23.00898 | 22.67798 | 25.7065  | 21.02513 | 20.33886 | 22.795527 |
| ENSMUSG Zc3h6      | 1.946451 | 1.597761 | 1.150271 | 1.564804 | 1.293474 | 1.095578  |
| ENSMUSG Trp53rkb   | 0.758993 | 0.252574 | 0.852912 | 0.354162 | 0.591818 | 0.778783  |
| ENSMUSG Ctns       | 7.369911 | 8.056274 | 8.226944 | 7.546844 | 8.517177 | 9.039042  |
| ENSMUSG Defb14     | 0        | 0        | 0        | 0        | 0        | 0         |
| ENSMUSG Simc1      | 1.73913  | 1.807502 | 2.016918 | 1.827846 | 1.742316 | 1.616432  |
| ENSMUSG Gjb2       | 0.717349 | 0.934578 | 0.817929 | 1.611421 | 1.515886 | 1.349934  |
| ENSMUSG Itgae      | 2.181262 | 2.283697 | 2.029145 | 3.619174 | 3.281561 | 3.748226  |
| ENSMUSG Olfr1318   | 0        | 0        | 0        | 0        | 0        | 0         |
| ENSMUSG Zfp672     | 8.584363 | 7.363208 | 6.568398 | 6.275207 | 6.134158 | 6.336337  |
| ENSMUSG Rpl36al    | 96.94464 | 98.45061 | 106.7246 | 142.221  | 137.7754 | 135.06808 |
| ENSMUSG Gm10775    | 0        | 0        | 0        | 0.044119 | 0        | 0         |
| ENSMUSG St6galnac6 | 10.93825 | 11.69201 | 9.568082 | 13.03218 | 12.81426 | 13.462211 |
| ENSMUSG Dpm2       | 19.11906 | 19.67993 | 21.49617 | 20.74837 | 17.1001  | 21.7021   |
| ENSMUSG Tsc1       | 5.57931  | 6.130244 | 5.277897 | 5.346656 | 5.492803 | 5.814318  |
| ENSMUSG Thsd7b     | 0.018068 | 0.057621 | 0.02197  | 0.019858 | 0.052044 | 0.020426  |
| ENSMUSG Eng        | 234.4649 | 194.1996 | 230.0793 | 136.4607 | 138.6731 | 133.22553 |
| ENSMUSG Ak1        | 7.302819 | 9.47233  | 5.872477 | 10.20563 | 9.156646 | 11.582411 |
| ENSMUSG Gtf3c5     | 9.822497 | 9.727907 | 9.630181 | 7.403814 | 8.302074 | 8.520285  |
| ENSMUSG Slc25a25   | 17.36849 | 12.41126 | 15.55465 | 9.086359 | 9.988463 | 10.260008 |
| ENSMUSG Cel        | 0        | 0.016156 | 0.023256 | 0.022522 | 0        | 0         |
| ENSMUSG Cux2       | 0.386959 | 0.977324 | 0.41107  | 0.429632 | 0.518292 | 0.630715  |
| ENSMUSG Cdc42bpg   | 70.77055 | 76.05225 | 69.31257 | 44.82994 | 42.68583 | 41.087868 |
| ENSMUSG Slfn8      | 2.089674 | 1.982518 | 3.985616 | 2.904285 | 2.801707 | 3.131551  |
| ENSMUSG Sppl2b     | 8.183246 | 8.250163 | 8.539431 | 9.052788 | 8.853303 | 8.572262  |
| ENSMUSG Chrn4      | 0.136819 | 0.192814 | 0.063345 | 0.180653 | 0.239345 | 0.366938  |
| ENSMUSG B020004JC  | 0.02693  | 0.052556 | 0        | 0.048083 | 0        | 0         |
| ENSMUSG Lars2      | 11.81935 | 19.79491 | 30.90031 | 24.41588 | 19.34452 | 16.113375 |
| ENSMUSG Epn1       | 46.09028 | 42.78455 | 47.03108 | 44.10891 | 40.76754 | 42.701583 |
| ENSMUSG Chmp5      | 65.95026 | 67.58305 | 67.74425 | 57.26439 | 56.38767 | 56.475338 |
| ENSMUSG B4galt1    | 28.28234 | 26.06567 | 23.64602 | 27.29227 | 30.17115 | 32.856964 |
| ENSMUSG Slc44a1    | 23.18944 | 24.0975  | 21.34161 | 21.35045 | 21.6397  | 21.935161 |
| ENSMUSG Aptx       | 5.380934 | 4.086337 | 5.310283 | 3.260471 | 2.878559 | 3.804879  |
| ENSMUSG Dnaja1     | 56.20079 | 98.94037 | 96.31723 | 54.92969 | 55.38875 | 64.531003 |
| ENSMUSG Tal2       | 0        | 0.041966 | 0.064197 | 0.029989 | 0.111287 | 0.071108  |
| ENSMUSG Ubc        | 141.6066 | 127.2909 | 144.6533 | 96.95178 | 102.7258 | 132.18937 |
| ENSMUSG Spink4     | 0.162929 | 0.834514 | 0.348511 | 1.306655 | 0        | 0.899126  |
| ENSMUSG Fktn       | 7.239773 | 8.408613 | 6.707791 | 5.380693 | 5.752996 | 5.319088  |
| ENSMUSG Gli2       | 0.723951 | 0.658947 | 0.74816  | 0.83264  | 0.67985  | 0.778095  |
| ENSMUSG Prss54     | 0        | 0        | 0        | 0        | 0.030224 | 0         |
| ENSMUSG Magea10    | 0        | 0        | 0        | 0        | 0        | 0         |
| ENSMUSG Zfp536     | 0.048422 | 0.13319  | 0.075671 | 0.068419 | 0.055836 | 0.028021  |
| ENSMUSG Pcdhb12    | 0.443429 | 0.677252 | 0.931933 | 0.446397 | 0.475776 | 0.53125   |
| Mus_musc Mus_musc  | 0        | 0        | 0        | 0        | 0.158326 | 0.184186  |
| Mus_musc Mus_musc  | 5.04763  | 2.820676 | 3.311258 | 2.519476 | 2.066733 | 2.137937  |
| Mus_musc Mus_musc  | 0        | 0.29963  | 0        | 0        | 0        | 0         |
| ENSMUSG Pgrmc1     | 159.7216 | 165.4276 | 144.1143 | 91.37619 | 95.66369 | 92.719276 |
| ENSMUSG Gcat       | 2.918284 | 2.811944 | 2.262944 | 2.947187 | 2.993703 | 4.328182  |
| ENSMUSG Prox2      | 0.881659 | 1.142444 | 0.927417 | 0.899341 | 0.875274 | 0.771138  |
| ENSMUSG Pbrm1      | 14.42916 | 14.70078 | 11.98653 | 14.01537 | 13.96589 | 13.776012 |
| ENSMUSG Prrt2      | 1.968266 | 1.791427 | 2.438125 | 1.484692 | 1.296701 | 1.206568  |
| ENSMUSG Taar6      | 0        | 0        | 0        | 0        | 0        | 0         |
| ENSMUSG Hps4       | 4.059262 | 3.900079 | 3.469178 | 4.872005 | 4.120969 | 4.621499  |
| ENSMUSG Sec14l1    | 63.26678 | 64.52323 | 60.76337 | 50.89374 | 56.64155 | 51.576325 |
| ENSMUSG Gm1123     | 0        | 0        | 0.022532 | 0.033626 | 0.044092 | 0.03595   |
| ENSMUSG Defb36     | 0        | 0        | 0        | 0        | 0        | 0         |

|                   |          |          |          |          |          |           |
|-------------------|----------|----------|----------|----------|----------|-----------|
| ENSMUSG Ankrd50   | 26.23347 | 27.49137 | 24.76725 | 20.04852 | 21.3063  | 18.299607 |
| ENSMUSG Rhox7b    | 0        | 0        | 0        | 0        | 0        | 0         |
| ENSMUSG Rhox2h    | 0        | 0        | 0        | 0        | 0        | 0         |
| ENSMUSG Tent5a    | 4.856916 | 6.00987  | 4.75256  | 6.866985 | 7.227176 | 8.00549   |
| ENSMUSG Tm4sf19   | 0        | 0        | 0.045829 | 16.84759 | 15.73674 | 19.999666 |
| ENSMUSG Bckdhh    | 8.636747 | 9.847935 | 8.409118 | 6.511053 | 7.740246 | 7.383135  |
| ENSMUSG Elovl4    | 0.135463 | 0.12536  | 0.051621 | 0.06622  | 0.014308 | 0.046952  |
| ENSMUSG Muc4      | 0.637826 | 0.87296  | 0.438072 | 2.591826 | 3.087632 | 2.621616  |
| ENSMUSG Htr3a     | 0        | 0        | 0        | 0        | 0        | 0         |
| ENSMUSG Rhox2g    | 0        | 0        | 0        | 0        | 0        | 0         |
| ENSMUSG Il20rb    | 0.350682 | 0.387458 | 0.654212 | 1.016496 | 1.136664 | 0.987569  |
| ENSMUSG Dnajb3    | 0.38322  | 0.357657 | 0.611932 | 0.268889 | 0.079935 | 0.513654  |
| ENSMUSG Bhlha9    | 0        | 0.02787  | 0        | 0        | 0        | 0         |
| ENSMUSG Vmn1r45   | 0        | 0        | 0        | 0        | 0        | 0         |
| ENSMUSG Defb29    | 0        | 0        | 0        | 0        | 0        | 0         |
| ENSMUSG Psm2      | 53.27398 | 51.57915 | 56.50057 | 51.90665 | 53.88103 | 56.289988 |
| ENSMUSG Tas2r117  | 0        | 0        | 0        | 0        | 0        | 0         |
| Mus_musc Mus_musc | 1.922962 | 4.076924 | 2.339766 | 2.558262 | 3.192379 | 1.866954  |
| ENSMUSG Prdx6b    | 0        | 0        | 0        | 0.015984 | 0        | 0         |
| Mus_musc Mus_musc | 0        | 0        | 0        | 0.108675 | 0.391152 | 0.501429  |
| Mus_musc Mus_musc | 0.89853  | 1.01916  | 0.82625  | 1.115839 | 0.894844 | 1.38811   |
| Mus_musc Mus_musc | 0.293313 | 0.535269 | 0.36476  | 0.2056   | 0.13485  | 0.176245  |
| Mus_musc Mus_musc | 0.174921 | 0.313253 | 0.039235 | 0.540213 | 0.679269 | 0.245344  |
| Mus_musc Mus_musc | 0.434134 | 0.400571 | 0.07039  | 0.516994 | 0.224822 | 0.509364  |
| Mus_musc Mus_musc | 0.814803 | 0.247002 | 0.149579 | 0.393962 | 0.151039 | 0         |
| Mus_musc Mus_musc | 0.508509 | 0.235051 | 0.57122  | 0.12714  | 0.426351 | 0.619057  |
| Mus_musc Mus_musc | 6.386481 | 5.837504 | 7.640193 | 4.614419 | 4.664276 | 4.265182  |
| Mus_musc Mus_musc | 1.185804 | 0.905421 | 0.929948 | 0.496929 | 0.390299 | 0.323753  |
| Mus_musc Mus_musc | 0.883964 | 0.369314 | 1.210643 | 0.327388 | 0.650054 | 0.371547  |
| ENSMUSG Bcas3     | 11.61686 | 9.972447 | 9.550019 | 7.758886 | 8.759203 | 7.896631  |
| ENSMUSG Pacsin2   | 61.4113  | 64.77078 | 65.53521 | 47.91417 | 49.56943 | 48.146978 |
| ENSMUSG Actg2     | 12.48886 | 8.33078  | 12.2321  | 18.47958 | 25.20993 | 19.52929  |
| ENSMUSG Gckr      | 0        | 0        | 0.027735 | 0.018152 | 0        | 0         |
| ENSMUSG Max       | 44.15789 | 44.06933 | 50.32715 | 40.65793 | 37.53401 | 37.449887 |
| ENSMUSG Cenpm     | 0.383052 | 0.442106 | 0.186504 | 1.306914 | 1.354868 | 2.194988  |
| ENSMUSG Utp15     | 4.487539 | 4.302794 | 4.448782 | 3.895386 | 4.230892 | 4.536056  |
| ENSMUSG Rnf10     | 72.17132 | 67.73486 | 67.68796 | 57.93448 | 61.83989 | 63.873234 |
| ENSMUSG Pde3a     | 10.51767 | 9.007065 | 8.418457 | 6.373232 | 7.114182 | 6.014777  |
| ENSMUSG Zc3hav1l  | 1.891333 | 1.700778 | 1.473022 | 1.43952  | 1.547553 | 1.180838  |
| ENSMUSG Fbxo40    | 0.192314 | 0.387681 | 0.106946 | 0.298575 | 0.081371 | 0.116277  |
| ENSMUSG Rnf150    | 2.980945 | 2.824113 | 2.789017 | 2.198621 | 2.690225 | 2.469127  |
| ENSMUSG Kctd19    | 0.242319 | 0.140336 | 0.145436 | 0.099968 | 0        | 0.032879  |
| ENSMUSG Ift80     | 5.309279 | 6.563679 | 5.312121 | 7.168955 | 5.958012 | 6.674997  |
| ENSMUSG Ppp1r14b  | 9.29515  | 11.18168 | 12.07343 | 14.77225 | 15.0585  | 16.07065  |
| ENSMUSG Dhx36     | 8.208602 | 8.571585 | 7.695364 | 7.747279 | 7.578978 | 6.946689  |
| ENSMUSG Schip1    | 15.09541 | 15.46482 | 15.25843 | 12.34175 | 13.0217  | 10.320006 |
| ENSMUSG Il12a     | 0.797799 | 0.439716 | 1.117468 | 0.947807 | 0.583861 | 0.479204  |
| ENSMUSG Mfsd1     | 28.02949 | 28.05869 | 26.02186 | 29.93474 | 34.3101  | 32.494316 |
| ENSMUSG Gfm1      | 9.84085  | 8.680048 | 8.576865 | 7.852149 | 7.489737 | 8.342852  |
| ENSMUSG Vpreb3    | 18.22735 | 20.98486 | 14.09891 | 21.99738 | 17.0835  | 18.786933 |
| ENSMUSG Smarcb1   | 29.16924 | 27.9105  | 31.85602 | 25.99413 | 26.30371 | 29.778794 |
| ENSMUSG Mmp11     | 14.52837 | 12.37396 | 12.27283 | 10.72197 | 10.39578 | 9.554955  |
| ENSMUSG Eif1a     | 21.52323 | 20.32854 | 21.48318 | 22.28894 | 21.46216 | 22.578777 |
| ENSMUSG Olfr1508  | 0        | 0        | 0        | 0        | 0        | 0         |
| Mus_musc Mus_musc | 0        | 0.322734 | 0        | 0        | 0.27592  | 0         |
| ENSMUSG Emg1      | 25.60247 | 27.22538 | 30.81609 | 31.10191 | 31.50155 | 28.357267 |
| ENSMUSG Ptpn6     | 24.52139 | 20.92565 | 29.69586 | 34.95017 | 32.25736 | 35.363765 |
| ENSMUSG Eno2      | 0.643815 | 1.178792 | 1.213079 | 1.329856 | 1.570675 | 1.879972  |
| ENSMUSG Phb2      | 48.55219 | 48.88886 | 49.85445 | 54.20727 | 53.74637 | 59.366875 |
| ENSMUSG Tacstd2   | 21.78585 | 18.75494 | 24.23684 | 16.23696 | 14.82133 | 17.736233 |
| ENSMUSG Zbtb22    | 13.18264 | 13.22027 | 11.28593 | 11.80629 | 10.98945 | 11.019043 |
| ENSMUSG Atn1      | 23.84293 | 23.29688 | 23.77323 | 21.63682 | 19.2618  | 20.648308 |
| ENSMUSG Olfr1402  | 0.178423 | 0.13873  | 0.236119 | 0.055199 | 0.182406 | 0.19478   |
| ENSMUSG Rfesd     | 4.878131 | 4.400775 | 4.51924  | 5.082944 | 4.326257 | 4.137996  |

|                    |          |          |          |          |          |           |
|--------------------|----------|----------|----------|----------|----------|-----------|
| Mus_musc Mus_musc  | 0.107242 | 0        | 0.096351 | 1.946949 | 2.038866 | 1.754975  |
| Mus_musc Mus_musc  | 0        | 0        | 0        | 0.979836 | 1.892394 | 1.835018  |
| Mus_musc Mus_musc  | 0.640002 | 0.765328 | 0.969408 | 0.806935 | 0.613948 | 0.825175  |
| Mus_musc Mus_musc  | 0.091771 | 0.06491  | 0.060504 | 2.352834 | 1.820175 | 1.707164  |
| ENSMUSG Mfhas1     | 10.88949 | 11.43348 | 11.53223 | 8.243634 | 8.911523 | 9.006213  |
| Mus_musc Mus_musc  | 0        | 0        | 0        | 0        | 0        | 0         |
| Mus_musc Mus_musc  | 0        | 0        | 0        | 0        | 0        | 0.29868   |
| ENSMUSG Tex13b     | 0        | 0        | 0        | 0        | 0        | 0         |
| Mus_musc Mus_musc  | 0        | 0        | 0        | 0.171227 | 0.132371 | 0.293626  |
| ENSMUSG Aspa       | 0.994605 | 2.831856 | 1.999913 | 2.105441 | 2.157618 | 1.837759  |
| Mus_musc Mus_musc  | 0.392564 | 0        | 0.219207 | 0.463437 | 0.71966  | 0.851977  |
| Mus_musc Mus_musc  | 0        | 0        | 0        | 0.152422 | 0.170984 | 0.184484  |
| Mus_musc Mus_musc  | 0.159611 | 0        | 0        | 0.187286 | 0        | 0         |
| Mus_musc Mus_musc  | 0        | 0.182136 | 0        | 0.094893 | 0        | 0         |
| Mus_musc Mus_musc  | 0        | 0        | 0        | 0.055807 | 0        | 0         |
| ENSMUSG Tsen2      | 2.865983 | 2.064564 | 2.718733 | 2.145151 | 2.537063 | 2.347759  |
| ENSMUSG Krt1       | 0.132273 | 0.075426 | 0        | 0.118062 | 0.132092 | 0.137671  |
| ENSMUSG Brox       | 24.58461 | 24.0002  | 23.12128 | 21.76874 | 22.06048 | 21.425625 |
| ENSMUSG Ier5l      | 4.064717 | 3.125237 | 2.820472 | 2.675036 | 2.330627 | 2.73403   |
| ENSMUSG Tmsb15b1   | 0.571687 | 0.275811 | 0.401112 | 0.565358 | 0.434622 | 0.582954  |
| ENSMUSG Pld6       | 0.257254 | 0.535362 | 0.278531 | 0.472676 | 0.553972 | 0.660395  |
| Mus_musc Mus_musc  | 1.645424 | 1.924043 | 2.092093 | 2.299312 | 3.34048  | 2.722847  |
| Mus_musc Mus_musc  | 2.00457  | 1.183131 | 1.831672 | 0.907612 | 0.66611  | 0.58192   |
| ENSMUSG Vmn1r231   | 0        | 0        | 0        | 0        | 0        | 0         |
| Mus_musc Mus_musc  | 0        | 0        | 0        | 0.358342 | 0.25976  | 0.549252  |
| Mus_musc Mus_musc  | 0.506324 | 0.722781 | 0.797239 | 0.434466 | 1.035942 | 0.524014  |
| ENSMUSG Map10      | 0.912924 | 0.952605 | 1.151265 | 1.080748 | 1.291667 | 0.821086  |
| ENSMUSG Cbx5       | 18.50778 | 19.78817 | 16.15738 | 14.14209 | 14.52227 | 13.578554 |
| ENSMUSG Mrgprb3    | 0        | 0        | 0        | 0        | 0        | 0         |
| Mus_musc Mus_musc  | 0        | 0.27231  | 0.029315 | 0        | 0.238307 | 0         |
| Mus_musc Mus_musc  | 0        | 0.200981 | 0        | 0        | 0.239294 | 0.153644  |
| ENSMUSG Mdk        | 4.036101 | 3.316807 | 3.944179 | 5.642773 | 4.569888 | 5.76737   |
| Mus_musc Mus_musc  | 0.237591 | 1.083615 | 0.686574 | 0.639354 | 1.16787  | 1.587823  |
| Mus_musc Mus_musc  | 0.317147 | 1.952871 | 1.425034 | 0.353595 | 0.385179 | 1.624913  |
| Mus_musc Mus_musc  | 0        | 0        | 0        | 0        | 0        | 0         |
| Mus_musc Mus_musc  | 0.190352 | 0.102503 | 1.863688 | 0        | 0        | 0.060105  |
| Mus_musc Mus_musc  | 0        | 0.280391 | 0        | 0.297631 | 0        | 0         |
| Mus_musc Mus_musc  | 0        | 0        | 0.492867 | 0        | 0        | 0         |
| ENSMUSG A630023A   | 0        | 0        | 0        | 0        | 0.056684 | 0.104534  |
| ENSMUSG G6pdx      | 18.04302 | 16.71958 | 19.98769 | 19.1165  | 21.36752 | 22.382767 |
| ENSMUSG Gm7951     | 0        | 0        | 0        | 0        | 0        | 0         |
| ENSMUSG Ifna1      | 0        | 0        | 0        | 0        | 0        | 0         |
| Mus_musc Mus_musc  | 0        | 0        | 0        | 0.165592 | 0.113358 | 0.336528  |
| ENSMUSG Gm21680    | 0        | 0        | 0        | 0        | 0.0417   | 0         |
| Mus_musc Mus_musc  | 0        | 0        | 0        | 0        | 0        | 0.296953  |
| Mus_musc Mus_musc  | 0        | 0        | 0        | 0        | 0        | 0         |
| Mus_musc Mus_musc  | 0.254302 | 0        | 0.088234 | 0        | 0        | 0         |
| ENSMUSG Vmn1r149   | 0        | 0        | 0        | 0        | 0        | 0         |
| ENSMUSG Gm8212     | 0        | 0        | 0        | 0        | 0        | 0         |
| ENSMUSG Leprot     | 64.3599  | 56.48403 | 61.96891 | 57.11248 | 54.74129 | 55.494392 |
| ENSMUSG Xrra1      | 0.260434 | 0.24828  | 0.279586 | 0.301263 | 0.383454 | 0.178896  |
| ENSMUSG Lsm7       | 5.463931 | 13.27062 | 16.15625 | 17.16681 | 10.0925  | 15.199667 |
| ENSMUSG Sliitrk6   | 0.815054 | 0.559226 | 0.732004 | 0.919249 | 0.706525 | 0.46759   |
| ENSMUSG Adra1a     | 2.189881 | 2.472751 | 2.200758 | 2.544551 | 2.534143 | 2.426239  |
| ENSMUSG Mettl25    | 3.160235 | 2.802892 | 2.57536  | 2.581634 | 2.116405 | 2.432386  |
| ENSMUSG Mrpl18     | 20.41428 | 21.83204 | 20.53156 | 26.29715 | 23.8868  | 25.124199 |
| ENSMUSG Ripor2     | 6.291301 | 4.185791 | 5.768019 | 6.092374 | 4.220658 | 5.553651  |
| ENSMUSG Fam214b    | 8.523858 | 8.300653 | 12.4322  | 9.343616 | 9.26831  | 7.702558  |
| ENSMUSG Gm28230    | 0.039534 | 0        | 0        | 0        | 0.01857  | 0         |
| ENSMUSG Gm44       | 0        | 0        | 0        | 0        | 0        | 0         |
| ENSMUSG Gm3269     | 0        | 0        | 0        | 0        | 0        | 0         |
| ENSMUSG Vmn2r97    | 0        | 0        | 0        | 0        | 0        | 0         |
| ENSMUSG Triml2     | 0        | 0        | 0        | 0        | 0        | 0         |
| ENSMUSG Olfr364-ps | 0        | 0        | 0        | 0        | 0        | 0         |

|                   |          |          |          |          |          |           |
|-------------------|----------|----------|----------|----------|----------|-----------|
| ENSMUSG Gm28434   | 0        | 0        | 0        | 0        | 0        | 0         |
| ENSMUSG Scube1    | 6.375189 | 6.781459 | 6.05829  | 4.784481 | 4.906963 | 4.488005  |
| ENSMUSG Olfr1321  | 0        | 0        | 0        | 0        | 0        | 0         |
| Mus_musc Mus_musc | 0.511745 | 0.750504 | 0.659427 | 0.832905 | 0.595718 | 0.58521   |
| ENSMUSG Klhdc7a   | 2.705081 | 3.851525 | 2.541793 | 4.252953 | 4.002084 | 4.495706  |
| ENSMUSG Fam43b    | 0        | 0        | 0        | 0        | 0        | 0         |
| Mus_musc Mus_musc | 1.344    | 1.171386 | 1.589924 | 0.895312 | 0.862248 | 1.18079   |
| Mus_musc Mus_musc | 0.12027  | 0.306572 | 0.352236 | 0.46531  | 0.222516 | 0.557013  |
| Mus_musc Mus_musc | 47.63315 | 49.17099 | 45.35762 | 39.77163 | 38.7195  | 38.613163 |
| Mus_musc Mus_musc | 0.860214 | 0.885464 | 0.957588 | 0.296952 | 0.217298 | 0.176705  |
| Mus_musc Mus_musc | 0.174546 | 0.168064 | 0.078929 | 0.077202 | 0.195707 | 0.232912  |
| Mus_musc Mus_musc | 0        | 0.154309 | 0        | 0        | 0        | 0         |
| Mus_musc Mus_musc | 0.326145 | 0.235635 | 0.420916 | 0.088185 | 0        | 0.136633  |
| Mus_musc Mus_musc | 0        | 0        | 0        | 0        | 0        | 0         |
| Mus_musc Mus_musc | 2.108678 | 2.331167 | 1.84412  | 0.9665   | 1.157001 | 0.81734   |
| ENSMUSG Amy2a2    | 0        | 0        | 0        | 0        | 0        | 0         |
| ENSMUSG Gm29564   | 0        | 0        | 0        | 0        | 0        | 0         |
| ENSMUSG Gm17374   | 0        | 0        | 0        | 0        | 0        | 0         |
| ENSMUSG Olfr1306  | 0        | 0        | 0        | 0        | 0        | 0         |
| ENSMUSG Cacnb4    | 0.270514 | 0.343945 | 0.269764 | 0.259617 | 0.186306 | 0.329363  |
| ENSMUSG Plxdc1    | 3.53687  | 3.517394 | 5.020383 | 2.789354 | 3.351517 | 3.722439  |
| ENSMUSG Arl5b     | 10.6254  | 10.18464 | 9.081499 | 7.136314 | 7.543799 | 7.050573  |
| ENSMUSG Ptger2    | 1.409623 | 1.406836 | 1.397346 | 1.746467 | 2.263467 | 2.303178  |
| ENSMUSG Ppp1r16b  | 34.79033 | 38.72061 | 40.91481 | 24.32914 | 25.82643 | 25.982707 |
| ENSMUSG Mpv17     | 32.206   | 29.06112 | 22.9354  | 27.03647 | 22.92145 | 25.021292 |
| ENSMUSG Gm9495    | 0        | 0        | 0        | 0        | 0        | 0         |
| ENSMUSG Fam222b   | 8.704925 | 8.452107 | 8.933599 | 6.233174 | 8.653478 | 7.428174  |
| ENSMUSG Xkr8      | 2.204198 | 2.331869 | 2.132257 | 1.87425  | 2.460645 | 1.76962   |
| ENSMUSG Csn3      | 0        | 0        | 0        | 0.113939 | 0.873532 | 0.345009  |
| ENSMUSG Adm2      | 0.063015 | 0        | 0        | 0.067166 | 0.043149 | 0.186619  |
| ENSMUSG Umodl1    | 0        | 0        | 0        | 0        | 0        | 0         |
| ENSMUSG Gm29049   | 0        | 0        | 0        | 0        | 0        | 0         |
| ENSMUSG Cdx4      | 0        | 0        | 0        | 0        | 0        | 0         |
| ENSMUSG Fam149b   | 11.05001 | 9.523579 | 9.555183 | 9.01098  | 9.721127 | 9.118642  |
| ENSMUSG Olfr1223  | 0        | 0        | 0        | 0        | 0        | 0         |
| ENSMUSG Olfr809   | 0        | 0        | 0        | 0        | 0        | 0         |
| ENSMUSG Tbc1d20   | 33.57452 | 31.33217 | 32.34619 | 30.42857 | 33.79961 | 33.32854  |
| ENSMUSG Dynlt1c   | 15.15792 | 15.68691 | 17.15514 | 17.99583 | 17.33287 | 16.66721  |
| ENSMUSG Esx1      | 0        | 0        | 0        | 0        | 0        | 0         |
| ENSMUSG Ube2i     | 125.7513 | 125.4169 | 127.3618 | 112.4734 | 117.0223 | 121.69579 |
| ENSMUSG Unkl      | 8.612584 | 9.348021 | 8.796336 | 7.451432 | 6.70832  | 7.242747  |
| ENSMUSG Tsr3      | 10.11737 | 10.54057 | 11.87343 | 7.322333 | 9.406574 | 9.579754  |
| ENSMUSG Gm10112   | 0        | 0        | 0        | 0        | 0        | 0         |
| ENSMUSG Cd244a    | 1.008751 | 0.677196 | 1.818762 | 0.85349  | 0.758395 | 0.641453  |
| ENSMUSG Tfap2a    | 0.058076 | 0.116783 | 0        | 0.143026 | 0.117894 | 0.095711  |
| ENSMUSG Exoc2     | 12.62052 | 13.11473 | 12.40217 | 12.90021 | 12.27997 | 12.330959 |
| ENSMUSG Irf4      | 1.429895 | 1.108212 | 0.760027 | 12.67682 | 12.34848 | 11.327933 |
| ENSMUSG Gabrq     | 0.673055 | 0.575905 | 0.241665 | 0.140842 | 0.090117 | 0.152055  |
| ENSMUSG Cetn2     | 22.38534 | 23.07933 | 18.33931 | 21.19875 | 20.23323 | 20.463783 |
| ENSMUSG Gabre     | 0.857189 | 0.675434 | 0.662876 | 0.330251 | 0.218993 | 0.376799  |
| ENSMUSG Gabra3    | 1.856233 | 2.447921 | 1.567042 | 1.201386 | 0.985794 | 1.501153  |
| ENSMUSG Gpm6b     | 15.47127 | 14.94211 | 15.83913 | 13.29141 | 15.89718 | 12.595817 |
| ENSMUSG Nsdhl     | 9.660289 | 10.34046 | 9.644867 | 13.07397 | 13.07927 | 14.689108 |
| Mus_musc Mus_musc | 5.090383 | 2.229235 | 1.108179 | 187.8028 | 30.75199 | 91.564507 |
| Mus_musc Mus_musc | 0.230359 | 0.124048 | 0.355912 | 0.304468 | 0.191295 | 0.172189  |
| Mus_musc Mus_musc | 0.314408 | 0.521912 | 0.30482  | 0.529772 | 0.490406 | 0.411583  |
| Mus_musc Mus_musc | 0.097794 | 0.099407 | 0.222053 | 0.257116 | 0.157342 | 0.079683  |
| Mus_musc Mus_musc | 0        | 0        | 0        | 0        | 0.336841 | 0         |
| ENSMUSG Gm31371   | 0.071953 | 0.083446 | 0.036328 | 0.036021 | 0        | 0         |
| ENSMUSG Olfr837   | 0        | 0        | 0        | 0        | 0        | 0         |
| ENSMUSG Iqcn      | 0.078023 | 0.070355 | 0.081041 | 0.108001 | 0.02912  | 0.02238   |
| ENSMUSG Gm37797   | 0        | 0        | 0        | 0        | 0        | 0         |
| ENSMUSG Vmn2r66   | 0        | 0        | 0        | 0        | 0        | 0         |
| ENSMUSG Slc16a11  | 18.67145 | 18.50038 | 9.850702 | 10.85048 | 8.91331  | 8.509801  |

|                   |          |          |          |          |          |           |
|-------------------|----------|----------|----------|----------|----------|-----------|
| ENSMUSG 3110021N  | 0.037396 | 0.062834 | 0.065839 | 0        | 0        | 0.045299  |
| ENSMUSG Rab28     | 29.663   | 28.75423 | 32.17549 | 25.84407 | 23.9962  | 24.445009 |
| ENSMUSG Dgcr8     | 9.386969 | 8.790684 | 9.40478  | 8.066644 | 8.00193  | 8.340816  |
| ENSMUSG Psme2b    | 23.01484 | 21.68852 | 42.76889 | 40.61864 | 37.85305 | 30.82015  |
| ENSMUSG Ppp2r2c   | 1.394045 | 0.893846 | 0.925058 | 0.386215 | 0.332648 | 0.522462  |
| ENSMUSG Crmp1     | 0.260631 | 0.307529 | 0.197131 | 0.844691 | 0.702827 | 0.798225  |
| ENSMUSG Usp7      | 33.00461 | 32.59297 | 33.49749 | 26.13532 | 28.15645 | 26.890518 |
| ENSMUSG Stk32b    | 0.089394 | 0.225127 | 0.037227 | 0.271592 | 0.259631 | 0.193348  |
| ENSMUSG Stx18     | 8.526353 | 8.682114 | 8.093393 | 10.65742 | 7.165523 | 7.729049  |
| ENSMUSG Nsg1      | 19.9728  | 19.63448 | 24.98193 | 13.65501 | 13.59934 | 12.444351 |
| ENSMUSG Zbtb49    | 3.609537 | 3.352726 | 3.065465 | 4.047736 | 3.211379 | 3.890564  |
| ENSMUSG Zfp384    | 14.54552 | 14.13229 | 14.07184 | 13.27112 | 13.59841 | 14.235132 |
| ENSMUSG Tcte2     | 1.205856 | 0.71309  | 1.063051 | 0.776853 | 0.545692 | 0.913577  |
| ENSMUSG Txlng     | 8.580603 | 7.990176 | 8.097121 | 8.069155 | 7.188285 | 6.235951  |
| ENSMUSG Mlxip     | 13.54087 | 12.68224 | 13.13973 | 11.27042 | 11.69115 | 10.646241 |
| ENSMUSG Slu7      | 19.73636 | 19.31812 | 20.16419 | 18.48776 | 17.14361 | 17.471303 |
| ENSMUSG Fabp6     | 0        | 0        | 0        | 0        | 0        | 0         |
| ENSMUSG Upp1      | 10.51647 | 12.38168 | 16.65837 | 14.1006  | 11.37485 | 13.596927 |
| ENSMUSG Tnip1     | 14.02537 | 13.41928 | 15.00566 | 20.2956  | 19.03986 | 20.759884 |
| ENSMUSG Fam71b    | 0.105848 | 0.086583 | 0.06742  | 0.176485 | 0.19498  | 0.364832  |
| ENSMUSG Vdac1     | 54.1575  | 58.44385 | 55.96985 | 52.07518 | 52.80825 | 53.953166 |
| ENSMUSG Plcl1     | 3.69679  | 3.850444 | 3.420135 | 2.321304 | 2.731709 | 2.372322  |
| ENSMUSG Ppie      | 13.11401 | 14.37014 | 14.9918  | 12.16634 | 12.6521  | 13.322805 |
| ENSMUSG Trit1     | 3.861595 | 3.208725 | 3.968534 | 4.635634 | 3.553501 | 4.050588  |
| ENSMUSG Mfsd2a    | 2.008072 | 1.096815 | 1.282297 | 2.604762 | 2.747068 | 2.937732  |
| ENSMUSG Mycl      | 5.32994  | 5.742542 | 3.258934 | 5.057487 | 4.402214 | 5.111159  |
| ENSMUSG Ppt1      | 45.38832 | 43.48096 | 46.49318 | 47.42616 | 55.048   | 49.774319 |
| ENSMUSG Cap1      | 137.8524 | 133.9854 | 143.8616 | 137.006  | 142.7887 | 147.18711 |
| Mus_musc Mus_musc | 0.451191 | 0.561156 | 0.214507 | 0.437005 | 0        | 0.059455  |
| Mus_musc Mus_musc | 13.04725 | 13.30825 | 19.1177  | 11.98773 | 14.57698 | 11.753837 |
| Mus_musc Mus_musc | 0        | 0.100201 | 0.047536 | 0        | 0.063578 | 0         |
| Mus_musc Mus_musc | 0        | 0        | 0        | 0.238436 | 0        | 0.356587  |
| Mus_musc Mus_musc | 0        | 0.115559 | 0        | 0.061647 | 0.245295 | 0         |
| Mus_musc Mus_musc | 0        | 0        | 0        | 0.106655 | 0        | 0.368372  |
| Mus_musc Mus_musc | 1.227819 | 0.838583 | 0.817742 | 1.060314 | 1.089142 | 1.221776  |
| ENSMUSG Olfr777   | 0        | 0        | 0        | 0        | 0        | 0         |
| ENSMUSG Mms19     | 5.346313 | 6.402932 | 6.911775 | 6.69196  | 6.200598 | 5.943241  |
| ENSMUSG Rfng      | 9.775493 | 9.119729 | 9.8502   | 8.172361 | 9.315608 | 8.171202  |
| ENSMUSG Gm21411   | 0        | 0        | 0        | 0        | 0        | 0         |
| ENSMUSG Dus1l     | 15.57724 | 14.53612 | 16.17809 | 16.44699 | 14.86423 | 13.665494 |
| ENSMUSG Arhgap19  | 1.273713 | 1.596624 | 2.048711 | 1.86611  | 2.386962 | 2.538512  |
| ENSMUSG Zdhhc16   | 8.057549 | 9.554412 | 9.906618 | 8.275766 | 9.686235 | 9.528006  |
| ENSMUSG Gps1      | 30.30539 | 27.41066 | 29.23417 | 23.93034 | 24.29098 | 26.367418 |
| ENSMUSG Maged1    | 44.81612 | 48.33767 | 44.20657 | 45.6005  | 44.53883 | 47.374054 |
| ENSMUSG Cbr2      | 3135.786 | 2960.67  | 2378.024 | 1520.555 | 1366.747 | 1469.6283 |
| ENSMUSG Fasn      | 46.20443 | 54.51825 | 42.78526 | 68.25337 | 63.35988 | 78.638356 |
| ENSMUSG Tln1      | 74.98323 | 63.56699 | 72.46468 | 56.85241 | 56.64124 | 57.728508 |
| ENSMUSG Zbtb12    | 3.898253 | 4.394887 | 4.607564 | 4.862804 | 4.134753 | 5.127243  |
| ENSMUSG Ubqln5    | 0        | 0        | 0        | 0        | 0        | 0         |
| ENSMUSG Slco4a1   | 0.166792 | 0.300458 | 0.376007 | 1.402044 | 1.112525 | 1.177415  |
| ENSMUSG Pdk2      | 18.95819 | 20.74253 | 18.7723  | 17.47355 | 18.35782 | 17.733913 |
| ENSMUSG Ube2l3    | 34.74793 | 37.20878 | 36.14095 | 42.2246  | 41.48627 | 38.775134 |
| ENSMUSG Kik1b16   | 0        | 0        | 0        | 0        | 0        | 0         |
| ENSMUSG Atg4a-ps  | 0.150603 | 0.445491 | 0.26247  | 0.149662 | 0.551603 | 0.12671   |
| ENSMUSG Hsd12     | 13.06351 | 15.19633 | 12.45294 | 12.26876 | 11.67323 | 11.198957 |
| ENSMUSG Ptbp3     | 30.61069 | 30.19302 | 28.5049  | 29.61979 | 30.28119 | 27.832232 |
| ENSMUSG Ugcg      | 12.12194 | 11.1904  | 15.26838 | 11.21032 | 13.6503  | 11.08439  |
| ENSMUSG Slc46a2   | 0        | 0        | 0        | 0        | 0        | 0         |
| ENSMUSG Snx30     | 4.583144 | 4.198651 | 4.483137 | 5.844697 | 6.128685 | 6.186721  |
| ENSMUSG Zfp37     | 3.549793 | 4.182177 | 3.043885 | 2.923606 | 2.762844 | 2.363162  |
| ENSMUSG Tex12     | 0        | 0        | 0        | 0        | 0        | 0         |
| ENSMUSG Dixdc1    | 3.913648 | 4.532076 | 2.736132 | 3.286824 | 3.126675 | 3.083492  |
| ENSMUSG Pts       | 21.75888 | 22.69932 | 21.48558 | 19.65424 | 19.58177 | 20.111909 |
| ENSMUSG Bco2      | 0.149324 | 0.205454 | 0.132565 | 0.171223 | 0.201501 | 0.106007  |

|                   |          |          |          |          |          |           |
|-------------------|----------|----------|----------|----------|----------|-----------|
| ENSMUSG Cryab     | 197.6868 | 184.0107 | 204.6714 | 114.8068 | 106.9966 | 107.19537 |
| ENSMUSG 2310030G  | 13.59376 | 14.28705 | 13.01669 | 9.840704 | 9.063563 | 9.265946  |
| ENSMUSG Pkdrej    | 0.173447 | 0.154375 | 0.101864 | 0.109636 | 0.159792 | 0.16685   |
| ENSMUSG Plet1     | 45.71292 | 45.55808 | 42.82888 | 33.63526 | 42.40061 | 32.879323 |
| ENSMUSG Duox2     | 0.109958 | 0.107673 | 0.082086 | 0.127937 | 0.167939 | 0.14016   |
| ENSMUSG Uty       | 5.184294 | 4.882476 | 4.546296 | 5.091933 | 5.209645 | 4.520592  |
| ENSMUSG Psors1c2  | 0        | 0        | 0.06012  | 0        | 0        | 0         |
| ENSMUSG Ctsq      | 0        | 0        | 0        | 0        | 0        | 0         |
| ENSMUSG Defa17    | 0        | 0        | 0        | 0        | 0        | 0         |
| ENSMUSG Zfp462    | 2.044093 | 1.689317 | 1.611263 | 1.454283 | 1.277741 | 1.704948  |
| ENSMUSG Olfr678   | 0        | 0        | 0        | 0        | 0        | 0         |
| ENSMUSG Gm5868    | 0        | 0.030929 | 0.033738 | 0        | 0        | 0         |
| ENSMUSG Snrnp48   | 6.421224 | 7.824195 | 7.88077  | 8.052119 | 6.631864 | 6.572721  |
| ENSMUSG Riok3     | 28.16991 | 27.92098 | 29.2753  | 24.42708 | 25.38409 | 24.943076 |
| ENSMUSG Olfr665   | 0        | 0        | 0        | 0        | 0        | 0         |
| ENSMUSG Olfr677   | 0        | 0        | 0        | 0        | 0        | 0         |
| ENSMUSG Spink7    | 0        | 0        | 0        | 0        | 0        | 0         |
| ENSMUSG Spinkl    | 0        | 0        | 0        | 0        | 0        | 0         |
| ENSMUSG Vmn2r43   | 0        | 0        | 0        | 0        | 0        | 0         |
| ENSMUSG Fcer1a    | 0.169567 | 0.090606 | 0.124925 | 0.395808 | 0.300429 | 0.238446  |
| ENSMUSG Cadm3     | 0.210973 | 0.291292 | 0.502984 | 0.135056 | 0.195555 | 0.256457  |
| ENSMUSG Frmpd4    | 0.019225 | 0        | 0.013347 | 0.009725 | 0.049173 | 0.037834  |
| ENSMUSG Myoz3     | 0        | 0        | 0        | 0        | 0        | 0         |
| Mus_musc Mus_musc | 2.194243 | 1.853069 | 1.356193 | 0.295481 | 0.353275 | 0.738226  |
| ENSMUSG Nup93     | 7.630517 | 8.805922 | 8.587893 | 8.54365  | 9.927184 | 9.22419   |
| ENSMUSG Hspa13    | 10.37031 | 11.14401 | 11.14446 | 13.19012 | 13.48107 | 13.794104 |
| ENSMUSG Fshr      | 0        | 0        | 0        | 0        | 0        | 0         |
| ENSMUSG Camkv     | 0.043034 | 0        | 0        | 0.047633 | 0        | 0.050641  |
| ENSMUSG Cdkl3     | 1.285043 | 1.423369 | 0.909547 | 1.344947 | 0.929202 | 1.208852  |
| ENSMUSG Pdlim4    | 2.063751 | 1.895941 | 1.988216 | 5.91067  | 5.73155  | 5.992599  |
| ENSMUSG Triobp    | 31.3986  | 31.32146 | 36.16585 | 27.46917 | 27.10775 | 26.640074 |
| ENSMUSG Prrg4     | 0.31164  | 0.305895 | 0.285933 | 0.869329 | 1.027761 | 0.622045  |
| ENSMUSG Eif3m     | 48.74876 | 42.37462 | 45.64513 | 50.04559 | 49.60418 | 52.849617 |
| ENSMUSG Mrnip     | 0.980696 | 0.654748 | 0.792187 | 0.948935 | 1.176416 | 0.923555  |
| ENSMUSG Rad50     | 6.673748 | 6.252933 | 6.645095 | 6.164981 | 5.978448 | 5.553181  |
| ENSMUSG Jade2     | 20.87367 | 22.05345 | 20.2667  | 13.5958  | 14.49771 | 12.800261 |
| ENSMUSG Sar1b     | 35.63095 | 35.52612 | 32.74011 | 32.25654 | 34.42215 | 33.229313 |
| ENSMUSG Clk4      | 22.71068 | 21.65609 | 23.55864 | 18.43166 | 18.23902 | 17.035175 |
| ENSMUSG Tbc1d4    | 4.922659 | 5.52093  | 4.441268 | 5.54689  | 5.816556 | 6.010242  |
| Mus_musc Mus_musc | 0        | 0.052067 | 0        | 0        | 0.506245 | 0.254245  |
| Mus_musc Mus_musc | 0.123405 | 0.068544 | 0.112561 | 0.481371 | 0.099307 | 0.124461  |
| ENSMUSG Tyrobp    | 52.72965 | 46.57479 | 70.69532 | 91.29925 | 87.29482 | 109.97263 |
| ENSMUSG Cd22      | 7.817139 | 6.532942 | 6.678556 | 15.5178  | 13.63222 | 16.240421 |
| ENSMUSG Drc3      | 6.897479 | 8.342597 | 5.252221 | 10.45122 | 9.835293 | 9.067822  |
| ENSMUSG Dnaja3    | 17.08453 | 17.2649  | 17.04139 | 15.73052 | 15.90404 | 15.626017 |
| ENSMUSG Mfap1b    | 18.83473 | 19.54464 | 19.14429 | 16.87254 | 15.76109 | 14.593464 |
| Mus_musc Mus_musc | 0.50732  | 0        | 0        | 0        | 0        | 0.140818  |
| ENSMUSG Olfr1212  | 0        | 0        | 0        | 0        | 0        | 0         |
| Mus_musc Mus_musc | 1.268326 | 1.294661 | 1.640445 | 0.640107 | 0.502771 | 0.492021  |
| Mus_musc Mus_musc | 0        | 0        | 0        | 0.111488 | 0        | 0         |
| Mus_musc Mus_musc | 0        | 0        | 0        | 0        | 0        | 0         |
| Mus_musc Mus_musc | 0.078455 | 0        | 0        | 0.056876 | 0.140214 | 0.058407  |
| ENSMUSG Mvd       | 7.467103 | 7.341865 | 9.720065 | 13.91768 | 14.56984 | 17.530392 |
| ENSMUSG Ugt3a1    | 0        | 0        | 0        | 0        | 0        | 0         |
| ENSMUSG Spef2     | 1.51865  | 2.166171 | 0.654987 | 2.218506 | 2.5375   | 2.147656  |
| ENSMUSG Mansc4    | 0        | 0.109473 | 0.130644 | 0.255533 | 0.507954 | 0.219242  |
| ENSMUSG Cyba      | 86.08845 | 86.97437 | 106.8551 | 181.1019 | 182.6808 | 206.37846 |
| ENSMUSG Tex48     | 0        | 0        | 0        | 0        | 0        | 0         |
| ENSMUSG Gm2174    | 0.158096 | 0.057578 | 0.247521 | 0.058835 | 0.057587 | 0.241     |
| ENSMUSG Sin3b     | 19.67759 | 19.55626 | 23.20454 | 20.28194 | 20.71614 | 24.542282 |
| ENSMUSG Iqcm      | 0        | 0        | 0        | 0        | 0        | 0         |
| ENSMUSG Isx       | 0        | 0.064719 | 0        | 0.056194 | 0        | 0.053314  |
| ENSMUSG Sorbs2    | 0.797882 | 2.769736 | 1.106298 | 1.750894 | 1.848142 | 2.480139  |
| ENSMUSG Irf2      | 28.23815 | 27.42725 | 34.85486 | 27.19641 | 29.05588 | 24.550971 |

|                   |          |          |          |          |          |           |
|-------------------|----------|----------|----------|----------|----------|-----------|
| ENSMUSG Casp3     | 5.725685 | 6.674778 | 7.143304 | 11.00106 | 11.09464 | 11.908638 |
| ENSMUSG Cenpu     | 0.396957 | 0.774252 | 0.437136 | 0.741317 | 0.785965 | 0.866     |
| ENSMUSG Sult1c2   | 0.247517 | 0.153139 | 0.107713 | 0.083614 | 0.06068  | 0.019955  |
| ENSMUSG Gm853     | 0        | 0        | 0        | 0        | 0        | 0         |
| Mus_musc Mus_musc | 1.22892  | 1.709085 | 2.467433 | 1.050564 | 0.738235 | 0.332061  |
| ENSMUSG Ypel4     | 0.66428  | 0.337529 | 0.312823 | 0.204334 | 0.383744 | 0.149898  |
| ENSMUSG Myrfl     | 0        | 0        | 0.021197 | 0        | 0.021537 | 0.050121  |
| ENSMUSG Phka1     | 4.916215 | 4.167477 | 4.211517 | 4.717416 | 4.60182  | 4.957125  |
| ENSMUSG Gm1141    | 0        | 0.055634 | 0.113463 | 0        | 0        | 0.058349  |
| ENSMUSG Vma21     | 9.810972 | 9.997474 | 8.038152 | 8.601311 | 8.274581 | 8.341641  |
| ENSMUSG Tmem185   | 12.42045 | 14.20815 | 12.15158 | 12.46459 | 11.49976 | 14.204382 |
| ENSMUSG Nuak2     | 5.89872  | 5.044931 | 7.163236 | 7.10635  | 5.495527 | 6.473408  |
| ENSMUSG Epha5     | 0        | 0.013784 | 0        | 0        | 0.006573 | 0         |
| ENSMUSG Paics     | 46.44649 | 47.59533 | 42.59155 | 41.00041 | 42.17304 | 42.120973 |
| ENSMUSG Ppat      | 4.583406 | 5.258221 | 4.955604 | 4.940716 | 4.919941 | 5.27821   |
| ENSMUSG Rest      | 5.845163 | 5.722399 | 5.324474 | 6.695609 | 6.211679 | 6.689894  |
| ENSMUSG Thegl     | 0.10654  | 0.180342 | 0.169329 | 0.229639 | 0.293754 | 0.275904  |
| Mus_musc Mus_musc | 1.229108 | 1.403229 | 1.550683 | 0.978638 | 0.613348 | 0.780394  |
| Mus_musc Mus_musc | 0.681499 | 1.103876 | 0.416572 | 0.681634 | 0.703056 | 0.822549  |
| Mus_musc Mus_musc | 0.382915 | 0.330503 | 0.468155 | 1.371468 | 1.286028 | 1.126899  |
| Mus_musc Mus_musc | 1.394233 | 1.419118 | 0.530939 | 1.473083 | 0.899531 | 0.946176  |
| Mus_musc Mus_musc | 4.147286 | 3.858519 | 6.500279 | 24.65356 | 31.02925 | 29.82321  |
| Mus_musc Mus_musc | 0        | 0        | 0.045692 | 0        | 0.181133 | 0.260055  |
| Mus_musc Mus_musc | 0        | 0        | 0        | 0.223453 | 0.121887 | 0         |
| Mus_musc Mus_musc | 0        | 0        | 0        | 0        | 0        | 0         |
| Mus_musc Mus_musc | 0.211389 | 0.127473 | 0.092568 | 0.089869 | 0.104343 | 0         |
| Mus_musc Mus_musc | 7.069224 | 7.469932 | 9.581371 | 8.065866 | 6.591745 | 6.005143  |
| ENSMUSG Pycr1     | 0.337791 | 0.249913 | 0.237819 | 3.154405 | 3.579151 | 3.349227  |
| Mus_musc Mus_musc | 0.295619 | 0.260253 | 0.115285 | 0.238082 | 0        | 0.082471  |
| Mus_musc Mus_musc | 0.105919 | 0.090038 | 0.179785 | 0.072161 | 0.205533 | 0         |
| Mus_musc Mus_musc | 0.233851 | 0.68641  | 0.452244 | 0.783273 | 0.470164 | 0.253838  |
| Mus_musc Mus_musc | 0.188138 | 0.243462 | 0.386961 | 1.307837 | 0.852565 | 1.157436  |
| Mus_musc Mus_musc | 0.257556 | 0.347722 | 0.248421 | 0.122905 | 0.130423 | 0.061578  |
| Mus_musc Mus_musc | 0.060558 | 0.318309 | 0.170024 | 0        | 0.059525 | 0.525571  |
| Mus_musc Mus_musc | 0        | 0.023716 | 0        | 0        | 0        | 0         |
| Mus_musc Mus_musc | 1.049732 | 1.085312 | 0.937764 | 1.119329 | 1.026149 | 1.156215  |
| Mus_musc Mus_musc | 0        | 0        | 0        | 0        | 0        | 0         |
| ENSMUSG Hist1h3b  | 0.040639 | 0.533413 | 0.061035 | 0.262146 | 0.03779  | 0.08734   |
| ENSMUSG Hist1h4b  | 0.235474 | 0.453599 | 0.154681 | 0.394056 | 0.233013 | 0.411055  |
| ENSMUSG Hist1h3a  | 0        | 0        | 0.031636 | 0        | 0        | 0.0645    |
| ENSMUSG Hist1h2bf | 0.302237 | 0.491375 | 0.254687 | 0.286504 | 0.101357 | 0.29326   |
| ENSMUSG Lce1l     | 0        | 0        | 0        | 0        | 0        | 0         |
| ENSMUSG Tmem251   | 2.305298 | 2.50937  | 2.441622 | 2.262572 | 2.041695 | 2.781666  |
| ENSMUSG Mtrf1l    | 48.31824 | 46.47184 | 43.93148 | 38.41902 | 35.63802 | 37.009762 |
| ENSMUSG Cyp4a29   | 0        | 0        | 0        | 0        | 0        | 0         |
| ENSMUSG C87436    | 6.948351 | 7.939232 | 7.310611 | 6.414713 | 6.645856 | 6.328568  |
| ENSMUSG Olfr981   | 0        | 0        | 0        | 0        | 0        | 0         |
| ENSMUSG 6030468B  | 0        | 0.05014  | 0.042431 | 0.187015 | 0.229248 | 0.291002  |
| ENSMUSG Zbtb7a    | 31.5356  | 23.45813 | 21.84046 | 22.04334 | 26.54298 | 26.23897  |
| ENSMUSG Slitrk1   | 0        | 0        | 0        | 0        | 0        | 0         |
| ENSMUSG Hirip3    | 4.942092 | 4.922951 | 4.60855  | 5.102855 | 5.858684 | 5.242766  |
| ENSMUSG Alg10b    | 11.50618 | 11.71243 | 10.31074 | 9.804266 | 10.25449 | 10.399103 |
| Mus_musc Mus_musc | 0        | 0        | 0        | 0        | 0        | 0.184186  |
| Mus_musc Mus_musc | 0.644387 | 0.384773 | 0.878943 | 0.411427 | 0.142633 | 0.196451  |
| ENSMUSG Aqp12     | 0        | 0        | 0        | 0        | 0        | 0         |
| Mus_musc Mus_musc | 0.152733 | 0        | 0.267126 | 0        | 0        | 0.363053  |
| Mus_musc Mus_musc | 0.430391 | 0.132781 | 0.219723 | 0.198151 | 0.054781 | 0.171421  |
| Mus_musc Mus_musc | 0        | 0        | 0.242661 | 0.235204 | 0.149447 | 0.153412  |
| ENSMUSG Kmt5b     | 24.5165  | 25.73157 | 20.53897 | 20.50382 | 19.88867 | 18.586808 |
| Mus_musc Mus_musc | 0        | 0.267588 | 0        | 0.284662 | 0        | 0         |
| ENSMUSG Fam205a4  | 0        | 0.002074 | 0        | 0.002286 | 0.008221 | 0.001567  |
| ENSMUSG Gm20878   | 0.183366 | 0.021788 | 0.01669  | 0        | 0        | 0         |
| ENSMUSG Gm10985   | 0        | 0        | 0        | 0        | 0        | 0         |
| ENSMUSG Fndc7     | 0.59031  | 0.710019 | 0.537428 | 1.126004 | 1.19304  | 1.282311  |

|                   |          |          |          |          |          |           |
|-------------------|----------|----------|----------|----------|----------|-----------|
| Mus_musc Mus_musc | 0.093739 | 0.179295 | 0.320299 | 0.253596 | 0.322269 | 0.402896  |
| ENSMUSG Tlr9      | 1.275673 | 0.956291 | 1.363244 | 2.520782 | 1.710237 | 3.044104  |
| Mus_musc Mus_musc | 0        | 0        | 0        | 0        | 0        | 0         |
| ENSMUSG Fcnb      | 0        | 0        | 0        | 0        | 0        | 0         |
| ENSMUSG Cenpe     | 0.266834 | 0.27524  | 0.290075 | 0.742748 | 1.083642 | 1.322765  |
| ENSMUSG Abhd5     | 18.74218 | 20.34313 | 20.19707 | 19.10648 | 18.99003 | 19.886411 |
| ENSMUSG Ryk       | 43.62294 | 43.45125 | 43.09277 | 28.57404 | 31.61521 | 29.052469 |
| ENSMUSG 5-Mar     | 24.88094 | 24.25049 | 26.2347  | 24.85213 | 23.1123  | 24.415583 |
| ENSMUSG Slco2a1   | 149.4494 | 124.6504 | 124.2796 | 75.69937 | 85.19029 | 74.852791 |
| ENSMUSG Rab6b     | 3.876632 | 3.8475   | 3.563567 | 2.010483 | 1.586009 | 1.615814  |
| ENSMUSG Ctsg      | 0        | 0        | 0.085163 | 0        | 0        | 0         |
| ENSMUSG Cchcr1    | 2.045361 | 2.917294 | 3.079458 | 2.743009 | 2.439044 | 3.034798  |
| ENSMUSG Alx4      | 0.007595 | 0.006561 | 0.012665 | 0.014649 | 0.015796 | 0         |
| ENSMUSG Etf1      | 34.55373 | 36.25904 | 33.17928 | 33.3477  | 32.54624 | 34.631253 |
| ENSMUSG Sprr2b    | 0        | 0        | 0        | 0        | 0        | 0         |
| ENSMUSG Cyp21a1   | 0        | 0        | 0        | 0        | 0        | 0         |
| ENSMUSG Gfra3     | 0.056636 | 0.085134 | 0        | 0.051716 | 0        | 0.071751  |
| ENSMUSG Nelfe     | 12.42717 | 13.41356 | 13.5418  | 13.19779 | 11.8837  | 12.529077 |
| Mus_musc Mus_musc | 1.363356 | 1.644436 | 2.221498 | 1.362555 | 0.915897 | 0.993097  |
| Mus_musc Mus_musc | 0        | 0        | 0        | 0        | 0.315536 | 0         |
| Mus_musc Mus_musc | 1.138584 | 0.713309 | 1.058491 | 0.974239 | 0.545492 | 0.68937   |
| Mus_musc Mus_musc | 0.173211 | 0.371869 | 0.374495 | 0.275876 | 0        | 0.167951  |
| Mus_musc Mus_musc | 0        | 0.240076 | 0        | 0        | 0.218587 | 0.277748  |
| Mus_musc Mus_musc | 9.272463 | 9.450873 | 8.356938 | 5.061514 | 5.559143 | 5.683605  |
| Mus_musc Mus_musc | 0        | 0        | 0        | 0.124754 | 0        | 0         |
| Mus_musc Mus_musc | 0        | 0        | 0        | 0        | 0        | 0.184186  |
| ENSMUSG Armc4     | 1.196533 | 1.177293 | 0.788433 | 1.848351 | 2.077192 | 1.392528  |
| ENSMUSG Tbp12     | 0        | 0        | 0        | 0        | 0        | 0         |
| ENSMUSG Ttr       | 0        | 0        | 0        | 0        | 0        | 0         |
| ENSMUSG Pbsn      | 0        | 0        | 0        | 0        | 0        | 0         |
| ENSMUSG Gnai3     | 38.81942 | 41.17315 | 41.09861 | 42.43778 | 42.19121 | 44.282227 |
| ENSMUSG Jkamp     | 11.40433 | 11.51858 | 12.98787 | 12.50543 | 11.8784  | 11.086418 |
| ENSMUSG Neil1     | 3.74974  | 2.903331 | 2.843251 | 5.620052 | 5.573531 | 5.771875  |
| Mus_musc Mus_musc | 0        | 0        | 0        | 0        | 0        | 0.158919  |
| Mus_musc Mus_musc | 0.588662 | 0.310206 | 0        | 0        | 0.169406 | 0.202756  |
| Mus_musc Mus_musc | 0        | 0.295947 | 0        | 0.059004 | 0.072946 | 0.050499  |
| Mus_musc Mus_musc | 0.220026 | 0.481867 | 0.322322 | 0.207509 | 0.29436  | 0.202682  |
| Mus_musc Mus_musc | 0.703107 | 0.217309 | 0.337218 | 0        | 0.340822 | 0         |
| Mus_musc Mus_musc | 14.3481  | 18.63344 | 24.37268 | 21.4269  | 18.12236 | 21.65188  |
| Mus_musc Mus_musc | 0        | 0        | 0.235774 | 0        | 0        | 0         |
| ENSMUSG Rnase2b   | 0        | 0        | 0        | 0        | 0        | 0         |
| ENSMUSG Oc90      | 0        | 0        | 0        | 0        | 0        | 0.015051  |
| ENSMUSG Efr3a     | 16.57858 | 18.27767 | 16.22199 | 17.19033 | 17.94995 | 17.13316  |
| ENSMUSG Syn3      | 0.388415 | 0.475286 | 0.284584 | 0.356438 | 0.493255 | 0.620615  |
| ENSMUSG Gm11541   | 0        | 0.018267 | 0        | 0        | 0        | 0         |
| ENSMUSG Eya2      | 19.64109 | 19.64107 | 19.29506 | 16.41422 | 15.9785  | 18.737453 |
| ENSMUSG Ireb2     | 15.07966 | 14.73379 | 13.38289 | 13.4751  | 13.71898 | 13.450764 |
| ENSMUSG Olfr523   | 0        | 0.011115 | 0.012168 | 0        | 0        | 0         |
| ENSMUSG Spink14   | 0        | 0        | 0        | 0        | 0        | 0         |
| ENSMUSG Gja10     | 0.010747 | 0        | 0        | 0        | 0        | 0         |
| ENSMUSG 1700014D  | 0.081325 | 0.017469 | 0        | 0        | 0        | 0.046104  |
| ENSMUSG Pkp2      | 16.80123 | 15.75025 | 12.63805 | 13.89467 | 15.15506 | 14.885    |
| ENSMUSG Tnfrsf18  | 1.83727  | 1.478171 | 3.139399 | 3.804034 | 4.143066 | 3.473453  |
| ENSMUSG S100a10   | 104.8939 | 104.6109 | 120.1153 | 102.3996 | 105.4888 | 106.98259 |
| ENSMUSG Rhox2b    | 0        | 0        | 0        | 0        | 0        | 0         |
| Mus_musc Mus_musc | 0.202585 | 0        | 0.301951 | 0.414901 | 0.222217 | 0.313135  |
| Mus_musc Mus_musc | 0        | 0        | 0        | 0        | 0.070706 | 0         |
| Mus_musc Mus_musc | 0        | 0        | 0        | 0        | 0.23728  | 0         |
| Mus_musc Mus_musc | 0        | 0        | 0        | 0.174016 | 0.109723 | 0         |
| Mus_musc Mus_musc | 0.053021 | 0        | 0        | 0.154149 | 0.344623 | 0.241697  |
| ENSMUSG Oosp3     | 0        | 0        | 0        | 0        | 0        | 0         |
| Mus_musc Mus_musc | 0.162815 | 0.25778  | 0.345468 | 0.893553 | 0.469336 | 0.472459  |
| ENSMUSG Grp1      | 8.311111 | 7.861969 | 11.25534 | 9.184959 | 6.66009  | 7.862168  |
| Mus_musc Mus_musc | 0        | 0.051355 | 0.236136 | 0        | 0.132549 | 0.137191  |



|                   |          |          |          |          |          |           |
|-------------------|----------|----------|----------|----------|----------|-----------|
| ENSMUSG Gm8127    | 0        | 0        | 0        | 0.023641 | 0.019668 | 0.029407  |
| Mus_musc Mus_musc | 0.156512 | 0.143977 | 0.078637 | 0.597219 | 0.551094 | 0.778892  |
| Mus_musc Mus_musc | 0        | 0        | 0.038912 | 0.672866 | 0.562544 | 0.838536  |
| Mus_musc Mus_musc | 1.095513 | 1.233706 | 1.450301 | 0.634181 | 1.050065 | 0.723268  |
| ENSMUSG Agmo      | 11.51064 | 12.56021 | 9.137309 | 9.043354 | 9.09629  | 8.797588  |
| ENSMUSG Mpp1      | 22.84975 | 19.66776 | 22.0501  | 22.01632 | 23.47659 | 25.675235 |
| ENSMUSG Gm3371    | 0        | 0        | 0        | 0        | 0        | 0         |
| Mus_musc Mus_musc | 0        | 0        | 0        | 0        | 0        | 0.368372  |
| Mus_musc Mus_musc | 0        | 0.154309 | 0        | 0        | 0        | 0         |
| Mus_musc Mus_musc | 0.687255 | 0.146079 | 0        | 0.246233 | 0.33959  | 0.888695  |
| Mus_musc Mus_musc | 2.432423 | 2.32586  | 2.505241 | 1.686328 | 1.336657 | 1.105435  |
| Mus_musc Mus_musc | 0.936926 | 1.177686 | 1.195922 | 0.713581 | 0.68315  | 0.756909  |
| Mus_musc Mus_musc | 0        | 0        | 0        | 0        | 0        | 0.465883  |
| Mus_musc Mus_musc | 0.293777 | 0.169805 | 0.149157 | 0.111763 | 0.106425 | 0         |
| Mus_musc Mus_musc | 0.18467  | 0.121551 | 0        | 0.137463 | 0.190239 | 0.136648  |
| Mus_musc Mus_musc | 0        | 0.124538 | 0.044038 | 0.169232 | 0.305746 | 0.214025  |
| ENSMUSG Cldn19    | 0.075598 | 0.055873 | 0.037298 | 0.035154 | 0.056393 | 0.012904  |
| ENSMUSG Scgb1b27  | 0        | 0        | 0        | 0        | 0        | 0         |
| ENSMUSG Scgb2b26  | 0        | 0        | 0        | 0        | 0        | 0         |
| ENSMUSG Gm8068    | 0        | 0        | 0        | 0        | 0        | 0         |
| ENSMUSG Scgb2b27  | 0        | 0        | 0        | 0        | 0        | 0         |
| ENSMUSG D13Ertd60 | 0        | 0.022138 | 0        | 0.028797 | 0        | 0.123619  |
| ENSMUSG Rhox3f    | 0        | 0        | 0        | 0        | 0        | 0         |
| ENSMUSG Slc35f3   | 0.85286  | 0.631138 | 0.511784 | 0.398451 | 0.321153 | 0.503734  |
| ENSMUSG Olfr297   | 0        | 0        | 0        | 0        | 0        | 0         |
| ENSMUSG Fam47e    | 1.023388 | 1.457487 | 0.986317 | 1.354365 | 1.21704  | 0.806442  |
| ENSMUSG Ero1lb    | 5.395964 | 8.135858 | 5.643334 | 14.49735 | 15.60013 | 13.611722 |
| ENSMUSG Gm37596   | 0        | 0        | 0        | 0        | 0        | 0         |
| ENSMUSG Rnf103    | 12.95969 | 12.90651 | 13.68817 | 10.12394 | 12.78424 | 11.700178 |
| ENSMUSG Olfr887   | 0        | 0        | 0        | 0        | 0        | 0         |
| ENSMUSG Gm45021   | 0        | 0        | 0        | 0        | 0        | 0         |
| ENSMUSG Olfr656   | 0        | 0        | 0        | 0        | 0        | 0         |
| ENSMUSG Dot1l     | 7.603877 | 7.387279 | 8.719738 | 8.642888 | 7.93729  | 8.89608   |
| ENSMUSG Lyg2      | 0        | 0        | 0        | 0        | 0        | 0         |
| ENSMUSG Mrgprb8   | 0        | 0        | 0        | 0        | 0        | 0         |
| ENSMUSG Spata31d1 | 0.010593 | 0        | 0        | 0        | 0        | 0         |
| ENSMUSG Minar2    | 0.60994  | 0.185291 | 0.302147 | 0.626514 | 0.229894 | 0.270938  |
| Mus_musc Mus_musc | 0.188031 | 0        | 0        | 0        | 0        | 0         |
| Mus_musc Mus_musc | 0        | 0        | 0        | 0        | 0        | 0         |
| Mus_musc Mus_musc | 0        | 0        | 0        | 0.56365  | 0        | 0         |
| Mus_musc Mus_musc | 0        | 0.168589 | 0        | 0.169601 | 0.5102   | 0         |
| Mus_musc Mus_musc | 0.723547 | 0.489002 | 0.221308 | 2.595969 | 0.442747 | 0.311065  |
| Mus_musc Mus_musc | 0.690178 | 0.587942 | 0.982662 | 0.697748 | 0.504036 | 0.150444  |
| ENSMUSG Lgals7    | 0.777064 | 0.616214 | 0.308679 | 0.504508 | 0.402235 | 0.49613   |
| ENSMUSG Triqk     | 1.106813 | 1.256955 | 1.070543 | 1.224198 | 0.959005 | 0.882754  |
| ENSMUSG Skint4    | 0        | 0        | 0        | 0        | 0        | 0         |
| ENSMUSG Vmn1r178  | 0        | 0        | 0        | 0        | 0        | 0         |
| ENSMUSG Armc9     | 1.961924 | 2.081949 | 1.647143 | 2.381646 | 1.916157 | 1.963206  |
| ENSMUSG Tubb4a    | 4.116352 | 3.418144 | 4.645782 | 2.816906 | 2.873621 | 2.004348  |
| ENSMUSG Gm49339   | 3.569015 | 3.75608  | 7.330254 | 11.22888 | 10.15654 | 10.821915 |
| ENSMUSG Btbd17    | 0.032635 | 0        | 0.074678 | 0.348843 | 0.264979 | 0.318276  |
| ENSMUSG Nudt1     | 2.698007 | 2.380856 | 2.897049 | 4.509564 | 3.89791  | 6.329086  |
| ENSMUSG Mag       | 1.066078 | 1.067323 | 1.305832 | 1.796642 | 1.826885 | 2.416731  |
| ENSMUSG Clcn7     | 13.15865 | 12.11963 | 13.23697 | 12.56423 | 13.13814 | 13.45171  |
| ENSMUSG Golga2    | 24.13773 | 24.97271 | 23.64354 | 22.37329 | 24.33738 | 22.62454  |
| ENSMUSG Gm16442   | 0        | 0        | 0        | 0        | 0        | 0         |
| ENSMUSG Alg5      | 14.28428 | 11.85931 | 13.58079 | 13.84901 | 12.8276  | 14.985055 |
| ENSMUSG Skor2     | 0        | 0        | 0        | 0        | 0        | 0         |
| ENSMUSG Mindy4b-t | 0        | 0        | 0        | 0        | 0        | 0         |
| ENSMUSG Vmn2r87   | 0.053143 | 0.029862 | 0.043843 | 0.019579 | 0.016804 | 0         |
| ENSMUSG Pdp1      | 5.577265 | 5.790941 | 5.800066 | 6.649392 | 5.892102 | 5.770947  |
| ENSMUSG Cttnal1   | 6.117077 | 6.993865 | 6.011999 | 4.865732 | 4.036407 | 4.158367  |
| ENSMUSG Cyp24a1   | 0        | 0        | 0        | 0        | 0        | 0         |
| ENSMUSG Ift172    | 9.592311 | 10.05755 | 8.453218 | 8.857038 | 9.08741  | 8.791744  |

|                   |          |          |          |          |          |           |
|-------------------|----------|----------|----------|----------|----------|-----------|
| ENSMUSG Ef11      | 5.249055 | 5.398548 | 5.723974 | 5.025522 | 4.517949 | 5.223324  |
| ENSMUSG Sp6       | 1.978458 | 1.810057 | 2.741184 | 1.490817 | 1.278396 | 1.190152  |
| ENSMUSG Rad9b     | 0.758885 | 0.699845 | 0.406433 | 0.976757 | 0.544544 | 0.801992  |
| ENSMUSG Scn1b     | 10.91211 | 11.21612 | 11.97881 | 12.18126 | 11.49454 | 13.474532 |
| ENSMUSG Pnpla5    | 0.306114 | 0.061809 | 0.098546 | 0.016878 | 0        | 0         |
| ENSMUSG Sult4a1   | 0        | 0.102053 | 0.018928 | 0.146984 | 0.06808  | 0.167568  |
| ENSMUSG Trpv4     | 1.086904 | 0.628453 | 0.972848 | 1.458057 | 1.746365 | 2.247935  |
| ENSMUSG Fdxr      | 3.51362  | 2.534617 | 3.216898 | 3.063328 | 2.868673 | 3.613662  |
| ENSMUSG Otop3     | 0        | 0        | 0        | 0        | 0        | 0         |
| ENSMUSG Gm10184   | 3.111977 | 3.128217 | 4.246645 | 6.999949 | 3.709477 | 4.159711  |
| ENSMUSG Gm28919   | 0        | 0        | 0        | 0        | 0        | 0         |
| ENSMUSG Olfr844   | 0        | 0        | 0        | 0        | 0        | 0         |
| ENSMUSG Nck2      | 13.83177 | 13.28415 | 14.54176 | 11.55852 | 11.00944 | 12.688586 |
| ENSMUSG Tmem40    | 1.120324 | 1.001024 | 2.715736 | 0.901625 | 1.056087 | 0.582782  |
| ENSMUSG Dkk3      | 17.7622  | 19.96844 | 20.26673 | 13.67819 | 13.18446 | 14.604342 |
| ENSMUSG Parva     | 51.3317  | 52.69945 | 46.18943 | 36.87083 | 37.33757 | 36.985825 |
| ENSMUSG Ilf2      | 17.8245  | 18.74541 | 19.735   | 15.89157 | 16.03085 | 15.092524 |
| ENSMUSG Chtop     | 51.91989 | 55.20807 | 54.85251 | 49.83461 | 44.16837 | 47.185202 |
| ENSMUSG Trat1     | 0.504118 | 0.260325 | 0.393496 | 0.323226 | 0.238678 | 0.201006  |
| ENSMUSG Pak1      | 5.367256 | 6.030282 | 6.32209  | 5.65809  | 5.705106 | 6.073151  |
| ENSMUSG Snapin    | 24.19229 | 23.53797 | 21.14388 | 19.04819 | 19.21823 | 18.74122  |
| ENSMUSG Nat8l     | 0.989636 | 0.807542 | 1.00187  | 0.473594 | 0.434348 | 0.567341  |
| ENSMUSG Nwd1      | 0.145409 | 0.225303 | 0.097596 | 0.780209 | 0.78256  | 0.600085  |
| ENSMUSG Sprr2e    | 0        | 0        | 0        | 0        | 0        | 0         |
| ENSMUSG Olfr420   | 0        | 0        | 0        | 0        | 0        | 0         |
| ENSMUSG Gemin5    | 3.880528 | 3.203898 | 3.086133 | 3.394346 | 3.682503 | 3.830261  |
| ENSMUSG 4932438A  | 9.765559 | 8.586278 | 7.787763 | 7.986024 | 8.080051 | 8.305829  |
| ENSMUSG Gm20532   | 0        | 0        | 0        | 0        | 0        | 0         |
| ENSMUSG Ovol2     | 2.764175 | 2.349131 | 2.183683 | 2.462798 | 2.533266 | 2.27598   |
| ENSMUSG Tmem97    | 14.57374 | 12.37314 | 12.98106 | 12.64104 | 13.18442 | 14.57074  |
| ENSMUSG Calr3     | 1.121267 | 1.287755 | 0.865975 | 1.096722 | 1.024929 | 1.324479  |
| ENSMUSG Slc35e1   | 14.03638 | 15.21569 | 14.50716 | 15.2611  | 15.53834 | 17.09008  |
| ENSMUSG Syne4     | 1.430992 | 2.160091 | 1.339593 | 1.536608 | 2.477704 | 2.192292  |
| ENSMUSG Tmc4      | 24.11657 | 23.38654 | 20.45043 | 28.88025 | 26.09628 | 28.586021 |
| ENSMUSG Polr2i    | 17.21928 | 14.69851 | 18.36042 | 19.07153 | 13.80967 | 15.924153 |
| ENSMUSG Pcdhgb2   | 1.451302 | 1.373837 | 1.065493 | 0.996346 | 0.80742  | 1.61646   |
| ENSMUSG Ccnk      | 9.431306 | 9.096861 | 9.288804 | 8.291224 | 7.590426 | 9.019024  |
| ENSMUSG Cyp46a1   | 0.582848 | 0.324664 | 0.357034 | 0.085858 | 0.220716 | 0.189565  |
| ENSMUSG Erg28     | 17.51458 | 18.80476 | 16.9067  | 19.69724 | 20.99534 | 20.125814 |
| ENSMUSG Tgfb3     | 9.447899 | 8.705748 | 8.296498 | 11.78063 | 11.01559 | 11.342373 |
| ENSMUSG Pcdhga11  | 0.374648 | 0.527296 | 0.226719 | 0.401722 | 0.297309 | 0.369806  |
| ENSMUSG Wdr45     | 41.614   | 41.41578 | 41.40883 | 39.38715 | 38.2705  | 34.167975 |
| ENSMUSG Cdh6      | 0.253878 | 0.270811 | 0.162007 | 0.219528 | 0.239863 | 0.247717  |
| ENSMUSG Dusp10    | 2.023964 | 2.212282 | 3.070318 | 3.052949 | 1.888856 | 2.237018  |
| ENSMUSG Gpatch2l  | 8.359303 | 8.573352 | 8.372949 | 8.414434 | 7.43379  | 7.885358  |
| ENSMUSG Esrrb     | 0        | 0.032297 | 0        | 0.03448  | 0.015326 | 0.012853  |
| ENSMUSG Mettl23   | 10.25545 | 9.347235 | 10.9398  | 10.28346 | 8.982145 | 10.391499 |
| ENSMUSG Eif4ebp3  | 0.432166 | 0.755723 | 0.611368 | 0.028891 | 0.155829 | 0.184219  |
| ENSMUSG Bst1      | 21.3813  | 23.53659 | 20.95766 | 15.86759 | 14.65159 | 15.534751 |
| ENSMUSG 5730480H  | 4.213139 | 3.885359 | 3.290915 | 3.97163  | 3.517569 | 4.00012   |
| ENSMUSG Gm5286    | 0        | 0        | 0        | 0        | 0        | 0         |
| ENSMUSG Zscan4f   | 0        | 0        | 0        | 0        | 0        | 0         |
| ENSMUSG Zscan18   | 0.590204 | 0.519455 | 0.376824 | 0.343631 | 0.341758 | 0.308236  |
| ENSMUSG Olfr1340  | 0        | 0        | 0        | 0        | 0        | 0         |
| ENSMUSG Olfr1339  | 0        | 0        | 0        | 0        | 0        | 0         |
| ENSMUSG Hoxa13    | 0        | 0        | 0        | 0        | 0        | 0         |
| ENSMUSG Bcl6      | 10.06208 | 12.64045 | 10.68696 | 9.995735 | 10.52551 | 8.915241  |
| ENSMUSG Nubp1     | 9.298693 | 8.632354 | 9.474553 | 12.07008 | 11.07684 | 11.436955 |
| ENSMUSG Prm1      | 0        | 0        | 0        | 0        | 0        | 0         |
| ENSMUSG Litaf     | 20.49365 | 18.7904  | 25.43251 | 36.27309 | 38.38639 | 45.435041 |
| ENSMUSG 1810013L2 | 25.3893  | 26.18399 | 23.99701 | 20.99132 | 22.22715 | 20.629453 |
| ENSMUSG Emp2      | 513.0759 | 459.4615 | 478.6587 | 282.6187 | 263.5213 | 269.80618 |
| ENSMUSG Ciita     | 5.466393 | 5.253377 | 27.47117 | 21.35424 | 9.977088 | 11.917181 |
| Mus_musc Mus_musc | 0.070438 | 0.101583 | 0        | 0.213292 | 0.197519 | 0.224603  |

|                   |          |          |          |          |          |           |
|-------------------|----------|----------|----------|----------|----------|-----------|
| Mus_musc Mus_musc | 0.506474 | 0.763954 | 0.482402 | 1.088348 | 0.955854 | 0.646955  |
| Mus_musc Mus_musc | 0        | 0.308619 | 0        | 0        | 0        | 0         |
| Mus_musc Mus_musc | 0        | 0        | 0        | 0        | 0.245974 | 0         |
| ENSMUSG Myocd     | 0.206415 | 0.445276 | 0.281285 | 0.601707 | 0.893273 | 0.660146  |
| ENSMUSG Ube2d3    | 81.558   | 79.38936 | 81.86165 | 76.48851 | 74.82422 | 74.707986 |
| ENSMUSG Clybl     | 2.246754 | 2.509939 | 1.939404 | 2.866814 | 2.418356 | 3.766916  |
| ENSMUSG Armc5     | 8.00949  | 6.322826 | 7.696771 | 7.14054  | 6.881796 | 7.061945  |
| ENSMUSG Pnliprp1  | 0.673615 | 0.877342 | 0.299108 | 0.469704 | 0.616004 | 0.71621   |
| ENSMUSG 4930480E1 | 0        | 0        | 0        | 0        | 0        | 0         |
| ENSMUSG Selenoo   | 8.329171 | 6.87337  | 7.462802 | 5.854127 | 5.928784 | 6.463856  |
| ENSMUSG Alpk1     | 4.672101 | 4.849352 | 4.880392 | 5.312734 | 4.162523 | 4.677447  |
| ENSMUSG Aimp1     | 27.6826  | 25.72642 | 28.08518 | 29.05823 | 25.04883 | 26.273203 |
| ENSMUSG Enpep     | 42.27401 | 48.65308 | 44.44658 | 51.19063 | 52.90687 | 56.466682 |
| ENSMUSG Pitx2     | 0        | 0.11135  | 0        | 0.064825 | 0.024662 | 0         |
| ENSMUSG Glrb      | 0.016513 | 0.057261 | 0        | 0        | 0        | 0.017999  |
| ENSMUSG Fam20a    | 1.878406 | 2.227447 | 1.598584 | 1.192605 | 1.349012 | 1.354397  |
| ENSMUSG 1700012B0 | 0        | 0        | 0        | 0        | 0        | 0         |
| ENSMUSG AC161166  | 0.035765 | 0.029619 | 0        | 0        | 0        | 0.134671  |
| ENSMUSG Gna13     | 31.27346 | 33.38323 | 34.03951 | 30.09312 | 30.04199 | 31.774952 |
| ENSMUSG Amz2      | 13.4122  | 13.53828 | 12.07839 | 12.02319 | 11.51109 | 12.076565 |
| ENSMUSG Prkar1a   | 122.6691 | 124.3683 | 119.0107 | 97.78879 | 98.03151 | 97.964549 |
| ENSMUSG Slc13a3   | 0.09615  | 0.126154 | 0.132646 | 0.320231 | 0.404853 | 0.207131  |
| ENSMUSG Dapk2     | 32.09644 | 34.23824 | 28.55993 | 21.93306 | 20.07849 | 19.740065 |
| ENSMUSG Ciao2a    | 18.74016 | 19.14306 | 20.59829 | 26.74635 | 28.58184 | 30.161268 |
| ENSMUSG Snx1      | 41.66429 | 42.38001 | 45.3308  | 42.99164 | 44.30379 | 46.520897 |
| ENSMUSG Ppib      | 141.8229 | 151.2174 | 145.4578 | 181.8892 | 188.613  | 194.52535 |
| ENSMUSG Csnk1g1   | 4.439819 | 6.686237 | 4.554979 | 4.479201 | 4.263157 | 4.656398  |
| ENSMUSG Trip4     | 6.206938 | 5.936395 | 6.031329 | 5.928678 | 5.846948 | 5.94635   |
| ENSMUSG Rbpms2    | 1.054191 | 2.097001 | 2.196454 | 1.914912 | 2.022113 | 1.859815  |
| ENSMUSG Spg21     | 20.27776 | 20.17419 | 20.91959 | 24.11026 | 23.93655 | 27.190125 |
| ENSMUSG Cyp2d11   | 0        | 0        | 0        | 0        | 0        | 0         |
| ENSMUSG Cyp2d9    | 0        | 0        | 0        | 0        | 0        | 0.029263  |
| ENSMUSG Camsap3   | 3.883676 | 3.910603 | 3.800542 | 4.157808 | 4.391089 | 5.43726   |
| ENSMUSG 4931406B0 | 0        | 0        | 0        | 0        | 0        | 0         |
| ENSMUSG Grxcr1    | 0        | 0.031986 | 0        | 0        | 0        | 0         |
| ENSMUSG Kik12     | 0.035245 | 0        | 0        | 0.071791 | 0        | 0         |
| ENSMUSG Btnl1     | 0        | 0        | 0        | 0.042724 | 0.022116 | 0         |
| ENSMUSG Ascl1     | 0.446546 | 0.555165 | 0.13203  | 0.171772 | 0.151551 | 0.175203  |
| ENSMUSG Ccdc125   | 3.352578 | 2.6327   | 3.266801 | 4.18087  | 3.858943 | 3.497194  |
| ENSMUSG Zfp689    | 2.073852 | 1.854735 | 1.965697 | 1.616462 | 1.422028 | 1.505485  |
| ENSMUSG Fkrp      | 15.82437 | 14.02091 | 16.29497 | 12.98661 | 14.52667 | 14.982959 |
| ENSMUSG Cdca2     | 0.284519 | 0.408652 | 0.317157 | 0.997706 | 1.327485 | 1.485695  |
| ENSMUSG Gm4763    | 0        | 0        | 0        | 0        | 0        | 0         |
| ENSMUSG Olfr43    | 0        | 0        | 0        | 0        | 0        | 0         |
| ENSMUSG Fcer1g    | 21.49322 | 22.369   | 37.71005 | 48.69217 | 45.54982 | 46.333257 |
| ENSMUSG Egfem1    | 0.346251 | 0.581082 | 0.60012  | 0.472333 | 0.571595 | 0.36993   |
| ENSMUSG Gm3417    | 0.84971  | 0.408738 | 0.733559 | 0.939682 | 0.914183 | 0.656589  |
| ENSMUSG Zfp692    | 2.857958 | 2.736274 | 4.321587 | 3.467666 | 3.056952 | 3.234056  |
| ENSMUSG Cecr2     | 3.052646 | 3.666282 | 2.944671 | 2.536832 | 3.106918 | 2.638946  |
| ENSMUSG Commd4    | 15.72364 | 17.79773 | 21.18483 | 19.30195 | 17.40313 | 20.534176 |
| ENSMUSG Olfr402   | 0        | 0        | 0        | 0        | 0        | 0         |
| ENSMUSG Atp1a1    | 163.6483 | 154.7039 | 153.6011 | 136.8143 | 139.6759 | 146.15591 |
| ENSMUSG Dis3      | 3.432319 | 3.345114 | 2.826057 | 2.651398 | 2.696527 | 2.520029  |
| ENSMUSG Cdx1      | 0        | 0        | 0        | 0        | 0        | 0         |
| ENSMUSG Cd74      | 833.7026 | 789.6932 | 1748.144 | 1986.001 | 1564.865 | 1859.2669 |
| ENSMUSG Tcof1     | 6.445139 | 6.310969 | 6.833101 | 7.152137 | 7.147087 | 7.812304  |
| ENSMUSG Chd9      | 6.080669 | 6.211061 | 5.974627 | 6.217149 | 6.543822 | 6.17171   |
| ENSMUSG Tmx3      | 21.16461 | 21.64195 | 21.22107 | 20.37893 | 18.66705 | 18.58473  |
| ENSMUSG Camk2a    | 0.84308  | 0.668115 | 0.924789 | 1.248684 | 0.955583 | 1.294573  |
| ENSMUSG Spata17   | 1.297277 | 1.350576 | 0.818121 | 1.616213 | 1.754263 | 1.92675   |
| ENSMUSG Esrrg     | 0.338268 | 0.41534  | 0.166105 | 0.326948 | 0.2845   | 0.228476  |
| ENSMUSG Bpnt1     | 16.06342 | 18.39933 | 17.33204 | 13.18488 | 14.27318 | 12.931113 |
| ENSMUSG Cr2       | 0.989394 | 0.741836 | 0.757428 | 1.492502 | 1.093491 | 1.18935   |
| ENSMUSG Eprs      | 17.51339 | 17.29924 | 16.73897 | 17.54183 | 17.96564 | 18.410986 |

|                   |          |          |          |          |          |           |
|-------------------|----------|----------|----------|----------|----------|-----------|
| ENSMUSG Slc30a10  | 0        | 0        | 0        | 0.008945 | 0        | 0         |
| ENSMUSG Iars2     | 13.3088  | 11.01457 | 11.40211 | 10.97978 | 11.02138 | 10.737379 |
| ENSMUSG Eno1b     | 16.30881 | 14.94797 | 15.26593 | 21.41454 | 28.00693 | 25.805157 |
| ENSMUSG Kik1b9    | 0        | 0        | 0        | 0.046404 | 0        | 0         |
| ENSMUSG Olfr15    | 0        | 0        | 0.005171 | 0        | 0        | 0         |
| ENSMUSG Cdadc1    | 17.45292 | 18.163   | 17.66713 | 15.55682 | 15.72945 | 15.822909 |
| ENSMUSG Atp8a2    | 0.221801 | 0.12533  | 0.078031 | 0.252674 | 0.229292 | 0.225852  |
| ENSMUSG Cab39l    | 15.99088 | 20.19925 | 16.52206 | 17.16347 | 16.65713 | 16.397106 |
| ENSMUSG Gm4846    | 0        | 0        | 0        | 0        | 0        | 0         |
| ENSMUSG Borcs5    | 2.184959 | 2.93345  | 2.906679 | 3.579465 | 3.247431 | 3.350018  |
| ENSMUSG Ifnk      | 0        | 0        | 0        | 0        | 0        | 0         |
| ENSMUSG Nhlrc3    | 8.084958 | 6.928299 | 7.242141 | 8.967329 | 8.121839 | 9.043503  |
| ENSMUSG Mmd       | 30.06751 | 30.41758 | 28.09132 | 21.52464 | 25.15983 | 23.410824 |
| ENSMUSG Hlf       | 8.952164 | 8.581032 | 7.40128  | 3.92453  | 3.795937 | 2.997603  |
| ENSMUSG Sft2d2    | 37.2807  | 38.52978 | 35.35783 | 37.42296 | 38.46223 | 35.759686 |
| ENSMUSG Szrd1     | 38.92175 | 41.21377 | 40.355   | 38.47329 | 37.2599  | 36.853335 |
| ENSMUSG Tiprl     | 9.112941 | 8.738741 | 8.58256  | 7.74669  | 7.709579 | 7.723636  |
| ENSMUSG Wwox      | 4.007572 | 3.486119 | 2.449013 | 3.581611 | 3.255542 | 3.083913  |
| ENSMUSG Gm5128    | 0        | 0        | 0        | 0        | 0.00292  | 0.009027  |
| ENSMUSG Sgce      | 41.90832 | 38.79431 | 42.74809 | 24.85974 | 25.51233 | 23.911291 |
| ENSMUSG Pcp2      | 0        | 0.064333 | 0        | 0        | 0        | 0         |
| ENSMUSG Vmn1r122  | 0        | 0        | 0        | 0        | 0        | 0         |
| ENSMUSG BC061237  | 0        | 0        | 0        | 0        | 0        | 0         |
| ENSMUSG Olfr129   | 0        | 0        | 0        | 0        | 0        | 0         |
| Mus_musc Mus_musc | 0.211743 | 0.183774 | 0.099765 | 0.198337 | 0.519284 | 0.36801   |
| Mus_musc Mus_musc | 0.280542 | 0.12243  | 0.187447 | 0.392831 | 0.683195 | 0.289153  |
| Mus_musc Mus_musc | 0.082145 | 0        | 0.293094 | 0.144664 | 0        | 0         |
| Mus_musc Mus_musc | 0        | 0        | 0        | 0        | 0        | 0         |
| Mus_musc Mus_musc | 0        | 0.139912 | 0.148517 | 0.275219 | 0.249099 | 0.419234  |
| Mus_musc Mus_musc | 0        | 0        | 0        | 0.143879 | 0        | 0.140969  |
| Mus_musc Mus_musc | 0.381905 | 0.41756  | 0.376104 | 0.125547 | 0        | 0.789115  |
| Mus_musc Mus_musc | 0.300073 | 0        | 0        | 0.527602 | 0.148957 | 0.146957  |
| Mus_musc Mus_musc | 0.069493 | 0        | 0        | 0.115725 | 0.072654 | 0         |
| ENSMUSG Upf2      | 9.729485 | 10.56414 | 9.735875 | 10.5379  | 11.09676 | 9.745387  |
| ENSMUSG Pknox1    | 7.018158 | 7.213689 | 6.218367 | 6.306982 | 7.148366 | 6.30918   |
| ENSMUSG Vmn1r128  | 0        | 0        | 0        | 0        | 0        | 0         |
| ENSMUSG Gm21828   | 0        | 0        | 0        | 0        | 0        | 0         |
| ENSMUSG Spin2f    | 0        | 0        | 0        | 0        | 0        | 0         |
| ENSMUSG Pld3      | 44.37487 | 36.3824  | 42.03684 | 73.42689 | 75.42941 | 85.602584 |
| ENSMUSG Ddx23     | 30.92917 | 30.56291 | 33.04617 | 26.69285 | 26.43012 | 26.359111 |
| Mus_musc Mus_musc | 0.142382 | 0.118333 | 0        | 0.412576 | 0.335255 | 0.239246  |
| Mus_musc Mus_musc | 0        | 0        | 0        | 0        | 0        | 0         |
| Mus_musc Mus_musc | 0        | 0.154309 | 0        | 0        | 0        | 0         |
| Mus_musc Mus_musc | 0        | 0.074637 | 0.045071 | 0.246161 | 0        | 0.059039  |
| Mus_musc Mus_musc | 0        | 0.186493 | 0.076131 | 0        | 0        | 0.085062  |
| ENSMUSG Olfr770   | 0        | 0        | 0        | 0        | 0        | 0         |
| Mus_musc Mus_musc | 0        | 0        | 0        | 0        | 0.218385 | 0         |
| ENSMUSG Gimap6    | 62.03561 | 55.64886 | 55.75109 | 50.60753 | 45.71423 | 44.132728 |
| Mus_musc Mus_musc | 0.604969 | 0.878608 | 0.558725 | 1.438826 | 1.846252 | 2.210822  |
| ENSMUSG Foxi1     | 0        | 0        | 0        | 0        | 0        | 0         |
| Mus_musc Mus_musc | 0.342825 | 0.445408 | 0.280879 | 0.42706  | 0.340648 | 0.617787  |
| Mus_musc Mus_musc | 0        | 0.273861 | 0.056899 | 0        | 0        | 0.056719  |
| Mus_musc Mus_musc | 0        | 0        | 0.043793 | 0        | 0        | 0.174599  |
| Mus_musc Mus_musc | 0        | 0        | 0        | 0.120833 | 0.53727  | 0         |
| Mus_musc Mus_musc | 0        | 0        | 0        | 0        | 0.107371 | 0         |
| Mus_musc Mus_musc | 0        | 0        | 0.176664 | 0        | 0        | 0         |
| Mus_musc Mus_musc | 0.312214 | 0.611348 | 0.772516 | 1.560319 | 0.397961 | 0.769666  |
| Mus_musc Mus_musc | 0.180006 | 0.354535 | 0.133236 | 2.703424 | 1.305489 | 1.871874  |
| ENSMUSG Slc25a37  | 9.290604 | 10.22516 | 10.40832 | 7.846767 | 7.994637 | 7.891791  |
| ENSMUSG Golgb1    | 14.64542 | 14.94135 | 12.62643 | 13.71892 | 14.42188 | 14.822472 |
| ENSMUSG Plekhh1   | 14.11097 | 13.5416  | 14.15132 | 13.66441 | 14.43084 | 15.012639 |
| ENSMUSG Hdac11    | 7.268479 | 7.656583 | 6.254363 | 5.275149 | 4.507819 | 4.743669  |
| ENSMUSG Ttc39d    | 0        | 0        | 0.015314 | 0        | 0.054198 | 0.125911  |
| ENSMUSG Hoxd9     | 0.051585 | 0.083584 | 0.055363 | 0.097762 | 0        | 0.154523  |

|                   |          |          |          |          |          |           |
|-------------------|----------|----------|----------|----------|----------|-----------|
| Mus_musc Mus_musc | 0.26827  | 0        | 0.272855 | 0.514483 | 0        | 0.080971  |
| ENSMUSG Iqub      | 1.319671 | 1.391742 | 0.794662 | 1.837775 | 1.504277 | 1.305674  |
| ENSMUSG Pcdhb20   | 1.275116 | 0.9644   | 1.313705 | 1.080524 | 1.147117 | 0.876838  |
| Mus_musc Mus_musc | 0.464432 | 0.314489 | 0.825657 | 0.759296 | 0.224255 | 0.265125  |
| Mus_musc Mus_musc | 0.988938 | 0.770061 | 0.960806 | 0.597761 | 0.584143 | 0.805146  |
| Mus_musc Mus_musc | 0.474426 | 0.514803 | 0.352832 | 0.539399 | 0.482743 | 0.420928  |
| Mus_musc Mus_musc | 3.229269 | 1.157007 | 2.301499 | 2.286163 | 2.181353 | 2.739677  |
| Mus_musc Mus_musc | 0.068375 | 0        | 0.162401 | 0.110738 | 0.145165 | 0.064127  |
| Mus_musc Mus_musc | 0        | 0.399686 | 0.228479 | 0.487816 | 0        | 0         |
| ENSMUSG Rpgrip1l  | 1.848069 | 2.112544 | 1.593266 | 2.228261 | 1.942309 | 2.34557   |
| Mus_musc Mus_musc | 0        | 0.096164 | 0        | 0        | 0        | 0.078301  |
| ENSMUSG Hdac5     | 35.03714 | 36.4504  | 34.94958 | 28.17338 | 29.39137 | 30.804091 |
| Mus_musc Mus_musc | 0.354642 | 0.349637 | 0.18861  | 8.789428 | 3.171887 | 23.660595 |
| Mus_musc Mus_musc | 0        | 0        | 0        | 0        | 0        | 0         |
| ENSMUSG Zfp936    | 0        | 0        | 0        | 0        | 0        | 0         |
| Mus_musc Mus_musc | 0.294566 | 0        | 0        | 0.450374 | 4.640845 | 0         |
| Mus_musc Mus_musc | 1.381522 | 0.979446 | 0.688228 | 104.4905 | 85.28921 | 76.061996 |
| Mus_musc Mus_musc | 0        | 0        | 0        | 0.383003 | 2.841476 | 0.324601  |
| ENSMUSG Rala      | 25.9698  | 29.34712 | 27.41243 | 23.27427 | 22.84364 | 20.832575 |
| ENSMUSG Cdk14     | 17.68545 | 19.93209 | 15.06612 | 12.96149 | 14.57863 | 13.564982 |
| Mus_musc Mus_musc | 2.17146  | 1.649156 | 0.74617  | 211.5994 | 137.2617 | 126.62434 |
| Mus_musc Mus_musc | 0.067637 | 0.111014 | 0        | 4.140949 | 2.956355 | 2.224989  |
| ENSMUSG Cyth1     | 19.65249 | 19.33014 | 20.0138  | 19.48236 | 19.16278 | 18.231194 |
| ENSMUSG Rab9      | 22.13974 | 17.93124 | 20.53988 | 21.02242 | 20.40853 | 19.89671  |
| ENSMUSG Gprc5a    | 272.6619 | 218.3376 | 232.6875 | 129.8334 | 135.7037 | 135.95992 |
| ENSMUSG Kctd11    | 9.692346 | 9.814137 | 9.558103 | 8.137384 | 7.640202 | 8.586557  |
| ENSMUSG Lpcat3    | 21.54308 | 24.34848 | 24.99117 | 24.37658 | 27.84083 | 28.708995 |
| Mus_musc Mus_musc | 1.369266 | 0.931451 | 1.12138  | 0.610851 | 0.608858 | 0.771835  |
| Mus_musc Mus_musc | 0        | 0.154309 | 0        | 0        | 0        | 0         |
| Mus_musc Mus_musc | 0        | 0.258705 | 0        | 0.083242 | 0.387433 | 0         |
| Mus_musc Mus_musc | 0        | 0        | 0        | 0        | 0        | 0.088541  |
| ENSMUSG Hnrnp2    | 39.80113 | 43.6645  | 43.33759 | 36.84799 | 37.91822 | 36.403418 |
| ENSMUSG Pih1h3b   | 0.217688 | 0.685239 | 0.44669  | 1.215807 | 1.500962 | 1.103531  |
| ENSMUSG Zfp874b   | 2.809719 | 3.406523 | 2.938077 | 2.376199 | 2.912816 | 2.778858  |
| ENSMUSG Olfr1390  | 0        | 0        | 0        | 0        | 0        | 0         |
| ENSMUSG Mfap4     | 295.3995 | 277.4749 | 324.3402 | 345.7192 | 356.8473 | 319.74471 |
| ENSMUSG Zfp532    | 6.953982 | 6.13814  | 6.149834 | 4.937101 | 5.054692 | 4.733259  |
| ENSMUSG Sc11      | 2.33687  | 2.757157 | 1.845491 | 2.141007 | 2.265712 | 2.184465  |
| ENSMUSG Kprp      | 0        | 0        | 0        | 0        | 0        | 0         |
| ENSMUSG Hnf4g     | 0        | 0        | 0        | 0.034848 | 0        | 0.018634  |
| Mus_musc Mus_musc | 0.425197 | 0        | 0        | 0.093858 | 0        | 0         |
| ENSMUSG Rhot1     | 21.67536 | 19.70968 | 19.0717  | 16.00513 | 17.12396 | 16.641091 |
| ENSMUSG Btn1a1    | 0        | 0        | 0        | 0        | 0        | 0         |
| ENSMUSG Tcl1b5    | 0        | 0        | 0        | 0        | 0        | 0         |
| ENSMUSG Kat2b     | 18.07167 | 18.73507 | 19.1085  | 17.27522 | 15.42924 | 14.533137 |
| ENSMUSG Scml4     | 0.918344 | 0.60277  | 0.773147 | 0.807754 | 0.743368 | 0.664693  |
| ENSMUSG Sntn      | 4.547404 | 5.926471 | 3.468504 | 8.196651 | 8.13813  | 5.579506  |
| ENSMUSG Gm8906    | 0        | 0        | 0        | 0        | 0.095866 | 0.047764  |
| ENSMUSG Tmem81    | 2.862753 | 2.763075 | 3.882339 | 2.204507 | 2.375339 | 2.029359  |
| ENSMUSG Rpl27     | 242.7218 | 238.009  | 267.2435 | 290.2034 | 260.0497 | 294.21047 |
| ENSMUSG Ebp       | 19.29723 | 20.39901 | 18.65814 | 21.21614 | 20.90954 | 20.168024 |
| ENSMUSG Arhgap8   | 11.93688 | 11.31819 | 10.01875 | 9.478016 | 7.729511 | 10.076589 |
| ENSMUSG Gm11020   | 0        | 0        | 0        | 0.256396 | 0        | 0         |
| ENSMUSG Synpo2l   | 0.220383 | 0.690657 | 0.268759 | 0.394238 | 0.169442 | 0.154634  |
| ENSMUSG Ttc5      | 15.30413 | 13.40548 | 15.67868 | 15.99197 | 12.95618 | 15.241446 |
| ENSMUSG Osgep     | 9.294034 | 8.490959 | 9.160348 | 9.718673 | 8.915189 | 9.100393  |
| ENSMUSG Atp6ap1l  | 0        | 0        | 0        | 0        | 0        | 0         |
| ENSMUSG Palld     | 16.66481 | 14.80016 | 18.76898 | 13.86652 | 15.19168 | 14.450475 |
| ENSMUSG Mettl7a3  | 0.798223 | 1.038933 | 0.861997 | 0.459929 | 0.643882 | 0.700459  |
| ENSMUSG Defb35    | 0        | 0        | 0        | 0        | 0        | 0         |
| ENSMUSG Ccdc54    | 0        | 0        | 0        | 0        | 0        | 0         |
| ENSMUSG Usp13     | 1.096833 | 1.169941 | 0.891963 | 0.497438 | 0.662881 | 0.665841  |
| ENSMUSG Cyp2ab1   | 0.19305  | 0.221709 | 0.452763 | 0.396324 | 0.287992 | 0.470254  |
| Mus_musc Mus_musc | 0.270728 | 0        | 0.173917 | 0        | 0        | 0         |

|                   |          |          |          |          |          |           |
|-------------------|----------|----------|----------|----------|----------|-----------|
| Mus_musc Mus_musc | 0.270597 | 0.214654 | 0.344479 | 0.120159 | 0        | 0         |
| Mus_musc Mus_musc | 0        | 0.231011 | 0.368949 | 0.082411 | 0.300315 | 0.282948  |
| Mus_musc Mus_musc | 0.371455 | 0.171035 | 0.095534 | 0.073805 | 0        | 0         |
| ENSMUSG Tcf20     | 10.06203 | 9.629498 | 8.394428 | 9.328689 | 9.417476 | 9.301264  |
| ENSMUSG 1110002E2 | 0.010655 | 0.076909 | 0.042997 | 0.040427 | 0.032122 | 0.063097  |
| ENSMUSG Nwd2      | 0.130348 | 0.157112 | 0.042006 | 0.190207 | 0.178729 | 0.199165  |
| ENSMUSG Oosp1     | 0        | 0        | 0        | 1.350017 | 2.222746 | 0.92599   |
| ENSMUSG Fam171a1  | 21.28044 | 21.30671 | 20.21204 | 14.7747  | 17.20959 | 15.729649 |
| ENSMUSG Htr5b     | 0.020309 | 0        | 0        | 0        | 0.027304 | 0.028556  |
| ENSMUSG Stra6     | 0.266772 | 0.170319 | 0.016361 | 0.115087 | 0.107089 | 0.141507  |
| ENSMUSG Plpp6     | 9.554359 | 9.040406 | 10.14675 | 8.777118 | 8.326417 | 8.041188  |
| ENSMUSG Khl42     | 2.89569  | 2.785274 | 2.760018 | 2.775262 | 2.720742 | 2.897723  |
| ENSMUSG Ano10     | 18.33432 | 17.88494 | 17.26512 | 15.86137 | 14.71677 | 15.826123 |
| ENSMUSG Pcdhb11   | 1.446851 | 1.508383 | 1.04615  | 0.868978 | 1.101565 | 0.951817  |
| ENSMUSG Krtap31-2 | 0        | 0        | 0        | 0        | 0        | 0         |
| ENSMUSG Cbr1      | 23.45482 | 26.66176 | 22.80715 | 27.89731 | 27.05032 | 29.565469 |
| ENSMUSG 1700029P: | 0        | 0        | 0        | 0.003409 | 0        | 0         |
| ENSMUSG Ankrd44   | 36.14159 | 35.54893 | 31.2805  | 23.97023 | 25.29222 | 25.84442  |
| ENSMUSG Olfr1457  | 0        | 0        | 0        | 0        | 0        | 0         |
| ENSMUSG Scamp4    | 17.59841 | 15.98711 | 16.99371 | 13.29461 | 16.04414 | 15.253701 |
| Mus_musc Mus_musc | 0.049014 | 0        | 0        | 0        | 0.024005 | 0.041237  |
| Mus_musc Mus_musc | 0.760077 | 1.272552 | 1.093457 | 1.30882  | 0.994465 | 0.840545  |
| Mus_musc Mus_musc | 2.215303 | 2.24258  | 2.60647  | 2.422231 | 2.265324 | 2.089757  |
| Mus_musc Mus_musc | 0.244558 | 0.346618 | 0.103454 | 0.350294 | 0.505496 | 0.583331  |
| Mus_musc Mus_musc | 0.047872 | 0        | 0        | 0        | 0.223443 | 0.216092  |
| Mus_musc Mus_musc | 0.478692 | 0.708035 | 0.471149 | 0.561203 | 0.568343 | 0.213583  |
| Mus_musc Mus_musc | 0        | 0.576529 | 0.260261 | 0        | 0        | 0.152922  |
| Mus_musc Mus_musc | 0        | 0        | 0        | 0        | 0        | 0         |
| Mus_musc Mus_musc | 1.033801 | 0.362813 | 0.326102 | 0.578318 | 0.63755  | 1.097039  |
| ENSMUSG Akp3      | 0        | 0        | 0        | 0        | 0        | 0         |
| ENSMUSG Gm16223   | 0        | 0        | 0        | 0        | 0        | 0         |
| ENSMUSG Hmg20a    | 13.47281 | 13.81935 | 13.42268 | 11.99691 | 11.39353 | 11.457817 |
| ENSMUSG Rps28     | 104.1484 | 107.2563 | 116.0521 | 135.0522 | 105.6712 | 116.98215 |
| ENSMUSG Prr9      | 0        | 0        | 0        | 0        | 0        | 0.012923  |
| ENSMUSG Lman1l    | 0        | 0        | 0        | 0        | 0        | 0         |
| Mus_musc Mus_musc | 0        | 0.231145 | 0.080623 | 0.375155 | 0.442268 | 0         |
| Mus_musc Mus_musc | 1.513435 | 1.53961  | 1.012801 | 1.142972 | 1.383384 | 1.282364  |
| Mus_musc Mus_musc | 0        | 0.143636 | 0.209932 | 0.422698 | 0.368789 | 0.189584  |
| Mus_musc Mus_musc | 0.188031 | 0        | 0        | 0        | 0        | 0         |
| Mus_musc Mus_musc | 0        | 0        | 0        | 0        | 0        | 0         |
| Mus_musc Mus_musc | 0        | 0        | 0.164223 | 0.075432 | 0        | 0         |
| Mus_musc Mus_musc | 0        | 0        | 0        | 0        | 0        | 0         |
| ENSMUSG Gphn      | 7.926598 | 7.989339 | 7.586268 | 7.673473 | 7.063077 | 8.157186  |
| ENSMUSG 4933416Cf | 0        | 0        | 0        | 0        | 0        | 0         |
| ENSMUSG Dynlrb1   | 87.05028 | 85.52945 | 92.0097  | 77.73083 | 72.96201 | 76.854487 |
| ENSMUSG Atp10d    | 12.81994 | 13.49596 | 11.46949 | 14.31966 | 13.8406  | 14.074492 |
| ENSMUSG Mtmr1     | 6.799184 | 6.464746 | 6.006354 | 6.948219 | 6.355308 | 7.494346  |
| ENSMUSG Hmgb3     | 9.062117 | 8.971545 | 6.863742 | 10.55534 | 10.93674 | 11.28499  |
| ENSMUSG B230104I2 | 0        | 0.08242  | 0        | 0        | 0        | 0.059578  |
| ENSMUSG Gm8764    | 0        | 0        | 0        | 0        | 0        | 0         |
| ENSMUSG Prr23a1   | 0        | 0        | 0        | 0        | 0        | 0         |
| ENSMUSG Zfp457    | 0.292169 | 0.50762  | 0.284234 | 0.518718 | 0.481409 | 0.432446  |
| ENSMUSG Exoc3l4   | 3.509383 | 3.417499 | 4.421079 | 4.292933 | 4.272663 | 3.691767  |
| ENSMUSG Clk2      | 15.50851 | 15.99984 | 18.40487 | 13.47368 | 12.48531 | 14.275043 |
| ENSMUSG A1cf      | 0        | 0        | 0        | 0        | 0        | 0         |
| ENSMUSG Adam17    | 17.15385 | 17.33903 | 18.24618 | 20.88975 | 22.5342  | 23.054386 |
| ENSMUSG Scgb1b2   | 0        | 0        | 0        | 0        | 0        | 0         |
| ENSMUSG Tecpr1    | 16.93412 | 17.05451 | 17.22674 | 15.96781 | 14.67723 | 15.027646 |
| ENSMUSG Cyp2b10   | 257.1828 | 263.6269 | 225.3362 | 115.8637 | 141.0194 | 117.98803 |
| ENSMUSG Col23a1   | 13.62031 | 16.0877  | 12.3446  | 7.925721 | 8.824793 | 7.952416  |
| ENSMUSG Zfp641    | 4.526949 | 4.390196 | 4.861386 | 2.716256 | 3.450739 | 2.682298  |
| ENSMUSG Krt75     | 0        | 0        | 0        | 0        | 0        | 0         |
| ENSMUSG Baiap2l2  | 0.411759 | 0.377801 | 0.193955 | 0.187812 | 0.260257 | 0.224396  |
| ENSMUSG Scaf4     | 10.32307 | 10.00185 | 10.80958 | 8.984163 | 9.149205 | 9.423551  |

|                  |          |          |          |          |          |           |
|------------------|----------|----------|----------|----------|----------|-----------|
| ENSMUSG Sod1     | 390.9149 | 427.4938 | 401.9901 | 300.7664 | 285.4449 | 279.16101 |
| ENSMUSG Jazf1    | 1.979152 | 2.552513 | 1.245435 | 1.665745 | 2.031582 | 1.996703  |
| ENSMUSG Shisa6   | 0.192725 | 0.194546 | 0.132013 | 0.117458 | 0.045335 | 0.027836  |
| ENSMUSG Atp13a3  | 47.74511 | 49.65985 | 43.0342  | 45.08288 | 43.31239 | 47.33131  |
| ENSMUSG Atxn7l3  | 19.84651 | 20.33117 | 22.97397 | 19.15466 | 19.24227 | 17.552666 |
| ENSMUSG Vmn1r62  | 0        | 0        | 0        | 0        | 0        | 0         |
| ENSMUSG Tmem44   | 8.718248 | 8.029638 | 9.711228 | 6.13047  | 5.353573 | 6.319418  |
| ENSMUSG Pax4     | 0        | 0        | 0        | 0        | 0        | 0         |
| ENSMUSG Pcdhga4  | 2.610774 | 2.891799 | 1.592902 | 1.990742 | 1.981346 | 2.032081  |
| ENSMUSG Trim69   | 0.092304 | 0.173357 | 0.138954 | 0.236278 | 0.170429 | 0.411942  |
| ENSMUSG Olfr908  | 0        | 0        | 0        | 0        | 0        | 0         |
| ENSMUSG Atf7     | 18.6128  | 17.4351  | 17.04364 | 14.08886 | 13.81034 | 13.640925 |
| ENSMUSG Prrg3    | 31.78886 | 34.62493 | 29.17561 | 33.19191 | 35.85255 | 35.66082  |
| ENSMUSG Vmn1r40  | 0        | 0        | 0        | 0        | 0        | 0         |
| ENSMUSG lpo13    | 23.73382 | 22.91187 | 22.86382 | 17.59127 | 18.96587 | 19.929815 |
| ENSMUSG Usp37    | 3.562288 | 4.019831 | 3.017989 | 3.363021 | 3.088323 | 3.376276  |
| ENSMUSG Syne1    | 8.537371 | 8.336826 | 7.076304 | 8.093554 | 7.821432 | 8.533756  |
| ENSMUSG Ppif     | 5.413764 | 5.288404 | 5.64102  | 7.272111 | 8.144675 | 9.403983  |
| ENSMUSG Timeless | 5.274009 | 5.363684 | 8.125806 | 5.847561 | 4.835526 | 4.190253  |
| ENSMUSG Ifi203   | 17.52528 | 13.73525 | 22.0633  | 16.32515 | 12.3695  | 15.505631 |
| ENSMUSG Edrf1    | 5.219512 | 5.68601  | 5.713992 | 4.672048 | 6.019514 | 5.778659  |
| ENSMUSG Tmem254l | 4.408521 | 4.24349  | 2.728959 | 4.124349 | 4.001142 | 4.876296  |
| ENSMUSG Anxa11   | 44.84423 | 31.46978 | 31.99491 | 23.4164  | 23.90242 | 24.503846 |
| ENSMUSG Ifi206   | 0.224626 | 0.083358 | 0.170322 | 0.099829 | 0.097911 | 0.137157  |
| ENSMUSG Fdxacb1  | 2.346828 | 2.117594 | 1.938219 | 1.748484 | 1.881895 | 2.236556  |
| ENSMUSG Rtkn2    | 81.61563 | 82.58863 | 66.76136 | 46.39306 | 52.45859 | 42.723688 |
| ENSMUSG Nmrk1    | 1.330556 | 1.674125 | 1.916804 | 1.416798 | 1.36657  | 1.477186  |
| ENSMUSG Vstm2l   | 0        | 0        | 0        | 0        | 0        | 0         |
| ENSMUSG Clba1    | 5.446676 | 5.470736 | 4.576791 | 4.664432 | 5.105702 | 5.521031  |
| ENSMUSG Tas2r140 | 0        | 0        | 0        | 0        | 0        | 0         |
| ENSMUSG BC030499 | 0        | 0        | 0        | 0        | 0.031537 | 0.054737  |
| ENSMUSG Tas2r115 | 0        | 0        | 0        | 0        | 0        | 0         |
| ENSMUSG 1-Mar    | 4.650677 | 3.537669 | 4.766503 | 7.602188 | 7.623236 | 7.734663  |
| ENSMUSG Megf11   | 0.13484  | 0.206884 | 0.233345 | 0.173505 | 0.159809 | 0.14189   |
| ENSMUSG Elf1     | 24.54527 | 23.80808 | 24.11162 | 23.79758 | 22.16728 | 23.215284 |
| ENSMUSG 4930544G | 0        | 0        | 0        | 0        | 0        | 0         |
| ENSMUSG Ly6l     | 0        | 0        | 0        | 0        | 0        | 0         |
| ENSMUSG Tubb3    | 0.08509  | 0.136054 | 0.101465 | 0.151587 | 0.166208 | 0.306225  |
| ENSMUSG Ftl1-ps1 | 24.57744 | 20.81848 | 17.79862 | 25.63478 | 26.32323 | 33.106949 |
| ENSMUSG Gm7876   | 0        | 0        | 0        | 0        | 0        | 0         |
| ENSMUSG H2-Q2    | 15.37127 | 8.093585 | 30.58932 | 25.81306 | 10.8678  | 26.675203 |
| ENSMUSG Polr2l   | 10.26891 | 9.728264 | 10.01438 | 8.933462 | 9.517689 | 8.94587   |
| ENSMUSG Socs7    | 7.675207 | 8.770222 | 7.821942 | 6.831616 | 7.080484 | 7.404972  |
| ENSMUSG 1700019A | 0        | 0        | 0        | 0        | 0        | 0         |
| ENSMUSG Plekhh1  | 4.645495 | 5.420909 | 3.852488 | 3.603414 | 3.814489 | 3.615421  |
| ENSMUSG Sv2a     | 0.245436 | 0.47571  | 0.300747 | 0.348514 | 0.301404 | 0.285374  |
| ENSMUSG Cdk19    | 15.43052 | 21.79284 | 15.42918 | 12.67923 | 13.9712  | 14.663899 |
| ENSMUSG Tfdp1    | 12.79181 | 14.02252 | 16.29375 | 15.42902 | 19.59429 | 15.895825 |
| ENSMUSG Vmn2r24  | 0        | 0        | 0        | 0        | 0        | 0         |
| ENSMUSG Chchd10  | 72.91028 | 39.27173 | 38.19669 | 41.22956 | 84.89967 | 68.053846 |
| ENSMUSG Zfp260   | 16.9049  | 16.74749 | 15.04907 | 15.05761 | 14.84456 | 13.949971 |
| ENSMUSG Tmem200c | 1.953302 | 1.977047 | 2.245542 | 1.673554 | 1.643509 | 2.257927  |
| ENSMUSG Wdr26    | 26.41474 | 26.83648 | 27.89827 | 32.2894  | 29.34714 | 30.579035 |
| ENSMUSG Mboat1   | 4.018144 | 3.937888 | 3.297599 | 3.170059 | 3.587642 | 3.560945  |
| ENSMUSG Shank1   | 0.145262 | 0.087932 | 0.088577 | 0.253281 | 0.121892 | 0.194646  |
| ENSMUSG Sumf1    | 19.69876 | 16.64311 | 18.00135 | 17.38435 | 19.24773 | 19.97787  |
| ENSMUSG Itpr1    | 16.82878 | 17.78425 | 14.08105 | 17.17811 | 16.63888 | 18.140911 |
| ENSMUSG Larp1    | 17.41294 | 18.33447 | 18.19283 | 19.13817 | 17.1187  | 18.73823  |
| ENSMUSG Edem1    | 14.97082 | 13.94701 | 15.54931 | 41.98609 | 42.4812  | 43.385769 |
| ENSMUSG Arl8b    | 22.95598 | 24.15939 | 21.85672 | 24.15109 | 26.23558 | 26.276367 |
| ENSMUSG H2-M1    | 0        | 0        | 0        | 0        | 0        | 0         |
| ENSMUSG Hand1    | 0        | 0        | 0        | 0        | 0        | 0         |
| ENSMUSG Slc6a13  | 0.023062 | 0        | 0.127496 | 0        | 0.069362 | 0.036936  |
| ENSMUSG Slc6a12  | 0        | 0        | 0        | 0.339689 | 0.376563 | 0.374302  |

|                   |          |          |          |          |          |           |
|-------------------|----------|----------|----------|----------|----------|-----------|
| ENSMUSG Fam53a    | 10.16966 | 10.65724 | 10.24209 | 8.504826 | 8.135933 | 8.612777  |
| ENSMUSG Tshb      | 3.421967 | 3.425155 | 3.269822 | 1.949247 | 1.637067 | 1.299657  |
| ENSMUSG Ube2o     | 7.660917 | 7.212662 | 7.938912 | 6.058219 | 5.576328 | 6.118225  |
| ENSMUSG Txndc17   | 38.81603 | 36.48518 | 41.90392 | 40.92049 | 37.69463 | 39.569721 |
| ENSMUSG Aanat     | 0.041693 | 0.008355 | 0.032214 | 0.07623  | 0.039894 | 0.067001  |
| ENSMUSG Slc13a5   | 0        | 0        | 0        | 0.026032 | 0        | 0.070377  |
| ENSMUSG Rhbdf2    | 15.33246 | 12.91321 | 15.59434 | 14.61201 | 15.06168 | 15.998166 |
| ENSMUSG 4933427D  | 2.770369 | 3.320515 | 2.820425 | 2.889859 | 2.75058  | 2.394179  |
| ENSMUSG Pimreg    | 0.252822 | 0.245424 | 0.527226 | 0.683616 | 1.589667 | 1.948858  |
| ENSMUSG mt-Nd4l   | 1403.99  | 1742.522 | 1164.803 | 1438.269 | 1370.384 | 1266.3959 |
| ENSMUSG Tspan2    | 51.00246 | 50.91373 | 44.4419  | 30.17396 | 31.41467 | 32.122816 |
| ENSMUSG Ngf       | 0.233495 | 0.190059 | 0.084397 | 0.040169 | 0        | 0         |
| ENSMUSG Ntpcr     | 5.012915 | 5.384456 | 4.951038 | 7.140534 | 5.781043 | 8.947769  |
| ENSMUSG Map3k21   | 0.596925 | 0.558311 | 0.483692 | 0.555611 | 0.512199 | 0.628876  |
| ENSMUSG Mau2      | 22.81819 | 21.28838 | 21.86398 | 20.22158 | 20.64312 | 20.446103 |
| ENSMUSG C1qtnf12  | 3.296055 | 3.52627  | 3.299587 | 3.451343 | 2.830199 | 3.291964  |
| ENSMUSG Ccndbp1   | 30.88703 | 29.26469 | 31.02052 | 27.12175 | 29.61557 | 24.60138  |
| ENSMUSG Iqcf3     | 0        | 0        | 0        | 0        | 0        | 0         |
| ENSMUSG Gm10577   | 0        | 0        | 0        | 0        | 0        | 0         |
| ENSMUSG Gm7579    | 0.057797 | 0.063241 | 0        | 0        | 0        | 0.067937  |
| ENSMUSG Krtap5-5  | 0.095853 | 0        | 0        | 0        | 0        | 0         |
| Mus_musc Mus_musc | 0.240894 | 0.113124 | 0.666125 | 0.206218 | 0        | 0.199917  |
| Mus_musc Mus_musc | 0.127259 | 0.16113  | 0.210004 | 0        | 0        | 0         |
| ENSMUSG Serpina7  | 0.104072 | 0.033378 | 0.181262 | 0.072893 | 0.045111 | 0.08071   |
| ENSMUSG Pabpc4    | 9.748238 | 10.3634  | 10.87512 | 12.05916 | 14.8762  | 13.364333 |
| ENSMUSG Col4a6    | 0.379796 | 0.277051 | 0.30039  | 0.2499   | 0.177481 | 0.192387  |
| ENSMUSG Cdr1      | 0        | 0.014895 | 0        | 0        | 0        | 0         |
| ENSMUSG Gm8265    | 0        | 0        | 0        | 0        | 0        | 0         |
| ENSMUSG Acsl4     | 32.91937 | 37.27156 | 29.34248 | 42.62237 | 42.96924 | 45.540713 |
| ENSMUSG Lhx6      | 1.142014 | 0.822545 | 0.942725 | 0.989642 | 0.905334 | 0.634602  |
| ENSMUSG Gca       | 5.481108 | 5.353052 | 5.071965 | 4.395184 | 4.48204  | 4.565227  |
| ENSMUSG Ndufa8    | 40.33023 | 48.38501 | 45.16386 | 41.67798 | 42.03418 | 47.606693 |
| ENSMUSG Morn5     | 1.009681 | 1.300607 | 0.551802 | 2.29889  | 1.71736  | 2.391583  |
| ENSMUSG Ifih1     | 9.315081 | 7.826075 | 9.464579 | 7.553367 | 7.077445 | 7.119242  |
| ENSMUSG Ptp4a1    | 0.121263 | 0.159254 | 0.104385 | 1.262265 | 2.396976 | 1.381491  |
| Mus_musc Mus_musc | 0.492795 | 0.077019 | 0.06674  | 0        | 0        | 0         |
| ENSMUSG Qrfp      | 0.084476 | 0.065108 | 0.241832 | 0.09435  | 0.058001 | 0.073058  |
| ENSMUSG Tcta      | 26.72814 | 27.84504 | 27.94319 | 22.58764 | 21.78012 | 22.455912 |
| ENSMUSG Col10a1   | 0        | 0.020467 | 0.052084 | 0        | 0        | 0         |
| ENSMUSG Slc9a8    | 6.338232 | 5.93085  | 5.690603 | 5.80408  | 5.899889 | 6.248133  |
| ENSMUSG Ptpro     | 0.8241   | 1.100052 | 2.473815 | 2.909071 | 1.757312 | 2.606019  |
| ENSMUSG Rbm12     | 3.330027 | 4.906752 | 3.241411 | 4.565413 | 2.941548 | 2.857786  |
| ENSMUSG Dera      | 6.230406 | 6.153629 | 5.757959 | 10.01255 | 8.90762  | 9.633015  |
| ENSMUSG Gm10267   | 0        | 0        | 0        | 0        | 0        | 0         |
| ENSMUSG Pabpc5    | 0.010275 | 0.019019 | 0.062327 | 0.049974 | 0.137757 | 0         |
| ENSMUSG Dgkh      | 8.866003 | 8.419711 | 7.549015 | 4.316467 | 4.814462 | 4.167694  |
| ENSMUSG Mthfd1    | 32.3483  | 28.83741 | 29.29992 | 28.36309 | 24.62808 | 28.671057 |
| Mus_musc Mus_musc | 0        | 0        | 0        | 0        | 0        | 0         |
| ENSMUSG Bdnf      | 8.362122 | 6.624133 | 7.216578 | 3.65158  | 3.883492 | 2.80971   |
| ENSMUSG Zdhhc22   | 0.010645 | 0.045196 | 0.020788 | 0        | 0.032356 | 0         |
| ENSMUSG Cxcr1     | 1.387554 | 0.71626  | 0.867776 | 0.321703 | 0.362411 | 0.334892  |
| ENSMUSG Nostrin   | 33.93227 | 35.12993 | 31.36499 | 22.82578 | 20.57342 | 18.445673 |
| ENSMUSG Fitm2     | 8.871605 | 10.90835 | 9.144909 | 7.654035 | 7.917553 | 8.042397  |
| ENSMUSG Adck1     | 6.148395 | 5.235452 | 5.683829 | 5.185714 | 5.478055 | 6.335283  |
| ENSMUSG Gtf3c1    | 17.82264 | 17.24987 | 16.75984 | 16.37731 | 16.2554  | 16.877691 |
| ENSMUSG Mctp2     | 0.94215  | 1.117706 | 1.18133  | 1.31163  | 0.921444 | 0.932391  |
| ENSMUSG Ms4a6d    | 6.1817   | 7.307242 | 17.81603 | 26.0061  | 25.99723 | 25.999749 |
| ENSMUSG Chrm1     | 0.431062 | 0.373778 | 0.26304  | 0.507899 | 0.144719 | 0.173087  |
| ENSMUSG Uncx      | 0        | 0        | 0        | 0        | 0        | 0         |
| ENSMUSG Ints1     | 7.448779 | 6.797014 | 7.883171 | 7.178613 | 7.293044 | 7.322468  |
| ENSMUSG Cabp1     | 0.576928 | 0.756082 | 0.881681 | 0.950041 | 0.903896 | 0.877942  |
| ENSMUSG Acads     | 11.32291 | 12.64387 | 9.94135  | 13.2202  | 16.32704 | 14.296548 |
| ENSMUSG Cyp2w1    | 0        | 0        | 0        | 0        | 0        | 0         |
| ENSMUSG Ms4a6b    | 6.794131 | 5.057962 | 11.81748 | 9.854208 | 7.858303 | 8.452287  |



|                    |          |          |          |          |          |           |
|--------------------|----------|----------|----------|----------|----------|-----------|
| ENSMUSG Olfr201    | 0        | 0        | 0        | 0        | 0        | 0         |
| ENSMUSG Pigz       | 0.337837 | 0.460091 | 0.611183 | 0.55796  | 0.413254 | 0.636916  |
| ENSMUSG Esf1       | 7.681115 | 8.024627 | 6.873726 | 6.145548 | 6.498828 | 5.394336  |
| ENSMUSG Olfr1467   | 0        | 0        | 0        | 0        | 0        | 0         |
| ENSMUSG Odf3l1     | 0        | 0.036158 | 0        | 0        | 0.05191  | 0         |
| ENSMUSG Sh3tc2     | 9.151671 | 9.144837 | 8.638462 | 5.263434 | 5.408604 | 5.703927  |
| ENSMUSG Ms4a7      | 1.478739 | 0.793515 | 1.835629 | 16.01058 | 14.50961 | 16.277588 |
| ENSMUSG Saxo1      | 0.029715 | 0        | 0        | 0.027592 | 0        | 0         |
| ENSMUSG Hacd4      | 4.984406 | 4.19096  | 4.600574 | 6.77112  | 5.790814 | 6.765507  |
| ENSMUSG Milt3      | 5.21848  | 5.24144  | 5.312612 | 4.827874 | 5.174391 | 5.008291  |
| ENSMUSG Rps6       | 476.9984 | 468.6798 | 483.3495 | 496.4725 | 487.7479 | 529.26825 |
| ENSMUSG Plin2      | 75.46684 | 73.15391 | 78.0033  | 99.99793 | 121.4177 | 127.24781 |
| ENSMUSG Olfr729    | 0        | 0        | 0        | 0        | 0        | 0         |
| ENSMUSG Gramd2     | 52.44175 | 50.39914 | 43.44251 | 24.61275 | 27.3947  | 24.170929 |
| ENSMUSG Ppp1r3d    | 1.645318 | 2.063786 | 2.159973 | 1.760828 | 2.156991 | 1.688628  |
| ENSMUSG Abca3      | 90.65899 | 88.9796  | 78.30851 | 102.9339 | 98.31517 | 111.06582 |
| ENSMUSG Gtf3c4     | 6.783225 | 7.007332 | 5.651055 | 6.296477 | 6.703918 | 6.580844  |
| ENSMUSG Eci1       | 34.11512 | 37.91807 | 33.90754 | 30.41751 | 28.03664 | 30.71319  |
| ENSMUSG Cyp2a4     | 0.03105  | 0        | 0.087481 | 0        | 0        | 0.130986  |
| ENSMUSG Srbd1      | 3.768763 | 3.892528 | 3.405268 | 3.761395 | 4.16115  | 4.220918  |
| ENSMUSG Dnase1l2   | 0.512413 | 1.073128 | 1.35598  | 0.617255 | 1.143355 | 0.507687  |
| ENSMUSG E4f1       | 8.999159 | 8.449076 | 9.715601 | 7.760073 | 7.499064 | 7.354084  |
| ENSMUSG Acp1       | 5.469201 | 5.579333 | 5.437922 | 6.665988 | 6.021184 | 5.737786  |
| ENSMUSG Csnka2ip   | 0        | 0        | 0        | 0        | 0        | 0         |
| ENSMUSG Cirbp      | 29.28516 | 21.57939 | 21.11856 | 18.29099 | 12.93022 | 14.328497 |
| Mus_musc Mus_musc  | 0        | 0.308619 | 0.395558 | 0        | 0        | 0         |
| ENSMUSG Bcl2l10    | 0.038531 | 0        | 0        | 0.016831 | 0        | 0         |
| ENSMUSG Ldlr       | 21.97993 | 19.06787 | 23.03437 | 23.65597 | 19.77065 | 26.618462 |
| ENSMUSG Gnb5       | 4.862167 | 3.980843 | 4.087709 | 3.037001 | 3.045702 | 3.491166  |
| ENSMUSG Kank2      | 48.853   | 47.03016 | 45.70357 | 32.02903 | 32.50324 | 31.760844 |
| ENSMUSG Polr2m     | 64.11535 | 65.10471 | 61.9364  | 52.70254 | 52.60152 | 54.188307 |
| ENSMUSG Dock6      | 29.78546 | 24.57516 | 28.713   | 17.70179 | 17.16996 | 16.416565 |
| ENSMUSG Twist2     | 0.95892  | 0.983258 | 0.743261 | 0.579442 | 0.332815 | 0.246073  |
| ENSMUSG Rpl9-ps1   | 0        | 0        | 0        | 0        | 0        | 0.018866  |
| ENSMUSG Gm20821    | 0        | 0        | 0        | 0        | 0        | 0         |
| ENSMUSG AC117239   | 7.748721 | 6.757847 | 8.652484 | 8.502801 | 8.906857 | 9.072334  |
| ENSMUSG Dnah8      | 0.484389 | 0.462967 | 0.435106 | 1.073374 | 1.076589 | 1.387175  |
| ENSMUSG Tpsb2      | 0.393345 | 0.849571 | 0.078767 | 0.363194 | 0.729773 | 0.776397  |
| ENSMUSG Kif20b     | 0.53151  | 0.702298 | 0.657321 | 1.509989 | 1.578669 | 1.58018   |
| ENSMUSG Vps51      | 1.244836 | 1.742539 | 1.927699 | 2.728511 | 1.877809 | 2.495735  |
| ENSMUSG Sac3d1     | 6.692155 | 4.750716 | 5.469892 | 5.303112 | 7.358586 | 7.284606  |
| ENSMUSG Cdca5      | 0.485129 | 0.178764 | 0.826569 | 1.475909 | 1.283879 | 1.302499  |
| ENSMUSG Zfp1l1     | 16.56138 | 15.73884 | 16.34115 | 13.97967 | 15.06904 | 15.967833 |
| ENSMUSG Tnfrsf25   | 1.574809 | 1.958686 | 2.497833 | 1.942058 | 1.660246 | 2.400202  |
| ENSMUSG Spag11a    | 0        | 0        | 0        | 0        | 0        | 0         |
| ENSMUSG Htr7       | 0.034567 | 0.024504 | 0.180692 | 0.456959 | 0.315336 | 0.50168   |
| ENSMUSG Tm7sf2     | 16.08589 | 14.91889 | 15.2984  | 16.29383 | 16.37249 | 19.084586 |
| ENSMUSG Xlr4a      | 0.505921 | 0.404802 | 0.793756 | 0.635163 | 0.57775  | 0.810253  |
| ENSMUSG Olfr1177-ꜛ | 0        | 0        | 0        | 0        | 0        | 0         |
| ENSMUSG Pet100     | 3.309565 | 3.828832 | 3.416725 | 4.889548 | 4.405234 | 5.579302  |
| ENSMUSG Olfr1195   | 0        | 0        | 0        | 0        | 0        | 0         |
| ENSMUSG Olfr1196   | 0        | 0        | 0        | 0        | 0        | 0         |
| ENSMUSG Cst12      | 0        | 0        | 0        | 0        | 0        | 0         |
| ENSMUSG Cd80       | 0.484965 | 0.288874 | 0.737008 | 1.915436 | 1.794026 | 1.957749  |
| ENSMUSG Cst9       | 0        | 0.089396 | 0        | 0        | 0        | 0         |
| ENSMUSG 8030411Fꜛ  | 0        | 0        | 0        | 0        | 0        | 0         |
| ENSMUSG Olfr1179   | 0        | 0        | 0        | 0        | 0        | 0         |
| ENSMUSG 9230104LC  | 15.81498 | 12.07523 | 17.84155 | 11.14243 | 12.93981 | 10.292835 |
| ENSMUSG Ccdc84     | 4.660663 | 4.250113 | 4.739814 | 4.125814 | 3.801847 | 3.876548  |
| ENSMUSG Ncmap      | 0.787209 | 0.625749 | 1.089905 | 1.028935 | 1.39881  | 0.790542  |
| ENSMUSG Olfr544    | 0        | 0        | 0        | 0        | 0        | 0         |
| ENSMUSG Kih15      | 1.019225 | 1.737732 | 1.521637 | 1.42624  | 1.324054 | 1.531667  |
| ENSMUSG Mup5       | 0        | 0.092419 | 0        | 0.389232 | 0.51184  | 0         |
| ENSMUSG Dkk1       | 0.045788 | 0        | 0        | 0.016276 | 0        | 0         |

|                   |          |          |          |          |          |           |
|-------------------|----------|----------|----------|----------|----------|-----------|
| ENSMUSG Gm49405   | 0.793453 | 1.104707 | 1.151294 | 1.193457 | 0.681803 | 0.684983  |
| ENSMUSG Acy3      | 3.6996   | 3.380757 | 3.413746 | 2.464381 | 3.095123 | 3.587715  |
| ENSMUSG Pip5k1b   | 9.621137 | 10.08594 | 9.427038 | 10.2368  | 9.785785 | 10.058123 |
| ENSMUSG Klc2      | 11.83711 | 12.96323 | 12.86441 | 10.82169 | 10.45639 | 12.385579 |
| ENSMUSG Mbl2      | 0        | 0        | 0        | 0        | 0        | 0         |
| ENSMUSG Fgfr2     | 54.28781 | 54.51997 | 44.96073 | 49.72733 | 47.4937  | 57.760126 |
| ENSMUSG Coq4      | 2.287013 | 3.172299 | 2.270407 | 2.805463 | 3.559682 | 3.275737  |
| ENSMUSG Med27     | 11.88902 | 10.42529 | 10.45651 | 10.65235 | 8.989573 | 10.946113 |
| ENSMUSG Fam129b   | 108.5432 | 110.3529 | 107.4597 | 97.09888 | 93.86942 | 109.28108 |
| ENSMUSG Stxbp1    | 22.05644 | 20.68174 | 24.4449  | 12.06813 | 13.33663 | 12.780379 |
| ENSMUSG Bag3      | 22.8823  | 26.74189 | 26.1044  | 17.18699 | 16.71647 | 21.240728 |
| ENSMUSG Tial1     | 13.5339  | 14.08602 | 16.53356 | 15.06251 | 13.75249 | 12.124023 |
| ENSMUSG Lrsam1    | 4.133488 | 4.649054 | 5.287844 | 5.192633 | 4.254349 | 4.44238   |
| ENSMUSG Odf2      | 13.84865 | 14.87506 | 13.4179  | 13.26776 | 12.38992 | 13.266122 |
| ENSMUSG Lamtor1   | 40.15664 | 40.08432 | 38.38575 | 43.89304 | 43.51675 | 48.649461 |
| ENSMUSG Dgkz      | 54.4374  | 48.22938 | 51.11478 | 41.39637 | 43.40533 | 43.682434 |
| ENSMUSG Prdm13    | 0        | 0        | 0        | 0        | 0        | 0         |
| ENSMUSG Cfap69    | 3.016895 | 3.540675 | 3.089791 | 3.734541 | 3.505821 | 3.065344  |
| ENSMUSG Rabgga    | 9.432849 | 8.249885 | 9.937012 | 9.109543 | 8.639602 | 7.704561  |
| ENSMUSG Ggt6      | 0.751815 | 0.40521  | 0.464296 | 0.32774  | 0.663795 | 0.500788  |
| ENSMUSG H2afb2    | 0        | 0        | 0        | 0        | 0        | 0         |
| ENSMUSG Wfdc18    | 0        | 0        | 0        | 0        | 0        | 0         |
| Mus_musc Mus_musc | 0        | 0        | 0        | 0.120154 | 0.205362 | 0         |
| Mus_musc Mus_musc | 0.295892 | 0.115353 | 0.153783 | 0.257622 | 0.145322 | 0.230315  |
| Mus_musc Mus_musc | 0        | 0        | 0        | 0.303517 | 0        | 0         |
| Mus_musc Mus_musc | 0        | 0        | 0        | 0        | 0        | 0.184186  |
| Mus_musc Mus_musc | 0        | 0        | 0.337872 | 0        | 0        | 0         |
| Mus_musc Mus_musc | 0.616775 | 0.392424 | 0        | 0        | 0        | 0.289776  |
| Mus_musc Mus_musc | 0.761309 | 0.680588 | 0.78692  | 0.428465 | 1.16495  | 0.385753  |
| ENSMUSG Il24      | 0        | 0        | 0        | 0        | 0        | 0         |
| ENSMUSG Csrp1     | 218.1678 | 222.6345 | 231.2356 | 194.3976 | 198.7691 | 208.28284 |
| ENSMUSG Gpr37l1   | 0        | 0.055426 | 0.03812  | 0.040724 | 0.098735 | 0.07184   |
| ENSMUSG Srgap2    | 15.86084 | 13.78748 | 14.65401 | 13.83218 | 12.87867 | 11.759488 |
| ENSMUSG Arl8a     | 34.14813 | 31.88161 | 35.26235 | 28.7805  | 27.98278 | 30.083365 |
| ENSMUSG Eif2d     | 16.01535 | 16.58087 | 18.09922 | 16.1779  | 15.89906 | 16.705008 |
| ENSMUSG Ube2t     | 0.814803 | 0.455046 | 0.87874  | 1.496446 | 1.658484 | 1.448404  |
| ENSMUSG Gm21972   | 0        | 0        | 0.053881 | 0        | 0        | 0         |
| ENSMUSG Gm3468    | 0.137441 | 0.195432 | 0.107722 | 0.070497 | 0        | 0.022046  |
| ENSMUSG Vmn1r204  | 0        | 0        | 0        | 0        | 0        | 0         |
| ENSMUSG Gm1113    | 0        | 0        | 0        | 0        | 0        | 0.021491  |
| ENSMUSG Gm10310   | 0        | 0        | 0        | 0        | 0        | 0         |
| ENSMUSG 1700113H  | 0        | 0.148289 | 0.142269 | 0.112305 | 0        | 0         |
| ENSMUSG Cltc      | 69.581   | 67.23102 | 61.35652 | 60.65174 | 68.24904 | 67.578802 |
| ENSMUSG Ticam1    | 3.638207 | 4.005027 | 4.916991 | 6.486813 | 5.855663 | 6.289726  |
| ENSMUSG Fzd10     | 0.10524  | 0.145668 | 0.133642 | 0.284637 | 0.204155 | 0.235362  |
| ENSMUSG Itpkc     | 2.883664 | 2.522525 | 3.020703 | 2.18402  | 2.713704 | 3.019348  |
| ENSMUSG Olfr945   | 0        | 0        | 0        | 0        | 0        | 0         |
| Mus_musc Mus_musc | 0        | 0.185676 | 0        | 0        | 0        | 0         |
| Mus_musc Mus_musc | 0        | 0.230808 | 0.037975 | 0        | 0        | 0.044088  |
| Mus_musc Mus_musc | 0.420176 | 0        | 0        | 0        | 0        | 0.15151   |
| Mus_musc Mus_musc | 0.122272 | 0.152655 | 0.358182 | 0.41113  | 0.250983 | 0.442013  |
| Mus_musc Mus_musc | 0.195728 | 0.610347 | 0.395546 | 0.511204 | 0.414544 | 0.430568  |
| Mus_musc Mus_musc | 0        | 0        | 0.228165 | 0.147671 | 0.19413  | 0.096863  |
| Mus_musc Mus_musc | 0.25901  | 0        | 0        | 0.097096 | 0.073255 | 0.189981  |
| Mus_musc Mus_musc | 0        | 0        | 0        | 0        | 0        | 0.498924  |
| Mus_musc Mus_musc | 0        | 0.400117 | 0.054443 | 0.139598 | 0.273712 | 0         |
| Mus_musc Mus_musc | 0.307866 | 0.536371 | 0.42622  | 0.807291 | 0.747236 | 0.597354  |
| Mus_musc Mus_musc | 0.736555 | 0.975804 | 1.209797 | 1.101519 | 0.958783 | 0.994859  |
| Mus_musc Mus_musc | 1.089031 | 0.657444 | 1.432388 | 0.446507 | 0.851385 | 0.327329  |
| Mus_musc Mus_musc | 1.699287 | 2.1018   | 1.018807 | 0.84922  | 1.093626 | 0.798754  |
| Mus_musc Mus_musc | 0        | 0        | 0        | 0        | 0        | 0         |
| ENSMUSG Crkl      | 15.95843 | 16.50423 | 15.61768 | 12.83178 | 13.20162 | 13.877625 |
| ENSMUSG Wt1       | 2.146864 | 3.246923 | 1.698009 | 1.930069 | 1.266159 | 2.040841  |
| ENSMUSG Gfy       | 0        | 0        | 0        | 0        | 0        | 0         |

|                    |          |          |          |          |          |           |
|--------------------|----------|----------|----------|----------|----------|-----------|
| ENSMUSG Vmn1r107   | 0        | 0        | 0        | 0        | 0        | 0         |
| Mus_musc Mus_musc  | 0.700268 | 0.637719 | 0.700956 | 1.345108 | 1.391115 | 1.282333  |
| Mus_musc Mus_musc  | 0        | 0.268102 | 0        | 0        | 0        | 0         |
| Mus_musc Mus_musc  | 0.154807 | 0.473486 | 0        | 0.252079 | 0.62653  | 0.484895  |
| Mus_musc Mus_musc  | 0.106207 | 0.449438 | 0.559814 | 0.41081  | 0.080285 | 0.067742  |
| ENSMUSG Ifna9      | 0        | 0        | 0        | 0        | 0        | 0         |
| Mus_musc Mus_musc  | 0        | 0        | 0        | 0        | 0.238227 | 0.176512  |
| ENSMUSG Ube2z      | 23.93046 | 23.85785 | 23.66038 | 22.71921 | 22.1467  | 20.755684 |
| Mus_musc Mus_musc  | 0.682838 | 0.424697 | 0.495871 | 0.512568 | 0.430888 | 0.605158  |
| Mus_musc Mus_musc  | 0.166625 | 0        | 0.15958  | 0.261292 | 0        | 0         |
| ENSMUSG Gimap8     | 25.91606 | 23.34525 | 25.95478 | 20.47748 | 19.34834 | 19.249048 |
| Mus_musc Mus_musc  | 0.118619 | 0.238459 | 0.308152 | 0.239649 | 0.227378 | 0.258355  |
| ENSMUSG Zfp428     | 1.800423 | 1.685851 | 1.687118 | 1.618357 | 2.003976 | 1.970911  |
| ENSMUSG Hvcn1      | 12.48065 | 11.38255 | 11.442   | 34.80952 | 32.84796 | 37.490899 |
| ENSMUSG Btd35f21   | 0        | 0        | 0        | 0        | 0        | 0         |
| Mus_musc Mus_musc  | 0.136774 | 0.250924 | 0.464777 | 0.162157 | 0.070367 | 0.289865  |
| Mus_musc Mus_musc  | 0.556007 | 0        | 0        | 0.452604 | 0        | 0         |
| Mus_musc Mus_musc  | 0.342676 | 0.295003 | 0.375046 | 0.132882 | 0.321119 | 0.22612   |
| ENSMUSG Gzmb       | 3.934    | 1.940299 | 14.83874 | 2.974755 | 1.886817 | 3.109555  |
| ENSMUSG Igtp       | 18.99545 | 16.743   | 202.7301 | 98.00735 | 15.45917 | 20.503318 |
| ENSMUSG Hist3h2a   | 12.89873 | 16.17596 | 15.72389 | 12.463   | 12.80386 | 11.523037 |
| ENSMUSG Ppp1r17    | 0        | 0        | 0        | 0        | 0        | 0         |
| ENSMUSG Ifna7      | 0        | 0        | 0        | 0        | 0        | 0         |
| ENSMUSG Rarb       | 1.74531  | 2.768927 | 1.801376 | 1.785762 | 1.70145  | 1.994644  |
| ENSMUSG Gm5157     | 0        | 0        | 0        | 0        | 0        | 0         |
| ENSMUSG Igfbp4     | 77.26423 | 58.31475 | 59.64761 | 47.02745 | 56.60276 | 54.068571 |
| Mus_musc Mus_musc  | 0.188031 | 0.327693 | 0.081928 | 0        | 0        | 0         |
| ENSMUSG C7         | 50.3933  | 52.8839  | 51.18763 | 59.01743 | 72.34049 | 63.309105 |
| Mus_musc Mus_musc  | 0.092977 | 0        | 0.16987  | 0        | 0.232076 | 0         |
| ENSMUSG Tgm7       | 0        | 0.041331 | 0        | 0        | 0        | 0         |
| Mus_musc Mus_musc  | 0.644345 | 0.748634 | 0.934399 | 0.336495 | 0.269208 | 0.083825  |
| Mus_musc Mus_musc  | 0.05628  | 0.063852 | 0.195966 | 0.492526 | 0.313643 | 0.24465   |
| Mus_musc Mus_musc  | 0        | 0        | 0        | 0        | 0        | 0         |
| ENSMUSG Pms2       | 1.956838 | 2.081975 | 2.048965 | 2.168884 | 1.812369 | 1.950756  |
| ENSMUSG Srp54c     | 15.68986 | 16.67016 | 16.92144 | 15.12587 | 15.35282 | 12.732216 |
| ENSMUSG Tnfrsf13b  | 2.992041 | 2.317646 | 3.325132 | 12.82178 | 14.18703 | 12.190979 |
| Mus_musc Mus_musc  | 0.024028 | 0.546617 | 0.157192 | 7.366957 | 3.467027 | 2.894422  |
| Mus_musc Mus_musc  | 5.074288 | 5.116823 | 1.720585 | 958.5353 | 465.0675 | 22.384029 |
| Mus_musc Mus_musc  | 1.483745 | 1.155378 | 0.346376 | 37.02008 | 20.70697 | 15.416228 |
| Mus_musc Mus_musc  | 2.207222 | 2.958375 | 0.885132 | 166.2847 | 6.527984 | 351.31903 |
| Mus_musc Mus_musc  | 0.198302 | 0.657328 | 0.225131 | 38.56261 | 1.077248 | 77.653343 |
| Mus_musc Mus_musc  | 0.286135 | 1.496353 | 0.192931 | 22.65161 | 160.4047 | 53.673191 |
| Mus_musc Mus_musc  | 2.685854 | 2.779048 | 0.87127  | 106.2591 | 851.3358 | 114.79813 |
| Mus_musc Mus_musc  | 2.130241 | 2.901476 | 0.998029 | 55.7289  | 320.3965 | 103.99566 |
| Mus_musc Mus_musc  | 1.031181 | 0.768574 | 0.635562 | 282.0544 | 484.8448 | 35.590168 |
| Mus_musc Mus_musc  | 0.017739 | 0.191288 | 0        | 1.106209 | 1.351504 | 0.829314  |
| ENSMUSG Gm773      | 0        | 0        | 0        | 0        | 0        | 0         |
| ENSMUSG Olfr839-ps | 0        | 0        | 0        | 0        | 0        | 0         |
| ENSMUSG Tpcn2      | 3.243191 | 4.519312 | 4.396179 | 7.165163 | 6.951084 | 7.811561  |
| ENSMUSG Cacna2d4   | 1.577918 | 1.473716 | 1.206803 | 1.013765 | 0.914674 | 0.843391  |
| ENSMUSG Gpr12      | 0        | 0        | 0        | 0        | 0        | 0         |
| ENSMUSG Vmn2r58    | 0        | 0        | 0        | 0        | 0        | 0         |
| ENSMUSG Yae1d1     | 5.123784 | 6.527857 | 4.839179 | 5.760731 | 4.773207 | 5.324269  |
| Mus_musc Mus_musc  | 0.210434 | 0.182441 | 0        | 0        | 0.25992  | 0         |
| ENSMUSG Ndufa4l2   | 21.6111  | 22.67207 | 28.05446 | 15.89031 | 14.84364 | 14.67829  |
| ENSMUSG Oog1       | 0        | 0        | 0        | 0        | 0        | 0         |
| ENSMUSG Ppp1r13l   | 4.079631 | 3.446788 | 3.422614 | 2.80948  | 2.489367 | 2.203001  |
| ENSMUSG Wdr33      | 13.9985  | 13.63214 | 13.50798 | 12.73167 | 12.31827 | 12.277646 |
| ENSMUSG Eif4h      | 140.5417 | 136.0882 | 152.9798 | 128.4332 | 126.434  | 136.1087  |
| ENSMUSG Erg        | 55.34203 | 48.82137 | 50.96213 | 32.76621 | 34.24104 | 29.312928 |
| ENSMUSG Ints8      | 14.28616 | 14.63213 | 12.57463 | 11.8429  | 12.13865 | 11.933521 |
| ENSMUSG Gm44973    | 0.637808 | 0.858622 | 0.481472 | 0.340026 | 0        | 0.646842  |
| ENSMUSG Pcdha3     | 0        | 0.021007 | 0        | 0        | 0.016613 | 0         |
| ENSMUSG Tnf        | 0.811884 | 0.242725 | 0.322618 | 0.798195 | 0.386142 | 0.481536  |

|                   |          |          |          |          |          |           |
|-------------------|----------|----------|----------|----------|----------|-----------|
| ENSMUSG Rasal3    | 4.653114 | 2.850792 | 5.761677 | 10.06142 | 8.76766  | 9.91204   |
| ENSMUSG Ppp4r2    | 18.27236 | 21.44722 | 17.1337  | 16.93686 | 15.80469 | 15.521755 |
| ENSMUSG Rps10     | 158.9884 | 153.63   | 234.8503 | 293.7923 | 270.2419 | 293.43872 |
| ENSMUSG Lta       | 0.360185 | 0.258893 | 0.153913 | 0.623426 | 0.608173 | 0.523979  |
| ENSMUSG Cd83      | 4.784009 | 4.512046 | 4.454336 | 15.33458 | 15.22342 | 17.100161 |
| ENSMUSG Ldb1      | 56.77083 | 55.78611 | 66.39049 | 50.6799  | 49.46812 | 47.905024 |
| ENSMUSG Kcnip2    | 0.16359  | 0.624971 | 0.407564 | 0.275795 | 0.313129 | 0.36866   |
| ENSMUSG Mgea5     | 22.80797 | 23.29307 | 21.27562 | 22.60832 | 21.7843  | 21.207005 |
| ENSMUSG Mfsd13a   | 3.59163  | 2.754372 | 3.209881 | 3.017523 | 2.997975 | 4.313128  |
| ENSMUSG Fbxl15    | 3.188056 | 3.726213 | 3.226749 | 4.038357 | 3.44997  | 3.195169  |
| ENSMUSG Nfkb2     | 12.03991 | 10.56235 | 12.79684 | 18.51643 | 18.20623 | 21.641281 |
| ENSMUSG Gbf1      | 13.37575 | 13.07527 | 12.49523 | 12.20756 | 13.81667 | 13.541413 |
| ENSMUSG Pitx3     | 0        | 0        | 0        | 0        | 0        | 0         |
| ENSMUSG Actr1a    | 55.36028 | 53.46037 | 56.05889 | 45.18375 | 47.63051 | 48.562935 |
| ENSMUSG Trhr2     | 0        | 0        | 0        | 0        | 0.09878  | 0         |
| ENSMUSG Kif27     | 1.454452 | 2.353067 | 1.046432 | 1.861495 | 1.748037 | 1.553333  |
| ENSMUSG Kik1b22   | 0        | 0        | 0        | 0        | 0        | 0         |
| ENSMUSG Olfr1371  | 0        | 0        | 0        | 0        | 0        | 0         |
| ENSMUSG Cpa4      | 0        | 0        | 0        | 0.052097 | 0        | 0.016543  |
| ENSMUSG Ubr2      | 17.27993 | 16.08155 | 14.33097 | 13.22488 | 14.31471 | 13.237457 |
| ENSMUSG Rrp36     | 12.83236 | 14.55311 | 16.13707 | 12.94477 | 14.57678 | 14.309753 |
| ENSMUSG Cnpy3     | 22.62584 | 21.87623 | 24.69739 | 22.88226 | 22.94584 | 23.971643 |
| ENSMUSG Ptk7      | 18.24715 | 17.42163 | 19.28369 | 14.6424  | 15.00757 | 16.117819 |
| ENSMUSG Guca1b    | 0        | 0        | 0        | 0        | 0        | 0         |
| ENSMUSG Prph2     | 0        | 0.015518 | 0        | 0        | 0        | 0         |
| ENSMUSG Ica1      | 16.46069 | 15.2935  | 16.76208 | 13.27815 | 13.05921 | 12.25664  |
| ENSMUSG Rpl35     | 144.3371 | 147.592  | 144.0297 | 180.3853 | 163.4602 | 165.29326 |
| ENSMUSG Nrg1      | 2.074255 | 2.004938 | 1.531883 | 1.511655 | 1.704655 | 1.021112  |
| ENSMUSG Mmp7      | 0        | 0        | 0        | 0        | 0        | 0.059671  |
| ENSMUSG Mmp20     | 0        | 0        | 0        | 0        | 0        | 0         |
| ENSMUSG Sp7       | 0        | 0        | 0        | 0        | 0        | 0         |
| ENSMUSG Ppih      | 1.661574 | 1.578573 | 1.274519 | 1.515767 | 1.605028 | 1.307365  |
| ENSMUSG Vmn1r236  | 0        | 0        | 0        | 0        | 0        | 0         |
| ENSMUSG Gm6217    | 0        | 0        | 0        | 0.054157 | 0        | 0         |
| ENSMUSG Epb41l2   | 99.49652 | 94.0159  | 87.97726 | 61.58885 | 62.01818 | 52.624202 |
| ENSMUSG Apaf1     | 5.161086 | 5.066715 | 4.94646  | 5.974672 | 6.089266 | 5.309324  |
| ENSMUSG Ikbip     | 9.142909 | 8.995377 | 9.62774  | 8.332714 | 8.851782 | 8.599189  |
| ENSMUSG Hbs1l     | 16.75236 | 17.37581 | 15.66597 | 14.99583 | 15.36801 | 16.559226 |
| ENSMUSG Sgk1      | 103.4096 | 82.33142 | 95.64537 | 69.27753 | 77.36359 | 77.608952 |
| ENSMUSG Cep290    | 2.698747 | 2.297419 | 1.887417 | 2.188189 | 2.109305 | 1.876657  |
| ENSMUSG Zkscan7   | 3.178231 | 3.723971 | 2.929555 | 3.32699  | 2.747415 | 3.403067  |
| ENSMUSG Snu13     | 29.37121 | 28.33329 | 30.51567 | 26.05574 | 27.49141 | 26.059298 |
| ENSMUSG Olfr558   | 0.037099 | 0        | 0        | 0        | 0        | 0.01817   |
| ENSMUSG Olfr658   | 0        | 0        | 0        | 0        | 0        | 0         |
| ENSMUSG Cpeb4     | 18.85329 | 18.64469 | 17.19979 | 18.3651  | 19.69126 | 19.951902 |
| ENSMUSG Cdc34     | 27.64627 | 27.73512 | 28.65085 | 35.20226 | 30.86537 | 33.383723 |
| ENSMUSG Rnf121    | 10.75422 | 11.88886 | 11.89446 | 9.810802 | 11.21134 | 9.971834  |
| ENSMUSG Asb3      | 2.933755 | 3.152121 | 3.571336 | 3.065172 | 2.934936 | 3.734624  |
| ENSMUSG Hsd3b2    | 0.254738 | 0.210729 | 0.159746 | 0.09094  | 0.145666 | 0.043417  |
| ENSMUSG Hcst      | 3.564472 | 2.361614 | 4.286478 | 5.881402 | 5.346178 | 4.980516  |
| ENSMUSG Chac2     | 2.809877 | 3.61941  | 4.915478 | 4.807181 | 5.200349 | 3.936023  |
| ENSMUSG Tpgs1     | 18.65854 | 18.40128 | 20.95643 | 22.08399 | 22.3129  | 22.508993 |
| ENSMUSG Gm42517   | 0.143107 | 0.320713 | 0.1304   | 0.214087 | 0.088906 | 0.339401  |
| ENSMUSG Gm21830   | 0        | 0        | 0        | 0        | 0        | 0         |
| ENSMUSG Cyb5a     | 118.8539 | 127.6956 | 120.8795 | 89.92676 | 90.57129 | 88.990407 |
| ENSMUSG Zscan4c   | 0        | 0        | 0        | 0        | 0        | 0         |
| ENSMUSG Arfgap3   | 18.37314 | 15.99051 | 18.91635 | 18.52359 | 20.93404 | 19.461561 |
| ENSMUSG Dnah1     | 0.661039 | 0.787423 | 0.399386 | 1.008055 | 0.882887 | 1.04258   |
| ENSMUSG Zfp7      | 5.764971 | 6.14322  | 5.210799 | 5.243224 | 5.957587 | 4.915887  |
| ENSMUSG Spata3    | 0        | 0        | 0        | 0        | 0        | 0.033187  |
| ENSMUSG 2810459M  | 0.107189 | 0.138466 | 0.172943 | 0.120416 | 0.078298 | 0.125555  |
| ENSMUSG 4933407L2 | 0.045941 | 0        | 0        | 0.040999 | 0        | 0         |
| ENSMUSG Sp100     | 39.53507 | 35.41116 | 55.87574 | 39.94188 | 31.74776 | 35.925844 |
| ENSMUSG Itm2c     | 77.02998 | 74.91013 | 78.27519 | 87.24296 | 86.10222 | 88.426201 |

|                   |          |          |          |          |          |           |
|-------------------|----------|----------|----------|----------|----------|-----------|
| ENSMUSG Slc16a14  | 0.085895 | 0.250157 | 0.134011 | 0.071788 | 0.089009 | 0.062263  |
| ENSMUSG Htr2b     | 0.195253 | 0.112306 | 0.024255 | 2.341928 | 2.251201 | 3.118687  |
| ENSMUSG Psm1      | 33.5302  | 35.65474 | 33.64568 | 29.41321 | 33.35902 | 33.273411 |
| ENSMUSG Defa5     | 0        | 0        | 0        | 0        | 0        | 0         |
| ENSMUSG H2-Ke6    | 25.10336 | 18.70244 | 20.94396 | 19.03776 | 18.36769 | 20.151106 |
| ENSMUSG Zfp414    | 10.64475 | 9.887838 | 10.63678 | 10.33324 | 10.42086 | 9.392424  |
| ENSMUSG H2-Ab1    | 174.6838 | 171.6749 | 463.6875 | 466.9508 | 355.3213 | 450.95538 |
| ENSMUSG Defa28    | 0        | 0        | 0        | 0        | 0        | 0         |
| ENSMUSG Smcp      | 0        | 0        | 0        | 0        | 0        | 0         |
| ENSMUSG Cyp4f15   | 3.4562   | 3.406491 | 2.225361 | 2.178125 | 2.827088 | 1.84404   |
| ENSMUSG Defa29    | 0        | 0        | 0        | 0        | 0        | 0         |
| ENSMUSG Cox7b2    | 0        | 0        | 0        | 0        | 0        | 0         |
| ENSMUSG Krt8      | 96.29322 | 94.83572 | 80.78248 | 73.63311 | 69.58732 | 85.119492 |
| ENSMUSG Mybpc2    | 0.851323 | 0.537328 | 0.533241 | 0.51058  | 0.422501 | 0.639067  |
| ENSMUSG Arfrp1    | 14.22326 | 13.79559 | 15.22631 | 12.09514 | 11.98323 | 11.671074 |
| ENSMUSG Ucn       | 0        | 0        | 0        | 0        | 0        | 0         |
| ENSMUSG Scube3    | 0.342111 | 0.437002 | 0.64384  | 0.854028 | 0.914289 | 0.933334  |
| ENSMUSG Ranbp6    | 6.460884 | 6.999131 | 6.867892 | 6.212852 | 5.372945 | 5.78232   |
| ENSMUSG Trps1     | 2.487094 | 2.820629 | 2.084329 | 2.762312 | 2.840852 | 2.81313   |
| ENSMUSG Dusp3     | 52.2828  | 52.32015 | 47.88556 | 34.20011 | 34.72149 | 35.312753 |
| ENSMUSG Slc6a1    | 0        | 0        | 0        | 0        | 0        | 0.027401  |
| ENSMUSG Dennd5b   | 4.497755 | 4.62593  | 4.130371 | 4.783554 | 5.384158 | 4.912528  |
| ENSMUSG Vgll4     | 29.14196 | 30.15032 | 29.71647 | 24.24771 | 25.26293 | 28.354783 |
| ENSMUSG Atg7      | 14.21698 | 10.57183 | 13.19935 | 14.74393 | 13.68895 | 12.986996 |
| ENSMUSG Timp4     | 0.367667 | 0.490068 | 0.406349 | 0.719958 | 0.638802 | 0.354755  |
| ENSMUSG Tamm41    | 4.97476  | 4.297864 | 5.856448 | 4.411518 | 4.400447 | 4.163319  |
| ENSMUSG Cand2     | 0.790762 | 0.870325 | 0.584085 | 0.678407 | 0.86124  | 0.793775  |
| ENSMUSG Insig1    | 25.99972 | 22.2131  | 25.17189 | 36.39754 | 32.13441 | 41.915279 |
| ENSMUSG Tnfsf14   | 1.711931 | 1.674427 | 2.442028 | 2.292171 | 2.021169 | 2.16895   |
| ENSMUSG Gpr108    | 21.09548 | 21.32531 | 20.89691 | 22.66006 | 24.29833 | 22.149298 |
| ENSMUSG BC051665  | 0        | 0        | 0        | 0        | 0        | 0         |
| ENSMUSG Spatc1    | 0.151419 | 0.060833 | 0.188835 | 0.23419  | 0.256926 | 0.264768  |
| ENSMUSG Gm43191   | 0        | 0        | 0        | 0        | 0        | 0         |
| ENSMUSG Zbtb5     | 3.525559 | 3.903098 | 3.55751  | 3.914411 | 4.011516 | 4.171943  |
| ENSMUSG Bdp1      | 6.998635 | 7.412503 | 6.257558 | 6.584382 | 6.685731 | 6.336923  |
| ENSMUSG Ang6      | 0        | 0        | 0        | 0        | 0        | 0         |
| ENSMUSG Psm14     | 21.28928 | 21.597   | 23.78277 | 26.56818 | 25.06572 | 26.728209 |
| ENSMUSG Strbp     | 3.92506  | 5.872389 | 4.322675 | 7.604002 | 7.917763 | 7.805941  |
| ENSMUSG Ccin      | 0        | 0.07155  | 0.027938 | 0.026896 | 0        | 0.085973  |
| ENSMUSG Wdr5      | 13.16832 | 14.9013  | 13.39396 | 12.12221 | 12.30893 | 11.87422  |
| ENSMUSG Rmi1      | 6.010266 | 6.682259 | 5.608568 | 5.737526 | 6.404219 | 5.861309  |
| ENSMUSG Parpbp    | 0.224445 | 0.175992 | 0.093104 | 0.365786 | 0.456983 | 0.582437  |
| ENSMUSG 4930524J0 | 0.168075 | 0.227753 | 0.450216 | 0        | 0.60497  | 0.123402  |
| ENSMUSG Foxe1     | 0        | 0        | 0        | 0        | 0        | 0         |
| ENSMUSG Brd3      | 14.78945 | 15.23347 | 13.43149 | 12.7929  | 12.21587 | 13.668745 |
| ENSMUSG Lcn4      | 0        | 0        | 0        | 0        | 0        | 0         |
| ENSMUSG Cideb     | 0.105247 | 0.322083 | 0.377047 | 1.216776 | 0.805198 | 0.671157  |
| ENSMUSG Tgm1      | 1.85485  | 1.356864 | 1.300139 | 1.759862 | 2.228254 | 2.629875  |
| ENSMUSG Cpne6     | 0        | 0        | 0        | 0        | 0        | 0         |
| ENSMUSG Carmil3   | 0.240988 | 0.279696 | 0.194423 | 0.370947 | 0.407984 | 0.489742  |
| ENSMUSG Dhrr4     | 14.02244 | 13.49643 | 13.81262 | 14.82516 | 15.45752 | 16.506819 |
| ENSMUSG Emc9      | 6.556642 | 8.578562 | 6.488784 | 9.381687 | 5.602532 | 8.574521  |
| ENSMUSG Psme1     | 87.3499  | 80.42182 | 126.1894 | 95.9249  | 80.29746 | 92.503544 |
| ENSMUSG Fitm1     | 0.0581   | 0.463098 | 0.194511 | 0.210038 | 0.101133 | 0         |
| ENSMUSG Dcaf11    | 35.13839 | 37.52335 | 33.39084 | 34.08688 | 33.68902 | 36.84734  |
| ENSMUSG Fam167a   | 6.377026 | 6.994215 | 4.778525 | 6.719795 | 8.155292 | 7.792023  |
| ENSMUSG Secisbp2l | 33.28322 | 35.49165 | 29.59155 | 28.02699 | 28.76499 | 27.291198 |
| ENSMUSG Herpud2   | 22.01787 | 21.28755 | 21.47731 | 17.04874 | 16.96161 | 17.853714 |
| ENSMUSG Prkaa2    | 4.729737 | 4.64595  | 3.543886 | 3.127585 | 3.556818 | 2.760945  |
| ENSMUSG Dab1      | 0.10905  | 0.036165 | 0.024288 | 0.050411 | 0.139899 | 0.036432  |
| ENSMUSG Plpp3     | 80.30814 | 76.02831 | 78.56355 | 57.04128 | 62.59125 | 55.01519  |
| ENSMUSG Usp24     | 9.395828 | 9.808565 | 8.80543  | 9.582382 | 9.637421 | 10.186184 |
| ENSMUSG Cxcr6     | 1.673549 | 2.043683 | 2.23908  | 4.902813 | 3.502996 | 4.884008  |
| ENSMUSG Rpl7      | 406.4848 | 409.0364 | 406.056  | 398.561  | 391.5504 | 405.16136 |

|                          |          |          |          |          |          |           |
|--------------------------|----------|----------|----------|----------|----------|-----------|
| ENSMUSG Olfr1326- $\rho$ | 0        | 0        | 0        | 0        | 0        | 0         |
| ENSMUSG Fam43a           | 24.1485  | 23.04081 | 23.98514 | 16.94606 | 17.29573 | 17.676908 |
| ENSMUSG Zfp526           | 5.40735  | 5.294771 | 4.679383 | 4.791159 | 4.105437 | 4.684052  |
| ENSMUSG Nkx1-2           | 0        | 0        | 0        | 0        | 0        | 0         |
| ENSMUSG Col6a6           | 0.297154 | 0.146138 | 0.188906 | 0.626327 | 0.440266 | 0.619354  |
| Mus_musc Mus_musc        | 6.57656  | 5.64355  | 7.202966 | 5.993998 | 5.401642 | 5.796392  |
| Mus_musc Mus_musc        | 0.151779 | 0.457473 | 0.400518 | 0.296252 | 0.085667 | 0.602275  |
| Mus_musc Mus_musc        | 0.299445 | 0.238349 | 0.335813 | 0.614122 | 0.494969 | 0.808729  |
| Mus_musc Mus_musc        | 0        | 0        | 0.212967 | 0        | 0        | 0.574602  |
| Mus_musc Mus_musc        | 0        | 0        | 0        | 0        | 0        | 0         |
| ENSMUSG Csde1            | 79.71068 | 79.85267 | 75.80824 | 67.07074 | 61.50525 | 62.366408 |
| Mus_musc Mus_musc        | 0.441203 | 0.628099 | 0.446562 | 0.45383  | 0.263598 | 0.225742  |
| Mus_musc Mus_musc        | 0.168256 | 0.500841 | 0.596245 | 0.235744 | 1.062943 | 0.233436  |
| ENSMUSG Olfr1083- $\rho$ | 0        | 0        | 0        | 0        | 0        | 0         |
| ENSMUSG Sln              | 0.420289 | 7.764402 | 1.028614 | 2.08727  | 1.786042 | 0.703346  |
| ENSMUSG Dstyk            | 9.982193 | 10.48986 | 8.540782 | 7.67961  | 8.002228 | 7.810148  |
| ENSMUSG Crabp2           | 0        | 0        | 0        | 0        | 0.060159 | 0.339488  |
| ENSMUSG 2010003K:        | 0        | 0        | 0        | 0.074984 | 0        | 0         |
| ENSMUSG Lbr              | 24.13631 | 21.11865 | 26.91693 | 19.5454  | 19.53752 | 20.649313 |
| ENSMUSG Tbca             | 43.52457 | 44.97922 | 45.3168  | 56.42408 | 42.64918 | 45.806502 |
| ENSMUSG Olfr711          | 0        | 0        | 0        | 0        | 0        | 0         |
| ENSMUSG Gm4779           | 0        | 0        | 0        | 0        | 0        | 0         |
| ENSMUSG Synrg            | 17.73095 | 18.38109 | 15.28368 | 16.53047 | 16.2089  | 16.065052 |
| ENSMUSG Tmem106:         | 10.6503  | 9.957848 | 10.89956 | 20.86264 | 19.92046 | 23.294022 |
| ENSMUSG Zfr2             | 1.401193 | 1.272005 | 1.080336 | 1.218041 | 1.315889 | 0.981239  |
| ENSMUSG Ubtd2            | 6.165276 | 7.029153 | 7.907614 | 6.183764 | 5.772705 | 7.474649  |
| ENSMUSG Cfap43           | 16.5503  | 15.88642 | 16.05567 | 14.53523 | 12.87357 | 13.373988 |
| ENSMUSG Clca4b           | 0        | 0        | 0        | 0        | 0        | 0         |
| ENSMUSG Zfp791           | 3.467233 | 3.59204  | 1.757076 | 1.183082 | 1.716557 | 1.417659  |
| ENSMUSG Krtdap           | 0        | 0        | 0        | 0        | 0        | 0         |
| ENSMUSG Wdr77            | 7.601248 | 6.463733 | 6.787488 | 5.954381 | 6.746188 | 6.677217  |
| ENSMUSG Hic2             | 0.8499   | 0.850328 | 0.931675 | 0.82659  | 0.701497 | 0.838027  |
| ENSMUSG Gm9112           | 0        | 0        | 0        | 0        | 0        | 0         |
| ENSMUSG Sssca1           | 12.6258  | 10.62088 | 12.8877  | 14.85319 | 14.06039 | 14.336165 |
| ENSMUSG Rab7             | 173.5342 | 170.1931 | 181.4381 | 157.3557 | 166.5663 | 160.44175 |
| ENSMUSG 1700011M         | 0        | 0.051069 | 0        | 0        | 0        | 0         |
| ENSMUSG Apol10b          | 0.292704 | 0.288774 | 1.509645 | 0.982013 | 0.518194 | 0.736903  |
| ENSMUSG Olfr350          | 0        | 0        | 0        | 0        | 0        | 0         |
| ENSMUSG Mymx             | 0        | 0        | 0        | 0        | 0.069661 | 0         |
| ENSMUSG Utp14b           | 0.517962 | 0.621282 | 0.541697 | 0.75513  | 0.62648  | 0.799178  |
| Mus_musc Mus_musc        | 0        | 0        | 0        | 0.066758 | 0.071621 | 0.545022  |
| Mus_musc Mus_musc        | 0.604485 | 0.475107 | 0.867293 | 0.563039 | 0.416754 | 0.302506  |
| Mus_musc Mus_musc        | 0        | 0.142285 | 0        | 0.141247 | 0        | 0.235017  |
| Mus_musc Mus_musc        | 0.230161 | 0.172232 | 0.21863  | 0.134309 | 0.030153 | 0.328877  |
| Mus_musc Mus_musc        | 2.423486 | 1.840125 | 0.914468 | 1.469331 | 2.396647 | 1.31047   |
| ENSMUSG Otos             | 0        | 0        | 0        | 0        | 0        | 0         |
| ENSMUSG Efcab9           | 0.137584 | 0.171873 | 0.31315  | 0.092316 | 0.410101 | 0.318358  |
| Mus_musc Mus_musc        | 0.074535 | 0        | 0        | 0        | 0.201493 | 0         |
| ENSMUSG Cd101            | 1.77272  | 1.349493 | 1.683777 | 2.507172 | 3.190214 | 2.988239  |
| ENSMUSG Bbox1            | 0.753179 | 0.987471 | 0.126933 | 1.086726 | 1.115936 | 1.108004  |
| ENSMUSG Prima1           | 0.076191 | 0.166929 | 0.047101 | 0        | 0.104971 | 0.144644  |
| ENSMUSG Olfr791          | 0        | 0        | 0        | 0        | 0        | 0         |
| ENSMUSG Wfdc15a          | 0        | 0        | 0        | 0        | 0        | 0         |
| ENSMUSG Xrcc1            | 10.63244 | 10.0484  | 10.95873 | 8.945083 | 10.36353 | 9.914818  |
| Mus_musc Mus_musc        | 0.188031 | 0        | 0        | 0        | 0        | 0         |
| ENSMUSG Celsr3           | 0.053776 | 0.038398 | 0.100608 | 0.147307 | 0.095468 | 0.137292  |
| Mus_musc Mus_musc        | 0        | 0        | 0.065048 | 0        | 0        | 0.306127  |
| Mus_musc Mus_musc        | 0.037606 | 0        | 0        | 0.050349 | 0.06472  | 0.187704  |
| ENSMUSG Samhd1           | 87.14858 | 70.45374 | 122.7294 | 94.01949 | 75.75289 | 78.085671 |
| ENSMUSG Sla2             | 0.834023 | 0.44738  | 1.346548 | 1.480832 | 0.674056 | 0.872822  |
| ENSMUSG Rab5if           | 35.89711 | 31.37965 | 30.68709 | 34.52663 | 34.56602 | 36.151894 |
| ENSMUSG Ndr3             | 20.60628 | 19.46996 | 21.24289 | 16.15336 | 17.43152 | 15.884368 |
| ENSMUSG Dsn1             | 1.811877 | 2.149775 | 1.84256  | 2.205365 | 2.161635 | 2.925251  |
| ENSMUSG Tbl1xr1          | 7.934677 | 7.751886 | 7.846977 | 10.18571 | 7.497781 | 7.266983  |

|                   |          |          |          |          |          |           |
|-------------------|----------|----------|----------|----------|----------|-----------|
| ENSMUSG KI        | 0.070723 | 0.162299 | 0.131802 | 0.060589 | 0.050485 | 0.056645  |
| ENSMUSG Wdr91     | 11.58581 | 11.52345 | 12.06652 | 18.42028 | 16.59946 | 19.352592 |
| ENSMUSG Olfr108   | 0        | 0        | 0        | 0        | 0        | 0         |
| ENSMUSG Abhd11    | 13.47808 | 13.15982 | 12.58176 | 13.06335 | 11.21121 | 12.118839 |
| ENSMUSG Matn1     | 0        | 0        | 0        | 0        | 0        | 0         |
| ENSMUSG Necab1    | 0.04229  | 0.034737 | 0.061197 | 0.067423 | 0        | 0.016839  |
| ENSMUSG Adam22    | 2.114274 | 2.227187 | 1.744088 | 1.49033  | 1.315076 | 1.691394  |
| ENSMUSG Zfp637    | 18.60979 | 19.37559 | 17.55597 | 13.67622 | 12.34219 | 14.657489 |
| ENSMUSG Yes1      | 15.30923 | 16.30318 | 13.90751 | 10.79276 | 12.08084 | 11.072179 |
| Mus_musc Mus_musc | 0.086645 | 0        | 0        | 0.216605 | 0.107089 | 0.149145  |
| Mus_musc Mus_musc | 0        | 0        | 0        | 0        | 0.182574 | 0         |
| Mus_musc Mus_musc | 0.350118 | 0.241184 | 0.235435 | 0.833864 | 0.734019 | 0.942265  |
| Mus_musc Mus_musc | 3.440548 | 4.329283 | 1.395877 | 4.037701 | 2.099142 | 3.135377  |
| Mus_musc Mus_musc | 0.345986 | 0.615804 | 0.415802 | 0.406756 | 0.255763 | 0.701675  |
| ENSMUSG H2-DMb1   | 16.92533 | 17.44433 | 35.16056 | 42.57482 | 32.88672 | 40.859283 |
| ENSMUSG Abcg1     | 36.55292 | 33.62653 | 35.10514 | 31.62006 | 39.56559 | 38.576328 |
| ENSMUSG Gm5741    | 0.319883 | 0        | 0.392468 | 0.222295 | 0.135466 | 0.407681  |
| ENSMUSG Lrrc4b    | 0.529948 | 0.291256 | 0.239161 | 0.582484 | 0.440244 | 0.364524  |
| ENSMUSG Ngrn      | 25.62032 | 22.2708  | 21.91642 | 19.68946 | 22.05394 | 20.652914 |
| ENSMUSG BC053393  | 0        | 0        | 0.021828 | 0.046691 | 0        | 0         |
| ENSMUSG Olfr1020  | 0        | 0        | 0        | 0        | 0        | 0         |
| ENSMUSG Pla2g4f   | 1.594707 | 1.362611 | 1.382663 | 2.257658 | 1.970245 | 2.653795  |
| ENSMUSG Gm21833   | 0        | 0        | 0        | 0        | 0        | 0         |
| ENSMUSG 4933405O  | 0        | 0        | 0        | 0        | 0        | 0         |
| ENSMUSG Tmem19    | 9.546989 | 9.530649 | 9.398925 | 9.799531 | 11.56425 | 9.139449  |
| ENSMUSG Calb2     | 0        | 0        | 0        | 0.043656 | 0.078278 | 0         |
| ENSMUSG Xlr5c     | 0        | 0        | 0        | 0        | 0        | 0         |
| Mus_musc Mus_musc | 0        | 0.159655 | 0        | 0.196551 | 0        | 0         |
| Mus_musc Mus_musc | 0        | 0        | 0        | 0.09715  | 0        | 0.337863  |
| Mus_musc Mus_musc | 0.599617 | 0.768633 | 0.395195 | 0.167368 | 0.501552 | 0.161629  |
| Mus_musc Mus_musc | 0.699536 | 0.789513 | 0.896286 | 0.535508 | 0.553368 | 1.103247  |
| Mus_musc Mus_musc | 2.140383 | 1.979967 | 2.190333 | 2.467877 | 2.263866 | 2.260516  |
| Mus_musc Mus_musc | 0.059899 | 0.223129 | 0.105293 | 0.12774  | 0.188761 | 0.517099  |
| Mus_musc Mus_musc | 0        | 0.68817  | 0        | 0        | 0.373385 | 0         |
| Mus_musc Mus_musc | 0        | 0        | 0        | 0        | 0        | 0         |
| Mus_musc Mus_musc | 0.465474 | 0.442159 | 0.425956 | 0.335349 | 0.288498 | 0.532173  |
| Mus_musc Mus_musc | 0.555958 | 0.516245 | 0.4762   | 0.88452  | 0.208372 | 0.577358  |
| ENSMUSG Fam177a   | 7.289481 | 7.786248 | 6.503475 | 6.01777  | 6.602576 | 6.213859  |
| ENSMUSG Gm7138    | 0        | 0        | 0        | 0        | 0        | 0         |
| Mus_musc Mus_musc | 0.043134 | 0.125906 | 0.069617 | 0.073861 | 0.165664 | 0.260593  |
| Mus_musc Mus_musc | 0        | 0        | 0.063749 | 0.408446 | 0.38043  | 0.218475  |
| ENSMUSG Olfr339   | 0        | 0        | 0        | 0        | 0        | 0         |
| Mus_musc Mus_musc | 1.361591 | 1.921128 | 0.654934 | 0.912582 | 0.631922 | 0.831712  |
| ENSMUSG Olfr883   | 0        | 0        | 0        | 0        | 0        | 0         |
| ENSMUSG Gm21560   | 0        | 0        | 0        | 0        | 0        | 0         |
| ENSMUSG Gm21028   | 0.183445 | 0.154309 | 0.214261 | 0.369254 | 0.373385 | 0         |
| ENSMUSG Pnck      | 1.388344 | 1.525057 | 1.261167 | 1.448855 | 0.790274 | 1.027424  |
| ENSMUSG Idh3g     | 42.66046 | 45.39462 | 46.78567 | 46.78414 | 45.84623 | 46.366295 |
| ENSMUSG Fam98a    | 10.6102  | 12.34649 | 11.76392 | 10.87831 | 10.63918 | 10.615936 |
| ENSMUSG Bcap31    | 86.02172 | 88.19613 | 89.98589 | 80.93192 | 84.80566 | 84.965843 |
| ENSMUSG Ssr4      | 47.69618 | 48.44329 | 51.34956 | 132.3908 | 137.7121 | 119.11569 |
| ENSMUSG Pofut1    | 8.06242  | 7.110333 | 7.976594 | 6.844036 | 6.524028 | 6.86036   |
| ENSMUSG Stard5    | 8.611835 | 8.32019  | 10.84847 | 12.01641 | 12.65009 | 13.170726 |
| ENSMUSG Vmn1r151  | 0        | 0        | 0        | 0        | 0        | 0         |
| ENSMUSG Lrp3      | 2.308774 | 2.294444 | 2.457072 | 1.67181  | 1.704654 | 1.797011  |
| Mus_musc Mus_musc | 0        | 0        | 0        | 0        | 0        | 0         |
| ENSMUSG H2a1a     | 0        | 0        | 0        | 0        | 0        | 0         |
| ENSMUSG Gm28374   | 0        | 0        | 0        | 0.047404 | 0        | 0         |
| Mus_musc Mus_musc | 0.419772 | 0.245812 | 0.566825 | 0.375661 | 0.191278 | 0.598121  |
| Mus_musc Mus_musc | 0.13402  | 0.12229  | 0.059415 | 0.527797 | 0.275114 | 0.652399  |
| Mus_musc Mus_musc | 0        | 0        | 0        | 0        | 0        | 0         |
| Mus_musc Mus_musc | 0.0355   | 0        | 0        | 0.37879  | 0.514177 | 0.308463  |
| Mus_musc Mus_musc | 0.579009 | 0.471233 | 0.413487 | 0.27951  | 0.504898 | 0.588039  |
| ENSMUSG Gm9821    | 0.997946 | 1.236139 | 1.52978  | 1.453673 | 1.763761 | 1.671548  |

|                   |          |          |          |          |          |           |
|-------------------|----------|----------|----------|----------|----------|-----------|
| ENSMUSG Gm21834   | 0        | 0        | 0        | 0        | 0        | 0         |
| Mus_musc Mus_musc | 0.202229 | 0        | 0.186359 | 0        | 0        | 0         |
| Mus_musc Mus_musc | 0.303985 | 0.470533 | 0.304388 | 0.221737 | 0.110674 | 0         |
| Mus_musc Mus_musc | 0        | 0.307329 | 0.342108 | 0.494419 | 0.213214 | 0.140064  |
| Mus_musc Mus_musc | 0.34396  | 0        | 0        | 0        | 0        | 0         |
| Mus_musc Mus_musc | 0.676262 | 0.318358 | 0.605076 | 0.807517 | 0.527152 | 0.937686  |
| Mus_musc Mus_musc | 0.177585 | 0        | 0.15282  | 0        | 0        | 0         |
| ENSMUSG Zscan4b   | 0        | 0        | 0        | 0        | 0        | 0         |
| Mus_musc Mus_musc | 0.173049 | 0.114349 | 0        | 0.174016 | 0        | 0         |
| Mus_musc Mus_musc | 2.262242 | 2.515341 | 3.072821 | 2.266675 | 1.798734 | 2.463911  |
| ENSMUSG Kif2b     | 0        | 0        | 0        | 0        | 0        | 0         |
| ENSMUSG 1700018G  | 0        | 0        | 0.066524 | 0        | 0        | 0         |
| ENSMUSG Vmn1r206  | 0        | 0        | 0        | 0        | 0        | 0         |
| ENSMUSG Tgif2lx2  | 0        | 0        | 0        | 0        | 0        | 0         |
| ENSMUSG Krtap28-1 | 0        | 0        | 0.052958 | 0        | 0        | 0.057739  |
| ENSMUSG Skida1    | 1.770658 | 1.967634 | 1.461615 | 1.382705 | 1.342658 | 1.335481  |
| ENSMUSG ligp1     | 10.88286 | 7.771845 | 114.964  | 70.70373 | 10.6138  | 16.094444 |
| ENSMUSG Utp18     | 9.202998 | 7.134191 | 8.124    | 8.255911 | 6.948056 | 8.460407  |
| ENSMUSG Gbp11     | 0.406842 | 0.442044 | 1.69672  | 2.481145 | 0.876387 | 1.482246  |
| ENSMUSG Gm28539   | 0        | 0        | 0        | 0.025126 | 0        | 0         |
| ENSMUSG Scgb2b21  | 0        | 0        | 0        | 0        | 0        | 0         |
| ENSMUSG Gm8897    | 0        | 0        | 0        | 0.129744 | 0        | 0         |
| ENSMUSG Vmn1r117  | 0        | 0        | 0        | 0        | 0        | 0         |
| ENSMUSG Gm17535   | 0        | 0        | 0        | 0        | 0        | 0         |
| ENSMUSG Vmn1r79   | 0        | 0        | 0        | 0        | 0        | 0         |
| ENSMUSG Gm21836   | 0        | 0        | 0        | 0        | 0        | 0         |
| ENSMUSG 2210407C  | 0        | 0        | 0.040498 | 0.117401 | 0.244683 | 0         |
| ENSMUSG Kctd10    | 144.0768 | 142.0193 | 140.3546 | 98.07191 | 97.22769 | 101.52651 |
| ENSMUSG Tas2r108  | 0        | 0        | 0        | 0        | 0        | 0         |
| ENSMUSG Cfap61    | 2.606185 | 3.079607 | 1.478321 | 3.867884 | 3.865397 | 4.095071  |
| ENSMUSG Ddx1      | 13.2547  | 13.69813 | 12.9568  | 12.05065 | 11.76739 | 12.082553 |
| ENSMUSG Arhgap10  | 7.460751 | 7.072191 | 9.369697 | 7.098642 | 6.900017 | 9.284903  |
| ENSMUSG Slc13a2   | 0.195125 | 0.235622 | 0.196462 | 0.454592 | 0.632912 | 0.446949  |
| Mus_musc Mus_musc | 1.361577 | 1.815212 | 1.204906 | 1.076598 | 0.988952 | 0.709893  |
| ENSMUSG Rxb       | 17.76638 | 18.40759 | 19.2676  | 17.58481 | 17.92003 | 17.731611 |
| ENSMUSG Brinp3    | 0        | 0        | 0        | 0        | 0        | 0         |
| ENSMUSG Baat      | 0        | 0        | 0.013316 | 0        | 0        | 0         |
| ENSMUSG Cpeb3     | 3.117332 | 3.887848 | 3.108984 | 3.878612 | 4.373947 | 4.826608  |
| ENSMUSG 3110001I2 | 1.339738 | 1.909396 | 1.423951 | 1.368964 | 1.2184   | 2.13271   |
| ENSMUSG Zfp985    | 0.035537 | 0        | 0        | 0.015766 | 0.040557 | 0.020006  |
| ENSMUSG Aurkaip1  | 35.66371 | 36.7857  | 41.57254 | 39.22253 | 36.12849 | 37.373706 |
| ENSMUSG Ache      | 0.376269 | 0.344752 | 0.555117 | 0.538323 | 0.566027 | 0.582405  |
| ENSMUSG Gm14403   | 6.381125 | 9.204397 | 3.338063 | 4.722973 | 3.755824 | 5.500126  |
| ENSMUSG Srf       | 18.91047 | 15.99764 | 18.64721 | 14.52124 | 15.33078 | 17.977782 |
| ENSMUSG Klf15     | 104.6511 | 100.1393 | 100.6905 | 65.76853 | 73.06056 | 61.596797 |
| ENSMUSG Cyp3a41b  | 0        | 0        | 0        | 0        | 0        | 0         |
| Mus_musc Mus_musc | 0        | 0.118134 | 0.102723 | 0.174016 | 0        | 0         |
| ENSMUSG Zcchc18   | 0.400235 | 0.639218 | 0.482359 | 1.213019 | 1.334669 | 0.965337  |
| ENSMUSG Ankrd42   | 3.48433  | 3.307102 | 2.762216 | 4.234499 | 3.367458 | 4.5958    |
| ENSMUSG Ccdc188   | 0.006157 | 0.032553 | 0.038298 | 0.025695 | 0        | 0         |
| ENSMUSG Atg2b     | 7.1077   | 7.390725 | 6.873731 | 6.344735 | 6.992672 | 7.284547  |
| ENSMUSG Wrap53    | 4.534743 | 3.661239 | 4.690878 | 4.375834 | 4.213052 | 4.134929  |
| ENSMUSG Bdkrb1    | 0.547618 | 0.48839  | 0.610484 | 0.562236 | 1.033207 | 0.705762  |
| ENSMUSG Morf4I2   | 64.20415 | 67.0807  | 69.02656 | 68.56331 | 73.56701 | 70.058249 |
| ENSMUSG Alox12    | 2.126324 | 2.536806 | 3.216414 | 1.204075 | 1.241332 | 1.183497  |
| ENSMUSG Kir3dl1   | 0        | 0        | 0        | 0        | 0        | 0         |
| ENSMUSG Comt      | 49.19614 | 48.58058 | 47.25633 | 54.06468 | 58.80498 | 57.813977 |
| ENSMUSG Arvcf     | 8.015278 | 8.564026 | 10.37754 | 6.929095 | 6.865141 | 6.566019  |
| Mus_musc Mus_musc | 0.937996 | 0.582355 | 0.672293 | 0.670951 | 0.641382 | 1.168159  |
| Mus_musc Mus_musc | 0.296159 | 0.249361 | 0.246983 | 0.48677  | 0.632498 | 0.387401  |
| Mus_musc Mus_musc | 16.01203 | 10.77613 | 14.3906  | 15.74079 | 16.66075 | 14.861424 |
| Mus_musc Mus_musc | 0.182848 | 0.310939 | 0.692892 | 0.432642 | 0.671437 | 1.452256  |
| Mus_musc Mus_musc | 0.02096  | 0.011389 | 0.020508 | 0.023369 | 0.023519 | 0.019179  |
| Mus_musc Mus_musc | 0        | 0        | 0.06852  | 0.129761 | 0        | 0         |



|                   |          |          |          |          |          |           |
|-------------------|----------|----------|----------|----------|----------|-----------|
| Mus_musc Mus_musc | 0.876329 | 0.470354 | 1.198367 | 0.826361 | 0.851602 | 0         |
| Mus_musc Mus_musc | 0.139098 | 0.245408 | 1.470762 | 1.300299 | 1.7819   | 2.20846   |
| Mus_musc Mus_musc | 15.67269 | 11.3699  | 18.2784  | 19.68002 | 15.7327  | 20.46176  |
| ENSMUSG Plb1      | 1.419423 | 1.358312 | 1.583223 | 1.050837 | 0.665769 | 0.938034  |
| ENSMUSG Qk        | 86.90403 | 85.70908 | 79.69014 | 51.45238 | 53.43072 | 50.911246 |
| ENSMUSG Trim54    | 0.28939  | 1.410521 | 0.192733 | 0.506273 | 0.281341 | 0.159397  |
| ENSMUSG Lmnb2     | 5.462835 | 4.072142 | 5.694068 | 4.521222 | 5.047106 | 5.302059  |
| ENSMUSG Wisp3     | 0.160204 | 0.055569 | 0        | 0        | 0.325363 | 0.103234  |
| ENSMUSG Pcgk1     | 48.19251 | 52.69454 | 48.44406 | 62.6944  | 68.31219 | 71.700577 |
| ENSMUSG Gm21962   | 0        | 0        | 0        | 0        | 0        | 0         |
| ENSMUSG Dnajb6    | 51.29464 | 55.94025 | 49.42805 | 45.05316 | 43.43566 | 42.498425 |
| ENSMUSG Mpz       | 0.937215 | 1.860275 | 1.531926 | 2.44578  | 1.198162 | 1.243109  |
| ENSMUSG Olfr324   | 0        | 0        | 0        | 0        | 0        | 0         |
| ENSMUSG Mrpl40    | 13.27492 | 10.72091 | 11.15107 | 14.77669 | 11.51229 | 12.793825 |
| ENSMUSG Olfr1297  | 0        | 0        | 0        | 0        | 0        | 0         |
| ENSMUSG Speer4f2  | 0        | 0        | 0        | 0        | 0        | 0.033724  |
| ENSMUSG Foxa2     | 25.73553 | 19.05168 | 18.41794 | 17.99459 | 16.48951 | 17.841313 |
| ENSMUSG Mthfr     | 7.763602 | 7.597636 | 7.98655  | 7.117795 | 7.784338 | 7.754748  |
| ENSMUSG Agtrap    | 17.66184 | 16.59575 | 17.17182 | 19.54587 | 16.91083 | 18.702225 |
| ENSMUSG 1700003E1 | 2.893233 | 3.381736 | 2.488279 | 3.824232 | 3.642374 | 4.349741  |
| ENSMUSG Draxin    | 0.238294 | 0.279686 | 0.247459 | 0.220736 | 0.346242 | 0.125353  |
| ENSMUSG Kmt2e     | 25.29962 | 26.61219 | 21.15545 | 22.18567 | 22.22002 | 21.492006 |
| ENSMUSG Mad2l2    | 6.633727 | 6.730542 | 8.914384 | 6.339481 | 7.492139 | 6.110774  |
| ENSMUSG Nefm      | 0.067001 | 0.026289 | 0        | 0.014928 | 0.020186 | 0         |
| ENSMUSG Fbxo44    | 3.5413   | 3.994989 | 3.757314 | 5.332678 | 4.016432 | 5.629436  |
| ENSMUSG Adam7     | 0.368366 | 0.344827 | 0.335535 | 0.389216 | 0.204129 | 0.222415  |
| ENSMUSG Wdr54     | 1.152654 | 1.540708 | 1.112353 | 1.479252 | 1.098303 | 1.219708  |
| ENSMUSG Sema7a    | 65.68681 | 59.97461 | 76.5447  | 35.72632 | 48.05394 | 37.109549 |
| ENSMUSG Slc22a23  | 20.18149 | 20.79004 | 20.053   | 16.33108 | 16.4847  | 16.270093 |
| ENSMUSG Trpm4     | 9.997733 | 10.18506 | 10.0319  | 9.414611 | 9.589586 | 8.951815  |
| ENSMUSG Ovca2     | 5.596071 | 5.545772 | 4.871165 | 4.518761 | 4.473127 | 4.494926  |
| ENSMUSG Efcab10   | 1.213404 | 2.226364 | 0.532663 | 1.979854 | 2.373184 | 2.529893  |
| ENSMUSG Twistnb   | 4.780824 | 4.269193 | 4.334179 | 4.476118 | 4.327291 | 4.013897  |
| ENSMUSG Kif17     | 0.094849 | 0.015462 | 0.085911 | 0.090208 | 0.084831 | 0.061662  |
| ENSMUSG Hp1bp3    | 57.02257 | 55.41796 | 55.90753 | 46.18254 | 46.00262 | 45.757857 |
| ENSMUSG Nat1      | 0.041738 | 0.212216 | 0.104347 | 0.183398 | 0.234393 | 0.042252  |
| ENSMUSG Atxn7l1   | 19.40576 | 19.61015 | 22.21878 | 16.33165 | 17.38755 | 17.31102  |
| ENSMUSG Cpeb1     | 4.736409 | 3.995269 | 4.196022 | 3.028994 | 3.197502 | 3.333213  |
| ENSMUSG Cda       | 0.100906 | 0.189147 | 0.336475 | 0        | 0        | 0         |
| ENSMUSG Pink1     | 60.71661 | 58.73323 | 55.673   | 43.46157 | 41.5972  | 38.058328 |
| ENSMUSG Ddost     | 60.21506 | 51.35707 | 54.58072 | 59.40494 | 73.30977 | 70.230347 |
| ENSMUSG Pla2g2c   | 0.088779 | 0.039461 | 0.037118 | 0.089803 | 0.093933 | 0.242627  |
| ENSMUSG Rptor     | 8.66164  | 7.962209 | 8.285437 | 7.312248 | 7.321539 | 7.45738   |
| ENSMUSG Eif4a3    | 51.30346 | 48.0497  | 53.8121  | 46.68967 | 44.0029  | 46.62402  |
| ENSMUSG Vwa5b1    | 0        | 0        | 0        | 0        | 0        | 0         |
| Mus_musc Mus_musc | 0        | 0        | 0        | 0        | 0        | 0         |
| Mus_musc Mus_musc | 0        | 0        | 0        | 0.247605 | 0        | 0         |
| Mus_musc Mus_musc | 0        | 0        | 0        | 0        | 0.227069 | 0         |
| ENSMUSG Ly6f      | 0        | 0        | 0        | 0        | 0        | 0         |
| ENSMUSG Ly6g      | 0.388561 | 0.128728 | 0.529647 | 0.322046 | 0.363572 | 0.278328  |
| ENSMUSG Rhpn1     | 0.469224 | 0.165699 | 0.595053 | 0.591577 | 0.25209  | 0.464221  |
| ENSMUSG Ly6e      | 280.3755 | 224.7911 | 426.2461 | 182.9008 | 219.8541 | 258.76976 |
| ENSMUSG Ly6i      | 0.988466 | 4.899633 | 9.765248 | 2.359947 | 2.545813 | 9.119293  |
| ENSMUSG Ly6c2     | 60.8115  | 66.02661 | 97.82263 | 176.2653 | 135.9539 | 149.12725 |
| ENSMUSG Cyp11b2   | 0        | 0        | 0        | 0        | 0        | 0         |
| ENSMUSG Gm10439   | 0        | 0        | 0        | 0        | 0        | 0         |
| ENSMUSG Mrc2      | 11.91693 | 10.72748 | 12.71201 | 13.80951 | 13.41311 | 13.065703 |
| ENSMUSG Tlk2      | 13.97071 | 14.14335 | 12.59181 | 11.94892 | 14.02158 | 12.829998 |
| ENSMUSG Lig3      | 5.980684 | 5.2185   | 4.722761 | 5.391174 | 5.434414 | 5.447939  |
| ENSMUSG Rffl      | 6.915544 | 6.64704  | 6.989908 | 5.651444 | 6.241941 | 6.928069  |
| ENSMUSG Mettl2    | 6.325994 | 5.274493 | 5.938689 | 5.3067   | 5.089491 | 5.389693  |
| ENSMUSG Efcab3    | 0        | 0        | 0        | 0        | 0        | 0         |
| ENSMUSG Nle1      | 3.462604 | 2.85447  | 3.355558 | 3.164243 | 2.886769 | 2.564647  |
| ENSMUSG Cct6b     | 0.135079 | 0.118598 | 0.079005 | 0        | 0.119081 | 0.095686  |

|                   |          |          |          |          |          |           |
|-------------------|----------|----------|----------|----------|----------|-----------|
| Mus_musc Mus_musc | 0        | 0        | 0        | 0        | 0.186692 | 0         |
| Mus_musc Mus_musc | 0        | 0.308619 | 0        | 0        | 0        | 0         |
| ENSMUSG Vmn2r6    | 0        | 0        | 0        | 0        | 0        | 0         |
| Mus_musc Mus_musc | 0.228397 | 0.176952 | 0        | 0.138787 | 0.062907 | 0         |
| ENSMUSG Gm20883   | 0        | 0        | 0        | 0        | 0        | 0         |
| Mus_musc Mus_musc | 0        | 0        | 0        | 0        | 0.244817 | 0         |
| ENSMUSG Ninj1     | 19.41903 | 20.05745 | 20.36271 | 29.46254 | 26.86348 | 30.592927 |
| ENSMUSG Zc3h7a    | 17.80654 | 16.77587 | 21.50825 | 18.93987 | 17.02727 | 17.111453 |
| ENSMUSG Rflna     | 3.23573  | 2.69832  | 3.835639 | 2.016422 | 2.366991 | 1.625463  |
| ENSMUSG Card19    | 30.79958 | 26.12974 | 28.55831 | 28.01424 | 25.5414  | 26.792341 |
| ENSMUSG Mrps34    | 24.81456 | 23.53449 | 27.03573 | 28.77609 | 22.75535 | 21.468628 |
| ENSMUSG Prl3a1    | 0        | 0        | 0        | 0        | 0        | 0         |
| ENSMUSG A230050P: | 7.525715 | 7.167299 | 10.25686 | 7.31167  | 6.687486 | 6.041883  |
| ENSMUSG Man2a2    | 18.75344 | 18.29059 | 18.97457 | 26.04089 | 26.23185 | 26.549239 |
| ENSMUSG Ctu1      | 4.604757 | 4.218348 | 4.306063 | 3.524548 | 4.314743 | 5.100285  |
| ENSMUSG Pcgf6     | 1.969087 | 2.223694 | 2.148662 | 2.231106 | 2.299528 | 2.561532  |
| ENSMUSG Samt4     | 0        | 0        | 0        | 0        | 0        | 0         |
| ENSMUSG Nr0b1     | 0        | 0        | 0        | 0        | 0        | 0         |
| ENSMUSG 5430427O  | 0.479696 | 0.370893 | 0.724796 | 1.054341 | 0.927146 | 1.097856  |
| ENSMUSG Gk        | 2.869517 | 2.790456 | 3.195016 | 3.487689 | 3.585144 | 3.117704  |
| ENSMUSG Ulk3      | 4.376429 | 4.153663 | 5.303167 | 4.63014  | 4.20831  | 4.667963  |
| ENSMUSG Fbxo22    | 14.68589 | 16.61414 | 17.18127 | 16.10207 | 15.62781 | 16.640639 |
| ENSMUSG 1700017B  | 6.129955 | 5.585813 | 5.710376 | 10.18565 | 11.30353 | 11.510896 |
| ENSMUSG Psm4      | 49.52226 | 46.19189 | 56.04806 | 54.02732 | 51.60881 | 57.447313 |
| ENSMUSG Zc3hc1    | 7.50805  | 7.745275 | 8.01496  | 6.066978 | 6.29939  | 5.965758  |
| ENSMUSG Gipc2     | 26.1994  | 26.05013 | 24.81006 | 20.32135 | 16.48759 | 19.776478 |
| ENSMUSG Fam219b   | 9.548689 | 7.90903  | 8.807556 | 6.57516  | 6.462972 | 7.041299  |
| ENSMUSG Mpi       | 7.041634 | 7.571471 | 7.292537 | 6.947683 | 7.837359 | 8.008248  |
| ENSMUSG Ube2q2    | 11.69187 | 13.00383 | 11.62898 | 12.67166 | 12.46369 | 12.865574 |
| ENSMUSG Thrb      | 4.083833 | 4.470522 | 3.755541 | 3.506332 | 3.942123 | 3.629612  |
| ENSMUSG Vdac2     | 71.37691 | 70.76791 | 68.9045  | 72.15482 | 72.4205  | 76.437325 |
| ENSMUSG Samd8     | 10.71933 | 9.557276 | 8.643896 | 10.61864 | 11.07819 | 11.084102 |
| ENSMUSG Comtd1    | 2.251563 | 2.109813 | 1.885329 | 2.246762 | 3.03912  | 3.293499  |
| ENSMUSG Nkiras1   | 2.512216 | 3.281796 | 3.852379 | 3.458063 | 3.015631 | 2.919146  |
| ENSMUSG Nr1d2     | 41.46208 | 31.49256 | 27.6564  | 13.53464 | 15.99203 | 13.562338 |
| ENSMUSG Ube2e1    | 22.94231 | 25.25799 | 25.29219 | 26.94549 | 22.28156 | 20.511833 |
| ENSMUSG Tmem121   | 0.076335 | 0.029411 | 0.06912  | 0.235596 | 0.059779 | 0.136137  |
| ENSMUSG Clec4a1   | 2.751318 | 2.240852 | 5.278713 | 7.332803 | 7.423118 | 7.328732  |
| ENSMUSG Mterf2    | 1.741637 | 2.411446 | 2.194321 | 2.778995 | 2.570865 | 1.916525  |
| ENSMUSG Clec16a   | 8.165577 | 8.661122 | 8.956552 | 8.805293 | 8.48847  | 10.188308 |
| ENSMUSG Creb5     | 0.896957 | 1.083212 | 0.82222  | 1.268832 | 1.54457  | 1.746452  |
| ENSMUSG Hrh1      | 0.085514 | 0.135786 | 0.147406 | 0.28495  | 0.259405 | 0.366051  |
| ENSMUSG Cemip     | 0.081813 | 0.060543 | 0.052764 | 0.082322 | 0.041429 | 0.088454  |
| ENSMUSG Ccdc85a   | 31.95245 | 31.63907 | 30.81959 | 17.55192 | 18.85244 | 14.272944 |
| ENSMUSG Arhgef17  | 18.03797 | 18.50629 | 17.7961  | 12.81434 | 13.32491 | 12.912783 |
| ENSMUSG Cyb5r4    | 12.45808 | 13.49891 | 12.9777  | 13.0704  | 13.22857 | 13.818322 |
| ENSMUSG Smap2     | 19.03517 | 15.50247 | 15.55528 | 26.74995 | 29.17071 | 27.569365 |
| ENSMUSG Cenpj     | 3.506102 | 2.8254   | 4.255315 | 3.571784 | 3.382508 | 2.695024  |
| ENSMUSG Fbxo39    | 0.188913 | 0.157471 | 0.087435 | 0.063168 | 0.031808 | 0.074731  |
| ENSMUSG C530008M  | 1.788519 | 1.340945 | 1.52581  | 1.058194 | 1.368674 | 1.235813  |
| ENSMUSG Ampd1     | 0.038409 | 0.068744 | 0        | 0.014815 | 0.021762 | 0         |
| ENSMUSG Serbp1    | 79.77359 | 78.26859 | 59.92752 | 69.18329 | 89.21996 | 97.950791 |
| ENSMUSG Olfr389   | 0        | 0        | 0        | 0        | 0        | 0         |
| ENSMUSG Olfr401   | 0        | 0        | 0        | 0        | 0        | 0         |
| ENSMUSG Tmem258   | 25.05303 | 25.01299 | 27.34191 | 32.77506 | 33.46122 | 36.815031 |
| ENSMUSG Nkx6-3    | 0.037808 | 0        | 0        | 0        | 0        | 0         |
| ENSMUSG Adipoq    | 1.140559 | 4.198717 | 0        | 2.05331  | 0.736221 | 2.093764  |
| ENSMUSG Fetub     | 1.432165 | 0.98602  | 1.046674 | 1.740628 | 2.722395 | 2.249732  |
| ENSMUSG Hrg       | 0        | 0        | 0        | 0        | 0        | 0         |
| ENSMUSG Samsn1    | 4.657708 | 3.731182 | 6.40134  | 9.529088 | 9.55361  | 8.776231  |
| ENSMUSG Kng1      | 0        | 0        | 0        | 0.111509 | 0.0793   | 0.099186  |
| ENSMUSG Canx      | 78.12971 | 82.59368 | 89.97667 | 84.66801 | 90.30155 | 86.485774 |
| ENSMUSG Gpcpd1    | 16.92511 | 15.15475 | 15.32262 | 14.03592 | 12.78798 | 13.366469 |
| ENSMUSG Rasgrp1   | 2.528931 | 1.726558 | 2.839232 | 3.986538 | 3.124403 | 3.9654    |

|                   |          |          |          |          |          |           |
|-------------------|----------|----------|----------|----------|----------|-----------|
| ENSMUSG Fsip1     | 1.127633 | 1.175197 | 0.759689 | 1.499156 | 1.567872 | 1.074898  |
| ENSMUSG Pcna      | 48.09108 | 48.07516 | 54.96835 | 48.28045 | 53.98441 | 56.886856 |
| ENSMUSG Pcdhb18   | 0.590801 | 0.701264 | 0.614584 | 0.435368 | 0.51708  | 0.431546  |
| ENSMUSG Tmem230   | 13.16343 | 14.65346 | 12.88221 | 12.94595 | 13.36655 | 12.939561 |
| ENSMUSG Pou4f1    | 0.039764 | 0.018573 | 0.055831 | 0.046274 | 0.072787 | 0.039365  |
| ENSMUSG Fam98b    | 11.91984 | 11.98057 | 10.58207 | 12.36389 | 11.9293  | 11.96112  |
| ENSMUSG Tmem238   | 3.9436   | 1.7442   | 1.684213 | 1.643598 | 1.882538 | 2.078826  |
| ENSMUSG Rpl28     | 184.7544 | 184.0756 | 201.9317 | 225.5166 | 216.3815 | 230.77227 |
| ENSMUSG Sbk2      | 0.198964 | 0.546398 | 0.649859 | 1.583297 | 1.771279 | 2.164383  |
| ENSMUSG Depdc5    | 7.070224 | 6.550462 | 5.664993 | 6.019907 | 5.695438 | 6.228744  |
| ENSMUSG U2af2     | 54.63058 | 56.47446 | 60.11712 | 55.10162 | 52.82999 | 51.88303  |
| ENSMUSG Taar9     | 0        | 0        | 0        | 0        | 0        | 0         |
| ENSMUSG Vgf       | 0        | 0        | 0        | 0        | 0        | 0.07357   |
| ENSMUSG Vcam1     | 12.69425 | 10.84575 | 16.21069 | 18.45268 | 18.83522 | 17.034396 |
| ENSMUSG Extl2     | 4.310135 | 3.772738 | 4.058669 | 3.985733 | 3.813029 | 4.125827  |
| ENSMUSG Lrrc39    | 0.290419 | 0.492966 | 0.180276 | 0.304804 | 0.284549 | 0.269328  |
| ENSMUSG Col11a1   | 0        | 0        | 0        | 0        | 0        | 0         |
| ENSMUSG Neurog2   | 0        | 0        | 0        | 0        | 0        | 0         |
| ENSMUSG Olfm3     | 0        | 0        | 0        | 0        | 0        | 0         |
| ENSMUSG Larp7     | 6.860798 | 6.569566 | 6.696634 | 6.885296 | 6.439653 | 5.917363  |
| ENSMUSG Smtnl1    | 0        | 0        | 0        | 0        | 0        | 0         |
| ENSMUSG Mmp2      | 19.14186 | 17.82094 | 19.60447 | 32.40448 | 31.83602 | 33.995683 |
| ENSMUSG St3gal2   | 19.46146 | 17.66497 | 17.32151 | 12.38651 | 12.77563 | 12.258531 |
| ENSMUSG Gnao1     | 17.18699 | 16.83653 | 17.88224 | 9.330676 | 9.96289  | 9.211768  |
| ENSMUSG Ttc25     | 2.318074 | 2.990921 | 1.683274 | 3.764763 | 5.323152 | 4.256644  |
| ENSMUSG Cnp       | 17.9584  | 16.82003 | 17.84965 | 25.85613 | 23.91884 | 25.911575 |
| ENSMUSG Krt6b     | 0        | 0        | 0        | 0        | 0        | 0.024723  |
| ENSMUSG Krt18     | 61.65102 | 57.80675 | 43.21462 | 47.84621 | 48.50383 | 55.154942 |
| ENSMUSG Olfr263   | 0        | 0        | 0        | 0        | 0        | 0         |
| ENSMUSG Soat2     | 0.169467 | 0.140612 | 0.34055  | 0.362171 | 0.137398 | 0.350688  |
| ENSMUSG Csad      | 17.95508 | 20.48187 | 15.64075 | 15.41346 | 16.41547 | 15.632411 |
| ENSMUSG Amhr2     | 2.06118  | 1.461798 | 2.564486 | 1.467285 | 1.510108 | 1.795664  |
| ENSMUSG Igfbp6    | 235.3447 | 243.5192 | 183.9851 | 126.0462 | 120.1262 | 130.65985 |
| ENSMUSG Prr13     | 57.81418 | 58.83471 | 66.10385 | 74.95303 | 77.27956 | 84.319852 |
| ENSMUSG Pgap1     | 1.840631 | 1.716483 | 1.647459 | 1.881234 | 1.650286 | 1.959496  |
| ENSMUSG Hspe1     | 28.35925 | 40.89206 | 38.1223  | 39.38599 | 37.94868 | 44.236221 |
| ENSMUSG G0s2      | 30.36546 | 40.87336 | 44.66063 | 20.08878 | 19.77653 | 21.147375 |
| ENSMUSG Ppp2cb    | 57.13596 | 57.48283 | 60.40644 | 44.73957 | 42.01061 | 43.088169 |
| ENSMUSG Cdsn      | 0.223738 | 0.037172 | 0.19777  | 0.126879 | 0.13353  | 0.18383   |
| Mus_musc Mus_musc | 0        | 0        | 0        | 0        | 0        | 0.04547   |
| Mus_musc Mus_musc | 0.119282 | 0        | 0        | 0.352383 | 0.641755 | 0         |
| Mus_musc Mus_musc | 6.082824 | 5.639679 | 5.461276 | 3.412126 | 3.97268  | 3.480659  |
| Mus_musc Mus_musc | 1.106355 | 0.852327 | 1.559593 | 1.084163 | 0.829687 | 1.141312  |
| Mus_musc Mus_musc | 0        | 0        | 0        | 0.218357 | 0        | 0.387854  |
| Mus_musc Mus_musc | 0        | 0.197385 | 0        | 0        | 0        | 0         |
| Mus_musc Mus_musc | 0.34897  | 0.159197 | 0.382457 | 0.421227 | 0        | 0.108613  |
| ENSMUSG Olfr399   | 0        | 0        | 0        | 0        | 0        | 0         |
| ENSMUSG Olfr62    | 0        | 0        | 0        | 0        | 0        | 0         |
| ENSMUSG Ccl8      | 1.201081 | 1.972199 | 1.226853 | 277.9625 | 293.1616 | 299.46274 |
| ENSMUSG 4930558C; | 0        | 0        | 0        | 0        | 0        | 0.061983  |
| Mus_musc Mus_musc | 3.288666 | 2.71341  | 3.747498 | 3.195182 | 0.970829 | 2.620787  |
| ENSMUSG Mtmr11    | 2.069395 | 1.872902 | 2.188634 | 2.07886  | 2.647429 | 2.272824  |
| Mus_musc Mus_musc | 0        | 0        | 0        | 0        | 1.477528 | 1.047774  |
| Mus_musc Mus_musc | 0        | 0        | 0.288438 | 0        | 0.10546  | 0         |
| ENSMUSG Clec14a   | 138.9094 | 124.9312 | 123.8836 | 82.42641 | 95.23193 | 76.164742 |
| ENSMUSG Ifit2     | 9.789542 | 9.825246 | 11.64117 | 6.249495 | 5.79486  | 5.315277  |
| Mus_musc Mus_musc | 2.3349   | 1.943407 | 1.053136 | 2.438793 | 5.793402 | 1.328851  |
| Mus_musc Mus_musc | 0        | 0        | 0        | 0.174016 | 0        | 0         |
| ENSMUSG Olfr266   | 0        | 0        | 0        | 0        | 0        | 0         |
| Mus_musc Mus_musc | 0.515246 | 0        | 0.245772 | 0.517194 | 0.350168 | 0.20274   |
| Mus_musc Mus_musc | 0        | 0        | 0.341607 | 0        | 0.226479 | 0         |
| Mus_musc Mus_musc | 8.778347 | 7.738002 | 7.163434 | 5.637495 | 6.186362 | 6.188154  |
| Mus_musc Mus_musc | 4.50526  | 3.64857  | 3.038914 | 4.755656 | 5.032723 | 4.390351  |
| ENSMUSG Tas2r126  | 0        | 0        | 0.100998 | 0        | 0        | 0         |

|                   |          |          |          |          |          |           |
|-------------------|----------|----------|----------|----------|----------|-----------|
| ENSMUSG Wnk4      | 2.442583 | 2.299234 | 1.310527 | 1.688003 | 2.128658 | 2.194745  |
| ENSMUSG Olfr775   | 0        | 0        | 0        | 0        | 0        | 0         |
| ENSMUSG Sprr2a1   | 0        | 0.258364 | 0        | 4.026698 | 3.614404 | 4.435444  |
| ENSMUSG Thop1     | 6.312672 | 6.079414 | 6.615384 | 5.553739 | 5.892015 | 6.262755  |
| ENSMUSG Mrpl52    | 39.56912 | 36.20979 | 38.08362 | 47.92404 | 38.7358  | 42.322092 |
| ENSMUSG Gm11595   | 0        | 0        | 0        | 0        | 0        | 0         |
| ENSMUSG Olfr123   | 0        | 0        | 0        | 0        | 0        | 0         |
| ENSMUSG Lrrc3b    | 0.458544 | 0.538917 | 0.145663 | 0.269594 | 0.101525 | 0.170609  |
| ENSMUSG Dpy19l4   | 8.895294 | 9.194468 | 7.22087  | 7.472455 | 8.543386 | 7.207281  |
| ENSMUSG Olfr835   | 0        | 0        | 0        | 0        | 0        | 0         |
| ENSMUSG Faim      | 8.17966  | 7.947003 | 9.347787 | 6.843954 | 8.53719  | 8.922327  |
| ENSMUSG Pik3cb    | 10.65526 | 10.72552 | 9.821913 | 8.880561 | 8.234192 | 9.158504  |
| ENSMUSG Dbr1      | 6.969748 | 6.69734  | 7.47472  | 6.154521 | 5.195175 | 4.997774  |
| ENSMUSG Armc8     | 8.480204 | 7.256922 | 7.701063 | 6.502618 | 5.917528 | 6.645833  |
| ENSMUSG Rhox6     | 0        | 0        | 0        | 0        | 0        | 0         |
| ENSMUSG 5430419D  | 0.0802   | 0.072612 | 0.04955  | 0.122721 | 0.114459 | 0.050203  |
| ENSMUSG Htra1     | 14.92304 | 15.28304 | 14.12562 | 10.84037 | 10.2829  | 11.912004 |
| Mus_musc Mus_musc | 1.663444 | 1.324029 | 1.722264 | 0.453977 | 1.66549  | 0.944118  |
| Mus_musc Mus_musc | 0.189733 | 0.321805 | 0.261063 | 0        | 0.307215 | 0.141854  |
| Mus_musc Mus_musc | 0.157948 | 0.024927 | 0.02729  | 0        | 0        | 0         |
| Mus_musc Mus_musc | 0.14062  | 0        | 0        | 0.095235 | 0        | 0.184018  |
| ENSMUSG Qpct      | 1.649727 | 1.166067 | 1.262878 | 1.624587 | 2.759844 | 1.789979  |
| ENSMUSG Man2a1    | 30.1868  | 26.65696 | 28.3819  | 29.70839 | 30.82987 | 27.665901 |
| ENSMUSG Cyp1b1    | 1.292061 | 1.532529 | 0.79503  | 2.131103 | 2.139171 | 1.779333  |
| ENSMUSG Cebpz     | 11.59608 | 10.61122 | 10.46669 | 9.523267 | 9.464864 | 8.978156  |
| ENSMUSG Ndufaf7   | 7.410504 | 6.205937 | 5.597937 | 7.47134  | 5.8237   | 5.420686  |
| ENSMUSG Pja2      | 33.67512 | 34.2584  | 32.63622 | 23.90718 | 25.55283 | 24.055248 |
| ENSMUSG Gm6890    | 0        | 0        | 0        | 0        | 0        | 0         |
| ENSMUSG Gm5936    | 0.121603 | 0.148935 | 0.051635 | 0.025582 | 0.014779 | 0         |
| ENSMUSG Gm6880    | 0        | 0        | 0        | 0        | 0        | 0         |
| ENSMUSG Gm5640    | 0.097411 | 0.136753 | 0.022423 | 0.043367 | 0.040469 | 0.019217  |
| ENSMUSG Ccdc114   | 3.756233 | 3.22642  | 2.191148 | 3.726127 | 3.311167 | 3.199431  |
| ENSMUSG Scamp2    | 24.19876 | 21.4435  | 22.07905 | 29.17761 | 28.90912 | 29.924111 |
| ENSMUSG Arntl2    | 0.165306 | 0.193216 | 0.114435 | 0.177231 | 0.088652 | 0.409205  |
| Mus_musc Mus_musc | 0.303383 | 0.24709  | 0        | 0        | 0.277801 | 0         |
| Mus_musc Mus_musc | 0        | 0        | 0        | 0.499654 | 0        | 0         |
| ENSMUSG Ankrd6    | 0.336915 | 0.545985 | 0.329034 | 0.576449 | 0.962659 | 0.605852  |
| ENSMUSG Fmo1      | 181.903  | 176.5456 | 151.6554 | 101.9892 | 118.9015 | 98.88695  |
| Mus_musc Mus_musc | 1.045632 | 0.790789 | 0.722622 | 0.909933 | 1.126121 | 0.94393   |
| ENSMUSG Minos1    | 17.24177 | 17.59874 | 17.69452 | 17.58357 | 17.5593  | 17.697271 |
| ENSMUSG Obox6     | 0        | 0        | 0        | 0        | 0        | 0         |
| ENSMUSG Kcmf1     | 21.70136 | 20.86843 | 22.89492 | 18.14843 | 20.5592  | 20.339389 |
| ENSMUSG Me2       | 11.23459 | 10.95178 | 11.61181 | 13.1737  | 13.45906 | 13.850244 |
| ENSMUSG Ngfr      | 0.212859 | 0.195909 | 0.211101 | 0.401257 | 0.305447 | 0.422206  |
| ENSMUSG Olfr1008  | 0        | 0        | 0        | 0        | 0        | 0         |
| ENSMUSG Slc14a2   | 0        | 0        | 0.054376 | 0.011589 | 0        | 0.093379  |
| ENSMUSG Galr1     | 0        | 0        | 0        | 0        | 0        | 0         |
| ENSMUSG Fer       | 8.072709 | 8.073419 | 7.801346 | 5.819598 | 6.268035 | 7.501446  |
| ENSMUSG Wnt9a     | 4.112555 | 3.878148 | 3.774129 | 2.550559 | 2.269173 | 2.282011  |
| ENSMUSG Olfr1385  | 0        | 0        | 0        | 0.004759 | 0        | 0         |
| ENSMUSG Lrrc66    | 0        | 0        | 0.047437 | 0.110515 | 0.214501 | 0.090653  |
| ENSMUSG H2-M9     | 0        | 0        | 0        | 0        | 0        | 0         |
| ENSMUSG Ddx27     | 12.81677 | 12.00962 | 12.30429 | 10.27037 | 9.960535 | 12.699087 |
| ENSMUSG Cd7       | 2.871202 | 2.729168 | 5.707961 | 2.918581 | 2.258179 | 3.556933  |
| ENSMUSG Csp1      | 5.63005  | 6.278889 | 5.507504 | 6.353818 | 6.235626 | 5.847334  |
| ENSMUSG Fadd      | 4.263009 | 3.491746 | 3.828917 | 3.687421 | 3.311433 | 3.73219   |
| ENSMUSG Ano1      | 26.76235 | 27.66261 | 20.94645 | 20.90188 | 19.57416 | 24.228379 |
| Mus_musc Mus_musc | 0        | 0        | 0.132674 | 0        | 0.277653 | 0.094133  |
| Mus_musc Mus_musc | 0.238369 | 0.29454  | 0        | 0.419268 | 0.218742 | 0.232168  |
| ENSMUSG Fgf3      | 0        | 0        | 0        | 0        | 0        | 0         |
| Mus_musc Mus_musc | 0        | 0        | 0        | 0        | 0        | 0         |
| Mus_musc Mus_musc | 1.947422 | 1.801592 | 1.475724 | 1.422358 | 1.210986 | 1.283074  |
| ENSMUSG Frem1     | 1.546652 | 1.408863 | 1.08735  | 1.251221 | 1.204508 | 1.395288  |
| ENSMUSG Alg9      | 7.279711 | 5.837622 | 6.691725 | 6.493954 | 6.62069  | 6.941171  |

|                   |          |          |          |          |          |           |
|-------------------|----------|----------|----------|----------|----------|-----------|
| ENSMUSG Surf2     | 10.65093 | 9.866275 | 11.52181 | 7.955911 | 8.836833 | 8.368419  |
| Mus_musc Mus_musc | 0        | 0        | 0        | 0.408611 | 0        | 0         |
| ENSMUSG Fam136a   | 8.967227 | 9.259575 | 9.291299 | 9.796796 | 10.67094 | 10.498025 |
| ENSMUSG Cldn34b2  | 0        | 0        | 0        | 0        | 0        | 0.072854  |
| ENSMUSG Nat8f3    | 4.194871 | 5.631917 | 5.186131 | 3.902026 | 3.417615 | 2.928478  |
| ENSMUSG Rps21     | 158.5174 | 164.6693 | 197.6497 | 194.2391 | 163.5742 | 174.87442 |
| ENSMUSG Scly      | 9.81033  | 10.01194 | 11.58792 | 13.1824  | 11.51445 | 12.788713 |
| Mus_musc Mus_musc | 0        | 0        | 0        | 0.252423 | 0.200855 | 0.253627  |
| ENSMUSG Bmp6      | 65.75834 | 59.28885 | 57.4484  | 34.68032 | 33.57379 | 32.631149 |
| ENSMUSG Mup3      | 0        | 0        | 0        | 0        | 0        | 0         |
| Mus_musc Mus_musc | 0.125354 | 0        | 0.095464 | 0.145013 | 0.405144 | 0.263304  |
| ENSMUSG 4833427G  | 4.248969 | 5.212893 | 3.072624 | 4.665708 | 5.362752 | 6.087611  |
| ENSMUSG Slc31a1   | 31.18083 | 32.19113 | 27.496   | 27.56121 | 27.935   | 26.045955 |
| ENSMUSG Fkbp15    | 18.82972 | 19.20091 | 17.86211 | 18.22629 | 18.40199 | 18.076908 |
| Mus_musc Mus_musc | 0        | 0        | 0.168936 | 0        | 0        | 0         |
| ENSMUSG Mup21     | 0        | 0        | 0        | 0        | 0        | 0         |
| ENSMUSG Dph6      | 5.970221 | 5.154087 | 5.131178 | 4.516276 | 4.048727 | 4.371437  |
| ENSMUSG Trim12c   | 15.12712 | 15.83056 | 19.99733 | 16.99243 | 14.55742 | 14.070474 |
| ENSMUSG Sqstm1    | 188.8186 | 187.7284 | 186.8629 | 146.0297 | 153.8173 | 154.50601 |
| ENSMUSG Olfr1301  | 0        | 0        | 0        | 0        | 0        | 0         |
| ENSMUSG Prn       | 0.029729 | 0.575736 | 0.224668 | 0        | 0        | 0         |
| ENSMUSG A630089N  | 1.12418  | 0.649356 | 0.612206 | 1.239903 | 0.841869 | 1.537562  |
| ENSMUSG Robo2     | 6.220386 | 5.593111 | 6.244105 | 4.58459  | 3.621652 | 4.284183  |
| ENSMUSG Nav2      | 10.80443 | 10.48032 | 8.288612 | 8.230219 | 7.578456 | 8.440721  |
| ENSMUSG Pld5      | 0        | 0.019305 | 0        | 0        | 0        | 0.032087  |
| ENSMUSG Lrrn1     | 0.072672 | 0.066395 | 0        | 0.042328 | 0.014986 | 0.063619  |
| ENSMUSG Cisd3     | 3.761865 | 3.487348 | 4.375817 | 5.301472 | 2.614392 | 4.953539  |
| Mus_musc Mus_musc | 0        | 0        | 0        | 0.148861 | 0.311306 | 0         |
| Mus_musc Mus_musc | 0.440722 | 0.448994 | 0.47002  | 0.566245 | 0.284675 | 0.08323   |
| Mus_musc Mus_musc | 3.170001 | 2.543219 | 3.260429 | 2.261812 | 2.993201 | 1.807161  |
| Mus_musc Mus_musc | 0.250659 | 0.184902 | 0.176284 | 0.702251 | 0.298165 | 0.514395  |
| Mus_musc Mus_musc | 0        | 0        | 0        | 0        | 0        | 0         |
| Mus_musc Mus_musc | 4.850452 | 5.689526 | 5.543359 | 6.05298  | 6.068071 | 1.035504  |
| Mus_musc Mus_musc | 4.078306 | 4.915271 | 3.91889  | 2.511627 | 3.832905 | 3.132106  |
| Mus_musc Mus_musc | 0.087483 | 0        | 0.807423 | 0.665572 | 0.169207 | 0         |
| Mus_musc Mus_musc | 0.552621 | 1.347962 | 1.247362 | 1.446556 | 1.484744 | 1.368009  |
| Mus_musc Mus_musc | 0.167755 | 0.569793 | 0.444349 | 1.129786 | 0.501657 | 0.554036  |
| ENSMUSG Gm5862    | 0        | 0        | 0        | 0        | 0        | 0         |
| ENSMUSG Tmem265   | 0.06684  | 0.041185 | 0.03616  | 0.020126 | 0.033429 | 0.054079  |
| ENSMUSG Aldh7a1   | 16.60226 | 16.71679 | 14.69961 | 11.40325 | 12.01696 | 12.537171 |
| ENSMUSG Mrgpra3   | 0        | 0        | 0        | 0        | 0        | 0         |
| ENSMUSG Plxnb1    | 14.46035 | 14.84928 | 13.44439 | 10.73296 | 10.69195 | 11.578781 |
| ENSMUSG Gper1     | 0.995447 | 1.344382 | 0.975395 | 0.659231 | 0.565522 | 0.63859   |
| ENSMUSG Dennd4a   | 6.125569 | 6.100038 | 6.289466 | 6.369671 | 6.035996 | 6.534387  |
| ENSMUSG Clgn      | 0        | 0.027208 | 0.022903 | 0.138517 | 0.087796 | 0.101938  |
| ENSMUSG Naca      | 184.7442 | 185.3485 | 181.3861 | 192.9099 | 194.2001 | 201.21403 |
| ENSMUSG Ddhd2     | 7.826401 | 8.237686 | 6.650374 | 7.581237 | 6.5112   | 6.775003  |
| ENSMUSG Rag1      | 0        | 0        | 0        | 0        | 0        | 0         |
| ENSMUSG Gm49321   | 0        | 0        | 0        | 0        | 0        | 0         |
| ENSMUSG Stk16     | 17.81376 | 17.71388 | 20.6227  | 21.04329 | 17.71734 | 17.496757 |
| ENSMUSG Olfr1215  | 0        | 0        | 0        | 0        | 0        | 0         |
| ENSMUSG H2a2a     | 0        | 0        | 0        | 0        | 0        | 0         |
| Mus_musc Mus_musc | 0.59756  | 0.618056 | 0.688447 | 0.594325 | 1.17552  | 0.76612   |
| ENSMUSG Mpst      | 24.51672 | 24.01271 | 22.09271 | 23.29927 | 22.99336 | 24.875481 |
| ENSMUSG Rdh16f1   | 0.142095 | 0.087698 | 0.083674 | 0.106145 | 0.258959 | 0.07053   |
| Mus_musc Mus_musc | 0.090728 | 0        | 0        | 0.492843 | 0        | 0         |
| ENSMUSG Olfr1080  | 0        | 0        | 0        | 0        | 0        | 0         |
| ENSMUSG Apol7e    | 0.02488  | 0.074149 | 0.1105   | 0.246365 | 0.134712 | 0.27532   |
| ENSMUSG Vmn2r110  | 0        | 0        | 0        | 0        | 0        | 0         |
| ENSMUSG Cd200r3   | 0        | 0.14137  | 0.252285 | 0.418289 | 0.303413 | 0.264607  |
| ENSMUSG Rmnd5a    | 25.07934 | 27.33507 | 22.71191 | 23.33705 | 25.59425 | 22.036265 |
| ENSMUSG Krtap6-5  | 0        | 0        | 0        | 0        | 0        | 0         |
| ENSMUSG Mov10     | 5.574834 | 5.22599  | 6.998087 | 6.573064 | 4.374967 | 5.42731   |
| ENSMUSG Ppm1j     | 1.064983 | 0.775761 | 1.305746 | 1.643042 | 1.078335 | 0.8656    |

|                    |          |          |          |          |          |           |
|--------------------|----------|----------|----------|----------|----------|-----------|
| ENSMUSG Ncf4       | 8.199592 | 8.417726 | 14.48738 | 25.56279 | 24.57501 | 28.788341 |
| ENSMUSG Speer4e    | 0        | 0        | 0        | 0.073276 | 0.082224 | 0         |
| ENSMUSG Sco2       | 1.394686 | 1.389799 | 0.83201  | 1.391464 | 1.113238 | 1.896417  |
| ENSMUSG Scaf1      | 25.43882 | 23.06078 | 25.80212 | 20.84252 | 21.32675 | 21.661141 |
| ENSMUSG Pmepa1     | 6.996557 | 7.561223 | 9.415483 | 11.9863  | 9.610665 | 12.337342 |
| ENSMUSG Hfe2       | 0.055633 | 0.885604 | 0.151716 | 0.294746 | 0.270557 | 0.440939  |
| ENSMUSG Foxf2      | 13.52792 | 11.4595  | 15.43739 | 8.564901 | 9.659572 | 7.181159  |
| ENSMUSG H2a1n      | 0        | 0        | 0        | 0        | 0        | 0         |
| ENSMUSG Sf3b5      | 10.08825 | 10.44068 | 11.24299 | 10.79235 | 10.11619 | 11.20611  |
| ENSMUSG AW011738   | 5.806793 | 3.978557 | 5.517667 | 4.376299 | 3.235597 | 3.723791  |
| ENSMUSG Gm10190    | 0        | 0        | 0        | 0        | 0        | 0         |
| ENSMUSG Gm10188    | 0        | 0        | 0        | 0        | 0        | 0         |
| ENSMUSG Olfr381    | 0        | 0        | 0        | 0        | 0        | 0         |
| ENSMUSG Olfr380    | 0        | 0        | 0        | 0        | 0        | 0         |
| ENSMUSG Fars2      | 6.894827 | 7.69741  | 7.05874  | 8.267798 | 7.806537 | 8.518997  |
| ENSMUSG Smim1011   | 39.80375 | 38.12518 | 40.85197 | 31.04461 | 29.73325 | 29.2739   |
| ENSMUSG Olfr31     | 0        | 0        | 0.017688 | 0        | 0        | 0         |
| ENSMUSG Naglu      | 8.160013 | 6.775486 | 7.707881 | 14.02045 | 15.17481 | 17.06584  |
| ENSMUSG Tcirg1     | 19.69293 | 18.46001 | 25.29675 | 39.23467 | 33.81405 | 38.819001 |
| ENSMUSG Arrb2      | 17.91929 | 18.04661 | 24.61538 | 25.50413 | 24.07247 | 24.983796 |
| ENSMUSG Coasy      | 10.58041 | 10.20638 | 9.421861 | 11.52305 | 10.2215  | 10.790668 |
| ENSMUSG Fah        | 9.776626 | 10.2971  | 11.11094 | 9.939451 | 9.763362 | 9.831653  |
| ENSMUSG Sh3gl3     | 0.213034 | 0.054716 | 0.207811 | 0.201434 | 0.080067 | 0.158912  |
| ENSMUSG Dvl2       | 7.411991 | 6.761932 | 7.304353 | 5.433953 | 6.091746 | 6.338795  |
| ENSMUSG Nr1d1      | 30.60236 | 17.24144 | 19.50301 | 7.564427 | 7.273116 | 6.758525  |
| ENSMUSG Aqp4       | 2.250773 | 2.707466 | 1.221493 | 2.141283 | 2.126568 | 2.11226   |
| ENSMUSG Cacnb1     | 2.484694 | 2.714218 | 2.865434 | 2.461923 | 3.049002 | 2.334954  |
| ENSMUSG Fbxl20     | 9.692344 | 10.21953 | 9.581014 | 8.818112 | 8.769975 | 8.630029  |
| ENSMUSG Asgr1      | 1.174849 | 0.714901 | 0.600963 | 0.183196 | 0.115041 | 0.103499  |
| ENSMUSG Dlg4       | 6.448117 | 7.291684 | 8.284749 | 6.814977 | 5.705191 | 5.134987  |
| ENSMUSG Thap3      | 13.064   | 16.6387  | 14.92928 | 11.25485 | 13.71599 | 11.615696 |
| ENSMUSG Syt10      | 0.335093 | 0.426546 | 0.123337 | 0.433484 | 0.494608 | 0.634819  |
| ENSMUSG Fbxl5      | 39.10254 | 38.10841 | 36.8198  | 31.21993 | 31.6586  | 31.786289 |
| ENSMUSG Dnttip2    | 17.99946 | 19.00212 | 18.30648 | 15.39094 | 17.20229 | 16.480764 |
| ENSMUSG Parp10     | 10.40556 | 8.675205 | 16.35203 | 12.3066  | 8.489745 | 9.222191  |
| ENSMUSG Alkbh4     | 4.624987 | 4.772144 | 5.10883  | 4.85289  | 4.367463 | 4.342387  |
| ENSMUSG Rbpms      | 53.98601 | 50.03274 | 50.18507 | 33.87218 | 35.83145 | 31.925586 |
| ENSMUSG Gtf2e2     | 9.262017 | 10.33863 | 9.20863  | 9.041196 | 9.156166 | 9.384175  |
| ENSMUSG Cstl1      | 0        | 0.161008 | 0        | 0.317752 | 0        | 0.080237  |
| ENSMUSG Wrn        | 4.820525 | 4.941463 | 4.77698  | 5.319541 | 4.644165 | 4.777306  |
| ENSMUSG C1ra       | 22.99946 | 30.72322 | 26.15631 | 29.56437 | 30.13699 | 36.160408 |
| ENSMUSG Magohb     | 6.388305 | 5.077259 | 9.208473 | 6.014314 | 3.546473 | 5.691154  |
| ENSMUSG Ybx3       | 42.02528 | 44.66432 | 43.84649 | 36.11117 | 35.87369 | 37.028688 |
| ENSMUSG Zfp605     | 2.791251 | 2.507535 | 2.735457 | 3.441252 | 2.962521 | 2.849818  |
| ENSMUSG Bmt2       | 6.043945 | 6.566793 | 6.027757 | 6.234014 | 6.049011 | 6.292123  |
| ENSMUSG Kdm5a      | 8.289511 | 7.891569 | 7.481096 | 7.423401 | 7.55369  | 7.324794  |
| ENSMUSG AC164314   | 0        | 0        | 0        | 0        | 0        | 0         |
| ENSMUSG Sva        | 0        | 0        | 0        | 0        | 0        | 0         |
| ENSMUSG Klra2      | 2.675293 | 2.06795  | 4.550665 | 3.372373 | 2.206892 | 1.854251  |
| ENSMUSG Cdc37      | 18.09369 | 20.78509 | 21.34163 | 22.1825  | 31.46897 | 20.817433 |
| ENSMUSG Xab2       | 21.34476 | 20.46553 | 22.0505  | 17.14541 | 17.27438 | 17.216083 |
| ENSMUSG Rab4a      | 8.216404 | 8.798678 | 8.659937 | 6.584031 | 6.610303 | 6.881358  |
| ENSMUSG Srp54a     | 4.750936 | 6.17888  | 4.620827 | 4.093485 | 5.116276 | 10.881537 |
| ENSMUSG P2ry6      | 4.589861 | 4.875385 | 5.782982 | 17.36442 | 19.66246 | 19.760836 |
| ENSMUSG Smad6      | 105.3932 | 79.73607 | 103.7523 | 50.47822 | 54.13639 | 55.907291 |
| ENSMUSG Olfr964-ps | 0        | 0        | 0        | 0        | 0        | 0         |
| ENSMUSG Snurf      | 0.040856 | 0.03471  | 0.044462 | 0.040658 | 0        | 0.051174  |
| ENSMUSG Tmem53     | 3.848657 | 3.648321 | 3.117673 | 3.629778 | 3.107411 | 3.388953  |
| ENSMUSG Serpinb13  | 0        | 0        | 0        | 0        | 0        | 0         |
| ENSMUSG Pthlh      | 0.279173 | 0.500855 | 0.551493 | 0.537681 | 0.583354 | 0.604954  |
| ENSMUSG Tmem14a    | 5.063912 | 5.489465 | 5.170455 | 3.104    | 3.315438 | 3.237857  |
| ENSMUSG Eya1       | 1.650616 | 1.936228 | 1.1385   | 1.82301  | 2.314389 | 1.801039  |
| ENSMUSG Paqr8      | 7.257025 | 7.001164 | 6.579381 | 7.363854 | 6.789472 | 7.692937  |
| ENSMUSG Msc        | 0.314908 | 0.364296 | 0.236569 | 0.810672 | 0.869623 | 0.844397  |

|                   |          |          |          |          |          |           |
|-------------------|----------|----------|----------|----------|----------|-----------|
| ENSMUSG Lactb2    | 10.39805 | 10.6751  | 9.243328 | 8.159379 | 7.540289 | 7.720187  |
| ENSMUSG Tram1     | 43.01441 | 41.72632 | 40.0638  | 47.4452  | 51.2039  | 49.286233 |
| ENSMUSG Gsta3     | 132.6908 | 151.3108 | 138.5815 | 67.63846 | 71.07398 | 65.60324  |
| ENSMUSG Ube2w     | 13.69642 | 14.18158 | 13.23377 | 11.84335 | 11.54949 | 12.198208 |
| ENSMUSG Slco5a1   | 0.214151 | 0.288332 | 0.299782 | 0.259748 | 0.21614  | 0.20975   |
| ENSMUSG Olfr376   | 0        | 0        | 0        | 0        | 0        | 0         |
| ENSMUSG Uqcrh     | 82.80848 | 85.81614 | 92.01585 | 109.5504 | 101.1989 | 107.4759  |
| ENSMUSG Glcci1    | 7.984992 | 8.768881 | 9.122651 | 8.518098 | 8.63932  | 8.559378  |
| ENSMUSG Ptcd3     | 8.349604 | 8.240237 | 7.486474 | 7.490931 | 7.362563 | 7.289288  |
| ENSMUSG Nlgn1     | 0.028363 | 0.018611 | 0.009715 | 0.038875 | 0.00351  | 0.05521   |
| ENSMUSG Kif21a    | 4.09955  | 5.754968 | 3.165245 | 5.010129 | 4.438089 | 4.632198  |
| ENSMUSG Crem      | 9.706761 | 9.2377   | 8.01096  | 11.0251  | 8.675992 | 9.75835   |
| ENSMUSG Cdk8      | 8.733091 | 8.685767 | 8.766717 | 8.918058 | 9.027051 | 10.560112 |
| ENSMUSG Wasf3     | 3.965035 | 3.914202 | 3.832682 | 2.774077 | 3.121384 | 3.117182  |
| ENSMUSG Acr       | 0.146275 | 0.129378 | 0.069192 | 0.053686 | 0.091112 | 0         |
| ENSMUSG Shank3    | 28.4059  | 24.03489 | 25.54438 | 15.32241 | 16.8607  | 14.757273 |
| ENSMUSG Ndufa4    | 101.2702 | 109.3118 | 110.8743 | 110.2978 | 108.726  | 97.78799  |
| ENSMUSG Rabl2     | 7.946972 | 8.565138 | 7.169127 | 7.063498 | 8.952788 | 8.29677   |
| Mus_musc Mus_musc | 0.358155 | 0        | 0        | 0        | 0.137948 | 0         |
| Mus_musc Mus_musc | 0.27193  | 0.249082 | 0.145658 | 0.056635 | 0.129607 | 0.335258  |
| Mus_musc Mus_musc | 0        | 0        | 0.130746 | 0.149024 | 0.633562 | 0.257175  |
| Mus_musc Mus_musc | 0.083294 | 0.145976 | 0.157532 | 1.213969 | 1.150643 | 1.441945  |
| Mus_musc Mus_musc | 0        | 0        | 0        | 0.187496 | 0.186692 | 0         |
| Mus_musc Mus_musc | 0        | 0        | 0        | 0.247352 | 0.078868 | 0.495987  |
| Mus_musc Mus_musc | 0.519203 | 0.233043 | 0        | 0.084753 | 0.159949 | 0.075389  |
| ENSMUSG Hist1h2bp | 0.081387 | 0.05692  | 0        | 0.07866  | 0.091953 | 0.169263  |
| ENSMUSG Hist1h2an | 0.140186 | 0.044173 | 0.051584 | 0.042508 | 0        | 0.012185  |
| ENSMUSG Hist1h2bj | 4.576431 | 4.557749 | 4.954282 | 5.869322 | 3.455421 | 4.343893  |
| ENSMUSG Hist1h2ag | 0        | 0        | 0        | 0.040903 | 0.11548  | 0         |
| ENSMUSG Hist1h2ah | 0        | 0.014288 | 0.088764 | 0.256513 | 0.451288 | 0.102326  |
| ENSMUSG Hist1h2br | 9.088956 | 6.069345 | 12.86554 | 11.77756 | 10.77897 | 7.1485    |
| ENSMUSG Hist1h4n  | 2.559633 | 1.207021 | 1.093174 | 2.380379 | 2.271351 | 1.982358  |
| ENSMUSG Hist1h4m  | 1.007746 | 0.952533 | 0.574257 | 1.27352  | 0.546842 | 0.654503  |
| ENSMUSG Hist1h2bq | 5.049053 | 3.236155 | 2.935629 | 2.23426  | 1.543545 | 3.743615  |
| Mus_musc Mus_musc | 0        | 0.154507 | 0        | 0        | 0        | 0         |
| Mus_musc Mus_musc | 0.110041 | 0.157719 | 0.097266 | 0.224331 | 0.037126 | 0.183256  |
| ENSMUSG Spag4     | 0.190585 | 0.190243 | 0.002179 | 0.065942 | 0.104056 | 0.061145  |
| ENSMUSG Chpf2     | 10.11854 | 7.776862 | 10.84885 | 11.22806 | 10.48212 | 10.156683 |
| ENSMUSG Gm45785   | 0        | 0        | 0        | 0        | 0        | 0.011123  |
| ENSMUSG Ttc7      | 15.53172 | 15.24181 | 15.78246 | 17.9379  | 18.72055 | 20.03827  |
| ENSMUSG Btbd10    | 7.374837 | 8.610708 | 8.388864 | 7.737982 | 7.487017 | 7.454965  |
| ENSMUSG Scarf1    | 16.23625 | 14.79209 | 15.34332 | 10.73983 | 10.8121  | 9.907725  |
| ENSMUSG Zfp280c   | 2.289705 | 2.773413 | 2.285066 | 2.48353  | 2.204463 | 2.257047  |
| ENSMUSG Gm45783   | 0        | 0        | 0        | 0        | 0        | 0         |
| ENSMUSG Trim67    | 0.162039 | 0.106153 | 0.221845 | 0.042685 | 0.041976 | 0.050022  |
| ENSMUSG Piwil4    | 0.980913 | 0.894392 | 1.02905  | 0.931024 | 0.965557 | 0.940052  |
| ENSMUSG Sp140     | 8.228153 | 6.534927 | 11.41573 | 15.16109 | 13.11612 | 13.9986   |
| ENSMUSG Tcam1     | 0        | 0.077089 | 0        | 0.014869 | 0.018877 | 0.073968  |
| ENSMUSG Gh        | 0.047989 | 0        | 0        | 0        | 0        | 0         |
| ENSMUSG Sp110     | 11.86311 | 8.903248 | 15.93134 | 16.54898 | 12.00999 | 13.222343 |
| ENSMUSG Ern1      | 10.84303 | 11.38789 | 9.758774 | 11.26612 | 12.51981 | 11.689236 |
| ENSMUSG Nf1       | 6.126538 | 5.758322 | 5.315734 | 4.549448 | 4.47268  | 4.579442  |
| ENSMUSG Pecam1    | 294.3071 | 291.7121 | 306.9068 | 212.4281 | 236.6995 | 218.34882 |
| ENSMUSG Polg2     | 2.754913 | 1.828283 | 1.94832  | 2.327937 | 2.699695 | 2.556738  |
| ENSMUSG Ddx5      | 355.7984 | 330.6525 | 342.7302 | 301.9864 | 262.4312 | 273.21666 |
| ENSMUSG Rcbtb1    | 9.812846 | 10.48586 | 9.497443 | 10.80069 | 10.24987 | 10.488399 |
| ENSMUSG Nfxl1     | 5.204469 | 4.867333 | 5.031093 | 5.492371 | 5.582865 | 5.376819  |
| ENSMUSG Samt2     | 0        | 0        | 0        | 0        | 0        | 0         |
| ENSMUSG Irgm2     | 16.3599  | 12.24617 | 97.64782 | 49.91361 | 9.587407 | 13.016965 |
| ENSMUSG 4930438A  | 0.080675 | 0        | 0.071352 | 0        | 0        | 0.019624  |
| ENSMUSG Ube2j1    | 18.49714 | 19.25629 | 19.37507 | 29.12087 | 31.01953 | 29.187188 |
| ENSMUSG Rngtt     | 4.652545 | 5.040051 | 4.344413 | 4.269717 | 4.943294 | 4.247183  |
| ENSMUSG Pdlim5    | 21.06237 | 23.43891 | 22.93463 | 16.63553 | 17.8257  | 18.205649 |
| ENSMUSG Gtf2b     | 26.68069 | 25.28964 | 29.74588 | 27.50553 | 25.27274 | 25.583849 |

|                   |          |          |          |          |          |           |
|-------------------|----------|----------|----------|----------|----------|-----------|
| ENSMUSG Gbp2      | 22.76839 | 20.55006 | 82.16307 | 48.83515 | 18.57003 | 21.027319 |
| ENSMUSG Acs1      | 20.47079 | 25.47742 | 14.89468 | 19.23357 | 18.36655 | 18.050628 |
| ENSMUSG Rragd     | 1.650269 | 2.610008 | 1.798118 | 3.435724 | 3.146333 | 3.839334  |
| ENSMUSG Zfp651    | 6.153217 | 6.513102 | 5.522397 | 4.527623 | 4.726067 | 4.230543  |
| ENSMUSG B4galnt2  | 0        | 0.048479 | 0        | 0.10732  | 0        | 0         |
| ENSMUSG Zfp622    | 12.98786 | 11.86017 | 10.84618 | 11.11138 | 12.92002 | 12.923091 |
| ENSMUSG Igf2bp1   | 0.308216 | 0.208717 | 0.243849 | 0.176052 | 0.256262 | 0.183291  |
| ENSMUSG Hinfp     | 4.284996 | 3.551749 | 4.139436 | 3.85296  | 3.322823 | 4.224218  |
| ENSMUSG Fez1      | 0.077875 | 0.495729 | 0.082867 | 0.211167 | 0.435025 | 0.387451  |
| ENSMUSG Acrv1     | 0        | 0        | 0        | 0        | 0        | 0         |
| ENSMUSG Chek1     | 0.335555 | 0.20328  | 0.235358 | 0.306327 | 0.603761 | 0.866776  |
| ENSMUSG Trappc4   | 23.13957 | 23.64266 | 25.57706 | 24.23602 | 23.3437  | 22.455723 |
| ENSMUSG Hyou1     | 27.39433 | 28.12456 | 31.44178 | 41.77669 | 46.92805 | 45.898139 |
| ENSMUSG Slc37a4   | 6.220886 | 6.638276 | 6.387722 | 6.674205 | 6.008413 | 7.321016  |
| ENSMUSG Stt3a     | 23.40419 | 22.50526 | 23.99408 | 25.36896 | 28.11562 | 28.026173 |
| ENSMUSG Egr4      | 0        | 0        | 0        | 0.024346 | 0        | 0         |
| ENSMUSG Trappc3l  | 0        | 0        | 0        | 0        | 0        | 0         |
| ENSMUSG Lsmem1    | 0        | 0.08682  | 0        | 0.031297 | 0        | 0         |
| ENSMUSG C1qtnf9   | 0.284369 | 0.864392 | 0.331481 | 0.454563 | 0.485322 | 0.415895  |
| ENSMUSG Gm10770   | 0        | 0        | 0        | 0        | 0        | 0         |
| ENSMUSG Rfk       | 49.38007 | 44.85837 | 39.07006 | 53.9218  | 61.89152 | 59.225376 |
| ENSMUSG Pcsk5     | 3.978566 | 3.684393 | 3.770923 | 4.531703 | 4.481429 | 5.996902  |
| ENSMUSG 0610040J0 | 5.70814  | 7.780601 | 5.0231   | 7.366724 | 7.081367 | 8.361225  |
| ENSMUSG Zfp266    | 11.43954 | 14.22288 | 11.54163 | 9.245858 | 9.328296 | 9.9207    |
| ENSMUSG Tor3a     | 27.1856  | 27.1722  | 29.04981 | 30.11206 | 28.8952  | 30.124938 |
| ENSMUSG Serpinc1  | 0.011522 | 0.054759 | 0        | 0.020615 | 0        | 0         |
| ENSMUSG Mrc1      | 22.47399 | 21.35801 | 23.36936 | 37.11693 | 43.61342 | 43.177391 |
| ENSMUSG Stam      | 8.541825 | 9.867762 | 8.589961 | 7.816025 | 8.271064 | 8.65668   |
| ENSMUSG Gys1      | 7.999476 | 8.004488 | 6.286062 | 7.755524 | 8.618577 | 8.137948  |
| ENSMUSG Ppfia3    | 0.098689 | 0.079159 | 0.150357 | 0.203486 | 0.373345 | 0.302498  |
| ENSMUSG Ruvbl2    | 21.59389 | 24.04754 | 20.97704 | 22.62027 | 21.46233 | 22.788659 |
| ENSMUSG Arhgef38  | 5.300415 | 6.015742 | 3.919372 | 4.833703 | 4.51683  | 4.842156  |
| ENSMUSG Sfta2     | 20.40006 | 26.49079 | 29.57249 | 26.913   | 19.8708  | 25.849875 |
| ENSMUSG Gzmd      | 0        | 0        | 0        | 0        | 0        | 0         |
| ENSMUSG Olfr345   | 0        | 0        | 0        | 0        | 0        | 0         |
| ENSMUSG Asgr2     | 0.729666 | 0.325027 | 0.629358 | 0.143978 | 0.138557 | 0.114697  |
| ENSMUSG Dennd2c   | 1.934404 | 2.284045 | 1.926745 | 1.361729 | 1.445544 | 1.266827  |
| ENSMUSG Arhgef10l | 5.107513 | 5.443515 | 6.74359  | 6.60275  | 5.421202 | 6.154899  |
| ENSMUSG Slc22a2   | 0        | 0.10053  | 0.017779 | 0        | 0.060133 | 0         |
| ENSMUSG 6720489N  | 1.088643 | 1.577052 | 1.206795 | 0.921385 | 1.243608 | 0.775933  |
| ENSMUSG Gm15294   | 0        | 0        | 0        | 0        | 0        | 0         |
| ENSMUSG 7-Mar     | 16.11512 | 15.39432 | 13.55164 | 15.54712 | 13.18097 | 12.188414 |
| ENSMUSG C330007Pi | 18.80704 | 19.37678 | 17.40278 | 15.2998  | 16.03536 | 15.027657 |
| ENSMUSG Hck       | 20.43294 | 16.82219 | 24.17607 | 17.98338 | 13.90986 | 17.164267 |
| ENSMUSG Plag1     | 0.270152 | 0.390298 | 0.301141 | 0.339518 | 0.336663 | 0.285233  |
| ENSMUSG Pcdhga3   | 0.535536 | 0.397236 | 0.373898 | 0.354477 | 0.363864 | 0.227981  |
| Mus_musc Mus_musc | 0.11303  | 0.313061 | 0.184833 | 0.315038 | 0.538445 | 0.618654  |
| Mus_musc Mus_musc | 0        | 0        | 0        | 0.124197 | 0        | 0         |
| Mus_musc Mus_musc | 0.480045 | 0.892837 | 0.436415 | 0.421051 | 0.821427 | 0.308333  |
| Mus_musc Mus_musc | 0        | 0.154309 | 0        | 0        | 0        | 0         |
| Mus_musc Mus_musc | 0.23284  | 0        | 0        | 0        | 0        | 0.16457   |
| Mus_musc Mus_musc | 0        | 0        | 0        | 0        | 0        | 0         |
| Mus_musc Mus_musc | 0        | 0        | 0        | 0        | 0        | 0         |
| Mus_musc Mus_musc | 0.218508 | 0        | 0.272587 | 0.065502 | 0        | 0         |
| Mus_musc Mus_musc | 0.287669 | 0        | 0        | 0        | 0        | 0         |
| Mus_musc Mus_musc | 0.950897 | 2.097625 | 0.957677 | 1.041569 | 0.999984 | 1.02237   |
| Mus_musc Mus_musc | 0        | 0        | 0        | 0        | 0        | 0         |
| ENSMUSG Gm28891   | 0        | 0        | 0        | 0        | 0        | 0         |
| Mus_musc Mus_musc | 0.432079 | 0.508551 | 0        | 0        | 0        | 0.2564    |
| Mus_musc Mus_musc | 0.339999 | 0        | 0        | 0        | 0        | 0         |
| ENSMUSG Pafah1b2  | 16.52062 | 15.86902 | 14.87854 | 13.2668  | 12.69922 | 13.657499 |
| ENSMUSG Gm20873   | 0        | 0        | 0        | 0        | 0        | 0         |
| ENSMUSG Cnot11    | 8.294248 | 7.051265 | 6.063826 | 6.172928 | 6.672259 | 7.249613  |
| ENSMUSG Tbc1d8    | 10.71424 | 10.56713 | 9.947802 | 9.668364 | 10.30998 | 10.216451 |



|                   |          |          |          |          |          |           |
|-------------------|----------|----------|----------|----------|----------|-----------|
| ENSMUSG Olfr1009  | 0        | 0        | 0        | 0        | 0        | 0         |
| ENSMUSG Arfgef2   | 14.25819 | 13.62372 | 13.16657 | 12.82373 | 13.94464 | 14.205002 |
| Mus_musc Mus_musc | 3.382957 | 4.579618 | 3.979963 | 3.019313 | 3.198552 | 4.01217   |
| Mus_musc Mus_musc | 0.97878  | 0.799587 | 0.523819 | 0.550037 | 0.494846 | 0.250199  |
| Mus_musc Mus_musc | 0.317732 | 0.14023  | 0.406233 | 1.09459  | 0.683403 | 0.702139  |
| Mus_musc Mus_musc | 0        | 0        | 0.758787 | 0.210048 | 0        | 0.525911  |
| Mus_musc Mus_musc | 0.868409 | 1.070344 | 0.807297 | 0.999911 | 1.042767 | 1.235442  |
| Mus_musc Mus_musc | 0        | 0        | 0        | 0        | 0        | 0         |
| Mus_musc Mus_musc | 0        | 0.044088 | 0        | 0        | 0        | 0.151609  |
| Mus_musc Mus_musc | 0.559596 | 0.201931 | 0        | 0.491658 | 0.483256 | 0.393048  |
| Mus_musc Mus_musc | 0.366902 | 0.234431 | 0.446381 | 0.393767 | 0.54428  | 0.3875    |
| Mus_musc Mus_musc | 0.5191   | 0.533962 | 0.610417 | 0.984833 | 0.743272 | 0.529778  |
| ENSMUSG Caskin2   | 55.07876 | 49.56528 | 54.90682 | 31.29279 | 30.40891 | 31.600726 |
| ENSMUSG Rasd2     | 0.945377 | 0.976377 | 0.846364 | 0.723313 | 0.766435 | 0.819924  |
| ENSMUSG Sec22a    | 4.33582  | 4.344615 | 4.300612 | 3.826488 | 3.600084 | 3.718237  |
| ENSMUSG Fbxw18    | 0        | 0        | 0        | 0        | 0        | 0         |
| ENSMUSG Tyrp1     | 0        | 0        | 0        | 0        | 0        | 0         |
| ENSMUSG Sox18     | 140.4813 | 97.24894 | 109.0818 | 92.56005 | 84.82977 | 84.930214 |
| Mus_musc Mus_musc | 0        | 0.013127 | 0.070729 | 0        | 0        | 0.194172  |
| ENSMUSG Krtap4-16 | 0        | 0        | 0        | 0        | 0        | 0         |
| Mus_musc Mus_musc | 0        | 0        | 0        | 0        | 0.203888 | 0         |
| Mus_musc Mus_musc | 0        | 0        | 0.201633 | 0.119987 | 0        | 0         |
| ENSMUSG Syn2      | 2.304933 | 1.600689 | 2.03357  | 1.857775 | 1.290188 | 2.087274  |
| Mus_musc Mus_musc | 0.113317 | 0.122085 | 0.085574 | 0.10277  | 0.103052 | 0.110636  |
| Mus_musc Mus_musc | 1.260202 | 1.468424 | 1.465672 | 1.699226 | 1.648106 | 1.587352  |
| ENSMUSG Il17re    | 8.0142   | 8.113028 | 7.370596 | 6.274202 | 5.533587 | 6.643386  |
| ENSMUSG Mier2     | 6.488595 | 5.385961 | 5.944477 | 6.413745 | 7.13765  | 6.117974  |
| ENSMUSG Ube2q1    | 29.56864 | 29.55733 | 29.86759 | 28.07323 | 27.52477 | 27.259943 |
| ENSMUSG Spata25   | 0.155975 | 0        | 0.078665 | 0.266559 | 0.140851 | 0.10545   |
| ENSMUSG Slc12a4   | 24.65907 | 19.76391 | 24.49408 | 17.42753 | 17.90813 | 19.051144 |
| ENSMUSG Zswim1    | 4.01991  | 3.393207 | 4.063046 | 3.696155 | 3.224222 | 3.534674  |
| ENSMUSG Hlhf      | 8.833337 | 9.781608 | 8.99584  | 9.748476 | 9.380506 | 9.257568  |
| ENSMUSG Ctsa      | 51.59221 | 45.00062 | 47.76523 | 69.54905 | 76.44493 | 83.115005 |
| ENSMUSG Gzmc      | 0        | 0.079129 | 0        | 0.231243 | 0        | 0         |
| ENSMUSG Mphosph8  | 10.83366 | 11.4438  | 11.52968 | 10.21529 | 8.931345 | 10.050716 |
| ENSMUSG C030005K  | 0        | 0        | 0        | 0        | 0        | 0         |
| ENSMUSG Mptx2     | 0        | 0        | 0        | 0        | 0        | 0         |
| Mus_musc Mus_musc | 0        | 0        | 0        | 0        | 0.253072 | 0.076858  |
| Mus_musc Mus_musc | 0        | 0.197454 | 0        | 0.072983 | 0.067113 | 0         |
| Mus_musc Mus_musc | 1.264657 | 1.161864 | 0.847577 | 1.063072 | 0.864566 | 1.17711   |
| Mus_musc Mus_musc | 0        | 0        | 0        | 0.211251 | 0        | 0         |
| Mus_musc Mus_musc | 24.19841 | 19.11349 | 23.13113 | 11.1109  | 10.19064 | 10.67107  |
| Mus_musc Mus_musc | 0.124611 | 0.044724 | 0.152329 | 0        | 0.33573  | 0         |
| ENSMUSG Ankhd1    | 19.40309 | 17.99029 | 18.07071 | 17.53172 | 17.2316  | 18.139268 |
| Mus_musc Mus_musc | 0.118592 | 0.226342 | 0        | 0        | 0.063909 | 0.766933  |
| ENSMUSG E430018J2 | 2.01299  | 1.652942 | 2.006581 | 1.811082 | 2.008556 | 2.166111  |
| ENSMUSG AU022252  | 2.97599  | 3.365338 | 3.056537 | 2.698147 | 2.861809 | 2.724017  |
| ENSMUSG Alg8      | 2.024173 | 2.181293 | 2.482881 | 2.351949 | 2.536232 | 2.452414  |
| ENSMUSG Ccdc24    | 1.369761 | 1.241361 | 1.063882 | 1.694578 | 1.928628 | 1.767026  |
| ENSMUSG Fbxo10    | 4.61531  | 4.250496 | 4.276982 | 3.759725 | 4.449521 | 3.762148  |
| ENSMUSG Vmn1r64   | 0        | 0        | 0        | 0        | 0        | 0         |
| ENSMUSG Prss43    | 0        | 0        | 0        | 0        | 0        | 0         |
| ENSMUSG Rrp1b     | 4.287114 | 4.772675 | 3.838723 | 3.404055 | 3.551767 | 3.395581  |
| ENSMUSG Gpr182    | 25.05508 | 18.22687 | 25.42497 | 12.60306 | 15.25962 | 10.77198  |
| ENSMUSG Fut9      | 0.015806 | 0.05724  | 0.040264 | 0.195141 | 0.133057 | 0.123044  |
| ENSMUSG Stam2     | 10.31286 | 9.703887 | 8.608742 | 8.133963 | 8.72463  | 8.41968   |
| ENSMUSG Krt71     | 0        | 0        | 0        | 0        | 0        | 0         |
| Mus_musc Mus_musc | 1.414301 | 0.823433 | 1.146511 | 0.58601  | 1.674571 | 1.389414  |
| Mus_musc Mus_musc | 0        | 0        | 0        | 0.144282 | 0        | 0         |
| ENSMUSG Vmn2r72   | 0        | 0        | 0        | 0        | 0        | 0         |
| ENSMUSG Piezo1    | 26.18254 | 24.08744 | 24.08043 | 21.72203 | 21.11244 | 23.804541 |
| ENSMUSG Speer4f1  | 0.079045 | 0.106886 | 0.1341   | 0.124139 | 0        | 0.037101  |
| ENSMUSG Capza3    | 0        | 0        | 0        | 0        | 0        | 0         |
| ENSMUSG Myrip     | 10.41959 | 6.627482 | 9.203629 | 3.114059 | 3.266013 | 2.943714  |

|                   |          |          |          |          |          |           |
|-------------------|----------|----------|----------|----------|----------|-----------|
| ENSMUSG Olfr807   | 0        | 0        | 0        | 0        | 0        | 0         |
| ENSMUSG Gck       | 0.258155 | 0.323218 | 0.283088 | 0.923875 | 0.479978 | 0.755802  |
| ENSMUSG Gm7714    | 0        | 0        | 0        | 0        | 0        | 0         |
| ENSMUSG Vmn2r99   | 0        | 0        | 0        | 0        | 0        | 0         |
| ENSMUSG Slc35d3   | 0.240223 | 0.273122 | 0.195529 | 0.162834 | 0.128058 | 0.219343  |
| ENSMUSG Fam118b   | 11.9549  | 12.26747 | 13.11821 | 11.04427 | 12.0851  | 13.088486 |
| ENSMUSG Gpr34     | 1.49817  | 1.155856 | 1.362937 | 3.601696 | 3.14739  | 2.830441  |
| ENSMUSG Gas8      | 9.532464 | 8.801775 | 7.965069 | 7.575393 | 7.008322 | 7.381591  |
| ENSMUSG Prrc2c    | 24.73231 | 22.1279  | 20.63032 | 20.37292 | 21.33814 | 21.864561 |
| Mus_musc Mus_musc | 0        | 0.199199 | 0.14398  | 0.212379 | 0.2427   | 0.472186  |
| Mus_musc Mus_musc | 0.314321 | 0.203443 | 0.082157 | 0.828092 | 0.090095 | 0.095988  |
| Mus_musc Mus_musc | 0        | 0        | 0.297861 | 0        | 0.288525 | 0         |
| Mus_musc Mus_musc | 0        | 0        | 0        | 0.202822 | 0.693005 | 0         |
| Mus_musc Mus_musc | 0        | 0.06085  | 0        | 0.194868 | 0.095583 | 0         |
| Mus_musc Mus_musc | 0.401648 | 0.659231 | 0.642176 | 0.051115 | 0.176612 | 0.216807  |
| Mus_musc Mus_musc | 0        | 0.202086 | 0        | 0.201457 | 0        | 0.212523  |
| Mus_musc Mus_musc | 0.316619 | 0.509121 | 0.331566 | 0.549594 | 0.50151  | 0.289307  |
| Mus_musc Mus_musc | 0.792894 | 0.240419 | 0.148134 | 0        | 0        | 0.026312  |
| ENSMUSG 5031410I0 | 0        | 0        | 0        | 0        | 0        | 0         |
| ENSMUSG Tmem136   | 1.012923 | 1.145492 | 0.988576 | 1.030411 | 0.833347 | 0.672125  |
| ENSMUSG Olfr1263  | 0        | 0        | 0        | 0        | 0        | 0         |
| ENSMUSG Gm10061   | 0        | 0        | 0        | 0        | 0        | 0         |
| ENSMUSG Lrrc74a   | 0        | 0        | 0        | 0        | 0        | 0         |
| ENSMUSG Nap114    | 44.84611 | 46.38817 | 49.1656  | 41.5193  | 38.8811  | 40.473888 |
| ENSMUSG Pgm3      | 6.52117  | 6.485684 | 5.470984 | 6.878335 | 6.846053 | 7.186556  |
| ENSMUSG Ticam2    | 2.144603 | 2.094451 | 2.106576 | 4.626301 | 4.963384 | 5.269852  |
| ENSMUSG Unc93a2   | 0        | 0        | 0        | 0        | 0        | 0         |
| ENSMUSG Oog4      | 0        | 0        | 0        | 0        | 0        | 0         |
| ENSMUSG Cd300lf   | 7.751837 | 4.740363 | 9.112581 | 10.59122 | 10.24095 | 11.184157 |
| ENSMUSG Sned1     | 4.563027 | 4.84285  | 4.142533 | 3.746599 | 3.173851 | 3.476308  |
| ENSMUSG Gjb1      | 0.563013 | 0.830292 | 0.430168 | 3.248694 | 3.391888 | 3.872148  |
| ENSMUSG Olfr685   | 0        | 0        | 0        | 0        | 0        | 0         |
| ENSMUSG Zfp595    | 2.079635 | 2.520548 | 2.577243 | 2.31086  | 2.296316 | 1.871317  |
| ENSMUSG Rpl32     | 285.9427 | 308.0961 | 316.6362 | 400.3083 | 347.885  | 379.46922 |
| ENSMUSG Slamf6    | 1.841776 | 1.082277 | 1.465088 | 4.679694 | 3.826318 | 4.569903  |
| ENSMUSG Slamf1    | 0.830676 | 1.207428 | 1.755386 | 1.359917 | 1.258111 | 1.44025   |
| ENSMUSG Zfp763    | 3.958539 | 4.043589 | 3.309254 | 2.748505 | 3.233992 | 2.508598  |
| ENSMUSG Gadd45b   | 40.04912 | 44.43615 | 43.18335 | 36.64529 | 36.16214 | 35.82045  |
| ENSMUSG Vmn1r202  | 0        | 0        | 0        | 0        | 0        | 0         |
| ENSMUSG Gm15097   | 0        | 0        | 0        | 0        | 0        | 0         |
| ENSMUSG Gm3373    | 0.065213 | 0.035519 | 0.073242 | 0.023837 | 0.10958  | 0.03256   |
| ENSMUSG Gm28048   | 0.675682 | 0        | 0        | 0        | 0        | 0         |
| ENSMUSG C2cd3     | 6.017469 | 6.409683 | 4.541113 | 6.300125 | 6.167976 | 5.894815  |
| ENSMUSG Hist1h2be | 1.946923 | 2.178652 | 1.258795 | 1.330965 | 1.303184 | 1.473218  |
| ENSMUSG Gm8720    | 0        | 0        | 0        | 0        | 0        | 0         |
| ENSMUSG Taf9b     | 10.49755 | 10.40667 | 10.18057 | 9.38795  | 7.937899 | 8.993052  |
| ENSMUSG Chaf1a    | 1.84966  | 1.91851  | 1.830141 | 2.766713 | 2.904776 | 3.236204  |
| ENSMUSG Bbof1     | 2.411287 | 2.521635 | 1.227737 | 3.178145 | 2.289259 | 1.800589  |
| Mus_musc Mus_musc | 0        | 0        | 0        | 0        | 0.186692 | 0         |
| Mus_musc Mus_musc | 0        | 0.236267 | 0.500892 | 0.277613 | 0.115502 | 0         |
| Mus_musc Mus_musc | 0        | 0        | 0        | 0        | 0.150324 | 0         |
| Mus_musc Mus_musc | 0        | 0.234566 | 0.110214 | 0.102469 | 0.016224 | 0         |
| ENSMUSG Tmed5     | 15.41898 | 14.9899  | 16.37431 | 18.40767 | 16.7991  | 17.822479 |
| ENSMUSG Lrrc43    | 1.557279 | 1.404783 | 0.973736 | 1.631916 | 1.694174 | 2.12052   |
| ENSMUSG Olfr521   | 0        | 0        | 0        | 0        | 0        | 0         |
| ENSMUSG Kcnt2     | 0.078817 | 0.140104 | 0.017098 | 0.091065 | 0.115691 | 0.147429  |
| ENSMUSG Gm10604   | 0.066131 | 0.05816  | 0.143982 | 0.128523 | 0        | 0.120919  |
| ENSMUSG 1700020D  | 0.280113 | 0.213101 | 0.4393   | 0.496994 | 0.409269 | 0.209262  |
| ENSMUSG Tenm1     | 0.004117 | 0        | 0.015741 | 0        | 0        | 0.00429   |
| ENSMUSG Gm28998   | 0        | 0        | 0        | 0        | 0        | 0         |
| ENSMUSG Set       | 35.51726 | 34.80717 | 35.1824  | 35.83787 | 37.05434 | 36.605733 |
| ENSMUSG Mtnr1a    | 0        | 0        | 0        | 0.033125 | 0        | 0         |
| ENSMUSG Defb42    | 0        | 0        | 0        | 0        | 0        | 0         |
| ENSMUSG Rab3ip    | 15.71476 | 16.75144 | 15.36393 | 12.34621 | 12.61725 | 13.430257 |

|                    |          |          |          |          |          |           |
|--------------------|----------|----------|----------|----------|----------|-----------|
| ENSMUSG Cyp3a59    | 0        | 0        | 0        | 0        | 0        | 0         |
| ENSMUSG Cyth3      | 89.25938 | 90.29754 | 95.18189 | 52.37775 | 57.06856 | 49.029428 |
| ENSMUSG Vmn1r210   | 0        | 0        | 0        | 0        | 0        | 0         |
| ENSMUSG Olfr1261   | 0        | 0        | 0        | 0        | 0        | 0         |
| ENSMUSG Agbl4      | 0.090235 | 0.048029 | 0.026605 | 0.116434 | 0.072809 | 0.048863  |
| ENSMUSG Cyth4      | 14.66896 | 14.17392 | 17.68764 | 35.32451 | 30.62826 | 35.663509 |
| ENSMUSG Clip3      | 3.113735 | 2.744553 | 2.510581 | 2.052672 | 2.68266  | 2.577434  |
| ENSMUSG Jak1       | 52.95453 | 50.36635 | 51.72571 | 47.42505 | 48.99587 | 49.127552 |
| ENSMUSG AI413582   | 7.570367 | 8.192631 | 9.310984 | 10.57765 | 12.57036 | 12.983028 |
| ENSMUSG Prss1      | 0        | 0        | 0        | 0        | 0        | 0         |
| ENSMUSG Olfr1206   | 0        | 0        | 0        | 0        | 0        | 0         |
| ENSMUSG Obox8      | 0        | 0        | 0        | 0        | 0        | 0         |
| ENSMUSG Gsdma      | 0        | 0        | 0        | 0        | 0        | 0         |
| ENSMUSG Cyp4f39    | 1.819166 | 2.415538 | 2.870277 | 2.988148 | 2.179245 | 2.374839  |
| ENSMUSG 2610528J1  | 6.68722  | 7.31165  | 7.707418 | 6.980579 | 6.42662  | 6.808889  |
| ENSMUSG Rnf14      | 31.28821 | 32.66099 | 31.26694 | 27.23593 | 27.87012 | 26.099004 |
| ENSMUSG Rhox4e     | 0        | 0        | 0        | 0        | 0        | 0         |
| ENSMUSG Rhox4b     | 0        | 0        | 0        | 0        | 0        | 0         |
| ENSMUSG Kng2       | 0        | 0        | 0        | 0.022757 | 0.146326 | 0.070977  |
| ENSMUSG H2al1m     | 0.104032 | 0.358805 | 0        | 0.015287 | 0.036757 | 0.16112   |
| ENSMUSG Fam20b     | 23.70248 | 24.35452 | 23.02805 | 21.18984 | 22.46115 | 20.924422 |
| ENSMUSG Dph5       | 3.813568 | 5.055459 | 2.325135 | 3.912274 | 2.411975 | 4.885248  |
| ENSMUSG Cab39      | 54.62351 | 55.19729 | 50.47424 | 46.50966 | 45.17703 | 44.923872 |
| ENSMUSG Gm17509    | 0.016957 | 0.107164 | 0.050087 | 0.039778 | 0.046428 | 0         |
| ENSMUSG Olfr451-ps | 0        | 0        | 0        | 0        | 0        | 0         |
| ENSMUSG Tdrd5      | 0.585634 | 1.147774 | 1.063237 | 0.653101 | 0.765664 | 0.664899  |
| ENSMUSG Fut4       | 2.099315 | 2.485273 | 2.500371 | 3.353292 | 3.387362 | 3.454374  |
| ENSMUSG Ccdc71     | 14.47453 | 14.35038 | 13.61286 | 14.13669 | 11.34033 | 13.080504 |
| ENSMUSG Hist1h4h   | 1.735353 | 3.018059 | 3.746968 | 2.832015 | 2.346893 | 2.614661  |
| ENSMUSG Syt12      | 0.238    | 0.285651 | 0.195213 | 0.421118 | 0.367129 | 0.404942  |
| ENSMUSG Prmt6      | 5.403332 | 5.992717 | 5.367562 | 6.035123 | 5.135385 | 5.504892  |
| ENSMUSG Galnt13    | 0.470511 | 0.577486 | 1.394716 | 0.218994 | 0.257954 | 0.166824  |
| ENSMUSG Scd1       | 90.97181 | 131.6655 | 92.52505 | 271.9065 | 224.1163 | 296.607   |
| ENSMUSG Rbmxl1     | 21.18079 | 22.28257 | 21.53812 | 22.42944 | 22.72781 | 22.384679 |
| ENSMUSG Gm26727    | 0        | 0        | 0        | 0        | 0        | 0         |
| ENSMUSG Selenof    | 212.349  | 207.1108 | 214.0828 | 187.3629 | 185.7973 | 183.29194 |
| ENSMUSG Rnf139     | 9.858123 | 10.45882 | 10.2834  | 8.729525 | 8.943659 | 8.516026  |
| ENSMUSG Ldhd       | 2.472783 | 2.327232 | 1.629829 | 2.289005 | 2.307987 | 2.761092  |
| ENSMUSG Wdr59      | 5.507239 | 5.622003 | 5.238442 | 3.95155  | 4.495695 | 3.977733  |
| ENSMUSG Ii3        | 0        | 0        | 0        | 0        | 0        | 0         |
| ENSMUSG Csf2       | 0.971713 | 2.017787 | 2.563606 | 1.930332 | 1.374989 | 2.589662  |
| ENSMUSG Tm4sf5     | 0.141964 | 0.318494 | 0        | 0.600356 | 0.771039 | 0.460097  |
| ENSMUSG Tmem231    | 3.781738 | 3.966919 | 3.582194 | 4.558138 | 4.281536 | 3.344197  |
| ENSMUSG Chst5      | 0.71938  | 0.644818 | 1.0802   | 0.629473 | 0.406069 | 0.389307  |
| ENSMUSG Tmem170    | 4.479008 | 4.560718 | 4.27716  | 3.741684 | 3.975613 | 3.820749  |
| ENSMUSG Cfdp1      | 33.96888 | 35.4582  | 39.60972 | 34.42625 | 35.04956 | 31.173992 |
| ENSMUSG Bcar1      | 19.29894 | 14.49426 | 18.33961 | 10.9444  | 10.89928 | 11.465481 |
| ENSMUSG Ctrb1      | 0        | 0        | 0        | 0.059459 | 0        | 0         |
| ENSMUSG Hhla1      | 0        | 0        | 0        | 0        | 0        | 0         |
| ENSMUSG Ckm        | 0.875457 | 6.948419 | 0.518884 | 2.919435 | 2.088203 | 1.56572   |
| ENSMUSG Zik1       | 0.996043 | 0.692389 | 1.006717 | 0.845174 | 0.605294 | 0.647086  |
| ENSMUSG Mark4      | 15.57171 | 13.699   | 13.63367 | 9.873035 | 9.759935 | 9.148931  |
| ENSMUSG Olfr107    | 0        | 0        | 0        | 0        | 0        | 0         |
| ENSMUSG Iltifb     | 0        | 0        | 0        | 0        | 0        | 0         |
| ENSMUSG Rrm2b      | 14.32502 | 13.70343 | 11.63547 | 10.83377 | 10.1674  | 9.537469  |
| ENSMUSG Fzd6       | 13.40448 | 13.87685 | 12.02588 | 10.23695 | 10.99275 | 11.011446 |
| ENSMUSG Baalc      | 0.047352 | 0.10151  | 0.012788 | 0.039519 | 0.034908 | 0.052286  |
| ENSMUSG Atp6v1c1   | 21.59476 | 24.85056 | 24.75051 | 27.89939 | 28.62456 | 30.795948 |
| ENSMUSG Slc25a32   | 5.607476 | 6.123417 | 5.085493 | 4.958989 | 5.038555 | 4.63552   |
| ENSMUSG Nup35      | 9.202384 | 10.26666 | 10.41413 | 7.43174  | 7.956699 | 8.514273  |
| ENSMUSG Galnt3     | 3.320606 | 3.810188 | 2.968363 | 3.402878 | 3.39016  | 3.808341  |
| ENSMUSG Pkp4       | 39.59669 | 41.54589 | 37.37657 | 26.49871 | 27.40669 | 23.688238 |
| ENSMUSG Olfr1502   | 0        | 0        | 0        | 0        | 0        | 0         |
| ENSMUSG Jakmip3    | 0.016348 | 0.027854 | 0.015247 | 0        | 0        | 0         |

|                   |          |          |          |          |          |           |
|-------------------|----------|----------|----------|----------|----------|-----------|
| ENSMUSG Pou3f4    | 0        | 0        | 0        | 0        | 0        | 0         |
| ENSMUSG Olfr765   | 0        | 0        | 0        | 0        | 0        | 0         |
| ENSMUSG Pcbp2     | 164.5936 | 140.8616 | 141.7265 | 132.0161 | 133.4487 | 137.02722 |
| ENSMUSG Wdr63     | 2.590376 | 3.324087 | 1.700798 | 3.45679  | 3.921627 | 3.844758  |
| ENSMUSG Cfap70    | 1.748323 | 2.031497 | 1.143203 | 2.246734 | 2.016694 | 2.607946  |
| ENSMUSG Ncam1     | 0.239731 | 0.246793 | 0.211251 | 0.16188  | 0.12614  | 0.369677  |
| ENSMUSG 4921524L2 | 0        | 0        | 0        | 0        | 0        | 0         |
| ENSMUSG Trpv3     | 0.038638 | 0.028535 | 0.068327 | 0.042199 | 0.028156 | 0.010354  |
| ENSMUSG Ajap1     | 0.164743 | 0.12287  | 0.229239 | 0.044075 | 0        | 0.017706  |
| ENSMUSG Gpn2      | 8.64347  | 8.600524 | 9.141966 | 9.224695 | 8.475177 | 9.105693  |
| ENSMUSG Map7d1    | 71.75802 | 63.14866 | 71.14804 | 47.76583 | 54.39308 | 56.086994 |
| ENSMUSG Tekt2     | 4.767468 | 4.953066 | 4.281906 | 4.352666 | 4.193938 | 4.250524  |
| ENSMUSG Trappc3   | 31.25684 | 30.90072 | 37.13529 | 26.61894 | 28.4172  | 30.527351 |
| ENSMUSG Zfp593    | 3.137572 | 2.90624  | 3.084197 | 3.49158  | 3.3978   | 3.061715  |
| ENSMUSG Cnksr1    | 5.484339 | 4.834826 | 3.681343 | 3.336308 | 3.201418 | 3.841119  |
| ENSMUSG Ago3      | 3.239307 | 3.665804 | 3.049502 | 2.780997 | 2.800289 | 2.794952  |
| ENSMUSG Sh3bgrl3  | 70.84064 | 69.12382 | 74.66278 | 117.1757 | 115.3187 | 125.42955 |
| ENSMUSG Gpr142    | 0        | 0        | 0        | 0        | 0        | 0         |
| ENSMUSG Tdg       | 2.83318  | 2.132494 | 2.120354 | 1.68668  | 2.243236 | 2.667318  |
| ENSMUSG Dbn1      | 4.787733 | 3.401658 | 4.296488 | 3.94456  | 3.574349 | 3.299283  |
| ENSMUSG Pbx2      | 22.25545 | 22.48694 | 23.85377 | 21.30951 | 21.36603 | 21.109307 |
| ENSMUSG Hmgcr     | 14.77846 | 12.4657  | 15.35543 | 17.30845 | 14.79733 | 20.13052  |
| ENSMUSG Poc5      | 5.580956 | 4.765739 | 4.718047 | 4.334405 | 4.258031 | 3.681433  |
| ENSMUSG Gm47955   | 0        | 0        | 0        | 0        | 0        | 0         |
| ENSMUSG Ift81     | 6.313724 | 6.630521 | 5.730335 | 6.942913 | 6.324631 | 5.856014  |
| ENSMUSG P2rx7     | 6.231748 | 5.272242 | 5.528377 | 6.813271 | 6.598383 | 7.093249  |
| ENSMUSG Iqgap2    | 3.929535 | 4.550893 | 3.14603  | 4.555704 | 5.503235 | 4.816705  |
| ENSMUSG Arpc3     | 114.457  | 103.324  | 110.5861 | 115.4541 | 114.6191 | 116.39563 |
| ENSMUSG Gpn3      | 16.96178 | 19.23661 | 17.3935  | 15.60153 | 15.91517 | 14.991144 |
| ENSMUSG Atp2a2    | 49.96812 | 83.72231 | 55.65259 | 68.22572 | 67.0474  | 71.035224 |
| ENSMUSG Flcn      | 18.00062 | 16.38182 | 18.20406 | 16.58433 | 17.14259 | 16.867757 |
| ENSMUSG Fam168a   | 16.79937 | 17.36664 | 14.77353 | 14.05399 | 15.10649 | 14.429194 |
| ENSMUSG Fam216a   | 8.511999 | 9.829165 | 6.695893 | 12.07227 | 11.07567 | 11.33235  |
| ENSMUSG Atxn2l    | 29.49155 | 27.29776 | 32.25655 | 29.92704 | 31.88906 | 30.676799 |
| ENSMUSG 1700008Pc | 0        | 0        | 0        | 0        | 0        | 0         |
| ENSMUSG Smg7      | 12.34956 | 13.11836 | 12.20337 | 10.64593 | 11.01982 | 11.845151 |
| ENSMUSG Hebp1     | 23.88968 | 25.07533 | 26.32929 | 19.6783  | 25.48439 | 23.267529 |
| ENSMUSG Zfp715    | 10.0099  | 9.453963 | 8.295879 | 7.122327 | 7.510094 | 6.80446   |
| ENSMUSG Zbtb10    | 3.78178  | 3.302528 | 3.587512 | 2.286421 | 2.329298 | 2.013416  |
| ENSMUSG Olfr1353  | 0        | 0        | 0        | 0        | 0        | 0         |
| ENSMUSG Gpx7      | 5.935301 | 7.815882 | 6.36463  | 6.936831 | 6.155798 | 6.543961  |
| ENSMUSG Prps2     | 16.82418 | 18.76413 | 16.461   | 18.16566 | 17.81118 | 19.317522 |
| ENSMUSG Sdc3      | 52.90565 | 45.242   | 54.03325 | 39.77359 | 41.85582 | 41.243683 |
| ENSMUSG Vmn2r10   | 0.006955 | 0        | 0.006248 | 0.012873 | 0        | 0.020437  |
| ENSMUSG Il6       | 0.255142 | 0        | 0.05865  | 0.217224 | 0.107401 | 0.201943  |
| ENSMUSG Tyms      | 1.292088 | 1.496619 | 1.778576 | 1.736227 | 2.45354  | 2.776621  |
| ENSMUSG Tnfrsf1b  | 17.7083  | 14.62968 | 22.52089 | 27.45754 | 25.13555 | 26.920657 |
| ENSMUSG Olfr116   | 0        | 0        | 0        | 0        | 0        | 0         |
| ENSMUSG Stkld1    | 0        | 0.064954 | 0.058415 | 0.137359 | 0.199689 | 0.222696  |
| ENSMUSG Saa1      | 0.086451 | 0        | 0.139809 | 0.64406  | 0.53402  | 0.406783  |
| ENSMUSG Rasd1     | 1.751575 | 1.6179   | 1.188321 | 1.672867 | 1.963688 | 1.632647  |
| ENSMUSG Mrgpra9   | 0        | 0        | 0.080748 | 0.047894 | 0        | 0.064381  |
| ENSMUSG Gpr162    | 0.408174 | 0.3224   | 0.434903 | 0.683222 | 0.408896 | 0.755053  |
| ENSMUSG Txnip     | 316.8402 | 312.6838 | 288.8935 | 246.3404 | 304.3064 | 276.96402 |
| ENSMUSG Upf3a     | 16.55796 | 17.46357 | 17.87619 | 15.30562 | 13.56088 | 14.97514  |
| ENSMUSG Hemgn     | 0        | 0        | 0.085505 | 0.087855 | 0.059966 | 0.046768  |
| Mus_musc Mus_musc | 2.693859 | 3.517057 | 1.027696 | 899.7305 | 1130.389 | 494.23505 |
| ENSMUSG Ncbp1     | 13.40331 | 13.56504 | 15.29952 | 11.9815  | 13.44632 | 14.377018 |
| ENSMUSG Trmo      | 2.274016 | 2.33467  | 2.462464 | 1.990986 | 1.563461 | 2.226639  |
| ENSMUSG Coro2a    | 2.221998 | 2.261909 | 2.319985 | 5.190204 | 5.108296 | 5.885116  |
| ENSMUSG Nans      | 13.91925 | 14.29694 | 15.00524 | 22.00186 | 21.86293 | 21.900841 |
| ENSMUSG Col15a1   | 1.505469 | 1.28255  | 0.854058 | 2.91864  | 3.06876  | 3.512402  |
| ENSMUSG Cd3d      | 3.184557 | 2.495382 | 2.615637 | 3.970302 | 3.147677 | 3.852112  |
| ENSMUSG Arcn1     | 52.95422 | 54.48115 | 51.23237 | 52.63817 | 54.21437 | 53.525314 |

|                   |          |          |          |          |          |           |
|-------------------|----------|----------|----------|----------|----------|-----------|
| ENSMUSG Ddx6      | 60.53813 | 63.35929 | 52.48397 | 51.5085  | 52.22445 | 51.503992 |
| ENSMUSG Tmprss4   | 6.641898 | 7.685365 | 6.521054 | 11.37871 | 11.87732 | 13.627645 |
| ENSMUSG Mpzl2     | 4.487421 | 6.168643 | 3.083751 | 3.743428 | 3.510441 | 4.668741  |
| ENSMUSG Cd3e      | 3.93104  | 2.947814 | 3.796846 | 6.578156 | 4.391676 | 6.058367  |
| ENSMUSG Treh      | 0        | 0        | 0        | 0        | 0        | 0         |
| ENSMUSG Pate4     | 0        | 0        | 0        | 0        | 0        | 0         |
| ENSMUSG Vsir      | 22.64734 | 21.59607 | 26.70107 | 32.07258 | 29.36419 | 33.053812 |
| ENSMUSG Slc29a3   | 4.710555 | 4.271773 | 4.436947 | 10.16324 | 10.07524 | 11.438785 |
| ENSMUSG Slc16a7   | 5.610163 | 5.482955 | 3.874045 | 4.875251 | 4.993745 | 4.235763  |
| ENSMUSG Lrig3     | 2.66278  | 3.21452  | 2.745465 | 2.225011 | 2.400549 | 2.271921  |
| ENSMUSG Anapc16   | 22.81566 | 24.9829  | 26.52861 | 20.80681 | 23.11952 | 21.885633 |
| ENSMUSG Dnajb12   | 15.99224 | 15.66423 | 15.24736 | 14.92279 | 14.7766  | 14.719301 |
| ENSMUSG Ddit4     | 25.82084 | 35.83509 | 36.20528 | 18.99652 | 33.48846 | 25.883993 |
| ENSMUSG Mga       | 7.930348 | 8.208413 | 6.400952 | 6.889553 | 6.930496 | 6.734016  |
| ENSMUSG Dsc1      | 0        | 0        | 0        | 0        | 0        | 0         |
| ENSMUSG 1700001O  | 0.225818 | 0        | 0.196115 | 0.3319   | 0.354291 | 0.448238  |
| ENSMUSG Trp53i13  | 8.727268 | 8.745    | 8.964718 | 6.476545 | 7.109136 | 8.038792  |
| ENSMUSG AC154187  | 400.8321 | 468.5595 | 522.902  | 308.1151 | 319.2118 | 360.88849 |
| ENSMUSG Fsip2     | 0        | 0        | 0        | 0        | 0        | 0         |
| ENSMUSG AC153137  | 0.155398 | 0.006164 | 0.139617 | 0        | 0.03883  | 0.030444  |
| ENSMUSG Ly6g5b    | 0.272154 | 0.200896 | 0.246961 | 0.303303 | 0.28547  | 0.470222  |
| ENSMUSG Spata4    | 0        | 0        | 0        | 0        | 0        | 0         |
| ENSMUSG Gm12185   | 0.649109 | 0.615997 | 6.84558  | 3.304229 | 0.550182 | 0.831591  |
| ENSMUSG Slc25a47  | 1.957669 | 1.673132 | 1.024416 | 1.070444 | 0.964911 | 0.880525  |
| ENSMUSG Zfp420    | 2.813122 | 2.238306 | 3.027228 | 1.418331 | 1.942525 | 1.748571  |
| ENSMUSG Qrfpr     | 0        | 0        | 0        | 0        | 0.079286 | 0.113777  |
| ENSMUSG Txndc9    | 14.54922 | 14.58161 | 14.09614 | 15.99591 | 12.89263 | 15.206057 |
| ENSMUSG Ppp6r3    | 32.71848 | 33.26987 | 30.93762 | 29.18757 | 29.45724 | 28.401806 |
| ENSMUSG Tesmin    | 0.275921 | 0.274629 | 0.347911 | 0.153247 | 0.248617 | 0.286256  |
| ENSMUSG Gal       | 0.15502  | 0.574759 | 0.661746 | 0.260535 | 0        | 0         |
| ENSMUSG Mus81     | 8.468691 | 7.967942 | 8.041311 | 9.436878 | 8.513903 | 8.076931  |
| ENSMUSG Peli3     | 1.97632  | 2.290626 | 2.109308 | 2.585831 | 2.329409 | 1.955374  |
| ENSMUSG Cpt1a     | 50.32602 | 41.88651 | 31.71324 | 30.05366 | 34.36203 | 28.346811 |
| ENSMUSG Lao1      | 0        | 0        | 0        | 0        | 0        | 0         |
| ENSMUSG Mrpl11    | 3.99661  | 4.093639 | 3.640979 | 4.711206 | 4.346589 | 4.655272  |
| ENSMUSG Arhgef7   | 30.03196 | 28.00899 | 29.71261 | 24.50916 | 25.88054 | 25.287384 |
| ENSMUSG Tex29     | 0        | 0.06286  | 0        | 0        | 0        | 0         |
| ENSMUSG Rictor    | 6.730796 | 7.086047 | 6.258348 | 5.674848 | 5.714195 | 5.65536   |
| ENSMUSG Large1    | 6.288474 | 6.085457 | 6.28868  | 5.460961 | 5.626596 | 5.623695  |
| ENSMUSG Synpo2    | 4.392413 | 4.621838 | 3.967361 | 6.000234 | 6.018809 | 6.137308  |
| ENSMUSG Prickle1  | 39.19907 | 35.57897 | 31.82016 | 21.77188 | 20.04052 | 16.121343 |
| Mus_musc Mus_musc | 2.389869 | 2.187987 | 2.172008 | 1.813119 | 0.790986 | 1.246673  |
| Mus_musc Mus_musc | 0        | 0        | 0        | 0.200059 | 0        | 0.073299  |
| Mus_musc Mus_musc | 0.054357 | 0.178434 | 0.328238 | 0.261794 | 0.118037 | 0.060128  |
| Mus_musc Mus_musc | 0        | 0        | 0.168936 | 0        | 0        | 0         |
| Mus_musc Mus_musc | 1.183348 | 0.642796 | 0.833468 | 1.045888 | 1.192407 | 1.107536  |
| ENSMUSG Snx6      | 29.14192 | 30.49184 | 29.05893 | 26.61578 | 29.69138 | 27.861112 |
| ENSMUSG Mif       | 49.53384 | 38.13453 | 38.80035 | 53.01687 | 50.51091 | 56.261112 |
| ENSMUSG Sdccag8   | 4.777763 | 6.163653 | 5.197159 | 5.50348  | 5.954921 | 4.492607  |
| ENSMUSG Desi2     | 3.809765 | 3.536278 | 3.341449 | 3.809493 | 3.736335 | 3.93648   |
| ENSMUSG Cox20     | 15.60451 | 18.3171  | 22.41476 | 16.46411 | 17.19848 | 20.189381 |
| ENSMUSG Capn2     | 103.9928 | 97.29792 | 102.4369 | 68.24398 | 73.20201 | 71.57029  |
| ENSMUSG Gm21170   | 0        | 0        | 0        | 0        | 0        | 0         |
| ENSMUSG Ighv6-4   | 0        | 0        | 0        | 0.168692 | 0.418157 | 0.128885  |
| ENSMUSG Steap4    | 6.689092 | 9.203142 | 7.737436 | 20.3381  | 24.63978 | 21.179785 |
| ENSMUSG Zfp41     | 2.033506 | 1.424197 | 1.488301 | 1.722526 | 2.109876 | 1.735641  |
| ENSMUSG Msgn1     | 0        | 0        | 0        | 0        | 0        | 0         |
| ENSMUSG Tmem167   | 4.047221 | 4.518174 | 4.166222 | 5.381754 | 4.586766 | 4.930446  |
| ENSMUSG Rps25     | 257.7182 | 256.8419 | 204.2011 | 256.0736 | 228.0878 | 228.30381 |
| ENSMUSG Tcaf2     | 1.81471  | 1.394651 | 1.45228  | 2.473723 | 2.862035 | 2.772132  |
| ENSMUSG Epha1     | 8.952258 | 9.0607   | 10.24579 | 4.985004 | 5.352655 | 5.869181  |
| Mus_musc Mus_musc | 0        | 0        | 0        | 0        | 0.173026 | 0         |
| Mus_musc Mus_musc | 0        | 0        | 0        | 0.337601 | 0        | 0.310657  |
| Mus_musc Mus_musc | 0        | 0        | 0.08066  | 0.231962 | 0.070392 | 0         |

|                    |          |          |          |          |          |           |
|--------------------|----------|----------|----------|----------|----------|-----------|
| ENSMUSG Olfr1406   | 0        | 0        | 0        | 0        | 0        | 0         |
| ENSMUSG Pola1      | 1.973134 | 2.151858 | 1.831264 | 1.832898 | 2.43842  | 2.608116  |
| ENSMUSG Qrich1     | 24.94353 | 24.59525 | 24.81009 | 22.68735 | 26.27555 | 26.165722 |
| ENSMUSG Slc25a5    | 136.1924 | 150.2891 | 145.9769 | 180.6153 | 190.4814 | 193.38345 |
| ENSMUSG Usp19      | 32.36889 | 29.94405 | 31.08356 | 26.92279 | 27.36132 | 26.372898 |
| ENSMUSG P4htm      | 6.138652 | 5.333082 | 4.985463 | 3.116273 | 3.576938 | 2.730308  |
| ENSMUSG Npm2       | 0.201607 | 0.188505 | 0.12522  | 0        | 0.002487 | 0.187142  |
| ENSMUSG Pcdhb16    | 1.206208 | 1.084861 | 1.033243 | 0.910513 | 1.2828   | 0.877749  |
| ENSMUSG Lenep      | 0.315518 | 0.062232 | 0.367196 | 0.248302 | 0.130426 | 0.239632  |
| ENSMUSG Rnf148     | 0.005767 | 0.245226 | 0        | 0.042135 | 0.039177 | 0         |
| Mus_musc Mus_musc  | 0        | 0        | 0.267028 | 0        | 0        | 0.207358  |
| Mus_musc Mus_musc  | 18.11534 | 12.34707 | 42.13132 | 39.40646 | 36.34589 | 30.401588 |
| Mus_musc Mus_musc  | 0.143095 | 0.204394 | 0.291206 | 0.220491 | 0.504227 | 0.158906  |
| ENSMUSG Cacybp     | 23.94721 | 38.82658 | 35.79192 | 26.0228  | 27.05936 | 30.01494  |
| ENSMUSG mt-Nd2     | 1429.524 | 1491.914 | 1277.36  | 1297.088 | 1301.66  | 1122.0155 |
| ENSMUSG mt-Nd1     | 1624.122 | 1681.142 | 1484.863 | 1579.466 | 1599.937 | 1391.0569 |
| ENSMUSG Ell2       | 7.207693 | 7.747755 | 6.472294 | 20.31649 | 20.93902 | 19.26974  |
| ENSMUSG Arl6ip1    | 114.1533 | 112.9575 | 110.3382 | 116.8989 | 120.8644 | 121.39538 |
| ENSMUSG Zfp560     | 2.460734 | 2.08377  | 2.642745 | 2.332836 | 1.822088 | 2.286717  |
| ENSMUSG Onecut3    | 0        | 0        | 0        | 0        | 0        | 0         |
| ENSMUSG Pou3f3     | 0.015227 | 0.020973 | 0.025583 | 0.019964 | 0.03946  | 0.007458  |
| ENSMUSG Olfr460    | 0        | 0        | 0        | 0        | 0        | 0         |
| ENSMUSG Ccdc70     | 0        | 0        | 0        | 0        | 0        | 0         |
| ENSMUSG Art2b      | 0.421869 | 0.056929 | 0.102132 | 0.36257  | 0.193911 | 0.293171  |
| ENSMUSG Mymk       | 0.093472 | 0.116123 | 0.036672 | 0.570148 | 0.280714 | 0.681933  |
| ENSMUSG Fam163b    | 0.01703  | 0.019921 | 0.047444 | 0.039461 | 0.028392 | 0.017944  |
| ENSMUSG Prr29      | 2.887032 | 4.482722 | 1.928891 | 4.379139 | 5.601199 | 4.602864  |
| ENSMUSG Gm45837    | 2.883507 | 2.395274 | 1.409004 | 7.056373 | 2.487047 | 5.588636  |
| ENSMUSG Nkx2-5     | 0        | 0.132288 | 0        | 0.171206 | 0.066253 | 0.068964  |
| ENSMUSG Atp6v0e    | 95.7473  | 93.32838 | 106.0608 | 122.9887 | 117.1033 | 131.65829 |
| ENSMUSG Gm5155     | 0        | 0        | 0        | 0        | 0        | 0         |
| ENSMUSG Ceacam15   | 0        | 0        | 0        | 0        | 0.080529 | 0         |
| ENSMUSG Dact3      | 2.987649 | 2.600929 | 3.705009 | 2.24882  | 2.821465 | 2.56006   |
| ENSMUSG Zfp541     | 0        | 0        | 0.029985 | 0        | 0        | 0         |
| ENSMUSG Sult2a5    | 0        | 0        | 0        | 0        | 0        | 0         |
| ENSMUSG Sult2a1    | 0        | 0        | 0        | 0.049646 | 0        | 0         |
| Mus_musc Mus_musc  | 0        | 0.036061 | 0        | 0.052016 | 0.197515 | 0.384722  |
| Mus_musc Mus_musc  | 0.862339 | 1.417409 | 1.719539 | 0.545057 | 0.79423  | 0.492051  |
| Mus_musc Mus_musc  | 0        | 0.305958 | 0        | 0        | 0        | 0         |
| Mus_musc Mus_musc  | 0        | 0        | 0        | 0.13012  | 0.216967 | 0         |
| Mus_musc Mus_musc  | 0        | 0        | 0        | 0        | 0.232479 | 0         |
| ENSMUSG Olfr404-ps | 0        | 0        | 0        | 0        | 0        | 0         |
| ENSMUSG Ccr5       | 0.894606 | 0.755828 | 2.389999 | 7.451678 | 7.201183 | 8.409477  |
| Mus_musc Mus_musc  | 0.270221 | 0.216764 | 0.409751 | 0.608049 | 0.397955 | 0.564832  |
| Mus_musc Mus_musc  | 0        | 0        | 0        | 0        | 0.307514 | 0.143179  |
| ENSMUSG Slc38a3    | 0.047762 | 0        | 0        | 0        | 0.061915 | 0         |
| ENSMUSG Rassf1     | 41.67254 | 41.31253 | 50.20629 | 28.76931 | 28.80542 | 31.966616 |
| ENSMUSG Cacna2d2   | 0.060648 | 0.106631 | 0.017804 | 0.133105 | 0.076078 | 0.110949  |
| ENSMUSG Myo18a     | 26.21687 | 26.07341 | 26.87123 | 23.74116 | 23.35356 | 25.747775 |
| ENSMUSG Lilrb4a    | 11.00469 | 7.946033 | 11.47887 | 39.1437  | 42.24155 | 46.421306 |
| ENSMUSG Olfr650-ps | 0        | 0        | 0        | 0        | 0        | 0         |
| ENSMUSG Olfr800    | 0        | 0        | 0        | 0        | 0        | 0         |
| ENSMUSG Vmn1r23    | 0        | 0        | 0        | 0        | 0        | 0         |
| ENSMUSG Olfr206    | 0        | 0        | 0        | 0        | 0        | 0         |
| ENSMUSG Oxct2a     | 0        | 0        | 0        | 0        | 0        | 0.036     |
| ENSMUSG Trim12a    | 0.068694 | 0.024218 | 0        | 0        | 0.089768 | 0.059102  |
| ENSMUSG Olfr949-ps | 0        | 0        | 0        | 0        | 0        | 0         |
| ENSMUSG Hus1b      | 0        | 0        | 0.032449 | 0.040169 | 0.047184 | 0.132825  |
| ENSMUSG Psmb1      | 50.14761 | 50.89257 | 52.79    | 58.3997  | 56.00447 | 59.043706 |
| ENSMUSG Fam120b    | 11.04536 | 11.19269 | 9.993606 | 8.732658 | 8.60865  | 8.516878  |
| ENSMUSG Tbp        | 4.940842 | 3.690477 | 3.996638 | 4.354865 | 3.281607 | 3.892629  |
| Mus_musc Mus_musc  | 0        | 0        | 0.168936 | 0        | 0        | 0         |
| Mus_musc Mus_musc  | 0        | 0.311608 | 0.14791  | 0        | 0.072914 | 0         |
| ENSMUSG Cmc4       | 5.768785 | 4.665212 | 6.741979 | 5.214209 | 5.038721 | 3.246276  |

|                    |          |          |          |          |          |           |
|--------------------|----------|----------|----------|----------|----------|-----------|
| ENSMUSG Nhlrc4     | 1.575677 | 1.338438 | 0.96232  | 2.238366 | 1.880695 | 1.919571  |
| ENSMUSG Shprh      | 6.324736 | 6.275017 | 5.516031 | 4.893481 | 4.549557 | 4.580382  |
| ENSMUSG Usp49      | 2.000488 | 2.106289 | 2.039697 | 2.027641 | 1.896959 | 2.184075  |
| Mus_musc Mus_musc  | 1.096794 | 0.991386 | 1.384848 | 1.740664 | 1.42882  | 1.191155  |
| Mus_musc Mus_musc  | 0        | 0        | 0        | 0.074299 | 0        | 0.060016  |
| ENSMUSG Khl25      | 9.005665 | 11.0796  | 10.98246 | 8.232064 | 8.373182 | 7.996509  |
| ENSMUSG Scgb3a2    | 423.6522 | 547.9649 | 284.772  | 248.4637 | 150.18   | 183.76152 |
| ENSMUSG Lefty1     | 2.060975 | 1.489894 | 1.520738 | 1.498634 | 1.464901 | 1.879894  |
| ENSMUSG Slc6a7     | 0        | 0        | 0        | 0        | 0        | 0         |
| ENSMUSG Pidd1      | 0.35848  | 0.644304 | 0.755572 | 1.07915  | 0.952331 | 1.160409  |
| ENSMUSG Eps8l2     | 28.4024  | 25.50764 | 25.0046  | 17.46915 | 18.58593 | 17.249842 |
| ENSMUSG Tmem80     | 9.786551 | 8.915001 | 8.698927 | 8.68861  | 7.953688 | 7.259646  |
| ENSMUSG Taldo1     | 101.1482 | 97.44544 | 101.658  | 103.9075 | 100.2071 | 101.69484 |
| ENSMUSG Tmem91     | 0.122635 | 0.213159 | 0        | 0.101625 | 0        | 0.217579  |
| ENSMUSG Sgk2       | 0.045613 | 0.18925  | 0.103901 | 0        | 0.01846  | 0         |
| ENSMUSG Rplp2      | 170.769  | 172.4063 | 186.5539 | 200.4529 | 185.395  | 202.48634 |
| ENSMUSG Pnpla2     | 74.09387 | 77.34362 | 74.20808 | 52.4135  | 63.73409 | 60.242351 |
| ENSMUSG Zfp981     | 0        | 0.019555 | 0        | 0        | 0        | 0         |
| ENSMUSG Sertm1     | 0        | 0        | 0        | 0        | 0        | 0         |
| ENSMUSG Usp39      | 24.58779 | 19.35525 | 20.16288 | 14.79907 | 15.81201 | 19.5567   |
| ENSMUSG Igf2r      | 9.743624 | 9.288412 | 9.318263 | 12.13686 | 12.71189 | 13.562683 |
| ENSMUSG Acat2      | 15.6184  | 16.81817 | 14.963   | 22.0306  | 20.62872 | 24.058422 |
| ENSMUSG Olfr328    | 0        | 0        | 0        | 0        | 0        | 0         |
| ENSMUSG Krtap19-2  | 0        | 0        | 0        | 0        | 0        | 0         |
| Mus_musc Mus_musc  | 0        | 0.272493 | 0.137506 | 0.310531 | 0.070625 | 0         |
| ENSMUSG Rab7b      | 2.737013 | 2.334917 | 2.31661  | 5.333055 | 4.637169 | 6.32508   |
| Mus_musc Mus_musc  | 1.089479 | 1.210041 | 1.374915 | 0.772075 | 1.061209 | 1.119951  |
| ENSMUSG Rap1b      | 103.7182 | 94.56197 | 103.6269 | 84.91415 | 85.89248 | 88.766644 |
| ENSMUSG Jun        | 171.6337 | 124.5402 | 154.9479 | 73.75698 | 85.71227 | 84.601547 |
| ENSMUSG Scgb1c1    | 14.37387 | 13.76812 | 7.293215 | 8.455273 | 8.903378 | 5.337353  |
| ENSMUSG Ugt2b1     | 0        | 0        | 0        | 0        | 0        | 0         |
| ENSMUSG Plppr3     | 1.496188 | 1.918413 | 2.579015 | 1.773555 | 1.452559 | 1.591305  |
| ENSMUSG Polr3g     | 3.040939 | 3.116457 | 2.901856 | 2.597633 | 2.261794 | 2.914033  |
| ENSMUSG Six3       | 0        | 0        | 0        | 0        | 0        | 0         |
| ENSMUSG Rap1gap2   | 2.394131 | 2.485718 | 3.81213  | 2.95927  | 2.209031 | 2.927337  |
| ENSMUSG Sde2       | 10.93707 | 9.391061 | 10.63719 | 9.018077 | 8.554932 | 8.247251  |
| ENSMUSG Atp6v1e2   | 0        | 0        | 0        | 0        | 0        | 0         |
| ENSMUSG Spata22    | 0        | 0        | 0        | 0        | 0        | 0         |
| ENSMUSG 2700081O   | 11.10798 | 10.38202 | 11.07038 | 7.541475 | 7.360589 | 8.714903  |
| Mus_musc Mus_musc  | 1.517663 | 2.206153 | 1.136253 | 1.346876 | 1.439695 | 1.271198  |
| ENSMUSG Cyp2f2     | 1322.24  | 1450.558 | 853.8739 | 572.7224 | 550.1058 | 566.66437 |
| ENSMUSG Vmn2r57    | 0.024063 | 0.095544 | 0.066346 | 0.105476 | 0.079166 | 0.065451  |
| ENSMUSG Zfp467     | 12.4835  | 14.81296 | 12.23127 | 10.53336 | 10.82134 | 12.743554 |
| ENSMUSG Junb       | 79.8961  | 45.79915 | 56.41179 | 46.58862 | 42.30455 | 48.864231 |
| ENSMUSG Flt3l      | 11.29272 | 11.17333 | 17.23532 | 11.99839 | 11.38678 | 12.702201 |
| ENSMUSG Olfr501-ps | 0        | 0        | 0        | 0        | 0        | 0         |
| ENSMUSG Ccdc153    | 24.26102 | 29.06905 | 17.26945 | 41.04636 | 36.4037  | 36.102884 |
| ENSMUSG Socs2      | 37.4011  | 33.8794  | 28.38613 | 32.19289 | 33.4035  | 32.91726  |
| ENSMUSG Scn2b      | 0.115218 | 0.214495 | 0.331341 | 0.241552 | 0.290624 | 0.253454  |
| ENSMUSG Pcdhga7    | 1.347079 | 1.669014 | 1.319504 | 1.140612 | 0.728606 | 0.994993  |
| ENSMUSG Ndufa12    | 22.88445 | 27.30303 | 35.17364 | 30.23521 | 24.95338 | 40.15269  |
| ENSMUSG Tmcc3      | 31.58285 | 29.98346 | 29.61251 | 21.69485 | 21.34388 | 19.822526 |
| ENSMUSG Usp44      | 0.082    | 0        | 0        | 0.076243 | 0        | 0.213668  |
| ENSMUSG Fgd6       | 5.617143 | 6.102586 | 5.393881 | 5.749618 | 6.200627 | 6.073743  |
| ENSMUSG Nudt4      | 35.5165  | 40.27843 | 34.58788 | 35.25797 | 35.41007 | 33.740303 |
| ENSMUSG Cpb2       | 0        | 0        | 0        | 0        | 0        | 0         |
| ENSMUSG Lcp1       | 74.19152 | 71.12559 | 76.69634 | 112.8585 | 100.795  | 108.09741 |
| ENSMUSG Wnt5a      | 2.533562 | 2.528338 | 2.132572 | 3.128151 | 2.784296 | 2.717658  |
| ENSMUSG Lrrc63     | 0        | 0.056831 | 0        | 0.105779 | 0.161029 | 0.079543  |
| ENSMUSG Esd        | 28.59395 | 30.59415 | 38.22656 | 40.67492 | 37.93581 | 46.365998 |
| ENSMUSG Cacna2d3   | 0.092627 | 0.132552 | 0.065883 | 0.066781 | 0.02976  | 0.090373  |
| ENSMUSG Spata13    | 6.745607 | 5.623538 | 7.640361 | 6.726296 | 7.251878 | 7.104543  |
| ENSMUSG Mipep      | 4.269642 | 4.988898 | 3.938783 | 4.278231 | 4.650667 | 4.635392  |
| ENSMUSG Olfr1389   | 0        | 0        | 0        | 0        | 0        | 0         |

|                   |          |          |          |          |          |           |
|-------------------|----------|----------|----------|----------|----------|-----------|
| ENSMUSG Ptprf     | 70.22579 | 71.28691 | 56.39614 | 58.32412 | 55.91909 | 64.41441  |
| ENSMUSG Noc4l     | 5.208833 | 5.617106 | 6.222835 | 6.961066 | 5.545078 | 6.689023  |
| ENSMUSG Scgb1b30  | 0        | 0        | 0        | 0.101362 | 0        | 0         |
| Mus_musc Mus_musc | 0.351077 | 0.491269 | 0.634503 | 0.301211 | 0.403112 | 0.670672  |
| ENSMUSG Srrm3     | 0.013533 | 0        | 0        | 0.035892 | 0        | 0         |
| ENSMUSG Slc44a3   | 17.29498 | 18.29728 | 13.98801 | 14.48877 | 16.18715 | 14.899261 |
| ENSMUSG Vmn2r77   | 0        | 0        | 0        | 0        | 0        | 0         |
| ENSMUSG Ccdc71l   | 6.414976 | 6.469344 | 5.4358   | 6.642656 | 7.744298 | 6.327015  |
| ENSMUSG F830016B  | 0.749845 | 0.574366 | 2.427362 | 2.590292 | 0.876893 | 1.296231  |
| ENSMUSG Tmprss11e | 0        | 0        | 0        | 0        | 0        | 0         |
| ENSMUSG Rexo5     | 1.386989 | 1.488601 | 0.936259 | 1.211601 | 0.88597  | 0.945713  |
| ENSMUSG Lyrm1     | 1.527285 | 2.344855 | 1.859917 | 2.074249 | 1.728103 | 1.973969  |
| ENSMUSG Trim30a   | 10.28316 | 9.333646 | 14.37352 | 11.28737 | 9.410176 | 8.957879  |
| ENSMUSG Eri2      | 1.23296  | 1.89724  | 1.127213 | 1.046071 | 1.254505 | 1.425126  |
| ENSMUSG Hars2     | 6.794065 | 7.414474 | 7.432827 | 6.521388 | 6.524632 | 5.825119  |
| ENSMUSG Cacng2    | 0        | 0        | 0        | 0        | 0        | 0         |
| ENSMUSG Dpep1     | 35.66898 | 34.75644 | 43.00003 | 43.03674 | 41.07275 | 37.346617 |
| ENSMUSG Cdh8      | 0        | 0        | 0        | 0        | 0        | 0         |
| ENSMUSG Commd2    | 11.34203 | 12.33218 | 12.2962  | 8.875    | 11.43558 | 10.983475 |
| ENSMUSG St18      | 0.034211 | 0.046408 | 0        | 0.152249 | 0.132637 | 0.0749    |
| ENSMUSG Alkal1    | 1.539689 | 2.139591 | 2.242623 | 2.425205 | 3.352483 | 2.788022  |
| ENSMUSG Tuba1a    | 225.8582 | 195.9788 | 231.3273 | 180.7459 | 182.1187 | 202.8033  |
| ENSMUSG Syt9      | 0.24616  | 0.131509 | 0.140478 | 0.331086 | 0.18816  | 0.286538  |
| ENSMUSG 2310079G  | 0        | 0        | 0        | 0        | 0        | 0         |
| ENSMUSG Tlr12     | 1.222411 | 0.764018 | 0.856379 | 1.391253 | 0.887097 | 1.553959  |
| ENSMUSG Gm4788    | 0        | 0        | 0        | 0.206422 | 0        | 0         |
| Mus_musc Mus_musc | 0        | 0        | 0        | 0.327657 | 0        | 0         |
| ENSMUSG Fbxw11    | 27.28762 | 27.54757 | 25.61602 | 24.12109 | 23.86064 | 24.450758 |
| ENSMUSG Cep76     | 3.159391 | 2.68901  | 2.782798 | 2.717608 | 3.61744  | 3.103693  |
| ENSMUSG St8sia6   | 0.704414 | 0.847425 | 0.385506 | 4.09332  | 3.7598   | 3.333679  |
| ENSMUSG Pdcl3     | 11.94097 | 11.15129 | 13.23823 | 9.337452 | 9.952433 | 9.000421  |
| ENSMUSG Elavl3    | 0.020326 | 0        | 0        | 0.010238 | 0        | 0.010029  |
| ENSMUSG Rab3b     | 0.151126 | 0.10588  | 0.030466 | 0.152297 | 0.084733 | 0.195206  |
| ENSMUSG Map4k4    | 39.48232 | 41.38078 | 38.04632 | 36.40063 | 35.44135 | 37.040306 |
| ENSMUSG Il1r2     | 1.397394 | 0.97006  | 1.548515 | 0.802556 | 1.04693  | 0.714939  |
| ENSMUSG Il1r1     | 9.984153 | 9.467402 | 8.995237 | 8.065669 | 7.566255 | 9.317198  |
| ENSMUSG Il18r1    | 23.67111 | 29.55853 | 27.7493  | 31.05889 | 25.21448 | 27.550331 |
| ENSMUSG Plbd1     | 12.41531 | 14.09262 | 15.08239 | 24.41269 | 21.97931 | 25.43099  |
| ENSMUSG Wbp11     | 21.60038 | 22.86528 | 23.27779 | 21.12932 | 20.33692 | 21.254847 |
| ENSMUSG Art4      | 5.723193 | 6.243057 | 5.560194 | 5.462738 | 5.537575 | 4.737472  |
| ENSMUSG Gm26741   | 0        | 0        | 0        | 0        | 0        | 0         |
| ENSMUSG Atf7ip    | 14.89277 | 14.13182 | 13.00524 | 12.62361 | 12.99048 | 12.494454 |
| ENSMUSG Strada    | 6.807185 | 6.907935 | 7.445229 | 7.730859 | 7.082057 | 7.679874  |
| ENSMUSG Pex11g    | 1.65599  | 1.362492 | 1.471157 | 2.063554 | 1.870761 | 2.16544   |
| ENSMUSG Mgp       | 242.7142 | 247.4969 | 238.1653 | 268.5829 | 256.2404 | 320.32376 |
| ENSMUSG Erp27     | 0        | 0        | 0.107042 | 0        | 0        | 0         |
| ENSMUSG Rps23     | 244.9455 | 248.5089 | 280.3572 | 289.2635 | 261.7373 | 274.93137 |
| ENSMUSG Spty2d1   | 8.498891 | 8.683833 | 8.044991 | 9.369385 | 8.441297 | 9.336864  |
| ENSMUSG Espnl     | 0.030147 | 0.017004 | 0.007384 | 0.08076  | 0.030858 | 0.039983  |
| ENSMUSG Tigar     | 3.597153 | 4.229201 | 4.117598 | 3.254587 | 3.197733 | 4.132453  |
| ENSMUSG Htr1b     | 0.850983 | 0.764858 | 0.681897 | 0.79086  | 0.659287 | 0.624859  |
| ENSMUSG Atp6v0a2  | 16.25051 | 17.14134 | 16.2644  | 17.95017 | 18.8043  | 19.168152 |
| ENSMUSG Mindy4    | 4.84608  | 5.066527 | 3.95092  | 3.213683 | 3.755796 | 3.287877  |
| ENSMUSG Rapgef1   | 0.594419 | 0.586414 | 0.519799 | 0.636427 | 0.660518 | 0.768954  |
| ENSMUSG Kcnj9     | 0.020378 | 0.035287 | 0        | 0        | 0.01152  | 0         |
| ENSMUSG Phf2      | 25.94512 | 26.70542 | 25.27807 | 19.28612 | 20.26704 | 19.941677 |
| ENSMUSG Dennd4c   | 11.59364 | 13.08083 | 9.547638 | 11.6115  | 13.16746 | 12.803298 |
| Mus_musc Mus_musc | 0.35296  | 0        | 0        | 0.380103 | 0.140179 | 0.152755  |
| ENSMUSG Gm12794   | 0        | 0        | 0        | 0        | 0        | 0         |
| ENSMUSG Gm12689   | 0.115116 | 0.112297 | 0.06924  | 0.186949 | 0.181335 | 0.157758  |
| ENSMUSG Ptger4    | 2.324103 | 1.886907 | 2.599154 | 4.034329 | 4.597075 | 4.455776  |
| ENSMUSG Olfr293   | 0        | 0        | 0        | 0        | 0        | 0         |
| ENSMUSG Rad21     | 46.03853 | 45.13431 | 44.44048 | 38.41375 | 41.80352 | 39.034729 |
| ENSMUSG Slc30a8   | 0        | 0        | 0        | 0        | 0        | 0         |



|                   |          |          |          |          |          |           |
|-------------------|----------|----------|----------|----------|----------|-----------|
| ENSMUSG Eif3h     | 133.7073 | 148.1582 | 144.9504 | 142.2063 | 140.678  | 150.88864 |
| ENSMUSG Utp23     | 4.732236 | 4.209459 | 5.088442 | 4.323162 | 3.902764 | 4.059346  |
| ENSMUSG Csm3      | 0        | 0        | 0        | 0        | 0        | 0         |
| ENSMUSG Tubg1     | 10.94688 | 9.083414 | 11.35914 | 11.39748 | 10.46057 | 10.708202 |
| ENSMUSG Arl6ip5   | 60.21883 | 59.07391 | 71.09435 | 67.43114 | 66.58405 | 68.159767 |
| ENSMUSG Rfp14     | 0        | 0        | 0        | 0        | 0        | 0         |
| ENSMUSG 1700001FC | 0        | 0        | 0        | 0        | 0        | 0         |
| ENSMUSG Pde7a     | 8.802954 | 9.652219 | 8.584541 | 8.383105 | 8.571054 | 7.240468  |
| ENSMUSG Smim9     | 0        | 0        | 0        | 0        | 0        | 0         |
| ENSMUSG Ctxn1     | 6.499496 | 7.054684 | 5.540325 | 8.050545 | 8.349092 | 7.89691   |
| ENSMUSG Scand1    | 25.10793 | 6.326972 | 7.106887 | 6.724644 | 21.42216 | 19.091654 |
| ENSMUSG Exd1      | 0.60177  | 0.731416 | 0.59305  | 0.535932 | 0.509916 | 0.559235  |
| ENSMUSG Slc20a2   | 5.815199 | 6.15507  | 5.258446 | 6.280839 | 5.947758 | 5.532468  |
| ENSMUSG Mmp3      | 4.276593 | 3.635778 | 3.886423 | 3.616898 | 4.359903 | 2.695092  |
| ENSMUSG Plaur     | 34.78706 | 33.37401 | 48.00136 | 37.65379 | 42.746   | 40.284241 |
| ENSMUSG Vps37d    | 0.722411 | 0.667008 | 0.833302 | 0.75502  | 0.888693 | 0.592283  |
| ENSMUSG Tcl1b3    | 0        | 0        | 0        | 0        | 0        | 0         |
| ENSMUSG Olfr366   | 0        | 0        | 0        | 0        | 0        | 0         |
| ENSMUSG Uckl1     | 11.53214 | 13.70627 | 14.27826 | 14.39827 | 12.14247 | 13.358723 |
| ENSMUSG Mfsd14a   | 27.27345 | 27.71091 | 26.12165 | 25.25292 | 25.58947 | 24.917875 |
| ENSMUSG Mms22l    | 1.205864 | 1.227619 | 0.760089 | 1.653477 | 1.640531 | 1.901455  |
| ENSMUSG Tssc4     | 14.81149 | 17.47076 | 18.75599 | 15.14735 | 19.98356 | 20.370978 |
| ENSMUSG Zfp764    | 5.681354 | 5.664333 | 5.328883 | 4.128427 | 3.972053 | 3.931289  |
| ENSMUSG Nup54     | 7.43562  | 8.253347 | 8.460347 | 7.353041 | 6.95543  | 9.018113  |
| ENSMUSG Nrip3     | 0.090257 | 0.148375 | 0.18081  | 0.176232 | 0.134873 | 0.182357  |
| ENSMUSG Cpsf7     | 16.57444 | 15.04239 | 16.36826 | 14.10568 | 13.84216 | 13.122432 |
| ENSMUSG Nxn1      | 0        | 0.229655 | 0.044678 | 0.155924 | 0.039481 | 0.072797  |
| ENSMUSG Gypc      | 6.657236 | 7.057295 | 7.883254 | 5.969167 | 5.951804 | 6.056719  |
| ENSMUSG Ccdc112   | 1.859437 | 1.826425 | 1.578688 | 1.574035 | 1.429419 | 1.519915  |
| ENSMUSG Mcc       | 9.064368 | 10.42167 | 10.13613 | 5.708345 | 5.584919 | 5.164178  |
| ENSMUSG Gm94      | 0        | 0        | 0        | 0        | 0        | 0         |
| ENSMUSG Gm5538    | 0        | 0        | 0        | 0        | 0        | 0         |
| ENSMUSG Isl1      | 0.020253 | 0.058265 | 0        | 0        | 0        | 0         |
| ENSMUSG Cilp      | 0.053788 | 0.117079 | 0.128136 | 1.998835 | 1.526377 | 1.281588  |
| ENSMUSG Ptchd4    | 0        | 0.015519 | 0        | 0.024706 | 0.086145 | 0.063807  |
| ENSMUSG Pm20d1    | 0.54228  | 0.830609 | 0.551943 | 0.916535 | 0.730346 | 0.765942  |
| ENSMUSG Pglyrp4   | 0        | 0.062305 | 0.038426 | 0.018815 | 0.070606 | 0         |
| ENSMUSG Arid1a    | 23.39495 | 23.09392 | 23.23311 | 20.26435 | 21.53002 | 21.449499 |
| ENSMUSG Crlf1     | 6.177816 | 5.110978 | 5.800141 | 4.644453 | 3.497415 | 5.110888  |
| ENSMUSG Olfr1112  | 0        | 0        | 0        | 0        | 0        | 0         |
| ENSMUSG Kik1b11   | 0        | 0        | 0        | 0        | 0.096483 | 0         |
| ENSMUSG Tmem86b   | 1.409053 | 1.774971 | 2.820554 | 2.186861 | 1.395413 | 1.675183  |
| ENSMUSG Gpr20     | 0.07744  | 0.115948 | 0.078023 | 0        | 0        | 0.111594  |
| ENSMUSG Rtn4rl1   | 4.734712 | 4.103445 | 5.115962 | 3.339926 | 3.862334 | 4.345541  |
| Mus_musc Mus_musc | 4.155163 | 10.11833 | 1.020851 | 974.4338 | 155.6228 | 394.75861 |
| ENSMUSG Dcaf12l1  | 0.25855  | 0.326058 | 0.261276 | 0.195092 | 0.162006 | 0.192952  |
| ENSMUSG Ush1g     | 0        | 0        | 0        | 0        | 0.013683 | 0         |
| ENSMUSG Gm6268    | 0        | 0        | 0        | 0        | 0        | 0         |
| ENSMUSG Cpne5     | 0.764504 | 0.896182 | 0.830168 | 0.253464 | 0.114312 | 0.396832  |
| ENSMUSG Stk38     | 23.73348 | 23.72673 | 24.61045 | 27.28955 | 26.6844  | 28.595891 |
| ENSMUSG Ppil1     | 10.37285 | 10.65935 | 10.8595  | 10.07742 | 12.18965 | 11.791638 |
| ENSMUSG Brd4      | 18.77183 | 18.78367 | 18.33625 | 17.42462 | 15.00658 | 16.172426 |
| ENSMUSG Bclaf3    | 3.186563 | 3.938416 | 3.732455 | 4.168995 | 3.237332 | 3.719758  |
| ENSMUSG Lsm8      | 17.94943 | 17.1835  | 19.54271 | 17.84357 | 16.01456 | 17.737068 |
| ENSMUSG Hepacam2  | 1.407853 | 1.543116 | 1.332175 | 3.279487 | 3.341182 | 2.872658  |
| Mus_musc Mus_musc | 0.131897 | 0.113719 | 0.199918 | 0        | 0.486803 | 0         |
| ENSMUSG 7-Sep     | 82.37314 | 84.58717 | 88.0946  | 71.92531 | 70.78976 | 65.543938 |
| ENSMUSG Gm3402    | 0        | 0        | 0        | 0        | 0        | 0         |
| ENSMUSG Rrp9      | 10.09638 | 8.512647 | 9.711002 | 7.847185 | 6.195278 | 7.455943  |
| Mus_musc Mus_musc | 7.149322 | 1.744448 | 0.617647 | 50.65123 | 4.081591 | 49.390305 |
| ENSMUSG Slc23a1   | 2.585229 | 2.602103 | 1.830591 | 1.553104 | 2.00429  | 1.958594  |
| ENSMUSG Sil1      | 20.7241  | 18.32671 | 17.38956 | 18.38736 | 17.92082 | 17.997915 |
| Mus_musc Mus_musc | 0        | 0        | 0.166939 | 0        | 0        | 0         |
| Mus_musc Mus_musc | 1.799231 | 1.249804 | 1.596072 | 1.234657 | 1.258075 | 1.452349  |

|                   |          |          |          |          |          |           |
|-------------------|----------|----------|----------|----------|----------|-----------|
| Mus_musc Mus_musc | 0        | 0.272339 | 0        | 0        | 0        | 0         |
| Mus_musc Mus_musc | 0.327549 | 0.09329  | 0.474263 | 0        | 0.196027 | 0         |
| Mus_musc Mus_musc | 0.607819 | 0.04942  | 0.141658 | 0.122069 | 0        | 0         |
| Mus_musc Mus_musc | 0.108535 | 0.042182 | 0.207175 | 0.168951 | 0        | 0         |
| Mus_musc Mus_musc | 0.42511  | 0.462117 | 0.223991 | 0.054825 | 0.110848 | 0.21572   |
| Mus_musc Mus_musc | 0        | 0        | 0        | 0        | 0        | 0         |
| Mus_musc Mus_musc | 1.252085 | 0.807696 | 1.140285 | 0.885356 | 0.54719  | 0.826719  |
| ENSMUSG Mthfd1l   | 4.174549 | 3.651307 | 2.864939 | 2.993946 | 3.611909 | 3.389518  |
| ENSMUSG Ssrp1     | 37.50112 | 38.14129 | 38.11759 | 38.05928 | 35.12322 | 36.976663 |
| ENSMUSG Commd3    | 29.72327 | 29.17578 | 30.53803 | 38.0431  | 31.05972 | 34.052887 |
| ENSMUSG Tas2r105  | 0        | 0        | 0        | 0        | 0        | 0         |
| ENSMUSG Dhrr9     | 0.658922 | 0.831922 | 0.748986 | 2.068317 | 2.084273 | 2.490408  |
| ENSMUSG Pxmp4     | 14.62429 | 14.78386 | 13.97745 | 13.25641 | 14.00422 | 13.467747 |
| ENSMUSG Pam       | 69.25691 | 71.91798 | 64.04899 | 46.70717 | 47.88853 | 43.700449 |
| ENSMUSG Slco6d1   | 0        | 0        | 0        | 0        | 0        | 0         |
| Mus_musc Mus_musc | 0.307674 | 0.219506 | 0.6355   | 1.247363 | 0.855389 | 1.390683  |
| ENSMUSG Fam173a   | 29.87534 | 30.22807 | 33.30175 | 25.84764 | 25.19637 | 32.186546 |
| ENSMUSG Slco6c1   | 0        | 0        | 0        | 0        | 0        | 0         |
| ENSMUSG Gin1      | 2.997775 | 3.181674 | 2.461222 | 3.103405 | 2.246571 | 2.265321  |
| Mus_musc Mus_musc | 0        | 0        | 0        | 0        | 0        | 0         |
| Mus_musc Mus_musc | 1.247212 | 1.51512  | 0.603902 | 1.037452 | 0.787363 | 0.694614  |
| Mus_musc Mus_musc | 0.607662 | 0.340272 | 2.421103 | 0.69696  | 0.227773 | 0.314877  |
| Mus_musc Mus_musc | 0.247481 | 0.252287 | 0.419477 | 0.286548 | 0.378861 | 0.325011  |
| Mus_musc Mus_musc | 0        | 0        | 0        | 0        | 0        | 0         |
| Mus_musc Mus_musc | 0        | 0.224722 | 0.111062 | 0.143364 | 0        | 0.261913  |
| ENSMUSG Vmn1r158  | 0        | 0        | 0        | 0        | 0        | 0         |
| ENSMUSG Olfr916   | 0        | 0        | 0        | 0        | 0        | 0         |
| ENSMUSG Gm10338   | 0        | 0        | 0        | 0        | 0        | 0         |
| ENSMUSG Spa17     | 4.790831 | 5.561956 | 3.382799 | 8.551143 | 5.651729 | 5.653656  |
| Mus_musc Mus_musc | 0.216906 | 0.255918 | 0.457622 | 0.237081 | 0        | 0.263331  |
| Mus_musc Mus_musc | 0        | 0        | 0        | 0        | 0        | 0         |
| Mus_musc Mus_musc | 0.018546 | 0.03208  | 0.203031 | 0.320834 | 0.217572 | 0.128847  |
| Mus_musc Mus_musc | 0        | 0        | 0        | 0        | 0        | 0         |
| Mus_musc Mus_musc | 0.204429 | 0.226253 | 0        | 0.351405 | 0.184252 | 0.118778  |
| Mus_musc Mus_musc | 0.210672 | 0.170685 | 0.278342 | 0.262445 | 0.231905 | 0.486653  |
| Mus_musc Mus_musc | 0        | 0.097555 | 0.077583 | 0.052239 | 0        | 0         |
| Mus_musc Mus_musc | 0        | 0        | 0        | 0.174016 | 0        | 0         |
| Mus_musc Mus_musc | 2.414341 | 1.971111 | 2.307684 | 0.966858 | 1.21926  | 1.244133  |
| Mus_musc Mus_musc | 0        | 0        | 0        | 0.232161 | 0        | 0         |
| Mus_musc Mus_musc | 0        | 0        | 0.168957 | 0        | 0.194185 | 0         |
| ENSMUSG Tmem238l  | 0        | 0        | 0        | 0.093931 | 0        | 0         |
| ENSMUSG 4930469K  | 0        | 0.034436 | 0.240654 | 0        | 0        | 0         |
| ENSMUSG Spi1      | 19.78507 | 16.599   | 23.04869 | 36.25918 | 33.8538  | 40.025904 |
| ENSMUSG Krt79     | 4.378568 | 8.075592 | 7.421952 | 6.739876 | 7.516303 | 6.059745  |
| ENSMUSG Rassf10   | 1.00244  | 1.270712 | 0.529762 | 1.204176 | 1.147032 | 1.293782  |
| ENSMUSG Acvr2b    | 3.453308 | 3.16758  | 2.753103 | 2.410691 | 2.212081 | 1.909219  |
| ENSMUSG Mageb5    | 0        | 0        | 0        | 0        | 0        | 0         |
| ENSMUSG Rnf113a2  | 7.32602  | 6.638088 | 7.751031 | 7.833873 | 7.644262 | 7.593854  |
| Mus_musc Mus_musc | 0.126387 | 0.069227 | 0.390474 | 0.413408 | 0.028114 | 0.351615  |
| Mus_musc Mus_musc | 0.638325 | 0.260664 | 0.698343 | 0.480177 | 0.575762 | 0.436278  |
| Mus_musc Mus_musc | 0        | 0        | 0        | 0.095846 | 0        | 0.099369  |
| Mus_musc Mus_musc | 0        | 0        | 0.209581 | 0        | 0.126218 | 0.077982  |
| Mus_musc Mus_musc | 0.61499  | 1.103779 | 0.869412 | 0.540751 | 0.513013 | 0.769167  |
| Mus_musc Mus_musc | 0.1114   | 0.361998 | 0.285497 | 0.296484 | 0.101332 | 0.232309  |
| ENSMUSG Gm20823   | 0        | 0        | 0        | 0        | 0        | 0         |
| Mus_musc Mus_musc | 0.259354 | 0.794826 | 0.481322 | 0.262524 | 0.16416  | 0.072245  |
| Mus_musc Mus_musc | 0.328118 | 0.466896 | 0.603242 | 0.342646 | 0.234492 | 0.462592  |
| ENSMUSG Gm16867   | 0.25965  | 0.217575 | 0.399616 | 0.317735 | 0.341602 | 0.392416  |
| ENSMUSG Esp3      | 0        | 0        | 0        | 0        | 0        | 0         |
| ENSMUSG Pfn2      | 6.059331 | 6.404999 | 4.632682 | 4.945767 | 4.872499 | 4.584303  |
| ENSMUSG Ces4a     | 0        | 0        | 0        | 0        | 0        | 0.020288  |
| ENSMUSG Mtx1      | 15.23045 | 12.01752 | 15.38552 | 15.61161 | 16.0444  | 15.230661 |
| ENSMUSG BC048507  | 0.141024 | 0.086928 | 0        | 0.078017 | 0.074055 | 0.146121  |
| ENSMUSG Dzip3     | 3.090919 | 3.345525 | 2.899002 | 3.269134 | 3.46884  | 3.217568  |

|                   |          |          |          |          |          |           |
|-------------------|----------|----------|----------|----------|----------|-----------|
| ENSMUSG Ipcef1    | 1.256897 | 1.091869 | 1.593386 | 1.954329 | 1.660193 | 1.62793   |
| ENSMUSG AF067061  | 0        | 0.027208 | 0        | 0.038835 | 0        | 0         |
| Mus_musc Mus_musc | 0        | 0        | 0        | 0        | 0        | 0         |
| Mus_musc Mus_musc | 0        | 0.216321 | 0        | 0        | 0        | 0         |
| ENSMUSG Olfr782   | 0        | 0        | 0        | 0        | 0        | 0         |
| ENSMUSG Gm3139    | 0        | 0        | 0        | 0        | 0        | 0         |
| Mus_musc Mus_musc | 0.188345 | 0.23185  | 0.142707 | 0.166172 | 0.063581 | 0.160509  |
| Mus_musc Mus_musc | 0        | 0        | 0        | 0        | 0        | 0         |
| ENSMUSG Prdm9     | 1.15376  | 0.90367  | 0.988849 | 0.85768  | 0.826398 | 0.980776  |
| ENSMUSG Erich1    | 7.464981 | 6.183768 | 7.856128 | 6.894366 | 5.490397 | 7.043793  |
| ENSMUSG Cd40      | 5.719509 | 5.556727 | 6.241247 | 7.361548 | 8.335602 | 7.188492  |
| Mus_musc Mus_musc | 1.325027 | 1.295301 | 2.413101 | 0.924818 | 1.04586  | 0.626989  |
| Mus_musc Mus_musc | 0        | 0.212813 | 0.092301 | 0        | 0.234434 | 0.0703    |
| Mus_musc Mus_musc | 4.108984 | 3.723968 | 3.780713 | 2.704441 | 3.020016 | 2.806283  |
| Mus_musc Mus_musc | 0        | 0        | 0        | 0        | 0        | 0         |
| ENSMUSG Zic2      | 0        | 0        | 0        | 0        | 0        | 0         |
| Mus_musc Mus_musc | 0        | 0.23242  | 0        | 0        | 0        | 0.144089  |
| ENSMUSG Nudt14    | 11.49987 | 14.51549 | 11.73912 | 13.71328 | 12.52797 | 14.955038 |
| ENSMUSG Mup15     | 0        | 0        | 0        | 0        | 0        | 0         |
| ENSMUSG Btdb6     | 8.791189 | 7.45395  | 7.612333 | 6.723881 | 6.863368 | 7.429037  |
| ENSMUSG Epdr1     | 3.675645 | 3.926462 | 3.117705 | 3.616209 | 3.002988 | 3.706017  |
| ENSMUSG Olfr498   | 0        | 0        | 0        | 0        | 0        | 0         |
| ENSMUSG Cdkn3     | 0.631189 | 0.086825 | 0.42051  | 0.877796 | 1.637674 | 1.716108  |
| ENSMUSG Atoh8     | 9.808776 | 10.31263 | 8.017329 | 5.96732  | 6.84611  | 6.557083  |
| ENSMUSG Wdtdc1    | 17.16963 | 18.38529 | 18.71896 | 17.26634 | 16.28941 | 16.807365 |
| ENSMUSG Kcnk2     | 9.305081 | 8.792793 | 5.829025 | 6.083506 | 6.5442   | 5.748934  |
| ENSMUSG Cldn11    | 0.029864 | 0.143252 | 0.064864 | 0.101525 | 0.111616 | 0.180837  |
| ENSMUSG Rgs22     | 1.418925 | 1.537238 | 0.882284 | 2.060251 | 1.98249  | 2.136429  |
| Mus_musc Mus_musc | 0        | 0        | 0        | 0        | 0        | 0.184186  |
| ENSMUSG AC144408  | 0        | 0        | 0        | 0.023292 | 0        | 0         |
| ENSMUSG Btdb8     | 1.74462  | 1.403817 | 1.561933 | 1.192838 | 1.318834 | 1.822842  |
| ENSMUSG Gm14085   | 0.336395 | 0.216693 | 0.468292 | 0.328383 | 0.280996 | 0.351161  |
| ENSMUSG Acsf3     | 3.797089 | 3.435895 | 3.009575 | 3.710127 | 3.486216 | 3.695025  |
| ENSMUSG Il15ra    | 4.79548  | 4.197679 | 7.886148 | 5.105263 | 4.058416 | 4.106497  |
| ENSMUSG Serpinb5  | 0        | 0        | 0        | 0.016151 | 0        | 0         |
| ENSMUSG Nlrp5     | 0        | 0        | 0        | 0        | 0        | 0         |
| ENSMUSG Actn4     | 128.6514 | 122.3406 | 119.3382 | 93.84954 | 97.09662 | 102.15059 |
| ENSMUSG Car8      | 41.19115 | 49.05843 | 33.73047 | 59.4179  | 54.88863 | 62.217407 |
| ENSMUSG Gm20425   | 0        | 0        | 0        | 0        | 0        | 0         |
| ENSMUSG Rusc1     | 13.73155 | 13.74    | 17.01311 | 10.72385 | 15.9969  | 13.434666 |
| ENSMUSG Usp11     | 8.062492 | 9.704756 | 9.998537 | 8.478874 | 9.391069 | 7.912002  |
| ENSMUSG 1700016D  | 0        | 0        | 0        | 0        | 0.086325 | 0         |
| ENSMUSG Ankrd10   | 16.03168 | 19.46037 | 18.79177 | 15.95137 | 14.38024 | 16.817926 |
| ENSMUSG Olfr524   | 0        | 0        | 0        | 0.007728 | 0.021986 | 0         |
| ENSMUSG Dmxl2     | 5.074905 | 4.830346 | 4.190448 | 4.382003 | 4.140861 | 4.265358  |
| ENSMUSG Naxd      | 56.70083 | 57.23605 | 60.888   | 50.62078 | 52.07273 | 47.45622  |
| ENSMUSG Rab20     | 7.702129 | 7.121284 | 7.752498 | 9.741779 | 9.76621  | 9.194493  |
| ENSMUSG Egfl6     | 26.27889 | 24.02126 | 22.87314 | 24.72822 | 24.11324 | 27.852232 |
| ENSMUSG Col4a1    | 127.6882 | 115.5679 | 126.7461 | 100.5862 | 109.5049 | 105.21123 |
| Mus_musc Mus_musc | 0        | 0        | 0        | 0        | 0        | 0.368372  |
| Mus_musc Mus_musc | 0        | 0        | 0.337872 | 0        | 0        | 0.07499   |
| Mus_musc Mus_musc | 0        | 0.154309 | 0        | 0        | 0        | 0         |
| ENSMUSG Gm45736   | 0.219942 | 0.093891 | 0        | 0.138189 | 0.089795 | 0.076405  |
| ENSMUSG Vmn2r114  | 0        | 0        | 0        | 0        | 0        | 0         |
| ENSMUSG Rab2b     | 5.881963 | 5.540447 | 6.060363 | 4.614137 | 4.650116 | 4.411364  |
| ENSMUSG Mroh2b    | 0        | 0        | 0        | 0.009586 | 0        | 0         |
| ENSMUSG Gzme      | 0        | 0        | 0        | 0        | 0        | 0         |
| ENSMUSG Mcpt8     | 0.2697   | 0.098088 | 0.749115 | 0.585175 | 0.230918 | 0.223413  |
| ENSMUSG Dab2      | 14.62761 | 14.32715 | 13.04679 | 16.89583 | 18.78535 | 17.036318 |
| ENSMUSG Ttc33     | 14.0284  | 12.25388 | 11.77388 | 12.83735 | 12.26903 | 11.975036 |
| ENSMUSG Wdr6      | 21.80196 | 18.85659 | 17.43012 | 17.82977 | 16.5606  | 18.667198 |
| ENSMUSG Tcl1b1    | 0        | 0        | 0        | 0        | 0        | 0         |
| ENSMUSG Trappc11  | 13.43474 | 12.84813 | 12.25223 | 12.33092 | 11.91203 | 12.816203 |
| ENSMUSG Asap3     | 2.356534 | 2.612794 | 1.842844 | 2.570497 | 2.295697 | 2.486195  |

|                   |          |          |          |          |          |           |
|-------------------|----------|----------|----------|----------|----------|-----------|
| ENSMUSG Otud4     | 12.67795 | 13.89359 | 12.10348 | 12.06055 | 11.45766 | 11.772888 |
| ENSMUSG Nxt1      | 12.54269 | 11.26375 | 11.68483 | 11.99541 | 12.55479 | 13.330206 |
| Mus_musc Mus_musc | 0        | 0        | 0        | 0        | 0        | 0         |
| Mus_musc Mus_musc | 0.233893 | 0.157237 | 0        | 0        | 0.27928  | 0.260556  |
| Mus_musc Mus_musc | 1.575067 | 1.920504 | 2.043424 | 2.271623 | 1.858966 | 2.671941  |
| Mus_musc Mus_musc | 0        | 0        | 0.090224 | 0        | 0.201134 | 0.230997  |
| Mus_musc Mus_musc | 0        | 0        | 0        | 0        | 0        | 0.250425  |
| ENSMUSG Ap3s2     | 6.051633 | 6.651306 | 6.228434 | 5.921174 | 5.456504 | 6.366941  |
| ENSMUSG Prpf38a   | 13.16443 | 14.3927  | 12.92549 | 11.37137 | 14.53491 | 13.436303 |
| ENSMUSG Hspbp1    | 16.04327 | 14.09899 | 14.59192 | 13.81102 | 13.0664  | 13.875047 |
| Mus_musc Mus_musc | 0.188031 | 0        | 0.209481 | 0        | 0        | 0         |
| Mus_musc Mus_musc | 0.593694 | 0.704451 | 0.391412 | 0.579973 | 0.440708 | 0.538125  |
| ENSMUSG Gm13757   | 0        | 0        | 0        | 0        | 0        | 0         |
| ENSMUSG Gm14399   | 3.592847 | 4.222463 | 3.05163  | 3.554453 | 3.925614 | 4.167691  |
| ENSMUSG Ly6g6e    | 2.321262 | 1.508694 | 1.730512 | 2.433309 | 1.71759  | 2.49313   |
| ENSMUSG Spns3     | 0.123486 | 0.148005 | 0.203373 | 0.918019 | 1.288895 | 1.381131  |
| ENSMUSG Tekt1     | 5.168038 | 7.342558 | 4.683595 | 9.059927 | 7.269175 | 8.313036  |
| ENSMUSG Megf6     | 15.58    | 11.4393  | 16.23832 | 8.794496 | 8.515058 | 9.247889  |
| ENSMUSG Tas2r106  | 0        | 0        | 0        | 0        | 0        | 0         |
| ENSMUSG Ankfy1    | 15.53302 | 13.83748 | 15.25642 | 13.4952  | 14.17361 | 13.733897 |
| ENSMUSG Exoc7     | 13.2107  | 13.50919 | 12.93808 | 12.19262 | 10.85516 | 11.435033 |
| ENSMUSG Galr2     | 0.063485 | 0.047724 | 0.094918 | 0.072297 | 0.294188 | 0.155526  |
| ENSMUSG Ube2g1    | 17.05032 | 17.38516 | 16.59459 | 14.59712 | 14.26827 | 13.942643 |
| Mus_musc Mus_musc | 0.087666 | 0.052781 | 0.153478 | 0        | 0.054503 | 0         |
| Mus_musc Mus_musc | 7.72272  | 9.427322 | 8.44524  | 8.894679 | 8.324262 | 10.283504 |
| Mus_musc Mus_musc | 0.078294 | 0.19766  | 0.104243 | 0        | 0.140487 | 0.289216  |
| Mus_musc Mus_musc | 0.710619 | 0.45513  | 0.498721 | 0.277223 | 0.593344 | 0.670124  |
| Mus_musc Mus_musc | 40.28427 | 31.97988 | 45.7384  | 30.05723 | 39.44144 | 36.932633 |
| Mus_musc Mus_musc | 0.702698 | 1.126313 | 1.04074  | 1.837356 | 0.935382 | 1.14236   |
| Mus_musc Mus_musc | 0.065487 | 0.102163 | 0        | 0        | 0.085621 | 0.721502  |
| Mus_musc Mus_musc | 0.897067 | 0.385773 | 0.735812 | 3.690153 | 5.655973 | 3.921864  |
| ENSMUSG Tmem175   | 5.843499 | 5.647663 | 5.053962 | 5.740298 | 5.57742  | 6.187007  |
| ENSMUSG Gm3317    | 0.157357 | 0        | 0.260729 | 0        | 0        | 0         |
| ENSMUSG Olfr469   | 0        | 0        | 0        | 0        | 0        | 0         |
| ENSMUSG Vmn1r191  | 0        | 0        | 0        | 0        | 0        | 0         |
| ENSMUSG Olfr740   | 0        | 0        | 0        | 0        | 0        | 0         |
| ENSMUSG Vmn2r48   | 0        | 0        | 0        | 0        | 0        | 0         |
| ENSMUSG Gm5861    | 0        | 0        | 0        | 0.041123 | 0.089201 | 0.051973  |
| ENSMUSG Aspdh     | 0        | 0        | 0.006478 | 0.089831 | 0        | 0.077152  |
| ENSMUSG Car5a     | 0        | 0        | 0        | 0        | 0        | 0         |
| ENSMUSG Banp      | 6.770851 | 9.564008 | 9.201053 | 7.98873  | 6.420373 | 7.765385  |
| ENSMUSG Ptprj     | 11.11504 | 9.961219 | 15.08248 | 18.39956 | 17.62226 | 12.95926  |
| ENSMUSG Oaz3      | 0        | 0.075622 | 0.170061 | 0.049715 | 0.048565 | 0.270117  |
| ENSMUSG Mrpl9     | 20.50707 | 21.34689 | 21.66941 | 19.90521 | 21.30359 | 18.451725 |
| ENSMUSG Rap1gds1  | 22.48607 | 22.04212 | 21.73637 | 18.46586 | 19.73815 | 18.937027 |
| ENSMUSG Them5     | 0.126355 | 0.111014 | 0        | 0        | 0.088198 | 0.069346  |
| ENSMUSG Jph3      | 0.038815 | 0.022058 | 0.017043 | 0        | 0.028694 | 0.060771  |
| ENSMUSG Pcsk1n    | 0.098517 | 0.178726 | 0        | 0        | 0.14634  | 0.062823  |
| ENSMUSG Megf9     | 12.03461 | 12.34414 | 10.02683 | 8.472823 | 9.46494  | 8.947464  |
| ENSMUSG Foxk2     | 11.93142 | 13.49163 | 13.00143 | 11.431   | 12.58431 | 12.500109 |
| ENSMUSG Nat8f4    | 0.912005 | 0.836233 | 0.82958  | 0.830592 | 0.971233 | 1.388189  |
| ENSMUSG Ddrk1     | 72.63302 | 74.66091 | 77.22623 | 65.63882 | 60.92201 | 62.329542 |
| ENSMUSG Zfp28     | 2.061986 | 1.306652 | 1.427129 | 1.788183 | 1.509208 | 1.217922  |
| ENSMUSG Phactr2   | 24.82341 | 24.17756 | 10.2928  | 16.26854 | 15.49819 | 7.278191  |
| ENSMUSG Impdh2    | 23.02098 | 20.71475 | 19.83365 | 19.37108 | 21.05601 | 20.900351 |
| ENSMUSG Olfr830   | 0        | 0        | 0        | 0        | 0        | 0         |
| ENSMUSG Hnnpk     | 155.2581 | 152.8015 | 145.1885 | 135.6492 | 125.3518 | 130.07369 |
| ENSMUSG 1700067P: | 0        | 0        | 0        | 0        | 0        | 0         |
| ENSMUSG Smad5     | 17.12391 | 17.03104 | 15.60954 | 13.63647 | 13.71537 | 12.89801  |
| ENSMUSG Trpc7     | 0        | 0        | 0        | 0        | 0        | 0         |
| ENSMUSG Pcdhgc3   | 50.47918 | 47.77694 | 50.59672 | 37.34246 | 37.71195 | 38.715897 |
| ENSMUSG Ifitm2    | 281.7265 | 273.9737 | 336.2219 | 198.0878 | 222.0841 | 200.60216 |
| ENSMUSG Ccnh      | 8.696427 | 8.209535 | 9.619533 | 8.79153  | 8.394637 | 8.684974  |
| ENSMUSG Rasa1     | 15.69186 | 16.55302 | 15.15013 | 15.26448 | 14.87367 | 14.220006 |

|                   |          |          |          |          |          |           |
|-------------------|----------|----------|----------|----------|----------|-----------|
| ENSMUSG Sort1     | 84.85953 | 84.39734 | 75.18484 | 65.68321 | 67.00191 | 66.279226 |
| ENSMUSG Mybphl    | 0.748884 | 5.983958 | 0.995214 | 1.603172 | 0.954677 | 1.475366  |
| ENSMUSG Psr1      | 0.275842 | 0.416458 | 0.565252 | 1.970228 | 1.468477 | 2.110483  |
| ENSMUSG Cry2      | 26.26999 | 25.01612 | 23.62575 | 13.42825 | 12.18374 | 12.612418 |
| ENSMUSG Celsr2    | 3.406752 | 3.299696 | 2.462303 | 2.466773 | 2.705679 | 2.38224   |
| ENSMUSG Psma5     | 25.03919 | 22.38147 | 29.76187 | 26.00703 | 27.97688 | 27.557895 |
| ENSMUSG Ptprz1    | 1.023714 | 1.549002 | 0.668251 | 1.207823 | 1.566255 | 1.530481  |
| ENSMUSG Gsx1      | 0        | 0        | 0        | 0        | 0        | 0         |
| ENSMUSG Rnf26     | 7.712697 | 6.444037 | 8.049572 | 6.545165 | 8.136569 | 7.56839   |
| ENSMUSG Esp5      | 0        | 0        | 0        | 0        | 0        | 0         |
| ENSMUSG Gm5129    | 0.03238  | 0        | 0        | 0        | 0        | 0         |
| ENSMUSG Ovol3     | 0        | 0        | 0        | 0.295423 | 1.020296 | 0.254736  |
| ENSMUSG Ccpg1os   | 6.873594 | 7.070012 | 5.774005 | 12.44901 | 10.8208  | 9.561365  |
| ENSMUSG Agr3      | 2.333548 | 3.804073 | 2.080861 | 4.193031 | 3.080098 | 3.774277  |
| ENSMUSG Fam3b     | 0.680743 | 0.484836 | 0.739356 | 0.900874 | 0.969763 | 0.860902  |
| ENSMUSG Grik1     | 0        | 0.031706 | 0.040905 | 0        | 0.013536 | 0.028018  |
| ENSMUSG 4930553J1 | 0        | 0        | 0        | 0        | 0        | 0         |
| ENSMUSG Nup85     | 11.32064 | 11.37619 | 12.19727 | 10.33289 | 10.56863 | 9.718303  |
| ENSMUSG Kcnn2     | 0.243236 | 0.285033 | 0.18449  | 0.240985 | 0.181875 | 0.242861  |
| ENSMUSG Thnsl2    | 3.186983 | 3.875645 | 2.766715 | 3.538023 | 4.56333  | 3.519463  |
| ENSMUSG Hao1      | 0        | 0        | 0        | 0        | 0        | 0         |
| ENSMUSG Gm10295   | 0        | 0        | 0        | 0        | 0        | 0         |
| ENSMUSG Hist1h2ak | 0        | 0        | 0        | 0        | 0        | 0.1406    |
| ENSMUSG Olfr194   | 0        | 0        | 0        | 0        | 0        | 0         |
| ENSMUSG Armcx1    | 13.35275 | 13.75957 | 13.96213 | 9.141651 | 9.172303 | 8.173711  |
| ENSMUSG Crlf2     | 14.55913 | 11.53025 | 18.13579 | 19.14499 | 19.52255 | 22.28013  |
| ENSMUSG Shank2    | 1.859038 | 1.873241 | 1.395434 | 1.593379 | 1.357768 | 1.884753  |
| ENSMUSG Aldh8a1   | 0        | 0.020493 | 0        | 0.0436   | 0        | 0.012067  |
| ENSMUSG Dlgap5    | 0.172216 | 0.348672 | 0.313934 | 0.893149 | 1.585141 | 1.949251  |
| ENSMUSG H2-DMb2   | 25.17388 | 22.12388 | 41.53687 | 64.33965 | 47.33414 | 62.333785 |
| ENSMUSG Rab11a    | 50.37675 | 48.32536 | 54.86952 | 38.81576 | 38.6231  | 38.861604 |
| ENSMUSG Prpf38b   | 30.39146 | 31.4718  | 34.88729 | 31.59772 | 30.97082 | 31.762177 |
| ENSMUSG Slc25a54  | 0        | 0.027302 | 0.023124 | 0        | 0        | 0         |
| ENSMUSG Gpsm2     | 2.668742 | 2.620339 | 3.044007 | 2.857135 | 2.85376  | 3.68283   |
| ENSMUSG Stxbp3    | 24.91199 | 23.65773 | 26.45728 | 24.8769  | 24.06305 | 23.764353 |
| ENSMUSG Clcc1     | 16.52041 | 16.9227  | 16.96199 | 14.42052 | 15.57433 | 13.189897 |
| ENSMUSG Sypl2     | 0.041468 | 0.01977  | 0.044692 | 0.025528 | 0.025973 | 0.066965  |
| ENSMUSG 1700013FC | 2.243576 | 2.184141 | 1.332321 | 3.144664 | 1.563019 | 2.865057  |
| ENSMUSG Ampd2     | 5.122474 | 5.403524 | 5.748436 | 7.180302 | 7.374165 | 7.678665  |
| ENSMUSG Hhip      | 5.322021 | 5.260179 | 5.220218 | 3.917847 | 4.55345  | 4.976185  |
| ENSMUSG Pla2g4c   | 0.09507  | 0.0706   | 0.111079 | 0.582107 | 0.364022 | 0.693563  |
| ENSMUSG Eef1g     | 90.29813 | 94.50596 | 97.35277 | 101.8096 | 105.663  | 113.39426 |
| ENSMUSG Tut1      | 6.472946 | 5.779735 | 6.231666 | 6.498899 | 5.497401 | 5.788289  |
| ENSMUSG Mta2      | 38.86536 | 37.30579 | 38.27425 | 38.94557 | 39.45915 | 39.053749 |
| ENSMUSG Eml3      | 13.82751 | 12.58007 | 14.55928 | 14.73877 | 13.20057 | 13.995874 |
| ENSMUSG Mios      | 5.072262 | 5.37747  | 4.196401 | 4.920788 | 4.483459 | 4.279939  |
| ENSMUSG Dst       | 29.77543 | 27.91589 | 25.76873 | 21.42534 | 21.84822 | 20.256468 |
| ENSMUSG Rom1      | 3.586644 | 3.227551 | 4.298462 | 4.480465 | 4.059763 | 4.606104  |
| ENSMUSG B3gat3    | 19.51585 | 19.31721 | 22.08363 | 19.95797 | 20.02286 | 23.175791 |
| ENSMUSG Prim2     | 3.804709 | 4.361405 | 4.179737 | 5.217401 | 5.422491 | 6.790177  |
| ENSMUSG Zfp142    | 4.526963 | 4.389791 | 4.651809 | 3.618334 | 3.974616 | 4.227728  |
| ENSMUSG Emid1     | 8.390709 | 8.743338 | 8.874275 | 5.447069 | 5.016422 | 5.137305  |
| ENSMUSG Ccnd3     | 62.91364 | 59.53684 | 68.17187 | 46.5528  | 49.84918 | 51.398079 |
| ENSMUSG Zfc3h1    | 7.565934 | 7.742568 | 7.29252  | 8.291856 | 8.033084 | 7.759531  |
| ENSMUSG Ogt       | 29.28287 | 30.08842 | 32.04977 | 28.81707 | 24.03459 | 25.621235 |
| ENSMUSG Scx       | 3.252308 | 2.656806 | 3.851091 | 3.146666 | 2.569139 | 2.08602   |
| ENSMUSG Fat3      | 1.264408 | 1.532634 | 1.495374 | 1.135666 | 1.132446 | 0.587806  |
| ENSMUSG Defb18    | 0        | 0        | 0        | 0        | 0        | 0         |
| ENSMUSG Zfp558    | 0.165362 | 0.565687 | 0.205699 | 0.276938 | 0.565871 | 0.430735  |
| ENSMUSG Rsg1      | 0.444021 | 0.588412 | 0.420368 | 0.349269 | 0.508713 | 0.390444  |
| ENSMUSG Ubtfl1    | 0        | 0        | 0        | 0        | 0        | 0         |
| ENSMUSG Yju2      | 6.502505 | 7.137934 | 7.357734 | 5.482987 | 5.836476 | 5.006582  |
| ENSMUSG Slc36a3   | 0.058013 | 0        | 0        | 0        | 0        | 0.135763  |
| ENSMUSG Sh3gl1    | 25.16609 | 25.63206 | 25.659   | 23.08521 | 22.09333 | 22.228516 |

|                   |          |          |          |          |          |           |
|-------------------|----------|----------|----------|----------|----------|-----------|
| ENSMUSG Olfr1449  | 0        | 0        | 0        | 0        | 0        | 0         |
| ENSMUSG Ebi3      | 1.574967 | 1.279804 | 1.610676 | 4.028007 | 3.175792 | 2.817938  |
| ENSMUSG Fcrl6     | 0        | 0        | 0.050805 | 0        | 0        | 0         |
| ENSMUSG Snap25    | 0.135931 | 0.100257 | 0        | 0        | 0        | 0         |
| ENSMUSG Zfp488    | 0        | 0        | 0        | 0        | 0        | 0         |
| ENSMUSG Pcdhb17   | 1.798605 | 1.856778 | 2.27114  | 1.209935 | 1.368663 | 1.103774  |
| ENSMUSG Cxcl3     | 0.083282 | 0.133957 | 0.192048 | 3.602443 | 4.394069 | 3.816426  |
| ENSMUSG Areg      | 8.229896 | 3.046179 | 4.427031 | 0.658683 | 1.579461 | 1.470155  |
| ENSMUSG Jrk       | 0.96181  | 0.738908 | 0.598853 | 0.80277  | 0.823673 | 0.58173   |
| ENSMUSG Cxcl15    | 272.3926 | 288.0632 | 272.2994 | 651.2269 | 597.13   | 708.13306 |
| ENSMUSG Ereg      | 0.23299  | 0.066875 | 0.04739  | 0.03794  | 0.039664 | 0.02686   |
| ENSMUSG Mthfd2l   | 3.425895 | 3.133473 | 2.765905 | 2.975485 | 2.208495 | 2.673478  |
| ENSMUSG Cxcl5     | 2.156929 | 0.858743 | 0.286602 | 7.108311 | 8.736728 | 6.979723  |
| ENSMUSG Rassf6    | 2.020756 | 1.556626 | 1.569338 | 2.230019 | 2.026454 | 1.865284  |
| ENSMUSG Pf4       | 11.60936 | 11.1958  | 15.62709 | 17.98722 | 19.85204 | 20.301644 |
| ENSMUSG Ppbb      | 9.561477 | 10.71359 | 15.46881 | 5.991105 | 5.037074 | 3.825393  |
| ENSMUSG Vamp9     | 0        | 0.067705 | 0.179914 | 0        | 0.097342 | 0         |
| ENSMUSG Gal3st1   | 5.392844 | 5.353938 | 4.534073 | 6.509951 | 6.698319 | 6.667072  |
| ENSMUSG Mmp12     | 1.329625 | 1.366259 | 1.750716 | 559.7448 | 512.7321 | 536.21538 |
| ENSMUSG Gm21996   | 0        | 0        | 0        | 0        | 0        | 0         |
| ENSMUSG Zfp668    | 2.855798 | 2.471362 | 2.238047 | 2.881514 | 2.508565 | 2.998639  |
| ENSMUSG Olfr1370  | 0        | 0        | 0        | 0        | 0        | 0         |
| ENSMUSG Olfr1026  | 0        | 0        | 0        | 0        | 0        | 0         |
| ENSMUSG Kcna10    | 0        | 0        | 0        | 0        | 0        | 0         |
| ENSMUSG M6pr      | 71.4491  | 72.32208 | 72.15543 | 72.16592 | 73.07528 | 71.07086  |
| ENSMUSG Hspa2     | 9.19307  | 11.12292 | 8.85109  | 10.32275 | 11.16784 | 12.420776 |
| ENSMUSG Chrdl2    | 0        | 0.054414 | 0.063149 | 0        | 0        | 0         |
| ENSMUSG Ntm       | 0.188778 | 0.154757 | 0.312039 | 0.066624 | 0.151115 | 0.046199  |
| ENSMUSG Zfp74     | 3.569574 | 3.824081 | 3.77883  | 3.342912 | 3.83201  | 3.403316  |
| ENSMUSG 2310003LC | 0        | 0        | 0        | 0        | 0        | 0         |
| ENSMUSG Cd207     | 2.521005 | 1.563775 | 2.577941 | 2.324981 | 2.664598 | 2.614186  |
| ENSMUSG B3galt1   | 0.439812 | 0.746261 | 0.602303 | 0.271251 | 0.470116 | 0.2649    |
| ENSMUSG Gna11     | 37.26448 | 38.00496 | 39.09533 | 25.46146 | 26.08921 | 27.080019 |
| ENSMUSG Gpsm3     | 17.57855 | 15.58467 | 20.33395 | 20.77279 | 20.23274 | 23.875897 |
| ENSMUSG Dio1      | 0.09791  | 0        | 0.045583 | 0.802637 | 1.464596 | 0.624162  |
| ENSMUSG Rab24     | 4.661422 | 4.617298 | 3.832298 | 4.179132 | 3.467795 | 3.657467  |
| Mus_musc Mus_musc | 0        | 0        | 0        | 0.254884 | 0.282784 | 0.243776  |
| ENSMUSG Snrpb2    | 12.13963 | 10.8465  | 11.9432  | 11.00233 | 10.5703  | 10.088242 |
| ENSMUSG Nfx1      | 14.27621 | 14.30212 | 14.02596 | 12.74229 | 13.44129 | 13.439133 |
| ENSMUSG Tmem38b   | 11.61236 | 12.58173 | 12.6866  | 11.7321  | 12.60264 | 11.547001 |
| ENSMUSG Rad23b    | 34.54178 | 30.16737 | 30.98809 | 33.99481 | 32.9525  | 35.516125 |
| ENSMUSG Aqp7      | 0.02076  | 0.153857 | 0.040112 | 0.039734 | 0.09161  | 0.087465  |
| ENSMUSG Gm13128   | 0        | 0        | 0        | 0        | 0        | 0         |
| ENSMUSG Pramef17  | 0        | 0        | 0        | 0        | 0        | 0         |
| Mus_musc Mus_musc | 10.69321 | 10.29121 | 10.40604 | 4.525874 | 7.764358 | 5.370258  |
| ENSMUSG Ugt2a3    | 0.053292 | 0.087469 | 0        | 0        | 0        | 0         |
| ENSMUSG Gm13212   | 0.817252 | 0.852225 | 0.630031 | 0.69934  | 1.007647 | 0.983516  |
| ENSMUSG Zfp990    | 0        | 0        | 0        | 0        | 0        | 0         |
| ENSMUSG Gm438     | 0        | 0        | 0        | 0        | 0        | 0         |
| ENSMUSG Gm436     | 0        | 0        | 0        | 0        | 0        | 0         |
| ENSMUSG Gm13124   | 0        | 0        | 0        | 0        | 0        | 0         |
| Mus_musc Mus_musc | 0.239856 | 0.257091 | 0        | 0.132818 | 0.324568 | 0.636516  |
| ENSMUSG Rpl18a    | 304.3652 | 450.9967 | 343.1547 | 324.2177 | 291.9945 | 308.1053  |
| ENSMUSG Olfr1445  | 0        | 0        | 0        | 0        | 0        | 0         |
| ENSMUSG Hpdl      | 0.112986 | 0.308362 | 0.162006 | 0.202858 | 0        | 0.208894  |
| ENSMUSG Alas1     | 103.046  | 106.5015 | 113.2939 | 63.61214 | 64.36257 | 96.320391 |
| ENSMUSG Olfr1138  | 0        | 0        | 0        | 0        | 0        | 0         |
| ENSMUSG Cntrob    | 1.815587 | 1.822656 | 2.00691  | 2.234402 | 2.053229 | 2.310867  |
| ENSMUSG Troap     | 0.092056 | 0.136183 | 0.093839 | 0.221754 | 0.828709 | 0.903438  |
| ENSMUSG Rbbp9     | 18.38042 | 20.45487 | 17.46368 | 14.2735  | 13.0781  | 11.944308 |
| ENSMUSG Pdxk      | 15.6605  | 14.97348 | 12.81234 | 13.0508  | 12.88986 | 13.583035 |
| ENSMUSG Col6a1    | 47.88211 | 45.00575 | 48.03088 | 67.45805 | 72.55175 | 76.930016 |
| ENSMUSG Olfr1155  | 0        | 0        | 0        | 0        | 0        | 0         |
| Mus_musc Mus_musc | 0        | 0        | 0        | 0.750481 | 0.114792 | 0         |

|                   |          |          |          |          |          |           |
|-------------------|----------|----------|----------|----------|----------|-----------|
| ENSMUSG Mgme1     | 3.162613 | 4.745905 | 3.904021 | 3.512247 | 3.799489 | 4.304985  |
| ENSMUSG Olfr1157  | 0        | 0        | 0        | 0        | 0        | 0         |
| ENSMUSG Olfr74    | 0        | 0        | 0        | 0        | 0        | 0         |
| Mus_musc Mus_musc | 0.704015 | 1.003135 | 0.888446 | 0.785856 | 0.968491 | 2.314228  |
| ENSMUSG Bfsp1     | 0.487518 | 0.581522 | 0.27768  | 0.9551   | 0.676849 | 0.682589  |
| ENSMUSG Vwde      | 0        | 0        | 0        | 0        | 0        | 0         |
| ENSMUSG Lca5      | 2.264323 | 3.257471 | 1.856791 | 3.230448 | 2.901898 | 3.105097  |
| ENSMUSG Drd2      | 0.037355 | 0.041925 | 0.059496 | 0        | 0.070733 | 0.117946  |
| ENSMUSG Zfp109    | 1.811566 | 1.793266 | 1.72543  | 1.254792 | 1.36097  | 1.520068  |
| ENSMUSG Ankk1     | 0.030068 | 0.051171 | 0        | 0        | 0        | 0.017984  |
| ENSMUSG Kif23     | 1.045102 | 1.165469 | 1.364266 | 2.070187 | 2.765933 | 2.874858  |
| ENSMUSG Glce      | 7.285555 | 7.212158 | 6.70825  | 5.896225 | 6.547281 | 6.817091  |
| ENSMUSG Phip      | 8.444792 | 9.362319 | 7.418191 | 8.55755  | 7.899454 | 8.260255  |
| ENSMUSG Fdx1l     | 4.140142 | 0.961242 | 4.232427 | 1.031935 | 4.91055  | 6.143477  |
| ENSMUSG Irak1bp1  | 2.029006 | 1.437371 | 1.207917 | 1.510666 | 1.656094 | 1.797031  |
| ENSMUSG Map3k10   | 6.853691 | 7.136596 | 8.181491 | 6.876494 | 6.914069 | 7.054714  |
| ENSMUSG Clec2g    | 0        | 0        | 0        | 0        | 0.057607 | 0.020864  |
| ENSMUSG Taf11     | 14.94322 | 15.43002 | 15.44884 | 11.70377 | 12.95065 | 13.397559 |
| ENSMUSG Tspan32   | 1.276935 | 1.320774 | 1.528863 | 3.184133 | 1.780418 | 2.130886  |
| ENSMUSG Snrpc     | 34.08258 | 37.15606 | 34.97704 | 35.46037 | 35.7381  | 35.11129  |
| ENSMUSG Lhx2      | 0        | 0        | 0        | 0        | 0        | 0         |
| ENSMUSG Grm8      | 0.016141 | 0.034175 | 0        | 0        | 0.017962 | 0.018008  |
| ENSMUSG Ip6k3     | 1.195593 | 1.386442 | 1.505048 | 0.798234 | 0.857323 | 0.470565  |
| ENSMUSG Nudt3     | 23.7666  | 24.90942 | 28.53412 | 21.54753 | 23.62331 | 23.124508 |
| ENSMUSG MlIt1     | 20.22662 | 18.95946 | 17.93804 | 15.46279 | 15.53567 | 16.41185  |
| Mus_musc Mus_musc | 0        | 0.466602 | 0.153557 | 0.070923 | 0.416005 | 0         |
| Mus_musc Mus_musc | 0.177802 | 0        | 0        | 0.088811 | 0.195398 | 0         |
| Mus_musc Mus_musc | 0.228235 | 0.143469 | 0.332513 | 0.074784 | 0.057859 | 0.346096  |
| Mus_musc Mus_musc | 0        | 0        | 0        | 0.295746 | 0.171792 | 0         |
| Mus_musc Mus_musc | 0        | 0        | 0        | 0.278639 | 0        | 0.135032  |
| Mus_musc Mus_musc | 0.957093 | 0.679013 | 0.56029  | 0.349176 | 0.75182  | 0.401349  |
| ENSMUSG Rcc1l     | 4.501777 | 4.012805 | 4.402894 | 3.652502 | 3.740523 | 4.620805  |
| ENSMUSG Pcbp1     | 104.4105 | 103.233  | 108.8542 | 101.2265 | 98.93258 | 103.96257 |
| ENSMUSG Cldn24    | 0.088674 | 0.054928 | 0.147108 | 0.714216 | 0.80163  | 0.495562  |
| ENSMUSG Olfr99    | 0.401842 | 0.390137 | 0.340201 | 0.443951 | 0.442245 | 0.621402  |
| ENSMUSG Alg13     | 1.784773 | 1.60326  | 1.741204 | 1.648386 | 2.05175  | 1.810205  |
| ENSMUSG Trpc5     | 0        | 0        | 0        | 0        | 0        | 0         |
| ENSMUSG Ubr7      | 13.58186 | 14.42911 | 13.86297 | 11.75833 | 12.20741 | 11.665855 |
| ENSMUSG Gm20604   | 4.371278 | 3.267198 | 4.343435 | 4.737991 | 4.277913 | 4.812833  |
| ENSMUSG Man2b1    | 33.77829 | 31.95475 | 38.40092 | 70.9023  | 69.2153  | 75.274488 |
| ENSMUSG Klf5      | 11.88123 | 10.50608 | 7.76357  | 6.958718 | 8.978704 | 8.266155  |
| ENSMUSG Ust       | 2.849423 | 3.344328 | 2.494852 | 2.519098 | 3.076693 | 2.399976  |
| ENSMUSG Champ1    | 4.979721 | 5.227521 | 5.459417 | 4.826444 | 4.203013 | 4.448447  |
| ENSMUSG Olfr736   | 0        | 0        | 0        | 0        | 0        | 0         |
| ENSMUSG Ppp1r2    | 61.30443 | 64.52104 | 63.11685 | 42.3024  | 43.6253  | 40.652112 |
| ENSMUSG Ubiad1    | 7.750012 | 7.92836  | 7.371646 | 7.554059 | 7.305898 | 7.131062  |
| ENSMUSG Chst13    | 0.091684 | 0        | 0.083497 | 0.78123  | 0.948483 | 1.135426  |
| ENSMUSG Ufm1      | 11.63985 | 11.66749 | 10.87119 | 11.99476 | 11.98831 | 11.125308 |
| ENSMUSG Stoml3    | 0        | 0        | 0        | 0.164044 | 0.17935  | 0.105649  |
| ENSMUSG Trpc4     | 0.016242 | 0.044031 | 0.035947 | 0.066891 | 0.078429 | 0.089203  |
| ENSMUSG Hoxb8     | 0.156562 | 0.025826 | 0.151113 | 0.073833 | 0.16402  | 0.119203  |
| ENSMUSG Top1mt    | 1.995327 | 2.17379  | 2.272426 | 2.599544 | 2.584262 | 2.576043  |
| ENSMUSG Hoxa10    | 0        | 0        | 0        | 0        | 0        | 0         |
| ENSMUSG Grn       | 85.36344 | 72.35972 | 95.64632 | 117.3747 | 129.4628 | 144.05249 |
| ENSMUSG Vmn1r48   | 0        | 0        | 0        | 0        | 0        | 0         |
| ENSMUSG Coq10b    | 22.31047 | 22.91674 | 23.2788  | 13.33581 | 16.27185 | 12.976356 |
| ENSMUSG Arl16     | 8.045858 | 6.64597  | 6.800839 | 6.206131 | 8.205549 | 7.008175  |
| ENSMUSG Trim30d   | 0.236977 | 0.11737  | 0.572605 | 0.189411 | 0.294604 | 0.217466  |
| ENSMUSG Rdh19     | 0        | 0        | 0        | 0        | 0.027922 | 0         |
| ENSMUSG Pax2      | 0        | 0        | 0        | 0        | 0        | 0         |
| ENSMUSG Spryd4    | 5.337931 | 4.754781 | 4.214248 | 3.763121 | 4.761304 | 4.753016  |
| ENSMUSG Wars2     | 2.557125 | 3.109815 | 2.544858 | 2.906958 | 3.054295 | 2.9063    |
| ENSMUSG Plekhh3   | 5.091901 | 5.289433 | 5.045981 | 5.368732 | 4.922479 | 4.802378  |
| ENSMUSG Rab11fip5 | 7.66926  | 7.555765 | 7.19068  | 9.833874 | 9.81002  | 12.257522 |

|                    |          |          |          |          |          |           |
|--------------------|----------|----------|----------|----------|----------|-----------|
| ENSMUSG Zfp52      | 1.92006  | 2.229397 | 2.452004 | 2.030775 | 2.260554 | 1.972611  |
| ENSMUSG Olfr645    | 0        | 0        | 0        | 0        | 0        | 0         |
| ENSMUSG Olfr309    | 0        | 0        | 0        | 0        | 0        | 0         |
| ENSMUSG Olfr634-ps | 0        | 0        | 0        | 0        | 0        | 0         |
| Mus_musc Mus_musc  | 0.851875 | 0.816958 | 1.17176  | 0.727735 | 0.938884 | 0.70893   |
| ENSMUSG Gtf2h4     | 4.70458  | 3.396291 | 4.783014 | 3.701886 | 4.248391 | 4.361589  |
| Mus_musc Mus_musc  | 0        | 0        | 0        | 0.325506 | 0        | 0         |
| Mus_musc Mus_musc  | 0        | 0        | 0        | 0        | 0.186692 | 0         |
| Mus_musc Mus_musc  | 0.056099 | 0.354888 | 0.205155 | 0.916781 | 0.392698 | 0.395158  |
| Mus_musc Mus_musc  | 0.120796 | 0.300358 | 0.127299 | 0.180871 | 0.145394 | 0.429768  |
| Mus_musc Mus_musc  | 0        | 0        | 0.168936 | 0.177971 | 0        | 0         |
| ENSMUSG Olfr878    | 0        | 0        | 0        | 0        | 0        | 0         |
| ENSMUSG Olfr1448   | 0        | 0        | 0        | 0        | 0        | 0         |
| ENSMUSG Olfr877    | 0        | 0        | 0        | 0        | 0        | 0         |
| ENSMUSG Olfr145    | 0        | 0        | 0        | 0        | 0        | 0         |
| ENSMUSG Msx1       | 3.037558 | 2.660978 | 3.228077 | 2.051592 | 1.486013 | 2.544245  |
| ENSMUSG Dpep3      | 0.084935 | 0.022174 | 0.048054 | 0        | 0        | 0.03764   |
| Mus_musc Mus_musc  | 0        | 0        | 0.333244 | 0        | 0        | 0         |
| ENSMUSG Gm428      | 0        | 0        | 0        | 0        | 0        | 0         |
| ENSMUSG Acot6      | 0.625156 | 0.864924 | 0.741649 | 0.753765 | 0.746883 | 0.747221  |
| ENSMUSG Esrp2      | 13.16725 | 12.16678 | 12.23553 | 11.04545 | 11.41046 | 11.001381 |
| ENSMUSG Olfr251    | 0        | 0        | 0        | 0        | 0        | 0         |
| Mus_musc Mus_musc  | 1.761596 | 4.58989  | 0.778605 | 1.219119 | 0.472918 | 1.786247  |
| Mus_musc Mus_musc  | 0        | 0        | 0        | 0.05079  | 0.154145 | 0.090379  |
| Mus_musc Mus_musc  | 0        | 0.193002 | 0        | 0        | 0        | 0         |
| ENSMUSG Gm45208    | 0.278734 | 0.228959 | 0.453265 | 0.215488 | 0.126599 | 0.160579  |
| Mus_musc Mus_musc  | 0.157327 | 0.341169 | 0.351281 | 0.332213 | 0.360709 | 0.198811  |
| Mus_musc Mus_musc  | 1.012072 | 7.102797 | 2.642889 | 2.456844 | 0.860666 | 1.783445  |
| Mus_musc Mus_musc  | 0.51148  | 0.376877 | 0.365187 | 0.33574  | 0.402886 | 0.616974  |
| Mus_musc Mus_musc  | 0        | 0        | 0        | 0        | 0        | 0         |
| Mus_musc Mus_musc  | 0.037209 | 0        | 0        | 0.289358 | 0        | 0.05308   |
| Mus_musc Mus_musc  | 0.244201 | 0.045806 | 0.135724 | 0        | 0.122109 | 0         |
| Mus_musc Mus_musc  | 0        | 0.462928 | 0        | 0        | 0        | 0         |
| ENSMUSG Cr1l       | 46.45871 | 44.05158 | 43.06378 | 39.20877 | 37.11312 | 39.154279 |
| ENSMUSG Ppfbp1     | 37.78724 | 37.83992 | 35.08567 | 27.87502 | 26.1768  | 26.864526 |
| Mus_musc Mus_musc  | 0.101789 | 0.119985 | 0.238946 | 0.160657 | 0.396631 | 0         |
| Mus_musc Mus_musc  | 0        | 0        | 0.279141 | 0        | 0.183775 | 0.292827  |
| Mus_musc Mus_musc  | 0.743079 | 1.194649 | 0.930073 | 1.073729 | 1.13739  | 0.569938  |
| Mus_musc Mus_musc  | 0.062868 | 0.094235 | 0.364696 | 0.387618 | 0.447207 | 0.512347  |
| Mus_musc Mus_musc  | 0        | 0        | 0        | 0        | 0.27226  | 0         |
| Mus_musc Mus_musc  | 4.832085 | 4.574984 | 6.236749 | 3.605155 | 3.140177 | 4.257284  |
| Mus_musc Mus_musc  | 0.98886  | 1.017198 | 1.287965 | 1.223094 | 0.937953 | 0.778004  |
| Mus_musc Mus_musc  | 0.537112 | 0.188421 | 0.517542 | 0.418625 | 0.182544 | 0.240048  |
| Mus_musc Mus_musc  | 0.291674 | 0.057824 | 0.211998 | 0.498922 | 0.362495 | 0.15088   |
| Mus_musc Mus_musc  | 1.023571 | 1.405993 | 1.200975 | 0.827601 | 2.044362 | 1.187054  |
| ENSMUSG Gm21693    | 0        | 0        | 0        | 0        | 0        | 0         |
| ENSMUSG Tvp23a     | 0.799698 | 0.476436 | 1.182377 | 0.819227 | 0.832407 | 0.784575  |
| ENSMUSG Olfr47     | 0        | 0        | 0        | 0        | 0        | 0         |
| ENSMUSG Mtnr1b     | 0        | 0        | 0        | 0        | 0        | 0         |
| ENSMUSG Pga5       | 0        | 0        | 0        | 0        | 0        | 0         |
| ENSMUSG Sixl1      | 0        | 0        | 0        | 0        | 0        | 0         |
| ENSMUSG Ccdc62     | 0.499787 | 0.440043 | 0.295726 | 0.307517 | 0.271427 | 0.411876  |
| ENSMUSG Zswim3     | 2.384347 | 2.003171 | 2.491122 | 2.278404 | 2.341444 | 2.508007  |
| ENSMUSG Serpinb9   | 44.16863 | 45.3301  | 47.62066 | 38.86754 | 37.52629 | 38.043144 |
| ENSMUSG Ptprcap    | 13.19118 | 8.215869 | 16.65362 | 23.81046 | 20.72547 | 22.37639  |
| ENSMUSG Olfr574    | 0        | 0        | 0        | 0        | 0        | 0         |
| ENSMUSG Zfp57      | 7.576826 | 6.361916 | 8.072882 | 5.37495  | 4.184471 | 4.976877  |
| ENSMUSG Ccdc86     | 3.081453 | 2.594679 | 3.275347 | 3.37156  | 3.32257  | 3.524801  |
| ENSMUSG Vps53      | 14.8413  | 13.88284 | 12.1493  | 13.71459 | 14.56235 | 15.599852 |
| ENSMUSG Thoc7      | 16.03607 | 18.93489 | 19.10668 | 18.22999 | 18.83112 | 16.827095 |
| ENSMUSG Glod4      | 27.06335 | 27.70202 | 24.70359 | 26.3578  | 25.31533 | 25.336156 |
| ENSMUSG Vmn2r92    | 0        | 0        | 0        | 0        | 0        | 0         |
| ENSMUSG Cd320      | 2.36031  | 2.693957 | 3.258189 | 3.858954 | 3.801855 | 3.724998  |
| ENSMUSG Hps6       | 5.206155 | 5.183384 | 4.947336 | 5.151291 | 5.860796 | 5.298728  |



|                  |          |          |          |          |          |           |
|------------------|----------|----------|----------|----------|----------|-----------|
| ENSMUSG Rnf181   | 84.62838 | 85.70853 | 93.1027  | 83.10852 | 75.24947 | 82.643785 |
| ENSMUSG Adnp2    | 5.314214 | 4.956923 | 4.968752 | 4.574035 | 4.599887 | 4.664631  |
| ENSMUSG Gm5767   | 0        | 0        | 0.055672 | 0        | 0        | 0         |
| ENSMUSG Gm11596  | 0        | 0        | 0        | 0        | 0        | 0         |
| ENSMUSG Gm11569  | 0        | 0        | 0        | 0        | 0        | 0         |
| ENSMUSG Krtap4-9 | 0        | 0        | 0        | 0        | 0        | 0         |
| ENSMUSG Gm14180  | 0        | 0        | 0        | 0        | 0        | 0         |
| ENSMUSG Gm11214  | 0        | 0        | 0.079571 | 0        | 0        | 0         |
| ENSMUSG Rps27l   | 52.55837 | 53.14481 | 48.37234 | 68.03322 | 65.96465 | 63.165355 |
| ENSMUSG Klh13    | 4.645141 | 4.669688 | 4.697448 | 8.001005 | 7.246936 | 7.253509  |
| ENSMUSG Slc35b4  | 7.694072 | 7.283889 | 7.559331 | 7.234759 | 7.123539 | 6.723432  |
| ENSMUSG Gm9736   | 0        | 0        | 0        | 0        | 0        | 0         |
| ENSMUSG Nars2    | 2.898717 | 2.323114 | 2.250893 | 2.422748 | 2.24046  | 2.054242  |
| ENSMUSG Olfr1220 | 0        | 0        | 0        | 0        | 0        | 0         |
| ENSMUSG Ppp1r14a | 49.68167 | 36.09756 | 55.72937 | 29.39246 | 33.33518 | 31.295849 |
| ENSMUSG Apopt1   | 15.84915 | 13.62107 | 15.64351 | 11.26313 | 12.82    | 14.839235 |
| ENSMUSG Hoxc13   | 0        | 0        | 0        | 0        | 0        | 0         |
| ENSMUSG Hoxc11   | 0        | 0        | 0        | 0        | 0        | 0         |
| ENSMUSG Dzip1l   | 6.640019 | 6.17118  | 6.222909 | 5.278192 | 4.598464 | 4.409423  |
| ENSMUSG Mbl1     | 0.826232 | 0.951244 | 0.893319 | 0.750185 | 0.280961 | 0.558804  |
| ENSMUSG Nlrp9a   | 0        | 0        | 0        | 0        | 0        | 0         |
| ENSMUSG Try4     | 0        | 0        | 0        | 0        | 0        | 0         |
| ENSMUSG Vopp1    | 15.59491 | 15.13142 | 14.84737 | 16.20741 | 15.23306 | 14.220036 |
| ENSMUSG Sel1l    | 30.52469 | 30.64962 | 30.54982 | 43.76894 | 45.52325 | 45.55364  |
| ENSMUSG Tshr     | 0.089632 | 0.08667  | 0.035268 | 0.07508  | 0.025984 | 0.05567   |
| ENSMUSG Gtf2a1   | 6.362809 | 6.473959 | 6.026011 | 6.047421 | 5.783584 | 5.725037  |
| ENSMUSG Ston2    | 3.840422 | 4.396613 | 3.268685 | 4.019502 | 3.254485 | 3.780787  |
| ENSMUSG Zfp26    | 2.644797 | 2.735591 | 2.348752 | 2.710016 | 2.733992 | 2.586969  |
| ENSMUSG Ccl27b   | 0.380264 | 0.172647 | 0.544836 | 0        | 0.125342 | 0         |
| ENSMUSG Olfr344  | 0        | 0        | 0        | 0        | 0        | 0         |
| ENSMUSG Gm21425  | 0        | 0        | 0        | 0        | 0        | 0         |
| ENSMUSG Olfr1510 | 0        | 0        | 0        | 0        | 0        | 0         |
| ENSMUSG Gm3618   | 0        | 0        | 0        | 0        | 0        | 0         |
| ENSMUSG Gm28305  | 0        | 0        | 0        | 0        | 0        | 0         |
| ENSMUSG Sly      | 0        | 0        | 0        | 0        | 0        | 0         |
| ENSMUSG Gm20905  | 0        | 0        | 0        | 0        | 0        | 0         |
| ENSMUSG Gm20894  | 0        | 0        | 0        | 0        | 0        | 0         |
| ENSMUSG Prok2    | 0        | 0        | 0        | 0        | 0        | 0         |
| ENSMUSG Gm20696  | 0.24503  | 0.241157 | 0.20777  | 0.230679 | 0.211596 | 0.078152  |
| ENSMUSG Foxp1    | 33.26208 | 27.06073 | 27.77025 | 20.38784 | 23.47376 | 23.282138 |
| ENSMUSG Frmd4b   | 13.88965 | 13.14323 | 12.93178 | 12.92418 | 12.99883 | 13.191725 |
| ENSMUSG Rpn1     | 53.68313 | 53.78886 | 57.56482 | 67.49575 | 71.6409  | 70.363182 |
| ENSMUSG Uba3     | 20.94153 | 23.47338 | 22.57954 | 21.30674 | 20.50582 | 19.79187  |
| ENSMUSG Hmces    | 8.179147 | 8.254604 | 9.584525 | 9.344278 | 7.289204 | 8.207509  |
| ENSMUSG Katna1   | 10.03082 | 10.5881  | 11.12496 | 10.35374 | 10.76061 | 9.49113   |
| ENSMUSG Vmn2r113 | 0        | 0        | 0        | 0        | 0        | 0         |
| ENSMUSG Jchain   | 22.02229 | 26.12689 | 8.054847 | 2410.441 | 2371.735 | 1943.6035 |
| ENSMUSG Fancf    | 0.922752 | 1.013948 | 0.87995  | 1.202199 | 1.103727 | 0.710177  |
| ENSMUSG Paqr4    | 13.93428 | 13.45678 | 12.39182 | 9.167486 | 9.362797 | 9.768527  |
| ENSMUSG lsg20l2  | 8.24596  | 9.088045 | 8.582545 | 8.589663 | 8.238685 | 8.930835  |
| ENSMUSG Ccdc187  | 2.675913 | 2.703753 | 2.056254 | 2.623258 | 2.23296  | 2.567045  |
| ENSMUSG Fcrl5    | 0.065953 | 0.107998 | 0.049736 | 0.461296 | 0.287395 | 0.621901  |
| ENSMUSG Mtm1     | 6.12551  | 6.591464 | 5.464018 | 7.156771 | 5.790167 | 5.412487  |
| ENSMUSG Zcchc13  | 0        | 0        | 0        | 0        | 0        | 0         |
| ENSMUSG Abcb7    | 5.364968 | 5.156672 | 4.978743 | 5.946718 | 5.632248 | 5.605801  |
| ENSMUSG Gnb3     | 0        | 0.040792 | 0.054909 | 0.075225 | 0        | 0         |
| ENSMUSG Cela3b   | 0        | 0        | 0        | 0        | 0        | 0         |
| ENSMUSG Slc25a13 | 2.627491 | 2.802839 | 2.234212 | 3.211997 | 3.273995 | 3.628371  |
| ENSMUSG Sema6a   | 17.73137 | 16.123   | 16.01243 | 10.09132 | 12.28378 | 9.211047  |
| ENSMUSG Unc5a    | 0.126656 | 0.127437 | 0.090705 | 0.179929 | 0.176753 | 0.147488  |
| ENSMUSG Hk3      | 3.802969 | 4.364383 | 4.099818 | 13.7259  | 12.64467 | 16.284487 |
| ENSMUSG Tspan17  | 21.91564 | 18.70929 | 22.13301 | 18.20231 | 17.6115  | 16.318805 |
| ENSMUSG Thoc3    | 9.73717  | 8.739951 | 9.152939 | 9.110063 | 8.89959  | 9.411839  |
| ENSMUSG Faf2     | 16.7242  | 15.15233 | 13.63292 | 15.98773 | 14.37952 | 15.359823 |

|                   |          |          |          |          |          |           |
|-------------------|----------|----------|----------|----------|----------|-----------|
| ENSMUSG Arl10     | 16.14034 | 16.18521 | 17.78785 | 15.5719  | 14.24833 | 15.433326 |
| ENSMUSG 4833439L1 | 54.19913 | 54.76498 | 52.92437 | 43.27586 | 47.37295 | 46.597239 |
| ENSMUSG Uimc1     | 14.62552 | 14.62266 | 16.77513 | 12.97633 | 12.67977 | 12.661185 |
| ENSMUSG Hivep1    | 12.45856 | 12.28184 | 10.67182 | 10.43382 | 10.27054 | 10.242648 |
| ENSMUSG Edn1      | 24.88775 | 20.91605 | 24.17734 | 8.559251 | 13.07785 | 13.663193 |
| ENSMUSG Elovl2    | 0.011703 | 0.044846 | 0.013198 | 0.040785 | 0.039721 | 0.103892  |
| ENSMUSG Gm14819   | 0        | 0        | 0        | 0        | 0        | 0         |
| ENSMUSG Gcm2      | 0        | 0        | 0        | 0        | 0        | 0         |
| ENSMUSG Gm9       | 0        | 0        | 0        | 0        | 0        | 0         |
| ENSMUSG Gcnt2     | 28.25297 | 27.86233 | 25.5952  | 15.68972 | 16.57021 | 14.788606 |
| ENSMUSG Tmem14c   | 44.66467 | 47.96005 | 46.66187 | 50.47725 | 50.741   | 56.618179 |
| ENSMUSG Tbc1d7    | 2.444617 | 2.7838   | 3.059081 | 2.621298 | 3.342376 | 2.699022  |
| Mus_musc Mus_musc | 0.44282  | 1.272823 | 0.148277 | 1.332408 | 5.499132 | 7.719848  |
| Mus_musc Mus_musc | 2.237039 | 5.219165 | 1.444275 | 106.9514 | 10.5589  | 97.419373 |
| Mus_musc Mus_musc | 0.601451 | 4.060071 | 1.151973 | 8.81144  | 11.15739 | 36.844391 |
| Mus_musc Mus_musc | 1.96517  | 2.931283 | 0.847713 | 384.7147 | 241.4108 | 608.88123 |
| Mus_musc Mus_musc | 0.465028 | 0.153289 | 0.387099 | 37.75882 | 49.21517 | 37.547775 |
| Mus_musc Mus_musc | 0        | 0        | 0        | 9.170026 | 0.070703 | 1.141005  |
| Mus_musc Mus_musc | 3.306492 | 3.446736 | 1.324629 | 376.1733 | 181.9913 | 69.558892 |
| Mus_musc Mus_musc | 2.768138 | 2.575369 | 1.613216 | 409.7328 | 654.3733 | 3702.5825 |
| ENSMUSG Gm11562   | 0        | 0        | 0        | 0        | 0        | 0         |
| ENSMUSG Morf4l1   | 115.0209 | 109.2532 | 115.3944 | 93.24967 | 93.57477 | 95.646735 |
| ENSMUSG Olfr1129  | 0        | 0        | 0        | 0        | 0        | 0         |
| ENSMUSG Fbxw24    | 0        | 0        | 0        | 0        | 0        | 0         |
| ENSMUSG Entpd2    | 3.507883 | 2.841723 | 2.115412 | 3.317998 | 3.198421 | 3.286844  |
| ENSMUSG Cnep1r1   | 19.12294 | 20.42092 | 18.70846 | 14.87551 | 15.74479 | 15.54673  |
| ENSMUSG Entpd8    | 0.303705 | 0.357075 | 0.088798 | 0.40728  | 0.290423 | 0.363001  |
| ENSMUSG Slc6a20a  | 0.982003 | 0.739765 | 0.633264 | 6.469252 | 6.72248  | 7.744781  |
| ENSMUSG Dpp10     | 0        | 0        | 0        | 0.002628 | 0.00288  | 0         |
| ENSMUSG Atoh7     | 0        | 0        | 0        | 0        | 0        | 0         |
| ENSMUSG Sun1      | 37.11318 | 35.53359 | 37.87044 | 25.13517 | 25.25117 | 24.592309 |
| ENSMUSG Jmjd4     | 4.413967 | 4.040147 | 3.394054 | 3.418026 | 3.022731 | 2.871986  |
| ENSMUSG Rabl6     | 23.94    | 21.52357 | 22.91177 | 18.25693 | 20.32715 | 20.603884 |
| ENSMUSG Sepsecs   | 6.046478 | 5.663828 | 5.16485  | 6.378527 | 5.109817 | 5.916367  |
| ENSMUSG Pgm2      | 10.28268 | 10.37412 | 10.87288 | 10.05213 | 9.122825 | 9.638912  |
| ENSMUSG Cenpa     | 4.188183 | 2.720914 | 3.352822 | 7.102201 | 7.371199 | 8.711042  |
| ENSMUSG Anapc4    | 10.36669 | 10.63192 | 10.47716 | 10.60476 | 9.36009  | 10.225204 |
| ENSMUSG Slc35f6   | 11.31678 | 10.53344 | 11.90012 | 13.1828  | 13.37262 | 15.022036 |
| ENSMUSG Tbc1d1    | 10.57484 | 8.598251 | 10.07111 | 8.128363 | 7.81388  | 8.045079  |
| ENSMUSG Zcchc4    | 3.374382 | 3.740586 | 2.979428 | 3.254587 | 3.185206 | 3.569696  |
| ENSMUSG Klf3      | 38.51888 | 38.88175 | 39.05546 | 24.91433 | 25.51182 | 27.692528 |
| ENSMUSG Rps24     | 460.6053 | 485.1496 | 511.4828 | 447.0636 | 449.3482 | 434.40799 |
| ENSMUSG Gadd45gjr | 5.864472 | 5.587343 | 6.728024 | 5.543254 | 6.29214  | 6.460078  |
| ENSMUSG Aco2      | 55.16129 | 61.31919 | 53.34375 | 58.72813 | 60.3995  | 63.236572 |
| ENSMUSG Polr3h    | 3.512139 | 2.837458 | 2.812109 | 2.578203 | 2.498408 | 3.545623  |
| ENSMUSG Hdac7     | 50.30947 | 47.0326  | 52.5047  | 35.89427 | 36.88061 | 35.965237 |
| ENSMUSG Pmm1      | 10.53761 | 11.41259 | 11.34208 | 8.839549 | 10.41507 | 9.982291  |
| ENSMUSG Desi1     | 17.04226 | 13.54813 | 14.416   | 14.17486 | 16.95204 | 16.454082 |
| ENSMUSG Xrcc6     | 4.356593 | 4.977501 | 4.751131 | 5.318606 | 4.83252  | 6.359238  |
| ENSMUSG Vdr       | 1.683089 | 1.682889 | 0.9951   | 3.759386 | 3.458828 | 3.561665  |
| ENSMUSG Kcnh2     | 3.102526 | 4.078923 | 4.56665  | 3.735692 | 3.489054 | 2.979113  |
| ENSMUSG Capn5     | 7.973645 | 6.392926 | 10.94365 | 8.152257 | 8.522964 | 9.16415   |
| ENSMUSG Leng8     | 29.38777 | 23.06444 | 34.47691 | 25.4363  | 20.03897 | 23.248675 |
| ENSMUSG Edem2     | 26.09896 | 25.70878 | 23.79568 | 52.32038 | 55.48791 | 51.119434 |
| ENSMUSG Gc        | 0.267378 | 0.140001 | 0.131697 | 0.094979 | 0.118484 | 0.322658  |
| ENSMUSG Osbpl8    | 12.41641 | 12.85897 | 12.0113  | 11.74435 | 12.8817  | 12.250631 |
| ENSMUSG Nav3      | 0.091411 | 0.116266 | 0.061049 | 0.103079 | 0.079966 | 0.060662  |
| ENSMUSG Snrpd3    | 8.488132 | 9.146873 | 10.66639 | 9.305094 | 8.926439 | 8.689774  |
| ENSMUSG Cpm       | 22.83994 | 25.05991 | 18.30045 | 21.9672  | 18.2866  | 20.808968 |
| ENSMUSG Ddc       | 2.621875 | 2.170462 | 1.987427 | 1.142574 | 0.971994 | 1.166863  |
| ENSMUSG E2f7      | 0.326017 | 0.374753 | 0.299635 | 0.575877 | 0.569569 | 0.663935  |
| ENSMUSG Mdm2      | 21.92295 | 21.22336 | 21.10458 | 25.36776 | 22.96186 | 22.655027 |
| ENSMUSG Csrp2     | 21.71426 | 21.82009 | 18.43276 | 19.22456 | 21.81798 | 20.893846 |
| ENSMUSG Gcgr      | 0.252118 | 0.239704 | 0.250081 | 0.227457 | 0.210923 | 0.172139  |

|                   |          |          |          |          |          |           |
|-------------------|----------|----------|----------|----------|----------|-----------|
| ENSMUSG Lhx1      | 0.060673 | 0        | 0.153144 | 0.019003 | 0.072813 | 0.121238  |
| ENSMUSG Aatf      | 6.705405 | 6.761786 | 6.921468 | 6.469128 | 6.468859 | 6.826668  |
| ENSMUSG Bhlhe22   | 0.356945 | 0.282408 | 0.07684  | 0.403817 | 0.329726 | 0.446861  |
| ENSMUSG Ppp1r27   | 0        | 0        | 0        | 0        | 0        | 0         |
| ENSMUSG 4921511C: | 0        | 0        | 0        | 0        | 0        | 0         |
| ENSMUSG Fam161a   | 6.84817  | 8.8725   | 4.727908 | 10.26764 | 10.01808 | 9.861679  |
| ENSMUSG Alb       | 0.408788 | 0.445479 | 0.093438 | 0.074432 | 0.066178 | 0.081498  |
| ENSMUSG L1td1     | 0.76725  | 0.816552 | 0.425941 | 0.160278 | 0.203064 | 0.277657  |
| ENSMUSG Rsph14    | 1.215038 | 1.037584 | 0.513268 | 2.211    | 2.09704  | 1.877902  |
| ENSMUSG Pcdhga1   | 1.264623 | 1.087056 | 1.161274 | 0.621838 | 0.604752 | 0.683197  |
| Mus_musc Mus_musc | 0.153288 | 0.369235 | 0.141244 | 0.065319 | 0.175646 | 0.138988  |
| ENSMUSG Sc5d      | 8.30867  | 8.761235 | 9.792683 | 9.232943 | 8.640011 | 9.311354  |
| ENSMUSG Oaf       | 1.635806 | 1.644217 | 1.443849 | 1.819588 | 1.954135 | 1.979893  |
| ENSMUSG Pou2f3    | 0        | 0        | 0.056506 | 0.015081 | 0.021459 | 0.021171  |
| ENSMUSG Zfp961    | 4.209205 | 4.016633 | 4.516424 | 4.252834 | 3.660634 | 3.808553  |
| ENSMUSG Usp2      | 5.574147 | 6.644473 | 4.014374 | 3.2503   | 3.797576 | 3.206608  |
| ENSMUSG Thy1      | 7.948279 | 7.258875 | 8.686521 | 13.09448 | 11.62245 | 14.552598 |
| ENSMUSG Nectin1   | 5.22277  | 5.450723 | 6.395637 | 6.183456 | 5.563022 | 6.733224  |
| ENSMUSG Trim29    | 0.777701 | 0.821478 | 0.637819 | 4.175778 | 3.437357 | 4.82046   |
| ENSMUSG Gm20517   | 0        | 0.122072 | 0        | 0        | 0.051306 | 0         |
| ENSMUSG Pgc       | 0.015985 | 0        | 0        | 0.136405 | 0.167122 | 0.084927  |
| ENSMUSG Taf8      | 10.01912 | 11.13226 | 11.70769 | 9.806032 | 9.958203 | 10.752369 |
| ENSMUSG Guca1a    | 0.484402 | 0.340435 | 0.92019  | 1.33811  | 0.777778 | 1.192464  |
| ENSMUSG Bysl      | 4.216719 | 5.691025 | 5.600355 | 4.667388 | 4.625885 | 5.3665    |
| ENSMUSG Slc36a4   | 7.995549 | 8.992028 | 7.576976 | 8.310332 | 9.211936 | 9.511708  |
| ENSMUSG Kbtbd7    | 5.625642 | 5.957057 | 5.416018 | 5.086967 | 4.519025 | 5.129902  |
| ENSMUSG Olfr323   | 0        | 0.00762  | 0        | 0        | 0        | 0         |
| ENSMUSG Arap3     | 59.96134 | 53.4538  | 60.10664 | 36.15685 | 39.31715 | 35.974155 |
| ENSMUSG Trim26    | 21.08139 | 20.68052 | 24.17646 | 18.27496 | 18.13995 | 16.762467 |
| ENSMUSG Olfr980   | 0        | 0        | 0        | 0        | 0        | 0         |
| ENSMUSG Scrt2     | 0        | 0        | 0        | 0        | 0        | 0         |
| ENSMUSG Hdac3     | 15.83743 | 16.05275 | 15.44843 | 15.29775 | 15.49381 | 15.183462 |
| ENSMUSG H2-M5     | 0.612685 | 0.604617 | 0.36887  | 0.536782 | 0.379131 | 0.535755  |
| ENSMUSG AC125199  | 0        | 0        | 0        | 0        | 0        | 0         |
| ENSMUSG Dusp7     | 35.41489 | 32.50409 | 35.27266 | 20.87542 | 19.86551 | 19.998041 |
| ENSMUSG Kik1b26   | 0        | 0        | 0        | 0        | 0        | 0         |
| ENSMUSG Abra      | 0.387929 | 0.376941 | 0.650679 | 0.204917 | 0.076206 | 0.212936  |
| ENSMUSG Tcf712    | 4.391546 | 3.898281 | 4.532225 | 3.358405 | 3.662207 | 3.109898  |
| ENSMUSG Cyp26a1   | 0.085372 | 0        | 0.068985 | 0.07734  | 0        | 0         |
| Mus_musc Mus_musc | 0        | 0.420413 | 0        | 0        | 0.193534 | 0         |
| ENSMUSG Acsl5     | 53.08491 | 53.76991 | 55.30506 | 52.87852 | 50.75774 | 56.490273 |
| ENSMUSG Vti1a     | 8.858468 | 7.769703 | 8.228195 | 8.038751 | 7.722951 | 7.494137  |
| ENSMUSG Ccr2      | 5.684872 | 4.796458 | 10.72911 | 13.68005 | 10.90371 | 12.69288  |
| ENSMUSG Cep55     | 0.422304 | 0.505962 | 0.548874 | 2.084125 | 2.09777  | 2.920049  |
| ENSMUSG Themis    | 0.845771 | 0.395611 | 0.405237 | 0.920577 | 0.717858 | 0.896743  |
| ENSMUSG Slc16a1   | 9.098899 | 7.596158 | 7.324657 | 9.704604 | 9.554675 | 11.878098 |
| ENSMUSG Tex43     | 0        | 0        | 0        | 0        | 0        | 0         |
| ENSMUSG Sec16b    | 0.261332 | 0.327887 | 0.211632 | 0.258621 | 0.314505 | 0.340099  |
| ENSMUSG Atg12     | 10.26549 | 10.65812 | 8.954112 | 10.17103 | 10.15469 | 9.567655  |
| ENSMUSG Astn1     | 0.032558 | 0.058419 | 0.021024 | 0        | 0.023182 | 0.005438  |
| ENSMUSG Prrx1     | 2.294216 | 2.203772 | 1.937992 | 2.266494 | 2.166606 | 2.154554  |
| ENSMUSG Kifap3    | 10.93194 | 10.24839 | 9.036222 | 7.945123 | 8.806272 | 7.496831  |
| ENSMUSG Scyl3     | 5.889419 | 5.724644 | 5.636241 | 5.663491 | 5.671174 | 5.885438  |
| ENSMUSG Sele      | 0.404151 | 0.267286 | 0.377554 | 0.527785 | 0.617264 | 0.80942   |
| ENSMUSG Sell      | 14.80879 | 9.719943 | 19.43233 | 11.10804 | 6.743479 | 6.308455  |
| ENSMUSG Selp      | 0.781304 | 0.937865 | 0.878733 | 1.805718 | 2.194613 | 2.068051  |
| ENSMUSG Wdr83os   | 27.21698 | 25.46863 | 24.43246 | 20.05424 | 20.4061  | 22.005203 |
| ENSMUSG Fbxo3     | 18.00621 | 18.08227 | 17.45158 | 14.90034 | 14.49054 | 15.360068 |
| ENSMUSG Chchd2    | 159.1095 | 178.892  | 175.94   | 178.7389 | 175.2529 | 187.57124 |
| ENSMUSG Ankrd54   | 13.60877 | 11.9181  | 13.42351 | 11.0736  | 11.7879  | 12.208598 |
| ENSMUSG Npat      | 5.323985 | 4.907821 | 4.369698 | 3.856411 | 4.213898 | 4.440812  |
| ENSMUSG Caprin1   | 52.48798 | 54.72335 | 50.98342 | 53.06218 | 50.87085 | 53.152832 |
| ENSMUSG Nat10     | 4.309744 | 3.985938 | 3.662042 | 3.639019 | 4.042608 | 3.726768  |
| ENSMUSG Elf5      | 10.27382 | 11.07114 | 8.816727 | 10.85239 | 11.89227 | 13.634074 |

|                   |          |          |          |          |          |           |
|-------------------|----------|----------|----------|----------|----------|-----------|
| ENSMUSG Cctfl     | 0        | 0        | 0        | 0.018878 | 0        | 0         |
| ENSMUSG Pamr1     | 6.843845 | 6.509707 | 7.764457 | 5.100667 | 5.038607 | 5.777493  |
| ENSMUSG Trim44    | 37.07649 | 38.11375 | 34.57034 | 29.75844 | 27.76896 | 26.474998 |
| ENSMUSG Tmem132l  | 0        | 0        | 0        | 0.019589 | 0.056043 | 0.012279  |
| ENSMUSG Pygb      | 22.46499 | 26.74825 | 22.08281 | 27.26555 | 26.7569  | 30.91428  |
| ENSMUSG Prmt3     | 3.992349 | 4.219254 | 4.253895 | 3.903772 | 4.437871 | 4.813161  |
| ENSMUSG Dbx1      | 0        | 0        | 0        | 0        | 0        | 0         |
| ENSMUSG Slc17a6   | 0        | 0        | 0        | 0        | 0.036643 | 0.013356  |
| ENSMUSG Asb7      | 3.336435 | 3.751276 | 3.432479 | 3.392972 | 3.260003 | 2.848233  |
| ENSMUSG Tmem200l  | 7.590431 | 6.713241 | 7.785861 | 5.090798 | 4.476545 | 4.276617  |
| Mus_musc Mus_musc | 0        | 0        | 0        | 0        | 0.282083 | 0         |
| ENSMUSG Prkag3    | 3.441278 | 2.782758 | 3.28292  | 0.838743 | 0.982135 | 1.35598   |
| ENSMUSG Cryba2    | 0        | 0        | 0        | 0        | 0        | 0         |
| ENSMUSG Gm20807   | 0        | 0        | 0        | 0        | 0        | 0         |
| Mus_musc Mus_musc | 2.165869 | 1.781309 | 2.681528 | 2.121274 | 2.066272 | 2.051913  |
| Mus_musc Mus_musc | 3.692379 | 6.673373 | 6.046181 | 5.79574  | 6.914253 | 5.616141  |
| Mus_musc Mus_musc | 0.275144 | 0.174542 | 0.315426 | 0.761169 | 1.13223  | 1.33052   |
| Mus_musc Mus_musc | 0.128604 | 0.211461 | 0.272384 | 0.217842 | 0        | 0         |
| Mus_musc Mus_musc | 0.374627 | 0        | 0        | 0        | 0        | 0.235505  |
| Mus_musc Mus_musc | 0.342749 | 0.203204 | 0        | 0.265619 | 0        | 0         |
| Mus_musc Mus_musc | 0        | 0        | 0        | 0.040491 | 0.216296 | 0.409037  |
| ENSMUSG Olfr1413  | 0        | 0        | 0        | 0        | 0        | 0         |
| ENSMUSG Rsl1      | 1.661186 | 1.696698 | 1.576401 | 1.492133 | 1.947132 | 1.714297  |
| ENSMUSG Pla2g2a   | 0        | 0        | 0        | 0        | 0        | 0         |
| ENSMUSG Vmn1r89   | 0        | 0        | 0        | 0        | 0        | 0         |
| ENSMUSG Tstd3     | 3.010397 | 3.103004 | 3.550745 | 5.166443 | 5.468457 | 4.424529  |
| ENSMUSG 2010005H  | 0        | 0        | 0        | 0        | 0        | 0         |
| ENSMUSG Gm15085   | 0        | 0        | 0        | 0        | 0        | 0         |
| ENSMUSG Atp5d     | 74.79902 | 83.74984 | 94.2918  | 78.05001 | 94.73321 | 106.24036 |
| ENSMUSG Esp24     | 0        | 0        | 0        | 0        | 0        | 0         |
| ENSMUSG Efna2     | 1.51934  | 1.489001 | 1.34483  | 1.052263 | 1.464155 | 1.039083  |
| ENSMUSG Hd1bp     | 55.91486 | 57.17361 | 52.15192 | 63.44051 | 70.17773 | 71.405799 |
| ENSMUSG Nlrp4b    | 0        | 0        | 0        | 0        | 0        | 0         |
| ENSMUSG Ccdc174   | 8.448861 | 8.795465 | 10.98737 | 7.876448 | 6.62821  | 6.955005  |
| ENSMUSG Ubp1      | 23.14105 | 24.53367 | 25.41576 | 23.34755 | 22.84852 | 24.959932 |
| ENSMUSG C2cd4a    | 0        | 0.029534 | 0.159369 | 0.057257 | 0        | 0.028651  |
| ENSMUSG Fam69c    | 0        | 0.021358 | 0.047393 | 0        | 0        | 0         |
| ENSMUSG Cyp4      | 0        | 0        | 0        | 0        | 0        | 0         |
| ENSMUSG Prrg1     | 5.338938 | 5.512848 | 4.530667 | 4.060095 | 4.405709 | 3.425076  |
| ENSMUSG Gm11444   | 0        | 0.04589  | 0        | 0.079896 | 0        | 0         |
| Mus_musc Mus_musc | 0.314365 | 0.190476 | 0.021117 | 0.029909 | 0.118871 | 0.077704  |
| Mus_musc Mus_musc | 0        | 0        | 0        | 0.225265 | 0        | 0.39907   |
| Mus_musc Mus_musc | 0.345264 | 0.372147 | 0.331919 | 0.569159 | 0.68875  | 0.498859  |
| Mus_musc Mus_musc | 0        | 0.154309 | 0        | 0.522048 | 0        | 0         |
| Mus_musc Mus_musc | 0        | 0        | 0        | 0.696065 | 0        | 0         |
| Mus_musc Mus_musc | 0        | 0.064745 | 0        | 0        | 0        | 0         |
| Mus_musc Mus_musc | 0.721083 | 0.891281 | 1.396911 | 0.532719 | 0.816339 | 0.503037  |
| Mus_musc Mus_musc | 0.11514  | 0        | 0.072997 | 0.390569 | 0.301599 | 0         |
| ENSMUSG Ina       | 0        | 0        | 0        | 0        | 0        | 0         |
| ENSMUSG Fam151b   | 5.151988 | 4.155861 | 3.754624 | 4.469641 | 4.650285 | 4.647621  |
| ENSMUSG Zbed4     | 4.328148 | 4.181912 | 3.106916 | 3.503469 | 3.568271 | 5.831256  |
| ENSMUSG Smpd4     | 5.782071 | 4.813102 | 5.511376 | 5.167156 | 4.300491 | 4.506103  |
| ENSMUSG Ccl28     | 0.518444 | 0.54099  | 0.219483 | 0.717142 | 1.172468 | 0.31489   |
| ENSMUSG Nr2c1     | 5.239247 | 5.205075 | 4.263486 | 4.138738 | 3.784308 | 3.727982  |
| ENSMUSG Trh       | 0        | 0        | 0        | 0        | 0        | 0         |
| ENSMUSG Nr2c2     | 12.8145  | 12.01176 | 10.07801 | 9.520952 | 10.07305 | 9.78948   |
| ENSMUSG Gm5689    | 0        | 0.044613 | 0        | 0        | 0        | 0         |
| ENSMUSG Prl4a1    | 0        | 0        | 0        | 0        | 0        | 0         |
| ENSMUSG Pttg1ip   | 114.297  | 115.8191 | 125.2054 | 90.26501 | 95.52721 | 90.61311  |
| ENSMUSG Trpm2     | 0.952591 | 0.59877  | 1.217332 | 0.939227 | 0.721894 | 0.789869  |
| ENSMUSG Ube2g2    | 31.05839 | 34.55535 | 40.92405 | 31.47635 | 29.2636  | 31.306685 |
| Mus_musc Mus_musc | 0.053723 | 0        | 0        | 0.063972 | 0.191315 | 0.253651  |
| Mus_musc Mus_musc | 6.547903 | 9.379912 | 5.461513 | 7.667148 | 7.12023  | 9.096062  |
| Mus_musc Mus_musc | 0        | 0        | 0        | 0        | 0.321883 | 0         |

|                   |          |          |          |          |          |           |
|-------------------|----------|----------|----------|----------|----------|-----------|
| Mus_musc Mus_musc | 0        | 0.288022 | 0        | 0        | 0        | 0         |
| Mus_musc Mus_musc | 0        | 0        | 0        | 0.075636 | 0.250247 | 0.142198  |
| Mus_musc Mus_musc | 1.29837  | 1.272362 | 0.620446 | 0.488309 | 0.608539 | 0.34008   |
| Mus_musc Mus_musc | 0        | 0        | 0.337872 | 0        | 0        | 0         |
| Mus_musc Mus_musc | 0        | 0        | 0        | 0.174016 | 0        | 0         |
| Mus_musc Mus_musc | 0        | 0.095034 | 0        | 0.236139 | 0.065089 | 0         |
| Mus_musc Mus_musc | 0.476708 | 0.871138 | 0.293171 | 0.319283 | 0.289254 | 0.321738  |
| Mus_musc Mus_musc | 0        | 0        | 0.096353 | 0.388257 | 0.109998 | 0.138834  |
| Mus_musc Mus_musc | 0        | 0        | 0        | 0        | 0.186692 | 0         |
| Mus_musc Mus_musc | 0.505379 | 0.134208 | 0        | 0.200685 | 0.154504 | 0         |
| Mus_musc Mus_musc | 0        | 0        | 0        | 0        | 0.186692 | 0         |
| ENSMUSG Prl2b1    | 0        | 0        | 0        | 0        | 0        | 0         |
| ENSMUSG Prl6a1    | 0        | 0        | 0        | 0        | 0        | 0         |
| ENSMUSG Dusp22    | 6.765947 | 6.369233 | 7.667804 | 7.375008 | 7.249015 | 7.187405  |
| Mus_musc Mus_musc | 0.257791 | 0.203847 | 0.388169 | 1.139242 | 0.897738 | 0.629516  |
| Mus_musc Mus_musc | 3.117424 | 0.419176 | 0.077257 | 205.5251 | 406.2145 | 221.58655 |
| Mus_musc Mus_musc | 0.587025 | 0.06273  | 0.274693 | 88.54459 | 75.56719 | 42.057957 |
| Mus_musc Mus_musc | 0        | 0.43145  | 0.076606 | 2.440328 | 2.3038   | 10.644647 |
| Mus_musc Mus_musc | 0.502388 | 0.22867  | 0.186914 | 0.716468 | 0.669314 | 4.274077  |
| Mus_musc Mus_musc | 3.667961 | 3.600366 | 0.821844 | 432.3594 | 623.1947 | 130.08359 |
| Mus_musc Mus_musc | 1.61681  | 0.420397 | 0.665783 | 50.45077 | 34.09126 | 51.57963  |
| Mus_musc Mus_musc | 2.311589 | 2.525007 | 0.99172  | 228.8519 | 605.8068 | 92.2239   |
| ENSMUSG Olfr218   | 0        | 0        | 0        | 0        | 0        | 0         |
| Mus_musc Mus_musc | 0.484387 | 0.424147 | 0.181256 | 0.481236 | 0.585163 | 0.782222  |
| Mus_musc Mus_musc | 0        | 0        | 0        | 0.154452 | 0        | 0         |
| Mus_musc Mus_musc | 0.057593 | 0        | 0.089786 | 0        | 0        | 0         |
| Mus_musc Mus_musc | 0.117378 | 0.20599  | 0.276876 | 0.389555 | 0.253072 | 0.206274  |
| Mus_musc Mus_musc | 0        | 0        | 0        | 0        | 0        | 0.35196   |
| Mus_musc Mus_musc | 0        | 0        | 0        | 0.348032 | 0        | 0         |
| Mus_musc Mus_musc | 0        | 0.483588 | 0.387886 | 0        | 0.102865 | 0.17328   |
| ENSMUSG Eef2k     | 4.467701 | 3.938774 | 3.791943 | 4.268825 | 4.212376 | 4.598263  |
| ENSMUSG Xkr6      | 0.872367 | 0.875359 | 0.676434 | 0.442174 | 0.571511 | 0.4912    |
| ENSMUSG Zc4h2     | 2.496776 | 2.779722 | 2.882649 | 2.508883 | 2.18133  | 2.24933   |
| ENSMUSG Oma1      | 8.756865 | 9.948879 | 8.918285 | 9.722505 | 8.316242 | 9.496988  |
| ENSMUSG Olig3     | 0.032034 | 0.092422 | 0.035548 | 0.025195 | 0.013515 | 0.079737  |
| ENSMUSG Susd4     | 5.534663 | 4.778181 | 5.053138 | 5.105305 | 4.275677 | 4.800224  |
| ENSMUSG Med6      | 13.20222 | 14.14084 | 15.91617 | 12.762   | 12.75175 | 11.115926 |
| ENSMUSG Glb1      | 9.574909 | 8.695742 | 8.668699 | 17.09972 | 18.11391 | 18.961012 |
| ENSMUSG Zfp553    | 4.801472 | 5.151515 | 4.228768 | 3.89403  | 5.005157 | 4.321831  |
| ENSMUSG Gm17018   | 10.28798 | 11.65982 | 11.69928 | 12.79754 | 12.63519 | 13.535411 |
| ENSMUSG Irgq      | 7.648425 | 6.914795 | 6.421962 | 6.018447 | 6.112755 | 6.998896  |
| ENSMUSG Msmg      | 0        | 0        | 0        | 0        | 0        | 0         |
| Mus_musc Mus_musc | 24.37733 | 20.19994 | 56.79571 | 34.86912 | 27.71107 | 33.263427 |
| Mus_musc Mus_musc | 0.362874 | 0.108172 | 0.366462 | 0.12974  | 0.226035 | 0.131862  |
| Mus_musc Mus_musc | 0.340147 | 0.446844 | 0.552907 | 0        | 0.547852 | 0         |
| ENSMUSG Tomm5     | 28.12476 | 28.34323 | 30.91916 | 37.17876 | 30.55503 | 36.634114 |
| Mus_musc Mus_musc | 0        | 0        | 0        | 0        | 0.295745 | 0         |
| Mus_musc Mus_musc | 0.043454 | 0        | 0        | 0.398563 | 0        | 0.038632  |
| Mus_musc Mus_musc | 0.114933 | 0.223425 | 0        | 0.789121 | 0.267032 | 0.590602  |
| ENSMUSG Olfr361   | 0        | 0        | 0        | 0        | 0        | 0         |
| ENSMUSG Bora      | 0.697429 | 0.890605 | 0.981271 | 1.259614 | 1.369849 | 1.467123  |
| ENSMUSG Fbxw9     | 8.451653 | 8.033833 | 7.636347 | 8.243228 | 6.955    | 8.266198  |
| ENSMUSG Mcm9      | 3.298297 | 4.234678 | 3.010027 | 3.566299 | 3.208087 | 3.181227  |
| ENSMUSG Spock2    | 109.3096 | 91.17666 | 110.4959 | 67.39417 | 63.85908 | 69.716576 |
| ENSMUSG Prp2      | 0        | 0        | 0        | 0        | 0        | 0         |
| ENSMUSG Espl1     | 0.499216 | 0.573524 | 0.543575 | 1.29618  | 1.52577  | 1.868522  |
| ENSMUSG Zfp68     | 13.80227 | 10.62134 | 13.12052 | 10.14371 | 7.922304 | 10.829928 |
| ENSMUSG Pard6b    | 40.0161  | 33.72931 | 32.89846 | 21.27438 | 20.94025 | 19.220503 |
| ENSMUSG Zbtb7c    | 0.411702 | 0.955051 | 0.314739 | 0.44858  | 0.562064 | 0.832537  |
| ENSMUSG Csrnp3    | 0        | 0        | 0        | 0        | 0        | 0         |
| ENSMUSG Krtap4-2  | 0        | 0        | 0        | 0        | 0        | 0         |
| ENSMUSG Srr       | 9.092278 | 8.681117 | 8.465988 | 7.103845 | 7.073683 | 6.915159  |
| Mus_musc Mus_musc | 0.357704 | 0.304876 | 0.645592 | 0.287321 | 0.095088 | 0.402735  |
| Mus_musc Mus_musc | 0.717781 | 0.362414 | 0.181096 | 0.302515 | 0.297693 | 0.260529  |

|                   |          |          |          |          |          |           |
|-------------------|----------|----------|----------|----------|----------|-----------|
| Mus_musc Mus_musc | 0.141398 | 0.073676 | 0.102616 | 0        | 0.300702 | 0.063513  |
| Mus_musc Mus_musc | 0.093487 | 0.180867 | 0.188509 | 0.435222 | 0.392705 | 0.200139  |
| Mus_musc Mus_musc | 0.122908 | 0.478675 | 0.273951 | 0.047972 | 0        | 0         |
| Mus_musc Mus_musc | 0.162895 | 0.049561 | 0.244899 | 0.124168 | 0.062555 | 0.086977  |
| Mus_musc Mus_musc | 0        | 0        | 0        | 0        | 0        | 0.184186  |
| ENSMUSG Kcnj2     | 8.710753 | 4.652441 | 4.992957 | 4.433992 | 4.649545 | 4.713395  |
| ENSMUSG Rasl12    | 21.22485 | 23.36525 | 23.2455  | 15.93142 | 15.85645 | 16.804542 |
| ENSMUSG Cox6a1    | 198.3437 | 222.7753 | 257.2102 | 239.5585 | 217.9576 | 228.76141 |
| ENSMUSG H2-M10.3  | 0        | 0        | 0        | 0        | 0        | 0         |
| ENSMUSG Tpm3-rs7  | 117.0546 | 106.9188 | 125.3042 | 110.1532 | 108.6964 | 102.21111 |
| ENSMUSG Ptges     | 3.031652 | 3.350335 | 3.404988 | 7.12593  | 7.33941  | 8.689446  |
| ENSMUSG Slco1a1   | 0        | 0        | 0        | 0        | 0        | 0         |
| ENSMUSG Arhgap42  | 8.045476 | 8.17172  | 6.990863 | 5.145451 | 4.841595 | 4.867027  |
| ENSMUSG Vamp8     | 181.2447 | 193.431  | 193.5085 | 154.4507 | 140.1622 | 146.53602 |
| ENSMUSG Tex45     | 0.134175 | 0.098632 | 0.0708   | 0.056747 | 0        | 0.034257  |
| ENSMUSG Arhgap9   | 12.05262 | 10.45973 | 14.59031 | 18.02913 | 14.53565 | 17.440419 |
| ENSMUSG Suclg2    | 10.7186  | 11.08834 | 9.013976 | 9.163653 | 8.84726  | 9.564064  |
| ENSMUSG Dcaf17    | 3.107015 | 2.944267 | 2.832076 | 2.911556 | 2.722757 | 2.686553  |
| ENSMUSG Znrf3     | 3.881036 | 4.529848 | 4.704389 | 3.80955  | 3.846961 | 3.938451  |
| ENSMUSG Gucy2g    | 0.081124 | 0.180529 | 0.091885 | 0.0805   | 0.092183 | 0.094938  |
| Mus_musc Mus_musc | 13.58479 | 8.657952 | 10.00986 | 11.53076 | 17.18748 | 14.013837 |
| Mus_musc Mus_musc | 0        | 0        | 0        | 0        | 0.186692 | 0         |
| Mus_musc Mus_musc | 0        | 0        | 0        | 0        | 0        | 0.184186  |
| Mus_musc Mus_musc | 0.174601 | 0        | 0.379141 | 0.287872 | 0.133618 | 0.148138  |
| Mus_musc Mus_musc | 0.58884  | 0.384483 | 0.730991 | 1.543934 | 1.802419 | 2.121871  |
| Mus_musc Mus_musc | 6.269525 | 6.081932 | 3.172504 | 3.171242 | 3.089594 | 4.920108  |
| Mus_musc Mus_musc | 0        | 0.191545 | 0.103642 | 0        | 0        | 0.097555  |
| ENSMUSG Gata2     | 48.83436 | 52.08206 | 53.1823  | 26.067   | 30.00725 | 24.577109 |
| ENSMUSG B3galt4   | 3.018738 | 3.116465 | 2.732702 | 4.78159  | 5.122223 | 4.844215  |
| ENSMUSG Tspan6    | 7.629869 | 5.312304 | 5.358387 | 4.639132 | 3.174404 | 4.04328   |
| ENSMUSG Reg1      | 0        | 0        | 0        | 0        | 0.223039 | 0         |
| ENSMUSG Stfa2l1   | 2.971704 | 0.91849  | 2.416311 | 0.889601 | 0        | 0.337162  |
| ENSMUSG Rps17     | 275.6417 | 293.917  | 304.8624 | 337.5    | 289.4374 | 299.94513 |
| ENSMUSG Cfd       | 7.890051 | 21.43448 | 0.257252 | 21.51637 | 6.112049 | 16.504824 |
| ENSMUSG Fbll1     | 0        | 0        | 0        | 0        | 0        | 0.036764  |
| ENSMUSG Lingo3    | 0        | 0        | 0        | 0        | 0        | 0         |
| ENSMUSG Mb21d2    | 6.513888 | 6.331479 | 6.130198 | 4.483807 | 5.264174 | 4.392857  |
| ENSMUSG Tsen15    | 8.272388 | 6.815894 | 9.53406  | 7.463189 | 7.027329 | 6.854801  |
| ENSMUSG Ccdc144b  | 0        | 0.008199 | 0.011281 | 0.026411 | 0        | 0.009318  |
| ENSMUSG Yipf6     | 20.52748 | 22.26882 | 20.23191 | 20.76256 | 20.12507 | 21.8892   |
| ENSMUSG Zdhhc17   | 9.003247 | 9.181112 | 9.092357 | 7.763956 | 6.921283 | 6.656448  |
| ENSMUSG Fgf18     | 8.834384 | 9.186073 | 9.542565 | 7.487284 | 6.488252 | 8.321592  |
| ENSMUSG Twist1    | 0.103949 | 0.099713 | 0.028537 | 0.131047 | 0.116855 | 0.117209  |
| Mus_musc Mus_musc | 0.421946 | 0.407822 | 0.416143 | 0.746449 | 0.385146 | 0.685626  |
| ENSMUSG Itpk1     | 10.60564 | 9.693941 | 10.95381 | 10.73467 | 11.41084 | 13.115245 |
| Mus_musc Mus_musc | 0.145067 | 0.401951 | 0.135331 | 0.198809 | 0.383924 | 0.262911  |
| ENSMUSG Sema3b    | 31.21917 | 26.05402 | 30.46025 | 16.87901 | 14.95748 | 16.966385 |
| Mus_musc Mus_musc | 0        | 0        | 0.168936 | 0        | 0        | 0         |
| Mus_musc Mus_musc | 0.391085 | 0.196394 | 0        | 0.045541 | 0        | 0         |
| Mus_musc Mus_musc | 0.197545 | 0.270866 | 0.197616 | 0.102845 | 0.399515 | 0.216761  |
| ENSMUSG AF067063  | 0.007011 | 0        | 0        | 0        | 0        | 0         |
| ENSMUSG AI987944  | 5.526093 | 5.817668 | 6.956158 | 5.911016 | 6.78506  | 5.948332  |
| ENSMUSG Gpr50     | 0        | 0        | 0.016514 | 0.033907 | 0        | 0         |
| ENSMUSG Rps6kb2   | 8.071423 | 7.716886 | 7.171865 | 7.476028 | 7.122322 | 6.408786  |
| ENSMUSG Als2cr12  | 0.188508 | 0.081007 | 0.163069 | 0.233008 | 0.151711 | 0.190787  |
| ENSMUSG Tas2r123  | 0        | 0        | 0        | 0        | 0        | 0         |
| Mus_musc Mus_musc | 2.53816  | 2.285691 | 1.493234 | 1.635969 | 0.891026 | 0.792538  |
| Mus_musc Mus_musc | 0        | 0        | 0        | 0        | 0.135428 | 0         |
| Mus_musc Mus_musc | 0.138785 | 0.202072 | 0.474011 | 0.158718 | 0.091636 | 0.321145  |
| Mus_musc Mus_musc | 0        | 0        | 0        | 0.14453  | 0        | 0         |
| Mus_musc Mus_musc | 0        | 0        | 0        | 0.164857 | 0        | 0.326494  |
| Mus_musc Mus_musc | 0.289418 | 0.116952 | 0.233188 | 0.100771 | 0.2342   | 0.125155  |
| Mus_musc Mus_musc | 7.520161 | 8.331422 | 6.918524 | 6.267821 | 6.205501 | 6.334606  |
| Mus_musc Mus_musc | 0.49272  | 0.521476 | 1.134324 | 0.349613 | 0.47879  | 0.37131   |

|                    |          |          |          |          |          |           |
|--------------------|----------|----------|----------|----------|----------|-----------|
| Mus_musc Mus_musc  | 0.153864 | 0        | 0        | 0.124806 | 0        | 0.095529  |
| Mus_musc Mus_musc  | 0        | 0        | 0        | 0.065554 | 0.074677 | 0.213454  |
| Mus_musc Mus_musc  | 2.623538 | 2.025025 | 1.898932 | 1.299815 | 1.426614 | 1.282492  |
| Mus_musc Mus_musc  | 0.72923  | 0.510103 | 0.572553 | 0.793213 | 0.525319 | 0.249874  |
| ENSMUSG Gpr179     | 1.178689 | 1.219661 | 0.944166 | 0.613691 | 0.8962   | 0.684683  |
| ENSMUSG Krtap9-1   | 0        | 0        | 0        | 0        | 0        | 0         |
| ENSMUSG Esp4       | 0        | 0        | 0        | 0        | 0        | 0         |
| ENSMUSG Vmn1r148   | 0        | 0        | 0        | 0        | 0        | 0         |
| ENSMUSG Cfap54     | 1.160752 | 1.170544 | 0.690089 | 1.539953 | 1.467367 | 1.607764  |
| ENSMUSG Zfp969     | 3.221924 | 6.343512 | 3.12482  | 3.645871 | 2.700485 | 5.062382  |
| ENSMUSG Gm10719    | 0        | 0        | 0        | 0        | 0        | 0         |
| ENSMUSG Gm10230    | 0        | 0        | 0        | 0        | 0        | 0         |
| ENSMUSG Cfhr1      | 0        | 0        | 0        | 0        | 0        | 0         |
| ENSMUSG Tmem235    | 0        | 0        | 0        | 0        | 0        | 0         |
| ENSMUSG Isoc2b     | 0.443789 | 0.877562 | 0.887071 | 0.314357 | 0.416946 | 0.113923  |
| ENSMUSG Plekhg3    | 5.597561 | 6.268022 | 5.509181 | 4.832628 | 5.019563 | 5.046107  |
| ENSMUSG Cggbp1     | 37.20367 | 37.25597 | 34.713   | 28.48418 | 31.47393 | 31.114864 |
| ENSMUSG Ywhab      | 103.4015 | 97.87799 | 100.2175 | 74.47949 | 79.36167 | 78.425026 |
| ENSMUSG Tomm34     | 12.3044  | 11.35673 | 11.17203 | 11.94664 | 11.03579 | 10.855915 |
| ENSMUSG Olfr507    | 0        | 0        | 0        | 0        | 0        | 0         |
| ENSMUSG Spcs1      | 74.97759 | 81.664   | 82.32948 | 104.0293 | 110.7786 | 103.22443 |
| ENSMUSG Glt8d1     | 13.03373 | 14.43799 | 15.88696 | 12.08348 | 12.46842 | 13.274864 |
| ENSMUSG Parg       | 8.928368 | 8.558807 | 8.57785  | 8.276616 | 8.597947 | 8.623953  |
| ENSMUSG Nisch      | 87.52572 | 80.73497 | 88.74275 | 68.51103 | 64.0171  | 69.736882 |
| ENSMUSG Ogdhl      | 0.091465 | 0.213496 | 0.043334 | 0.171539 | 0.2064   | 0.262501  |
| ENSMUSG Chat       | 0        | 0        | 0        | 0        | 0        | 0         |
| ENSMUSG Nek4       | 2.558618 | 3.327382 | 2.629018 | 2.863637 | 2.939837 | 3.477378  |
| Mus_musc Mus_musc  | 0.232625 | 0.302035 | 0.527297 | 0.206626 | 0.889131 | 0.666374  |
| ENSMUSG Camkmt     | 2.974375 | 2.589493 | 2.101746 | 2.486687 | 2.676606 | 3.021174  |
| ENSMUSG Gm10309    | 1.340415 | 1.297583 | 1.307928 | 0.478567 | 1.037935 | 0.618425  |
| ENSMUSG Slitrk5    | 0        | 0.019165 | 0.01675  | 0.010806 | 0        | 0         |
| ENSMUSG Vmn1r93    | 0        | 0        | 0        | 0        | 0        | 0         |
| ENSMUSG Eefsec     | 5.930979 | 4.119982 | 4.426203 | 4.156035 | 4.099987 | 3.670318  |
| ENSMUSG Slc9c1     | 0        | 0        | 0        | 0        | 0        | 0.026168  |
| ENSMUSG AA467197   | 0.131697 | 0.214985 | 0.359369 | 16.44392 | 11.64362 | 14.877099 |
| ENSMUSG Gm9758     | 0        | 0        | 0        | 0.203839 | 0        | 0         |
| ENSMUSG Olfr1564   | 0        | 0.017767 | 0        | 0        | 0        | 0.003637  |
| ENSMUSG Atf5       | 31.54838 | 28.33485 | 34.10921 | 27.26506 | 27.56731 | 24.343364 |
| ENSMUSG Ubn2       | 6.384396 | 7.032682 | 5.996922 | 5.824696 | 5.636718 | 5.543182  |
| ENSMUSG Rgs4       | 5.559107 | 5.509198 | 4.285872 | 4.111006 | 4.958043 | 4.244112  |
| ENSMUSG Cbfa2t2    | 4.757767 | 5.372052 | 4.949984 | 4.251662 | 4.563303 | 4.679052  |
| ENSMUSG Olfr175-ps | 0        | 0        | 0        | 0        | 0        | 0         |
| ENSMUSG Zfp280d    | 7.279223 | 8.137533 | 7.911001 | 6.410319 | 6.65767  | 5.972077  |
| ENSMUSG Osbp17     | 5.407526 | 4.091455 | 5.121211 | 4.464087 | 4.452561 | 4.466921  |
| ENSMUSG Mc3r       | 0        | 0        | 0        | 0        | 0        | 0         |
| ENSMUSG Il4ra      | 40.34715 | 37.86502 | 36.97654 | 30.73013 | 31.18708 | 34.343238 |
| ENSMUSG Lat        | 5.276067 | 3.916283 | 7.38472  | 8.157867 | 7.437143 | 8.749625  |
| ENSMUSG Spns1      | 21.25182 | 23.54566 | 24.76471 | 19.90179 | 21.53764 | 22.87837  |
| ENSMUSG Dgat2      | 4.726389 | 7.970416 | 3.468643 | 4.138346 | 3.314161 | 2.917911  |
| ENSMUSG Rps3       | 211.981  | 229.9808 | 228.6281 | 261.8144 | 249.4882 | 260.0256  |
| ENSMUSG Il21r      | 2.465975 | 1.102673 | 2.09094  | 4.599771 | 3.935774 | 5.034925  |
| ENSMUSG Chst12     | 17.73957 | 14.56108 | 17.60929 | 17.14234 | 16.78718 | 15.325642 |
| ENSMUSG Ccdc113    | 5.752404 | 7.325078 | 3.386462 | 7.302531 | 6.45741  | 5.70434   |
| ENSMUSG Arhgap21   | 19.5379  | 18.88338 | 18.00951 | 14.64704 | 14.20608 | 13.96653  |
| ENSMUSG H2-Aa      | 146.6617 | 133.4119 | 234.7817 | 343.8049 | 284.8869 | 348.29668 |
| ENSMUSG Cpz        | 0.52163  | 0.633665 | 0.396341 | 0.812179 | 1.044729 | 1.382012  |
| ENSMUSG Gm8374     | 0        | 0        | 0        | 0        | 0        | 0         |
| ENSMUSG Vmn2r105   | 0        | 0        | 0        | 0        | 0        | 0         |
| ENSMUSG Lsp1       | 56.08157 | 44.54101 | 60.43787 | 58.01308 | 50.07614 | 50.283033 |
| ENSMUSG Vmn2r96    | 0        | 0        | 0        | 0.020264 | 0.009171 | 0.005781  |
| ENSMUSG Hmcn1      | 12.76095 | 8.700514 | 8.078499 | 6.518733 | 6.449676 | 8.733679  |
| ENSMUSG Dppa2      | 0.057324 | 0        | 0        | 0        | 0.021744 | 0         |
| ENSMUSG Vsig8      | 0.219353 | 0        | 0.242101 | 0.203389 | 0.139009 | 0.22039   |
| ENSMUSG Lce1h      | 0        | 0        | 0        | 0        | 0        | 0         |

|                  |          |          |          |          |          |           |
|------------------|----------|----------|----------|----------|----------|-----------|
| ENSMUSG Gm2115   | 0.178783 | 0.332022 | 0.190511 | 0.130136 | 0.153826 | 0.149385  |
| ENSMUSG AC122413 | 0        | 0        | 0        | 0.035914 | 0        | 0         |
| ENSMUSG Sec13    | 44.08887 | 41.27791 | 45.10483 | 43.15916 | 42.91487 | 46.923046 |
| ENSMUSG H2-M10.5 | 0        | 0        | 0        | 0        | 0        | 0         |
| ENSMUSG Clic4    | 267.0389 | 252.0123 | 269.2453 | 173.8556 | 195.0782 | 172.00568 |
| ENSMUSG Med21    | 19.40821 | 19.98913 | 26.58276 | 20.18478 | 18.76974 | 17.172974 |
| ENSMUSG Smco2    | 0        | 0        | 0.03204  | 0        | 0        | 0         |
| ENSMUSG Zfp804b  | 0        | 0        | 0        | 0        | 0        | 0.022618  |
| ENSMUSG Gm9195   | 0        | 0        | 0        | 0        | 0        | 0         |
| ENSMUSG Rhox2e   | 0        | 0        | 0        | 0        | 0        | 0         |
| ENSMUSG Olfr1280 | 0        | 0        | 0        | 0        | 0        | 0         |
| ENSMUSG L3mbtl2  | 7.393428 | 7.778836 | 7.409145 | 7.423937 | 7.360185 | 7.182121  |
| ENSMUSG Zc3h7b   | 32.08201 | 30.88541 | 28.80436 | 20.65992 | 20.82949 | 20.28558  |
| ENSMUSG Rangap1  | 20.55061 | 21.28726 | 21.03005 | 18.41496 | 21.15018 | 21.028216 |
| ENSMUSG Esp36    | 0        | 0        | 0        | 0        | 0        | 0         |
| ENSMUSG Gbp6     | 2.39362  | 3.06329  | 19.3191  | 13.53744 | 3.013638 | 3.902179  |
| ENSMUSG Gm20388  | 0        | 0        | 0        | 0        | 0        | 0         |
| ENSMUSG Olfr1324 | 0        | 0        | 0        | 0        | 0        | 0         |
| ENSMUSG Mcmbp    | 14.11385 | 14.9197  | 14.27856 | 11.45455 | 12.92106 | 11.669874 |
| ENSMUSG Slc5a1   | 1.112473 | 1.049164 | 0.711578 | 5.377498 | 5.792058 | 6.882996  |
| ENSMUSG Usp31    | 4.772823 | 5.539646 | 4.698241 | 4.134266 | 3.890617 | 4.219965  |
| ENSMUSG Asb8     | 11.12581 | 10.91351 | 12.98327 | 11.97184 | 11.44045 | 10.619166 |
| ENSMUSG 4-Mar    | 1.068513 | 1.565292 | 0.708582 | 1.808384 | 2.127874 | 1.7222    |
| ENSMUSG Porcn    | 11.23951 | 10.9828  | 8.818099 | 7.242844 | 6.959108 | 8.720995  |
| ENSMUSG Wdr17    | 0        | 0        | 0        | 0.039965 | 0        | 0         |
| ENSMUSG Churc1   | 17.49352 | 20.51696 | 19.16454 | 20.30337 | 19.72055 | 18.358166 |
| ENSMUSG Hlx      | 19.35626 | 14.05806 | 19.46459 | 9.910365 | 10.05713 | 10.326154 |
| ENSMUSG Was      | 6.493488 | 6.378287 | 8.799824 | 13.33264 | 10.87121 | 13.669121 |
| ENSMUSG Rbm3     | 104.1721 | 72.97843 | 88.94621 | 80.9131  | 72.02131 | 73.864565 |
| ENSMUSG Wdr13    | 16.08381 | 17.00624 | 15.20059 | 15.31216 | 14.50139 | 15.584561 |
| ENSMUSG Hdac6    | 3.39863  | 2.76505  | 3.115348 | 3.203906 | 3.343606 | 3.567198  |
| ENSMUSG Eras     | 0        | 0        | 0        | 0        | 0        | 0         |
| ENSMUSG Glod5    | 0.112316 | 0        | 0        | 0        | 0        | 0         |
| ENSMUSG Gata1    | 0.370626 | 0.277465 | 0.408484 | 0.850864 | 1.163521 | 1.273393  |
| ENSMUSG Vmn1r86  | 0        | 0        | 0        | 0        | 0        | 0         |
| ENSMUSG Vmn1r85  | 0        | 0        | 0        | 0        | 0        | 0         |
| ENSMUSG Zswim9   | 2.524969 | 2.92236  | 2.202576 | 2.315018 | 1.997256 | 2.322039  |
| ENSMUSG Vmn1r87  | 0        | 0        | 0        | 0        | 0        | 0         |
| ENSMUSG Sult2a6  | 0        | 0        | 0        | 0        | 0        | 0         |
| ENSMUSG Sult2a2  | 0        | 0        | 0        | 0        | 0        | 0         |
| ENSMUSG Klc1     | 62.01136 | 59.02968 | 66.54759 | 44.89473 | 45.70611 | 47.001928 |
| ENSMUSG Scn10a   | 0.016634 | 0.017654 | 0.037185 | 0        | 0        | 0.016404  |
| ENSMUSG Fbxo16   | 0.530634 | 0.311475 | 0.209819 | 0.607067 | 0.502826 | 0.761517  |
| ENSMUSG Ppp1r13b | 27.34655 | 25.57127 | 24.06855 | 17.35114 | 17.3032  | 17.347662 |
| ENSMUSG Xrcc3    | 3.218849 | 2.685428 | 4.296459 | 3.141064 | 2.544799 | 2.958232  |
| ENSMUSG Zfyve21  | 60.00735 | 55.82081 | 62.03235 | 32.49036 | 35.09921 | 33.893002 |
| ENSMUSG Tnfaip2  | 14.96178 | 11.47881 | 16.35994 | 12.42055 | 9.889076 | 11.379075 |
| ENSMUSG Zfp418   | 1.63577  | 1.495441 | 1.126076 | 1.344362 | 1.103643 | 1.396503  |
| ENSMUSG Eif5     | 54.65238 | 51.70648 | 52.16571 | 55.43556 | 57.24482 | 52.147887 |
| ENSMUSG Smoc1    | 0.902381 | 0.986161 | 0.318405 | 0.642094 | 0.469788 | 0.398614  |
| ENSMUSG Slc10a1  | 0.059237 | 0.033615 | 0.129314 | 0.149839 | 0.066024 | 0.116788  |
| ENSMUSG Srsf5    | 114.9292 | 81.10592 | 112.0429 | 90.80255 | 64.13662 | 68.562363 |
| ENSMUSG Susd6    | 46.19438 | 44.58127 | 44.97756 | 38.79854 | 41.63436 | 40.510852 |
| ENSMUSG Erh      | 23.85746 | 22.53568 | 26.37163 | 27.99404 | 27.18888 | 29.327409 |
| ENSMUSG Galnt16  | 0.511006 | 0.528696 | 0.43141  | 0.974845 | 0.960262 | 0.862022  |
| ENSMUSG Lyst     | 8.659023 | 8.592978 | 7.738504 | 9.483057 | 11.36038 | 10.148671 |
| ENSMUSG Gm20498  | 0.789468 | 0.219818 | 0.052236 | 0        | 0.337352 | 0.276256  |
| ENSMUSG Slc13a1  | 0        | 0        | 0        | 0        | 0        | 0         |
| ENSMUSG Rbm28    | 15.11494 | 13.98943 | 13.48703 | 11.76562 | 10.1588  | 12.941032 |
| ENSMUSG Lrwd1    | 7.325903 | 6.718715 | 5.997386 | 7.755243 | 7.432389 | 8.853761  |
| ENSMUSG Glyr1    | 39.64108 | 40.57301 | 38.1589  | 38.39394 | 40.07963 | 38.044368 |
| ENSMUSG Cux1     | 28.17899 | 30.52121 | 25.85719 | 24.7757  | 28.62968 | 27.900704 |
| ENSMUSG Mefv     | 0.524445 | 0.312456 | 0.897185 | 0.958836 | 1.03785  | 1.075605  |
| ENSMUSG Fscn3    | 0        | 0        | 0        | 0        | 0        | 0         |



|                  |          |          |          |          |          |           |
|------------------|----------|----------|----------|----------|----------|-----------|
| ENSMUSG Gcc1     | 9.302041 | 9.11802  | 10.12033 | 8.045442 | 9.069988 | 8.841128  |
| ENSMUSG Tmsb15b2 | 0.189987 | 0.062112 | 0.263645 | 0.284302 | 0.206909 | 0.23816   |
| ENSMUSG Lsg1     | 7.034859 | 7.842186 | 6.324561 | 6.543035 | 5.571609 | 6.038992  |
| ENSMUSG G6pd2    | 0        | 0        | 0        | 0        | 0        | 0         |
| ENSMUSG Phf6     | 5.854884 | 6.418749 | 5.902794 | 5.924138 | 6.207919 | 6.329907  |
| ENSMUSG Atg9b    | 0.073053 | 0.055558 | 0.081272 | 0.106125 | 0.08853  | 0.120258  |
| ENSMUSG Galnt18  | 68.77563 | 67.17256 | 74.49893 | 49.53192 | 48.45776 | 45.822739 |
| ENSMUSG Smg6     | 8.7116   | 10.19453 | 8.990554 | 9.10735  | 8.661233 | 9.171988  |
| ENSMUSG Snx25    | 46.15031 | 45.64486 | 42.39557 | 40.76237 | 45.52954 | 40.247638 |
| ENSMUSG Ccdc155  | 0.396179 | 0.654196 | 0.45502  | 0.405636 | 0.441228 | 0.691553  |
| ENSMUSG Pdzk1    | 0        | 0        | 0        | 0        | 0.01761  | 0.013201  |
| ENSMUSG Wdr36    | 8.364697 | 8.667055 | 8.237383 | 7.336511 | 9.169164 | 6.646188  |
| ENSMUSG Ssh1     | 9.198536 | 8.495795 | 8.559374 | 8.950355 | 8.54785  | 9.285061  |
| ENSMUSG Brms1l   | 8.692761 | 8.054484 | 8.873094 | 8.113544 | 8.046376 | 7.482094  |
| ENSMUSG Lce1f    | 0        | 0        | 0        | 0        | 0        | 0         |
| ENSMUSG Rassf4   | 9.57006  | 11.09357 | 9.918081 | 13.67188 | 13.68696 | 15.567828 |
| ENSMUSG Sh2d2a   | 1.344779 | 1.079881 | 2.103433 | 2.469737 | 1.596179 | 2.646376  |
| ENSMUSG Naxe     | 53.33683 | 55.02086 | 54.98826 | 50.14118 | 48.1547  | 53.469032 |
| ENSMUSG Pear1    | 16.57317 | 13.09581 | 15.48759 | 9.535076 | 10.64092 | 9.351682  |
| ENSMUSG Ntrk1    | 0.057398 | 0.04627  | 0.015147 | 0.526822 | 0.339552 | 0.353569  |
| ENSMUSG Cd1d1    | 5.768294 | 4.645019 | 5.681021 | 4.682735 | 3.871516 | 4.629738  |
| ENSMUSG Dclk2    | 0.875644 | 1.041377 | 1.339553 | 1.2657   | 0.892439 | 1.107481  |
| ENSMUSG Ylpm1    | 9.868985 | 9.841895 | 8.976433 | 8.054616 | 9.167465 | 8.890565  |
| ENSMUSG Dld      | 24.537   | 24.81889 | 26.50137 | 25.53872 | 27.88071 | 23.775122 |
| ENSMUSG Pomc     | 0.266814 | 0.355222 | 0.294788 | 0.230576 | 0.262383 | 0.196901  |
| ENSMUSG Dnmt3a   | 6.949395 | 7.520582 | 6.663856 | 11.60649 | 12.0307  | 13.147087 |
| ENSMUSG Kif3c    | 7.004701 | 6.426588 | 8.024296 | 4.715912 | 5.046339 | 4.529325  |
| ENSMUSG Sh3yl1   | 3.023706 | 3.724805 | 3.399575 | 2.633511 | 3.141819 | 2.768635  |
| ENSMUSG Cib2     | 4.451543 | 3.738362 | 4.868144 | 4.524177 | 4.620799 | 3.843876  |
| ENSMUSG 4930512M | 0        | 0        | 0        | 0        | 0        | 0         |
| ENSMUSG Tarbp1   | 2.672644 | 2.549867 | 2.130802 | 1.701329 | 2.134678 | 1.986191  |
| ENSMUSG Adig     | 0.40879  | 1.489464 | 0.304727 | 0.887978 | 0.446348 | 1.116483  |
| ENSMUSG Sowahd   | 0        | 0        | 0        | 0        | 0        | 0         |
| ENSMUSG Sptssa   | 39.19816 | 37.52073 | 39.40666 | 37.09572 | 34.46118 | 33.165015 |
| ENSMUSG Arfgap1  | 11.66932 | 11.06063 | 12.28852 | 12.61537 | 11.22086 | 10.884671 |
| ENSMUSG Nkain4   | 27.60373 | 28.63036 | 25.70423 | 14.74834 | 12.30613 | 14.648792 |
| ENSMUSG Chrna4   | 0        | 0        | 0.152335 | 0        | 0.143167 | 0.068138  |
| ENSMUSG Col9a3   | 0.230996 | 0.058816 | 0.156346 | 0.138592 | 0.100211 | 0.169916  |
| ENSMUSG Gid8     | 19.01646 | 18.09795 | 17.72111 | 18.49523 | 18.77586 | 17.533973 |
| ENSMUSG Srms     | 2.34687  | 2.674453 | 2.136759 | 2.159376 | 2.750907 | 2.232809  |
| ENSMUSG Gm11937  | 0        | 0        | 0        | 0        | 0        | 0         |
| ENSMUSG Cd300c   | 0        | 0        | 0.14029  | 0        | 0        | 0         |
| ENSMUSG Lin9     | 2.481093 | 2.173357 | 2.558073 | 2.468932 | 2.5503   | 1.98143   |
| ENSMUSG Vmn1r177 | 0        | 0        | 0        | 0        | 0        | 0         |
| ENSMUSG Podxl2   | 2.966025 | 2.554472 | 2.89703  | 2.76791  | 2.12549  | 2.182214  |
| ENSMUSG Lpcat2b  | 0        | 0.048478 | 0.085743 | 0        | 0.019193 | 0.037804  |
| ENSMUSG Cst10    | 0        | 0        | 0        | 0        | 0        | 0         |
| ENSMUSG Abhd10   | 3.123941 | 1.934627 | 2.957206 | 2.798604 | 2.264592 | 2.566321  |
| ENSMUSG Cnppd1   | 26.35574 | 25.32321 | 26.17392 | 21.87504 | 24.28137 | 22.500628 |
| ENSMUSG Tubgcp5  | 7.249843 | 7.079512 | 6.998461 | 5.919332 | 5.964114 | 6.62152   |
| ENSMUSG Atp6v1h  | 26.2099  | 26.28067 | 26.30108 | 27.50043 | 30.11008 | 28.53628  |
| ENSMUSG Olfr165  | 0        | 0        | 0        | 0        | 0.107707 | 0.007221  |
| ENSMUSG Polr1b   | 2.707408 | 2.557431 | 2.342491 | 2.151872 | 1.85658  | 2.62675   |
| ENSMUSG Ttl      | 13.31484 | 14.47475 | 13.53515 | 9.586616 | 11.13382 | 10.120228 |
| ENSMUSG Slc20a1  | 11.24469 | 10.03503 | 13.08545 | 9.114617 | 8.701215 | 10.142064 |
| ENSMUSG Il1a     | 8.084828 | 6.173231 | 8.949722 | 6.661451 | 5.338985 | 6.736654  |
| ENSMUSG Il1b     | 15.54088 | 11.64472 | 21.15116 | 13.744   | 11.74537 | 9.998012  |
| ENSMUSG Por      | 126.9056 | 119.509  | 95.67989 | 94.39555 | 86.91435 | 97.963929 |
| ENSMUSG Ndufs3   | 32.04185 | 36.04014 | 40.58976 | 42.451   | 39.20461 | 39.090569 |
| ENSMUSG Atf3     | 22.8798  | 4.768421 | 10.06869 | 18.6617  | 19.75754 | 24.700825 |
| ENSMUSG Slc9b1   | 0        | 0.04805  | 0.021793 | 0.070288 | 0        | 0.026628  |
| ENSMUSG Nek2     | 1.764069 | 2.067323 | 0.957235 | 5.482344 | 5.983759 | 5.910854  |
| ENSMUSG Lpgat1   | 17.39844 | 18.59871 | 15.90483 | 18.03283 | 18.57333 | 18.690866 |
| ENSMUSG Mark1    | 1.689877 | 1.877119 | 2.250261 | 1.823336 | 1.886075 | 2.127349  |

|          |          |          |          |          |          |          |           |
|----------|----------|----------|----------|----------|----------|----------|-----------|
| ENSMUSG  | 1-Mar    | 0.087213 | 0.18895  | 0.176227 | 0.107267 | 0.150843 | 0.082781  |
| ENSMUSG  | Ppp2r5a  | 65.4827  | 69.97845 | 65.20137 | 56.50837 | 57.22401 | 54.192853 |
| ENSMUSG  | Tmem206  | 6.23618  | 6.540453 | 5.892382 | 6.461725 | 6.560915 | 7.172685  |
| ENSMUSG  | Ccr6     | 2.39866  | 2.592963 | 2.992029 | 8.255553 | 8.164903 | 6.14263   |
| ENSMUSG  | Kcnd3    | 0.50611  | 0.344543 | 0.306013 | 0.224019 | 0.253112 | 0.239601  |
| ENSMUSG  | Foxa3    | 0.142616 | 0.199761 | 0        | 0.788156 | 0.856109 | 0.995709  |
| ENSMUSG  | Gm6465   | 0        | 0        | 0        | 0        | 0        | 0         |
| ENSMUSG  | Ldlrad2  | 0        | 0        | 0        | 0        | 0        | 0         |
| ENSMUSG  | Gm867    | 6.986    | 5.733541 | 3.647743 | 8.04983  | 8.497508 | 8.91433   |
| ENSMUSG  | Slbp     | 16.17482 | 15.25892 | 18.11455 | 16.53793 | 16.06483 | 16.597822 |
| ENSMUSG  | Kdm4b    | 11.28383 | 10.70445 | 11.74451 | 8.815567 | 9.023042 | 9.01134   |
| Mus_musc | Mus_musc | 0        | 0        | 0.121583 | 0.322985 | 0.109257 | 0.068721  |
| Mus_musc | Mus_musc | 0        | 0.989967 | 0        | 0        | 0        | 0.14091   |
| Mus_musc | Mus_musc | 0        | 0        | 0        | 0.225021 | 0        | 0         |
| Mus_musc | Mus_musc | 0        | 0        | 0        | 0        | 0        | 0.224343  |
| Mus_musc | Mus_musc | 0.456671 | 0.346937 | 0.339893 | 0.225638 | 0.25467  | 0.27693   |
| Mus_musc | Mus_musc | 0.166042 | 0.105881 | 0.451168 | 0        | 0        | 0.103742  |
| Mus_musc | Mus_musc | 0.247654 | 0.128891 | 0.203837 | 0.368217 | 0.297145 | 0.35118   |
| ENSMUSG  | Greb1l   | 0.098536 | 0.122832 | 0.099155 | 0.210493 | 0.182746 | 0.304572  |
| ENSMUSG  | Gm28490  | 0        | 0        | 0        | 0        | 0        | 0         |
| ENSMUSG  | Gm4969   | 0        | 0        | 0.012859 | 0        | 0        | 0.027711  |
| ENSMUSG  | Gm21256  | 0        | 0        | 0        | 0        | 0        | 0         |
| ENSMUSG  | Pitpnb   | 35.96103 | 37.47377 | 35.24712 | 27.92714 | 28.50831 | 27.600948 |
| ENSMUSG  | Gm8122   | 0        | 0        | 0        | 0        | 0        | 0         |
| ENSMUSG  | Arl14    | 0        | 0.036906 | 0        | 0        | 0        | 0         |
| Mus_musc | Mus_musc | 0.494946 | 0.137922 | 0.21661  | 0.202078 | 0.107206 | 0.351711  |
| ENSMUSG  | Gm43720  | 0.264557 | 0.062677 | 0.289705 | 0.298456 | 0.342159 | 0.243256  |
| Mus_musc | Mus_musc | 0.275774 | 0        | 0.620736 | 0.796294 | 0.12456  | 0         |
| Mus_musc | Mus_musc | 0.214046 | 0.204286 | 0        | 0        | 0.106352 | 0         |
| Mus_musc | Mus_musc | 1.539487 | 1.472098 | 2.166723 | 1.864429 | 0.982221 | 1.414092  |
| Mus_musc | Mus_musc | 0        | 0        | 0        | 0        | 0        | 0         |
| Mus_musc | Mus_musc | 0        | 0        | 0.337872 | 0        | 0        | 0         |
| Mus_musc | Mus_musc | 0.228188 | 0        | 0.250399 | 0        | 0        | 0         |
| ENSMUSG  | Gm20924  | 0        | 0        | 0        | 0        | 0        | 0         |
| ENSMUSG  | Nupr1l   | 2.574866 | 1.719918 | 2.113296 | 3.212135 | 3.120186 | 2.782345  |
| ENSMUSG  | Sirpb1a  | 2.447181 | 2.492237 | 3.860282 | 5.055155 | 3.994869 | 3.640873  |
| ENSMUSG  | Tspan31  | 28.2865  | 30.71861 | 34.87263 | 30.63637 | 33.07734 | 31.572845 |
| ENSMUSG  | Mettl1   | 2.409287 | 2.152641 | 2.448395 | 3.191281 | 3.086093 | 3.418604  |
| ENSMUSG  | B4galnt1 | 26.26245 | 26.52285 | 27.01271 | 41.11546 | 39.5867  | 44.397612 |
| ENSMUSG  | Ccdc88b  | 3.763885 | 3.186925 | 5.167358 | 7.074089 | 5.375979 | 6.8452    |
| Mus_musc | Mus_musc | 0        | 0        | 0        | 0        | 0.186692 | 0         |
| Mus_musc | Mus_musc | 0.336309 | 0.553116 | 0.089697 | 1.133562 | 0.996017 | 0.99538   |
| Mus_musc | Mus_musc | 0.173912 | 0.486809 | 0.098391 | 0.239671 | 0.121042 | 0.252328  |
| ENSMUSG  | Tigd4    | 0.008808 | 0.00687  | 0        | 0        | 0        | 0.052716  |
| Mus_musc | Mus_musc | 0.175291 | 0.33196  | 0.498161 | 1.053773 | 1.367223 | 1.173592  |
| Mus_musc | Mus_musc | 0.320843 | 0.544966 | 0.064153 | 1.638542 | 17.95604 | 45.397491 |
| Mus_musc | Mus_musc | 4.533398 | 4.897858 | 1.240685 | 435.8841 | 3684.451 | 1010.2493 |
| Mus_musc | Mus_musc | 0        | 0        | 0        | 0.448819 | 0.810337 | 67.392784 |
| Mus_musc | Mus_musc | 0        | 0.571416 | 0        | 1.461192 | 2.043614 | 75.37571  |
| Mus_musc | Mus_musc | 0.740883 | 0.745591 | 0.671852 | 254.9734 | 230.4556 | 113.57401 |
| Mus_musc | Mus_musc | 0.235894 | 0.359521 | 0        | 4.955039 | 1.859828 | 34.280502 |
| Mus_musc | Mus_musc | 1.108873 | 0        | 0        | 72.08485 | 73.22037 | 22.578323 |
| Mus_musc | Mus_musc | 0.103874 | 0        | 0        | 3.21466  | 6.304079 | 37.590157 |
| Mus_musc | Mus_musc | 0        | 0        | 0        | 0        | 0        | 0         |
| ENSMUSG  | Acyp1    | 10.25488 | 9.795138 | 9.206131 | 11.72879 | 9.35627  | 11.345617 |
| ENSMUSG  | Cox8c    | 0        | 0.067721 | 0        | 0        | 0        | 0         |
| ENSMUSG  | Jdp2     | 24.61945 | 29.58693 | 26.02032 | 15.86454 | 19.04384 | 20.307969 |
| ENSMUSG  | Thoc5    | 10.62601 | 11.523   | 11.08044 | 10.28313 | 10.45308 | 10.469839 |
| ENSMUSG  | Igsf9b   | 0.19085  | 0.36724  | 0.255434 | 0.411779 | 0.389563 | 0.473472  |
| ENSMUSG  | Pcdhb19  | 0.422109 | 0.596635 | 0.39988  | 0.330406 | 0.382879 | 0.316146  |
| ENSMUSG  | Olf131   | 0        | 0        | 0        | 0        | 0        | 0         |
| ENSMUSG  | Dnajc17  | 6.823899 | 6.277217 | 5.817674 | 5.119485 | 5.117052 | 5.051693  |
| ENSMUSG  | Olf1571  | 0        | 0        | 0        | 0        | 0        | 0         |
| ENSMUSG  | Olf130   | 0        | 0        | 0        | 0        | 0        | 0         |

|                   |          |          |          |          |          |           |
|-------------------|----------|----------|----------|----------|----------|-----------|
| ENSMUSG Snd1      | 31.38302 | 30.44915 | 30.02519 | 39.99139 | 40.97455 | 41.504978 |
| ENSMUSG Tmem79    | 1.82318  | 2.432227 | 2.499196 | 2.163058 | 3.129731 | 2.523315  |
| ENSMUSG Olfr815   | 0        | 0        | 0        | 0        | 0        | 0         |
| ENSMUSG Vmn1r230  | 0        | 0        | 0        | 0        | 0        | 0         |
| ENSMUSG 1190002N  | 32.28072 | 31.92495 | 32.72717 | 20.81956 | 19.91402 | 18.680309 |
| ENSMUSG Akr1e1    | 1.995044 | 2.831417 | 2.232295 | 2.935285 | 2.237316 | 2.18912   |
| ENSMUSG 2410002F2 | 9.845398 | 8.89534  | 8.394764 | 7.98588  | 6.702354 | 6.278466  |
| ENSMUSG Mecr      | 5.226908 | 7.331596 | 6.266619 | 6.139263 | 6.034075 | 6.202888  |
| ENSMUSG Srsf4     | 40.74816 | 39.25298 | 40.73819 | 32.70013 | 30.61974 | 30.161605 |
| ENSMUSG Plekhn2   | 11.22758 | 11.15605 | 11.34009 | 14.91238 | 14.83954 | 14.847769 |
| ENSMUSG Casp9     | 7.309877 | 7.588661 | 6.484038 | 6.736465 | 7.567264 | 7.235981  |
| ENSMUSG Arhgef19  | 3.862476 | 4.486898 | 3.074057 | 4.25271  | 4.125256 | 4.449626  |
| ENSMUSG Gast      | 0        | 0        | 0        | 0        | 0        | 0         |
| ENSMUSG Cntnap1   | 0.477858 | 0.628103 | 0.844901 | 0.621148 | 0.61382  | 0.865218  |
| Mus_musc Mus_musc | 0.852383 | 0.702254 | 0.69896  | 0.277764 | 0.278341 | 0.322813  |
| ENSMUSG Olfr215   | 0        | 0        | 0        | 0        | 0        | 0         |
| Mus_musc Mus_musc | 0.106937 | 0        | 0        | 0        | 0.186692 | 0         |
| Mus_musc Mus_musc | 0.939318 | 0.730465 | 0.80656  | 0.931006 | 1.205755 | 1.064534  |
| Mus_musc Mus_musc | 2.101239 | 2.633516 | 2.169058 | 2.121349 | 1.335098 | 1.90404   |
| Mus_musc Mus_musc | 2.853804 | 2.710727 | 2.150669 | 1.454235 | 1.130464 | 1.415551  |
| ENSMUSG Arpp19    | 19.37308 | 18.84688 | 17.78298 | 16.58981 | 13.02345 | 13.884296 |
| ENSMUSG Psmc3ip   | 2.94846  | 2.499763 | 2.725094 | 3.499257 | 3.112265 | 3.354926  |
| ENSMUSG Atp6v0a1  | 30.18261 | 24.65955 | 25.61824 | 34.84176 | 33.70368 | 37.6837   |
| ENSMUSG Hsd17b1   | 0.189717 | 0.236551 | 0.253199 | 0.260439 | 0.262959 | 0.156677  |
| ENSMUSG Gm11567   | 0        | 0        | 0        | 0        | 0        | 0         |
| ENSMUSG Zfp341    | 1.347996 | 1.559885 | 1.346436 | 1.618373 | 1.276231 | 1.275346  |
| ENSMUSG Fkbp7     | 19.33551 | 17.08651 | 16.41709 | 13.73206 | 14.09802 | 12.37212  |
| ENSMUSG Gm9922    | 0.149128 | 0.078041 | 0.316901 | 0.950888 | 0.268236 | 0.552559  |
| ENSMUSG Prkra     | 8.848177 | 11.61019 | 9.59836  | 10.34523 | 9.036304 | 10.048763 |
| ENSMUSG Ppfia2    | 0.05654  | 0.121691 | 0.077167 | 0.16592  | 0.065072 | 0.10032   |
| ENSMUSG Magea5    | 0        | 0        | 0        | 0        | 0        | 0         |
| ENSMUSG C1s2      | 3.2484   | 3.976034 | 3.244009 | 4.372934 | 4.28501  | 5.518751  |
| ENSMUSG Lipo1     | 0.071172 | 0        | 0        | 0        | 0        | 0         |
| ENSMUSG Lipo4     | 0        | 0        | 0        | 0        | 0        | 0         |
| Mus_musc Mus_musc | 0.284067 | 0.097649 | 0.040749 | 0.267822 | 0.379219 | 0.101806  |
| Mus_musc Mus_musc | 0        | 0.515125 | 0.371088 | 0.179535 | 0.079334 | 0.308405  |
| ENSMUSG Gm10197   | 0        | 0        | 0        | 0        | 0        | 0         |
| ENSMUSG Pfdn5     | 117.6332 | 120.4013 | 127.1359 | 109.9823 | 107.8748 | 102.98518 |
| ENSMUSG Rarg      | 35.28824 | 39.23018 | 38.17774 | 27.94937 | 22.86549 | 27.163213 |
| ENSMUSG Asb18     | 0.011442 | 0.03624  | 0        | 0        | 0        | 0         |
| ENSMUSG Ces1b     | 0.221923 | 0.067019 | 0.068899 | 0.388081 | 0.243537 | 0.17387   |
| ENSMUSG Sp1       | 19.05288 | 18.70987 | 16.81493 | 16.2787  | 16.05878 | 15.238661 |
| ENSMUSG Hsbp111   | 0.1234   | 0        | 0        | 0.295452 | 0.163113 | 0.209952  |
| ENSMUSG Myg1      | 12.12249 | 11.31268 | 10.87096 | 10.95418 | 10.61502 | 11.354412 |
| ENSMUSG Adgre5    | 295.8916 | 266.5793 | 327.4469 | 188.8226 | 212.3304 | 187.19642 |
| ENSMUSG Nab1      | 22.8241  | 22.62629 | 25.13598 | 21.92282 | 21.42273 | 19.840936 |
| ENSMUSG Gm10251   | 0        | 0        | 0        | 0        | 0        | 0         |
| ENSMUSG Polr3d    | 5.38615  | 6.401006 | 6.621009 | 6.227738 | 6.673829 | 6.832159  |
| ENSMUSG 1-Sep     | 11.49774 | 7.522281 | 12.95289 | 17.21155 | 12.73212 | 16.496293 |
| Mus_musc Mus_musc | 0        | 0        | 0.308433 | 0        | 0        | 0         |
| ENSMUSG Fsbp      | 0.108227 | 0.0185   | 0.137614 | 0.070656 | 0.180267 | 0.09829   |
| ENSMUSG Pdgfb     | 44.92891 | 42.15602 | 46.45864 | 26.30669 | 22.03532 | 24.316112 |
| Mus_musc Mus_musc | 0.368762 | 0.353646 | 0.335456 | 0.384552 | 0.468766 | 0.281424  |
| Mus_musc Mus_musc | 0.352651 | 0.8677   | 0.42955  | 0.345312 | 0.676094 | 0.188658  |
| ENSMUSG Tmem86a   | 6.822635 | 6.141526 | 5.799834 | 11.01852 | 11.0901  | 11.088998 |
| Mus_musc Mus_musc | 13.92034 | 13.75914 | 16.28792 | 13.13204 | 12.39115 | 11.439661 |
| ENSMUSG Apol10a   | 0        | 0.027575 | 0        | 0.05746  | 0        | 0.018218  |
| ENSMUSG Mtmr14    | 12.62551 | 11.04389 | 12.02039 | 11.30119 | 13.2867  | 12.660488 |
| ENSMUSG 4930578G  | 0        | 0.300468 | 0.12593  | 0.108018 | 0        | 0         |
| ENSMUSG Carhsp1   | 58.94384 | 61.74177 | 71.09599 | 40.12817 | 43.08488 | 40.748905 |
| ENSMUSG Dsp       | 13.91695 | 15.30872 | 11.05737 | 10.38879 | 10.60235 | 10.885762 |
| ENSMUSG Tatdn2    | 18.17646 | 17.43548 | 18.54493 | 18.22803 | 18.55346 | 18.728234 |
| ENSMUSG Thumpd3   | 8.019575 | 9.325558 | 9.187833 | 9.585714 | 9.367548 | 9.931047  |
| ENSMUSG Olfr315   | 0        | 0        | 0        | 0        | 0        | 0         |

|                         |          |          |          |          |          |           |
|-------------------------|----------|----------|----------|----------|----------|-----------|
| ENSMUSG Gimap1          | 31.3982  | 25.22211 | 34.51602 | 32.84171 | 30.08062 | 29.372631 |
| Mus_musc Mus_musc       | 0.441745 | 0        | 0.771925 | 0.40418  | 0.610794 | 0.50364   |
| ENSMUSG Gm15446         | 2.307397 | 2.18036  | 2.403125 | 2.735663 | 1.892539 | 2.251859  |
| Mus_musc Mus_musc       | 0.218864 | 0.110796 | 0.281312 | 0.135858 | 0.153178 | 0.229617  |
| Mus_musc Mus_musc       | 0        | 0.360675 | 0.159777 | 0        | 0.185568 | 0.114284  |
| Mus_musc Mus_musc       | 0.147102 | 0        | 0.224787 | 0        | 0.464426 | 0         |
| Mus_musc Mus_musc       | 0.384757 | 0.374499 | 0.648271 | 0.445198 | 0.212149 | 0         |
| Mus_musc Mus_musc       | 0.105636 | 0.065885 | 0.189183 | 0        | 0.08985  | 0         |
| ENSMUSG Fbxl22          | 0.243838 | 0.367633 | 0.430093 | 0.902483 | 0.928066 | 0.948082  |
| ENSMUSG Olfr1323        | 0        | 0        | 0        | 0        | 0        | 0         |
| ENSMUSG Pcdh20          | 0.036164 | 0.038099 | 0.029784 | 0.018328 | 0.010544 | 0.084575  |
| Mus_musc Mus_musc       | 0.111323 | 0.28705  | 0.105201 | 0.130117 | 0        | 0.046884  |
| ENSMUSG Ndp             | 0        | 0.047749 | 0.026138 | 0.019026 | 0        | 0.018998  |
| ENSMUSG 9430038I0       | 3.077872 | 5.21775  | 4.953208 | 5.047409 | 3.906724 | 5.382858  |
| ENSMUSG Abcc8           | 0.064926 | 0.278928 | 0.017839 | 0.203168 | 0.408759 | 0.343671  |
| ENSMUSG Rdh7            | 0        | 0        | 0        | 0        | 0        | 0         |
| ENSMUSG Svs2            | 0        | 0        | 0        | 0        | 0        | 0         |
| ENSMUSG Gpr176          | 0.04239  | 0.059207 | 0.011395 | 0.340311 | 0.25818  | 0.353917  |
| ENSMUSG Spn             | 9.486093 | 6.213822 | 14.19196 | 12.77777 | 9.60225  | 10.95561  |
| ENSMUSG Hspb3           | 0        | 0        | 0        | 0        | 0        | 0         |
| ENSMUSG Mettl7a2        | 3.625085 | 3.943123 | 7.520043 | 1.586799 | 2.63727  | 1.994677  |
| ENSMUSG Chn1            | 6.480961 | 6.590749 | 8.195528 | 4.524758 | 4.097449 | 4.082787  |
| ENSMUSG Cd248           | 4.389139 | 4.536512 | 3.745301 | 2.248955 | 2.438523 | 3.754234  |
| ENSMUSG Gm11437         | 0        | 0        | 0        | 0        | 0        | 0         |
| ENSMUSG Crebzf          | 20.24438 | 24.59125 | 26.55602 | 22.78214 | 21.01812 | 18.837301 |
| ENSMUSG Olfr705         | 0        | 0        | 0        | 0        | 0        | 0         |
| ENSMUSG St8sia5         | 0        | 0        | 0        | 0        | 0        | 0         |
| ENSMUSG Rnf165          | 0.092857 | 0.07392  | 0.065654 | 0.099499 | 0.100072 | 0.021068  |
| ENSMUSG Hdhd2           | 13.33446 | 13.76519 | 12.96607 | 12.71831 | 13.77561 | 13.128881 |
| ENSMUSG Katnal2         | 0.855144 | 0.50817  | 0.359616 | 1.216556 | 0.929168 | 0.926606  |
| ENSMUSG Pias2           | 9.352813 | 11.72258 | 9.462137 | 8.85182  | 9.065332 | 8.772711  |
| ENSMUSG Agap2           | 1.413931 | 1.022635 | 2.248097 | 2.261571 | 2.16175  | 2.672788  |
| ENSMUSG Gdap111         | 0        | 0        | 0.020477 | 0.019124 | 0.030625 | 0.137749  |
| ENSMUSG Pstpip2         | 3.107506 | 2.923469 | 4.847499 | 5.997819 | 5.30494  | 6.036093  |
| ENSMUSG Atp5a1          | 185.5237 | 201.7962 | 186.7697 | 192.7169 | 202.7913 | 215.56853 |
| ENSMUSG Cd2ap           | 23.89711 | 23.70609 | 20.73419 | 18.77655 | 18.03516 | 17.927438 |
| ENSMUSG Pla2g4a         | 6.161392 | 7.684325 | 5.449778 | 8.483245 | 8.019629 | 9.060097  |
| ENSMUSG Spata31         | 0        | 0        | 0        | 0        | 0        | 0         |
| ENSMUSG Spock1          | 0        | 0        | 0        | 0        | 0.016509 | 0.021955  |
| ENSMUSG Ric8b           | 9.271381 | 11.73822 | 11.08168 | 7.245642 | 7.827887 | 8.622063  |
| ENSMUSG Cars2           | 7.109367 | 5.870626 | 7.838714 | 6.273878 | 7.151905 | 7.556565  |
| ENSMUSG Rgs9            | 8.534068 | 7.258772 | 7.726863 | 5.152936 | 5.234091 | 4.449746  |
| ENSMUSG Olfr998         | 0        | 0        | 0        | 0        | 0        | 0         |
| ENSMUSG Olfr1245        | 0        | 0        | 0        | 0        | 0        | 0         |
| ENSMUSG Pum2            | 36.87481 | 39.15848 | 34.68013 | 34.42638 | 34.25577 | 33.473757 |
| ENSMUSG Ccdc194         | 0.09948  | 0.229005 | 0.096535 | 0.167599 | 0.139426 | 0.186716  |
| ENSMUSG Olfr1293- $\mu$ | 0        | 0        | 0        | 0        | 0        | 0         |
| ENSMUSG Pcdha8          | 0.071409 | 0.013512 | 0        | 0.011993 | 0        | 0         |
| ENSMUSG Hsd17b6         | 0        | 0        | 0        | 0        | 0        | 0         |
| ENSMUSG Prim1           | 2.763613 | 3.744722 | 3.365624 | 3.05045  | 3.146867 | 3.482862  |
| ENSMUSG Rubcn           | 13.31712 | 13.05717 | 12.92121 | 10.90705 | 11.24305 | 11.732744 |
| ENSMUSG Atp5b           | 240.8896 | 262.9706 | 251.7426 | 255.2846 | 268.1579 | 277.01279 |
| ENSMUSG Siglec15        | 0        | 0        | 0        | 0.191327 | 0        | 0.10723   |
| ENSMUSG Vmn2r14         | 0        | 0        | 0        | 0        | 0        | 0         |
| ENSMUSG Olfr235         | 0.029282 | 0        | 0        | 0        | 0        | 0         |
| ENSMUSG Tmem26          | 0.594878 | 0.505724 | 0.56693  | 1.389847 | 2.368714 | 2.370595  |
| ENSMUSG Krtap22-2       | 0        | 0        | 0        | 0        | 0        | 0         |
| ENSMUSG Gm21060         | 0        | 0        | 0        | 0        | 0        | 0         |
| ENSMUSG Zfp97           | 2.197168 | 2.339371 | 1.986509 | 1.877776 | 2.281774 | 1.924242  |
| ENSMUSG Gm16513         | 0        | 0        | 0        | 0        | 0        | 0         |
| ENSMUSG Trappc12        | 9.328593 | 8.770583 | 7.902897 | 7.883612 | 8.002563 | 9.073267  |
| ENSMUSG Fubp1           | 16.19112 | 21.54232 | 23.05253 | 18.47024 | 17.36755 | 20.861346 |
| ENSMUSG Olfr220         | 0        | 0        | 0        | 0        | 0        | 0         |
| ENSMUSG Olfr417         | 0        | 0        | 0        | 0        | 0        | 0         |

|                    |          |          |          |          |          |           |
|--------------------|----------|----------|----------|----------|----------|-----------|
| ENSMUSG Ifi208     | 1.364329 | 1.200258 | 1.703722 | 1.429668 | 0.922472 | 0.985366  |
| ENSMUSG Ssxb10     | 0        | 0        | 0        | 0        | 0        | 0         |
| ENSMUSG Ssxb9      | 0        | 0        | 0        | 0        | 0        | 0         |
| ENSMUSG Gm40460    | 0        | 0        | 0        | 0        | 0        | 0         |
| ENSMUSG Sema3e     | 24.53213 | 19.76308 | 20.77031 | 14.02116 | 14.18563 | 13.384429 |
| ENSMUSG Zfp773     | 0.748852 | 1.110377 | 1.074051 | 0.958686 | 0.74897  | 1.150625  |
| ENSMUSG Gpr101     | 0        | 0        | 0        | 0        | 0        | 0         |
| ENSMUSG Sae1       | 25.20563 | 23.98163 | 25.51396 | 23.77825 | 25.96467 | 24.942903 |
| ENSMUSG Csgalnact1 | 11.12848 | 9.84082  | 9.621229 | 6.253923 | 7.143075 | 7.543152  |
| ENSMUSG BC016579   | 0.034587 | 0        | 0        | 0.024128 | 0        | 0         |
| ENSMUSG Popdc3     | 9.460583 | 8.106873 | 9.242336 | 4.964009 | 5.18751  | 5.025654  |
| ENSMUSG Prep       | 10.38523 | 9.713223 | 9.09633  | 8.760105 | 9.113772 | 9.181649  |
| ENSMUSG Fam241b    | 4.452897 | 5.001984 | 4.271841 | 3.253744 | 3.004264 | 4.100909  |
| ENSMUSG Rev3l      | 5.426018 | 6.280077 | 5.051975 | 5.782256 | 5.74609  | 5.777616  |
| ENSMUSG Traf3ip2   | 6.463703 | 5.642595 | 5.987423 | 6.081339 | 5.647883 | 5.669591  |
| ENSMUSG Fyn        | 18.89845 | 16.16466 | 21.4411  | 16.73014 | 17.15178 | 17.313342 |
| ENSMUSG Tube1      | 0.29723  | 0.245824 | 0.453053 | 0.419786 | 0.443498 | 0.435168  |
| ENSMUSG Lama4      | 13.00878 | 12.66906 | 12.73381 | 10.38811 | 11.13625 | 10.467072 |
| ENSMUSG Cnfn       | 0        | 0        | 0        | 0        | 0        | 0         |
| ENSMUSG H2afy2     | 5.90905  | 6.046731 | 5.796745 | 3.3187   | 3.451704 | 3.665354  |
| ENSMUSG Il9r       | 0.158224 | 0.238504 | 0.275718 | 1.455388 | 1.013158 | 1.657818  |
| ENSMUSG Pfk1       | 19.21219 | 22.18944 | 21.35342 | 16.14422 | 17.37229 | 18.445217 |
| ENSMUSG Rel        | 3.088314 | 3.075107 | 3.450678 | 4.223982 | 4.338759 | 4.76548   |
| ENSMUSG Tysnd1     | 7.642018 | 6.698859 | 7.416838 | 6.156255 | 7.149849 | 7.694352  |
| ENSMUSG Papolg     | 6.311279 | 6.183544 | 5.819149 | 5.409984 | 5.584022 | 4.465057  |
| ENSMUSG Stk10      | 13.01976 | 10.64177 | 13.92609 | 14.22295 | 13.14597 | 14.648011 |
| ENSMUSG Gm10428    | 0        | 0        | 0        | 0        | 0        | 0         |
| ENSMUSG Smim23     | 0        | 0        | 0        | 0        | 0        | 0         |
| ENSMUSG Clasp2     | 14.95508 | 13.6998  | 12.35664 | 11.75414 | 13.19201 | 12.132781 |
| ENSMUSG Spg11      | 4.943542 | 5.395466 | 4.078984 | 4.497054 | 4.876855 | 4.916144  |
| ENSMUSG Ppa1       | 6.823721 | 9.099325 | 10.44884 | 15.58619 | 16.30746 | 17.603357 |
| ENSMUSG Eaf1       | 14.46712 | 14.5962  | 16.01926 | 13.43442 | 13.91894 | 14.041775 |
| ENSMUSG Mettl6     | 5.728893 | 7.643019 | 7.474852 | 6.499732 | 6.465544 | 6.033646  |
| ENSMUSG Sh3bp5     | 28.97118 | 26.69332 | 34.44743 | 29.94559 | 22.58777 | 25.347449 |
| ENSMUSG Capn7      | 14.07565 | 11.43202 | 13.08712 | 13.57673 | 13.37409 | 13.185824 |
| ENSMUSG Plcb4      | 27.18621 | 35.31655 | 28.90136 | 23.4226  | 27.31571 | 19.434173 |
| ENSMUSG Arhgef3    | 66.80997 | 61.29855 | 59.89853 | 41.89676 | 40.5677  | 38.355875 |
| ENSMUSG Asb14      | 0.380194 | 0.726194 | 0.262908 | 0.334939 | 0.288077 | 0.429344  |
| ENSMUSG Vmn2r40    | 0        | 0        | 0        | 0        | 0        | 0         |
| ENSMUSG A530084C   | 0        | 0        | 0        | 0        | 0        | 0         |
| ENSMUSG Rps13      | 182.8743 | 189.1649 | 217.8134 | 210.3122 | 196.5196 | 194.30471 |
| ENSMUSG Rcor1      | 12.48452 | 12.55963 | 11.95741 | 10.16027 | 9.559432 | 11.676053 |
| ENSMUSG H2afz      | 107.423  | 111.077  | 127.3657 | 158.2458 | 156.1368 | 165.81156 |
| ENSMUSG Pcdh18     | 7.865119 | 6.222897 | 9.014705 | 4.464408 | 4.716698 | 4.057997  |
| ENSMUSG Wdr19      | 3.432048 | 4.14044  | 3.192295 | 4.156042 | 4.365815 | 3.938688  |
| ENSMUSG Gm13694    | 0        | 0        | 0        | 0        | 0        | 0         |
| ENSMUSG Gm13871    | 0        | 0        | 0        | 0        | 0        | 0         |
| ENSMUSG 9530077C   | 0.950163 | 1.469749 | 0.701346 | 1.281486 | 1.456387 | 1.268634  |
| ENSMUSG Arsi       | 0.029263 | 0        | 0.120725 | 0.399915 | 0.179727 | 0.49622   |
| ENSMUSG Gm21976    | 0.128748 | 0.109001 | 0.123805 | 0.249532 | 0.027184 | 0.243838  |
| ENSMUSG Serpina1b  | 11.1563  | 6.208726 | 11.9354  | 5.7708   | 7.266349 | 4.909987  |
| ENSMUSG Serpina16  | 0        | 0        | 0        | 0        | 0        | 0         |
| ENSMUSG Srsf3      | 56.40168 | 56.08942 | 60.5236  | 44.75133 | 47.25474 | 45.226812 |
| ENSMUSG Gm49383    | 0        | 0        | 0        | 0.000405 | 0.008267 | 0         |
| ENSMUSG Arhgef10   | 15.91743 | 15.01214 | 15.48912 | 11.33641 | 10.40662 | 11.257217 |
| ENSMUSG Serpina1d  | 1.169363 | 0.730783 | 1.242458 | 0.589521 | 0.9203   | 0.712995  |
| ENSMUSG Otof       | 0.094139 | 0.037251 | 0.11557  | 0.032318 | 0.045252 | 0.120552  |
| ENSMUSG Tmem65     | 19.28594 | 17.89564 | 18.7647  | 13.11686 | 14.08628 | 12.626336 |
| ENSMUSG Borcs7     | 3.452745 | 2.869046 | 2.90874  | 3.125013 | 2.806391 | 2.339148  |
| ENSMUSG Etfdh      | 15.5703  | 16.81284 | 15.01699 | 15.54241 | 16.20173 | 17.453768 |
| ENSMUSG Serp1      | 47.78497 | 48.21954 | 48.10693 | 70.40081 | 76.4111  | 69.884895 |
| ENSMUSG Spag9      | 36.3629  | 36.39689 | 32.43018 | 27.90249 | 29.90474 | 27.615526 |
| ENSMUSG Tm4sf4     | 0        | 0        | 0        | 0        | 0        | 0         |
| ENSMUSG Tm4sf1     | 63.48095 | 63.66976 | 60.68323 | 57.43114 | 56.87899 | 57.632402 |

|                  |          |          |          |          |          |           |
|------------------|----------|----------|----------|----------|----------|-----------|
| ENSMUSG Wwtr1    | 45.63032 | 48.24066 | 42.19416 | 34.69904 | 34.17984 | 31.515419 |
| ENSMUSG Prpf8    | 43.30402 | 39.44186 | 36.68055 | 34.97243 | 37.24932 | 37.422109 |
| ENSMUSG Nme2     | 72.16863 | 66.61314 | 86.78165 | 111.4316 | 107.9563 | 116.85269 |
| ENSMUSG Ppid     | 17.00824 | 19.95232 | 18.82966 | 15.61293 | 15.73185 | 15.083961 |
| ENSMUSG Tsc22d2  | 7.588742 | 5.339157 | 5.871545 | 4.44004  | 4.972651 | 5.907872  |
| ENSMUSG Gm8094   | 0        | 0        | 0        | 0.023857 | 0        | 0         |
| ENSMUSG Gm17542  | 0        | 0        | 0        | 0        | 0        | 0         |
| ENSMUSG Yy2      | 1.023667 | 0.232774 | 0.055905 | 0.049745 | 0.039211 | 0.027526  |
| ENSMUSG Gm28635  | 0        | 0        | 0        | 0        | 0        | 0         |
| ENSMUSG Vmn1r29  | 0        | 0        | 0        | 0        | 0        | 0         |
| ENSMUSG Gpr62    | 0.02856  | 0.022279 | 0.025635 | 0.099715 | 0.015036 | 0.093991  |
| ENSMUSG Atp5o    | 0        | 0        | 0        | 0        | 0        | 0         |
| ENSMUSG Clec1b   | 3.637512 | 3.67193  | 5.60222  | 2.296694 | 2.416691 | 2.492629  |
| ENSMUSG Clec12b  | 1.415242 | 1.118818 | 1.759557 | 0.402949 | 0.426287 | 0.980995  |
| ENSMUSG Clec2d   | 82.35304 | 74.84245 | 100.2979 | 76.50714 | 55.21984 | 54.466438 |
| ENSMUSG Cd69     | 3.411909 | 1.623769 | 2.858796 | 3.277038 | 3.975977 | 3.768885  |
| ENSMUSG Clec2e   | 0.032787 | 0.144238 | 0.070021 | 0.072044 | 0.049097 | 0.048526  |
| ENSMUSG Klrb1f   | 1.03373  | 0.736711 | 1.849635 | 0.774735 | 0.564028 | 0.684445  |
| ENSMUSG Klhl36   | 6.162534 | 5.603598 | 6.226936 | 5.276336 | 5.736531 | 6.965297  |
| ENSMUSG 6430548M | 25.42347 | 22.31132 | 22.6438  | 13.15982 | 15.89173 | 13.278192 |
| ENSMUSG Crispld2 | 18.39308 | 17.09877 | 17.30095 | 8.378934 | 10.71249 | 8.279807  |
| ENSMUSG Usp10    | 12.51018 | 11.62109 | 10.7318  | 11.99815 | 11.52965 | 12.824039 |
| ENSMUSG Cotl1    | 46.31629 | 39.45551 | 51.81942 | 111.2989 | 111.5209 | 129.05576 |
| ENSMUSG Babam1   | 30.42559 | 28.04394 | 29.83079 | 28.87123 | 27.5788  | 30.516196 |
| ENSMUSG Gins2    | 0.753205 | 1.009339 | 0.835554 | 1.902356 | 1.694037 | 1.754721  |
| ENSMUSG Gse1     | 14.8085  | 13.89798 | 13.75432 | 12.08253 | 11.37305 | 13.116783 |
| ENSMUSG Zdhhc7   | 17.60968 | 15.73136 | 17.0091  | 14.22049 | 15.26278 | 15.518517 |
| ENSMUSG Golga4   | 23.42457 | 25.71098 | 22.30286 | 23.13543 | 22.93986 | 22.339374 |
| ENSMUSG Txndc8   | 0        | 0        | 0        | 0        | 0        | 0         |
| ENSMUSG Gm42878  | 0.738236 | 0        | 0.331463 | 0.54305  | 0        | 0.282334  |
| ENSMUSG Zfp683   | 0.119773 | 0.170044 | 0.063853 | 0.202054 | 0.087613 | 0.282728  |
| ENSMUSG Tmem241  | 3.490995 | 3.399931 | 3.631547 | 2.973765 | 3.255556 | 3.623667  |
| ENSMUSG Dsel     | 3.583731 | 3.440944 | 3.00738  | 2.932621 | 2.556217 | 2.607552  |
| ENSMUSG Hoxb5    | 12.11061 | 11.06792 | 11.1275  | 6.156682 | 6.946925 | 5.221462  |
| ENSMUSG Tmem117  | 1.320441 | 0.893483 | 1.179755 | 0.625869 | 0.445739 | 0.730983  |
| ENSMUSG Luzp2    | 0.022828 | 0.101446 | 0        | 0.031458 | 0.022284 | 0.009959  |
| ENSMUSG Abi3bp   | 22.87882 | 20.66509 | 16.26524 | 8.809191 | 10.68249 | 9.44328   |
| ENSMUSG Jrkl     | 4.583288 | 4.719671 | 4.270578 | 4.461574 | 3.649219 | 3.559715  |
| ENSMUSG Sh3glb2  | 19.71442 | 20.10503 | 21.17185 | 18.96189 | 17.49526 | 21.417861 |
| ENSMUSG Hspa5    | 139.1551 | 156.0915 | 182.5582 | 253.8964 | 267.5018 | 276.69237 |
| ENSMUSG Kynu     | 1.430414 | 1.301167 | 1.503103 | 3.641277 | 4.414617 | 3.528444  |
| ENSMUSG Gapvd1   | 17.02795 | 14.54804 | 17.26001 | 14.17385 | 11.829   | 14.472748 |
| ENSMUSG Psm5     | 10.98176 | 11.61699 | 10.99579 | 10.37303 | 9.75913  | 10.491985 |
| ENSMUSG Pcdhac2  | 12.33198 | 11.50757 | 9.926083 | 6.128905 | 7.86939  | 5.487429  |
| ENSMUSG lspd     | 2.52962  | 1.508137 | 1.503407 | 1.415923 | 1.916917 | 1.514166  |
| ENSMUSG Dchs2    | 0.769616 | 0.607964 | 0.41359  | 0.398092 | 0.460022 | 0.267611  |
| ENSMUSG Ppp2r3a  | 5.786137 | 7.194164 | 4.818674 | 4.036753 | 3.754532 | 3.712002  |
| ENSMUSG Arl11    | 5.381656 | 4.409989 | 4.83949  | 10.36739 | 10.47719 | 12.253438 |
| ENSMUSG Olfr1412 | 0        | 0        | 0        | 0        | 0        | 0         |
| ENSMUSG B630019K | 0.666591 | 0.62345  | 0.760965 | 0.921484 | 1.061754 | 0.691536  |
| ENSMUSG Sorcs1   | 0.058572 | 0.024358 | 0.013998 | 0.010526 | 0.018615 | 0.007631  |
| ENSMUSG Pid1     | 16.00528 | 15.57449 | 19.44548 | 11.73662 | 11.39187 | 9.503705  |
| ENSMUSG Plekha7  | 3.207963 | 3.368706 | 2.15788  | 2.64859  | 2.520122 | 3.05899   |
| ENSMUSG Mapk6    | 12.10698 | 12.4322  | 13.17844 | 14.9081  | 14.39051 | 15.779307 |
| ENSMUSG Jph1     | 0.686281 | 0.649164 | 0.488225 | 0.497334 | 0.388758 | 0.315717  |
| ENSMUSG Fam216b  | 4.319775 | 5.903949 | 3.088443 | 7.223203 | 6.54001  | 5.627957  |
| ENSMUSG Npl      | 0.862181 | 1.256842 | 1.600561 | 2.951705 | 3.412757 | 3.137377  |
| ENSMUSG Pcdhb10  | 1.306987 | 1.006447 | 1.170998 | 0.74349  | 0.669434 | 0.806776  |
| ENSMUSG Selenok  | 45.60393 | 46.94538 | 51.05858 | 50.047   | 49.30255 | 46.912015 |
| ENSMUSG Garem1   | 1.258262 | 1.393607 | 1.283791 | 1.355567 | 1.324884 | 1.414542  |
| ENSMUSG Sf3b1    | 49.06575 | 50.61326 | 51.13262 | 45.43487 | 40.99019 | 43.639084 |
| ENSMUSG Ccdc150  | 0.276787 | 0.21142  | 0.306144 | 0.294963 | 0.207779 | 0.188116  |
| ENSMUSG Hspd1    | 49.78282 | 63.6766  | 62.33679 | 50.02946 | 52.9702  | 56.18817  |
| ENSMUSG Ppp1r21  | 13.3608  | 13.20338 | 13.55278 | 11.75077 | 13.44997 | 14.032667 |

|                  |          |          |          |          |          |           |
|------------------|----------|----------|----------|----------|----------|-----------|
| ENSMUSG Slc39a10 | 9.35034  | 8.73797  | 9.06557  | 8.740929 | 8.904977 | 9.142502  |
| ENSMUSG Inka2    | 4.643749 | 5.001724 | 5.743002 | 4.546297 | 4.431928 | 4.643131  |
| ENSMUSG Sprr1b   | 0        | 0        | 0        | 0        | 0        | 0         |
| ENSMUSG Neurod1  | 0        | 0        | 0        | 0        | 0        | 0         |
| ENSMUSG Dnaic2   | 3.659285 | 4.195924 | 2.282754 | 4.406229 | 4.629363 | 5.208164  |
| ENSMUSG Gns      | 63.46325 | 58.69392 | 60.54538 | 72.59248 | 74.65137 | 78.167772 |
| ENSMUSG Tmx1     | 23.13651 | 23.62958 | 20.89303 | 21.55297 | 21.69559 | 20.527997 |
| ENSMUSG Bdkrb2   | 14.33316 | 13.48757 | 16.38912 | 6.644141 | 8.236889 | 9.783146  |
| ENSMUSG Trim9    | 0.052119 | 0        | 0        | 0.014315 | 0.038059 | 0         |
| ENSMUSG Actr10   | 13.02987 | 13.1929  | 12.96021 | 10.75879 | 10.95214 | 11.182631 |
| ENSMUSG Krt34    | 0        | 0        | 0        | 0        | 0        | 0         |
| ENSMUSG Chchd4   | 2.814241 | 3.61029  | 3.384489 | 2.926833 | 3.20821  | 3.261216  |
| ENSMUSG Tomm20l  | 0        | 0.049225 | 0        | 0.284568 | 0        | 0.157796  |
| ENSMUSG Timm9    | 5.547682 | 6.025904 | 6.55017  | 5.034681 | 5.624717 | 5.914739  |
| ENSMUSG Gpc2     | 0.192823 | 0.227527 | 0.2488   | 0.187053 | 0.099699 | 0.277994  |
| ENSMUSG Prkab1   | 26.16388 | 25.74472 | 28.2491  | 28.33627 | 25.20648 | 24.087065 |
| ENSMUSG Ulk1     | 14.16741 | 14.71537 | 12.90235 | 11.74627 | 11.93011 | 12.661502 |
| ENSMUSG Ankrd7   | 0        | 0        | 0        | 0.05045  | 0        | 0         |
| ENSMUSG Cit      | 0.584488 | 0.902753 | 0.495985 | 0.762925 | 0.830177 | 0.922921  |
| ENSMUSG Rab35    | 26.94137 | 26.68374 | 27.22298 | 23.90481 | 26.58512 | 26.719356 |
| ENSMUSG Exd2     | 8.687358 | 9.29555  | 8.298856 | 6.830864 | 7.14747  | 7.19057   |
| ENSMUSG Kank1    | 9.561448 | 10.59215 | 8.454903 | 7.751415 | 5.897403 | 8.325388  |
| ENSMUSG Mapk8ip3 | 14.79091 | 13.64818 | 13.82511 | 12.1472  | 11.54702 | 11.88774  |
| ENSMUSG Spsb3    | 6.156301 | 6.844265 | 8.287588 | 8.236685 | 6.180993 | 7.08148   |
| ENSMUSG Adh1     | 57.55895 | 56.81043 | 54.04876 | 32.44579 | 30.3223  | 30.35919  |
| ENSMUSG Adh6b    | 0.346531 | 0.246441 | 0.127775 | 0.195308 | 0.184716 | 0.047563  |
| ENSMUSG Jpt2     | 8.751085 | 9.278201 | 8.600178 | 11.34953 | 12.87859 | 12.60415  |
| ENSMUSG C3       | 134.7462 | 195.2596 | 117.3932 | 386.3861 | 464.1724 | 518.85883 |
| ENSMUSG Ift140   | 4.312562 | 4.553461 | 3.488892 | 5.407279 | 5.552716 | 5.361363  |
| ENSMUSG Tmem204  | 167.679  | 148.1976 | 164.4759 | 78.38072 | 84.83163 | 70.152611 |
| ENSMUSG Insm1    | 0.101598 | 0.024839 | 0.011226 | 0.043167 | 0.095514 | 0.04872   |
| ENSMUSG Arel1    | 12.81613 | 11.79764 | 13.21929 | 13.06787 | 12.11277 | 11.727759 |
| ENSMUSG Grap2    | 6.093987 | 4.810296 | 6.095915 | 5.773559 | 5.353202 | 6.111299  |
| ENSMUSG Frem3    | 0.017672 | 0        | 0        | 0        | 0        | 0         |
| ENSMUSG Gnl3     | 8.530231 | 9.412126 | 9.139469 | 11.45643 | 10.82684 | 11.564881 |
| ENSMUSG Gjb5     | 0.103029 | 0.298756 | 0.330608 | 0.581301 | 0.538707 | 0.923072  |
| ENSMUSG Osbpl6   | 22.16516 | 14.57974 | 16.32509 | 9.62924  | 15.10701 | 13.712546 |
| ENSMUSG Cyp14    | 0        | 0        | 0        | 0        | 0        | 0         |
| ENSMUSG Mib1     | 14.60778 | 15.54406 | 13.50739 | 13.6769  | 12.66791 | 12.637638 |
| ENSMUSG Rock1    | 22.82293 | 24.65139 | 20.21042 | 21.13794 | 21.29908 | 20.031221 |
| ENSMUSG Esco1    | 8.974156 | 9.632955 | 9.171294 | 8.942953 | 9.455202 | 9.009657  |
| ENSMUSG Cyp4f14  | 0        | 0        | 0        | 0.0456   | 0        | 0.030352  |
| ENSMUSG Adamts10 | 35.1773  | 31.17748 | 37.36246 | 26.4604  | 21.75953 | 22.55395  |
| ENSMUSG Zfp871   | 11.6315  | 12.07019 | 10.84222 | 9.87217  | 9.071089 | 9.167402  |
| ENSMUSG Aqp5     | 106.1847 | 87.44618 | 96.81249 | 50.15621 | 47.63852 | 48.67514  |
| ENSMUSG Kcnj4    | 0        | 0        | 0        | 0        | 0        | 0         |
| ENSMUSG Olfr1094 | 0        | 0        | 0        | 0        | 0        | 0         |
| ENSMUSG Zdbf2    | 0.089988 | 0.142384 | 0.03379  | 0.070728 | 0.068504 | 0.077735  |
| ENSMUSG lghmbp2  | 1.901614 | 1.974669 | 2.025335 | 2.383514 | 2.498687 | 1.845631  |
| ENSMUSG Msh4     | 0        | 0        | 0        | 0        | 0.014205 | 0         |
| ENSMUSG Pola2    | 7.195014 | 6.011932 | 7.214545 | 7.365489 | 8.416083 | 8.164587  |
| ENSMUSG Coro1b   | 78.71159 | 73.43954 | 82.5299  | 84.85647 | 89.02652 | 89.23243  |
| ENSMUSG Dmrt1    | 0        | 0        | 0        | 0        | 0        | 0.023614  |
| ENSMUSG Hadhb    | 28.83214 | 32.46844 | 30.20905 | 28.19405 | 27.70327 | 26.128383 |
| ENSMUSG Rap2a    | 26.90936 | 28.15925 | 29.79803 | 23.28773 | 24.39193 | 23.025127 |
| ENSMUSG Krt9     | 0        | 0        | 0        | 0        | 0.021708 | 0.030127  |
| ENSMUSG Olfr112  | 0        | 0        | 0        | 0        | 0        | 0         |
| ENSMUSG Opn5     | 0        | 0        | 0        | 0        | 0        | 0         |
| ENSMUSG Ubqln3   | 0        | 0        | 0        | 0        | 0        | 0         |
| ENSMUSG Ggt7     | 0.303195 | 0.964846 | 0.494335 | 0.306026 | 0.228188 | 0.304534  |
| ENSMUSG Prss36   | 2.18776  | 2.570772 | 0.527907 | 1.031362 | 0.668147 | 0.941811  |
| ENSMUSG Abcc6    | 0.061316 | 0.111022 | 0.081581 | 0.53125  | 0.535755 | 0.532192  |
| ENSMUSG Nomo1    | 17.51661 | 18.29964 | 19.85243 | 16.9871  | 18.10786 | 19.564455 |
| ENSMUSG Itgal    | 17.72481 | 15.44196 | 32.75341 | 23.46222 | 19.04214 | 21.428019 |

|                    |          |          |          |          |          |           |
|--------------------|----------|----------|----------|----------|----------|-----------|
| ENSMUSG Ush1c      | 0        | 0        | 0        | 0        | 0        | 0         |
| ENSMUSG Sergef     | 3.01797  | 3.33745  | 3.743099 | 3.831956 | 3.50924  | 3.736345  |
| ENSMUSG Rprd1a     | 9.839744 | 10.61431 | 8.216249 | 7.761229 | 7.851501 | 7.490326  |
| ENSMUSG Spns2      | 29.91553 | 26.80082 | 31.61737 | 19.93987 | 18.39474 | 19.816427 |
| ENSMUSG Slc26a10   | 0.343564 | 0.264025 | 0.369059 | 0.378512 | 0.428719 | 0.556424  |
| ENSMUSG Btc        | 1.019659 | 1.243971 | 0.873405 | 0.38718  | 0.341564 | 0.59329   |
| ENSMUSG Ckap4      | 12.12782 | 11.02899 | 12.71506 | 24.08781 | 25.16987 | 26.119686 |
| ENSMUSG Vat1l      | 0.041186 | 0.059602 | 0        | 0.084207 | 0.021083 | 0         |
| ENSMUSG Il1f10     | 0        | 0        | 0        | 0        | 0        | 0         |
| ENSMUSG Spesp1     | 0        | 0        | 0        | 0        | 0        | 0         |
| ENSMUSG Il6ra      | 14.22184 | 14.1133  | 13.55145 | 10.88545 | 13.08587 | 10.81716  |
| ENSMUSG Lamc2      | 31.18797 | 28.06769 | 34.58543 | 19.04841 | 21.61399 | 24.498317 |
| ENSMUSG Lamc1      | 35.33833 | 34.27784 | 36.87346 | 26.99145 | 28.57006 | 28.83885  |
| ENSMUSG Glul       | 208.4566 | 217.8929 | 174.2786 | 119.5308 | 149.1428 | 122.40762 |
| ENSMUSG Mr1        | 12.79483 | 11.78817 | 9.660469 | 12.11394 | 10.39655 | 11.185988 |
| ENSMUSG Stx6       | 11.88321 | 11.26236 | 11.36119 | 13.40922 | 14.07814 | 14.605706 |
| ENSMUSG Rgs16      | 0.692838 | 0.629376 | 0.699507 | 1.000202 | 1.129652 | 1.188273  |
| ENSMUSG Coq8b      | 9.64566  | 10.20647 | 8.896702 | 11.60722 | 11.18384 | 12.513007 |
| ENSMUSG Olfr59     | 0        | 0        | 0        | 0        | 0        | 0         |
| ENSMUSG Bcl2l1     | 56.92961 | 62.4557  | 56.40602 | 31.06362 | 33.46145 | 31.157499 |
| ENSMUSG Chdh       | 0.567702 | 0.95875  | 0.638546 | 0.707343 | 0.702762 | 0.736638  |
| ENSMUSG Actr8      | 17.7401  | 16.86757 | 16.92399 | 15.08759 | 14.69248 | 13.916513 |
| ENSMUSG Cav1       | 640.6673 | 628.2962 | 597.9853 | 330.7679 | 335.9028 | 344.67248 |
| ENSMUSG Gabrb2     | 0        | 0        | 0        | 0        | 0        | 0         |
| Mus_musc Mus_musc  | 0.298228 | 0.292214 | 0.124763 | 0.055868 | 0.11492  | 0.303886  |
| Mus_musc Mus_musc  | 0        | 0.687642 | 0        | 0.418082 | 0.479901 | 0.530777  |
| ENSMUSG Gm26992    | 1.141045 | 1.14307  | 0.900632 | 1.569942 | 0.889182 | 2.131917  |
| Mus_musc Mus_musc  | 1.415987 | 2.254341 | 2.363277 | 2.564925 | 1.62349  | 1.816338  |
| Mus_musc Mus_musc  | 0.60889  | 0.418223 | 0.554011 | 1.310239 | 0.565568 | 0.32991   |
| ENSMUSG Gm15140    | 0        | 0        | 0        | 0        | 0        | 0         |
| Mus_musc Mus_musc  | 0.128826 | 0.126004 | 0.189363 | 0.566197 | 0        | 0         |
| Mus_musc Mus_musc  | 0        | 0        | 0        | 0.080095 | 0.220417 | 0.123781  |
| Mus_musc Mus_musc  | 3.033456 | 1.978906 | 1.918206 | 1.957888 | 1.307166 | 2.59313   |
| ENSMUSG Btd35f20   | 0        | 0        | 0        | 0        | 0        | 0         |
| Mus_musc Mus_musc  | 0        | 0        | 0        | 0.204664 | 0        | 0         |
| Mus_musc Mus_musc  | 0.138106 | 0        | 0        | 0        | 0.354715 | 0.187049  |
| Mus_musc Mus_musc  | 0.453445 | 0.099692 | 0.42396  | 0        | 0.4936   | 0.676266  |
| ENSMUSG St6galnac1 | 0        | 0        | 0        | 0        | 0.062068 | 0         |
| Mus_musc Mus_musc  | 0        | 0        | 0        | 0.135847 | 0        | 0.319285  |
| ENSMUSG Apobec3    | 8.101197 | 7.915647 | 9.557844 | 8.87643  | 8.560794 | 10.22728  |
| ENSMUSG Odam       | 0        | 0        | 0        | 0        | 0        | 0         |
| ENSMUSG Selenon    | 21.32703 | 19.97974 | 22.3095  | 17.29923 | 19.31995 | 18.593857 |
| ENSMUSG Tgfbr3l    | 0.276463 | 0.133159 | 1.127008 | 1.252286 | 0.948918 | 0.708434  |
| ENSMUSG Olfr1117-ꜛ | 0        | 0        | 0        | 0        | 0        | 0         |
| ENSMUSG Gm20431    | 0        | 0        | 0.20686  | 0        | 0        | 0         |
| ENSMUSG Bmp8b      | 0.036583 | 0        | 0        | 0        | 0.035116 | 0         |
| ENSMUSG Slc9a6     | 12.82981 | 14.09878 | 12.08125 | 12.51553 | 13.13637 | 12.607518 |
| ENSMUSG Nkap       | 6.864074 | 5.32083  | 5.455438 | 5.821848 | 6.149618 | 5.191951  |
| Mus_musc Mus_musc  | 0.189923 | 0.201276 | 0.208104 | 0.58398  | 0.267698 | 0.214214  |
| Mus_musc Mus_musc  | 0        | 0.267898 | 0        | 0.061748 | 0.302407 | 0         |
| ENSMUSG Gabra1     | 0        | 0        | 0        | 0        | 0        | 0         |
| Mus_musc Mus_musc  | 1.623639 | 1.266917 | 2.148862 | 0.702669 | 1.021173 | 0.945692  |
| Mus_musc Mus_musc  | 0.953742 | 1.047679 | 0.936301 | 0.600836 | 0.853878 | 0.517034  |
| Mus_musc Mus_musc  | 0.678604 | 0.261289 | 0.59144  | 0.550678 | 0.850209 | 0.584854  |
| ENSMUSG Crhr2      | 0        | 0.139193 | 0.036922 | 0.053787 | 0.147899 | 0.081261  |
| Mus_musc Mus_musc  | 20.45276 | 13.62761 | 20.84178 | 21.88689 | 19.08087 | 23.405473 |
| Mus_musc Mus_musc  | 1.069618 | 0.957338 | 0.539931 | 0.680492 | 0.756128 | 0.507239  |
| ENSMUSG Cox6c      | 102.0625 | 101.0381 | 111.8115 | 117.9116 | 109.7745 | 112.81235 |
| ENSMUSG Gm5414     | 0        | 0        | 0        | 0        | 0        | 0         |
| ENSMUSG Zfp14      | 1.124886 | 0.907941 | 1.079749 | 0.964006 | 0.856054 | 0.716318  |
| Mus_musc Mus_musc  | 0        | 0.102371 | 0        | 0.126851 | 0.54887  | 0         |
| Mus_musc Mus_musc  | 0.496114 | 0.735923 | 0.725726 | 0.680413 | 0.878301 | 0.626996  |
| ENSMUSG Olfr681    | 0        | 0        | 0        | 0        | 0        | 0         |
| Mus_musc Mus_musc  | 0.840539 | 0.246    | 0.691387 | 1.102312 | 1.180581 | 0.832991  |



|                   |          |          |          |          |          |           |
|-------------------|----------|----------|----------|----------|----------|-----------|
| Mus_musc Mus_musc | 0.624755 | 0.673594 | 0.951631 | 0.753368 | 0.613563 | 0.634622  |
| ENSMUSG Gm20834   | 0        | 0        | 0        | 0        | 0        | 0         |
| Mus_musc Mus_musc | 2.280629 | 1.61299  | 2.372095 | 1.54513  | 2.321527 | 1.537561  |
| ENSMUSG Gm5478    | 0        | 0        | 0        | 0        | 0        | 0         |
| ENSMUSG Proser2   | 1.928035 | 2.965009 | 2.225135 | 2.322802 | 2.573498 | 2.977384  |
| ENSMUSG Khdc3     | 0.131991 | 0.277041 | 0.603045 | 0.314578 | 0.27343  | 0.375613  |
| ENSMUSG Bcl10     | 22.35046 | 19.77439 | 22.54097 | 22.03014 | 23.84106 | 21.262701 |
| ENSMUSG Krtap16-3 | 0        | 0        | 0        | 0        | 0        | 0         |
| ENSMUSG Fam240b   | 0        | 0        | 0        | 0        | 0        | 0         |
| ENSMUSG Med25     | 15.43694 | 13.74805 | 14.55963 | 14.45559 | 15.34807 | 13.534543 |
| ENSMUSG Gm11758   | 0        | 0        | 0        | 0        | 0        | 0         |
| ENSMUSG Gm21852   | 0        | 0        | 0        | 0        | 0        | 0         |
| ENSMUSG Pnkp      | 14.10146 | 13.38931 | 15.69605 | 12.4956  | 12.04957 | 12.737256 |
| ENSMUSG Fam13a    | 10.00624 | 11.96676 | 6.74314  | 6.547877 | 7.562508 | 5.885758  |
| ENSMUSG Spag6     | 0.045593 | 0.050599 | 0.087423 | 0.334227 | 0.175147 | 0.232293  |
| ENSMUSG Cd81      | 136.4835 | 128.3594 | 139.9182 | 122.8069 | 120.647  | 125.64207 |
| ENSMUSG Tecta     | 0.007687 | 0        | 0        | 0        | 0.007302 | 0         |
| ENSMUSG Lzts3     | 5.79441  | 6.098083 | 6.428687 | 4.87359  | 5.650384 | 4.80684   |
| ENSMUSG Rcn3      | 26.50199 | 28.4039  | 31.51055 | 29.7701  | 29.00857 | 33.748344 |
| ENSMUSG Dyx1c1    | 0.895601 | 0.949178 | 1.052622 | 1.831972 | 1.822968 | 1.515456  |
| ENSMUSG Olfr1248  | 0        | 0        | 0        | 0        | 0        | 0         |
| ENSMUSG Hmgxb3    | 8.124212 | 7.904902 | 7.535015 | 5.921868 | 6.719327 | 6.91602   |
| ENSMUSG Timp2     | 158.3965 | 142.7591 | 143.4734 | 113.8949 | 118.1265 | 120.1188  |
| ENSMUSG Scgb1b18  | 0        | 0        | 0        | 0        | 0        | 0         |
| Mus_musc Mus_musc | 0.364698 | 0.184408 | 0.388388 | 0.63296  | 0.20926  | 0         |
| Mus_musc Mus_musc | 0.243862 | 0.392899 | 0.22759  | 0.166585 | 0.055618 | 0.323926  |
| Mus_musc Mus_musc | 0.05843  | 0.085267 | 0        | 0.509851 | 0.356809 | 0.254762  |
| ENSMUSG Stx5a     | 36.53321 | 30.08871 | 34.75766 | 34.29029 | 32.56299 | 32.050346 |
| ENSMUSG Prkd2     | 31.79273 | 30.03092 | 33.00471 | 24.38488 | 22.34959 | 23.30708  |
| ENSMUSG Hectd2    | 0.603527 | 0.635787 | 0.721258 | 0.506306 | 0.705691 | 0.814457  |
| ENSMUSG Otop2     | 0        | 0        | 0        | 0        | 0        | 0         |
| ENSMUSG Chrnbl    | 10.76007 | 10.17583 | 10.80317 | 8.602338 | 8.604482 | 7.971718  |
| ENSMUSG Zfp296    | 0.993072 | 1.104962 | 1.533437 | 2.344745 | 3.171632 | 2.966665  |
| ENSMUSG Gm20671   | 0        | 0        | 0        | 0        | 0        | 0         |
| ENSMUSG Gm20695   | 0.241572 | 0.286146 | 0.240271 | 0.093444 | 0.110111 | 0.144354  |
| ENSMUSG Tardbp    | 27.92012 | 28.37592 | 28.78932 | 29.788   | 26.40298 | 28.884963 |
| ENSMUSG Rpl21     | 2.157549 | 2.32802  | 2.406624 | 1.582907 | 2.66784  | 1.50266   |
| ENSMUSG Rbbp6     | 14.31494 | 15.29487 | 14.43878 | 13.74877 | 13.22927 | 12.454189 |
| ENSMUSG Zfp157    | 1.695073 | 1.619917 | 1.317651 | 1.847494 | 1.417233 | 1.61508   |
| ENSMUSG Trpv5     | 0        | 0        | 0        | 0        | 0        | 0         |
| ENSMUSG Gtdc1     | 4.410803 | 5.706692 | 4.380963 | 4.025331 | 3.792888 | 3.326872  |
| ENSMUSG Ndor1     | 0        | 0.082887 | 0.145192 | 0        | 0.077075 | 0.288869  |
| ENSMUSG Ehmt1     | 11.35782 | 11.26782 | 10.56675 | 10.04072 | 10.40845 | 10.343619 |
| ENSMUSG Rap2b     | 3.425394 | 2.706988 | 3.555717 | 3.776097 | 4.326777 | 4.701671  |
| ENSMUSG C1qc      | 9.114601 | 10.35322 | 17.05405 | 66.4302  | 63.36943 | 68.167534 |
| ENSMUSG Zfp579    | 11.83768 | 10.48513 | 12.22622 | 8.423335 | 7.808018 | 8.081187  |
| ENSMUSG Pusl1     | 5.154839 | 4.260335 | 5.013112 | 3.897179 | 3.815185 | 4.441007  |
| ENSMUSG Cldnd1    | 24.55512 | 27.03909 | 27.50057 | 22.30442 | 22.05158 | 22.410063 |
| ENSMUSG St3gal6   | 28.20291 | 24.3287  | 26.27581 | 22.05801 | 21.59622 | 18.19193  |
| ENSMUSG Cpox      | 8.844626 | 10.44628 | 9.462688 | 8.750759 | 9.56414  | 10.184007 |
| ENSMUSG Tbc1d23   | 15.44135 | 15.53581 | 14.49986 | 15.76711 | 15.55378 | 15.086078 |
| ENSMUSG Cmss1     | 6.662785 | 5.41787  | 5.453996 | 5.29274  | 4.415534 | 5.432423  |
| ENSMUSG Olfr1375  | 0        | 0        | 0        | 0        | 0        | 0         |
| ENSMUSG Zfp105    | 2.934694 | 2.701027 | 3.263549 | 2.577735 | 2.079304 | 2.615152  |
| ENSMUSG Zfp329    | 2.794115 | 3.098916 | 2.736723 | 3.184012 | 3.400418 | 2.444161  |
| ENSMUSG Camk2b    | 0.308151 | 0.12604  | 0.237093 | 0.23751  | 0.081721 | 0.09135   |
| ENSMUSG Rtn4      | 44.00701 | 63.6909  | 57.01438 | 57.82176 | 50.84486 | 58.955406 |
| ENSMUSG Drg1      | 33.49447 | 33.38156 | 32.96856 | 27.19826 | 29.43025 | 27.814981 |
| ENSMUSG Ogdh      | 64.20406 | 62.82211 | 58.38641 | 55.67236 | 62.16362 | 63.603653 |
| ENSMUSG Trim11    | 13.5731  | 12.61298 | 13.19082 | 12.3269  | 12.83142 | 13.450343 |
| ENSMUSG Eif4enif1 | 16.8322  | 18.70545 | 17.66036 | 16.54324 | 13.3804  | 15.991981 |
| ENSMUSG Patz1     | 16.62848 | 15.11817 | 14.06712 | 10.97275 | 11.73065 | 10.942532 |
| ENSMUSG Limk2     | 19.64882 | 20.91309 | 19.28864 | 19.56456 | 18.89053 | 21.52624  |
| ENSMUSG Vmn2r112  | 0        | 0        | 0        | 0        | 0        | 0         |

|                    |          |          |          |          |          |           |
|--------------------|----------|----------|----------|----------|----------|-----------|
| ENSMUSG Gm5798     | 0        | 0        | 0        | 0        | 0        | 0         |
| ENSMUSG 1700122O   | 0        | 0        | 0        | 0        | 0        | 0         |
| ENSMUSG Gm3526     | 0        | 0        | 0        | 0        | 0        | 0         |
| Mus_musc Mus_musc  | 0.033182 | 0        | 0        | 0        | 0        | 0         |
| Mus_musc Mus_musc  | 0        | 0.462928 | 0        | 0        | 0        | 0         |
| Mus_musc Mus_musc  | 0.109874 | 0.278872 | 0        | 0        | 0        | 0.110227  |
| ENSMUSG D630039A   | 2.647257 | 3.478938 | 2.62836  | 5.166005 | 4.817718 | 4.296746  |
| ENSMUSG Eif2ak2    | 8.772672 | 7.949665 | 7.97784  | 7.818078 | 7.438108 | 7.957013  |
| ENSMUSG Ndufs2     | 65.48652 | 73.18489 | 64.87376 | 71.81833 | 74.88523 | 73.295923 |
| ENSMUSG Ttc27      | 4.394467 | 3.494711 | 3.447893 | 3.83378  | 4.13922  | 4.263996  |
| ENSMUSG Exo5       | 4.25007  | 3.244812 | 4.053815 | 4.862798 | 3.924021 | 4.4184    |
| ENSMUSG Poll       | 3.167326 | 3.166328 | 2.741578 | 3.223567 | 3.008222 | 2.822242  |
| ENSMUSG Fgf8       | 0        | 0        | 0        | 0        | 0        | 0         |
| ENSMUSG Sfxn3      | 24.87334 | 22.38547 | 23.73624 | 18.94785 | 17.89969 | 20.353004 |
| ENSMUSG Kazald1    | 4.828379 | 4.906046 | 4.996526 | 2.807552 | 2.073346 | 2.085631  |
| ENSMUSG Mrpl37     | 17.48391 | 17.18086 | 19.172   | 18.48695 | 18.749   | 17.212807 |
| ENSMUSG Lbx1       | 0        | 0        | 0        | 0        | 0        | 0         |
| ENSMUSG Btrc       | 9.333058 | 10.36183 | 8.641562 | 8.084197 | 8.083642 | 7.491421  |
| ENSMUSG Col9a2     | 0        | 0.051137 | 0        | 0        | 0        | 0.070928  |
| ENSMUSG Tlx1       | 0        | 0        | 0        | 0        | 0        | 0         |
| ENSMUSG Usp6nl     | 9.873183 | 9.60503  | 7.53162  | 7.687961 | 7.742741 | 7.51256   |
| ENSMUSG Pigk       | 9.078181 | 9.236027 | 9.95937  | 10.60466 | 10.63618 | 11.142031 |
| ENSMUSG Pkmyt1     | 1.824251 | 1.12405  | 1.970124 | 2.037043 | 2.000567 | 2.563794  |
| ENSMUSG Arpin      | 13.87159 | 13.04354 | 13.25741 | 11.6626  | 9.242665 | 10.815583 |
| ENSMUSG Adrm1      | 40.69119 | 43.81232 | 50.32819 | 39.26286 | 36.05437 | 35.582291 |
| ENSMUSG Hcfc1r1    | 52.12132 | 48.06756 | 44.66595 | 43.97585 | 42.29305 | 49.624847 |
| ENSMUSG Tnfrsf12a  | 20.25727 | 17.68472 | 24.08552 | 13.31771 | 13.23259 | 15.852563 |
| ENSMUSG Cldn6      | 0.343863 | 0.485803 | 0.268819 | 0.269929 | 0.315853 | 0.266274  |
| ENSMUSG Foxred1    | 5.73935  | 6.107887 | 6.700921 | 6.273103 | 5.614664 | 7.476163  |
| ENSMUSG Mmp25      | 0.501124 | 0.320167 | 0.59902  | 2.230193 | 2.899442 | 3.528971  |
| ENSMUSG Chrac1     | 28.70782 | 27.41858 | 32.20101 | 31.05809 | 28.30384 | 27.263692 |
| ENSMUSG Rnase13    | 0        | 0        | 0        | 0        | 0        | 0         |
| ENSMUSG Cep152     | 1.462411 | 1.462032 | 1.6536   | 1.968905 | 1.370674 | 1.597643  |
| ENSMUSG Gm7247     | 0        | 0        | 0        | 0        | 0        | 0         |
| ENSMUSG Sccpdh     | 10.6128  | 11.153   | 9.947119 | 9.498491 | 9.048031 | 9.953703  |
| ENSMUSG Rccd1      | 1.67279  | 1.509773 | 1.975674 | 1.812031 | 1.380995 | 1.492963  |
| ENSMUSG Tcf5       | 0        | 0        | 0.022019 | 0.01025  | 0        | 0         |
| ENSMUSG Prkag1     | 33.31554 | 35.09582 | 37.16507 | 28.29164 | 28.84133 | 30.240553 |
| ENSMUSG 9130023H   | 1.796417 | 1.678747 | 1.394979 | 1.671797 | 1.769046 | 1.431172  |
| ENSMUSG Lpar5      | 1.866025 | 1.21925  | 1.679319 | 2.503616 | 3.30776  | 3.283891  |
| ENSMUSG Atp11c     | 9.701944 | 11.34584 | 9.52356  | 8.735745 | 8.826069 | 7.768884  |
| ENSMUSG Vmn1r224   | 0        | 0        | 0        | 0        | 0        | 0         |
| ENSMUSG Serpine3   | 0        | 0        | 0        | 0        | 0        | 0         |
| ENSMUSG Gm17545    | 0        | 0.045007 | 0        | 0.149847 | 0        | 0.035814  |
| ENSMUSG Olfr618    | 0        | 0        | 0        | 0        | 0        | 0         |
| ENSMUSG Olfr619    | 0        | 0        | 0        | 0        | 0        | 0         |
| ENSMUSG Olfr615    | 0        | 0        | 0        | 0        | 0        | 0         |
| ENSMUSG Ptch1      | 17.59742 | 17.59945 | 17.59148 | 14.48944 | 16.04247 | 14.133229 |
| ENSMUSG Fancc      | 4.34657  | 3.946734 | 3.582534 | 3.348634 | 2.673456 | 3.343409  |
| ENSMUSG Auh        | 15.13008 | 14.87453 | 14.49516 | 12.81177 | 15.84413 | 15.995277 |
| ENSMUSG Olfr625-ps | 0        | 0        | 0        | 0        | 0        | 0         |
| ENSMUSG Olfr606    | 0        | 0        | 0        | 0        | 0        | 0         |
| ENSMUSG Sptlc1     | 20.56837 | 19.83266 | 19.0564  | 18.45516 | 16.7618  | 16.577257 |
| ENSMUSG Gm4305     | 0        | 0        | 0        | 0        | 0        | 0         |
| ENSMUSG Rnf212b    | 0        | 0        | 0        | 0        | 0        | 0         |
| ENSMUSG Purg       | 4.625432 | 5.42306  | 5.35376  | 4.168005 | 4.320115 | 3.744448  |
| ENSMUSG Exoc6      | 11.10309 | 10.61983 | 10.38697 | 8.75284  | 8.885023 | 9.063023  |
| ENSMUSG Defb38     | 0        | 0        | 0        | 0        | 0        | 0         |
| ENSMUSG Krt16      | 0        | 0        | 0        | 0        | 0        | 0         |
| Mus_musc Mus_musc  | 0        | 0        | 0        | 0.352903 | 0.365503 | 0.340438  |
| ENSMUSG Slc16a8    | 0        | 0.085357 | 0        | 0.128633 | 0.107885 | 0.113     |
| ENSMUSG Olfr281    | 0        | 0        | 0        | 0        | 0        | 0         |
| ENSMUSG 5730522E   | 0        | 0        | 0        | 0        | 0        | 0.063086  |
| ENSMUSG Ola1       | 10.23666 | 10.77797 | 10.5777  | 14.10618 | 13.21301 | 13.6323   |

|                  |          |          |          |          |          |           |
|------------------|----------|----------|----------|----------|----------|-----------|
| ENSMUSG Sp3      | 26.91694 | 26.51124 | 25.26489 | 25.49985 | 24.47493 | 24.497861 |
| ENSMUSG Cyp3a57  | 0        | 0        | 0.074601 | 0        | 0.083382 | 0.034465  |
| ENSMUSG Meikin   | 0        | 0        | 0        | 0        | 0        | 0         |
| ENSMUSG Acsl6    | 0.058182 | 0.080091 | 0.025281 | 0.043927 | 0.028613 | 0.02529   |
| ENSMUSG Mapk15   | 3.745204 | 3.968179 | 3.081237 | 4.310119 | 4.611164 | 4.53633   |
| ENSMUSG Hcn2     | 0.664201 | 0.502821 | 0.377053 | 0.430656 | 0.594922 | 0.629289  |
| ENSMUSG Atf2     | 15.6454  | 18.28053 | 17.38337 | 15.01208 | 14.28975 | 14.290928 |
| ENSMUSG Olfr2    | 0        | 0        | 0        | 0        | 0        | 0         |
| ENSMUSG Slc22a4  | 0.226257 | 0.193129 | 0.313312 | 1.0692   | 0.841972 | 0.84801   |
| ENSMUSG Zfp354b  | 0.869159 | 1.053092 | 0.866288 | 0.70889  | 0.614222 | 0.904276  |
| ENSMUSG Igf2bp2  | 4.321138 | 4.640768 | 4.358078 | 3.847284 | 3.87391  | 3.723444  |
| ENSMUSG Olfr1474 | 0        | 0        | 0        | 0        | 0        | 0         |
| ENSMUSG Ndn      | 4.867642 | 4.845202 | 4.63893  | 3.425207 | 3.150876 | 3.692551  |
| ENSMUSG Reep4    | 14.57367 | 14.27171 | 14.87928 | 16.69913 | 18.01977 | 18.8716   |
| ENSMUSG Dcpp2    | 0        | 0        | 0        | 0        | 0        | 0         |
| ENSMUSG Tprkb    | 8.640244 | 8.330487 | 8.117804 | 8.19529  | 7.838759 | 8.348425  |
| ENSMUSG Sacs     | 1.452589 | 1.419727 | 1.200026 | 1.795424 | 1.736826 | 1.721659  |
| ENSMUSG Gstm3    | 0.093657 | 0.289845 | 0.12841  | 0        | 0        | 0.173228  |
| ENSMUSG Syng2    | 58.47192 | 60.28625 | 64.02938 | 85.90026 | 87.13289 | 89.625408 |
| ENSMUSG Rbm33    | 8.746844 | 8.164263 | 8.500069 | 7.318771 | 7.143674 | 7.076369  |
| ENSMUSG Gstm5    | 5.218419 | 5.868555 | 6.399045 | 5.369902 | 5.662361 | 5.987043  |
| ENSMUSG Brinp2   | 0.011498 | 0        | 0        | 0.052638 | 0.011416 | 0.044378  |
| ENSMUSG Clec18a  | 0        | 0.012586 | 0        | 0        | 0        | 0         |
| ENSMUSG AW55491E | 3.434113 | 3.347622 | 2.595763 | 2.188161 | 2.46018  | 2.466344  |
| ENSMUSG Nat8f2   | 0        | 0        | 0.040379 | 0        | 0        | 0         |
| ENSMUSG Vps26b   | 21.51637 | 20.94879 | 18.77368 | 17.5282  | 18.31509 | 18.332457 |
| ENSMUSG 2310022B | 23.59181 | 23.07092 | 22.89414 | 15.97324 | 16.94994 | 15.926474 |
| ENSMUSG Arv1     | 4.314197 | 3.707071 | 4.353898 | 4.250147 | 3.156977 | 3.182673  |
| ENSMUSG Capn9    | 0        | 0.071724 | 0.015734 | 4.136919 | 2.69494  | 4.991738  |
| ENSMUSG Agt      | 0.135231 | 0.278099 | 0.139187 | 0.637279 | 0.187482 | 0.416819  |
| ENSMUSG EglN1    | 22.3282  | 26.17395 | 22.8502  | 19.70501 | 19.18396 | 17.988066 |
| ENSMUSG Sprtn    | 10.40984 | 9.403774 | 10.06803 | 8.298241 | 8.092783 | 8.206813  |
| ENSMUSG Gnpat    | 25.13238 | 26.59898 | 25.05799 | 26.93465 | 25.22103 | 26.538755 |
| ENSMUSG 2810004N | 9.554624 | 8.737596 | 8.359142 | 8.231639 | 9.115387 | 8.808614  |
| ENSMUSG Thap4    | 3.267618 | 3.607895 | 3.325162 | 3.595865 | 4.036181 | 4.680377  |
| ENSMUSG Bok      | 6.743795 | 6.559582 | 5.142942 | 8.606294 | 9.053671 | 9.138164  |
| ENSMUSG Yif1b    | 25.53074 | 25.43552 | 27.23414 | 25.12897 | 29.45946 | 24.895059 |
| ENSMUSG Rasgrp4  | 2.422438 | 1.901462 | 2.837516 | 2.730726 | 1.829364 | 2.559853  |
| ENSMUSG Dpf1     | 0.317186 | 0.165436 | 0.607749 | 0.294863 | 0.417845 | 0.548758  |
| ENSMUSG Capn10   | 6.456555 | 6.334472 | 6.602672 | 5.633123 | 6.417873 | 6.118003  |
| ENSMUSG Mterf4   | 5.541596 | 5.479247 | 6.098288 | 5.983915 | 7.131799 | 6.163149  |
| ENSMUSG 2200002D | 4.510858 | 4.065732 | 4.854843 | 3.956997 | 3.757275 | 3.421834  |
| ENSMUSG Ppp1r7   | 4.918064 | 4.840489 | 4.236692 | 4.226325 | 3.813691 | 3.853098  |
| ENSMUSG Pask     | 0.395024 | 0.308165 | 0.234246 | 0.42271  | 0.437317 | 0.540543  |
| ENSMUSG Stk25    | 22.91446 | 21.615   | 25.73725 | 19.80908 | 17.03981 | 18.317314 |
| ENSMUSG 2-Sep    | 56.00277 | 62.4827  | 49.33696 | 47.21173 | 44.4425  | 48.294522 |
| ENSMUSG Scaper   | 4.527502 | 4.589938 | 3.31796  | 3.330674 | 3.043999 | 3.445094  |
| ENSMUSG Pqlc1    | 28.30781 | 27.59998 | 29.28342 | 28.57246 | 26.38216 | 29.07745  |
| ENSMUSG Neu4     | 0        | 0        | 0        | 0        | 0        | 0         |
| ENSMUSG Rxfp1    | 0.020753 | 0.162615 | 0.03638  | 0.131951 | 0.094005 | 0.016427  |
| ENSMUSG Setd6    | 3.328207 | 3.379327 | 3.871758 | 2.987073 | 2.875337 | 3.820813  |
| ENSMUSG Cdh11    | 8.923085 | 9.157177 | 11.12693 | 9.85863  | 8.833222 | 10.605161 |
| ENSMUSG Got2     | 26.54235 | 27.52783 | 24.75917 | 27.82436 | 29.86602 | 28.565393 |
| ENSMUSG Olfr530  | 0        | 0        | 0        | 0.095709 | 0        | 0         |
| ENSMUSG Bsg      | 305.3151 | 331.412  | 313.0187 | 315.3934 | 320.8334 | 346.75682 |
| ENSMUSG Dtnb     | 6.791644 | 6.26788  | 6.003353 | 6.148965 | 5.80306  | 5.828453  |
| ENSMUSG Cpn2     | 0.133358 | 0.181305 | 0.043626 | 0        | 0.110374 | 0.14824   |
| ENSMUSG Psmg4    | 13.62978 | 9.818493 | 17.47879 | 12.78926 | 12.37828 | 11.998881 |
| ENSMUSG Gps2     | 26.86521 | 25.54678 | 29.77218 | 23.11358 | 23.6988  | 24.265796 |
| ENSMUSG Gm11397  | 0        | 0        | 0        | 0        | 0        | 0         |
| ENSMUSG Hoxd11   | 0        | 0        | 0        | 0        | 0        | 0         |
| ENSMUSG Arrdc3   | 46.65977 | 43.21648 | 39.50047 | 21.03226 | 27.78113 | 20.624995 |
| ENSMUSG ltpa     | 3.635432 | 3.637074 | 3.441962 | 3.233759 | 3.224338 | 3.407578  |
| ENSMUSG Slc4a11  | 0.819409 | 0.81529  | 0.757281 | 1.212723 | 0.835734 | 1.162114  |

|                   |          |          |          |          |          |           |
|-------------------|----------|----------|----------|----------|----------|-----------|
| ENSMUSG Metap1    | 14.04901 | 13.20876 | 12.64943 | 11.88441 | 12.82997 | 13.325256 |
| ENSMUSG Hspa12b   | 44.10858 | 35.28027 | 48.76176 | 23.07554 | 24.20857 | 24.417552 |
| ENSMUSG Fance     | 7.89973  | 7.1401   | 7.873099 | 6.038637 | 6.311826 | 6.82169   |
| ENSMUSG Gpr55     | 0.436853 | 0.569547 | 0.612592 | 2.96398  | 2.703402 | 3.284811  |
| ENSMUSG Zbtb45    | 5.434875 | 6.208642 | 6.495337 | 5.66512  | 5.931666 | 7.056445  |
| ENSMUSG Zfp644    | 9.851394 | 9.572649 | 8.235793 | 6.992183 | 7.902874 | 7.292505  |
| ENSMUSG Olfr418   | 0        | 0        | 0        | 0        | 0        | 0         |
| ENSMUSG Hoxb13    | 0.020627 | 0        | 0        | 0        | 0        | 0         |
| ENSMUSG Taar3     | 0        | 0        | 0        | 0        | 0        | 0         |
| ENSMUSG Plvap     | 257.9921 | 177.8917 | 228.5697 | 210.3128 | 223.3343 | 202.00877 |
| ENSMUSG Taar5     | 0        | 0        | 0        | 0        | 0        | 0         |
| ENSMUSG Taar4     | 0        | 0        | 0        | 0.044504 | 0        | 0.052927  |
| ENSMUSG F830045P1 | 0        | 0        | 0        | 0        | 0        | 0         |
| ENSMUSG Ar        | 0.841557 | 0.878356 | 0.914992 | 0.697467 | 0.736179 | 0.790619  |
| ENSMUSG Sdr39u1   | 7.14305  | 7.363661 | 7.431051 | 6.961897 | 5.389314 | 5.094655  |
| ENSMUSG Adcy4     | 28.85196 | 26.25634 | 34.77122 | 18.46757 | 20.22315 | 19.041294 |
| ENSMUSG Ripk3     | 3.861049 | 3.171251 | 4.087806 | 5.623117 | 6.012882 | 6.530175  |
| ENSMUSG Tmem165   | 27.71437 | 28.8393  | 29.41224 | 28.89582 | 30.0672  | 33.279198 |
| ENSMUSG Mcpt1     | 0        | 0.222104 | 0.193781 | 3.904208 | 5.192957 | 1.884731  |
| ENSMUSG Nmu       | 0        | 0        | 0        | 0        | 0        | 0         |
| ENSMUSG Cma1      | 1.178267 | 1.00165  | 3.270342 | 1.466094 | 1.00039  | 0.963981  |
| ENSMUSG Clock     | 9.139002 | 10.14207 | 7.947464 | 9.528903 | 10.16434 | 10.141062 |
| ENSMUSG Zc2hc1a   | 13.8468  | 15.42767 | 13.12044 | 11.54489 | 10.95244 | 10.924953 |
| ENSMUSG Zscan26   | 23.03883 | 24.25936 | 23.87287 | 17.81353 | 18.46926 | 18.030899 |
| ENSMUSG Atp12a    | 0.014304 | 0        | 0        | 0        | 0        | 0         |
| ENSMUSG Ccl12     | 1.94056  | 0.908327 | 1.862073 | 6.119082 | 7.098829 | 7.081396  |
| ENSMUSG Nup37     | 2.808384 | 2.744025 | 2.528442 | 3.558118 | 3.507446 | 4.572556  |
| ENSMUSG Nfkbiz    | 12.70019 | 6.710972 | 8.420903 | 9.094741 | 8.613747 | 7.568621  |
| ENSMUSG Pdzn3     | 7.647024 | 7.848867 | 7.60647  | 6.436626 | 6.812406 | 6.305686  |
| ENSMUSG Uvrag     | 12.02145 | 11.36683 | 11.91533 | 11.21391 | 11.6051  | 11.714579 |
| ENSMUSG Kcnh4     | 0.204688 | 0.150543 | 0.164513 | 0.075548 | 0.058306 | 0.083789  |
| ENSMUSG B4galt2   | 3.194153 | 2.623771 | 3.727664 | 2.666706 | 3.390765 | 3.404829  |
| ENSMUSG Dph2      | 2.540375 | 2.3301   | 2.947622 | 3.204349 | 2.649716 | 2.512502  |
| ENSMUSG Ttc22     | 0.427893 | 0.702699 | 0.428294 | 0.578055 | 0.961604 | 0.612127  |
| ENSMUSG Slc6a9    | 11.26927 | 11.89977 | 12.92424 | 8.224145 | 8.986971 | 8.419969  |
| ENSMUSG Bend5     | 1.358234 | 0.817603 | 1.215304 | 1.616416 | 2.067725 | 1.74987   |
| ENSMUSG Slc5a9    | 0.022393 | 0.137036 | 0.009381 | 0.481094 | 0.331651 | 0.476403  |
| ENSMUSG Arpc5     | 99.77411 | 100.9309 | 105.7925 | 115.9185 | 108.2638 | 110.27346 |
| ENSMUSG Elavl4    | 0.012236 | 0.148337 | 0.042102 | 0.07383  | 0.061511 | 0.025837  |
| ENSMUSG Spert     | 0        | 0        | 0        | 0        | 0        | 0         |
| ENSMUSG Mdga2     | 0.005718 | 0        | 0        | 0.007964 | 0.002848 | 0         |
| ENSMUSG Ushbp1    | 37.09088 | 32.65313 | 42.00166 | 25.44608 | 22.48765 | 24.416965 |
| ENSMUSG Pygo1     | 1.868984 | 2.068029 | 1.601479 | 1.811694 | 1.54382  | 1.610804  |
| ENSMUSG Tjp3      | 9.088376 | 9.808586 | 8.229092 | 15.7026  | 17.28003 | 17.620312 |
| Mus_musc Mus_musc | 0.282544 | 0.077562 | 0.192484 | 0.051268 | 0.142139 | 0.134007  |
| Mus_musc Mus_musc | 0        | 0.02374  | 0.039936 | 0.773506 | 1.137045 | 1.021211  |
| Mus_musc Mus_musc | 2.528027 | 2.282551 | 2.188407 | 0.517983 | 0.375711 | 0.55801   |
| Mus_musc Mus_musc | 0        | 0        | 0.146411 | 0        | 0.147798 | 0         |
| ENSMUSG Gadd45g   | 11.41426 | 12.66676 | 14.42283 | 18.28104 | 23.36313 | 24.812777 |
| Mus_musc Mus_musc | 0        | 0        | 0        | 0        | 0        | 0.480667  |
| Mus_musc Mus_musc | 0.602121 | 0.384002 | 0.276568 | 0.449428 | 0.376956 | 0.405727  |
| Mus_musc Mus_musc | 0.243084 | 0.091524 | 0.304276 | 0        | 0.416892 | 0.629838  |
| Mus_musc Mus_musc | 0        | 0        | 0.295115 | 0        | 0.067738 | 0         |
| ENSMUSG Prodh2    | 0        | 0        | 0        | 0        | 0        | 0         |
| ENSMUSG Vmn1r2    | 0        | 0.128172 | 0        | 0        | 0        | 0         |
| ENSMUSG Wdr72     | 0.25318  | 0.349646 | 0.058198 | 0.634965 | 0.567763 | 0.643184  |
| ENSMUSG Tmem88    | 8.848204 | 7.076414 | 7.087375 | 6.339675 | 5.628608 | 8.310246  |
| ENSMUSG Wdr81     | 7.771012 | 7.45097  | 7.422904 | 8.577457 | 8.840803 | 9.333862  |
| ENSMUSG Pxt1      | 0        | 0        | 0        | 0        | 0        | 0.053439  |
| ENSMUSG Fibrin    | 40.26676 | 35.56519 | 31.91761 | 15.511   | 18.32377 | 12.765562 |
| ENSMUSG Slc25a38  | 10.27852 | 13.86286 | 15.25339 | 11.58984 | 11.42952 | 12.871164 |
| ENSMUSG Rpsa      | 252.5499 | 340.7661 | 364.8708 | 400.8598 | 421.7541 | 443.81411 |
| ENSMUSG Csrnp1    | 27.08301 | 21.05011 | 38.66214 | 10.82939 | 16.22732 | 11.186878 |
| ENSMUSG Ttc21a    | 4.738509 | 5.571719 | 3.333257 | 5.581895 | 5.586641 | 6.506284  |

|                    |          |          |          |          |          |           |
|--------------------|----------|----------|----------|----------|----------|-----------|
| ENSMUSG Mobp       | 0.021621 | 0        | 0        | 0.019876 | 0        | 0         |
| ENSMUSG Scn5a      | 0.444881 | 0.878892 | 0.313917 | 0.75073  | 0.582842 | 0.589797  |
| ENSMUSG Gorasp1    | 5.566829 | 6.536272 | 6.186975 | 6.571328 | 7.042498 | 7.054502  |
| ENSMUSG Wdr48      | 19.06798 | 20.07747 | 17.88114 | 16.20698 | 16.12676 | 15.713115 |
| ENSMUSG Dsg2       | 2.796019 | 3.442609 | 1.585194 | 2.909209 | 2.799937 | 2.760873  |
| ENSMUSG Tigd3      | 0.576547 | 0.503367 | 0.623721 | 0.590535 | 0.326138 | 0.410194  |
| ENSMUSG Gstp3      | 3.298953 | 3.355081 | 3.017484 | 4.682091 | 4.630826 | 7.278235  |
| ENSMUSG Tmx2       | 20.6264  | 20.51875 | 20.2935  | 18.80479 | 19.56529 | 21.510262 |
| ENSMUSG Gm21981    | 7.681047 | 5.433259 | 6.865817 | 7.562791 | 5.184545 | 5.021865  |
| ENSMUSG B3gnt7     | 5.285767 | 4.906943 | 5.39524  | 8.069252 | 9.209673 | 8.226212  |
| ENSMUSG St6galnac4 | 7.04488  | 5.667493 | 7.876404 | 9.967988 | 9.230994 | 11.41005  |
| ENSMUSG Alpi       | 0        | 0        | 0        | 0        | 0        | 0         |
| ENSMUSG Rnf138     | 9.282705 | 8.159506 | 6.765735 | 7.454349 | 5.802468 | 5.868741  |
| ENSMUSG Vps52      | 14.89493 | 14.18092 | 14.97252 | 13.49847 | 14.18782 | 15.337711 |
| ENSMUSG Rell2      | 0.089608 | 0.158493 | 0.151798 | 0.400528 | 0.052282 | 0.306502  |
| ENSMUSG Olfr790    | 0        | 0        | 0        | 0        | 0        | 0         |
| ENSMUSG Slc35g1    | 1.597157 | 1.579947 | 1.157341 | 1.559628 | 1.911405 | 1.553829  |
| Mus_musc Mus_musc  | 6.361282 | 7.554848 | 4.538396 | 2.91228  | 3.854211 | 4.275803  |
| ENSMUSG Pcdhb21    | 0.431733 | 0.481695 | 0.325525 | 0.322082 | 0.28997  | 0.264346  |
| Mus_musc Mus_musc  | 0.192749 | 0.47233  | 0.307294 | 0.129733 | 0.14554  | 0.268027  |
| Mus_musc Mus_musc  | 0.186537 | 0        | 0        | 0.31677  | 0        | 0.222546  |
| Mus_musc Mus_musc  | 12.29327 | 11.98941 | 14.20852 | 12.88227 | 10.81059 | 11.105729 |
| Mus_musc Mus_musc  | 0        | 0        | 0        | 0        | 0        | 0.170798  |
| Mus_musc Mus_musc  | 1.99746  | 1.866437 | 2.200567 | 1.341935 | 1.97454  | 1.861492  |
| Mus_musc Mus_musc  | 0        | 0        | 0        | 0.228468 | 0        | 0.091489  |
| Mus_musc Mus_musc  | 0        | 0.0984   | 0.254406 | 0        | 0        | 0.181054  |
| Mus_musc Mus_musc  | 0        | 0        | 0.068304 | 0.322252 | 0        | 0         |
| Mus_musc Mus_musc  | 0        | 0        | 0        | 0        | 0        | 0.368372  |
| ENSMUSG Kcnh6      | 0.236745 | 0.239115 | 0.139743 | 0.176289 | 0.165296 | 0.101381  |
| Mus_musc Mus_musc  | 0.125757 | 0.175397 | 0.155356 | 0.198356 | 0        | 0.114302  |
| Mus_musc Mus_musc  | 0.165468 | 0.065251 | 0        | 0.230696 | 0.032538 | 0.231548  |
| Mus_musc Mus_musc  | 0        | 0.181407 | 0.152771 | 0.223787 | 0.206127 | 0         |
| Mus_musc Mus_musc  | 0.743433 | 0.451294 | 0.84432  | 0.201616 | 0.259457 | 0.392084  |
| Mus_musc Mus_musc  | 0        | 0        | 0.111873 | 0        | 0.222924 | 0.203014  |
| Mus_musc Mus_musc  | 0        | 0        | 0        | 0.389524 | 0        | 0         |
| ENSMUSG Trmt1      | 10.58519 | 10.55715 | 9.838598 | 11.81576 | 10.25798 | 10.856186 |
| ENSMUSG Nppa       | 0        | 7.971456 | 0.244909 | 0.734693 | 0.124749 | 0.215913  |
| ENSMUSG Ccdc74a    | 1.513463 | 1.49113  | 1.237437 | 1.442661 | 1.469418 | 1.507376  |
| ENSMUSG Narf       | 6.332445 | 5.524044 | 5.181458 | 5.499227 | 5.23764  | 5.898234  |
| ENSMUSG Cav2       | 166.8512 | 161.323  | 152.2711 | 93.99633 | 93.77295 | 83.223136 |
| ENSMUSG Paxx       | 16.70681 | 17.32558 | 17.11292 | 14.74658 | 16.15393 | 14.149859 |
| ENSMUSG A430005L   | 13.40847 | 15.45746 | 14.90454 | 13.14629 | 12.13678 | 11.837246 |
| ENSMUSG Ddi1       | 0.015859 | 0.015683 | 0        | 0.003204 | 0        | 0         |
| ENSMUSG Cd52       | 31.10274 | 26.16623 | 54.11676 | 160.3235 | 131.05   | 147.35904 |
| ENSMUSG Slc2a10    | 2.502877 | 2.367345 | 2.318773 | 1.93426  | 2.057093 | 1.964437  |
| ENSMUSG Skil       | 17.9427  | 16.05303 | 17.24396 | 15.36626 | 15.41523 | 15.334634 |
| ENSMUSG Zmat3      | 3.746648 | 4.19479  | 3.716498 | 3.888369 | 4.38214  | 4.864492  |
| ENSMUSG Olfr284    | 0        | 0        | 0        | 0        | 0        | 0         |
| ENSMUSG Pik3ca     | 16.09808 | 17.7163  | 15.43682 | 13.71515 | 14.28197 | 12.819824 |
| ENSMUSG Zfp639     | 11.73372 | 11.44061 | 13.97827 | 10.59802 | 9.002103 | 9.839724  |
| ENSMUSG Gnb4       | 8.430971 | 7.649447 | 8.241323 | 6.245544 | 5.876354 | 5.258687  |
| ENSMUSG Mfn1       | 11.72667 | 11.3311  | 10.31191 | 9.637742 | 10.14697 | 9.279419  |
| ENSMUSG Gm813      | 0        | 0        | 0        | 0        | 0        | 0         |
| Mus_musc Mus_musc  | 0.332015 | 0.303177 | 0.18383  | 0.198124 | 0.398779 | 0.206456  |
| ENSMUSG Lipm       | 0        | 0        | 0        | 0.172599 | 0.081492 | 0.043711  |
| ENSMUSG Il11       | 0.100528 | 0.112426 | 0.50082  | 0.146383 | 0.123184 | 0.207623  |
| ENSMUSG S100a9     | 65.61441 | 52.86051 | 88.31925 | 52.03493 | 23.68608 | 24.767655 |
| ENSMUSG Grik2      | 0.337856 | 0.30348  | 0.151159 | 0.113396 | 0.167718 | 0.063186  |
| ENSMUSG Eif3b      | 58.5869  | 54.2813  | 55.25808 | 48.48056 | 53.50753 | 55.609187 |
| ENSMUSG Olfr587-ps | 0        | 0        | 0        | 0        | 0        | 0         |
| ENSMUSG Naf1       | 3.937855 | 3.669232 | 3.932963 | 3.218698 | 3.621613 | 3.470001  |
| ENSMUSG Dnajb9     | 32.10112 | 31.96421 | 32.11682 | 36.9278  | 37.34936 | 35.000306 |
| ENSMUSG Phactr3    | 0        | 0.045486 | 0.059813 | 0        | 0        | 0.008152  |
| ENSMUSG Mtif2      | 5.70579  | 6.637905 | 5.582391 | 7.294848 | 6.535101 | 6.49102   |

|                   |          |          |          |          |          |           |
|-------------------|----------|----------|----------|----------|----------|-----------|
| ENSMUSG Olfr177   | 0        | 0        | 0        | 0        | 0        | 0         |
| ENSMUSG Dhrr3     | 37.92702 | 46.05841 | 38.88567 | 43.63017 | 47.30997 | 50.837927 |
| ENSMUSG Gm10436   | 0        | 0        | 0        | 0        | 0        | 0         |
| ENSMUSG Adgrf2    | 0.066074 | 0.119256 | 0        | 0.054738 | 0.045252 | 0.016826  |
| ENSMUSG Olfr884   | 0        | 0        | 0        | 0        | 0        | 0         |
| ENSMUSG Gm10717   | 0        | 0        | 0        | 0        | 0        | 0         |
| ENSMUSG Ascl4     | 0.221037 | 0.080752 | 0.050282 | 0.093265 | 0.025559 | 0.041119  |
| ENSMUSG Kik1b1    | 0        | 0        | 0        | 0        | 0        | 0         |
| Mus_musc Mus_musc | 0        | 0        | 0        | 0.440644 | 0.319592 | 0.247247  |
| Mus_musc Mus_musc | 0        | 0        | 0        | 0        | 0        | 0         |
| Mus_musc Mus_musc | 0        | 0        | 0        | 0        | 0.186692 | 0         |
| Mus_musc Mus_musc | 0.098964 | 0.074177 | 0        | 0        | 0        | 0.431707  |
| Mus_musc Mus_musc | 0.230002 | 0.401932 | 0.328396 | 0.765188 | 0.656623 | 0.912065  |
| Mus_musc Mus_musc | 0        | 0.031765 | 0.234226 | 0.193332 | 0.165593 | 0.350716  |
| Mus_musc Mus_musc | 15.58582 | 19.27493 | 16.08792 | 20.12166 | 20.95532 | 19.353281 |
| ENSMUSG Ugt1a8    | 0        | 0        | 0        | 0        | 0        | 0         |
| ENSMUSG Agxt2     | 0        | 0        | 0        | 0.022009 | 0.030722 | 0         |
| Mus_musc Mus_musc | 0        | 0        | 0        | 0        | 0        | 0.184186  |
| Mus_musc Mus_musc | 0        | 0        | 0        | 0.236616 | 0        | 0         |
| Mus_musc Mus_musc | 0.102603 | 0        | 0        | 0        | 0.131166 | 0         |
| Mus_musc Mus_musc | 0.616249 | 0.022314 | 0.146487 | 0        | 0        | 0         |
| Mus_musc Mus_musc | 0.117439 | 0        | 0        | 0        | 0.400783 | 0         |
| Mus_musc Mus_musc | 0.319228 | 0.099383 | 0.370021 | 0.12537  | 0.209056 | 0.664601  |
| Mus_musc Mus_musc | 0        | 0.154309 | 0        | 0        | 0        | 0         |
| ENSMUSG Wdr61     | 26.83542 | 26.58909 | 28.78233 | 28.67198 | 24.97697 | 24.247227 |
| ENSMUSG Gm38394   | 13.14599 | 15.28556 | 8.799876 | 15.7012  | 17.13075 | 12.4055   |
| ENSMUSG Sstr5     | 0.033915 | 0        | 0        | 0        | 0        | 0.039425  |
| ENSMUSG Fam131a   | 7.400191 | 7.603832 | 6.770643 | 6.459738 | 6.035826 | 7.721446  |
| ENSMUSG Slc29a4   | 0.609324 | 0.686486 | 0.566255 | 0.577502 | 0.626748 | 0.469362  |
| ENSMUSG Plac1     | 0        | 0        | 0        | 0        | 0        | 0.039567  |
| ENSMUSG Lsamp     | 0.447386 | 0.413889 | 0.253627 | 0.410404 | 0.109301 | 0.086288  |
| ENSMUSG Myl4      | 9.260004 | 81.62915 | 12.62682 | 33.09277 | 21.35361 | 13.630634 |
| ENSMUSG Olfr723   | 0        | 0        | 0        | 0        | 0        | 0         |
| ENSMUSG Vmn2r21   | 0        | 0        | 0        | 0        | 0        | 0         |
| Mus_musc Mus_musc | 0.309319 | 0        | 0.054378 | 0.440797 | 0.138    | 0.125134  |
| Mus_musc Mus_musc | 0.083301 | 0        | 0        | 0.270809 | 0.286719 | 0.210688  |
| ENSMUSG Olfr192   | 0        | 0        | 0        | 0        | 0        | 0         |
| Mus_musc Mus_musc | 3.98092  | 3.412114 | 3.999693 | 3.11016  | 3.46124  | 3.074153  |
| Mus_musc Mus_musc | 0        | 0        | 0        | 0        | 0        | 0         |
| Mus_musc Mus_musc | 0.593758 | 0.481775 | 0.648018 | 0.474449 | 0.330631 | 0.250034  |
| Mus_musc Mus_musc | 0.107859 | 0.256612 | 0.412193 | 0.622007 | 0.210645 | 0.801969  |
| Mus_musc Mus_musc | 0.303969 | 0.422496 | 0.277326 | 0.515565 | 1.169744 | 0.865808  |
| Mus_musc Mus_musc | 0        | 0.167251 | 0.425739 | 0.254174 | 0.119058 | 0         |
| ENSMUSG Smagp     | 39.74293 | 32.1356  | 39.09333 | 22.40554 | 25.20268 | 22.71657  |
| ENSMUSG Kmt2a     | 10.71021 | 10.70433 | 9.054745 | 9.879237 | 10.45712 | 10.394914 |
| ENSMUSG Shisa7    | 0.540312 | 0.481298 | 0.454163 | 0.08243  | 0.229964 | 0.052287  |
| ENSMUSG Ltbp2     | 19.37514 | 16.48744 | 22.47172 | 12.73717 | 13.65819 | 13.060606 |
| ENSMUSG 3110082i1 | 7.807144 | 6.429083 | 5.29609  | 5.714693 | 4.439561 | 5.65984   |
| ENSMUSG Vmn1r9    | 0        | 0        | 0        | 0        | 0        | 0.016305  |
| ENSMUSG Gm45213   | 0        | 0        | 0        | 0        | 0        | 0         |
| ENSMUSG Rbm8a2    | 0.02108  | 0.083498 | 0.037878 | 0.038497 | 0.044371 | 0.022163  |
| ENSMUSG Chml      | 2.908867 | 3.241744 | 2.500603 | 2.45339  | 2.822221 | 2.379612  |
| ENSMUSG Zic3      | 0        | 0        | 0        | 0        | 0        | 0         |
| ENSMUSG Ms4a14    | 0.032846 | 0.054522 | 0.093383 | 0.305833 | 0.306678 | 0.317753  |
| ENSMUSG Tcaf1     | 11.88498 | 11.49628 | 11.51629 | 9.283561 | 9.620822 | 8.984778  |
| ENSMUSG Ndufa2    | 37.58123 | 39.40201 | 48.8036  | 49.9396  | 48.41661 | 51.286724 |
| ENSMUSG Dennd3    | 29.38353 | 26.46795 | 28.91137 | 21.0961  | 20.56514 | 18.921078 |
| ENSMUSG Irf1      | 59.8526  | 58.42965 | 130.965  | 83.79153 | 44.66182 | 50.672503 |
| ENSMUSG Mb        | 3.125783 | 22.99301 | 2.701951 | 4.219853 | 1.536088 | 1.547231  |
| ENSMUSG Sirt5     | 5.043226 | 4.64631  | 3.982884 | 4.447799 | 2.888199 | 3.607025  |
| ENSMUSG Raet1d    | 0        | 0.021657 | 0        | 0        | 0        | 0         |
| ENSMUSG Abracl    | 25.65612 | 23.02646 | 31.73788 | 41.80219 | 35.28244 | 37.646978 |
| ENSMUSG Nt5dc3    | 5.578341 | 5.889846 | 5.500875 | 4.550207 | 4.795879 | 5.361274  |
| ENSMUSG Ppil6     | 2.942481 | 4.185236 | 1.922835 | 5.391083 | 4.00444  | 4.770131  |

|                   |          |          |          |          |          |           |
|-------------------|----------|----------|----------|----------|----------|-----------|
| ENSMUSG Olfr853   | 0        | 0        | 0        | 0        | 0        | 0         |
| ENSMUSG Bcl2a1d   | 10.06429 | 7.868119 | 12.09983 | 23.20769 | 22.39522 | 24.748505 |
| ENSMUSG Olfr1475  | 0        | 0        | 0        | 0        | 0        | 0         |
| ENSMUSG Olfr1286  | 0        | 0        | 0        | 0        | 0        | 0         |
| ENSMUSG Gm11236   | 0        | 0        | 0        | 0        | 0        | 0         |
| ENSMUSG Gm21854   | 0        | 0        | 0        | 0        | 0        | 0         |
| ENSMUSG Olfr1329  | 0        | 0        | 0        | 0        | 0        | 0         |
| ENSMUSG Aff3      | 15.73297 | 18.60348 | 10.904   | 10.40331 | 12.2736  | 7.175188  |
| ENSMUSG Myom3     | 0.703383 | 0.601225 | 0.40372  | 0.594995 | 0.601066 | 0.463113  |
| ENSMUSG Prmt9     | 5.122217 | 4.957814 | 4.186895 | 4.350755 | 4.477201 | 5.576812  |
| ENSMUSG Raf1      | 32.36073 | 30.52614 | 30.91422 | 27.30442 | 27.07579 | 30.879234 |
| ENSMUSG H2-M10.6  | 0        | 0        | 0        | 0        | 0        | 0         |
| ENSMUSG Gm4027    | 0        | 0        | 0.009741 | 0        | 0        | 0         |
| Mus_musc Mus_musc | 0.570201 | 0.601473 | 0.433845 | 0.819798 | 0.486383 | 0.859902  |
| ENSMUSG Gm32687   | 0.75834  | 0.642766 | 0.695701 | 0.811574 | 0.95996  | 0.767108  |
| ENSMUSG Spout1    | 8.388652 | 8.559777 | 8.801289 | 8.695502 | 7.304708 | 8.528008  |
| ENSMUSG Dusp26    | 0.504839 | 0.400509 | 0.260901 | 0.155747 | 0.379613 | 0.25102   |
| ENSMUSG Gm8237    | 0.279275 | 0.273182 | 0.119351 | 0.0697   | 0.060805 | 0         |
| ENSMUSG Cyp4f40   | 0        | 0.030042 | 0        | 0.087795 | 0.073072 | 0.019002  |
| ENSMUSG Steap2    | 3.580105 | 3.444216 | 2.326655 | 4.941537 | 5.602418 | 5.665672  |
| ENSMUSG Steap1    | 0.371018 | 0.611843 | 0.169898 | 1.000891 | 0.77242  | 1.34149   |
| ENSMUSG Esr1      | 0.393089 | 0.425074 | 0.307127 | 0.256929 | 0.232872 | 0.355849  |
| ENSMUSG Cyb5rl    | 2.847834 | 2.304369 | 1.728679 | 2.684305 | 1.984253 | 2.989153  |
| ENSMUSG Serac1    | 3.048942 | 2.921141 | 2.802961 | 2.618267 | 2.591758 | 2.911039  |
| ENSMUSG Ccdc170   | 1.948455 | 1.766312 | 1.187848 | 2.069494 | 1.306623 | 1.790235  |
| ENSMUSG Krt10     | 1.076369 | 0.658928 | 0.351608 | 0.822463 | 0.687715 | 0.624891  |
| ENSMUSG Rmnd1     | 4.010998 | 3.367935 | 4.131322 | 3.53092  | 4.516412 | 4.365073  |
| ENSMUSG Iyd       | 4.075364 | 4.026114 | 2.876729 | 2.103513 | 2.491793 | 1.812234  |
| Mus_musc Mus_musc | 0.15665  | 0.252216 | 0.413369 | 0.172336 | 0.057424 | 0.181417  |
| Mus_musc Mus_musc | 0        | 0        | 0        | 0        | 0.182497 | 0         |
| ENSMUSG Akr1c21   | 0        | 0        | 0        | 0        | 0        | 0         |
| ENSMUSG Asb2      | 1.488758 | 2.458041 | 2.124437 | 3.517956 | 2.795463 | 2.950651  |
| ENSMUSG Otub2     | 3.378429 | 3.417251 | 3.36894  | 1.906414 | 2.264931 | 2.734575  |
| ENSMUSG Ppp4r4    | 2.57308  | 2.363505 | 2.475502 | 1.812126 | 2.169201 | 2.029356  |
| ENSMUSG Ifi2712b  | 0.194913 | 0.109555 | 0.114376 | 0        | 0        | 0.303158  |
| ENSMUSG Olfr187   | 0        | 0        | 0        | 0        | 0        | 0         |
| ENSMUSG Defb8     | 0        | 0        | 0        | 0        | 0        | 0         |
| ENSMUSG Pdlim1    | 26.25911 | 26.66956 | 29.68502 | 23.39888 | 22.86901 | 26.053637 |
| ENSMUSG Bcl6b     | 12.07906 | 9.56474  | 13.88329 | 7.72891  | 6.722672 | 7.298585  |
| ENSMUSG Spsb4     | 0.199092 | 0.163727 | 0.198127 | 0.964702 | 1.470545 | 1.749837  |
| ENSMUSG Vps36     | 16.74661 | 16.43838 | 17.30835 | 15.16538 | 15.49933 | 14.879688 |
| ENSMUSG Nek3      | 1.153309 | 1.740598 | 0.748552 | 1.401709 | 1.566192 | 1.046875  |
| ENSMUSG Olfr577   | 0        | 0        | 0        | 0        | 0        | 0         |
| ENSMUSG Mcidas    | 0.076573 | 0.198908 | 0.163961 | 0.629665 | 0.57555  | 0.978814  |
| ENSMUSG Lmtk3     | 0.052638 | 0.021782 | 0        | 0.02577  | 0.068817 | 0.052619  |
| ENSMUSG Olfr294   | 0        | 0        | 0        | 0        | 0        | 0         |
| ENSMUSG Zfp27     | 2.41496  | 2.163156 | 2.050397 | 2.313163 | 1.695743 | 1.764158  |
| ENSMUSG Gsg1l     | 0.444795 | 0.168942 | 0.28202  | 0.093019 | 0.033693 | 0.136579  |
| ENSMUSG Ccdc18    | 0.176705 | 0.125911 | 0.091737 | 0.334256 | 0.302449 | 0.248014  |
| ENSMUSG Rlim      | 11.6477  | 12.33755 | 11.36459 | 10.72786 | 11.55615 | 10.956251 |
| ENSMUSG Pign      | 4.95109  | 5.244385 | 4.701714 | 6.649269 | 6.511677 | 6.592795  |
| ENSMUSG Zar1      | 0        | 0        | 0        | 0        | 0        | 0         |
| ENSMUSG Pepd      | 19.54347 | 17.14855 | 19.88425 | 19.16434 | 19.97292 | 22.014993 |
| ENSMUSG Poteg     | 0        | 0        | 0        | 0        | 0        | 0         |
| ENSMUSG Atad3a    | 8.391547 | 6.368451 | 7.828644 | 7.791888 | 8.104844 | 8.258612  |
| ENSMUSG Ints11    | 12.02582 | 13.00147 | 13.62569 | 12.12302 | 12.21553 | 13.486958 |
| ENSMUSG Arhgef16  | 8.170776 | 6.343843 | 7.315819 | 6.434013 | 5.809981 | 7.739634  |
| ENSMUSG Acap3     | 8.399719 | 7.647005 | 8.470629 | 7.418876 | 7.401763 | 6.906141  |
| ENSMUSG Tprgl     | 89.43785 | 86.41354 | 85.6711  | 67.29873 | 67.68501 | 65.611862 |
| ENSMUSG Ssu72     | 34.02101 | 30.9156  | 31.65888 | 35.40857 | 33.9509  | 33.689616 |
| Mus_musc Mus_musc | 0        | 0.273114 | 0        | 0        | 0        | 0         |
| ENSMUSG Fmo4      | 4.452035 | 3.447088 | 2.928338 | 2.146843 | 1.550061 | 1.540327  |
| ENSMUSG Pctp      | 2.281167 | 2.137691 | 2.387596 | 3.227511 | 2.665765 | 2.696269  |
| Mus_musc Mus_musc | 0.008447 | 0.030388 | 0.08306  | 0.01326  | 0.138289 | 0.009561  |

|                   |          |          |          |          |          |           |
|-------------------|----------|----------|----------|----------|----------|-----------|
| ENSMUSG Tmem54    | 0.866175 | 1.052933 | 0.969109 | 1.002549 | 1.613286 | 1.571886  |
| ENSMUSG Hpca      | 0        | 0.083283 | 0        | 0        | 0.076142 | 0         |
| ENSMUSG 2610028H  | 23.78644 | 22.91901 | 18.10221 | 15.3142  | 15.32882 | 17.46836  |
| ENSMUSG Adgrb2    | 0.452592 | 0.290433 | 0.364442 | 0.403449 | 0.378288 | 0.536402  |
| ENSMUSG Sema3c    | 85.6632  | 99.55015 | 83.25441 | 52.99115 | 57.8561  | 61.381805 |
| ENSMUSG Azin2     | 12.56041 | 10.44736 | 9.970933 | 9.833077 | 9.073208 | 12.584468 |
| ENSMUSG Bcl2l13   | 7.075007 | 8.061343 | 7.049602 | 7.515823 | 7.337265 | 7.054056  |
| ENSMUSG Cpa5      | 0        | 0        | 0        | 0        | 0        | 0         |
| ENSMUSG Nt5c3     | 10.58735 | 10.29537 | 12.67447 | 11.78599 | 10.38596 | 10.742199 |
| ENSMUSG Fkbp9     | 55.50838 | 55.41211 | 61.54094 | 43.13181 | 45.67442 | 44.497501 |
| ENSMUSG Tmem209   | 8.537819 | 7.608774 | 8.112703 | 7.536498 | 6.019336 | 7.218344  |
| ENSMUSG Ssmem1    | 0        | 0        | 0.034165 | 0.038569 | 0.031348 | 0.041236  |
| ENSMUSG Avl9      | 9.992603 | 10.72019 | 8.610765 | 9.656899 | 9.338984 | 9.408942  |
| ENSMUSG Bend3     | 1.720471 | 1.412866 | 1.446923 | 1.416102 | 1.764695 | 1.497062  |
| ENSMUSG Cep44     | 6.128837 | 5.655187 | 5.396417 | 5.989965 | 6.351706 | 6.348982  |
| ENSMUSG Pnmt      | 0.241475 | 0.278984 | 0.508272 | 0.242627 | 0        | 0.102148  |
| ENSMUSG Tlcd2     | 6.49479  | 6.528879 | 6.790287 | 6.325228 | 5.648764 | 6.206095  |
| ENSMUSG Hoxa11    | 0        | 0        | 0        | 0        | 0        | 0         |
| ENSMUSG Olfr57    | 0        | 0        | 0        | 0        | 0        | 0         |
| ENSMUSG Mfsd14b   | 22.63456 | 20.4698  | 20.35846 | 17.00816 | 19.04686 | 16.437878 |
| ENSMUSG Tapbpl    | 17.87698 | 17.25761 | 30.9522  | 22.73471 | 18.26942 | 20.699339 |
| ENSMUSG Adam4     | 0.066607 | 0.141861 | 0.167857 | 0.096668 | 0.114073 | 0.217213  |
| ENSMUSG Gm4787    | 0.261602 | 0.120399 | 0.086756 | 0.195118 | 0.251816 | 0.095108  |
| ENSMUSG Tctn3     | 4.57831  | 4.951428 | 4.099554 | 3.127873 | 3.414771 | 4.065602  |
| ENSMUSG Zscan10   | 0        | 0        | 0        | 0.067723 | 0.090163 | 0.03072   |
| ENSMUSG Cyp2c39   | 0        | 0        | 0        | 0        | 0        | 0         |
| ENSMUSG Cyp2c55   | 0        | 0.130331 | 0        | 0.78678  | 0.161239 | 0.142825  |
| ENSMUSG Hells     | 0.678802 | 0.4573   | 0.633021 | 1.424562 | 1.187443 | 1.558952  |
| ENSMUSG Aldh18a1  | 2.511046 | 2.28794  | 2.27168  | 6.067002 | 5.864056 | 7.28743   |
| ENSMUSG Sorbs1    | 29.39006 | 24.1445  | 24.81974 | 12.18176 | 13.40346 | 15.352205 |
| ENSMUSG Cyp2c40   | 0        | 0        | 0        | 0        | 0        | 0         |
| ENSMUSG Prss51    | 0        | 0        | 0        | 0        | 0        | 0         |
| Mus_musc Mus_musc | 1.237029 | 0.596139 | 1.848351 | 0.749728 | 1.791091 | 1.203689  |
| Mus_musc Mus_musc | 0.739124 | 0.316357 | 0.532098 | 0.139768 | 0.22457  | 0.131002  |
| Mus_musc Mus_musc | 0        | 0        | 0        | 0        | 0        | 0         |
| Mus_musc Mus_musc | 0        | 0        | 0.209519 | 0        | 0        | 0         |
| Mus_musc Mus_musc | 4.158294 | 5.061918 | 3.656438 | 6.500092 | 7.523608 | 6.070418  |
| Mus_musc Mus_musc | 0.143089 | 0.921846 | 0.520854 | 1.557539 | 0.809089 | 1.273941  |
| ENSMUSG Cox8a     | 133.5776 | 154.9823 | 150.4548 | 180.8333 | 178.8934 | 177.00501 |
| ENSMUSG Tmed3     | 27.30152 | 27.81625 | 28.00123 | 38.57399 | 44.72294 | 47.531136 |
| ENSMUSG Lrrc1     | 9.401006 | 9.74553  | 8.620047 | 7.08563  | 7.663941 | 6.678888  |
| Mus_musc Mus_musc | 1.305685 | 0.767568 | 0.398159 | 2.467511 | 1.827332 | 2.012689  |
| ENSMUSG Gclc      | 28.79    | 31.58024 | 26.75327 | 46.24229 | 51.80451 | 53.127941 |
| ENSMUSG Tinag     | 2.948348 | 4.834771 | 3.768973 | 5.376723 | 5.084364 | 4.380433  |
| ENSMUSG Rasgrf1   | 0.300908 | 0.790156 | 0.60476  | 0.351369 | 0.379322 | 0.413352  |
| ENSMUSG Mlip      | 0.054835 | 0.787934 | 0.042936 | 0.317806 | 0.207839 | 0.076513  |
| ENSMUSG Wdr20     | 10.8361  | 11.77856 | 10.74603 | 9.106795 | 8.988864 | 9.614069  |
| ENSMUSG Ctsh      | 131.9426 | 145.1291 | 149.5763 | 174.9381 | 193.8333 | 185.02937 |
| ENSMUSG Fam83b    | 1.824185 | 1.379532 | 1.051959 | 0.78148  | 1.102599 | 0.862812  |
| ENSMUSG A4gnt     | 0        | 0        | 0        | 0        | 0        | 0         |
| ENSMUSG Zfyve19   | 5.66088  | 6.522181 | 6.445986 | 5.778768 | 5.457238 | 6.46387   |
| ENSMUSG Mgam      | 0.27695  | 0.456964 | 0.376597 | 0.490464 | 0.288263 | 0.464422  |
| ENSMUSG Gm1043    | 0.065845 | 0.051372 | 0.072868 | 0.13677  | 0.101203 | 0.176205  |
| ENSMUSG Gm7072    | 3.244273 | 3.581442 | 3.389932 | 4.188192 | 3.288035 | 3.624     |
| ENSMUSG Mrm1      | 2.184793 | 3.336868 | 3.414325 | 2.650146 | 2.514279 | 3.524523  |
| ENSMUSG Mtmr4     | 11.51269 | 11.98231 | 12.96404 | 12.52913 | 10.84849 | 14.009074 |
| ENSMUSG Dlg5      | 6.57987  | 7.098774 | 5.471181 | 5.92296  | 6.412529 | 6.11363   |
| ENSMUSG Ngly1     | 13.06817 | 13.57363 | 12.50233 | 12.95562 | 12.98324 | 13.229028 |
| ENSMUSG Oxsm      | 2.818143 | 2.994726 | 3.066234 | 4.068532 | 3.420219 | 3.110248  |
| ENSMUSG Per3      | 16.75783 | 14.93955 | 13.62968 | 6.351136 | 7.473571 | 5.889217  |
| ENSMUSG Fpr-rs6   | 0        | 0        | 0        | 0        | 0        | 0         |
| ENSMUSG Sftpa1    | 1140.143 | 1235.251 | 1042.837 | 1469.498 | 1510.907 | 1609.8815 |
| ENSMUSG Fpr-rs7   | 0        | 0        | 0        | 0        | 0        | 0         |
| ENSMUSG Amph      | 2.898566 | 2.598589 | 3.335425 | 2.418144 | 2.29454  | 2.305314  |



|                   |          |          |          |          |          |           |
|-------------------|----------|----------|----------|----------|----------|-----------|
| ENSMUSG Mapre3    | 19.4457  | 18.7059  | 19.46353 | 17.94664 | 17.27183 | 20.155897 |
| ENSMUSG Gli3      | 0.762542 | 0.88521  | 0.582704 | 0.715884 | 0.67632  | 0.859566  |
| ENSMUSG Adh6a     | 0        | 0        | 0        | 0        | 0        | 0         |
| ENSMUSG Sdhaf2    | 9.581565 | 10.12648 | 10.42968 | 10.37718 | 10.07446 | 10.861793 |
| ENSMUSG Cd5       | 2.495302 | 1.65585  | 1.579622 | 3.774236 | 3.440181 | 3.701897  |
| ENSMUSG Corin     | 0.313684 | 0.886034 | 0.327179 | 4.014232 | 6.072976 | 6.774725  |
| ENSMUSG Incenp    | 3.045209 | 3.476133 | 3.421049 | 5.842929 | 6.483848 | 6.278896  |
| ENSMUSG Fth1      | 2366.945 | 2253.417 | 2351.374 | 2044.718 | 2273.238 | 2291.0779 |
| ENSMUSG Rab3il1   | 3.927488 | 3.211222 | 3.731064 | 13.73779 | 14.5945  | 14.619822 |
| ENSMUSG Fads3     | 47.41763 | 46.85111 | 47.80986 | 33.79224 | 32.48266 | 35.156342 |
| ENSMUSG Fads2     | 23.13597 | 22.20866 | 22.39636 | 27.00666 | 24.32438 | 34.03315  |
| ENSMUSG Tmem138   | 4.672168 | 4.182577 | 3.952469 | 3.497729 | 3.513049 | 4.280687  |
| ENSMUSG Tmem216   | 7.852201 | 8.780474 | 8.25332  | 6.381269 | 6.653077 | 5.640207  |
| ENSMUSG Ppp1r9a   | 17.91858 | 18.74349 | 14.87402 | 10.82014 | 10.26132 | 11.485513 |
| ENSMUSG Ank2      | 0.272842 | 0.497319 | 0.275761 | 0.3236   | 0.424015 | 0.412515  |
| Mus_musc Mus_musc | 0.14259  | 0.06797  | 0.279937 | 0.573057 | 0.434282 | 0.217077  |
| ENSMUSG Ccnt2     | 12.03231 | 12.08718 | 11.66056 | 10.42248 | 9.178124 | 8.898021  |
| ENSMUSG Sh2d3c    | 40.17464 | 38.37955 | 43.47548 | 21.37859 | 24.17347 | 22.665217 |
| Mus_musc Mus_musc | 0.568144 | 0        | 0        | 0.116725 | 0.293538 | 0.260128  |
| ENSMUSG Zdhhc23   | 1.580559 | 1.496352 | 1.829986 | 1.853385 | 1.52275  | 1.617319  |
| ENSMUSG Lzts1     | 1.934649 | 1.847903 | 2.17443  | 1.280499 | 1.460887 | 1.490282  |
| Mus_musc Mus_musc | 1.239763 | 3.385727 | 1.903847 | 3.41592  | 2.520407 | 6.23119   |
| ENSMUSG Skp1a     | 108.9119 | 110.9103 | 102.0636 | 84.97229 | 82.87965 | 80.426923 |
| ENSMUSG Ece2      | 0        | 0.112158 | 0.032708 | 0.124728 | 0        | 0         |
| ENSMUSG Clcn2     | 1.145786 | 1.176751 | 1.099199 | 1.421733 | 1.140511 | 0.987166  |
| ENSMUSG Adcy5     | 3.258796 | 3.029565 | 2.985126 | 1.670237 | 2.352436 | 2.418628  |
| ENSMUSG Ap2m1     | 87.22845 | 74.18008 | 80.03148 | 77.66511 | 84.80733 | 95.652779 |
| ENSMUSG Thpo      | 0.12974  | 0.223321 | 0.094405 | 0.044418 | 0        | 0.299062  |
| ENSMUSG Pdia5     | 11.80297 | 8.794266 | 10.69631 | 9.338049 | 10.06844 | 9.308432  |
| ENSMUSG Dirc2     | 9.798546 | 8.917403 | 8.426828 | 7.121453 | 8.029605 | 8.04037   |
| ENSMUSG Hspbap1   | 2.011525 | 1.770972 | 2.380053 | 2.117716 | 1.721288 | 2.193739  |
| ENSMUSG Ror2      | 0.871834 | 0.612435 | 0.773376 | 0.551437 | 0.419999 | 0.670697  |
| ENSMUSG Actr3     | 84.24108 | 83.96654 | 99.09371 | 114.1074 | 113.9898 | 120.79486 |
| ENSMUSG Zfp719    | 3.125343 | 3.019229 | 2.753088 | 2.68302  | 2.503917 | 2.541393  |
| ENSMUSG Siglecg   | 1.286321 | 0.895102 | 0.959694 | 3.36009  | 2.555374 | 3.095892  |
| ENSMUSG 4933421I0 | 0        | 0        | 0        | 0        | 0        | 0         |
| ENSMUSG Psd3      | 7.628937 | 4.063291 | 5.415719 | 5.081689 | 3.279712 | 5.38742   |
| ENSMUSG Hbb-bt    | 2118.303 | 1875.225 | 2798.472 | 873.1398 | 876.3325 | 637.96838 |
| ENSMUSG Adam33    | 2.763808 | 2.226469 | 2.693781 | 2.587117 | 1.613169 | 1.752614  |
| ENSMUSG Aadacl4   | 0        | 0        | 0        | 0        | 0        | 0         |
| ENSMUSG Chac1     | 2.246729 | 1.794116 | 1.123214 | 2.034299 | 3.0376   | 2.161066  |
| ENSMUSG Atrn      | 15.82001 | 14.45104 | 12.9663  | 11.16597 | 12.10547 | 11.585515 |
| ENSMUSG Spint1    | 27.20719 | 23.44832 | 21.97247 | 23.32301 | 22.83569 | 23.603146 |
| ENSMUSG Dll4      | 47.7292  | 34.85318 | 41.96483 | 27.42937 | 28.15813 | 24.157917 |
| ENSMUSG Ppp1r14d  | 0.834076 | 1.610196 | 1.028936 | 1.7081   | 2.121084 | 2.205627  |
| ENSMUSG Vsig10l   | 0.80892  | 0.725596 | 0.873218 | 0.714749 | 0.985812 | 0.964337  |
| ENSMUSG Ang       | 9.033719 | 8.480164 | 8.329532 | 8.637054 | 7.048963 | 11.913927 |
| ENSMUSG Msx2      | 0        | 0.014091 | 0        | 0        | 0        | 0         |
| ENSMUSG Olfr608   | 0        | 0        | 0        | 0        | 0        | 0         |
| ENSMUSG Slc44a4   | 3.900817 | 4.526908 | 2.998176 | 7.711316 | 6.978602 | 7.428888  |
| ENSMUSG Eml2      | 28.80142 | 28.70048 | 26.78678 | 27.36518 | 25.91202 | 27.834519 |
| ENSMUSG Tex264    | 31.23039 | 30.52471 | 33.84805 | 33.91132 | 34.28064 | 35.380303 |
| ENSMUSG Agbl2     | 1.178843 | 1.818243 | 0.947307 | 1.992131 | 1.627209 | 2.036097  |
| ENSMUSG Dennd6a   | 11.799   | 11.84115 | 10.00349 | 8.951086 | 9.316872 | 9.727291  |
| Mus_musc Mus_musc | 0.211457 | 0.188123 | 0.121723 | 0.099687 | 0.060431 | 0.125386  |
| Mus_musc Mus_musc | 160.3625 | 170.1749 | 198.0633 | 170.075  | 185.3159 | 179.07431 |
| Mus_musc Mus_musc | 1.003443 | 1.359476 | 1.059547 | 0.614591 | 0.370086 | 0.699159  |
| Mus_musc Mus_musc | 0.077797 | 0.222214 | 0.207507 | 0        | 0.213987 | 0         |
| Mus_musc Mus_musc | 0.124619 | 0.172863 | 0.421886 | 0        | 0        | 0         |
| ENSMUSG Olfr146   | 0        | 0        | 0        | 0        | 0        | 0         |
| ENSMUSG Olfr209   | 0        | 0        | 0        | 0        | 0        | 0         |
| ENSMUSG Catsperz  | 0        | 0        | 0.04523  | 0.166441 | 0.079123 | 0.07075   |
| ENSMUSG Wdfy1     | 20.65427 | 22.08326 | 19.26233 | 20.27525 | 18.1476  | 21.152112 |
| ENSMUSG 2510009E0 | 14.00694 | 13.94546 | 13.19448 | 13.09774 | 13.57673 | 13.613717 |

|                   |          |          |          |          |          |           |
|-------------------|----------|----------|----------|----------|----------|-----------|
| ENSMUSG Ccdc121   | 1.302782 | 1.898199 | 0.677324 | 2.38581  | 2.703908 | 1.928842  |
| ENSMUSG 1700034I2 | 0.018686 | 0.039432 | 0.027484 | 0.011117 | 0        | 0         |
| ENSMUSG Gpr135    | 0.312132 | 0.223479 | 0.419069 | 0.21799  | 0.429926 | 0.357438  |
| ENSMUSG Ccr4      | 0.47581  | 0.330183 | 0.226393 | 0.772061 | 1.135329 | 0.757692  |
| ENSMUSG Ang2      | 0        | 0        | 0        | 0.047583 | 0.143698 | 0.059713  |
| ENSMUSG Ripply2   | 0        | 0        | 0        | 0        | 0        | 0         |
| Mus_musc Mus_musc | 0.811749 | 0.703224 | 1.492411 | 0.780367 | 0.800514 | 0.890466  |
| Mus_musc Mus_musc | 0.385025 | 0.148278 | 0.58105  | 0.216649 | 0.541034 | 0.180323  |
| Mus_musc Mus_musc | 0        | 0        | 0        | 0        | 0.186692 | 0         |
| Mus_musc Mus_musc | 0.087884 | 0        | 0        | 0        | 0        | 0.480486  |
| Mus_musc Mus_musc | 0.222391 | 0.485575 | 0        | 0.207067 | 0.3159   | 0.308479  |
| Mus_musc Mus_musc | 0.435758 | 0.751062 | 0.474014 | 0.491028 | 0.876493 | 0.963266  |
| Mus_musc Mus_musc | 0        | 0        | 0        | 0        | 0        | 0         |
| Mus_musc Mus_musc | 7.093118 | 10.33918 | 7.236635 | 11.19153 | 11.56609 | 10.217094 |
| Mus_musc Mus_musc | 0        | 0        | 0        | 0        | 0        | 0         |
| Mus_musc Mus_musc | 0.071259 | 0        | 0.24057  | 0.212855 | 0.14803  | 0.516337  |
| Mus_musc Mus_musc | 1.942697 | 2.420553 | 1.467981 | 2.935987 | 2.391408 | 2.78022   |
| ENSMUSG Mrps12    | 13.61415 | 14.51794 | 13.73585 | 15.77643 | 16.69423 | 18.085271 |
| ENSMUSG Gm10271   | 0        | 0        | 0        | 0.046851 | 0.081379 | 0.133417  |
| ENSMUSG Lyz1      | 368.7909 | 444.0847 | 463.1978 | 217.1054 | 191.9593 | 258.42777 |
| ENSMUSG Lyz2      | 3710.277 | 3915.387 | 3560.34  | 3818.147 | 3375.682 | 4084.3447 |
| ENSMUSG BC049762  | 0.253003 | 0.05228  | 0.041325 | 0.27252  | 0.262596 | 0         |
| ENSMUSG Tomm7     | 13.03852 | 14.31332 | 14.66193 | 15.98304 | 14.16555 | 14.79695  |
| ENSMUSG Rint1     | 4.848703 | 4.688401 | 4.014401 | 5.472354 | 5.414873 | 5.05664   |
| ENSMUSG Nmnat1    | 2.730042 | 2.829879 | 2.481373 | 2.503009 | 2.217458 | 2.555058  |
| ENSMUSG Lzic      | 8.302702 | 7.083974 | 7.141929 | 6.797294 | 7.595299 | 7.362109  |
| ENSMUSG Mtor      | 8.445663 | 8.260413 | 8.080868 | 7.772887 | 7.487436 | 8.055549  |
| ENSMUSG Rbp7      | 1.44684  | 1.197829 | 1.165086 | 0.264277 | 0.404148 | 0.537383  |
| ENSMUSG Fam126a   | 14.33531 | 15.83087 | 13.83153 | 11.8842  | 12.87996 | 13.634363 |
| ENSMUSG Rhoj      | 29.30382 | 29.4744  | 29.01261 | 20.63901 | 23.49964 | 21.070121 |
| Mus_musc Mus_musc | 2.268886 | 3.016979 | 0        | 4.466539 | 9.49241  | 11.195916 |
| ENSMUSG Fam83h    | 4.896821 | 4.446184 | 3.539903 | 3.292494 | 3.231293 | 3.961332  |
| Mus_musc Mus_musc | 0        | 0        | 0.232902 | 0        | 0        | 0.083152  |
| Mus_musc Mus_musc | 0.655931 | 0.815009 | 0.813566 | 0.601897 | 0.51111  | 0.405868  |
| Mus_musc Mus_musc | 0        | 0        | 0.268171 | 0        | 0        | 0         |
| Mus_musc Mus_musc | 0        | 0.233802 | 0        | 0.055369 | 0        | 0.398136  |
| Mus_musc Mus_musc | 0        | 0        | 0        | 0        | 0        | 0         |
| Mus_musc Mus_musc | 0        | 0        | 0        | 0.472321 | 0        | 0         |
| ENSMUSG Gpr33     | 0.035357 | 0        | 0.127797 | 0.101677 | 0.108142 | 0.060644  |
| ENSMUSG Nubpl     | 1.721271 | 1.70311  | 1.589764 | 1.579924 | 1.513456 | 1.584575  |
| ENSMUSG Mindy2    | 19.6914  | 19.67432 | 16.31658 | 14.28138 | 15.4168  | 13.727802 |
| ENSMUSG Bhlhe23   | 0        | 0        | 0        | 0        | 0        | 0         |
| ENSMUSG Zmym4     | 5.914246 | 6.129095 | 5.167953 | 4.844585 | 5.283725 | 4.96234   |
| ENSMUSG Krtap4-6  | 0        | 0        | 0        | 0        | 0        | 0         |
| ENSMUSG Hoxd1     | 0        | 0        | 0        | 0        | 0        | 0.029577  |
| ENSMUSG Pcdhb3    | 0.578046 | 0.704803 | 0.790748 | 0.446597 | 0.5409   | 0.611068  |
| ENSMUSG Fnbp4     | 10.13644 | 8.096006 | 9.970762 | 8.356484 | 7.790953 | 8.23514   |
| ENSMUSG Cers4     | 7.264989 | 6.088628 | 5.93376  | 4.505338 | 4.172067 | 3.793887  |
| Mus_musc Mus_musc | 0.29292  | 0.151685 | 0        | 0        | 0        | 0.368372  |
| ENSMUSG Smarcd2   | 31.97703 | 31.17232 | 32.52149 | 29.55988 | 29.01113 | 32.545481 |
| Mus_musc Mus_musc | 0        | 0        | 0        | 0.149157 | 0        | 0.153632  |
| Mus_musc Mus_musc | 0        | 0        | 0        | 0        | 0        | 0.344273  |
| ENSMUSG Trim30c   | 0.167512 | 0.078414 | 0.545418 | 0.068856 | 0.135232 | 0.264687  |
| ENSMUSG Gm5901    | 0        | 0        | 0        | 0        | 0        | 0         |
| Mus_musc Mus_musc | 0.197915 | 1.156001 | 0        | 0.547888 | 0.216867 | 0.278691  |
| ENSMUSG Spaca7    | 0        | 0        | 0        | 0        | 0        | 0         |
| ENSMUSG Hspb1     | 79.79982 | 77.19315 | 76.81658 | 29.60206 | 64.29721 | 63.395982 |
| ENSMUSG Rasa4     | 3.614499 | 3.687532 | 5.987521 | 7.211996 | 6.92464  | 7.386444  |
| ENSMUSG Rln3      | 0.275272 | 0.216617 | 0.063684 | 0.573649 | 1.082462 | 0.947078  |
| ENSMUSG Krtap5-4  | 0        | 0        | 0        | 0        | 0        | 0         |
| ENSMUSG 1110012L1 | 10.17432 | 8.180507 | 9.454712 | 9.381443 | 8.558837 | 10.456021 |
| ENSMUSG Dnali1    | 7.443323 | 9.578104 | 5.815732 | 11.53532 | 11.10761 | 9.844193  |
| ENSMUSG Erich5    | 0.023672 | 0.133264 | 0        | 0.105374 | 0        | 0.047071  |
| ENSMUSG Gpr152    | 0.023588 | 0        | 0        | 0        | 0.01428  | 0.026534  |

|                   |          |          |          |          |          |           |
|-------------------|----------|----------|----------|----------|----------|-----------|
| ENSMUSG Topors    | 13.19826 | 13.69602 | 12.27307 | 12.21559 | 12.41459 | 11.834921 |
| Mus_musc Mus_musc | 0        | 0        | 0        | 0        | 0        | 0         |
| Mus_musc Mus_musc | 0        | 0        | 0        | 0.174016 | 0        | 0         |
| Mus_musc Mus_musc | 1.661592 | 1.600587 | 1.349549 | 0.852947 | 1.568791 | 1.295282  |
| Mus_musc Mus_musc | 0.128726 | 0.319183 | 0.101196 | 0.185929 | 0.273876 | 0         |
| Mus_musc Mus_musc | 0.168834 | 0.178049 | 0        | 0        | 0.340746 | 0         |
| Mus_musc Mus_musc | 0.119824 | 0.445152 | 0        | 0        | 0.275463 | 0.357086  |
| ENSMUSG Mdn1      | 2.394727 | 2.282291 | 2.304835 | 2.323852 | 2.192048 | 2.520938  |
| ENSMUSG Tdpoz3    | 0        | 0        | 0        | 0        | 0        | 0         |
| ENSMUSG Rtl10     | 1.22269  | 1.362818 | 1.31685  | 1.196296 | 1.990548 | 1.237279  |
| ENSMUSG Gm12248   | 0.296452 | 0.141644 | 0.342148 | 0.403617 | 0.380447 | 0.392055  |
| ENSMUSG Efhc1     | 2.770309 | 3.652801 | 1.823581 | 5.024129 | 4.506454 | 4.284262  |
| ENSMUSG Pramel1   | 0        | 0        | 0        | 0        | 0        | 0         |
| ENSMUSG Phlda3    | 31.73407 | 25.70448 | 34.45285 | 27.46581 | 24.02672 | 31.915178 |
| ENSMUSG Dpysl3    | 8.20227  | 7.927783 | 6.9227   | 8.76671  | 8.946618 | 8.957429  |
| ENSMUSG Ppp2r2b   | 1.503382 | 2.013077 | 0.748943 | 1.198574 | 1.515112 | 1.171348  |
| ENSMUSG Spink1    | 0        | 0        | 0        | 0        | 0        | 0         |
| ENSMUSG Jakmip2   | 0        | 0.038237 | 0        | 0        | 0.031851 | 0         |
| ENSMUSG Zfp811    | 0.052166 | 0.185307 | 0.043285 | 0.186664 | 0.131888 | 0.156215  |
| ENSMUSG Sertad3   | 7.79998  | 7.40522  | 8.270741 | 7.126021 | 6.621468 | 8.122766  |
| Mus_musc Mus_musc | 0.310589 | 0.095414 | 0.11913  | 0.192458 | 0.138941 | 0.52265   |
| Mus_musc Mus_musc | 0.164522 | 0.101444 | 0.311281 | 0.080832 | 0        | 0         |
| Mus_musc Mus_musc | 0        | 0        | 0        | 0.174016 | 0        | 0         |
| Mus_musc Mus_musc | 0.102218 | 0.075601 | 0.297055 | 0.107738 | 0.130779 | 0.136285  |
| ENSMUSG H2-Q10    | 0.919078 | 1.016679 | 3.623296 | 1.923679 | 1.616503 | 1.486048  |
| ENSMUSG Cyp2c65   | 0        | 0        | 0        | 0.044497 | 0        | 0.022068  |
| ENSMUSG Olfr522   | 0        | 0        | 0        | 0        | 0        | 0         |
| ENSMUSG Olfr655   | 0        | 0        | 0        | 0        | 0        | 0         |
| ENSMUSG Fam174a   | 16.5454  | 13.37174 | 14.95127 | 12.50425 | 11.01865 | 11.92002  |
| ENSMUSG Zfp524    | 8.062831 | 7.916182 | 9.796762 | 8.982793 | 8.048981 | 9.440004  |
| ENSMUSG Lrrc4c    | 0.300097 | 0.392476 | 0.185499 | 0.115712 | 0.104734 | 0.179808  |
| ENSMUSG Slc48a1   | 65.71357 | 57.00858 | 62.66942 | 53.5245  | 55.4777  | 56.513913 |
| Mus_musc Mus_musc | 0        | 0.094046 | 0.125952 | 0        | 0        | 0         |
| Mus_musc Mus_musc | 0.282526 | 0        | 0        | 0.12675  | 0.472951 | 0.349178  |
| Mus_musc Mus_musc | 0.186786 | 0.414898 | 0.10069  | 0.299169 | 0.39465  | 0.105145  |
| Mus_musc Mus_musc | 0.287267 | 0.192752 | 0.136793 | 0.228946 | 0.162817 | 0.299813  |
| Mus_musc Mus_musc | 0.098989 | 0.306904 | 0.234468 | 0        | 0        | 0         |
| Mus_musc Mus_musc | 1.698214 | 1.60941  | 2.233555 | 0.9513   | 1.336658 | 0.752177  |
| ENSMUSG S1pr3     | 13.12668 | 13.33923 | 13.30156 | 10.09699 | 10.5701  | 10.205767 |
| ENSMUSG Swsap1    | 7.774045 | 6.640756 | 5.88703  | 6.233433 | 6.182685 | 5.310637  |
| ENSMUSG Tmem199   | 9.39529  | 8.124721 | 9.806198 | 8.963253 | 8.803716 | 8.533348  |
| ENSMUSG Msrb3     | 33.2355  | 32.82513 | 33.1184  | 21.92033 | 24.85785 | 21.92383  |
| ENSMUSG Gen1      | 0.275196 | 0.176219 | 0.132186 | 0.525388 | 0.518301 | 0.631159  |
| ENSMUSG Rnf7      | 43.11605 | 39.79576 | 39.16617 | 38.37466 | 35.94571 | 38.605484 |
| ENSMUSG Tgif1     | 8.584619 | 10.07669 | 9.892228 | 12.94437 | 12.77219 | 13.537193 |
| ENSMUSG Gm15262   | 0        | 0        | 0        | 0        | 0        | 0         |
| ENSMUSG Ctdspl    | 45.06033 | 44.21992 | 40.8759  | 23.36776 | 26.14784 | 23.592078 |
| Mus_musc Mus_musc | 0.335691 | 0.204523 | 0.045873 | 0.078605 | 0.238428 | 0.303784  |
| Mus_musc Mus_musc | 0        | 0        | 0        | 0        | 0        | 0         |
| Mus_musc Mus_musc | 0.110175 | 0        | 0        | 0        | 0        | 0         |
| Mus_musc Mus_musc | 2.005495 | 1.759813 | 2.977449 | 1.219243 | 1.157604 | 0.484834  |
| Mus_musc Mus_musc | 0        | 0.31943  | 0        | 0        | 0        | 0         |
| Mus_musc Mus_musc | 0.179799 | 0        | 0        | 0        | 0        | 0.271925  |
| Mus_musc Mus_musc | 1.433579 | 2.890266 | 2.354255 | 1.156787 | 1.099497 | 1.38727   |
| Mus_musc Mus_musc | 0.489578 | 0.22632  | 0.271549 | 0.24749  | 0        | 0         |
| Mus_musc Mus_musc | 0        | 0        | 0        | 0.438902 | 0        | 0         |
| Mus_musc Mus_musc | 6.906088 | 16.12126 | 5.34279  | 5.859436 | 3.440849 | 3.531224  |
| Mus_musc Mus_musc | 0        | 0.196564 | 0        | 0.213196 | 0.321883 | 0.311585  |
| Mus_musc Mus_musc | 0.343463 | 0.332824 | 0        | 0        | 0        | 0         |
| Mus_musc Mus_musc | 0        | 0.263069 | 0        | 0        | 0.304781 | 0.261855  |
| ENSMUSG Cacng3    | 0        | 0        | 0        | 0        | 0        | 0         |
| ENSMUSG Krtap7-1  | 0        | 0        | 0        | 0        | 0        | 0         |
| ENSMUSG Olfr747   | 0        | 0        | 0        | 0        | 0        | 0         |
| ENSMUSG Ccdc189   | 3.557683 | 3.079921 | 3.094082 | 4.463074 | 4.804588 | 4.697118  |

|                    |          |          |          |          |          |           |
|--------------------|----------|----------|----------|----------|----------|-----------|
| ENSMUSG Gsk3a      | 41.86644 | 36.97432 | 40.68684 | 31.52472 | 33.03403 | 34.620331 |
| ENSMUSG Krtap19-9l | 0        | 0        | 0        | 0        | 0        | 0         |
| ENSMUSG Rfx8       | 0.139057 | 0.039499 | 0        | 0        | 0        | 0.056045  |
| ENSMUSG Prl3d1     | 0        | 0        | 0        | 0        | 0        | 0         |
| ENSMUSG Rxra       | 23.86324 | 23.14702 | 22.72021 | 21.20666 | 21.0114  | 20.230329 |
| ENSMUSG Cdh23      | 0.0799   | 0.071272 | 0.079094 | 0.127707 | 0.117457 | 0.101273  |
| ENSMUSG Rxrg       | 0.158713 | 0.400852 | 0.069896 | 0.351249 | 0.437897 | 0.685557  |
| ENSMUSG E2f4       | 22.99866 | 24.1497  | 25.11516 | 23.59063 | 23.93172 | 25.355602 |
| ENSMUSG Spdya      | 0.336687 | 0.177729 | 0.63858  | 0.307634 | 0.429856 | 0.233569  |
| ENSMUSG Cyp2j5     | 0        | 0        | 0        | 0        | 0        | 0         |
| ENSMUSG Spats2l    | 5.426081 | 4.493303 | 5.106104 | 3.370973 | 3.344333 | 3.422756  |
| ENSMUSG Ly6g6c     | 0.182033 | 0.31886  | 0.623823 | 0.18089  | 0.359879 | 0.276464  |
| ENSMUSG Ier5       | 20.1631  | 15.60662 | 17.449   | 17.05178 | 16.74948 | 18.55654  |
| ENSMUSG Abhd18     | 1.927275 | 2.404045 | 2.01671  | 2.196144 | 2.05665  | 2.203245  |
| Mus_musc Mus_musc  | 1.753966 | 1.445171 | 1.293407 | 1.991083 | 2.27868  | 2.361344  |
| ENSMUSG Fbxw17     | 6.654692 | 5.265703 | 6.281977 | 5.520224 | 4.377829 | 5.56791   |
| ENSMUSG Ctnna1     | 209.3445 | 198.8469 | 189.8613 | 129.2852 | 134.7484 | 127.69201 |
| Mus_musc Mus_musc  | 0        | 0        | 0        | 0        | 0        | 0.184186  |
| ENSMUSG D630003M   | 0.264785 | 0.323655 | 0.408558 | 0.434239 | 0.445722 | 0.515345  |
| Mus_musc Mus_musc  | 0        | 0        | 0        | 0        | 0        | 0         |
| Mus_musc Mus_musc  | 0        | 0        | 0        | 0.269841 | 0.187569 | 0.330896  |
| ENSMUSG Defb37     | 0        | 0        | 0        | 0        | 0        | 0         |
| ENSMUSG Mast1      | 1.430691 | 1.318818 | 2.000326 | 2.041297 | 1.868878 | 1.774645  |
| ENSMUSG Dnaic1     | 2.336055 | 2.975943 | 2.410588 | 3.987258 | 3.175629 | 3.135989  |
| ENSMUSG Vmp1       | 27.67893 | 28.37284 | 26.63121 | 33.89376 | 31.398   | 33.107468 |
| ENSMUSG Zswim8     | 22.27934 | 21.13584 | 22.58366 | 18.34156 | 18.55459 | 19.306458 |
| ENSMUSG Rnasek     | 16.17613 | 20.81271 | 18.42234 | 16.48973 | 18.09968 | 21.057221 |
| ENSMUSG Ecd        | 9.608567 | 9.403918 | 9.033689 | 9.604253 | 9.533023 | 9.61935   |
| ENSMUSG Dnajc9     | 14.6808  | 16.11146 | 16.05608 | 16.52428 | 16.19622 | 16.348251 |
| ENSMUSG Olfr493    | 0        | 0        | 0        | 0        | 0        | 0         |
| ENSMUSG Anxa7      | 51.02392 | 45.04773 | 47.63874 | 40.50173 | 39.55535 | 43.449797 |
| ENSMUSG Vmn1r120   | 0        | 0        | 0        | 0        | 0        | 0         |
| ENSMUSG Ppp3cb     | 18.9704  | 17.88533 | 19.17413 | 18.63576 | 15.47729 | 17.675285 |
| ENSMUSG Tmem259    | 44.36302 | 41.65249 | 50.65857 | 40.79072 | 38.94883 | 39.705813 |
| ENSMUSG Ncs1       | 0.626085 | 0.837807 | 0.640817 | 1.002285 | 1.055601 | 1.288948  |
| ENSMUSG Gstt2      | 10.99231 | 10.52166 | 8.798136 | 10.58621 | 10.23425 | 11.387572 |
| ENSMUSG Fem1c      | 10.43203 | 11.21324 | 9.434432 | 10.36235 | 10.69187 | 10.67772  |
| ENSMUSG Lmf1       | 8.309669 | 6.919934 | 6.434445 | 7.590228 | 7.482204 | 7.508327  |
| ENSMUSG 2610528A   | 0        | 0.335428 | 0.319724 | 0.069237 | 0.117116 | 0.184186  |
| ENSMUSG Olfr773    | 0        | 0        | 0        | 0        | 0        | 0         |
| ENSMUSG Gm3500     | 0.258631 | 0.023679 | 0.080803 | 0.010485 | 0.09559  | 0         |
| ENSMUSG Vmn2r53    | 0        | 0        | 0        | 0        | 0        | 0         |
| ENSMUSG Fbxl8      | 3.73771  | 3.926163 | 4.976083 | 4.162826 | 3.821875 | 4.843966  |
| ENSMUSG Olfr134    | 0        | 0        | 0        | 0        | 0        | 0         |
| ENSMUSG Galnt9     | 0.136703 | 0.145991 | 0.566007 | 0.353465 | 0.862104 | 0.659962  |
| ENSMUSG Metrnl     | 5.636184 | 4.927065 | 6.513772 | 7.623517 | 7.538279 | 7.319887  |
| ENSMUSG Hist1h3i   | 0.410375 | 0        | 0.234292 | 0.351137 | 0.135818 | 0.691035  |
| ENSMUSG Adgrb1     | 0        | 0        | 0.029621 | 0        | 0        | 0.022831  |
| ENSMUSG Rpl41      | 356.3924 | 502.1298 | 499.0582 | 682.1277 | 637.2382 | 536.69613 |
| ENSMUSG Ifnl3      | 0        | 0        | 0        | 0        | 0        | 0         |
| ENSMUSG H3f3a      | 179.2761 | 127.4848 | 119.0546 | 123.8916 | 158.136  | 119.5687  |
| ENSMUSG Olfr1076   | 0        | 0        | 0        | 0        | 0        | 0         |
| ENSMUSG Nos1ap     | 1.372609 | 1.281939 | 0.764659 | 1.394607 | 1.39269  | 1.398539  |
| ENSMUSG Calca      | 1.949783 | 2.502389 | 1.172954 | 1.253946 | 0.980201 | 1.142341  |
| ENSMUSG Pik3c2a    | 10.85751 | 11.81689 | 9.163222 | 11.33181 | 10.50486 | 10.320086 |
| ENSMUSG 1110004F1  | 44.17792 | 39.65922 | 44.78367 | 42.38029 | 35.77402 | 41.566508 |
| ENSMUSG lpo5       | 18.46533 | 17.81032 | 17.40521 | 17.46257 | 18.61338 | 18.595411 |
| ENSMUSG Hoxd8      | 0.196098 | 0.193502 | 0.143217 | 0.076818 | 0.141189 | 0.041047  |
| ENSMUSG Calcbl     | 2.370951 | 1.762024 | 1.648646 | 1.49257  | 0.422818 | 2.684395  |
| ENSMUSG Eea1       | 10.31542 | 10.60608 | 9.803297 | 9.990199 | 9.685324 | 9.6726    |
| ENSMUSG Scgb1b10   | 0        | 0        | 0        | 0        | 0        | 0         |
| ENSMUSG Hist1h3d   | 0.334362 | 0.614636 | 0.732012 | 0.587295 | 0.58063  | 0.416742  |
| ENSMUSG Rnf39      | 15.83613 | 13.82184 | 14.73505 | 8.105662 | 10.20059 | 8.949519  |
| ENSMUSG Chrna1     | 0.054575 | 0        | 0.013134 | 0.078517 | 0        | 0.039516  |

|                   |          |          |          |          |          |           |
|-------------------|----------|----------|----------|----------|----------|-----------|
| ENSMUSG Ass1      | 13.21194 | 10.26634 | 14.27615 | 14.09536 | 14.57444 | 15.540062 |
| ENSMUSG Olfr1217  | 0        | 0        | 0        | 0        | 0        | 0         |
| ENSMUSG Gm28510   | 0        | 0        | 0        | 0        | 0        | 0         |
| ENSMUSG Tmem211   | 0        | 0        | 0        | 0.078579 | 0.067749 | 0.073796  |
| ENSMUSG Gm28961   | 0        | 0        | 0        | 0        | 0        | 0         |
| ENSMUSG Cnot4     | 8.313068 | 7.847122 | 6.9663   | 7.046282 | 8.079829 | 7.30932   |
| ENSMUSG 1700028J1 | 0.269889 | 0.184676 | 0.186847 | 0.582939 | 0.302066 | 0.073527  |
| ENSMUSG Smurf1    | 17.93382 | 16.24404 | 17.2911  | 15.22618 | 16.19025 | 18.565557 |
| ENSMUSG Lrcol1    | 0        | 0        | 0.046779 | 0.319561 | 0.146617 | 0.281583  |
| ENSMUSG Gm2042    | 0        | 0        | 0        | 0        | 0        | 0         |
| ENSMUSG Pafah2    | 8.133692 | 8.913297 | 7.75279  | 7.880851 | 6.662874 | 7.580587  |
| ENSMUSG Sf3b6     | 26.01773 | 27.76848 | 27.89243 | 27.94161 | 29.61961 | 25.607273 |
| ENSMUSG Letm2     | 1.40605  | 1.011395 | 1.387964 | 1.296034 | 1.586059 | 1.182169  |
| ENSMUSG Nov       | 1.990485 | 2.649827 | 1.474379 | 2.057988 | 1.616265 | 2.382866  |
| ENSMUSG Ankrd31   | 0        | 0        | 0        | 0        | 0        | 0         |
| ENSMUSG Muc16     | 1.392516 | 2.045313 | 0.889127 | 0.84103  | 0.538304 | 1.413555  |
| ENSMUSG D730001G  | 0        | 0.047114 | 0        | 0.093315 | 0.066701 | 0.124051  |
| ENSMUSG Fbxw27    | 0        | 0        | 0        | 0        | 0        | 0         |
| ENSMUSG Zfp597    | 3.603715 | 4.257711 | 4.183156 | 3.269619 | 3.418515 | 3.213671  |
| ENSMUSG Odc1      | 24.45808 | 23.06746 | 20.39082 | 27.71677 | 23.77863 | 27.777117 |
| ENSMUSG Defb5     | 0        | 0        | 0        | 0        | 0        | 0         |
| ENSMUSG Cercam    | 1.612846 | 2.036711 | 1.663609 | 3.136434 | 2.533515 | 3.155472  |
| ENSMUSG Zfp955b   | 3.546592 | 3.513682 | 3.451254 | 3.118776 | 3.531156 | 2.945214  |
| ENSMUSG Cep131    | 3.538268 | 3.083018 | 3.144213 | 3.008254 | 3.121114 | 3.389649  |
| ENSMUSG Zfp850    | 0.738119 | 0.83851  | 1.007336 | 0.707989 | 0.760491 | 0.660879  |
| ENSMUSG Btbd35f6  | 0        | 0        | 0        | 0        | 0        | 0         |
| ENSMUSG Cpeb2     | 4.907205 | 5.266789 | 6.063483 | 4.566468 | 5.167248 | 4.196929  |
| ENSMUSG Fndc9     | 0.096397 | 0.131129 | 0.284167 | 0.264064 | 0.279712 | 0.403279  |
| ENSMUSG Tbc1d12   | 5.009391 | 6.053422 | 5.1137   | 3.515982 | 3.354097 | 3.644778  |
| ENSMUSG Cldn34b4  | 0        | 0        | 0        | 0        | 0        | 0         |
| ENSMUSG Mtmr7     | 0.691758 | 1.195255 | 0.968916 | 1.127302 | 1.275328 | 1.432659  |
| ENSMUSG Krtap27-1 | 0        | 0        | 0        | 0        | 0        | 0         |
| ENSMUSG Zfp454    | 0.935699 | 0.825698 | 0.807881 | 0.54205  | 0.657332 | 0.475958  |
| ENSMUSG Ttc36     | 4.631756 | 4.771945 | 2.902354 | 4.65398  | 3.522557 | 6.178121  |
| ENSMUSG Mtcp1     | 3.449745 | 3.164676 | 4.381673 | 3.383344 | 2.433087 | 2.496121  |
| ENSMUSG Brcc3     | 5.477396 | 6.618832 | 6.133771 | 5.76889  | 6.010893 | 5.730225  |
| ENSMUSG Rab39b    | 0.324369 | 0.21234  | 0.300419 | 0.817738 | 1.060375 | 0.697265  |
| ENSMUSG Asb12     | 0        | 0        | 0        | 0        | 0        | 0         |
| ENSMUSG Msn       | 345.2469 | 309.1602 | 331.7529 | 226.1877 | 230.9412 | 232.6471  |
| ENSMUSG Heph      | 3.865643 | 3.95298  | 3.275493 | 3.118276 | 2.474798 | 2.681895  |
| ENSMUSG Cdca3     | 0.56467  | 0.672238 | 0.499665 | 1.987876 | 2.082476 | 2.84927   |
| ENSMUSG Dpep2nb   | 0.031179 | 0        | 0        | 0.14126  | 0        | 0         |
| ENSMUSG Mzt2      | 9.150923 | 8.621329 | 9.899741 | 7.725395 | 10.18072 | 10.397724 |
| ENSMUSG Mcm4      | 10.04926 | 10.19181 | 9.436112 | 8.442086 | 9.769513 | 9.205822  |
| ENSMUSG Prkdc     | 2.330299 | 2.516503 | 1.845735 | 2.335403 | 2.446375 | 2.562602  |
| ENSMUSG Ube2v2    | 6.010918 | 4.825711 | 7.381996 | 2.141064 | 6.433597 | 6.284995  |
| ENSMUSG Fopnl     | 14.87162 | 16.62806 | 13.2183  | 14.19027 | 11.74633 | 13.494062 |
| ENSMUSG Snai2     | 3.371354 | 3.20354  | 3.600238 | 2.186266 | 2.569445 | 1.970273  |
| ENSMUSG Mpv17l    | 6.303767 | 5.705796 | 4.595629 | 4.192884 | 3.70781  | 3.995814  |
| ENSMUSG Nde1      | 23.4758  | 21.2902  | 26.99527 | 18.08978 | 18.6844  | 20.521356 |
| Mus_musc Mus_musc | 0        | 0        | 0        | 0.123806 | 0        | 0         |
| Mus_musc Mus_musc | 0.501199 | 0.519208 | 1.196044 | 1.352696 | 0.848823 | 0.732578  |
| Mus_musc Mus_musc | 0        | 0.206096 | 0.032178 | 0.140913 | 0        | 0.101073  |
| Mus_musc Mus_musc | 0        | 0.098909 | 0.15941  | 0.036677 | 0        | 0         |
| Mus_musc Mus_musc | 4.856229 | 5.067815 | 6.702154 | 4.956757 | 4.151668 | 5.095148  |
| ENSMUSG Rpa3      | 10.46241 | 11.22888 | 13.87004 | 13.01797 | 11.8264  | 10.454082 |
| Mus_musc Mus_musc | 0        | 0        | 0.290827 | 0        | 0        | 0.239364  |
| ENSMUSG Sntg1     | 0        | 0        | 0        | 0.010682 | 0.028919 | 0         |
| ENSMUSG Gm5152    | 0        | 0        | 0        | 2.874434 | 1.947015 | 2.110654  |
| ENSMUSG Sox17     | 50.99708 | 45.99091 | 50.9294  | 22.87718 | 23.9178  | 26.818451 |
| ENSMUSG Lypla1    | 27.7668  | 31.84515 | 26.5342  | 28.54071 | 28.83901 | 28.394843 |
| ENSMUSG Rp1       | 1.8201   | 2.617825 | 1.285396 | 3.108944 | 3.507911 | 2.797042  |
| ENSMUSG Rb1cc1    | 12.87364 | 12.70967 | 11.12112 | 11.35473 | 10.83418 | 10.097256 |
| ENSMUSG Oprk1     | 0        | 0        | 0.010082 | 0        | 0        | 0         |

|                    |          |          |          |          |          |           |
|--------------------|----------|----------|----------|----------|----------|-----------|
| ENSMUSG Ddx54      | 17.09748 | 15.51908 | 17.23896 | 16.69914 | 16.91736 | 16.487535 |
| ENSMUSG Plbd2      | 16.71453 | 13.57759 | 16.00452 | 14.22771 | 16.7545  | 16.238241 |
| ENSMUSG Ung        | 0.46107  | 0.784473 | 0.389784 | 1.799895 | 1.759387 | 1.967965  |
| ENSMUSG Usp30      | 6.032133 | 6.08865  | 5.723398 | 5.247151 | 5.156983 | 5.357631  |
| ENSMUSG Lhx5       | 0        | 0        | 0        | 0        | 0        | 0         |
| ENSMUSG Rbm19      | 3.750336 | 3.684086 | 4.071161 | 3.558912 | 3.960788 | 4.436385  |
| ENSMUSG Sds        | 0        | 0.109666 | 0.04686  | 0.089357 | 0.215862 | 0.131562  |
| ENSMUSG Sdsl       | 0.177076 | 0.354542 | 0.256037 | 0.21344  | 0.3061   | 0.467703  |
| ENSMUSG Trim17     | 0.32446  | 0.435246 | 0.370609 | 0.282184 | 0.279201 | 0.252561  |
| ENSMUSG Asb4       | 0.107799 | 0.066072 | 0.092507 | 0.255395 | 0.329126 | 0.237243  |
| ENSMUSG Kcna4      | 0.070394 | 0.092193 | 0.073293 | 0.010132 | 0.022129 | 0.020909  |
| ENSMUSG Atxn2      | 13.90253 | 14.01609 | 13.70196 | 13.1773  | 12.52901 | 12.187281 |
| ENSMUSG Clca2      | 0.081892 | 0.023228 | 0.023904 | 0.085306 | 0.061544 | 0         |
| ENSMUSG Wnt8b      | 0        | 0        | 0        | 0.011546 | 0        | 0         |
| ENSMUSG Cfap221    | 0.37508  | 1.027381 | 0.398715 | 0.911547 | 0.647928 | 0.648735  |
| ENSMUSG Cnpy4      | 10.11437 | 11.43371 | 11.32878 | 9.204233 | 8.559689 | 8.926278  |
| ENSMUSG Stk40      | 20.95209 | 23.58073 | 23.87042 | 17.02287 | 16.83857 | 18.283913 |
| ENSMUSG Wnt6       | 0        | 0.088815 | 0        | 0.075623 | 0.153136 | 0.12789   |
| Mus_musc Mus_musc  | 0.251003 | 0.216369 | 0.348241 | 0.334839 | 0.308352 | 0.196206  |
| ENSMUSG Glp2r      | 0        | 0.00836  | 0        | 0        | 0.042832 | 0.07853   |
| ENSMUSG Lpar4      | 0.383117 | 0.489872 | 0.382956 | 0.397962 | 0.187441 | 0.274019  |
| ENSMUSG Slc35c1    | 9.907179 | 10.24996 | 10.78842 | 13.07821 | 12.18399 | 13.95381  |
| ENSMUSG Olfr921    | 0        | 0.016292 | 0        | 0.044204 | 0        | 0         |
| ENSMUSG Gstm7      | 1.429958 | 2.368842 | 1.342887 | 1.463809 | 1.588259 | 1.473062  |
| ENSMUSG Crtam      | 0.111418 | 0.060855 | 0.130134 | 0.262316 | 0.105962 | 0.198823  |
| ENSMUSG Sstr1      | 0.337038 | 0.251691 | 0.04085  | 0.281415 | 0.181409 | 0.34807   |
| ENSMUSG Rabgap1    | 16.16048 | 16.309   | 13.55509 | 12.9019  | 13.50648 | 12.051251 |
| ENSMUSG Abca17     | 2.415093 | 2.734418 | 2.336873 | 2.231108 | 1.936388 | 2.059075  |
| ENSMUSG Mif4gd     | 27.89233 | 27.72739 | 27.74097 | 31.9231  | 28.70697 | 31.407338 |
| ENSMUSG Haus8      | 4.300558 | 5.180403 | 4.808432 | 5.914646 | 7.741121 | 7.215004  |
| ENSMUSG Gga3       | 7.547896 | 7.273831 | 8.39458  | 8.011205 | 6.846343 | 7.542208  |
| ENSMUSG Tmem94     | 15.49639 | 16.72269 | 15.35222 | 14.07414 | 13.91634 | 15.756329 |
| ENSMUSG Pafah1b1   | 43.807   | 43.09846 | 41.63544 | 34.69843 | 33.74491 | 35.255088 |
| ENSMUSG Slc25a19   | 6.421517 | 7.24024  | 7.730033 | 10.28459 | 9.549672 | 9.841199  |
| ENSMUSG Olfr1      | 0        | 0        | 0        | 0        | 0        | 0         |
| ENSMUSG Ppargc1b   | 0.76056  | 1.056656 | 0.65301  | 1.219186 | 1.419597 | 1.711683  |
| ENSMUSG Olfr377-ps | 0        | 0        | 0        | 0        | 0        | 0         |
| ENSMUSG Pnir       | 22.79441 | 22.21363 | 25.84254 | 22.42643 | 17.72501 | 17.554512 |
| ENSMUSG Sdcbp      | 135.6206 | 129.8351 | 147.3102 | 141.7379 | 143.9835 | 134.37407 |
| ENSMUSG Faxc       | 0.372341 | 0.295461 | 0.198775 | 0.722826 | 0.42903  | 0.507757  |
| ENSMUSG Coq3       | 1.533829 | 2.11161  | 1.917276 | 1.957829 | 1.862029 | 1.757794  |
| ENSMUSG Nsmaf      | 14.63402 | 14.48211 | 13.07343 | 14.34558 | 13.16127 | 14.134261 |
| ENSMUSG Ubxn2b     | 3.298845 | 4.086311 | 3.239444 | 3.003626 | 2.916077 | 3.495823  |
| ENSMUSG Cyp7a1     | 0        | 0        | 0        | 0        | 0        | 0         |
| ENSMUSG Nelfb      | 27.17282 | 28.00741 | 29.43999 | 23.6196  | 22.78986 | 23.780237 |
| ENSMUSG Znrf4      | 0        | 0        | 0        | 0        | 0        | 0         |
| ENSMUSG Tram111    | 0.024562 | 0.090427 | 0.070676 | 0.100812 | 0.039556 | 0.032868  |
| ENSMUSG Olfr1111   | 0        | 0        | 0        | 0        | 0        | 0         |
| ENSMUSG Gzf1       | 9.834966 | 10.02125 | 8.974689 | 8.809255 | 9.006653 | 9.642923  |
| ENSMUSG Tlr6       | 1.567846 | 1.650285 | 2.333636 | 2.438091 | 2.190543 | 2.640669  |
| ENSMUSG Dtd1       | 8.83302  | 10.2802  | 10.05414 | 7.251897 | 7.493139 | 7.06252   |
| ENSMUSG Olfr1136   | 0        | 0        | 0        | 0        | 0        | 0         |
| ENSMUSG Olfr1135   | 0        | 0        | 0        | 0        | 0        | 0         |
| ENSMUSG Nkx2-2     | 0        | 0        | 0        | 0        | 0        | 0         |
| ENSMUSG Olfr1133   | 0        | 0        | 0        | 0        | 0        | 0         |
| ENSMUSG Olfr1128   | 0        | 0        | 0        | 0        | 0        | 0         |
| ENSMUSG Gdf9       | 0.148971 | 0.442845 | 0.433694 | 0.276094 | 0.360057 | 0.20771   |
| ENSMUSG Zcchc10    | 5.643431 | 6.578976 | 6.058279 | 5.071368 | 7.10088  | 5.19879   |
| ENSMUSG Haus1      | 4.911665 | 4.665499 | 4.076426 | 4.345377 | 4.533178 | 4.738515  |
| ENSMUSG Zfp879     | 0.467281 | 0.597383 | 0.304478 | 0.423538 | 0.163646 | 0.418518  |
| ENSMUSG Krt84      | 0        | 0        | 0        | 0        | 0        | 0         |
| ENSMUSG Olfr794    | 0        | 0        | 0        | 0        | 0        | 0         |
| ENSMUSG Olfr978    | 0        | 0        | 0        | 0        | 0        | 0         |
| ENSMUSG Pik3ip1    | 11.33597 | 10.99477 | 12.00582 | 8.528497 | 8.22005  | 7.829105  |

|                   |          |          |          |          |          |           |
|-------------------|----------|----------|----------|----------|----------|-----------|
| ENSMUSG Eif1b     | 25.31394 | 31.15127 | 30.8697  | 28.71306 | 24.45029 | 25.400331 |
| ENSMUSG Kik4      | 0.045164 | 0        | 0.040577 | 0.106305 | 0.289231 | 0.278418  |
| ENSMUSG Mtrr      | 4.08538  | 4.134529 | 3.762123 | 3.18214  | 3.841807 | 3.268333  |
| ENSMUSG Cwf19l2   | 5.360841 | 4.502405 | 4.929375 | 5.113417 | 4.227515 | 3.970113  |
| ENSMUSG Fam241a   | 3.964988 | 3.545839 | 3.914964 | 3.31176  | 3.028026 | 2.666214  |
| ENSMUSG Chst11    | 7.597022 | 7.304326 | 6.933015 | 6.335895 | 7.043912 | 6.543694  |
| ENSMUSG Cela2a    | 0        | 0        | 0        | 0        | 0        | 0         |
| ENSMUSG Ppm1h     | 3.66354  | 3.839456 | 3.305943 | 4.223376 | 4.69104  | 4.654355  |
| ENSMUSG Gpc6      | 1.619959 | 1.253666 | 0.365064 | 1.332164 | 0.904273 | 1.172558  |
| ENSMUSG Gdpd2     | 0.526532 | 0.737716 | 0.205296 | 0.139771 | 0.258556 | 0.25631   |
| ENSMUSG Glrx      | 20.35848 | 21.30813 | 22.47706 | 35.88939 | 38.15391 | 39.934253 |
| ENSMUSG Spata9    | 0.595225 | 0.43665  | 0.432489 | 0.493402 | 0.648744 | 0.392768  |
| ENSMUSG Arsk      | 4.29452  | 3.92665  | 3.574325 | 3.346229 | 3.465844 | 3.321452  |
| ENSMUSG Nsun2     | 16.76212 | 14.63037 | 15.20155 | 16.67234 | 16.65277 | 17.488448 |
| ENSMUSG Srd5a1    | 0.516517 | 0.657565 | 0.59182  | 0.598197 | 0.68082  | 0.71515   |
| ENSMUSG Sif1      | 2.837698 | 3.645793 | 2.59463  | 3.308543 | 3.366771 | 2.940144  |
| ENSMUSG Mctp1     | 5.78715  | 7.045776 | 5.509389 | 5.788315 | 5.542647 | 6.302477  |
| ENSMUSG Gm13304   | 1.482526 | 1.552068 | 1.088429 | 2.338156 | 1.624888 | 1.684654  |
| ENSMUSG ltpka     | 2.798424 | 2.679192 | 2.350935 | 3.029872 | 3.335252 | 2.571212  |
| ENSMUSG Ltk       | 1.308227 | 1.176005 | 1.361384 | 1.684485 | 1.485932 | 1.921013  |
| ENSMUSG Vps39     | 13.94764 | 13.3446  | 11.93469 | 11.53144 | 11.94824 | 11.877441 |
| ENSMUSG Ehd4      | 240.6186 | 203.1511 | 218.2025 | 130.1568 | 130.5719 | 122.37272 |
| ENSMUSG Tyro3     | 4.628783 | 4.699612 | 3.289596 | 3.87621  | 3.670618 | 3.83402   |
| ENSMUSG Hmox1     | 29.80987 | 23.48314 | 21.02033 | 30.30659 | 46.72027 | 52.11338  |
| ENSMUSG Mcm5      | 3.866426 | 3.497826 | 4.256838 | 5.517313 | 7.642994 | 8.332754  |
| ENSMUSG Mprp      | 87.05606 | 89.29456 | 89.15991 | 78.3868  | 66.96903 | 75.804674 |
| ENSMUSG Nek6      | 3.802627 | 3.63043  | 3.544189 | 6.221919 | 7.76964  | 8.424836  |
| ENSMUSG Plxdc2    | 24.03265 | 20.64733 | 22.9397  | 17.0459  | 16.47852 | 18.126008 |
| ENSMUSG Dnajc1    | 11.56945 | 11.34619 | 10.99583 | 9.968402 | 10.74927 | 11.391195 |
| ENSMUSG Mlft10    | 12.56994 | 13.30947 | 14.70118 | 14.20562 | 12.06961 | 11.398898 |
| ENSMUSG Agxt      | 0        | 0        | 0        | 0        | 0        | 0         |
| ENSMUSG Sh3kbp1   | 5.210936 | 5.06529  | 6.409695 | 9.205109 | 9.981573 | 10.939148 |
| ENSMUSG Nt5m      | 5.118458 | 4.569078 | 5.409061 | 5.411558 | 5.887099 | 5.042705  |
| ENSMUSG Abhd4     | 29.24227 | 28.00215 | 26.71126 | 25.92837 | 24.05091 | 25.808136 |
| ENSMUSG Npnt      | 129.1654 | 118.8378 | 133.5512 | 108.2679 | 99.31785 | 97.293674 |
| ENSMUSG Sipa1l3   | 21.76276 | 26.08657 | 18.93321 | 21.04048 | 21.75302 | 20.913607 |
| Mus_musc Mus_musc | 0.069038 | 0        | 0.185422 | 0.329409 | 0        | 0.109962  |
| Mus_musc Mus_musc | 0.296904 | 0.140735 | 0        | 0.068734 | 0        | 0.078872  |
| Mus_musc Mus_musc | 0.387721 | 0.317734 | 0.278918 | 0.464237 | 0.334748 | 0.384121  |
| Mus_musc Mus_musc | 0        | 0        | 0.19037  | 0        | 0        | 0         |
| ENSMUSG Calr      | 217.1947 | 232.2423 | 280.0058 | 347.549  | 358.806  | 360.33789 |
| ENSMUSG Mast2     | 9.220353 | 9.762146 | 10.19701 | 8.890064 | 9.513947 | 9.658954  |
| ENSMUSG Dnase2a   | 15.80124 | 14.66806 | 15.27718 | 21.61145 | 22.40693 | 22.449272 |
| ENSMUSG Rad23a    | 27.52566 | 25.17035 | 27.62862 | 22.50899 | 23.74724 | 22.738123 |
| ENSMUSG Olfr441   | 0        | 0        | 0        | 0        | 0        | 0         |
| ENSMUSG Ppp1cc    | 63.92064 | 59.74935 | 62.75877 | 57.70034 | 56.5309  | 60.757345 |
| ENSMUSG Ralb      | 30.09301 | 29.09157 | 30.12792 | 29.8817  | 29.17299 | 32.819267 |
| ENSMUSG Defa36    | 0        | 0        | 0        | 0        | 0        | 0         |
| ENSMUSG Gm21394   | 0        | 0        | 0        | 0        | 0        | 0         |
| ENSMUSG Helt      | 0        | 0        | 0        | 0        | 0        | 0         |
| Mus_musc Mus_musc | 0        | 0        | 0.199156 | 0.203614 | 0.159866 | 0.097765  |
| Mus_musc Mus_musc | 1.155379 | 0.940016 | 1.438682 | 1.246664 | 0.946233 | 0.791038  |
| Mus_musc Mus_musc | 0.170668 | 0        | 0        | 0        | 0        | 0         |
| Mus_musc Mus_musc | 0        | 0        | 0        | 0        | 0        | 0         |
| ENSMUSG Smarcad1  | 7.243042 | 7.754581 | 7.13719  | 6.333829 | 7.429265 | 7.17062   |
| ENSMUSG Mkrn1     | 37.53228 | 34.09606 | 40.82937 | 32.06314 | 31.38466 | 28.9004   |
| ENSMUSG Rab19     | 3.8128   | 4.721374 | 4.934598 | 5.522996 | 5.273614 | 5.618558  |
| ENSMUSG Slc37a3   | 11.30223 | 13.07464 | 11.95594 | 9.519409 | 10.48223 | 10.238878 |
| ENSMUSG Tbxas1    | 6.988142 | 5.998001 | 6.531693 | 17.94237 | 18.17766 | 20.761591 |
| ENSMUSG Olfr781   | 0        | 0        | 0        | 0        | 0        | 0         |
| ENSMUSG Pou3f2    | 0        | 0        | 0        | 0        | 0        | 0         |
| ENSMUSG Gm21858   | 0        | 0        | 0        | 0        | 0        | 0         |
| Mus_musc Mus_musc | 0        | 0.109293 | 0.317748 | 0.533919 | 0.347643 | 0         |
| Mus_musc Mus_musc | 0.332425 | 0.067056 | 0        | 0.230359 | 0        | 0.251086  |

|          |          |          |          |          |          |          |           |
|----------|----------|----------|----------|----------|----------|----------|-----------|
| Mus_musc | Mus_musc | 0.298152 | 0.513623 | 0.376715 | 0.468442 | 0.361746 | 0.285737  |
| Mus_musc | Mus_musc | 10.57303 | 11.34725 | 5.2493   | 4.301976 | 4.353407 | 5.144509  |
| Mus_musc | Mus_musc | 0.001192 | 0.000167 | 0.000505 | 0        | 0.002031 | 0.004133  |
| Mus_musc | Mus_musc | 0        | 0        | 0        | 0        | 0        | 0         |
| Mus_musc | Mus_musc | 0.469121 | 0.414005 | 0.378441 | 0.272196 | 0.287271 | 0.355765  |
| Mus_musc | Mus_musc | 0.969823 | 1.078057 | 1.67088  | 1.012482 | 1.127747 | 1.516313  |
| Mus_musc | Mus_musc | 0        | 0.499386 | 0        | 0        | 0        | 0         |
| Mus_musc | Mus_musc | 0        | 0        | 0        | 0        | 0        | 0.184186  |
| ENSMUSG  | Hoxa6    | 1.799207 | 1.309157 | 1.280165 | 0.90874  | 0.404785 | 1.613842  |
| ENSMUSG  | Zfp707   | 5.760919 | 5.569755 | 5.367952 | 4.94153  | 4.857717 | 4.700972  |
| ENSMUSG  | Parp14   | 14.6481  | 14.66575 | 25.6745  | 19.06437 | 15.688   | 16.449345 |
| ENSMUSG  | Myo15b   | 0.238421 | 0.231875 | 0.090289 | 0.139383 | 0.197847 | 0.220609  |
| ENSMUSG  | Gcsh     | 10.10394 | 10.23045 | 10.59521 | 10.58337 | 11.95588 | 10.816825 |
| ENSMUSG  | Klhl40   | 0        | 0.047269 | 0        | 0.090312 | 0        | 0.017952  |
| ENSMUSG  | Gucy2d   | 0        | 0        | 0        | 0        | 0        | 0         |
| ENSMUSG  | B3gnt6   | 0.449499 | 0.39277  | 0.536948 | 0.45915  | 0.391652 | 0.425314  |
| ENSMUSG  | Omp      | 0.105066 | 0        | 0.128278 | 0.191548 | 0.189218 | 0.220439  |
| ENSMUSG  | Tnni3k   | 0        | 0.26219  | 0.114758 | 0        | 0        | 0.053605  |
| Mus_musc | Mus_musc | 1.441995 | 1.895985 | 2.557325 | 2.140644 | 1.690327 | 1.630449  |
| Mus_musc | Mus_musc | 0.420693 | 0.321828 | 0.166635 | 0        | 0.074822 | 0         |
| Mus_musc | Mus_musc | 0.330316 | 0.213107 | 0.338175 | 0.409047 | 0.390417 | 0.200331  |
| Mus_musc | Mus_musc | 1.701739 | 1.38029  | 1.686541 | 0.88349  | 2.123007 | 1.382849  |
| Mus_musc | Mus_musc | 23.30577 | 20.13908 | 21.9002  | 17.40787 | 18.14801 | 18.813962 |
| Mus_musc | Mus_musc | 0        | 0        | 0        | 0        | 0        | 0         |
| Mus_musc | Mus_musc | 0        | 0        | 0        | 0        | 0        | 0         |
| Mus_musc | Mus_musc | 0.174832 | 0.285002 | 0.215593 | 0.211863 | 0.11064  | 0.111699  |
| Mus_musc | Mus_musc | 0        | 0        | 0        | 0        | 0.331898 | 0         |
| Mus_musc | Mus_musc | 0        | 0        | 0        | 0.168425 | 0.09672  | 0.083833  |
| Mus_musc | Mus_musc | 0        | 0        | 0        | 0.111549 | 0.337083 | 0.337675  |
| ENSMUSG  | Rhox10   | 0        | 0        | 0        | 0        | 0        | 0         |
| ENSMUSG  | Mat2a    | 58.10833 | 66.20537 | 69.55948 | 44.52931 | 42.2979  | 48.373894 |
| ENSMUSG  | Mc5r     | 0.168452 | 0.302775 | 0.25733  | 0.347882 | 0.152631 | 0.171981  |
| ENSMUSG  | Abhd3    | 2.338224 | 2.848591 | 2.109033 | 3.267016 | 2.679191 | 3.365671  |
| Mus_musc | Mus_musc | 0        | 0        | 0        | 0        | 0        | 0         |
| ENSMUSG  | Snrpd1   | 17.88289 | 16.07069 | 17.94913 | 16.86732 | 17.76774 | 18.632784 |
| Mus_musc | Mus_musc | 0        | 0.296749 | 0.203266 | 0        | 0        | 0.103506  |
| ENSMUSG  | Slc12a7  | 14.70872 | 13.34126 | 16.18713 | 13.64577 | 13.80418 | 15.173294 |
| ENSMUSG  | Pltp     | 308.964  | 256.1774 | 278.6218 | 204.7673 | 210.979  | 207.0121  |
| Mus_musc | Mus_musc | 0.474103 | 0.540983 | 1.043854 | 0.598561 | 0.223377 | 0.248329  |
| Mus_musc | Mus_musc | 0.393802 | 0.636085 | 0.450105 | 0.496473 | 0.355958 | 0.191868  |
| Mus_musc | Mus_musc | 0        | 0        | 0.168936 | 0        | 0        | 0         |
| Mus_musc | Mus_musc | 0.479076 | 0.880011 | 0.451366 | 0.562875 | 0.505842 | 0.519039  |
| Mus_musc | Mus_musc | 0.520116 | 0.108643 | 0.110071 | 0.249188 | 0        | 0         |
| ENSMUSG  | Evi2b    | 1.416983 | 1.557549 | 1.05031  | 13.02219 | 9.287542 | 1.626599  |
| ENSMUSG  | Coa4     | 5.883856 | 6.13919  | 5.849715 | 6.324255 | 5.072655 | 6.267759  |
| ENSMUSG  | Vmn1r58  | 0        | 0        | 0        | 0        | 0        | 0         |
| Mus_musc | Mus_musc | 0.319003 | 0.278321 | 0.894227 | 0.235422 | 0.06566  | 0         |
| Mus_musc | Mus_musc | 0        | 0.154309 | 0        | 0        | 0.122068 | 0         |
| ENSMUSG  | Gzmf     | 0        | 0        | 0        | 0        | 0        | 0         |
| Mus_musc | Mus_musc | 4.856232 | 4.935794 | 4.789225 | 3.074159 | 2.337978 | 2.1473    |
| ENSMUSG  | Gzmn     | 0        | 0        | 0        | 0        | 0        | 0         |
| ENSMUSG  | Bsph2    | 0        | 0        | 0        | 0        | 0        | 0         |
| ENSMUSG  | Gm28897  | 0        | 0        | 0        | 0        | 0        | 0         |
| ENSMUSG  | Olf1r630 | 0        | 0        | 0        | 0        | 0        | 0         |
| ENSMUSG  | Fzd2     | 7.368238 | 6.285206 | 6.329272 | 5.245473 | 5.660249 | 5.082897  |
| Mus_musc | Mus_musc | 0        | 0.462928 | 0.123794 | 0.375989 | 0        | 0.199283  |
| ENSMUSG  | Gm5136   | 0        | 0        | 0        | 0        | 0        | 0         |
| ENSMUSG  | Plcg1    | 33.63615 | 30.76407 | 33.17296 | 23.95502 | 23.79897 | 23.519514 |
| ENSMUSG  | Lrnf5    | 0        | 0        | 0        | 0.023676 | 0        | 0         |
| ENSMUSG  | Prdx3    | 24.19683 | 23.51544 | 24.49043 | 26.50144 | 26.98241 | 26.634293 |
| ENSMUSG  | Flg2     | 0        | 0        | 0        | 0        | 0        | 0         |
| ENSMUSG  | Olf1r664 | 0        | 0        | 0        | 0        | 0        | 0         |
| ENSMUSG  | Nrap     | 0.279808 | 0.73386  | 0.170809 | 0.315671 | 0.315825 | 0.340649  |
| ENSMUSG  | Vmn1r63  | 0        | 0        | 0        | 0        | 0        | 0         |



|                   |          |          |          |          |          |           |
|-------------------|----------|----------|----------|----------|----------|-----------|
| ENSMUSG Rnf166    | 16.3393  | 15.57559 | 15.46847 | 15.2737  | 17.37213 | 15.959795 |
| ENSMUSG Eif3a     | 54.558   | 55.19928 | 54.52447 | 55.92378 | 53.98967 | 56.307674 |
| ENSMUSG Zfp110    | 13.00777 | 11.96591 | 11.74027 | 12.01043 | 11.7491  | 12.007211 |
| ENSMUSG Gm17555   | 0        | 0        | 0        | 0        | 0        | 0         |
| ENSMUSG Ppp1r3g   | 0        | 0.04586  | 0        | 0.021634 | 0.023444 | 0         |
| ENSMUSG Mrgprb2   | 0        | 0.051486 | 0        | 0        | 0        | 0.026604  |
| ENSMUSG Teddm3    | 0        | 0        | 0        | 0        | 0        | 0.006637  |
| ENSMUSG Fbxo46    | 4.152728 | 3.699433 | 3.886224 | 3.491884 | 3.498937 | 4.03333   |
| Mus_musc Mus_musc | 0.59455  | 0.802517 | 1.04554  | 0.562285 | 0.189103 | 0.050803  |
| Mus_musc Mus_musc | 1.203005 | 0.647423 | 0.616838 | 0.699116 | 0.457133 | 0.357137  |
| Mus_musc Mus_musc | 0        | 0.376945 | 0        | 0.34221  | 0.583301 | 0.636997  |
| Mus_musc Mus_musc | 0.477341 | 0.134905 | 1.129935 | 0.868291 | 0.770311 | 0.635101  |
| Mus_musc Mus_musc | 0        | 0        | 0        | 0.174016 | 0        | 0         |
| ENSMUSG Gm45194   | 0        | 0        | 0.011125 | 0.026745 | 0        | 0         |
| Mus_musc Mus_musc | 0.195056 | 0.214171 | 0        | 0        | 0.254824 | 0.147137  |
| Mus_musc Mus_musc | 0        | 0        | 0        | 0.167393 | 0        | 0         |
| Mus_musc Mus_musc | 0        | 0        | 0        | 0.280671 | 0        | 0         |
| Mus_musc Mus_musc | 0        | 0        | 0        | 0        | 0.325626 | 0         |
| Mus_musc Mus_musc | 0.470348 | 0.315544 | 0.252165 | 0.095531 | 0.033166 | 0.450426  |
| Mus_musc Mus_musc | 0        | 0.087457 | 0        | 0        | 0        | 0         |
| Mus_musc Mus_musc | 0.724235 | 0.401083 | 0.189016 | 0.323588 | 0.424734 | 0.452505  |
| Mus_musc Mus_musc | 0.576029 | 0.532044 | 0.089223 | 0.177976 | 0.141081 | 0.195437  |
| ENSMUSG Snrnp25   | 5.905445 | 5.625992 | 7.383292 | 8.920923 | 8.729973 | 8.951026  |
| ENSMUSG Spen      | 10.24531 | 11.41162 | 9.121819 | 9.410036 | 9.966036 | 10.02854  |
| ENSMUSG Appl1     | 8.51899  | 8.831005 | 7.969095 | 7.134977 | 6.984436 | 6.911829  |
| ENSMUSG Trim34a   | 3.724739 | 3.354526 | 4.027973 | 3.413174 | 1.893265 | 2.618086  |
| ENSMUSG Olfr1246  | 0        | 0        | 0        | 0        | 0        | 0         |
| ENSMUSG Rdh9      | 0        | 0        | 0        | 0        | 0        | 0         |
| ENSMUSG Olfr1089  | 0        | 0        | 0        | 0        | 0        | 0         |
| ENSMUSG Olfr1446  | 0        | 0        | 0        | 0        | 0        | 0         |
| ENSMUSG Cfap299   | 2.399301 | 2.128966 | 1.616388 | 4.325541 | 3.174473 | 3.465525  |
| ENSMUSG Scgb2b20  | 0        | 0        | 0        | 0        | 0        | 0         |
| ENSMUSG Btdb35f28 | 0        | 0        | 0        | 0        | 0        | 0         |
| ENSMUSG Btdb35f1  | 0        | 0        | 0        | 0        | 0        | 0         |
| ENSMUSG Tpt1      | 827.8195 | 911.7027 | 898.6582 | 997.9789 | 930.9002 | 951.07725 |
| ENSMUSG Gemin2    | 3.458926 | 3.783395 | 3.598617 | 3.123195 | 3.189465 | 3.867215  |
| ENSMUSG Fbxw21    | 0        | 0        | 0        | 0        | 0        | 0         |
| ENSMUSG Cldn2     | 0.083391 | 0.164955 | 0.156283 | 0.662165 | 0.50402  | 0.532409  |
| ENSMUSG Mageh1    | 11.41924 | 11.91027 | 12.69717 | 9.124124 | 10.08536 | 8.00753   |
| ENSMUSG 4930444P  | 0.237128 | 0.413885 | 0.020888 | 0.887324 | 0.443199 | 0.562175  |
| ENSMUSG Gm6899    | 1.539983 | 1.167993 | 1.267213 | 1.481479 | 1.24875  | 2.147593  |
| ENSMUSG Gm49369   | 0        | 0        | 0        | 0        | 0        | 0         |
| ENSMUSG Tas2r114  | 0        | 0        | 0        | 0        | 0        | 0         |
| Mus_musc Mus_musc | 0        | 0        | 0        | 0        | 0.233497 | 0         |
| ENSMUSG Mthfs     | 6.345375 | 4.755402 | 6.074382 | 9.265797 | 7.018423 | 8.073948  |
| ENSMUSG Zfyve26   | 4.890847 | 4.403057 | 4.444246 | 4.300376 | 5.470395 | 4.81966   |
| ENSMUSG Rdh11     | 7.170028 | 7.227558 | 7.482316 | 7.307878 | 6.948973 | 8.230917  |
| ENSMUSG Dcn       | 53.66143 | 75.01187 | 33.54329 | 55.32456 | 48.06032 | 47.311031 |
| ENSMUSG Gm20489   | 0        | 0        | 0.033835 | 0.074779 | 0        | 0         |
| ENSMUSG Zwint     | 27.58934 | 27.52139 | 28.77322 | 26.52566 | 25.72825 | 25.623314 |
| ENSMUSG Lims1     | 42.51881 | 43.07824 | 41.72371 | 36.15043 | 35.81394 | 36.364735 |
| ENSMUSG Gm38392   | 1.134448 | 1.810016 | 0.854727 | 1.29792  | 1.165329 | 1.367782  |
| ENSMUSG Chchd1    | 23.9174  | 28.13925 | 26.855   | 26.91905 | 26.06207 | 26.766665 |
| ENSMUSG Utp14a    | 6.93125  | 7.278541 | 7.312469 | 6.905221 | 6.94418  | 7.424756  |
| ENSMUSG Olfr282   | 0        | 0        | 0        | 0        | 0        | 0         |
| ENSMUSG Ghrl      | 1.181452 | 1.584578 | 1.045352 | 0.651181 | 1.26045  | 0.921084  |
| ENSMUSG Tnnt1     | 0.851577 | 0.784033 | 0.488064 | 0.391906 | 0.571183 | 0.285671  |
| ENSMUSG Sprr1a    | 0.049691 | 0.391325 | 0        | 0.179198 | 0.136197 | 0.531535  |
| ENSMUSG Msra      | 9.61806  | 9.671042 | 8.900937 | 7.607141 | 7.875891 | 7.450136  |
| ENSMUSG Zfp182    | 2.566281 | 2.428109 | 2.274842 | 2.539453 | 2.404505 | 2.374007  |
| ENSMUSG Asprv1    | 0.897738 | 0.907003 | 2.442967 | 0.777299 | 0.437828 | 0.694836  |
| ENSMUSG Crygs     | 0        | 0        | 0.057921 | 0        | 0        | 0.043994  |
| ENSMUSG Tubb4b    | 169.3393 | 151.7    | 155.5013 | 153.1342 | 155.235  | 173.84355 |
| ENSMUSG Cox6b1    | 72.50231 | 81.39989 | 83.62532 | 93.44978 | 82.31984 | 90.527229 |

|                   |          |          |          |          |          |           |
|-------------------|----------|----------|----------|----------|----------|-----------|
| ENSMUSG Cdc14a    | 8.723227 | 9.102632 | 6.359269 | 8.287669 | 7.643179 | 7.049488  |
| ENSMUSG Calm5     | 0        | 0        | 0        | 0        | 0        | 0.04159   |
| ENSMUSG Vmn1r216  | 0        | 0        | 0        | 0        | 0        | 0         |
| ENSMUSG Kcnc3     | 7.460121 | 7.007889 | 7.49325  | 6.800356 | 4.196322 | 7.030606  |
| ENSMUSG Olfr527   | 0        | 0.020195 | 0        | 0        | 0        | 0.028249  |
| ENSMUSG Gspt2     | 1.588762 | 1.1352   | 1.537224 | 1.121725 | 1.104897 | 1.281408  |
| ENSMUSG Spin4     | 1.422514 | 1.194427 | 1.223805 | 0.787514 | 0.984105 | 0.97703   |
| ENSMUSG Olfr516   | 0        | 0        | 0        | 0        | 0        | 0         |
| ENSMUSG Krtap6-2  | 0        | 0        | 0        | 0        | 0        | 0         |
| ENSMUSG Cyp26c1   | 0        | 0        | 0        | 0        | 0        | 0         |
| ENSMUSG Gm13277   | 0        | 0        | 0        | 0        | 0        | 0         |
| ENSMUSG Gm28557   | 1.389437 | 1.23661  | 1.212945 | 1.121737 | 0.774767 | 0.753902  |
| ENSMUSG Adam1b    | 0.359426 | 0.502215 | 0.44436  | 0.335673 | 0.326535 | 0.220016  |
| ENSMUSG Srd5a3    | 15.36199 | 12.11959 | 13.41481 | 14.48138 | 15.57158 | 15.574864 |
| ENSMUSG Mcpt2     | 0        | 0        | 0        | 2.700284 | 4.19926  | 1.949147  |
| ENSMUSG Pdcl2     | 0        | 0        | 0.030182 | 0        | 0        | 0         |
| ENSMUSG Gm20538   | 0        | 0        | 0        | 0        | 0        | 0.004127  |
| ENSMUSG Gm29423   | 0        | 0        | 0        | 0        | 0        | 0         |
| ENSMUSG Gm3739    | 0        | 0        | 0        | 0.02596  | 0        | 0         |
| ENSMUSG 2610021A  | 3.196334 | 3.686963 | 2.74342  | 3.359503 | 3.14376  | 2.276556  |
| ENSMUSG Gm5799    | 0        | 0        | 0        | 0        | 0.025432 | 0.050466  |
| ENSMUSG Catspere2 | 1.606454 | 1.206632 | 1.214673 | 0.876592 | 0.739289 | 0.743893  |
| ENSMUSG Krtap19-3 | 0        | 0        | 0        | 0        | 0        | 0         |
| ENSMUSG Dppa5a    | 0        | 0        | 0        | 0        | 0        | 0         |
| ENSMUSG Gm3839    | 0        | 0.047771 | 0.027235 | 0.086906 | 0.019629 | 0         |
| ENSMUSG Pla2g15   | 17.46372 | 18.59149 | 20.83116 | 21.45462 | 24.19302 | 26.508528 |
| ENSMUSG Nfatc3    | 15.04805 | 15.02537 | 13.55227 | 13.22129 | 15.02647 | 14.3265   |
| ENSMUSG Dus2      | 2.944776 | 2.689353 | 3.282378 | 3.105509 | 3.164701 | 2.734286  |
| ENSMUSG Zfp90     | 2.008032 | 2.591099 | 1.965762 | 2.744557 | 2.892458 | 2.38051   |
| ENSMUSG Polr3k    | 7.155879 | 8.88121  | 8.664969 | 10.16079 | 9.480399 | 9.754685  |
| ENSMUSG Slc7a6    | 5.467502 | 5.58679  | 5.250232 | 6.16983  | 5.862493 | 5.806233  |
| ENSMUSG Zg16      | 0        | 0.235901 | 0        | 0.379927 | 0.238649 | 0.228495  |
| ENSMUSG Rd3       | 1.05033  | 1.020579 | 0.74556  | 0.867371 | 1.055684 | 0.941401  |
| ENSMUSG Dcaf7     | 24.26446 | 24.14701 | 22.70055 | 21.27348 | 20.93347 | 21.515581 |
| ENSMUSG 4933408B  | 0.361893 | 0.207945 | 0.216928 | 0.177184 | 0.228109 | 0.178806  |
| ENSMUSG Med30     | 11.64525 | 7.713624 | 9.132954 | 9.642516 | 9.779008 | 9.860457  |
| ENSMUSG Urgcp     | 11.21488 | 10.24188 | 10.77246 | 8.756487 | 8.753687 | 8.787367  |
| ENSMUSG Pheta2    | 0.604575 | 0.636296 | 0.879145 | 0.814946 | 0.73616  | 0.832361  |
| ENSMUSG Orai1     | 18.72021 | 14.26295 | 16.52862 | 12.93297 | 14.07342 | 14.027881 |
| ENSMUSG Cyp2g1    | 0        | 0.117522 | 0.055956 | 0        | 0        | 0         |
| Mus_musc Mus_musc | 0.204677 | 0.277251 | 0        | 0.170593 | 0.12793  | 0         |
| Mus_musc Mus_musc | 0.329055 | 0.220148 | 0        | 0.096289 | 0.172068 | 0         |
| Mus_musc Mus_musc | 0.162299 | 0.221082 | 0.327927 | 0.271268 | 0.096344 | 0         |
| ENSMUSG Klrb1a    | 0.847095 | 0.646565 | 2.425463 | 2.616799 | 2.429432 | 2.781025  |
| ENSMUSG Clec2h    | 0        | 0        | 0        | 0.024169 | 0.056353 | 0         |
| ENSMUSG Clec2i    | 1.584214 | 0.603367 | 1.349664 | 1.696407 | 0.993233 | 2.29782   |
| ENSMUSG Ceacam12  | 0        | 0        | 0        | 0        | 0        | 0         |
| ENSMUSG Ceacam11  | 0        | 0        | 0        | 0        | 0        | 0         |
| ENSMUSG Rsph3a    | 11.81963 | 13.39647 | 10.3995  | 15.10111 | 15.56691 | 13.34709  |
| Mus_musc Mus_musc | 0.19927  | 0.708282 | 0.183195 | 0.461536 | 0.245427 | 0.345536  |
| ENSMUSG Nmi       | 15.93113 | 16.7804  | 21.51456 | 20.23577 | 16.26775 | 17.087242 |
| ENSMUSG Abca2     | 10.56312 | 9.63071  | 9.576246 | 9.299943 | 9.810888 | 10.416609 |
| ENSMUSG Lcn12     | 0        | 0        | 0        | 0        | 0        | 0         |
| ENSMUSG Traf2     | 10.49496 | 10.17884 | 10.1932  | 11.17915 | 11.60796 | 11.599879 |
| ENSMUSG Mamdc4    | 0.238974 | 0.411182 | 0.49199  | 0.294846 | 0.257345 | 0.241104  |
| ENSMUSG Ccdc183   | 0.085429 | 0.077828 | 0.089529 | 0.137877 | 0.014445 | 0.117219  |
| ENSMUSG Klf19     | 18.54074 | 20.2943  | 16.84379 | 16.92873 | 17.18197 | 18.99464  |
| ENSMUSG Zfp513    | 10.00882 | 9.043366 | 10.98497 | 9.357248 | 9.019938 | 9.589525  |
| ENSMUSG Gm4737    | 7.0233   | 9.770364 | 7.655802 | 8.744207 | 11.53947 | 11.7547   |
| ENSMUSG Tnp2      | 0        | 0        | 0        | 0        | 0        | 0         |
| ENSMUSG Disc1     | 0.716975 | 0.567572 | 0.527549 | 0.614647 | 0.489326 | 0.529123  |
| ENSMUSG Olfr731   | 0        | 0        | 0        | 0        | 0        | 0         |
| ENSMUSG Acod1     | 0.072618 | 0.049299 | 0.661382 | 0.445224 | 1.114745 | 0.574678  |
| ENSMUSG Nphp4     | 0.545654 | 0.546912 | 0.368353 | 0.610649 | 0.8411   | 0.961821  |

|                   |          |          |          |          |          |           |
|-------------------|----------|----------|----------|----------|----------|-----------|
| ENSMUSG Ccser1    | 4.346806 | 4.284695 | 3.686865 | 2.45048  | 3.628873 | 3.342256  |
| ENSMUSG Grin3a    | 0.055649 | 0.058399 | 0.048306 | 0.065021 | 0.105521 | 0.062932  |
| ENSMUSG Usp9x     | 21.64425 | 23.83477 | 17.16721 | 20.53113 | 21.06928 | 20.442663 |
| ENSMUSG Selenbp2  | 63.38729 | 74.69773 | 63.01464 | 31.59004 | 39.41186 | 32.809163 |
| ENSMUSG Cask      | 5.949478 | 6.475622 | 5.541101 | 5.583962 | 5.494737 | 5.586893  |
| ENSMUSG Swap70    | 27.31831 | 26.57316 | 23.57834 | 23.39278 | 21.98203 | 22.761753 |
| ENSMUSG Wee1      | 9.817149 | 10.33774 | 7.665151 | 6.16742  | 6.788961 | 6.694596  |
| ENSMUSG Gm5773    | 0        | 0        | 0        | 0        | 0        | 0         |
| ENSMUSG Rcc1      | 4.258036 | 3.910928 | 4.221075 | 4.958915 | 4.306404 | 5.46586   |
| ENSMUSG Inpp5b    | 30.42242 | 30.53957 | 28.65411 | 26.24091 | 25.91776 | 24.682394 |
| ENSMUSG Sesn2     | 7.411388 | 7.597456 | 7.050423 | 5.464833 | 6.910161 | 6.254329  |
| ENSMUSG Mtf1      | 4.676344 | 5.104763 | 4.707919 | 3.777638 | 4.357598 | 4.206139  |
| ENSMUSG Gpatch8   | 8.768798 | 9.625356 | 8.854445 | 7.964841 | 7.64008  | 7.850843  |
| ENSMUSG Rxy1t1    | 5.737528 | 5.758798 | 5.55092  | 5.45466  | 5.199516 | 8.982659  |
| ENSMUSG Prss55    | 0        | 0        | 0        | 0        | 0        | 0         |
| ENSMUSG Taf12     | 5.679469 | 6.26996  | 6.715847 | 5.74271  | 6.431102 | 6.210578  |
| ENSMUSG Trnau1ap  | 17.11644 | 15.09057 | 15.04038 | 14.90783 | 14.02007 | 16.88795  |
| ENSMUSG Gm10491   | 0        | 0        | 0        | 0        | 0        | 0         |
| ENSMUSG Gm10490   | 0        | 0        | 0        | 0.097642 | 0        | 0         |
| ENSMUSG Nudt10    | 0.261443 | 0.608978 | 0.451369 | 0.428227 | 0.51017  | 0.659854  |
| ENSMUSG Cdhr2     | 0        | 0        | 0        | 0.01003  | 0        | 0.013382  |
| ENSMUSG Nudt11    | 0.442951 | 0.512789 | 0.431438 | 0.916451 | 0.829508 | 0.884955  |
| ENSMUSG AU022751  | 0        | 0        | 0        | 0        | 0        | 0         |
| ENSMUSG Kntc1     | 0.136439 | 0.182075 | 0.227885 | 0.480201 | 0.617183 | 0.667831  |
| ENSMUSG Sdad1     | 4.075525 | 3.869725 | 4.302824 | 4.503257 | 4.431502 | 4.831507  |
| ENSMUSG Slc15a4   | 12.51899 | 13.38281 | 13.36082 | 12.60248 | 12.41298 | 14.512687 |
| ENSMUSG Cxcl9     | 0.314167 | 0.359628 | 1.360615 | 4.054715 | 2.637936 | 3.641647  |
| ENSMUSG Ppef2     | 0.026656 | 0.372262 | 0.32684  | 0.537104 | 0.189992 | 0.381236  |
| ENSMUSG 1700025G1 | 2.022798 | 2.447962 | 2.249286 | 1.989899 | 1.993755 | 1.811515  |
| ENSMUSG Naaa      | 26.95229 | 28.41084 | 30.72468 | 43.25629 | 40.46872 | 41.987949 |
| ENSMUSG Ajm1      | 0.036904 | 0.031653 | 0.016229 | 0.288865 | 0.384527 | 0.257623  |
| ENSMUSG Itgb3bp   | 1.119142 | 1.076755 | 0.758346 | 0.787414 | 0.890182 | 1.04463   |
| ENSMUSG Myo3a     | 0        | 0        | 0        | 0        | 0        | 0         |
| ENSMUSG Vat1      | 96.9296  | 77.79343 | 93.12348 | 81.40307 | 94.93455 | 104.80645 |
| ENSMUSG Slc30a5   | 18.53902 | 17.50341 | 18.57581 | 19.57923 | 21.10568 | 21.344402 |
| ENSMUSG Otoa      | 0        | 0.011779 | 0        | 0        | 0.036962 | 0         |
| ENSMUSG Htr2a     | 0.195699 | 0.155135 | 0.157184 | 0.250781 | 0.339849 | 0.349119  |
| ENSMUSG Eef2      | 665.574  | 668.6395 | 654.7125 | 706.9168 | 703.6886 | 751.73352 |
| ENSMUSG Ckmt2     | 0.423893 | 7.574602 | 0.617367 | 2.584011 | 1.83363  | 0.765129  |
| ENSMUSG Zcchc9    | 10.64359 | 10.25203 | 11.11278 | 11.32301 | 9.937679 | 11.790715 |
| ENSMUSG Foxn2     | 11.97515 | 11.07938 | 10.07509 | 9.151444 | 10.04125 | 9.10159   |
| ENSMUSG Cd180     | 2.038669 | 1.515049 | 3.060497 | 4.130547 | 2.995994 | 4.253009  |
| ENSMUSG Cdhr4     | 3.221132 | 5.086591 | 2.366274 | 10.78965 | 10.22363 | 9.576342  |
| ENSMUSG Ip6k1     | 37.48899 | 39.56203 | 38.19968 | 32.57344 | 31.70091 | 31.693976 |
| ENSMUSG Uba7      | 13.97684 | 11.89995 | 25.41965 | 16.01928 | 10.70968 | 13.014329 |
| ENSMUSG Mst1      | 0.307043 | 0.574832 | 0.307195 | 0.812055 | 0.707322 | 0.705083  |
| ENSMUSG 7420426K1 | 0        | 0        | 0        | 0        | 0        | 0         |
| ENSMUSG Amigo3    | 1.108298 | 0.941511 | 1.479769 | 1.217018 | 0.917898 | 1.462843  |
| ENSMUSG Ntf5      | 2.310072 | 2.292427 | 3.099009 | 2.838085 | 2.665548 | 2.707531  |
| ENSMUSG Ip6k2     | 26.47305 | 33.91428 | 28.94769 | 23.43866 | 23.9524  | 21.128856 |
| ENSMUSG Nckipsd   | 7.293495 | 5.659659 | 5.892458 | 4.796306 | 5.198864 | 5.961874  |
| ENSMUSG Rpl13a    | 511.4794 | 536.0042 | 542.9403 | 652.0567 | 563.7656 | 604.62884 |
| ENSMUSG Lrfn4     | 2.721565 | 3.189098 | 3.33431  | 3.401262 | 3.008395 | 3.66121   |
| ENSMUSG Wdr41     | 7.619342 | 8.581381 | 7.925038 | 9.613164 | 9.751984 | 8.943195  |
| ENSMUSG Acacb     | 9.153709 | 10.42373 | 7.475479 | 7.230241 | 6.13369  | 6.906152  |
| ENSMUSG Ttc32     | 5.097778 | 5.577134 | 5.710355 | 7.066176 | 5.589447 | 4.443823  |
| ENSMUSG Ltb       | 18.91903 | 11.47875 | 25.16591 | 36.77047 | 28.48848 | 37.315269 |
| ENSMUSG Apom      | 0.183577 | 0.16911  | 0.258991 | 0.086304 | 0        | 0.328735  |
| ENSMUSG Bag6      | 53.46821 | 48.24596 | 50.04394 | 43.82486 | 42.20648 | 45.350596 |
| ENSMUSG Prrc2a    | 57.34427 | 56.79729 | 56.08367 | 50.38797 | 52.41059 | 52.970132 |
| ENSMUSG Lims2     | 75.74435 | 67.25195 | 70.68167 | 32.84369 | 31.67448 | 28.093862 |
| ENSMUSG Aif1      | 1.371821 | 1.638771 | 4.540559 | 6.418528 | 5.199781 | 5.334246  |
| ENSMUSG Neurog3   | 0        | 0        | 0        | 0        | 0        | 0         |
| ENSMUSG Mab2113   | 0.029859 | 0.078065 | 0.053321 | 0.465559 | 0.576605 | 0.482363  |

|                   |          |          |          |          |          |           |
|-------------------|----------|----------|----------|----------|----------|-----------|
| ENSMUSG Gpr4      | 5.752378 | 4.875895 | 6.778431 | 3.433347 | 3.662396 | 3.364307  |
| ENSMUSG Olfr1249  | 0        | 0        | 0        | 0        | 0        | 0         |
| ENSMUSG H60b      | 0        | 0.338766 | 0.26232  | 0.436679 | 0.39119  | 0.799846  |
| ENSMUSG Aldh3b2   | 0.095927 | 0.28296  | 0        | 0.051774 | 0.141611 | 0.149603  |
| ENSMUSG Btnl4     | 0        | 0        | 0        | 0        | 0.041709 | 0         |
| ENSMUSG Smc3      | 17.71657 | 18.42529 | 17.7889  | 15.57235 | 15.39506 | 14.729972 |
| ENSMUSG Pdcd4     | 17.00694 | 14.6565  | 15.38429 | 20.016   | 15.23892 | 15.665573 |
| ENSMUSG Shoc2     | 18.64284 | 18.7709  | 16.91223 | 15.25842 | 16.149   | 15.058724 |
| ENSMUSG Spindoc   | 4.951915 | 4.731931 | 5.638405 | 4.069089 | 4.482082 | 4.886462  |
| ENSMUSG Lgals12   | 0.586388 | 1.165333 | 0.494973 | 1.178343 | 0.927504 | 1.16228   |
| ENSMUSG Hrasls5   | 0        | 0        | 0        | 0.120782 | 0        | 0         |
| ENSMUSG Gpam      | 26.16009 | 29.84691 | 24.85742 | 30.29783 | 31.56919 | 35.605881 |
| ENSMUSG Tectb     | 0        | 0.059119 | 0        | 0.052364 | 0.148048 | 0.037986  |
| ENSMUSG Npas1     | 0.127423 | 0.342639 | 0.534197 | 0.227361 | 0.354546 | 0.285749  |
| ENSMUSG Taco1     | 7.338324 | 7.355018 | 6.881858 | 7.943089 | 7.403101 | 6.273852  |
| ENSMUSG Grik3     | 0.672244 | 0.847661 | 0.714397 | 0.364594 | 0.470216 | 0.283412  |
| ENSMUSG Gria3     | 3.310391 | 4.142067 | 3.865944 | 2.158144 | 2.83643  | 2.122618  |
| Mus_musc Mus_musc | 0        | 0        | 0.019525 | 0.430522 | 0        | 0         |
| Mus_musc Mus_musc | 0        | 0.287266 | 0.190867 | 0.254694 | 0        | 0.14057   |
| Mus_musc Mus_musc | 0.92472  | 0.495933 | 1.09907  | 1.145848 | 0.918989 | 1.14974   |
| Mus_musc Mus_musc | 1.146177 | 1.170409 | 1.069924 | 0.59306  | 0.827279 | 1.018821  |
| ENSMUSG Clec4a3   | 11.09588 | 9.237665 | 16.20886 | 39.78153 | 39.76508 | 42.310096 |
| ENSMUSG Apon      | 0.078032 | 0.026498 | 0.086837 | 0.096919 | 0.019556 | 0.028993  |
| ENSMUSG Lysmd4    | 3.896607 | 4.649035 | 3.600042 | 3.252534 | 3.720666 | 3.954324  |
| ENSMUSG Naa50     | 20.53047 | 20.52031 | 19.91967 | 22.13132 | 21.73869 | 21.808946 |
| ENSMUSG Ctr9      | 12.53986 | 13.25533 | 12.00337 | 12.30798 | 11.69248 | 11.885538 |
| ENSMUSG Btaf1     | 10.84186 | 11.23447 | 9.871743 | 9.466247 | 9.436166 | 9.680274  |
| ENSMUSG Apoc1     | 12.82109 | 14.54511 | 10.15015 | 6.946899 | 8.57849  | 10.459524 |
| ENSMUSG Wdr7      | 4.99541  | 5.205892 | 4.141546 | 4.968338 | 5.44332  | 5.677997  |
| ENSMUSG Plppr2    | 2.031313 | 1.917523 | 2.444565 | 2.123135 | 1.72582  | 1.94501   |
| ENSMUSG Gstm2     | 134.6829 | 124.3571 | 107.4178 | 84.32966 | 76.07436 | 84.462357 |
| ENSMUSG Slc26a7   | 0        | 0        | 0        | 0        | 0        | 0.010698  |
| ENSMUSG Mrpl46    | 9.918078 | 11.6362  | 9.538636 | 10.94    | 10.31138 | 10.682153 |
| ENSMUSG Tmem126l  | 9.701557 | 9.458803 | 8.527088 | 10.26807 | 9.254123 | 9.916542  |
| ENSMUSG Vmn1r179  | 0        | 0        | 0        | 0        | 0        | 0         |
| ENSMUSG Gpr6      | 0        | 0        | 0        | 0        | 0        | 0         |
| ENSMUSG Ccdc83    | 0.075213 | 0.022869 | 0        | 0        | 0.069976 | 0.104151  |
| ENSMUSG Ifi211    | 1.362678 | 1.644954 | 3.309447 | 2.933776 | 2.56027  | 2.52643   |
| ENSMUSG Ifi202b   | 2.171393 | 2.454308 | 4.54485  | 6.484026 | 5.036733 | 5.316439  |
| ENSMUSG Spta1     | 0.801393 | 0.719559 | 0.904439 | 0.310542 | 0.285524 | 0.286139  |
| ENSMUSG Mptx1     | 0        | 0        | 0        | 0        | 0        | 0         |
| ENSMUSG Gfral     | 0        | 0        | 0        | 0        | 0        | 0         |
| ENSMUSG Tas2r120  | 0        | 0        | 0        | 0        | 0        | 0         |
| ENSMUSG Gm8453    | 0        | 0        | 0        | 0        | 0        | 0         |
| ENSMUSG Olfr1512  | 0        | 0        | 0        | 0        | 0        | 0         |
| Mus_musc Mus_musc | 0.215097 | 0.400269 | 0.830091 | 0.201964 | 0.738566 | 0.453768  |
| ENSMUSG Gm10142   | 0        | 0        | 0        | 0        | 0        | 0         |
| ENSMUSG Gm21616   | 0        | 0        | 0        | 0        | 0        | 0         |
| ENSMUSG Gm21312   | 0        | 0        | 0        | 0        | 0        | 0         |
| ENSMUSG Vmn2r20   | 0        | 0        | 0        | 0        | 0        | 0         |
| Mus_musc Mus_musc | 20.88003 | 23.14575 | 29.13926 | 35.42647 | 26.47558 | 29.567222 |
| ENSMUSG Olfr1151  | 0        | 0        | 0        | 0        | 0        | 0         |
| ENSMUSG Gm3238    | 0        | 0        | 0        | 0        | 0        | 0         |
| ENSMUSG Aven      | 2.002538 | 1.929779 | 1.689927 | 1.982887 | 2.087282 | 1.877907  |
| ENSMUSG Spata2    | 8.024528 | 8.602369 | 8.98502  | 7.704299 | 8.509949 | 8.748384  |
| ENSMUSG Btbd35f7  | 0        | 0        | 0        | 0        | 0        | 0         |
| ENSMUSG Zfp445    | 20.73625 | 22.89387 | 17.7539  | 18.71667 | 19.77957 | 20.172036 |
| ENSMUSG Nipa1     | 13.93979 | 13.46694 | 12.38844 | 8.064963 | 7.944367 | 9.28853   |
| ENSMUSG Ankrd33   | 0        | 0.111016 | 0.25433  | 0.073758 | 0.041349 | 0.057873  |
| Mus_musc Mus_musc | 0        | 0        | 0        | 0        | 0.646015 | 0         |
| Mus_musc Mus_musc | 0        | 0        | 0        | 0        | 0        | 0         |
| ENSMUSG Olfr792   | 0        | 0        | 0        | 0        | 0        | 0         |
| Mus_musc Mus_musc | 0        | 0        | 0        | 0.174016 | 0        | 0         |
| Mus_musc Mus_musc | 2.195778 | 3.00177  | 2.810894 | 2.743251 | 2.304229 | 2.497307  |

|                   |          |          |          |          |          |           |
|-------------------|----------|----------|----------|----------|----------|-----------|
| Mus_musc Mus_musc | 1.218358 | 0.756466 | 0.66845  | 0.940478 | 0.271977 | 0.900838  |
| Mus_musc Mus_musc | 0        | 0        | 0        | 0.197038 | 0        | 0.087435  |
| Mus_musc Mus_musc | 0        | 0        | 0        | 0        | 0        | 0         |
| Mus_musc Mus_musc | 0        | 0        | 0        | 0.310322 | 0        | 0         |
| Mus_musc Mus_musc | 0        | 0.164159 | 0.257246 | 0        | 0        | 0         |
| Mus_musc Mus_musc | 0        | 0.05414  | 0.418597 | 0        | 0.631927 | 0.394972  |
| Mus_musc Mus_musc | 0.041722 | 0.065128 | 0.809161 | 0.621621 | 0.921466 | 0.662029  |
| Mus_musc Mus_musc | 0.235318 | 0.101206 | 0.241282 | 0.14929  | 0.217216 | 0.234812  |
| Mus_musc Mus_musc | 0.37086  | 0.268063 | 0.217126 | 0.57615  | 0.777262 | 0.501494  |
| ENSMUSG Vmn1r157  | 0        | 0        | 0        | 0        | 0        | 0         |
| ENSMUSG Lrrc8d    | 14.77081 | 11.79398 | 10.96891 | 12.18109 | 12.93119 | 13.946036 |
| ENSMUSG Igfals    | 0.077648 | 0.101756 | 0.082505 | 0.351479 | 0.307598 | 0.184186  |
| Mus_musc Mus_musc | 0.259966 | 0.34606  | 0.114318 | 0.224083 | 0.034221 | 0.110847  |
| Mus_musc Mus_musc | 0        | 0.197343 | 0.158258 | 0.255043 | 0.092372 | 0.599124  |
| Mus_musc Mus_musc | 0        | 0        | 0        | 0.264821 | 0        | 0         |
| Mus_musc Mus_musc | 0.513013 | 0.098657 | 0.108008 | 0.09903  | 0.170538 | 0         |
| Mus_musc Mus_musc | 0        | 0.137476 | 0.176999 | 0.11232  | 0.211302 | 0.162419  |
| Mus_musc Mus_musc | 0        | 0        | 0.249476 | 0.427653 | 0        | 0         |
| Mus_musc Mus_musc | 0        | 0.300594 | 0        | 0        | 0.092423 | 0.153359  |
| ENSMUSG Tcf23     | 0.49662  | 0.501899 | 0.674965 | 0.413901 | 0.24534  | 0.368909  |
| Mus_musc Mus_musc | 0.15022  | 0.183374 | 0.051342 | 0.089146 | 0.134371 | 0.316083  |
| ENSMUSG Slc5a6    | 2.75286  | 2.613109 | 2.482078 | 2.080981 | 1.992743 | 2.326955  |
| Mus_musc Mus_musc | 0.63985  | 0.547575 | 0.376631 | 0.377315 | 0.242326 | 0.284403  |
| Mus_musc Mus_musc | 0        | 0        | 0.168936 | 0        | 0        | 0         |
| ENSMUSG Nphs1     | 0        | 0        | 0        | 0        | 0        | 0         |
| Mus_musc Mus_musc | 0        | 0        | 0        | 0.174016 | 0        | 0         |
| Mus_musc Mus_musc | 0.137138 | 0.093786 | 0.382776 | 0.17317  | 0        | 0.051644  |
| Mus_musc Mus_musc | 0        | 0        | 0        | 0        | 0        | 0         |
| Mus_musc Mus_musc | 0        | 0        | 0.214349 | 0        | 0        | 0         |
| Mus_musc Mus_musc | 0.135866 | 0.540442 | 0.264127 | 0.106494 | 0.403765 | 0.333488  |
| Mus_musc Mus_musc | 0.214205 | 0.072917 | 0        | 0.076912 | 0        | 0         |
| ENSMUSG Hipk1     | 50.72671 | 60.71907 | 47.51259 | 45.20919 | 46.02386 | 50.024132 |
| ENSMUSG Tenm3     | 0.129278 | 0.312885 | 0.107817 | 0.223329 | 0.166874 | 0.172822  |
| ENSMUSG Gprc5b    | 7.221066 | 8.071347 | 6.358106 | 6.193549 | 5.871779 | 6.46112   |
| ENSMUSG Selenop   | 543.8249 | 544.7982 | 503.5385 | 496.6209 | 501.3472 | 459.02055 |
| ENSMUSG mt-Cytb   | 2349.507 | 2520.422 | 2235.242 | 2671.991 | 2664.421 | 2252.9731 |
| Mus_musc Mus_musc | 1.27958  | 1.335809 | 2.382244 | 2.517238 | 1.517199 | 1.683034  |
| Mus_musc Mus_musc | 0        | 0        | 0        | 0        | 0        | 0         |
| Mus_musc Mus_musc | 1.391742 | 1.242836 | 1.935769 | 1.944636 | 1.54625  | 2.047351  |
| Mus_musc Mus_musc | 0.940756 | 0.806642 | 1.052728 | 0.793541 | 0.62091  | 1.284985  |
| Mus_musc Mus_musc | 0        | 0        | 0.561751 | 0        | 0        | 0         |
| Mus_musc Mus_musc | 0.051934 | 0.087669 | 0.083496 | 0.228824 | 0.081869 | 0.616148  |
| ENSMUSG Gm3012    | 0        | 0        | 0        | 0        | 0        | 0         |
| ENSMUSG Rbm31y    | 0        | 0        | 0        | 0        | 0        | 0         |
| Mus_musc Mus_musc | 0        | 0        | 0.099826 | 0        | 0        | 0         |
| ENSMUSG Vmn2r120  | 0        | 0        | 0        | 0        | 0        | 0         |
| ENSMUSG Gm3594    | 0        | 0        | 0        | 0        | 0        | 0         |
| ENSMUSG Gm4567    | 0        | 0        | 0        | 0        | 0        | 0         |
| Mus_musc Mus_musc | 0.114091 | 0.379085 | 0        | 0        | 0        | 0.221179  |
| ENSMUSG Dlx3      | 0        | 0        | 0.02268  | 0        | 0        | 0         |
| ENSMUSG Foxm1     | 0.94979  | 1.198842 | 1.255078 | 1.551276 | 2.25505  | 2.582823  |
| ENSMUSG Itfg2     | 5.692776 | 6.560946 | 6.300143 | 5.402366 | 5.099013 | 5.505346  |
| ENSMUSG Gm17949   | 0        | 0.083118 | 0        | 0        | 0        | 0         |
| ENSMUSG Tssk2     | 0.119213 | 0        | 0.065481 | 0.008149 | 0.022866 | 0.086254  |
| ENSMUSG Olfr891   | 0        | 0        | 0        | 0        | 0        | 0         |
| ENSMUSG Gm39566   | 0        | 0        | 0        | 0        | 0        | 0         |
| Mus_musc Mus_musc | 0        | 0.244105 | 0        | 0        | 0        | 0         |
| Mus_musc Mus_musc | 1.223513 | 1.004033 | 0.454653 | 0.387872 | 0        | 0.566246  |
| Mus_musc Mus_musc | 0.105158 | 0.542576 | 0.48232  | 0.596534 | 0.204795 | 0.399617  |
| Mus_musc Mus_musc | 0.265367 | 0.357074 | 0.283649 | 0.115638 | 0        | 0         |
| Mus_musc Mus_musc | 0        | 0        | 0        | 0        | 0        | 0.071569  |
| Mus_musc Mus_musc | 1.264863 | 0.986694 | 1.206927 | 0.872042 | 0.849798 | 0.870861  |
| Mus_musc Mus_musc | 0.908049 | 0.743215 | 0.444759 | 0.173493 | 0.454701 | 0.612692  |
| Mus_musc Mus_musc | 0.172073 | 0        | 0        | 0.155397 | 0        | 0         |

|                   |          |          |          |          |          |           |
|-------------------|----------|----------|----------|----------|----------|-----------|
| Mus_musc Mus_musc | 0        | 0.028466 | 0.361818 | 0        | 0        | 0         |
| ENSMUSG Nmur2     | 0        | 0        | 0        | 0        | 0        | 0         |
| ENSMUSG Vmn2r125  | 0        | 0        | 0        | 0        | 0        | 0         |
| ENSMUSG Scgb1b12  | 0        | 0        | 0        | 0        | 0        | 0         |
| ENSMUSG Gm10031   | 6.102835 | 9.724101 | 6.549953 | 8.341362 | 6.306372 | 4.381939  |
| ENSMUSG Chst2     | 5.753305 | 4.786578 | 5.811906 | 3.573363 | 3.344081 | 3.052596  |
| ENSMUSG Gm29110   | 0        | 0        | 0        | 0        | 0        | 0         |
| ENSMUSG Suz12     | 14.41513 | 14.1059  | 14.55539 | 14.31607 | 14.43908 | 13.264084 |
| ENSMUSG Map2k4    | 15.11103 | 14.82434 | 14.23524 | 14.64878 | 15.22256 | 14.275155 |
| Mus_musc Mus_musc | 0.318106 | 0.206737 | 0.470122 | 0.675951 | 0.735326 | 0.427403  |
| Mus_musc Mus_musc | 0.197791 | 0.120537 | 0.043842 | 0.061718 | 0.428456 | 0.173511  |
| Mus_musc Mus_musc | 0        | 0.113504 | 0.579723 | 0        | 0.090793 | 0.630376  |
| ENSMUSG Gm28308   | 0.371239 | 0        | 0.45253  | 0        | 0.26475  | 0         |
| ENSMUSG Gm9508    | 0        | 0        | 0        | 0        | 0        | 0         |
| ENSMUSG Btbd35f15 | 0        | 0        | 0        | 0        | 0        | 0         |
| ENSMUSG Ifitm7    | 0        | 0        | 0        | 0        | 0        | 0         |
| ENSMUSG Gm12845   | 0        | 0        | 0        | 0.029544 | 0        | 0         |
| Mus_musc Mus_musc | 0        | 0        | 0        | 0        | 0        | 0         |
| Mus_musc Mus_musc | 0        | 0        | 0.496109 | 0        | 0        | 0         |
| Mus_musc Mus_musc | 0.288743 | 0.262897 | 0        | 0.326113 | 0        | 0         |
| Mus_musc Mus_musc | 0.50645  | 0        | 0        | 0        | 0        | 0         |
| Mus_musc Mus_musc | 0        | 0        | 0        | 0.336474 | 0.073463 | 0.281697  |
| Mus_musc Mus_musc | 0.142999 | 0        | 0        | 0        | 0        | 0         |
| ENSMUSG Nyap2     | 0        | 0        | 0        | 0        | 0        | 0.007146  |
| ENSMUSG Kbtbd13   | 0.48683  | 0.496347 | 0.394146 | 0.238078 | 0.370995 | 0.207143  |
| ENSMUSG Thoc6     | 5.865723 | 3.857091 | 5.000485 | 6.791369 | 5.947608 | 7.593012  |
| ENSMUSG Slc7a1    | 3.722912 | 3.201138 | 2.950719 | 3.480265 | 3.200542 | 3.844231  |
| ENSMUSG Ndufa9    | 31.91228 | 31.36314 | 31.68489 | 31.70026 | 30.23934 | 29.91563  |
| ENSMUSG Fap       | 0.155702 | 0.474258 | 0.28156  | 0.481819 | 0.39164  | 0.111208  |
| ENSMUSG Gcg       | 0        | 0        | 0        | 0.02767  | 0        | 0         |
| ENSMUSG Ms4a15    | 0.201975 | 0.087069 | 0.353219 | 0.049794 | 0.24748  | 0.142794  |
| ENSMUSG 5530400C; | 0        | 0        | 0        | 0        | 0        | 0         |
| ENSMUSG Pnp       | 21.51965 | 21.98083 | 24.74727 | 22.48147 | 22.35659 | 24.277185 |
| ENSMUSG Aph1b     | 4.927773 | 5.322476 | 5.009155 | 3.91674  | 4.099531 | 3.812686  |
| ENSMUSG Olfr586   | 0        | 0        | 0        | 0        | 0        | 0         |
| ENSMUSG Olfr575   | 0        | 0        | 0        | 0        | 0        | 0         |
| ENSMUSG Naa16     | 1.544871 | 1.863325 | 1.961036 | 1.353673 | 1.532657 | 1.344332  |
| ENSMUSG Diaph3    | 0.26752  | 0.383988 | 0.292597 | 0.904717 | 1.155317 | 1.298007  |
| ENSMUSG Mtrf1     | 2.005163 | 1.944434 | 1.957791 | 2.014631 | 1.774926 | 2.4021    |
| ENSMUSG Wbp4      | 14.13806 | 14.40913 | 13.72858 | 10.72485 | 10.77062 | 9.925543  |
| ENSMUSG Sugt1     | 8.397516 | 7.89571  | 7.993661 | 7.58092  | 6.986896 | 6.9286    |
| ENSMUSG Olfr639   | 0        | 0        | 0        | 0        | 0        | 0         |
| ENSMUSG Olfm4     | 0.324373 | 0.264326 | 0.631294 | 0.918943 | 1.664368 | 1.385638  |
| ENSMUSG B4galnt4  | 0.129919 | 0.082753 | 0.137296 | 0.546076 | 0.317892 | 0.568926  |
| ENSMUSG Tex13c2   | 0        | 0        | 0.027634 | 0        | 0.090292 | 0         |
| Mus_musc Mus_musc | 0.242151 | 0        | 0        | 0        | 0        | 0         |
| Mus_musc Mus_musc | 0        | 0        | 0        | 0        | 0.186692 | 0         |
| Mus_musc Mus_musc | 0.297522 | 0        | 0.225447 | 0        | 0        | 0         |
| ENSMUSG Vmn1r56   | 0        | 0        | 0        | 0        | 0        | 0         |
| ENSMUSG Olfr311   | 0        | 0        | 0        | 0        | 0        | 0         |
| ENSMUSG Gm21977   | 0        | 0        | 0        | 0        | 0        | 0         |
| ENSMUSG Tph1      | 0        | 0.024523 | 0        | 0.016021 | 0.079555 | 0.03452   |
| ENSMUSG Samt1     | 0        | 0        | 0        | 0        | 0        | 0         |
| ENSMUSG Orc3      | 11.13831 | 10.4676  | 10.7796  | 10.14937 | 11.39054 | 11.034824 |
| ENSMUSG Gm9780    | 8.638084 | 7.981851 | 8.391868 | 6.720558 | 6.426453 | 8.968317  |
| ENSMUSG Ndufb10   | 51.47471 | 55.95545 | 62.39    | 49.94065 | 57.41052 | 50.337791 |
| ENSMUSG Vmn2r17   | 0        | 0        | 0        | 0        | 0        | 0         |
| ENSMUSG 1810009J0 | 0        | 0        | 0        | 0        | 0        | 0         |
| Mus_musc Mus_musc | 5.503879 | 5.554321 | 6.118219 | 3.165262 | 3.486866 | 2.788206  |
| Mus_musc Mus_musc | 0.365062 | 0.481221 | 0.489464 | 0.442046 | 0.606177 | 0.228733  |
| ENSMUSG Dcst2     | 0.01868  | 0.051872 | 0.026547 | 0        | 0.061768 | 0.04248   |
| ENSMUSG Fuz       | 10.70647 | 7.90248  | 6.873281 | 9.456548 | 7.404125 | 8.724137  |
| ENSMUSG A330070K  | 0        | 0        | 0        | 0        | 0        | 0         |
| ENSMUSG Olfr796   | 0        | 0        | 0        | 0        | 0        | 0         |

|                   |          |          |          |          |          |           |
|-------------------|----------|----------|----------|----------|----------|-----------|
| ENSMUSG Btla      | 2.953834 | 2.185716 | 2.508259 | 5.066098 | 3.436736 | 3.917265  |
| ENSMUSG 1810065E  | 0        | 0.042827 | 0        | 0.417939 | 0.160886 | 0.077175  |
| ENSMUSG Cyp2c67   | 0        | 0        | 0        | 0        | 0        | 0         |
| ENSMUSG Gapdh     | 3.594779 | 4.108433 | 3.862043 | 5.040447 | 5.824681 | 4.639627  |
| ENSMUSG Bloc1s3   | 2.826311 | 2.417253 | 1.84399  | 2.675034 | 3.733115 | 3.005344  |
| ENSMUSG Dock9     | 57.60802 | 51.27713 | 49.46911 | 32.54082 | 33.84344 | 32.844866 |
| ENSMUSG Mob3c     | 8.885333 | 9.704345 | 10.71248 | 8.369971 | 8.209931 | 8.335385  |
| ENSMUSG Mknk1     | 18.37995 | 19.64207 | 21.26592 | 21.68201 | 21.22035 | 19.490227 |
| ENSMUSG Dmbx1     | 0        | 0        | 0        | 0        | 0        | 0.019057  |
| ENSMUSG Nsun4     | 9.888811 | 8.52875  | 9.051619 | 6.705096 | 7.207412 | 8.22281   |
| ENSMUSG Lrrc41    | 14.83798 | 14.92498 | 13.78865 | 13.0882  | 14.07826 | 13.241653 |
| ENSMUSG Rad54l    | 0.263036 | 0.358375 | 0.192612 | 0.61059  | 0.754613 | 0.967958  |
| ENSMUSG Slc15a1   | 0.773815 | 0.826674 | 1.247751 | 0.689792 | 0.742881 | 0.756427  |
| ENSMUSG Pomgnt1   | 18.95849 | 19.98257 | 17.62652 | 16.81349 | 17.03235 | 17.171278 |
| ENSMUSG Naif1     | 2.068943 | 1.917359 | 2.074415 | 2.158068 | 1.923711 | 1.983416  |
| ENSMUSG Adgrl4    | 73.28136 | 68.51949 | 69.73895 | 43.46833 | 47.19725 | 40.079953 |
| ENSMUSG Akap7     | 11.40884 | 11.12728 | 10.26837 | 11.03045 | 8.948003 | 9.921801  |
| ENSMUSG Cmc1      | 7.304193 | 7.239995 | 5.188826 | 7.078022 | 6.231116 | 5.919695  |
| ENSMUSG Dap       | 34.12733 | 31.46678 | 32.16876 | 44.35493 | 44.7349  | 50.592042 |
| ENSMUSG Mpc1      | 40.35516 | 33.42758 | 34.12986 | 34.84666 | 30.49079 | 31.393354 |
| Mus_musc Mus_musc | 0        | 0.154309 | 0        | 0.187735 | 0        | 0         |
| ENSMUSG Pde10a    | 0.235784 | 0.249628 | 0.254263 | 0.18806  | 0.238238 | 0.187719  |
| ENSMUSG Krt86     | 0        | 0.048502 | 0.074786 | 0        | 0.028532 | 0         |
| ENSMUSG Krt81     | 0        | 0        | 0        | 0        | 0        | 0         |
| ENSMUSG Kik11     | 0.684076 | 1.152154 | 0.223907 | 0.738524 | 0.867379 | 0.654893  |
| ENSMUSG Klri1     | 0.548163 | 0.277499 | 2.813049 | 0.750886 | 0.081539 | 0.312765  |
| ENSMUSG Krt83     | 0        | 0        | 0.039229 | 0.259432 | 0.209112 | 0.164793  |
| ENSMUSG Afap1l2   | 4.339581 | 4.470084 | 5.229199 | 3.591503 | 3.571224 | 4.273724  |
| ENSMUSG Vwa2      | 0        | 0.041655 | 0        | 0.103017 | 0        | 0.060592  |
| ENSMUSG Tdrd1     | 0        | 0.008925 | 0        | 0.00775  | 0        | 0         |
| ENSMUSG Trub1     | 1.767678 | 1.452786 | 1.520676 | 1.449115 | 1.250456 | 1.52536   |
| ENSMUSG Ablim1    | 43.77246 | 38.52098 | 34.11939 | 31.89953 | 32.44093 | 36.446024 |
| ENSMUSG Gfra1     | 3.376762 | 4.42075  | 2.276471 | 1.269499 | 1.472436 | 1.330056  |
| ENSMUSG Rasgrf2   | 14.35687 | 12.21248 | 10.02776 | 8.190839 | 8.714618 | 8.373588  |
| ENSMUSG Erbin     | 42.56786 | 42.82336 | 36.02769 | 34.68666 | 36.69347 | 32.323111 |
| ENSMUSG Rab3c     | 2.435731 | 2.459312 | 2.151571 | 1.342809 | 1.836346 | 1.907291  |
| ENSMUSG PIk2      | 42.07982 | 31.22492 | 29.01886 | 22.82023 | 19.51879 | 22.765684 |
| ENSMUSG Thbs4     | 0.026047 | 0.031653 | 0.015848 | 0.670544 | 0.925172 | 0.520018  |
| ENSMUSG Serinc5   | 21.57391 | 20.0409  | 16.90122 | 15.55663 | 16.80468 | 16.838814 |
| ENSMUSG Mtx3      | 2.797445 | 2.683128 | 2.969173 | 2.236139 | 1.841071 | 2.1428    |
| ENSMUSG Zfyve16   | 5.59285  | 5.55339  | 5.001774 | 4.918998 | 4.909052 | 4.879019  |
| ENSMUSG Dhfr      | 0.936954 | 0.888664 | 0.802816 | 0.99408  | 1.355778 | 1.112192  |
| ENSMUSG Gm5800    | 0        | 0        | 0        | 0        | 0        | 0         |
| ENSMUSG Ins1      | 0        | 0        | 0        | 0        | 0        | 0         |
| ENSMUSG Mlc1      | 20.87509 | 22.07906 | 19.63446 | 16.37674 | 14.92389 | 19.304887 |
| ENSMUSG Wnt9b     | 0.087398 | 0.131155 | 0.13046  | 0.087624 | 0.098635 | 0.172735  |
| ENSMUSG Appbp2    | 11.15034 | 10.92498 | 9.78259  | 8.912034 | 9.658621 | 9.004679  |
| ENSMUSG Ubxn8     | 6.413091 | 6.202238 | 6.172788 | 6.082354 | 6.146287 | 6.057583  |
| ENSMUSG Wdr46     | 8.958544 | 8.74094  | 8.224261 | 8.556433 | 8.135733 | 9.018296  |
| ENSMUSG Mep1b     | 0        | 0        | 0        | 0        | 0.041406 | 0         |
| ENSMUSG Slc45a1   | 0        | 0        | 0        | 0        | 0        | 0         |
| ENSMUSG Arhgap29  | 60.04417 | 59.69495 | 60.05492 | 43.29823 | 40.78987 | 41.881081 |
| ENSMUSG Olig2     | 0        | 0        | 0        | 0        | 0        | 0         |
| ENSMUSG Nhsl1     | 2.462688 | 2.792258 | 2.44502  | 2.202399 | 2.398139 | 2.391642  |
| ENSMUSG Zfp335    | 6.322422 | 6.422497 | 6.620045 | 5.657918 | 6.025889 | 7.023539  |
| ENSMUSG Supv3l1   | 5.292683 | 4.47482  | 4.609383 | 4.403034 | 4.020292 | 4.91516   |
| ENSMUSG Vps26a    | 29.54602 | 28.37459 | 27.01799 | 26.76238 | 28.69027 | 24.635488 |
| ENSMUSG Ruffy2    | 5.765243 | 5.106201 | 4.705233 | 4.837121 | 4.479001 | 4.10122   |
| ENSMUSG Unc5d     | 0.228003 | 0.243146 | 0.129579 | 0.09521  | 0.058458 | 0.044928  |
| ENSMUSG Ddx21     | 19.21568 | 18.60268 | 18.59741 | 17.76061 | 17.97025 | 18.51932  |
| ENSMUSG Ccar1     | 18.37944 | 18.13567 | 17.37814 | 16.07152 | 17.30467 | 16.942841 |
| ENSMUSG Srgn      | 80.44806 | 111.93   | 139.856  | 161.0972 | 166.3703 | 140.51122 |
| ENSMUSG Ddx50     | 31.7211  | 31.42872 | 31.58021 | 26.54937 | 26.49031 | 25.492132 |
| ENSMUSG Ric3      | 1.349403 | 1.462596 | 1.1763   | 0.819687 | 1.182897 | 1.132016  |

|                          |          |          |          |          |          |           |
|--------------------------|----------|----------|----------|----------|----------|-----------|
| ENSMUSG Lhfp             | 70.66504 | 67.46034 | 78.64317 | 42.6853  | 42.01034 | 37.687931 |
| ENSMUSG Acss3            | 2.752903 | 4.073295 | 2.803712 | 2.441976 | 2.537811 | 1.817797  |
| ENSMUSG Htr1d            | 0        | 0        | 0        | 0.012164 | 0        | 0         |
| ENSMUSG C87414           | 0        | 0        | 0        | 0        | 0        | 0         |
| ENSMUSG Npy4r            | 0.059255 | 0.070794 | 0.053098 | 0.024805 | 0.04437  | 0.036411  |
| ENSMUSG Uros             | 4.456584 | 4.894985 | 4.246107 | 5.262999 | 4.832981 | 4.68737   |
| ENSMUSG Rrm1             | 10.75733 | 10.85904 | 9.648632 | 9.546878 | 12.02538 | 10.841114 |
| ENSMUSG Parp4            | 12.47075 | 10.51867 | 10.22571 | 9.494805 | 9.261761 | 9.555255  |
| ENSMUSG Pabpc4l          | 0.115461 | 0.229995 | 0.034353 | 0.10716  | 0.274625 | 0.120605  |
| ENSMUSG Ctbp2            | 25.01505 | 26.46274 | 25.48488 | 19.49497 | 23.56998 | 22.34178  |
| ENSMUSG Acsm5            | 0.091272 | 0.104305 | 0.017001 | 0        | 0.065592 | 0.018536  |
| Mus_musc Mus_musc        | 0        | 0        | 0        | 0.113074 | 0        | 0         |
| Mus_musc Mus_musc        | 0        | 0        | 0        | 0.563095 | 0.201578 | 0         |
| ENSMUSG Tlr13            | 2.889247 | 3.000137 | 4.325265 | 8.374207 | 7.028232 | 7.595279  |
| ENSMUSG Gm10100          | 0        | 0        | 0        | 0        | 0        | 0         |
| ENSMUSG Olfr895          | 0        | 0        | 0        | 0        | 0        | 0         |
| ENSMUSG Rpap2            | 2.659878 | 2.920189 | 3.305562 | 2.953243 | 2.897789 | 3.024805  |
| ENSMUSG Clcnka           | 0        | 0        | 0        | 0        | 0        | 0         |
| ENSMUSG Olfr885          | 0        | 0        | 0        | 0        | 0        | 0         |
| Mus_musc Mus_musc        | 0.086593 | 0        | 0.216524 | 0        | 0.12225  | 0         |
| Mus_musc Mus_musc        | 0.369134 | 0.232627 | 0        | 0.08453  | 0.214837 | 0.091344  |
| ENSMUSG Trim75           | 0        | 0        | 0        | 0        | 0.017112 | 0         |
| ENSMUSG Thoc2            | 11.10612 | 11.89866 | 9.749333 | 11.29119 | 10.48536 | 9.916306  |
| ENSMUSG Dtl              | 0.250256 | 0.21917  | 0.340388 | 0.848791 | 1.1458   | 1.299189  |
| ENSMUSG Tbx10            | 0        | 0        | 0        | 0        | 0        | 0         |
| ENSMUSG Ugg1             | 12.88132 | 12.80097 | 13.23595 | 14.78632 | 15.67037 | 15.747306 |
| ENSMUSG Nup210l          | 0.193959 | 0.193055 | 0.233789 | 0.17581  | 0.265456 | 0.169603  |
| ENSMUSG Creb3l4          | 1.783232 | 1.141501 | 1.472414 | 2.498193 | 2.74629  | 3.155218  |
| ENSMUSG Rab13            | 7.970713 | 8.610361 | 8.439187 | 7.795411 | 9.145011 | 8.203724  |
| ENSMUSG Jtb              | 28.40419 | 27.84645 | 28.95759 | 33.1706  | 32.93257 | 31.674436 |
| ENSMUSG Crtc2            | 15.59948 | 13.49751 | 17.1662  | 13.84576 | 13.54334 | 13.656484 |
| ENSMUSG Npr1             | 43.67079 | 39.4738  | 39.20943 | 35.80566 | 36.00574 | 36.959399 |
| ENSMUSG Ints3            | 13.42789 | 14.35509 | 14.03905 | 13.86581 | 15.06032 | 15.773622 |
| ENSMUSG Slc27a3          | 5.584998 | 4.855542 | 7.06576  | 6.522178 | 6.798136 | 7.393971  |
| ENSMUSG Olfr1532- $\rho$ | 0        | 0        | 0        | 0        | 0        | 0         |
| ENSMUSG Olfr713          | 0        | 0        | 0        | 0        | 0        | 0         |
| ENSMUSG Cfap44           | 3.386297 | 4.422645 | 1.8584   | 4.971286 | 4.35804  | 4.397055  |
| ENSMUSG Akr1c19          | 0.762326 | 0.918877 | 0.906451 | 0.993506 | 0.313564 | 0.622935  |
| ENSMUSG Slc4a8           | 1.150899 | 1.173523 | 0.774745 | 0.845812 | 0.871841 | 0.822019  |
| ENSMUSG Cpa2             | 0        | 0        | 0        | 0        | 0        | 0         |
| ENSMUSG Col5a2           | 8.600019 | 8.666695 | 8.815675 | 12.96743 | 12.78519 | 14.749439 |
| ENSMUSG Col3a1           | 29.5638  | 32.96208 | 30.69563 | 83.9134  | 79.02449 | 97.682724 |
| ENSMUSG Pcdhgc4          | 0.553237 | 0.714151 | 0.488565 | 0.968581 | 0.653672 | 1.024139  |
| ENSMUSG Med29            | 10.22445 | 9.71528  | 10.10543 | 9.477292 | 9.39233  | 9.968631  |
| ENSMUSG Krt7             | 82.77605 | 81.88287 | 78.41059 | 51.22501 | 51.25903 | 57.246925 |
| ENSMUSG Ercc5            | 9.23616  | 9.351153 | 7.844721 | 6.706503 | 7.032923 | 5.80024   |
| ENSMUSG Tex30            | 5.205033 | 6.225398 | 4.649461 | 5.254476 | 5.027706 | 6.414832  |
| ENSMUSG Marcks           | 25.09165 | 27.19613 | 25.18801 | 18.46656 | 19.98798 | 17.134464 |
| ENSMUSG Tppp             | 12.16726 | 15.28113 | 12.7262  | 7.171721 | 7.087707 | 7.133617  |
| ENSMUSG Sult3a1          | 0        | 0        | 0        | 0        | 0        | 0         |
| ENSMUSG Csnk2a1          | 24.29903 | 21.44375 | 22.85924 | 20.51178 | 20.24835 | 20.330171 |
| ENSMUSG Il22             | 0.105874 | 0.220203 | 0.087969 | 0.099236 | 0.11328  | 0.052187  |
| ENSMUSG Dhodh            | 5.219152 | 4.650182 | 5.262716 | 4.456764 | 4.459791 | 5.154798  |
| ENSMUSG Ap1g1            | 22.45829 | 21.52078 | 19.74891 | 20.15588 | 21.06806 | 21.360359 |
| ENSMUSG Phlpp2           | 4.905902 | 5.458946 | 5.203013 | 3.916708 | 4.183089 | 3.416237  |
| ENSMUSG Irx3             | 20.90525 | 18.587   | 16.20296 | 17.58209 | 16.24417 | 16.528468 |
| ENSMUSG Olfr429          | 0        | 0        | 0        | 0        | 0        | 0         |
| ENSMUSG Irx5             | 13.59676 | 11.05645 | 9.145603 | 9.546987 | 9.975742 | 10.357109 |
| ENSMUSG Irx6             | 0        | 0        | 0        | 0        | 0        | 0         |
| ENSMUSG Cdc42ep1         | 66.8839  | 62.62973 | 69.78462 | 33.64276 | 38.0422  | 35.802353 |
| ENSMUSG Wipf2            | 6.776641 | 7.324029 | 6.554705 | 5.60803  | 5.902329 | 6.223244  |
| ENSMUSG Ccdc138          | 1.042177 | 1.241765 | 0.94501  | 1.234841 | 0.932017 | 0.773057  |
| ENSMUSG Dnah10           | 0.903162 | 1.071019 | 0.647891 | 1.720749 | 1.378608 | 1.473634  |
| ENSMUSG Fam120a          | 45.18447 | 44.27937 | 43.08456 | 43.01899 | 45.80514 | 46.807182 |



|                   |          |          |          |          |          |           |
|-------------------|----------|----------|----------|----------|----------|-----------|
| ENSMUSG Prm2      | 0        | 0        | 0        | 0        | 0        | 0         |
| Mus_musc Mus_musc | 0        | 0.090861 | 0        | 0.278178 | 0.142824 | 0         |
| ENSMUSG Vmn2r76   | 0        | 0        | 0        | 0        | 0        | 0         |
| ENSMUSG Sft2d3    | 2.848052 | 1.958149 | 1.686698 | 1.993688 | 1.679478 | 1.941554  |
| ENSMUSG Sybu      | 1.511101 | 1.735081 | 1.372146 | 0.582988 | 0.799705 | 0.760019  |
| ENSMUSG Kcnv1     | 0        | 0        | 0        | 0        | 0        | 0.01259   |
| ENSMUSG A1bg      | 0        | 0        | 0        | 0        | 0        | 0         |
| ENSMUSG Myc       | 3.539357 | 3.027127 | 4.220901 | 4.124315 | 6.071942 | 6.368489  |
| ENSMUSG Nanos1    | 0.816863 | 0.962399 | 0.679745 | 0.675725 | 0.614321 | 0.613954  |
| ENSMUSG Tst       | 36.90604 | 44.62667 | 37.31599 | 43.79777 | 43.07596 | 44.84404  |
| ENSMUSG Olfr124   | 0        | 0        | 0        | 0        | 0        | 0         |
| ENSMUSG Celf5     | 0.120458 | 0.056263 | 0.084949 | 0.062576 | 0.093155 | 0.063129  |
| ENSMUSG Gm21366   | 0        | 0        | 0        | 0        | 0        | 0         |
| ENSMUSG Grip1     | 0.676292 | 0.798971 | 0.342062 | 1.009489 | 0.850937 | 0.773504  |
| ENSMUSG Scn7a     | 80.58362 | 79.10154 | 61.2173  | 38.11754 | 43.91647 | 44.219574 |
| ENSMUSG Olfr1444  | 0        | 0        | 0        | 0.013128 | 0        | 0.048942  |
| ENSMUSG Trarg1    | 3.994045 | 4.634278 | 4.656334 | 2.426055 | 3.120567 | 2.373448  |
| Mus_musc Mus_musc | 0        | 0        | 0        | 0        | 0.186692 | 0.16038   |
| Mus_musc Mus_musc | 0        | 0.063006 | 0.223871 | 0        | 0.260182 | 0.090067  |
| Mus_musc Mus_musc | 0.921097 | 1.143035 | 1.372422 | 0.791303 | 1.957828 | 0.593126  |
| Mus_musc Mus_musc | 0        | 0.269929 | 0        | 0        | 0        | 0         |
| Mus_musc Mus_musc | 4.551739 | 2.07676  | 3.510926 | 1.959638 | 2.113414 | 1.63619   |
| ENSMUSG Cmklr1    | 33.23601 | 32.47723 | 35.30646 | 31.15856 | 32.43212 | 33.493863 |
| ENSMUSG Zfp451    | 7.28413  | 7.027935 | 6.331504 | 6.211462 | 5.763727 | 5.574487  |
| ENSMUSG Slc35f2   | 0.166347 | 0.141641 | 0.121386 | 0.163132 | 0.16976  | 0.168921  |
| ENSMUSG Chchd7    | 12.89977 | 15.6064  | 15.01089 | 12.95355 | 11.55831 | 10.147962 |
| ENSMUSG Pars2     | 1.374825 | 1.432194 | 1.950278 | 2.276342 | 1.219568 | 2.009168  |
| Mus_musc Mus_musc | 0        | 0        | 0        | 0        | 0        | 0         |
| Mus_musc Mus_musc | 0        | 0.236499 | 0        | 0        | 0.173329 | 0         |
| Mus_musc Mus_musc | 0        | 0.110354 | 0.134808 | 0        | 0        | 0.090791  |
| Mus_musc Mus_musc | 0        | 0        | 0        | 0        | 0        | 0         |
| ENSMUSG Bcl2a1b   | 5.122262 | 6.206859 | 7.899368 | 16.86063 | 18.96273 | 18.953268 |
| ENSMUSG Gm43517   | 0        | 0        | 0        | 0        | 0        | 0         |
| Mus_musc Mus_musc | 0        | 0        | 0        | 0.176429 | 0        | 0         |
| ENSMUSG Zbtb11    | 7.532323 | 6.495292 | 6.246994 | 5.378757 | 5.831172 | 6.479745  |
| ENSMUSG Ammecr1   | 1.436329 | 1.467627 | 1.095553 | 1.607369 | 2.019519 | 1.895862  |
| ENSMUSG Mroh4     | 0        | 0        | 0        | 0        | 0        | 0         |
| ENSMUSG Lyn       | 34.08647 | 33.1498  | 37.23698 | 32.36794 | 32.33238 | 30.79033  |
| ENSMUSG Rabif     | 11.51145 | 10.39039 | 11.84496 | 10.67675 | 9.351518 | 9.495152  |
| ENSMUSG Gdf3      | 0.026546 | 0        | 0        | 0.153544 | 0.134155 | 0.093437  |
| ENSMUSG Hist1h2br | 0        | 0        | 0        | 0        | 0        | 0         |
| ENSMUSG Gm49027   | 0.819073 | 0.962252 | 0.269985 | 0.449114 | 0.750225 | 0.512847  |
| ENSMUSG Ptk2      | 31.75154 | 31.35762 | 31.81202 | 20.9759  | 21.76703 | 20.311428 |
| ENSMUSG Xrn1      | 7.370632 | 7.440221 | 6.730913 | 6.416747 | 6.152483 | 6.047348  |
| ENSMUSG Tfdp2     | 20.15514 | 21.79649 | 16.03467 | 13.68912 | 16.86242 | 14.506427 |
| ENSMUSG Atp1b3    | 76.08031 | 61.28674 | 69.13306 | 58.82627 | 66.9977  | 63.056126 |
| ENSMUSG Rasa2     | 4.481496 | 4.62177  | 4.313233 | 4.476328 | 4.544371 | 3.940205  |
| ENSMUSG Ube2cbp   | 0.129206 | 0.376118 | 0.143832 | 0.352893 | 0.34804  | 0.218142  |
| ENSMUSG Rwd2a     | 0.619041 | 0.655302 | 0.869491 | 0.558878 | 1.168887 | 1.00527   |
| ENSMUSG Me1       | 20.29081 | 24.66569 | 18.24428 | 34.89794 | 35.48844 | 40.293964 |
| ENSMUSG Tbx18     | 0.191086 | 0.24764  | 0.061559 | 0.207042 | 0.030763 | 0.277913  |
| ENSMUSG Ret       | 1.143052 | 1.916669 | 1.349122 | 0.602327 | 0.6693   | 0.682255  |
| ENSMUSG Pdgfra    | 45.46096 | 45.33339 | 49.88535 | 40.03687 | 44.45376 | 36.954737 |
| ENSMUSG Spin2d    | 0        | 0        | 0        | 0        | 0        | 0         |
| ENSMUSG Hoxa3     | 4.392541 | 3.473922 | 4.15734  | 3.608034 | 3.086787 | 3.100776  |
| ENSMUSG Pglyrp2   | 1.31995  | 0.946601 | 1.805686 | 2.390915 | 2.184901 | 2.039621  |
| ENSMUSG Maea      | 43.66618 | 44.09844 | 46.1076  | 42.81009 | 44.60481 | 45.698473 |
| ENSMUSG Dclre1b   | 3.375299 | 3.224425 | 3.320608 | 3.510224 | 4.648127 | 3.583806  |
| ENSMUSG Il1f9     | 1.51825  | 2.116951 | 2.748945 | 1.789274 | 0.448384 | 0.231686  |
| ENSMUSG Olfr868   | 0        | 0        | 0        | 0        | 0        | 0         |
| ENSMUSG Wnt2b     | 2.285393 | 2.384074 | 1.463655 | 1.223462 | 0.949385 | 1.251278  |
| ENSMUSG Wscd1     | 17.45948 | 11.94646 | 13.39532 | 7.947168 | 8.528488 | 8.768442  |
| ENSMUSG Olfr825   | 0        | 0        | 0        | 0        | 0        | 0         |
| ENSMUSG Nedd4l    | 16.60444 | 15.54342 | 16.77165 | 10.50236 | 11.22489 | 10.579653 |

|                    |          |          |          |          |          |           |
|--------------------|----------|----------|----------|----------|----------|-----------|
| ENSMUSG Ptchd1     | 0.124313 | 0.12231  | 0.152641 | 0.410711 | 0.238896 | 0.268361  |
| ENSMUSG Serpina5   | 0        | 0        | 0        | 0        | 0        | 0         |
| ENSMUSG Fbxo2      | 2.340685 | 2.54167  | 3.10512  | 3.278071 | 2.528464 | 3.159194  |
| ENSMUSG Napg       | 13.35099 | 13.87861 | 11.94242 | 11.69847 | 12.2776  | 10.637478 |
| ENSMUSG lsm2       | 0.050171 | 0.116801 | 0.233675 | 0.166232 | 0.124905 | 0.209197  |
| ENSMUSG Txnl1      | 23.45869 | 22.94221 | 22.28607 | 21.28933 | 21.13117 | 22.087624 |
| ENSMUSG Slc22a18   | 5.043499 | 5.194265 | 3.799363 | 4.505058 | 3.2115   | 5.264567  |
| ENSMUSG Gp1ba      | 0.692069 | 0.415076 | 0.780286 | 0.495921 | 0.356212 | 0.356322  |
| ENSMUSG Nars       | 34.25712 | 32.77796 | 34.85127 | 35.60549 | 37.57356 | 37.798698 |
| ENSMUSG Ccdc96     | 1.35304  | 1.608346 | 0.973704 | 2.486562 | 2.5524   | 2.689119  |
| Mus_musc Mus_musc  | 23.06788 | 23.78581 | 27.43315 | 23.74964 | 24.81491 | 30.559319 |
| Mus_musc Mus_musc  | 0        | 0        | 0        | 0        | 0        | 0         |
| Mus_musc Mus_musc  | 0        | 0        | 0        | 0        | 0        | 0.184186  |
| Mus_musc Mus_musc  | 1.311294 | 1.597201 | 1.478388 | 1.874578 | 2.025324 | 1.748166  |
| Mus_musc Mus_musc  | 0        | 0        | 0        | 0        | 0        | 0         |
| Mus_musc Mus_musc  | 0.447869 | 0.660954 | 0.499907 | 0.559293 | 0.703827 | 0.24749   |
| Mus_musc Mus_musc  | 0        | 0.127156 | 0        | 0.143769 | 0.19791  | 0         |
| ENSMUSG Oprl1      | 0.018185 | 0        | 0.018026 | 0        | 0        | 0         |
| Mus_musc Mus_musc  | 0.124047 | 0.361329 | 0.493593 | 0.129775 | 0.157484 | 0.251665  |
| Mus_musc Mus_musc  | 5.094936 | 4.365843 | 82.44224 | 38.80262 | 4.53023  | 5.257252  |
| ENSMUSG Helz2      | 16.39501 | 13.96055 | 16.6367  | 13.13186 | 14.01076 | 14.241989 |
| ENSMUSG Stmn3      | 0.148968 | 0        | 0.155255 | 0        | 0.197375 | 0         |
| ENSMUSG Zgpat      | 14.57035 | 14.66956 | 14.67009 | 13.51145 | 12.17877 | 13.693601 |
| ENSMUSG Zbtb46     | 10.36029 | 9.219344 | 11.18833 | 6.779779 | 6.907664 | 7.273773  |
| Mus_musc Mus_musc  | 3.228951 | 4.527315 | 3.575527 | 4.917229 | 4.65547  | 3.491255  |
| Mus_musc Mus_musc  | 0        | 0        | 0        | 0        | 0        | 0         |
| Mus_musc Mus_musc  | 0        | 0.199632 | 0.629021 | 0.076548 | 0.134153 | 0         |
| Mus_musc Mus_musc  | 0.573933 | 0.480173 | 0.872291 | 0.906615 | 0.596017 | 0.422629  |
| ENSMUSG Olfr680-ps | 0        | 0        | 0        | 0        | 0        | 0         |
| ENSMUSG Macc1      | 3.501313 | 3.388194 | 3.098669 | 3.866166 | 3.092457 | 3.87153   |
| ENSMUSG Ndufa7     | 69.69931 | 69.86    | 65.05581 | 66.24988 | 59.54023 | 63.922039 |
| ENSMUSG Shisa4     | 1.135868 | 0.651898 | 0.809705 | 1.575917 | 1.705116 | 1.550173  |
| ENSMUSG Khlh34     | 0.334472 | 0.567794 | 0.329666 | 0.525466 | 0.494855 | 0.636037  |
| ENSMUSG Kremen2    | 0.081749 | 0.086858 | 0.013926 | 0.099508 | 0.091807 | 0         |
| ENSMUSG Hmgn1      | 76.73833 | 76.82064 | 77.03752 | 62.92459 | 62.2397  | 68.928528 |
| ENSMUSG Madd       | 11.43159 | 11.75521 | 11.03942 | 11.96521 | 12.37581 | 11.899754 |
| ENSMUSG Tbl3       | 3.876971 | 3.428882 | 3.72143  | 4.389709 | 3.786435 | 4.711093  |
| ENSMUSG Olfr118    | 0        | 0        | 0        | 0        | 0        | 0         |
| ENSMUSG Ccrl2      | 25.17594 | 25.12322 | 27.16314 | 18.15914 | 18.45094 | 14.86431  |
| ENSMUSG Muc5b      | 0.301015 | 2.216167 | 0.094392 | 17.94738 | 18.27589 | 19.244951 |
| ENSMUSG Gm12666    | 2.050872 | 1.894833 | 2.32829  | 1.934335 | 1.729959 | 2.649606  |
| ENSMUSG Gm10153    | 0        | 0        | 0        | 0        | 0        | 0         |
| ENSMUSG Krtap5-1   | 0        | 0        | 0        | 0        | 0        | 0         |
| Mus_musc Mus_musc  | 0.143725 | 0.105977 | 0        | 0        | 0.321883 | 0         |
| Mus_musc Mus_musc  | 0.201292 | 0.087587 | 0.06572  | 0.121076 | 0.124204 | 0.103667  |
| Mus_musc Mus_musc  | 0        | 0        | 0        | 0.28763  | 0        | 0         |
| ENSMUSG E2f6       | 11.69881 | 11.89946 | 11.57643 | 9.612456 | 10.43569 | 9.35087   |
| Mus_musc Mus_musc  | 0        | 0        | 0.34396  | 0        | 0        | 0.37335   |
| Mus_musc Mus_musc  | 1.298099 | 2.01831  | 1.460485 | 1.478116 | 1.047693 | 0.516659  |
| ENSMUSG Olfr1415   | 0        | 0        | 0        | 0        | 0        | 0         |
| Mus_musc Mus_musc  | 1.102942 | 1.228604 | 0.985925 | 0.929024 | 1.073256 | 1.433042  |
| Mus_musc Mus_musc  | 0        | 0        | 0        | 0        | 0        | 0         |
| ENSMUSG Olfr591    | 0        | 0        | 0        | 0        | 0        | 0         |
| Mus_musc Mus_musc  | 0        | 0        | 0.132848 | 0        | 0.195143 | 0.193077  |
| ENSMUSG Gm10487    | 0        | 0        | 0        | 0        | 0        | 0         |
| ENSMUSG Nol10      | 5.59532  | 5.817807 | 5.916316 | 4.641467 | 5.770468 | 5.585886  |
| ENSMUSG Stx17      | 10.2374  | 9.228528 | 9.256144 | 10.45279 | 9.29472  | 10.466564 |
| ENSMUSG Olfr871    | 0        | 0        | 0        | 0        | 0        | 0         |
| ENSMUSG Gm4498     | 0        | 0        | 0        | 0        | 0        | 0         |
| ENSMUSG Tmem151a   | 3.456807 | 3.107063 | 2.699901 | 2.52923  | 1.866271 | 3.367002  |
| ENSMUSG Olfr1453   | 0        | 0        | 0        | 0        | 0        | 0         |
| ENSMUSG Gm21454    | 0        | 0        | 0        | 0        | 0        | 0         |
| Mus_musc Mus_musc  | 0        | 0        | 0.27619  | 0        | 0        | 0         |
| Mus_musc Mus_musc  | 0        | 0        | 0        | 0        | 0        | 0         |

|                   |          |          |          |          |          |           |
|-------------------|----------|----------|----------|----------|----------|-----------|
| ENSMUSG Tomm20    | 19.68894 | 16.79167 | 17.70932 | 16.28754 | 15.47106 | 17.482247 |
| Mus_musc Mus_musc | 0        | 0        | 0        | 0.35852  | 0.140991 | 0         |
| ENSMUSG Lamp2     | 100.9987 | 104.4345 | 102.6559 | 121.4498 | 123.335  | 124.344   |
| Mus_musc Mus_musc | 0.272646 | 0.230729 | 0        | 0        | 0.176024 | 0         |
| Mus_musc Mus_musc | 0.512177 | 0.485224 | 0.444213 | 0.90095  | 0.686942 | 0.627129  |
| Mus_musc Mus_musc | 0.984668 | 0.563001 | 0.739664 | 0.861872 | 0.826343 | 0.718145  |
| Mus_musc Mus_musc | 0.421292 | 0        | 0.132248 | 0.295623 | 0.261199 | 0         |
| ENSMUSG Gm4297    | 0        | 0        | 0        | 0        | 0        | 0         |
| ENSMUSG Sh3pxd2a  | 29.1703  | 28.25813 | 24.02628 | 19.19821 | 21.36663 | 19.564577 |
| ENSMUSG Gm9913    | 0.031938 | 0.028808 | 0.01364  | 0.047137 | 0.052952 | 0.033739  |
| ENSMUSG Stat6     | 38.28994 | 35.72705 | 36.86203 | 34.05911 | 35.00237 | 35.842812 |
| ENSMUSG Gm20390   | 0        | 0        | 0        | 0        | 0        | 0         |
| ENSMUSG Gm3755    | 0        | 0        | 0        | 0        | 0        | 0.027011  |
| ENSMUSG Hoxd12    | 0        | 0        | 0        | 0        | 0        | 0         |
| Mus_musc Mus_musc | 2.324612 | 1.858836 | 1.728314 | 0.339374 | 0.415134 | 0.716478  |
| Mus_musc Mus_musc | 0.94919  | 1.103863 | 0.816296 | 0.959479 | 1.319403 | 1.094287  |
| Mus_musc Mus_musc | 0.915157 | 0.987113 | 0.864906 | 0.770737 | 0.606897 | 1.048597  |
| Mus_musc Mus_musc | 0.290181 | 0.297136 | 0.327815 | 0.185671 | 0.072246 | 0.241927  |
| ENSMUSG Olfr1333  | 0        | 0        | 0        | 0        | 0        | 0         |
| Mus_musc Mus_musc | 0        | 0        | 0        | 0.313543 | 0        | 0         |
| Mus_musc Mus_musc | 0        | 0        | 0        | 0        | 0.245995 | 0.332835  |
| Mus_musc Mus_musc | 0        | 0        | 0        | 0        | 0        | 0         |
| Mus_musc Mus_musc | 1.277637 | 1.740328 | 1.207041 | 1.63548  | 1.459078 | 1.006071  |
| Mus_musc Mus_musc | 0        | 0        | 0        | 0.183577 | 0.410313 | 0         |
| ENSMUSG Zfp334    | 2.108404 | 2.43897  | 2.259843 | 1.697681 | 1.769231 | 1.49935   |
| ENSMUSG Slc35c2   | 11.89401 | 10.14542 | 11.64394 | 15.29608 | 14.00914 | 13.101651 |
| ENSMUSG Gm20929   | 0        | 0        | 0        | 0        | 0        | 0         |
| ENSMUSG Gm42906   | 0.064615 | 0.032508 | 0        | 0        | 0.039933 | 0         |
| ENSMUSG Nkx2-1    | 73.71677 | 49.86546 | 43.09204 | 36.38969 | 47.68702 | 47.859059 |
| ENSMUSG Pax9      | 0.013285 | 0.079415 | 0        | 0.11279  | 0.085317 | 0         |
| ENSMUSG F8a       | 4.396407 | 3.202487 | 3.480962 | 3.513598 | 3.946774 | 3.817618  |
| ENSMUSG Meox1     | 7.052452 | 7.453348 | 7.978669 | 5.385519 | 4.770207 | 4.636153  |
| ENSMUSG Kcnn4     | 2.044854 | 2.202474 | 1.839363 | 10.45618 | 9.913011 | 11.509237 |
| ENSMUSG Kik5      | 0        | 0        | 0        | 0        | 0        | 0         |
| ENSMUSG Rspo2     | 0.161307 | 0.214776 | 0.053759 | 0.130404 | 0.147821 | 0.279069  |
| ENSMUSG Gm3383    | 0.02178  | 0.005107 | 0.031784 | 0        | 0        | 0.021808  |
| ENSMUSG Hmgn5     | 12.64409 | 13.03052 | 12.91488 | 12.95008 | 12.73344 | 10.533854 |
| ENSMUSG Gm5849    | 0        | 0        | 0        | 0        | 0        | 0         |
| ENSMUSG Gm5169    | 0        | 0        | 0        | 0        | 0        | 0         |
| ENSMUSG Sh3bgrl   | 86.22044 | 87.40102 | 86.67993 | 81.33764 | 79.9977  | 72.231491 |
| ENSMUSG Gm21861   | 0        | 0        | 0        | 0        | 0        | 0         |
| ENSMUSG Krtap28-1 | 0        | 0        | 0.106096 | 0        | 0.102003 | 0         |
| Mus_musc Mus_musc | 0.188031 | 0        | 0        | 0        | 0        | 0         |
| ENSMUSG Rfx7      | 5.19721  | 4.937465 | 4.78877  | 5.243012 | 5.292793 | 5.359514  |
| ENSMUSG Akt1      | 70.2919  | 71.09215 | 76.17688 | 68.58595 | 73.25366 | 71.512176 |
| ENSMUSG Inf2      | 16.66016 | 13.31139 | 16.90822 | 13.50962 | 14.17374 | 14.73803  |
| ENSMUSG Olfr1065  | 0        | 0        | 0        | 0        | 0        | 0         |
| ENSMUSG Lmbrd2    | 6.56349  | 7.282151 | 5.743956 | 7.043261 | 6.103796 | 6.891273  |
| ENSMUSG Ldb2      | 47.9984  | 32.41433 | 42.36663 | 22.80248 | 23.74589 | 23.48248  |
| ENSMUSG Usp53     | 5.232822 | 5.24589  | 3.825858 | 3.202175 | 3.003291 | 3.498115  |
| ENSMUSG Nploc4    | 18.61616 | 18.8501  | 18.90181 | 17.49618 | 19.29037 | 18.363177 |
| ENSMUSG Apela     | 0.284458 | 0        | 0.154901 | 0        | 0.205457 | 0.046193  |
| ENSMUSG Fastkd5   | 2.490409 | 3.470788 | 2.434836 | 2.34624  | 2.638608 | 2.464229  |
| ENSMUSG Ifna14    | 0        | 0        | 0        | 0        | 0        | 0         |
| ENSMUSG Skint9    | 0        | 0        | 0        | 0        | 0        | 0         |
| ENSMUSG Scg5      | 1.145622 | 1.379969 | 0.784127 | 0.849193 | 0.706433 | 0.500566  |
| ENSMUSG Tab2      | 30.33528 | 30.64472 | 31.06519 | 26.54054 | 29.60765 | 26.349308 |
| ENSMUSG Ccl25     | 0.787833 | 1.038452 | 1.564977 | 1.462193 | 1.029965 | 1.189228  |
| ENSMUSG Serinc2   | 9.762646 | 9.502741 | 8.922682 | 8.152293 | 7.461501 | 7.413964  |
| ENSMUSG Hes6      | 15.35414 | 15.80797 | 14.35426 | 22.09836 | 19.47998 | 20.960051 |
| ENSMUSG Cnih1     | 31.85248 | 32.31445 | 31.05871 | 28.15651 | 28.25694 | 30.38019  |
| ENSMUSG Elp6      | 1.721066 | 2.411884 | 1.599679 | 2.107525 | 1.972209 | 2.531215  |
| ENSMUSG Gpr174    | 0.762931 | 0.561668 | 0.874732 | 1.406559 | 0.980827 | 1.366644  |
| ENSMUSG Cylc1     | 0        | 0        | 0        | 0        | 0        | 0         |

|                   |          |          |          |          |          |           |
|-------------------|----------|----------|----------|----------|----------|-----------|
| ENSMUSG Vamp5     | 22.77486 | 28.49439 | 31.49649 | 21.46225 | 22.41814 | 22.367995 |
| ENSMUSG Gm732     | 0        | 0        | 0        | 0        | 0        | 0         |
| ENSMUSG Tent5d    | 0        | 0        | 0        | 0        | 0        | 0         |
| ENSMUSG Polb      | 13.75334 | 13.74082 | 14.29821 | 13.44885 | 13.69757 | 12.73977  |
| ENSMUSG Ikbkb     | 17.12161 | 15.68844 | 17.47638 | 17.1253  | 16.70196 | 16.582242 |
| ENSMUSG Smim19    | 9.64147  | 9.227862 | 9.179933 | 8.652452 | 9.600851 | 7.869875  |
| ENSMUSG Amer1     | 3.896584 | 4.338786 | 3.513061 | 3.496238 | 3.402125 | 3.648106  |
| ENSMUSG Gm765     | 0.026896 | 0        | 0.015157 | 0.043393 | 0        | 0         |
| ENSMUSG Mrps31    | 7.370398 | 8.318883 | 7.850178 | 7.92457  | 6.873174 | 7.403801  |
| ENSMUSG Dusp4     | 5.82719  | 4.873695 | 5.192074 | 4.940916 | 5.02618  | 4.827427  |
| ENSMUSG Gm20708   | 0.976261 | 0.556171 | 0.477905 | 0.685572 | 1.24105  | 1.123297  |
| ENSMUSG Plat      | 18.10143 | 12.47265 | 19.51822 | 12.2638  | 13.71921 | 14.495021 |
| ENSMUSG Cgrf1     | 24.1538  | 23.32945 | 21.40514 | 18.05371 | 18.05188 | 16.482245 |
| ENSMUSG Rpl15     | 153.2395 | 154.6183 | 163.0943 | 198.0565 | 190.3184 | 193.86722 |
| ENSMUSG Mageb1    | 0        | 0.020251 | 0        | 0        | 0        | 0         |
| ENSMUSG Cnih4     | 12.16903 | 13.44265 | 11.47002 | 10.76035 | 10.37583 | 10.700905 |
| ENSMUSG Ppef1     | 0        | 0.018147 | 0        | 0        | 0.19579  | 0         |
| ENSMUSG Med12l    | 0.26024  | 0.363718 | 0.256135 | 0.250901 | 0.186764 | 0.314807  |
| ENSMUSG Oxct1     | 20.50921 | 24.16559 | 19.03863 | 35.06891 | 36.22617 | 36.302124 |
| ENSMUSG Acin1     | 34.23155 | 34.94286 | 37.7723  | 31.74671 | 32.69766 | 33.457119 |
| ENSMUSG Fbxo4     | 7.164578 | 8.048338 | 9.111434 | 7.629357 | 8.141695 | 9.442223  |
| ENSMUSG C6        | 10.68381 | 14.80722 | 9.81916  | 17.19858 | 15.05221 | 16.82908  |
| ENSMUSG Gm17571   | 0        | 0        | 0        | 0        | 0        | 0         |
| ENSMUSG Chrdl1    | 9.04039  | 6.991164 | 8.994637 | 5.124312 | 5.429395 | 4.789207  |
| ENSMUSG Pak3      | 0.063836 | 0.033225 | 0.050991 | 0.027177 | 0.032348 | 0.030042  |
| ENSMUSG Dcx       | 0        | 0        | 0        | 0        | 0        | 0.004527  |
| ENSMUSG Glt28d2   | 2.052416 | 2.755831 | 1.84075  | 1.481627 | 1.577857 | 2.048343  |
| ENSMUSG Prdm1     | 4.531974 | 3.634901 | 4.446443 | 5.801295 | 5.368674 | 4.3648    |
| ENSMUSG Ormdl3    | 18.31705 | 21.32124 | 20.50399 | 19.1609  | 18.83567 | 18.055145 |
| ENSMUSG Spon1     | 39.30615 | 41.53008 | 46.28335 | 32.5604  | 35.78678 | 31.753417 |
| ENSMUSG Gstp2     | 15.4683  | 3.503008 | 9.302225 | 4.560904 | 6.075063 | 5.014508  |
| ENSMUSG Tspan12   | 45.00468 | 43.39534 | 43.02691 | 28.03451 | 28.64148 | 25.167066 |
| ENSMUSG Tfpi2     | 0.673718 | 0.56106  | 1.047294 | 2.659376 | 2.121826 | 2.771461  |
| ENSMUSG Gnqt1     | 0        | 0        | 0        | 0        | 0        | 0         |
| ENSMUSG Col1a2    | 36.5997  | 35.53869 | 36.44121 | 57.09373 | 58.98571 | 62.512942 |
| ENSMUSG Tex26     | 1.603157 | 1.470822 | 0.698403 | 3.265368 | 2.176723 | 2.083299  |
| ENSMUSG Micu3     | 3.51965  | 4.147962 | 3.603593 | 2.719757 | 1.847191 | 2.003371  |
| ENSMUSG Adh5      | 33.24889 | 32.47721 | 31.13552 | 30.06952 | 31.22808 | 32.563955 |
| ENSMUSG Riiad1    | 2.291596 | 3.251517 | 1.592961 | 4.859332 | 3.743181 | 2.948929  |
| ENSMUSG Padi3     | 0.217173 | 0.334492 | 0.383756 | 0.460985 | 0.239485 | 0.212788  |
| ENSMUSG Padi1     | 0.070975 | 0.273802 | 0.097024 | 0.258428 | 0.083748 | 0.207835  |
| ENSMUSG Ptbp2     | 4.386244 | 5.388747 | 5.00498  | 5.222368 | 4.281293 | 3.605826  |
| ENSMUSG Snx27     | 12.54639 | 15.16494 | 13.73963 | 12.84814 | 15.1784  | 14.523665 |
| ENSMUSG Celf3     | 0.068267 | 0.036085 | 0.201461 | 0.153731 | 0.051766 | 0.061995  |
| ENSMUSG Sp4       | 6.096217 | 5.586875 | 4.615685 | 4.538    | 3.968792 | 4.39988   |
| ENSMUSG Tmem56    | 3.026839 | 4.177635 | 2.660796 | 4.021629 | 4.345653 | 4.136584  |
| ENSMUSG Rwdd3     | 3.428226 | 2.153091 | 1.661135 | 3.199612 | 2.066875 | 3.142984  |
| Mus_musc Mus_musc | 0        | 0        | 0        | 0        | 0.303565 | 0         |
| Mus_musc Mus_musc | 0.637738 | 0.579761 | 0.592622 | 0.657628 | 0.840597 | 0.298868  |
| Mus_musc Mus_musc | 0.327951 | 0.557966 | 0.249825 | 0.458665 | 0.393909 | 0.707152  |
| Mus_musc Mus_musc | 0.200567 | 0        | 0.031552 | 0.089239 | 0.42668  | 0         |
| Mus_musc Mus_musc | 0.308269 | 0.148456 | 0.304231 | 0.300632 | 0.159108 | 1.050287  |
| ENSMUSG Tnrc18    | 21.32812 | 20.76001 | 19.61037 | 18.46372 | 19.09676 | 19.30182  |
| ENSMUSG Gm29106   | 0.041993 | 0.022962 | 0.010274 | 0        | 0.00698  | 0.015425  |
| ENSMUSG Bcl2a1a   | 6.000741 | 5.909271 | 9.259442 | 14.33133 | 15.61391 | 14.965614 |
| ENSMUSG Sval3     | 0        | 0        | 0        | 0        | 0        | 0         |
| ENSMUSG Gm49395   | 1.922852 | 0.758328 | 0.858198 | 0.736241 | 0.508846 | 0.610999  |
| ENSMUSG Gm49398   | 0        | 0        | 0        | 0        | 0        | 0         |
| ENSMUSG Azi2      | 23.69685 | 26.09537 | 25.5236  | 21.99972 | 23.23465 | 20.304195 |
| ENSMUSG Fndc3b    | 13.74652 | 11.64539 | 15.30489 | 15.78507 | 18.75096 | 17.545506 |
| ENSMUSG Mfsd4b3   | 0.354177 | 0.499322 | 0.33856  | 0.808133 | 1.057499 | 0.970139  |
| ENSMUSG Tia1      | 7.148805 | 6.657478 | 6.926988 | 6.829236 | 7.095152 | 7.306673  |
| ENSMUSG Cpsf4l    | 0.069879 | 0.149709 | 0.125443 | 0.106182 | 0.170128 | 0.161682  |
| ENSMUSG Prmt7     | 4.833033 | 4.629419 | 5.109192 | 6.053152 | 5.398571 | 5.971592  |

|                   |          |          |          |          |          |           |
|-------------------|----------|----------|----------|----------|----------|-----------|
| ENSMUSG Hist1h4a  | 0.090702 | 0.085886 | 0        | 0.14496  | 0.073776 | 0         |
| ENSMUSG Rp2       | 9.111406 | 9.118761 | 9.284705 | 10.42207 | 11.33378 | 10.03081  |
| ENSMUSG Lama2     | 4.909652 | 4.579827 | 4.763539 | 3.866447 | 4.764109 | 4.662273  |
| ENSMUSG Ros1      | 1.11942  | 1.500979 | 1.010881 | 1.892162 | 1.815216 | 2.255545  |
| ENSMUSG Lrriq1    | 1.832204 | 2.128339 | 0.967912 | 2.109294 | 1.976119 | 1.971559  |
| ENSMUSG Dcbld1    | 9.206044 | 8.208116 | 8.160547 | 5.553992 | 5.324945 | 4.510888  |
| ENSMUSG Nts       | 0        | 0        | 0        | 0.098442 | 0        | 0         |
| ENSMUSG Ccdc59    | 13.43579 | 14.55139 | 14.3362  | 12.83176 | 12.72389 | 11.087778 |
| ENSMUSG Slc6a15   | 1.352865 | 1.861463 | 1.487503 | 0.686487 | 0.732657 | 0.662167  |
| ENSMUSG Spag16    | 3.195047 | 3.587989 | 1.699758 | 5.07201  | 4.944218 | 4.13405   |
| ENSMUSG Fes       | 11.56251 | 11.17945 | 14.53858 | 14.81876 | 15.88937 | 15.882026 |
| ENSMUSG Map3k5    | 12.97508 | 13.13173 | 12.0702  | 8.807973 | 9.090873 | 10.060813 |
| ENSMUSG Mterf3    | 12.98141 | 14.11248 | 14.86157 | 11.98359 | 11.42408 | 10.880954 |
| ENSMUSG Ptdss1    | 20.2691  | 19.88945 | 17.85681 | 16.83772 | 16.37165 | 17.300919 |
| ENSMUSG Tnfrsf19  | 6.666302 | 7.769139 | 8.957823 | 5.960837 | 5.974014 | 5.343014  |
| ENSMUSG Tmc1      | 0        | 0        | 0        | 0        | 0        | 0.023108  |
| ENSMUSG Zfp808    | 1.066202 | 1.35661  | 1.028631 | 1.290386 | 1.247416 | 1.420229  |
| ENSMUSG Zfp729a   | 2.482636 | 2.638329 | 1.997105 | 2.217798 | 2.245957 | 2.073461  |
| ENSMUSG Zfp934    | 1.276446 | 1.205807 | 1.4111   | 1.488745 | 0.825082 | 0.907178  |
| ENSMUSG Syt7      | 7.016006 | 8.296994 | 6.384089 | 7.45933  | 6.408022 | 8.502658  |
| ENSMUSG Zfp369    | 5.610003 | 6.718772 | 4.597597 | 6.404245 | 6.686679 | 5.874126  |
| ENSMUSG Ddb1      | 75.38654 | 70.81857 | 71.23827 | 62.46874 | 64.78822 | 68.587013 |
| ENSMUSG Fstl4     | 0.255515 | 0.228764 | 0.177576 | 0.271822 | 0.132603 | 0.154918  |
| ENSMUSG Son       | 56.74343 | 54.95118 | 60.16115 | 51.95607 | 47.33756 | 48.346435 |
| ENSMUSG Donson    | 4.490549 | 4.868172 | 4.537686 | 4.417835 | 4.818646 | 4.559255  |
| ENSMUSG Gart      | 13.28705 | 12.59183 | 12.68401 | 12.38959 | 11.19633 | 13.341744 |
| ENSMUSG Ifngr2    | 12.36905 | 11.47182 | 11.57897 | 17.53785 | 18.84868 | 19.868868 |
| ENSMUSG Tmem50b   | 67.94665 | 67.52168 | 69.02715 | 63.56391 | 60.60091 | 61.849356 |
| ENSMUSG Ifnar1    | 20.96678 | 21.4694  | 21.17225 | 22.44327 | 24.78514 | 23.210458 |
| ENSMUSG Il10rb    | 39.08119 | 34.03687 | 35.03508 | 39.08858 | 38.73695 | 42.749782 |
| ENSMUSG Slc28a2   | 1.023715 | 0.798672 | 1.564727 | 2.426039 | 1.501665 | 1.721713  |
| ENSMUSG Wfdc10    | 0.854949 | 0.100856 | 0.110416 | 0        | 0        | 0         |
| ENSMUSG Peg12     | 0.622997 | 0.660315 | 0.645669 | 0.676027 | 0.454497 | 0.636698  |
| ENSMUSG Cd82      | 45.9881  | 45.48582 | 52.68068 | 52.1311  | 45.14431 | 51.759413 |
| ENSMUSG Fcrlb     | 0.077614 | 0.159116 | 0.074732 | 2.300022 | 1.670198 | 1.551095  |
| ENSMUSG Tspan18   | 49.3532  | 53.8773  | 49.00568 | 36.40742 | 36.17068 | 31.653509 |
| ENSMUSG Meis2     | 5.501983 | 5.711898 | 5.293564 | 4.599553 | 4.654371 | 4.399513  |
| ENSMUSG Nsmce3    | 3.119848 | 2.463265 | 2.998262 | 2.201922 | 2.866384 | 2.953361  |
| ENSMUSG Msln      | 49.97294 | 55.20904 | 37.22504 | 30.7797  | 19.30601 | 37.119587 |
| ENSMUSG Ccni      | 77.13883 | 73.57817 | 64.82496 | 63.4548  | 67.88408 | 62.189828 |
| ENSMUSG Manbal    | 19.83477 | 19.81543 | 22.02381 | 18.71295 | 16.15403 | 18.801805 |
| Mus_musc Mus_musc | 0.497424 | 0.676659 | 0.455412 | 1.026067 | 0.688957 | 0.959662  |
| ENSMUSG Ahsa1     | 51.35914 | 70.11053 | 64.36604 | 55.17206 | 56.01983 | 60.173412 |
| ENSMUSG Fpr1      | 10.51386 | 11.44709 | 12.86199 | 1.640273 | 1.961821 | 1.595075  |
| ENSMUSG Slc19a2   | 2.582681 | 2.397692 | 1.9426   | 2.328094 | 2.61249  | 2.492007  |
| ENSMUSG 4930505A  | 0        | 0.045046 | 0.090099 | 0        | 0.185584 | 0.285954  |
| ENSMUSG Tyw5      | 4.323602 | 4.141623 | 4.669721 | 4.109585 | 3.958719 | 4.099162  |
| ENSMUSG Fbxw4     | 12.01927 | 11.57933 | 10.09923 | 11.27029 | 9.066122 | 10.383719 |
| ENSMUSG Sirt6     | 5.253715 | 3.881146 | 5.342169 | 6.194587 | 5.255997 | 5.990251  |
| ENSMUSG Nsmf      | 12.78748 | 12.85224 | 13.97163 | 11.76644 | 10.77793 | 11.861029 |
| ENSMUSG Ndor1     | 6.443847 | 7.127811 | 6.960424 | 6.902712 | 7.07055  | 7.508484  |
| ENSMUSG Pcdha7    | 0        | 0        | 0        | 0.015184 | 0        | 0         |
| ENSMUSG Nectin2   | 26.74694 | 30.15816 | 25.36258 | 28.15247 | 28.2735  | 32.132488 |
| ENSMUSG Tpcn1     | 21.65381 | 20.01712 | 20.15885 | 14.09041 | 14.70652 | 14.227252 |
| ENSMUSG 493342710 | 0        | 0        | 0        | 0        | 0        | 0         |
| ENSMUSG Hnf1a     | 0        | 0.037232 | 0        | 0.039817 | 0        | 0         |
| ENSMUSG Gm12888   | 0        | 0        | 0        | 0        | 0        | 0         |
| ENSMUSG Zfp784    | 0.240417 | 0.200788 | 0.130781 | 0.073364 | 0.137158 | 0.069253  |
| ENSMUSG Olfr1331  | 0        | 0        | 0        | 0        | 0        | 0         |
| ENSMUSG Heyl      | 6.89852  | 6.14443  | 9.00556  | 4.944809 | 5.360091 | 5.005222  |
| ENSMUSG Smco3     | 0        | 0.06324  | 0        | 0        | 0        | 0.029703  |
| ENSMUSG Sppl3     | 23.31614 | 23.42031 | 22.5205  | 17.15281 | 19.05448 | 18.992712 |
| ENSMUSG Serpini2  | 0        | 0        | 0        | 0        | 0        | 0         |
| ENSMUSG Sik3      | 11.80802 | 11.6561  | 10.7526  | 9.479922 | 9.754172 | 10.552112 |

|                   |          |          |          |          |          |           |
|-------------------|----------|----------|----------|----------|----------|-----------|
| ENSMUSG Snrnp40   | 12.20269 | 14.30123 | 14.94019 | 15.08244 | 15.64998 | 15.086992 |
| ENSMUSG Spp1      | 26.24013 | 29.56987 | 27.47957 | 188.5911 | 315.9765 | 395.37749 |
| ENSMUSG Ibsp      | 0        | 0.022385 | 0        | 0        | 0        | 0         |
| ENSMUSG Dmp1      | 0        | 0        | 0        | 0        | 0.035191 | 0         |
| ENSMUSG Sparcl1   | 187.7019 | 193.8615 | 205.3085 | 150.3068 | 175.4708 | 174.8761  |
| ENSMUSG Dcc       | 0        | 0        | 0        | 0        | 0        | 0         |
| ENSMUSG Nfic      | 41.04875 | 37.43597 | 31.73572 | 27.12764 | 26.64709 | 26.794345 |
| ENSMUSG Cdkn2b    | 21.25053 | 19.8142  | 20.45708 | 16.79494 | 18.66198 | 15.483305 |
| ENSMUSG Irf3      | 26.34265 | 23.83155 | 27.54594 | 24.19957 | 20.89797 | 22.250414 |
| Mus_musc Mus_musc | 0.365002 | 0        | 0        | 0        | 0        | 0         |
| Mus_musc Mus_musc | 0        | 0        | 0        | 0        | 0        | 0         |
| ENSMUSG Hpse2     | 0.225025 | 0.252758 | 0.352786 | 0.545916 | 0.491864 | 0.467868  |
| Mus_musc Mus_musc | 0        | 0        | 0        | 0        | 0        | 0         |
| Mus_musc Mus_musc | 0.065156 | 0.215476 | 0.546464 | 0.22055  | 0.154427 | 0.149661  |
| Mus_musc Mus_musc | 1.141557 | 1.638718 | 1.099302 | 1.117984 | 1.721666 | 0.871295  |
| ENSMUSG Fam196a   | 0.255542 | 0.416511 | 0.378512 | 0.128381 | 0.117114 | 0.067017  |
| ENSMUSG Grb2      | 39.85404 | 37.51897 | 38.92063 | 45.13976 | 44.79517 | 44.224464 |
| ENSMUSG Unc5c     | 0.878394 | 0.70067  | 0.706291 | 0.686057 | 0.932673 | 1.138233  |
| ENSMUSG 4930453N  | 6.904509 | 6.643039 | 6.857395 | 5.634127 | 5.463067 | 6.239617  |
| Mus_musc Mus_musc | 0.393535 | 0        | 0.110631 | 0        | 0        | 0.224528  |
| Mus_musc Mus_musc | 0        | 0.050318 | 0        | 0.203523 | 0.165791 | 0.127729  |
| ENSMUSG Psapl1    | 0.033208 | 0.03567  | 0.056224 | 0.174289 | 0.184494 | 0.131923  |
| Mus_musc Mus_musc | 0        | 0        | 0        | 0        | 0        | 0         |
| ENSMUSG Yod1      | 3.132541 | 3.682056 | 3.24448  | 2.684347 | 2.831949 | 2.974773  |
| Mus_musc Mus_musc | 0        | 0.431158 | 0.205137 | 0.394095 | 0        | 0         |
| Mus_musc Mus_musc | 0        | 0        | 0        | 0        | 0        | 0         |
| ENSMUSG 1700067K  | 0.052756 | 0.044225 | 0.107303 | 0.072653 | 0.090237 | 0.11385   |
| ENSMUSG Epop      | 3.417719 | 2.930676 | 3.502542 | 1.586901 | 2.569884 | 2.653989  |
| Mus_musc Mus_musc | 0        | 0.886845 | 0.352109 | 0.099228 | 0        | 0.077607  |
| ENSMUSG Ripor3    | 0.236878 | 0.252886 | 0.37652  | 0.208236 | 0.371716 | 0.428259  |
| ENSMUSG 4933428M  | 0        | 0        | 0.041493 | 0        | 0        | 0         |
| ENSMUSG Sun2      | 35.44489 | 30.12264 | 33.69593 | 29.16852 | 30.0846  | 29.905529 |
| ENSMUSG Dnal1     | 6.148611 | 6.294821 | 6.016996 | 5.205756 | 5.21163  | 4.829807  |
| ENSMUSG Ubap2l    | 37.33124 | 35.76066 | 34.75392 | 34.63472 | 37.57782 | 37.907959 |
| ENSMUSG Kcnj12    | 0.78988  | 0.772287 | 1.190074 | 0.807037 | 0.855069 | 0.506974  |
| ENSMUSG Cass4     | 1.921013 | 2.00708  | 3.119844 | 2.877699 | 2.055272 | 2.96451   |
| ENSMUSG Chr2      | 3.001811 | 4.491906 | 2.590295 | 2.084055 | 2.198733 | 1.796789  |
| Mus_musc Mus_musc | 0        | 0        | 0        | 0.174016 | 0        | 0         |
| Mus_musc Mus_musc | 0        | 0        | 0        | 0.200429 | 0        | 0         |
| Mus_musc Mus_musc | 0.188031 | 0        | 0        | 0        | 0        | 0         |
| Mus_musc Mus_musc | 0        | 0        | 0        | 0        | 0.560077 | 0         |
| Mus_musc Mus_musc | 0        | 0        | 0        | 0.174016 | 0        | 0         |
| Mus_musc Mus_musc | 0        | 0        | 0        | 0.539306 | 0        | 0.627654  |
| Mus_musc Mus_musc | 0.291418 | 0.794625 | 0.533425 | 0.900016 | 0.652223 | 0.368965  |
| ENSMUSG Dync1li2  | 40.46294 | 43.00406 | 42.24259 | 32.30947 | 33.09049 | 31.318655 |
| ENSMUSG Dcdc2b    | 1.857857 | 1.957909 | 1.473321 | 2.873255 | 2.20523  | 2.379979  |
| ENSMUSG Mrps2     | 8.132178 | 6.167808 | 7.353393 | 7.956052 | 7.112978 | 7.16786   |
| ENSMUSG Kiss1r    | 1.347105 | 1.514264 | 1.385093 | 1.185734 | 1.289767 | 1.559727  |
| ENSMUSG Krt20     | 0.042739 | 0.092381 | 0        | 0.039373 | 0.041272 | 0         |
| ENSMUSG Cd99l2    | 18.81744 | 19.78152 | 17.34774 | 14.01278 | 14.92952 | 14.623154 |
| ENSMUSG Fam229a   | 0.155682 | 0.117806 | 0.252193 | 0        | 0.084313 | 0         |
| ENSMUSG Ggta1     | 26.65465 | 25.13086 | 28.88296 | 22.48719 | 24.27375 | 23.996539 |
| ENSMUSG Olfr132   | 0        | 0        | 0        | 0        | 0        | 0         |
| ENSMUSG Amer3     | 0        | 0        | 0        | 0        | 0        | 0         |
| ENSMUSG Borcs6    | 10.87836 | 11.02814 | 10.9461  | 10.15583 | 10.64207 | 10.65926  |
| ENSMUSG Sox3      | 0        | 0.011209 | 0        | 0        | 0        | 0         |
| ENSMUSG Fgfrl1    | 10.51522 | 9.176821 | 9.325135 | 7.001221 | 7.028149 | 7.743057  |
| ENSMUSG Olfr159   | 0        | 0        | 0        | 0        | 0        | 0         |
| ENSMUSG Zfp354c   | 2.027281 | 2.544178 | 1.942881 | 1.481255 | 1.568847 | 1.927373  |
| ENSMUSG Araf      | 28.93907 | 28.14969 | 30.61098 | 27.89782 | 24.0953  | 26.452778 |
| ENSMUSG Gm6710    | 0.901916 | 2.442623 | 2.799191 | 3.679873 | 1.901718 | 0.803976  |
| ENSMUSG Gm2026    | 0.768003 | 1.288196 | 0.519744 | 0.956957 | 0.521921 | 1.030083  |
| ENSMUSG Gm14434   | 0.707918 | 1.830796 | 1.17687  | 1.987853 | 1.208904 | 1.446959  |
| ENSMUSG Gm14308   | 0.473067 | 1.951436 | 1.802473 | 2.545117 | 2.853462 | 0.819151  |

|                   |          |          |          |          |          |           |
|-------------------|----------|----------|----------|----------|----------|-----------|
| ENSMUSG Pcbp3     | 14.74932 | 14.23597 | 14.3083  | 8.614361 | 9.312528 | 9.789681  |
| ENSMUSG Gm14288   | 2.604039 | 4.265174 | 2.811785 | 3.049925 | 2.350227 | 2.474953  |
| ENSMUSG Cfp       | 6.147398 | 7.647523 | 6.021036 | 20.85726 | 24.01142 | 26.34066  |
| Mus_musc Mus_musc | 0        | 0        | 0        | 0        | 0        | 0         |
| Mus_musc Mus_musc | 3.486425 | 3.11568  | 1.498543 | 2.094161 | 3.024838 | 1.969848  |
| ENSMUSG Krtap19-5 | 0        | 0        | 0        | 0        | 0        | 0         |
| ENSMUSG Adam6b    | 0        | 0        | 0.038735 | 0.273053 | 0.273704 | 0.266003  |
| Mus_musc Mus_musc | 0        | 0        | 0.062588 | 0.509457 | 0.493293 | 0.445641  |
| ENSMUSG Xlr5a     | 0        | 0.01992  | 0        | 0        | 0        | 0         |
| ENSMUSG Dock1     | 15.4912  | 16.94304 | 13.51497 | 11.95025 | 13.29607 | 13.611548 |
| ENSMUSG Zglp1     | 0        | 0.000502 | 0        | 0        | 0        | 0         |
| ENSMUSG Rab27a    | 19.42359 | 19.79114 | 21.38519 | 23.62579 | 24.11777 | 24.191658 |
| ENSMUSG Ulbp1     | 1.601504 | 1.423862 | 1.583411 | 2.244122 | 2.644292 | 2.623263  |
| ENSMUSG Lipc      | 0.090098 | 0        | 0.145356 | 0.298003 | 0.335171 | 0.26448   |
| ENSMUSG Sbp       | 0        | 0        | 0        | 0        | 0        | 0         |
| ENSMUSG Prepl     | 10.46723 | 12.74006 | 9.669906 | 10.82016 | 10.41739 | 9.755444  |
| ENSMUSG Cdk6      | 6.725975 | 5.757947 | 7.18973  | 5.027722 | 4.381526 | 4.987388  |
| ENSMUSG Pacsin1   | 0.335623 | 0.225921 | 0.707932 | 0.930898 | 0.562161 | 0.781457  |
| ENSMUSG Bach2     | 3.900338 | 2.808713 | 2.576186 | 2.935739 | 2.496785 | 2.336937  |
| ENSMUSG E2f8      | 0.400465 | 0.263258 | 0.516866 | 1.117786 | 1.465618 | 1.371342  |
| ENSMUSG Accs      | 1.814605 | 1.384236 | 1.204458 | 1.481331 | 1.517875 | 1.985015  |
| ENSMUSG Lrprrc    | 8.077348 | 7.983476 | 8.286197 | 7.870973 | 7.579246 | 8.125641  |
| ENSMUSG Tpd52l1   | 0.597507 | 1.072566 | 0.751081 | 0.29322  | 0.663541 | 0.802037  |
| ENSMUSG Adad2     | 0        | 0        | 0        | 0        | 0        | 0         |
| ENSMUSG Lyar      | 13.36715 | 11.43417 | 14.4921  | 10.5918  | 11.84515 | 10.83213  |
| ENSMUSG Sap130    | 12.57028 | 12.5874  | 11.33391 | 12.21525 | 13.34783 | 14.288665 |
| ENSMUSG Syt4      | 0.028987 | 0.059472 | 0        | 0.02553  | 0        | 0         |
| ENSMUSG Tns1      | 333.9625 | 266.8905 | 276.6067 | 179.2888 | 184.3274 | 172.60583 |
| ENSMUSG Celf4     | 0.389188 | 0.70219  | 0.278015 | 0.327647 | 0.496691 | 0.461734  |
| ENSMUSG Tpgs2     | 2.956204 | 3.935368 | 3.017599 | 3.518121 | 3.302383 | 3.342836  |
| ENSMUSG Fcgr3     | 20.48728 | 19.52612 | 25.50171 | 62.05131 | 66.46375 | 71.916871 |
| ENSMUSG Nhs       | 0.22694  | 0.12697  | 0.192017 | 0.259631 | 0.205309 | 0.310178  |
| ENSMUSG Arhgef12  | 52.83189 | 58.45064 | 47.18064 | 40.49709 | 44.36723 | 39.318952 |
| ENSMUSG Serpina10 | 0.175668 | 0.400639 | 0.337872 | 1.198513 | 0.777404 | 0.917877  |
| ENSMUSG Gpr173    | 0.086483 | 0.242413 | 0.150564 | 0.182977 | 0.079138 | 0.156302  |
| ENSMUSG Olfr1302  | 0        | 0        | 0        | 0        | 0        | 0         |
| ENSMUSG Kdm5d     | 3.735049 | 3.82929  | 3.652997 | 4.068878 | 4.075492 | 3.482916  |
| ENSMUSG Prelid2   | 3.558053 | 3.467909 | 3.476141 | 4.86404  | 3.692331 | 4.597705  |
| ENSMUSG Rasip1    | 60.81863 | 40.51178 | 48.24128 | 29.37265 | 31.46511 | 29.054073 |
| ENSMUSG Epm2a     | 6.321105 | 5.758595 | 5.282917 | 3.470529 | 3.480702 | 4.39954   |
| ENSMUSG Pprc1     | 4.890747 | 5.403649 | 5.022378 | 4.848469 | 4.940155 | 6.126944  |
| Mus_musc Mus_musc | 0.742864 | 1.061179 | 2.72386  | 2.013492 | 1.030417 | 1.012533  |
| Mus_musc Mus_musc | 7.969504 | 7.213561 | 17.42273 | 15.6956  | 10.58457 | 11.07961  |
| Mus_musc Mus_musc | 0.358259 | 0.424616 | 0.053389 | 0.131143 | 0.170446 | 0         |
| Mus_musc Mus_musc | 0        | 0.025146 | 0.100157 | 0.210887 | 0        | 0.288619  |
| Mus_musc Mus_musc | 10.38998 | 9.265018 | 14.99562 | 17.86057 | 14.35541 | 14.83999  |
| Mus_musc Mus_musc | 2.865309 | 2.588215 | 7.048558 | 5.497708 | 3.229906 | 3.749341  |
| Mus_musc Mus_musc | 0.459068 | 0.33341  | 0.726983 | 0.874087 | 0.529803 | 0.496049  |
| Mus_musc Mus_musc | 0        | 0        | 0.32258  | 0        | 0        | 0         |
| ENSMUSG Mfsd4a    | 1.040986 | 1.18517  | 1.132705 | 9.393953 | 10.71017 | 9.714511  |
| ENSMUSG Ntrk3     | 0.369575 | 0.309411 | 0.557192 | 0.685764 | 0.805068 | 0.801717  |
| ENSMUSG Xk        | 0.472042 | 0.652379 | 0.33105  | 1.420892 | 1.475774 | 1.129647  |
| ENSMUSG Golga7    | 42.65183 | 44.75454 | 47.51499 | 44.37075 | 44.80656 | 41.548146 |
| ENSMUSG Cybb      | 24.78668 | 22.53128 | 26.77393 | 51.71363 | 49.32624 | 54.963787 |
| ENSMUSG Lrfn2     | 0        | 0        | 0        | 0.016304 | 0        | 0         |
| ENSMUSG Chrm4     | 0.071295 | 0        | 0        | 0.029607 | 0        | 0         |
| ENSMUSG Kif18b    | 0.177629 | 0.078862 | 0.247157 | 0.928993 | 0.792965 | 1.354179  |
| ENSMUSG Flrt3     | 14.12174 | 10.45737 | 11.79482 | 7.983917 | 7.363027 | 8.228507  |
| ENSMUSG Igsf23    | 0.500924 | 0.861722 | 0.698145 | 0.59419  | 0.645987 | 0.466451  |
| ENSMUSG Pcdh1     | 114.0678 | 93.38234 | 107.9073 | 54.54529 | 66.06026 | 55.862771 |
| ENSMUSG Plpp7     | 1.274113 | 0.89352  | 1.144636 | 0.5448   | 1.261019 | 0.821409  |
| ENSMUSG BC025446  | 0        | 0.030903 | 0.126195 | 0.140816 | 0        | 0         |
| ENSMUSG 4922502D  | 0        | 0        | 0        | 0        | 0        | 0         |
| ENSMUSG Bola2     | 9.318948 | 8.488084 | 9.918043 | 11.32842 | 9.289591 | 10.815364 |

|                   |          |          |          |          |          |           |
|-------------------|----------|----------|----------|----------|----------|-----------|
| ENSMUSG Vmn1r123  | 0        | 0        | 0        | 0        | 0        | 0         |
| ENSMUSG Olfr904   | 0        | 0        | 0        | 0        | 0        | 0         |
| Mus_musc Mus_musc | 0.318936 | 0.303855 | 0.524542 | 0.381851 | 0.3924   | 0.214031  |
| Mus_musc Mus_musc | 0.427342 | 0.347245 | 0.319113 | 0.091841 | 0        | 0.310942  |
| Mus_musc Mus_musc | 0.058195 | 0.67204  | 0.352195 | 0.160087 | 0.054195 | 0.458361  |
| Mus_musc Mus_musc | 0.047487 | 0.104853 | 0.013392 | 0.156624 | 0.25139  | 0.16734   |
| Mus_musc Mus_musc | 0        | 0        | 0        | 0        | 0        | 0.434631  |
| Mus_musc Mus_musc | 1.795464 | 1.657769 | 1.750066 | 1.864859 | 1.698079 | 1.647237  |
| Mus_musc Mus_musc | 0        | 0.126668 | 0        | 0        | 0        | 0         |
| Mus_musc Mus_musc | 0        | 0        | 0        | 0        | 0        | 0.444622  |
| ENSMUSG Zfp322a   | 6.865585 | 6.452228 | 5.931608 | 6.470791 | 6.770063 | 6.594792  |
| ENSMUSG Mettl15   | 2.942625 | 3.2758   | 2.599479 | 3.133706 | 2.17739  | 1.77696   |
| ENSMUSG Rbbp4     | 27.65079 | 27.74105 | 27.50656 | 24.14747 | 25.46502 | 24.595879 |
| ENSMUSG Aak1      | 7.74664  | 6.589214 | 6.99947  | 4.980595 | 5.488831 | 4.893152  |
| ENSMUSG Ebf4      | 1.835615 | 1.301915 | 1.805495 | 1.249893 | 1.322874 | 1.346824  |
| ENSMUSG Prl7a2    | 0        | 0        | 0        | 0        | 0        | 0         |
| Mus_musc Mus_musc | 0.071678 | 0        | 0        | 0        | 0        | 0.231896  |
| Mus_musc Mus_musc | 0        | 0.429496 | 0        | 0.201197 | 0.252181 | 0         |
| Mus_musc Mus_musc | 0        | 0.324214 | 0.401223 | 0        | 0.256702 | 0.269421  |
| ENSMUSG Zfp740    | 35.60525 | 35.44095 | 32.98982 | 26.91223 | 27.96681 | 26.297733 |
| ENSMUSG Vkorc1l1  | 13.64567 | 14.59813 | 13.19403 | 12.45072 | 11.38364 | 11.02329  |
| ENSMUSG Cldn34c2  | 0        | 0        | 0        | 0        | 0        | 0         |
| ENSMUSG Gm21863   | 0        | 0        | 0        | 0        | 0        | 0         |
| ENSMUSG Oas1a     | 0        | 0        | 0        | 0        | 0        | 0         |
| Mus_musc Mus_musc | 0.120363 | 0.362208 | 0.283488 | 0.401017 | 0.311477 | 0.366752  |
| ENSMUSG Xpo1      | 16.34525 | 16.97889 | 14.35389 | 14.86936 | 14.83486 | 14.67484  |
| Mus_musc Mus_musc | 0.025514 | 0.186415 | 0.166713 | 0.050087 | 0.069088 | 0.033323  |
| Mus_musc Mus_musc | 1.129497 | 1.161901 | 0.752552 | 2.088993 | 1.241605 | 1.685848  |
| Mus_musc Mus_musc | 0.392844 | 0.234818 | 0.199283 | 1.055048 | 0.293496 | 0.705977  |
| Mus_musc Mus_musc | 6.520218 | 2.467806 | 3.710845 | 2.066921 | 1.346117 | 1.636174  |
| ENSMUSG Gm572     | 0        | 0.03978  | 0        | 0        | 0        | 0.030853  |
| Mus_musc Mus_musc | 0.76477  | 0.418074 | 0.967077 | 0.274424 | 0.564127 | 0.739542  |
| Mus_musc Mus_musc | 0.159726 | 0.539917 | 0.260125 | 0.83902  | 0.570917 | 0.485222  |
| Mus_musc Mus_musc | 0.134417 | 0        | 0        | 0        | 0        | 0         |
| Mus_musc Mus_musc | 0        | 0        | 0        | 0        | 0        | 0         |
| Mus_musc Mus_musc | 1.95448  | 2.311096 | 1.623426 | 1.992189 | 2.308746 | 1.875577  |
| ENSMUSG Gja1      | 22.32025 | 20.4812  | 17.41071 | 20.84173 | 19.08153 | 22.035435 |
| ENSMUSG Zfp169    | 2.084877 | 2.781149 | 2.355683 | 2.687262 | 2.443081 | 2.397453  |
| ENSMUSG Insl6     | 0.903507 | 0.354824 | 0.489151 | 2.753044 | 3.589609 | 2.128288  |
| ENSMUSG Tpbpb     | 0        | 0        | 0        | 0        | 0        | 0         |
| ENSMUSG Gfi1b     | 0.168836 | 0.147873 | 0.055168 | 0.385376 | 0.39946  | 0.972902  |
| ENSMUSG Olfr984   | 0        | 0        | 0        | 0        | 0        | 0         |
| ENSMUSG Zfp36l2   | 47.49645 | 36.68644 | 44.76693 | 36.90981 | 43.28533 | 39.92268  |
| ENSMUSG Smug1     | 4.62713  | 4.654756 | 3.959704 | 4.786306 | 3.875533 | 4.405249  |
| ENSMUSG Phf24     | 1.557126 | 1.322618 | 1.329863 | 0.626529 | 0.514117 | 0.724978  |
| ENSMUSG Dhrrs1    | 25.57113 | 22.52081 | 23.76316 | 21.64822 | 22.1585  | 24.014734 |
| ENSMUSG Slc2a6    | 0.772286 | 0.566791 | 1.5096   | 2.794222 | 3.183463 | 3.107734  |
| ENSMUSG Gcnt4     | 0.055445 | 0.12355  | 0.085813 | 0.059761 | 0.06606  | 0.168291  |
| ENSMUSG Fnip2     | 6.176982 | 5.703887 | 6.076633 | 7.913082 | 9.533697 | 9.557635  |
| ENSMUSG Vmn1r18   | 0        | 0        | 0        | 0        | 0        | 0         |
| ENSMUSG Vmn2r83   | 0        | 0        | 0        | 0        | 0        | 0         |
| ENSMUSG Per2      | 25.32093 | 26.97654 | 22.34481 | 10.51242 | 11.82197 | 9.703154  |
| ENSMUSG Fam19a3   | 0.166553 | 0.109797 | 0.193752 | 0.231229 | 0.1302   | 0.11693   |
| ENSMUSG Izumo4    | 6.420372 | 3.19295  | 6.988771 | 5.008992 | 3.968477 | 4.002201  |
| ENSMUSG Pcf11     | 14.96191 | 14.80529 | 13.85145 | 12.59772 | 11.19004 | 13.016837 |
| ENSMUSG Ccdc146   | 1.941018 | 3.09934  | 1.496439 | 3.936448 | 4.217157 | 4.05067   |
| ENSMUSG Cdpf1     | 11.50023 | 13.07198 | 11.90851 | 11.94629 | 10.61625 | 11.217723 |
| ENSMUSG Hist1h4k  | 1.39758  | 0.913491 | 1.043397 | 1.937045 | 0.791049 | 1.261558  |
| ENSMUSG Tank      | 12.54838 | 12.81381 | 12.05308 | 17.662   | 17.25894 | 17.022792 |
| ENSMUSG Ywhah     | 114.7326 | 119.4751 | 132.5041 | 98.21327 | 103.4225 | 111.05313 |
| ENSMUSG Dtd2      | 4.398744 | 3.438831 | 4.27996  | 3.736481 | 3.357091 | 4.00083   |
| ENSMUSG Strn3     | 26.37109 | 29.37324 | 25.21967 | 20.99382 | 21.92865 | 23.58154  |
| ENSMUSG Ap4s1     | 13.32465 | 13.63626 | 13.5091  | 13.36076 | 13.25745 | 16.661934 |
| ENSMUSG Scfd1     | 15.32798 | 15.40099 | 16.78444 | 16.96759 | 18.49701 | 16.663305 |



|                   |          |          |          |          |          |           |
|-------------------|----------|----------|----------|----------|----------|-----------|
| ENSMUSG Coch      | 0.144257 | 0.351785 | 0.121173 | 0.172978 | 0.117266 | 0.056197  |
| ENSMUSG Foxg1     | 0        | 0        | 0        | 0        | 0        | 0         |
| ENSMUSG Cmc2      | 4.584311 | 5.385604 | 5.340384 | 7.825608 | 7.613518 | 5.894784  |
| ENSMUSG Csn2      | 0        | 0        | 0        | 0.096632 | 0.217093 | 0         |
| ENSMUSG Fam84b    | 29.88109 | 31.98441 | 23.43868 | 26.92483 | 26.15715 | 24.519051 |
| ENSMUSG lsy1      | 6.053411 | 7.657676 | 7.086741 | 6.113683 | 6.061289 | 7.018253  |
| ENSMUSG Cnbp      | 155.4931 | 153.039  | 150.6136 | 125.9491 | 120.0087 | 118.34136 |
| ENSMUSG Gp9       | 3.040947 | 2.047532 | 3.202117 | 1.136484 | 1.061031 | 1.597047  |
| ENSMUSG Rab43     | 19.05242 | 18.5878  | 21.27078 | 18.81714 | 18.54867 | 21.757045 |
| ENSMUSG Xpnpep2   | 1.636889 | 1.591285 | 2.199579 | 1.076462 | 0.532377 | 0.667484  |
| ENSMUSG Gkn1      | 0        | 0        | 0        | 0        | 0        | 0         |
| ENSMUSG Aplf      | 3.878498 | 4.100063 | 3.398859 | 3.812515 | 3.724468 | 3.646076  |
| ENSMUSG B930094E  | 0.165737 | 0.080274 | 0.150067 | 0.398302 | 0.231943 | 0.156816  |
| ENSMUSG Gm17581   | 0        | 0        | 0        | 0        | 0        | 0         |
| ENSMUSG Copg1     | 31.77204 | 27.8549  | 29.84176 | 28.84547 | 31.11044 | 30.856805 |
| ENSMUSG Tmf1      | 13.37786 | 14.47161 | 13.49296 | 12.78272 | 12.43791 | 11.731077 |
| ENSMUSG Srsy      | 0        | 0        | 0        | 0        | 0        | 0         |
| ENSMUSG Olfr706   | 0        | 0        | 0        | 0        | 0        | 0         |
| ENSMUSG Vmn1r126  | 0        | 0        | 0        | 0        | 0        | 0         |
| ENSMUSG Gm44805   | 0        | 0.461516 | 0        | 0        | 0.165252 | 0         |
| ENSMUSG Timm8a1   | 5.064675 | 4.450047 | 4.97684  | 7.454651 | 5.27061  | 5.771472  |
| ENSMUSG Tmem196   | 0.474113 | 0.206795 | 0.100397 | 0.472206 | 0.457385 | 0.071128  |
| ENSMUSG Catsper4  | 0.045345 | 0.114234 | 0.058369 | 0.12509  | 0        | 0         |
| ENSMUSG Gigyf2    | 13.72566 | 12.70529 | 12.09171 | 13.21571 | 12.55863 | 13.08585  |
| ENSMUSG Hes5      | 0.108565 | 0.088003 | 0.077236 | 0.122891 | 0.108378 | 0.203574  |
| ENSMUSG Insl5     | 0        | 0        | 0        | 0        | 0        | 0         |
| ENSMUSG Vmn1r174  | 0        | 0        | 0        | 0        | 0        | 0         |
| ENSMUSG Vmn2r94   | 0        | 0        | 0        | 0        | 0        | 0         |
| ENSMUSG Glipr1    | 10.31147 | 11.14687 | 13.88104 | 34.82775 | 37.07662 | 41.618655 |
| ENSMUSG Gadl1     | 0.579537 | 0.303118 | 0.419556 | 0.424526 | 0.479634 | 0.534345  |
| ENSMUSG Olfr533   | 0        | 0        | 0        | 0        | 0        | 0         |
| ENSMUSG Gm4559    | 0        | 0        | 0        | 0        | 0        | 0         |
| ENSMUSG Mrs2      | 11.32096 | 11.68984 | 9.664852 | 10.36014 | 10.29101 | 10.316941 |
| ENSMUSG Carmil1   | 23.52863 | 19.27081 | 19.06119 | 9.553302 | 10.39797 | 9.207968  |
| ENSMUSG Slc17a1   | 0.027008 | 0        | 0        | 0        | 0.051419 | 0         |
| ENSMUSG Scgn      | 0        | 0        | 0        | 0        | 0        | 0         |
| ENSMUSG Slc17a4   | 0        | 0        | 0        | 0        | 0        | 0         |
| ENSMUSG Smarca1   | 0.708232 | 0.815243 | 0.794661 | 0.532848 | 0.498349 | 0.701162  |
| ENSMUSG Syt8      | 0        | 0.344485 | 0        | 0.248461 | 0.084962 | 0         |
| ENSMUSG Nrpb1     | 45.37455 | 39.0275  | 44.45548 | 34.62488 | 34.03519 | 33.896292 |
| ENSMUSG Krtcap3   | 12.57821 | 12.6051  | 12.90552 | 10.93791 | 11.21307 | 10.651283 |
| ENSMUSG Nadsyn1   | 2.399146 | 1.944924 | 2.35632  | 2.45667  | 3.034163 | 2.561986  |
| ENSMUSG Dock11    | 3.592804 | 3.439071 | 4.201572 | 5.389866 | 5.085741 | 5.716568  |
| ENSMUSG Slc4a1ap  | 9.365092 | 9.246392 | 9.457009 | 9.267101 | 9.380775 | 9.131989  |
| ENSMUSG Cul4b     | 10.46997 | 11.43556 | 8.520485 | 10.49372 | 9.611793 | 10.902358 |
| ENSMUSG Ppm1g     | 40.01997 | 36.17946 | 40.89402 | 33.81013 | 34.93389 | 36.176945 |
| ENSMUSG Tnni2     | 0.813519 | 1.096402 | 1.335334 | 1.1858   | 0.933207 | 1.239483  |
| ENSMUSG Eif2b4    | 15.47374 | 15.64021 | 17.99009 | 16.37452 | 14.60231 | 14.533696 |
| Mus_musc Mus_musc | 3.878105 | 4.119288 | 0.975521 | 1116.841 | 840.2073 | 136.24832 |
| Mus_musc Mus_musc | 0.662118 | 1.192009 | 0.385018 | 76.55666 | 565.9885 | 157.91934 |
| ENSMUSG Pigx      | 14.22321 | 11.545   | 11.67381 | 13.80369 | 15.68264 | 13.478776 |
| Mus_musc Mus_musc | 2.145892 | 1.389853 | 0.404264 | 768.3774 | 463.2049 | 1133.954  |
| Mus_musc Mus_musc | 3.118845 | 1.175262 | 1.240423 | 52.94666 | 130.4231 | 14.606969 |
| Mus_musc Mus_musc | 0.10109  | 0.055297 | 0        | 79.13945 | 12.28937 | 96.337097 |
| Mus_musc Mus_musc | 2.146122 | 2.510332 | 1.104996 | 104.5835 | 30.03137 | 35.642559 |
| Mus_musc Mus_musc | 2.234481 | 3.687538 | 0.599331 | 159.0103 | 230.5838 | 756.31055 |
| Mus_musc Mus_musc | 3.285541 | 2.530293 | 1.828526 | 253.3345 | 128.4619 | 37.402176 |
| Mus_musc Mus_musc | 0        | 0        | 0        | 0        | 0        | 0         |
| ENSMUSG Zfp282    | 4.663335 | 4.90802  | 4.322453 | 4.222663 | 4.621314 | 3.832548  |
| ENSMUSG Pdia4     | 35.85408 | 36.04195 | 41.88212 | 90.78852 | 102.2041 | 94.958916 |
| ENSMUSG lscu      | 52.04824 | 45.22279 | 52.05968 | 47.58353 | 42.90112 | 45.287012 |
| ENSMUSG Yars      | 10.89444 | 10.1041  | 11.23972 | 11.67876 | 11.60586 | 12.704586 |
| ENSMUSG Hgs       | 3.943973 | 3.9131   | 2.980227 | 1.818678 | 3.945155 | 3.094752  |
| ENSMUSG Slc25a10  | 35.16165 | 33.7091  | 28.86642 | 32.04478 | 28.36839 | 32.362545 |

|                   |          |          |          |          |          |           |
|-------------------|----------|----------|----------|----------|----------|-----------|
| ENSMUSG Pgm1      | 18.69398 | 20.06203 | 17.93281 | 21.68009 | 21.60025 | 27.159391 |
| ENSMUSG Slco3a1   | 41.73959 | 40.71678 | 41.14897 | 27.59624 | 27.69878 | 24.59975  |
| ENSMUSG Rassf3    | 53.22474 | 56.11083 | 50.43686 | 46.72111 | 49.90588 | 44.76656  |
| ENSMUSG Rpl14     | 195.5489 | 214.5003 | 199.5416 | 229.46   | 211.6201 | 217.88317 |
| ENSMUSG Pxmp2     | 11.52335 | 11.75322 | 8.607722 | 10.2598  | 8.786915 | 8.208673  |
| ENSMUSG Adamts20  | 0.230138 | 0.219094 | 0.109271 | 0.10521  | 0.15753  | 0.272428  |
| ENSMUSG Cyp2d26   | 0        | 0        | 0        | 0        | 0        | 0         |
| ENSMUSG Ttll1     | 7.383605 | 6.657053 | 6.76697  | 5.152672 | 5.668731 | 5.337088  |
| ENSMUSG Lipa      | 36.17073 | 33.31007 | 32.57929 | 69.76306 | 75.71957 | 80.808092 |
| ENSMUSG C1qtnf6   | 3.016379 | 3.736792 | 4.157236 | 4.839779 | 4.720873 | 5.246164  |
| ENSMUSG Efcab6    | 0.666476 | 0.53919  | 0.568862 | 0.63225  | 0.523089 | 0.947409  |
| ENSMUSG Cdc37l1   | 19.99183 | 21.10834 | 19.69675 | 17.78188 | 17.17814 | 16.941031 |
| ENSMUSG Map3k9    | 5.153345 | 5.118206 | 4.600771 | 3.953454 | 4.166872 | 4.732384  |
| ENSMUSG Trafd1    | 22.58734 | 22.28532 | 36.02279 | 28.27099 | 26.46514 | 28.703717 |
| ENSMUSG Siah1a    | 14.83339 | 14.49783 | 13.79361 | 12.31989 | 10.19857 | 8.517941  |
| ENSMUSG Wdr74     | 11.78908 | 10.06581 | 13.31427 | 10.62875 | 8.876758 | 11.06472  |
| ENSMUSG Lin37     | 9.863477 | 8.441699 | 9.42377  | 8.086162 | 8.54173  | 8.448455  |
| ENSMUSG Slc9a5    | 1.301173 | 1.136239 | 1.358007 | 1.50853  | 1.483454 | 1.632673  |
| ENSMUSG Ceacam19  | 0.013595 | 0.040586 | 0.015079 | 0.23449  | 0.264513 | 0.308311  |
| ENSMUSG Olfr1102  | 0        | 0        | 0        | 0        | 0        | 0         |
| Mus_musc Mus_musc | 10.77066 | 20.61826 | 8.292344 | 3.221323 | 2.55415  | 11.223568 |
| ENSMUSG L3mbtl1   | 0        | 0        | 0        | 0        | 0        | 0         |
| ENSMUSG Utp6      | 11.43068 | 12.81503 | 11.70651 | 11.25389 | 11.16673 | 11.197188 |
| ENSMUSG Dcaf10    | 5.629039 | 6.435665 | 5.475186 | 5.631571 | 5.38104  | 5.48123   |
| ENSMUSG Olfr33    | 0        | 0        | 0        | 0        | 0        | 0         |
| ENSMUSG Kank3     | 75.48672 | 64.5987  | 78.7929  | 42.60519 | 44.24994 | 38.630934 |
| ENSMUSG Zfp239    | 0.276629 | 0.269675 | 0.276193 | 0.343349 | 0.30044  | 0.451852  |
| ENSMUSG Dao       | 0.069655 | 0.149733 | 0.084345 | 0.202102 | 0.213199 | 0.088914  |
| ENSMUSG Lce1c     | 0        | 0.06394  | 0        | 0        | 0        | 0         |
| ENSMUSG Iqcg      | 2.675693 | 5.263981 | 2.332459 | 4.80401  | 5.120064 | 4.250196  |
| ENSMUSG Frs2      | 9.122131 | 10.39337 | 8.797123 | 7.86904  | 8.241809 | 7.769374  |
| ENSMUSG Yeats4    | 24.63704 | 23.09762 | 23.71792 | 22.97322 | 23.70187 | 23.560773 |
| ENSMUSG Cobl      | 12.32852 | 14.1503  | 10.34271 | 9.447654 | 10.10888 | 11.680799 |
| ENSMUSG Svep1     | 8.829474 | 7.658469 | 8.468112 | 7.003219 | 7.951185 | 7.449327  |
| ENSMUSG Rab36     | 2.320388 | 1.827904 | 1.641057 | 2.763426 | 2.176214 | 2.216082  |
| ENSMUSG Grb10     | 13.10921 | 14.27876 | 12.04765 | 9.937166 | 10.31834 | 11.358959 |
| ENSMUSG 9530003J2 | 0.245003 | 0.273952 | 0.041104 | 0.138168 | 0.137181 | 0.220934  |
| ENSMUSG Adora2a   | 2.857846 | 2.607921 | 4.408332 | 3.56317  | 4.059852 | 3.962412  |
| ENSMUSG Rbm34     | 4.820776 | 3.868615 | 4.198734 | 4.293229 | 3.640228 | 4.121934  |
| ENSMUSG Txn1      | 94.11837 | 90.03221 | 104.4279 | 118.677  | 113.2243 | 120.35624 |
| ENSMUSG Vhl       | 9.59351  | 10.7613  | 9.132596 | 10.56369 | 10.64487 | 10.945624 |
| ENSMUSG Slc44a5   | 0        | 0.083895 | 0.029681 | 0        | 0.048063 | 0.047912  |
| ENSMUSG Tnfsf8    | 0.366135 | 0.296864 | 0.63949  | 1.596954 | 1.551601 | 1.521968  |
| ENSMUSG Bag1      | 113.1416 | 113.0288 | 106.2003 | 93.15535 | 96.15794 | 96.969413 |
| ENSMUSG Mapre1    | 21.68812 | 22.10116 | 21.91334 | 18.79682 | 19.25743 | 18.577301 |
| ENSMUSG Olfr994   | 0        | 0        | 0        | 0        | 0        | 0         |
| ENSMUSG Olfr995   | 0        | 0        | 0        | 0        | 0        | 0         |
| ENSMUSG 4833423E2 | 0        | 0        | 0        | 0        | 0        | 0         |
| ENSMUSG Olfr1000  | 0        | 0        | 0        | 0        | 0        | 0         |
| ENSMUSG Olfr1002  | 0        | 0        | 0        | 0        | 0        | 0         |
| ENSMUSG Olfr154   | 0        | 0        | 0        | 0        | 0        | 0         |
| ENSMUSG Olfr1006  | 0        | 0        | 0        | 0        | 0        | 0         |
| ENSMUSG Olfr1012  | 0        | 0        | 0        | 0        | 0        | 0         |
| ENSMUSG Olfr1208  | 0        | 0        | 0        | 0        | 0        | 0         |
| ENSMUSG Kif3b     | 10.65798 | 11.00815 | 10.56653 | 10.60274 | 10.88352 | 11.177637 |
| ENSMUSG Phf23     | 23.98114 | 21.22832 | 22.72171 | 23.70414 | 21.97284 | 22.524289 |
| ENSMUSG 2810408A  | 0.540079 | 0.51732  | 0.632958 | 0.55752  | 0.331435 | 0.720303  |
| ENSMUSG Acadvl    | 34.01125 | 32.73629 | 32.79913 | 28.4002  | 28.55024 | 27.753843 |
| ENSMUSG Cebpe     | 0.179551 | 0.552952 | 0.201063 | 5.050254 | 6.428325 | 8.557016  |
| ENSMUSG Sptlc3    | 0.680443 | 1.224    | 0.324521 | 1.152007 | 1.282562 | 1.263373  |
| ENSMUSG En2       | 0        | 0        | 0        | 0        | 0.022578 | 0.037836  |
| ENSMUSG Rln1      | 0        | 0        | 0        | 0        | 0        | 0         |
| ENSMUSG Rsad1     | 1.17902  | 0.940903 | 0.647894 | 0.55166  | 0.407362 | 0.58768   |
| ENSMUSG Wdr93     | 1.028042 | 1.156982 | 0.739401 | 1.270318 | 0.88256  | 1.526126  |

|                   |          |          |          |          |          |           |
|-------------------|----------|----------|----------|----------|----------|-----------|
| ENSMUSG Olfr1214  | 0        | 0        | 0        | 0        | 0        | 0         |
| ENSMUSG Olfr1211  | 0        | 0        | 0        | 0        | 0        | 0         |
| ENSMUSG Dact2     | 1.559442 | 1.702328 | 1.33818  | 1.254255 | 1.14721  | 1.444584  |
| ENSMUSG Pkd1l3    | 0.19348  | 0.208572 | 0.202081 | 0.326347 | 0.461256 | 0.299583  |
| ENSMUSG Ddx41     | 12.96938 | 13.54149 | 12.80158 | 13.89425 | 13.20683 | 15.364721 |
| ENSMUSG Fam193b   | 13.58957 | 14.04102 | 18.26426 | 14.10915 | 11.74072 | 11.703998 |
| ENSMUSG Pcbd2     | 9.046562 | 6.792673 | 8.76568  | 8.791467 | 10.37978 | 10.31672  |
| ENSMUSG Txndc15   | 22.91841 | 24.56832 | 27.58809 | 24.35753 | 25.03542 | 23.918518 |
| ENSMUSG Slc34a1   | 0        | 0        | 0        | 0.012583 | 0.035764 | 0         |
| ENSMUSG F12       | 0        | 0        | 0        | 0        | 0        | 0         |
| ENSMUSG Pdlim7    | 17.05503 | 16.26028 | 17.89564 | 15.3479  | 14.86169 | 15.156092 |
| ENSMUSG Gabbr1    | 9.735479 | 10.62415 | 12.21176 | 9.108089 | 8.354052 | 6.558222  |
| ENSMUSG Catsper3  | 0.187042 | 0.353171 | 0.189768 | 0.165904 | 0.213222 | 0.174631  |
| ENSMUSG Vmn1r90   | 0.025035 | 0.022782 | 0        | 0        | 0        | 0         |
| ENSMUSG Otol1     | 0        | 0        | 0        | 0        | 0        | 0         |
| ENSMUSG Entpd6    | 3.252587 | 3.169385 | 3.782806 | 4.661886 | 4.522769 | 4.765058  |
| ENSMUSG Gas7      | 2.951528 | 3.610667 | 3.8345   | 7.361503 | 7.900361 | 9.025758  |
| ENSMUSG Pfkml     | 8.609088 | 10.32724 | 7.437571 | 8.673026 | 7.989117 | 7.346102  |
| ENSMUSG Cntnap3   | 0        | 0        | 0        | 0        | 0        | 0         |
| ENSMUSG Lmo7      | 156.5863 | 152.3808 | 131.0221 | 77.69945 | 83.78956 | 72.744251 |
| ENSMUSG Resp18    | 0.980629 | 1.610758 | 0.428212 | 0.510882 | 0.772228 | 0.359508  |
| ENSMUSG Casp14    | 0        | 0        | 0        | 0        | 0        | 0         |
| ENSMUSG Txn2      | 35.03965 | 33.52657 | 36.34229 | 35.3381  | 35.71751 | 38.889291 |
| ENSMUSG Slc1a6    | 0.110836 | 0.271201 | 0.156447 | 0.144685 | 0        | 0.167393  |
| ENSMUSG Dusp12    | 8.320683 | 7.870189 | 9.519476 | 6.185642 | 6.078095 | 6.143785  |
| ENSMUSG Olfr836   | 0        | 0        | 0        | 0        | 0        | 0         |
| ENSMUSG Vpreb1    | 0.146547 | 0.312849 | 0.365661 | 0        | 0.300511 | 0.262333  |
| ENSMUSG Map3k20   | 13.11632 | 14.73495 | 12.80611 | 10.2893  | 10.22016 | 9.908712  |
| ENSMUSG Cs        | 42.55943 | 43.99927 | 42.81207 | 44.71996 | 46.42013 | 46.722183 |
| ENSMUSG Pan2      | 7.551363 | 6.901168 | 7.143144 | 6.494799 | 5.840386 | 5.963968  |
| ENSMUSG Apoa2     | 0        | 0        | 0.084099 | 0        | 0        | 0.090671  |
| ENSMUSG Bcas2     | 25.74628 | 25.00713 | 24.692   | 25.962   | 23.80375 | 24.391567 |
| ENSMUSG Ampd3     | 9.328756 | 7.9497   | 7.738783 | 5.75272  | 6.238121 | 5.906214  |
| ENSMUSG Taf6l     | 20.76957 | 19.16629 | 20.16379 | 23.71907 | 21.86999 | 20.737706 |
| ENSMUSG Ear1      | 41.79701 | 36.67607 | 34.53793 | 8.686904 | 16.35448 | 11.710105 |
| ENSMUSG Gm10376   | 0        | 0        | 0        | 0        | 0        | 0         |
| ENSMUSG Ctse      | 5.675083 | 5.138041 | 7.149791 | 20.62227 | 21.17228 | 21.095608 |
| ENSMUSG Ndrp2     | 32.55743 | 36.15903 | 35.18623 | 18.27965 | 22.62754 | 16.920741 |
| Mus_musc Mus_musc | 0        | 0        | 0.067841 | 0        | 0.373385 | 0         |
| Mus_musc Mus_musc | 0        | 0        | 0.173268 | 0.104653 | 0        | 0         |
| ENSMUSG Herc3     | 4.677216 | 2.7428   | 2.909076 | 3.568644 | 3.517652 | 3.181798  |
| ENSMUSG Abcg2     | 7.999249 | 8.387882 | 8.40254  | 6.034608 | 8.28051  | 5.579221  |
| Mus_musc Mus_musc | 0.154386 | 0        | 0.240829 | 0.081738 | 0.133382 | 0         |
| Mus_musc Mus_musc | 1.529455 | 1.582623 | 1.12531  | 1.776288 | 1.524417 | 1.615735  |
| Mus_musc Mus_musc | 0.044122 | 0.133306 | 0.042893 | 0        | 0.06746  | 0         |
| Mus_musc Mus_musc | 0        | 0.140802 | 0.19778  | 0        | 0        | 0         |
| ENSMUSG Vmn1r30   | 0        | 0        | 0        | 0        | 0        | 0         |
| ENSMUSG Dynl1f    | 21.25465 | 28.72619 | 18.62155 | 26.83546 | 22.70466 | 26.482016 |
| ENSMUSG Ccl21b    | 0.706802 | 0.540046 | 0        | 1.015397 | 0.176756 | 0.817705  |
| Mus_musc Mus_musc | 0.467108 | 0.999998 | 0.784786 | 0.487055 | 0.835424 | 0.782501  |
| Mus_musc Mus_musc | 0.900905 | 0.77934  | 0.684751 | 0.422248 | 0.48386  | 0.869148  |
| Mus_musc Mus_musc | 0.522061 | 0.325132 | 0.294483 | 0.316064 | 0.223098 | 0.159438  |
| Mus_musc Mus_musc | 0.476014 | 0.206026 | 0.490218 | 0.443653 | 0.059078 | 0.261421  |
| Mus_musc Mus_musc | 0.216967 | 0.051774 | 0.168936 | 0.055928 | 0.196556 | 0.165693  |
| Mus_musc Mus_musc | 0        | 0        | 0        | 0        | 0        | 0         |
| Mus_musc Mus_musc | 0.236307 | 0.033893 | 0.17288  | 0.729039 | 0.858531 | 1.448514  |
| ENSMUSG Cfi       | 0.647302 | 0.411641 | 0.341083 | 1.147736 | 2.444911 | 1.61374   |
| ENSMUSG Olfr186   | 0        | 0        | 0        | 0        | 0        | 0         |
| ENSMUSG Stbd1     | 20.30827 | 27.70913 | 23.4887  | 11.6952  | 11.4811  | 16.740755 |
| ENSMUSG Olfr1093  | 0        | 0        | 0        | 0        | 0        | 0         |
| ENSMUSG Sdr42e1   | 2.721911 | 1.804746 | 1.48841  | 1.86846  | 1.606651 | 2.135116  |
| ENSMUSG Ccdc15    | 1.472671 | 1.540214 | 0.854391 | 1.123087 | 1.177537 | 1.218267  |
| ENSMUSG Fam53c    | 9.988818 | 10.09132 | 9.527509 | 8.751302 | 8.990153 | 9.314789  |
| ENSMUSG Sel1l2    | 0        | 0        | 0.030037 | 0        | 0        | 0         |

|                   |          |          |          |          |          |           |
|-------------------|----------|----------|----------|----------|----------|-----------|
| ENSMUSG lsm1      | 24.41954 | 20.63539 | 27.1208  | 14.78754 | 17.33573 | 14.744811 |
| ENSMUSG Bhmt      | 0        | 0        | 0        | 0        | 0        | 0         |
| Mus_musc Mus_musc | 0.15676  | 0.387606 | 0.429091 | 0.159922 | 0.273386 | 0.445945  |
| Mus_musc Mus_musc | 0        | 0.206135 | 0        | 0        | 0        | 0         |
| Mus_musc Mus_musc | 0.166867 | 0.308253 | 0.403725 | 0.079379 | 0.03495  | 0.16149   |
| Mus_musc Mus_musc | 0        | 0        | 0        | 0        | 0        | 0         |
| Mus_musc Mus_musc | 0.245258 | 0.298555 | 0.220352 | 0.689406 | 0.243512 | 0.420425  |
| Mus_musc Mus_musc | 0.192338 | 0.353511 | 0.651242 | 0.0921   | 0.047504 | 0.093733  |
| Mus_musc Mus_musc | 0        | 0        | 0        | 0        | 0.356737 | 0         |
| Mus_musc Mus_musc | 0        | 0.045931 | 0.348276 | 0        | 0        | 0.083181  |
| ENSMUSG Ascl2     | 0.034649 | 0.122272 | 0.142034 | 0.182022 | 0.225714 | 0.26747   |
| ENSMUSG Zfp874a   | 3.679604 | 5.56833  | 3.454716 | 4.298076 | 4.404767 | 4.17859   |
| ENSMUSG Zfp825    | 3.548245 | 3.704269 | 4.289114 | 4.244294 | 4.047269 | 4.208335  |
| ENSMUSG lcmt      | 19.05959 | 20.56771 | 20.20869 | 16.26337 | 17.95319 | 17.153766 |
| ENSMUSG Oacyl     | 0.089768 | 0.023943 | 0.026342 | 0.087236 | 0        | 0.041712  |
| ENSMUSG Vva5b2    | 0.018566 | 0.097032 | 0        | 0.022372 | 0.061447 | 0.025998  |
| ENSMUSG Actrt1    | 0        | 0        | 0        | 0        | 0        | 0         |
| ENSMUSG Olfml2a   | 14.68967 | 13.10924 | 10.74524 | 8.113132 | 8.30893  | 7.731035  |
| ENSMUSG Tmem233   | 0.189474 | 0.212476 | 0.214018 | 0.196567 | 0.082304 | 0.042533  |
| Mus_musc Mus_musc | 0.074192 | 0.075435 | 0.331498 | 0        | 0        | 0.136487  |
| Mus_musc Mus_musc | 0.406168 | 1.014952 | 0.862627 | 0.356186 | 0.398803 | 0.233936  |
| Mus_musc Mus_musc | 1.559845 | 1.437741 | 1.099476 | 1.096334 | 1.093386 | 0.958257  |
| Mus_musc Mus_musc | 0        | 0        | 0        | 0        | 0        | 0         |
| ENSMUSG Arnt      | 25.65366 | 24.00689 | 24.10684 | 19.32294 | 19.92607 | 19.74745  |
| ENSMUSG Ppp2r5c   | 46.17248 | 42.22039 | 41.36015 | 43.14899 | 44.42476 | 42.658372 |
| ENSMUSG Mslnl     | 0        | 0.014527 | 0.063769 | 0        | 0.01543  | 0         |
| ENSMUSG Pif1      | 0.061209 | 0.060542 | 0.085382 | 0.595958 | 0.391951 | 0.645563  |
| ENSMUSG 4930596Dl | 0        | 0        | 0        | 0        | 0        | 0         |
| ENSMUSG Zbtb39    | 5.519039 | 6.075106 | 4.953859 | 4.144826 | 4.108586 | 4.148199  |
| ENSMUSG Mettl18   | 2.927575 | 2.977751 | 2.546708 | 1.992794 | 2.028918 | 2.864801  |
| ENSMUSG Mdfic     | 25.22545 | 22.89591 | 19.99366 | 23.56419 | 28.27556 | 25.911697 |
| ENSMUSG 1700013G; | 0        | 0        | 0        | 0        | 0        | 0         |
| ENSMUSG H2-T10    | 8.050282 | 8.012211 | 19.31891 | 11.93714 | 8.642304 | 10.751873 |
| ENSMUSG Gm11127   | 44.84816 | 31.68953 | 70.06412 | 58.45334 | 56.92309 | 58.323982 |
| ENSMUSG Nat8f6    | 1.145967 | 1.563576 | 1.754415 | 0.866753 | 1.026028 | 0.620998  |
| ENSMUSG Nat8f5    | 0.111257 | 0.265073 | 0.345061 | 0        | 0.162102 | 0.202552  |
| ENSMUSG Gm13420   | 0        | 0.039037 | 0        | 0.072892 | 0.106266 | 0         |
| ENSMUSG Slc3a2    | 131.4933 | 124.0336 | 140.3736 | 101.0403 | 112.8847 | 117.08394 |
| ENSMUSG Nxf1      | 29.11798 | 24.6413  | 29.7972  | 28.04853 | 29.13572 | 30.245156 |
| Mus_musc Mus_musc | 0        | 0        | 0        | 0.051512 | 0.102892 | 0.202823  |
| Mus_musc Mus_musc | 0.367033 | 0        | 0        | 0        | 0        | 0         |
| Mus_musc Mus_musc | 0.639445 | 0.464629 | 0.402362 | 0.404649 | 0.126978 | 0.387652  |
| Mus_musc Mus_musc | 0        | 0        | 0        | 0        | 0        | 0         |
| ENSMUSG Smco4     | 21.70521 | 20.85198 | 23.84141 | 17.78852 | 17.25489 | 18.18535  |
| ENSMUSG Krtap6-1  | 0        | 0        | 0        | 0        | 0        | 0         |
| ENSMUSG Hspa8     | 361.1297 | 545.1798 | 576.6236 | 386.2018 | 484.5297 | 493.29287 |
| ENSMUSG Gm5148    | 10.0451  | 9.977245 | 11.21658 | 9.617401 | 9.260653 | 10.480252 |
| ENSMUSG Trim15    | 0.191922 | 0.243063 | 0.269745 | 0.120689 | 0.044979 | 0.212383  |
| ENSMUSG Olfr164   | 0        | 0.042155 | 0        | 0.039821 | 0        | 0.093859  |
| ENSMUSG Cdc42bpa  | 38.28052 | 36.13073 | 23.77486 | 22.59764 | 22.41132 | 22.275638 |
| ENSMUSG Vmn2r81   | 0        | 0        | 0        | 0        | 0        | 0         |
| ENSMUSG Olfr1299  | 0        | 0        | 0        | 0        | 0        | 0         |
| ENSMUSG Olfr126   | 0        | 0        | 0        | 0        | 0        | 0         |
| ENSMUSG Fam222a   | 2.564993 | 3.441447 | 2.950098 | 2.833375 | 2.940564 | 2.948866  |
| ENSMUSG AW54987i  | 17.45132 | 17.29023 | 17.48716 | 15.47819 | 14.33538 | 13.557012 |
| ENSMUSG Agrn      | 58.50032 | 50.16855 | 58.18982 | 39.30593 | 38.66813 | 41.594882 |
| ENSMUSG Mvk       | 12.60381 | 12.19148 | 12.84571 | 13.8126  | 12.97179 | 14.746995 |
| ENSMUSG BC035044  | 0.905981 | 1.202687 | 1.931715 | 1.882659 | 1.498897 | 2.015242  |
| ENSMUSG Ugt1a10   | 0        | 0        | 0        | 0        | 0        | 0         |
| ENSMUSG Ear10     | 0.287128 | 0.268157 | 0.053801 | 1.043957 | 1.342322 | 1.076674  |
| ENSMUSG Usp28     | 3.521252 | 3.94807  | 3.116217 | 4.044606 | 3.441659 | 2.868952  |
| ENSMUSG Msemb     | 0        | 0        | 0        | 0        | 0        | 0         |
| Mus_musc Mus_musc | 0.30286  | 0.307048 | 0        | 0        | 0.207594 | 0         |
| ENSMUSG Zw10      | 6.728806 | 8.22574  | 7.257145 | 6.545794 | 7.173073 | 7.393216  |

|                    |          |          |          |          |          |           |   |
|--------------------|----------|----------|----------|----------|----------|-----------|---|
| Mus_musc Mus_musc  | 0        | 0        | 0        | 0        | 0        | 0         | 0 |
| ENSMUSG Gm21865    | 0        | 0        | 0        | 0        | 0        | 0         | 0 |
| ENSMUSG Ott        | 0        | 0        | 0        | 0        | 0        | 0         | 0 |
| ENSMUSG Olfr105-ps | 0        | 0        | 0        | 0        | 0        | 0         | 0 |
| Mus_musc Mus_musc  | 0        | 0        | 0        | 0        | 0.339441 |           | 0 |
| Mus_musc Mus_musc  | 4.500177 | 5.036918 | 3.626233 | 3.608829 | 3.94969  | 3.892999  |   |
| ENSMUSG H2a2c      | 0        | 0        | 0        | 0        | 0        | 0         | 0 |
| ENSMUSG Nkiras2    | 15.76575 | 17.99746 | 18.7795  | 18.09923 | 17.01505 | 19.998669 |   |
| ENSMUSG Bod1l      | 10.54203 | 10.02359 | 8.803186 | 8.334602 | 8.987747 | 9.353067  |   |
| ENSMUSG Sh3bgrl2   | 5.145897 | 6.142598 | 5.201123 | 5.301721 | 4.892873 | 5.954835  |   |
| ENSMUSG Kalrn      | 7.569939 | 8.749475 | 8.654055 | 8.240333 | 9.928104 | 7.327533  |   |
| ENSMUSG Dhx58      | 3.163494 | 2.153073 | 4.452769 | 3.292277 | 3.382986 | 3.161749  |   |
| ENSMUSG Armt1      | 4.43989  | 4.450801 | 3.86922  | 4.683592 | 4.485553 | 4.550363  |   |
| ENSMUSG Akr1b10    | 10.26131 | 10.7583  | 11.44312 | 10.7329  | 11.12688 | 11.569256 |   |
| Mus_musc Mus_musc  | 0        | 0        | 0        | 0        | 0        | 0         | 0 |
| Mus_musc Mus_musc  | 0        | 0        | 0        | 0.139395 | 0        | 0         | 0 |
| Mus_musc Mus_musc  | 2.485915 | 1.795158 | 2.207651 | 2.243361 | 2.611302 | 1.135951  |   |
| Mus_musc Mus_musc  | 0        | 0        | 0.168936 | 0        | 0        | 0         | 0 |
| Mus_musc Mus_musc  | 0.076415 | 0.355123 | 0.239905 | 0        | 0.246792 | 0.558025  |   |
| Mus_musc Mus_musc  | 0.050163 | 0        | 0.094209 | 0        | 0.100898 | 0         | 0 |
| ENSMUSG Cacnb2     | 2.05907  | 1.614437 | 1.859193 | 1.865782 | 1.410447 | 1.307402  |   |
| Mus_musc Mus_musc  | 0.448986 | 0.134279 | 0.123995 | 0.292816 | 0        | 0.086485  |   |
| ENSMUSG Rhox4g     | 0        | 0        | 0        | 0        | 0        | 0         | 0 |
| ENSMUSG Tmprss5    | 0.226028 | 0.070945 | 0.052402 | 0.024284 | 0.144453 | 0.069412  |   |
| ENSMUSG Olfr951    | 0        | 0        | 0        | 0        | 0        | 0         | 0 |
| ENSMUSG Igkv4-62   | 0.195866 | 0        | 0        | 2.725484 | 13.26305 | 1.103561  |   |
| ENSMUSG Krtap13-1  | 0        | 0        | 0        | 0        | 0        | 0         | 0 |
| ENSMUSG Gm10220    | 0        | 0        | 0        | 0        | 0        | 0         | 0 |
| ENSMUSG D10Jhu81e  | 24.63862 | 24.8123  | 23.62008 | 19.42233 | 22.42934 | 21.966658 |   |
| ENSMUSG Commd5     | 13.09855 | 11.09766 | 10.68245 | 13.83686 | 11.54243 | 12.91969  |   |
| ENSMUSG Zscan4-ps  | 0        | 0        | 0        | 0        | 0        | 0         | 0 |
| ENSMUSG Nipal2     | 6.403272 | 5.107363 | 5.216581 | 3.617917 | 3.407598 | 4.25927   |   |
| ENSMUSG Bpgm       | 26.11272 | 26.71969 | 28.27538 | 16.6123  | 16.99632 | 14.841926 |   |
| ENSMUSG Zfhx3      | 3.386526 | 3.361543 | 2.822635 | 2.730656 | 2.578166 | 2.837152  |   |
| ENSMUSG Clec10a    | 0.863557 | 1.385389 | 0.953134 | 4.497501 | 4.819804 | 3.691628  |   |
| ENSMUSG Rnf146     | 24.07482 | 22.67795 | 24.73281 | 18.85814 | 19.61741 | 20.276716 |   |
| ENSMUSG Myh4       | 0        | 0        | 0        | 0        | 0        | 0         | 0 |
| ENSMUSG Nxf3       | 0.079936 | 0.079953 | 0.029896 | 0.066848 | 0.093158 | 0.0321    |   |
| ENSMUSG Olfr495    | 0        | 0        | 0        | 0        | 0        | 0         | 0 |
| ENSMUSG Olfr65     | 0        | 0        | 0        | 0        | 0        | 0         | 0 |
| ENSMUSG Srsf1      | 36.0514  | 34.60644 | 36.05151 | 36.92108 | 31.69968 | 31.817048 |   |
| ENSMUSG Cuedc1     | 13.87336 | 13.87965 | 13.78255 | 10.258   | 9.365862 | 10.157002 |   |
| ENSMUSG Cep95      | 3.232929 | 3.801164 | 3.366459 | 3.88647  | 3.436456 | 3.632653  |   |
| ENSMUSG Vezf1      | 24.98433 | 26.00636 | 22.10755 | 19.2346  | 19.11964 | 19.037363 |   |
| ENSMUSG Lsm14a     | 58.85492 | 62.09793 | 61.74082 | 46.71643 | 48.95149 | 45.15751  |   |
| Mus_musc Mus_musc  | 0        | 0        | 0        | 0        | 0        | 0         | 0 |
| ENSMUSG Asap2      | 14.9017  | 12.27996 | 12.81278 | 9.089533 | 8.636996 | 8.488733  |   |
| ENSMUSG Sh2d6      | 0.085234 | 0        | 0.062632 | 0.10257  | 0.081112 | 0.329493  |   |
| ENSMUSG Adgrl1     | 11.0508  | 11.05689 | 11.81399 | 7.771918 | 8.409014 | 7.591078  |   |
| ENSMUSG Mamdc2     | 20.06054 | 16.58515 | 19.93729 | 14.08123 | 12.4652  | 12.599487 |   |
| ENSMUSG A730061H   | 0.72765  | 1.73298  | 1.507469 | 0.857736 | 1.005382 | 0.480646  |   |
| ENSMUSG Zfand2a    | 14.66779 | 13.75217 | 16.35003 | 13.13794 | 11.08489 | 13.249487 |   |
| ENSMUSG Tanc2      | 3.810073 | 5.056386 | 2.911435 | 4.944401 | 5.167543 | 5.447786  |   |
| ENSMUSG Ube2ql1    | 0.062513 | 0.078828 | 0.080804 | 0.064622 | 0.15297  | 0.073771  |   |
| ENSMUSG Srsf12     | 0.091681 | 0.065367 | 0.051733 | 0.082834 | 0.05747  | 0.073136  |   |
| ENSMUSG Tmem119    | 17.91721 | 18.88639 | 20.97118 | 15.77877 | 15.32943 | 14.236864 |   |
| ENSMUSG 1600014C   | 7.028104 | 6.692956 | 7.545111 | 8.094366 | 8.733094 | 9.202274  |   |
| ENSMUSG 5830411N   | 0.432159 | 0.196188 | 0.145298 | 1.124444 | 0.445783 | 0.659422  |   |
| ENSMUSG Pabpc1l    | 0        | 0.083644 | 0.087267 | 0.048137 | 0.172179 | 0.090919  |   |
| ENSMUSG Pla2r1     | 4.764173 | 4.482368 | 4.891785 | 2.838382 | 2.480695 | 2.245897  |   |
| ENSMUSG Gm9949     | 0.847314 | 0.738022 | 0.632896 | 0.651757 | 0.746964 | 0.557154  |   |
| ENSMUSG Gm7978     | 0        | 0        | 0        | 0        | 0        | 0         | 0 |
| ENSMUSG Duox1      | 0.014923 | 0.013155 | 0.031112 | 0.141902 | 0.255989 | 0.287732  |   |
| ENSMUSG Olfr1010   | 0        | 0        | 0        | 0        | 0        | 0         | 0 |

|                   |          |          |          |          |          |           |
|-------------------|----------|----------|----------|----------|----------|-----------|
| ENSMUSG Rrp1      | 55.85011 | 54.15032 | 54.65445 | 49.99716 | 47.10548 | 51.394394 |
| ENSMUSG Zdhhc20   | 13.45424 | 13.3481  | 12.9367  | 13.76347 | 13.00465 | 13.488487 |
| ENSMUSG Ska3      | 0.188364 | 0.159602 | 0.227273 | 0.718698 | 1.086642 | 1.01613   |
| ENSMUSG Prss52    | 0        | 0        | 0        | 0        | 0        | 0         |
| ENSMUSG Mrpl57    | 5.07443  | 5.638859 | 5.231208 | 7.758023 | 6.601655 | 6.965339  |
| ENSMUSG 4930578I0 | 0        | 0        | 0        | 0        | 0        | 0         |
| ENSMUSG Dcp1a     | 6.800273 | 6.358438 | 7.185526 | 6.171933 | 6.280341 | 6.391249  |
| ENSMUSG Sap18     | 14.45347 | 14.65873 | 15.63182 | 13.69006 | 13.12045 | 13.565432 |
| ENSMUSG Kiss1     | 0.006374 | 0        | 0.10946  | 0        | 0        | 0         |
| ENSMUSG Gm20458   | 0        | 0        | 0        | 0        | 0        | 0         |
| ENSMUSG Ccl19     | 0        | 0.242339 | 0.633772 | 0.805774 | 1.448098 | 1.253962  |
| ENSMUSG Olfr155   | 0        | 0        | 0        | 0        | 0        | 0         |
| ENSMUSG Hrct1     | 2.419545 | 2.423782 | 2.819907 | 1.264374 | 1.167727 | 1.282454  |
| ENSMUSG BC005537  | 43.23156 | 41.90209 | 40.16842 | 38.47352 | 38.29208 | 36.783623 |
| ENSMUSG Isyna1    | 28.67555 | 28.05209 | 29.28873 | 38.94413 | 38.32941 | 44.907323 |
| ENSMUSG Irs1      | 3.964309 | 4.455933 | 3.266709 | 2.407718 | 2.613591 | 2.317375  |
| ENSMUSG Gm36028   | 0.1192   | 0.039873 | 0.207496 | 0.164274 | 0.202933 | 0.128819  |
| Mus_musc Mus_musc | 0        | 0.311459 | 0.417325 | 0.03224  | 0.614223 | 0.465934  |
| ENSMUSG Zfp735    | 0        | 0        | 0        | 0        | 0        | 0         |
| ENSMUSG Cd37      | 11.98647 | 9.458245 | 12.73296 | 24.62104 | 19.75575 | 23.990904 |
| ENSMUSG Fus       | 38.56722 | 27.42441 | 32.71975 | 24.37834 | 30.55509 | 25.070141 |
| ENSMUSG Hist1h4i  | 3.695969 | 4.720654 | 3.686735 | 6.961724 | 4.188123 | 3.70488   |
| ENSMUSG Tead2     | 8.368371 | 9.457196 | 9.252486 | 8.615015 | 9.160418 | 6.768402  |
| ENSMUSG Adm       | 4.556854 | 4.243783 | 5.619983 | 5.695774 | 4.530715 | 7.4879    |
| ENSMUSG Pycard    | 1.078583 | 1.193424 | 1.458653 | 3.359751 | 3.782338 | 3.211093  |
| ENSMUSG Dkk1      | 0.522201 | 0.786639 | 0.614189 | 1.028867 | 1.084571 | 0.651144  |
| Mus_musc Mus_musc | 0        | 0.257012 | 0.155993 | 0        | 0        | 0.161182  |
| ENSMUSG Ccdc167   | 2.818522 | 3.188924 | 2.570408 | 3.362669 | 3.180349 | 3.13462   |
| Mus_musc Mus_musc | 0        | 0        | 0        | 0        | 0.125328 | 0.368372  |
| ENSMUSG Lgi4      | 0.563642 | 0.709479 | 0.749077 | 1.443699 | 2.403002 | 1.805996  |
| ENSMUSG Ppp6r2    | 9.489945 | 9.300422 | 8.695781 | 7.585183 | 9.285018 | 8.314728  |
| ENSMUSG NdrG4     | 0.39488  | 0.862616 | 0.431055 | 0.701637 | 0.411151 | 0.467355  |
| ENSMUSG Ttyh3     | 36.99611 | 32.14416 | 36.14523 | 28.11567 | 28.49491 | 27.768242 |
| ENSMUSG C2cd4d    | 0.103624 | 0        | 0        | 0        | 0        | 0         |
| ENSMUSG Phf11b    | 4.3252   | 3.648032 | 8.307981 | 7.682948 | 4.126153 | 6.012757  |
| ENSMUSG Bical     | 7.946679 | 7.840124 | 6.883389 | 6.886138 | 6.769492 | 6.087502  |
| Mus_musc Mus_musc | 0        | 0        | 0.061943 | 0.396143 | 0.45099  | 0.291448  |
| ENSMUSG Lrp1b     | 0        | 0.002841 | 0        | 0        | 0        | 0         |
| ENSMUSG Hsd3b5    | 0        | 0        | 0.032719 | 0        | 0        | 0         |
| ENSMUSG Atp13a4   | 4.2991   | 4.212645 | 3.54754  | 2.04237  | 2.505265 | 2.008382  |
| ENSMUSG Sbn01     | 11.97796 | 12.02971 | 10.57863 | 11.99054 | 13.51113 | 12.010403 |
| ENSMUSG Spry1     | 43.4215  | 36.02989 | 37.72654 | 25.35295 | 23.26328 | 22.803252 |
| ENSMUSG Ldhb      | 79.44346 | 100.9741 | 68.05434 | 90.04278 | 85.87218 | 94.175479 |
| ENSMUSG Golt1b    | 9.983449 | 9.303293 | 9.360519 | 10.01109 | 10.90799 | 10.145081 |
| ENSMUSG Gys2      | 0        | 0.117257 | 0        | 0.08894  | 0        | 0         |
| ENSMUSG Recql     | 10.43332 | 10.17899 | 9.836666 | 8.557332 | 7.812713 | 7.612571  |
| ENSMUSG Thap1     | 3.179278 | 3.453499 | 3.848    | 3.315572 | 3.325897 | 3.392375  |
| ENSMUSG Syn1      | 0.204413 | 0.208887 | 0.268668 | 1.742319 | 2.040861 | 2.401607  |
| ENSMUSG Lipt1     | 2.017143 | 2.251846 | 2.231461 | 2.19728  | 1.484836 | 1.955623  |
| ENSMUSG Abcc9     | 2.276657 | 2.055603 | 1.344123 | 1.804003 | 2.062825 | 1.690926  |
| ENSMUSG Pappa2    | 0.070625 | 0.250822 | 0.122806 | 0.040423 | 0.09419  | 0.048553  |
| ENSMUSG Gm7276    | 0        | 0        | 0        | 0        | 0        | 0         |
| ENSMUSG PsmD10    | 9.503574 | 10.15595 | 10.21712 | 11.39169 | 10.75076 | 12.329739 |
| ENSMUSG Col4a2    | 111.8373 | 94.01083 | 109.2651 | 73.68512 | 80.7767  | 78.189835 |
| ENSMUSG Vmn2r34   | 0        | 0        | 0        | 0        | 0        | 0         |
| ENSMUSG Vmn2r42   | 0        | 0        | 0        | 0        | 0        | 0         |
| ENSMUSG Vmn2r30   | 0        | 0        | 0        | 0        | 0        | 0         |
| ENSMUSG Vwce      | 0        | 0.02616  | 0        | 0        | 0.022041 | 0         |
| ENSMUSG Olfr1173  | 0        | 0        | 0        | 0        | 0        | 0         |
| ENSMUSG 4930503B2 | 0.116997 | 0.2236   | 0        | 0        | 0.033479 | 0.088818  |
| ENSMUSG Igsf1     | 0.123632 | 0.299858 | 0.040123 | 0.124539 | 0.192351 | 0.057535  |
| ENSMUSG Stk26     | 3.159357 | 3.308129 | 2.93468  | 3.597346 | 2.78549  | 3.184463  |
| ENSMUSG Tepp      | 0.717671 | 0.70751  | 1.097094 | 0.469437 | 0.271671 | 0.3179    |
| ENSMUSG 1700080O  | 0        | 0        | 0        | 0        | 0        | 0         |

|                  |          |          |          |          |          |           |
|------------------|----------|----------|----------|----------|----------|-----------|
| ENSMUSG Gpc4     | 8.83042  | 7.341273 | 8.916145 | 6.573257 | 7.058534 | 6.843898  |
| ENSMUSG Rsrc1    | 7.380087 | 7.442309 | 7.839694 | 7.329906 | 6.655508 | 7.235802  |
| ENSMUSG Morc2a   | 9.544819 | 9.20353  | 9.407184 | 7.888808 | 7.643571 | 8.23851   |
| ENSMUSG Rtbdn    | 0        | 0        | 0.009385 | 0.05153  | 0        | 0         |
| ENSMUSG Nog      | 0.386712 | 0.22195  | 0.129169 | 0.029362 | 0.106839 | 0.223305  |
| ENSMUSG Esp1     | 0        | 0        | 0        | 0        | 0        | 0         |
| ENSMUSG Rnf122   | 6.944826 | 6.491643 | 6.324102 | 4.962392 | 4.447978 | 4.836669  |
| ENSMUSG Myof     | 25.74925 | 22.54098 | 21.82997 | 38.6792  | 39.92501 | 45.823805 |
| ENSMUSG Igfbp2   | 87.00734 | 53.39785 | 111.8578 | 55.3169  | 55.89782 | 66.27076  |
| ENSMUSG Uts2r    | 0        | 0        | 0        | 0        | 0        | 0         |
| ENSMUSG Trim40   | 0        | 0.080003 | 0.143517 | 0.035526 | 0        | 0.080953  |
| ENSMUSG Pon3     | 69.02291 | 78.82328 | 54.91606 | 78.37322 | 78.9674  | 77.080057 |
| ENSMUSG Asns     | 10.80036 | 11.4552  | 11.39188 | 8.87304  | 8.157736 | 9.15321   |
| ENSMUSG Dync1i1  | 0.111198 | 0.161073 | 0        | 0        | 0.014081 | 0         |
| ENSMUSG Dlx5     | 0        | 0        | 0.035615 | 0        | 0        | 0         |
| ENSMUSG Dlx6     | 0        | 0        | 0        | 0        | 0        | 0         |
| ENSMUSG Usp16    | 15.30362 | 14.51897 | 16.1844  | 14.30435 | 14.04252 | 13.99979  |
| ENSMUSG Btbdb3   | 32.38232 | 31.22784 | 29.06629 | 19.30934 | 24.0255  | 19.148146 |
| ENSMUSG Bach1    | 16.86745 | 17.3682  | 15.16502 | 14.28537 | 14.62154 | 13.621212 |
| ENSMUSG Cct8     | 40.65939 | 43.23899 | 47.24939 | 42.82035 | 42.35802 | 43.884159 |
| ENSMUSG Map3k7cl | 1.326578 | 1.117435 | 1.700355 | 3.064244 | 3.158231 | 2.675272  |
| ENSMUSG Rps29    | 138.2366 | 147.4293 | 172.1423 | 201.6896 | 147.5173 | 170.4044  |
| ENSMUSG Msl1     | 33.19489 | 31.39127 | 31.944   | 27.58029 | 27.96667 | 27.589388 |
| ENSMUSG Prkch    | 43.15444 | 39.34993 | 42.77205 | 24.75147 | 28.47524 | 24.380498 |
| ENSMUSG Sncb     | 0        | 0        | 0        | 0.038255 | 0.097423 | 0         |
| ENSMUSG Glrx5    | 6.343577 | 6.163403 | 6.570698 | 4.968354 | 5.704051 | 6.914216  |
| ENSMUSG Mnat1    | 7.896608 | 7.291416 | 7.602767 | 5.646725 | 6.108282 | 5.753021  |
| ENSMUSG Filip1   | 3.991608 | 3.845708 | 2.53612  | 2.347458 | 2.42342  | 2.830464  |
| ENSMUSG Mlh1     | 4.095377 | 4.352913 | 3.5126   | 4.559032 | 3.979445 | 4.159768  |
| ENSMUSG Nradd    | 6.465517 | 6.420114 | 6.21866  | 5.787858 | 5.603503 | 5.933315  |
| ENSMUSG Pth1r    | 0.643102 | 0.967592 | 0.803014 | 1.192733 | 1.153459 | 0.850833  |
| ENSMUSG Prss44   | 0        | 0        | 0        | 0        | 0.026104 | 0         |
| ENSMUSG Tdgf1    | 0.143248 | 0.588059 | 0.387317 | 0.195633 | 0.15693  | 0.151677  |
| ENSMUSG Lrrc2    | 0.607061 | 1.331045 | 0.53783  | 0.564223 | 0.64409  | 0.39014   |
| ENSMUSG Ltf      | 0.830056 | 8.474032 | 0.524512 | 22.38614 | 18.74097 | 22.60033  |
| ENSMUSG Lrrfip2  | 33.28542 | 27.69367 | 28.97882 | 24.18528 | 23.67988 | 24.740027 |
| ENSMUSG Bhmt2    | 0        | 0        | 0        | 0        | 0        | 0         |
| ENSMUSG Ccdc115  | 11.429   | 10.5944  | 12.71956 | 13.21308 | 12.89136 | 12.115188 |
| ENSMUSG Vwa1     | 1.347515 | 1.456853 | 1.336568 | 1.362494 | 1.343896 | 1.908359  |
| ENSMUSG Prr15    | 2.60245  | 3.690452 | 2.212158 | 3.009063 | 3.210836 | 2.98233   |
| ENSMUSG Klhdc8a  | 1.341106 | 1.193629 | 1.308519 | 1.842232 | 1.691733 | 2.110829  |
| ENSMUSG Hnrnpa0  | 50.7515  | 34.0173  | 39.91767 | 35.97274 | 42.25884 | 42.802322 |
| ENSMUSG Prrg2    | 12.05167 | 13.6448  | 11.88057 | 13.43862 | 13.50411 | 13.987207 |
| ENSMUSG Spocd1   | 0        | 0        | 0.043718 | 0        | 0        | 0.032542  |
| ENSMUSG Aldh16a1 | 7.744016 | 7.625147 | 7.36924  | 8.619557 | 7.372572 | 9.047649  |
| ENSMUSG Clip4    | 9.17637  | 9.690706 | 7.579275 | 11.43492 | 7.997455 | 13.198361 |
| ENSMUSG Bsph1    | 0        | 0        | 0        | 0        | 0        | 0         |
| ENSMUSG Sult2a4  | 0        | 0        | 0        | 0        | 0        | 0         |
| ENSMUSG Ndc80    | 0.364017 | 0.456969 | 0.638711 | 1.423715 | 1.745638 | 1.529809  |
| ENSMUSG Sult2a3  | 0        | 0        | 0        | 0        | 0        | 0         |
| ENSMUSG Smchd1   | 9.654382 | 9.414178 | 7.978412 | 9.313018 | 10.54739 | 9.914807  |
| ENSMUSG Emilin2  | 5.936652 | 5.478113 | 8.087539 | 7.87818  | 8.904322 | 9.90631   |
| ENSMUSG Lpin2    | 54.48881 | 58.82719 | 47.94335 | 33.37292 | 37.03849 | 28.624345 |
| ENSMUSG Wiz      | 14.60265 | 14.02054 | 12.61811 | 11.60313 | 11.51598 | 13.028859 |
| ENSMUSG Gm7735   | 0        | 0        | 0        | 0        | 0        | 0         |
| ENSMUSG 1110057P | 0        | 0        | 0        | 0        | 0        | 0         |
| ENSMUSG Ffar1    | 0.229151 | 0.225717 | 0.196731 | 0.298432 | 0.431561 | 0.424047  |
| ENSMUSG Zfp507   | 4.379814 | 4.221599 | 3.615562 | 3.643992 | 3.570011 | 4.013537  |
| ENSMUSG Olfr867  | 0        | 0        | 0        | 0        | 0        | 0         |
| ENSMUSG Rin3     | 38.76241 | 34.13011 | 38.73623 | 24.9975  | 24.72549 | 24.221514 |
| ENSMUSG Ptp4a2   | 57.81336 | 59.62893 | 61.63638 | 63.03084 | 62.16124 | 58.666292 |
| ENSMUSG Hist1h1b | 0.220677 | 0.052752 | 0.053205 | 0        | 0.052766 | 0.130641  |
| ENSMUSG Olfr1308 | 0        | 0        | 0        | 0        | 0        | 0         |
| ENSMUSG Olfr1305 | 0        | 0        | 0        | 0        | 0        | 0         |

|                    |          |          |          |          |          |           |
|--------------------|----------|----------|----------|----------|----------|-----------|
| ENSMUSG Nkx2-6     | 0        | 0        | 0        | 0        | 0        | 0         |
| ENSMUSG Cpa3       | 0.503234 | 0.3034   | 0.507042 | 1.802611 | 0.974434 | 1.02046   |
| ENSMUSG Aif1l      | 1.626589 | 1.771215 | 1.844992 | 2.66607  | 2.572846 | 3.040787  |
| Mus_musc Mus_musc  | 0        | 0        | 0        | 0.180678 | 0        | 0         |
| Mus_musc Mus_musc  | 0.218612 | 0        | 0        | 0        | 0        | 0.100392  |
| ENSMUSG Prdm11     | 5.428268 | 4.958316 | 4.939526 | 3.642667 | 3.464949 | 3.422926  |
| ENSMUSG Rae1       | 16.19798 | 13.78749 | 16.18969 | 13.36625 | 15.05539 | 16.649029 |
| Mus_musc Mus_musc  | 0        | 0        | 0        | 0.19073  | 0        | 0.187308  |
| ENSMUSG Gm10803    | 0        | 0        | 0        | 0        | 0        | 0         |
| ENSMUSG Fam209     | 0.041755 | 0.079808 | 0.045259 | 0.047618 | 0.063657 | 0.116106  |
| ENSMUSG Tpd52      | 16.73509 | 19.84197 | 15.7026  | 18.42764 | 24.60298 | 29.236406 |
| ENSMUSG Stmn2      | 30.16671 | 32.73109 | 34.72873 | 20.87375 | 22.54096 | 22.098974 |
| ENSMUSG Rtf2       | 32.72967 | 34.26717 | 33.49077 | 33.12602 | 34.79929 | 34.808868 |
| ENSMUSG Accsl      | 0        | 0        | 0        | 0        | 0        | 0         |
| ENSMUSG Eps8l3     | 0.081058 | 0.128829 | 0.047385 | 0.175932 | 0.147479 | 0.079968  |
| ENSMUSG Nlrp4a     | 0        | 0        | 0        | 0        | 0        | 0         |
| ENSMUSG Bace2      | 2.078478 | 2.030854 | 1.923124 | 2.594607 | 2.410678 | 2.499041  |
| ENSMUSG Kazn       | 9.955482 | 8.242763 | 9.281456 | 6.942645 | 5.083252 | 5.531245  |
| ENSMUSG Olfr271-ps | 0        | 0        | 0        | 0        | 0        | 0         |
| ENSMUSG Defa27     | 0        | 0        | 0        | 0        | 0        | 0         |
| ENSMUSG 4931429L1  | 0        | 0        | 0        | 0        | 0        | 0         |
| ENSMUSG Rims3      | 1.052537 | 1.321356 | 0.928253 | 1.255459 | 0.953941 | 0.760908  |
| ENSMUSG Epg5       | 4.299844 | 4.150749 | 3.833359 | 3.971947 | 3.590199 | 4.156397  |
| ENSMUSG Olfr638    | 0        | 0        | 0        | 0        | 0        | 0         |
| ENSMUSG Gm21541    | 0        | 0.294447 | 0.430135 | 0.682121 | 0.12693  | 0         |
| ENSMUSG Fam205a2   | 0.006624 | 0.019385 | 0.026729 | 0.019916 | 0.011069 | 0.007012  |
| ENSMUSG B4gat1     | 17.59762 | 15.20087 | 18.7417  | 12.82153 | 14.35256 | 13.548867 |
| ENSMUSG Zfp768     | 9.984107 | 9.761594 | 9.565457 | 8.816768 | 9.291397 | 8.183715  |
| ENSMUSG Cfh        | 58.6213  | 66.89452 | 57.38787 | 70.23941 | 72.44141 | 69.093264 |
| ENSMUSG Cdc73      | 5.006633 | 5.81086  | 4.632344 | 4.528768 | 4.311877 | 4.212441  |
| ENSMUSG Rgs2       | 21.76806 | 14.67389 | 23.13536 | 20.7289  | 22.98479 | 15.492732 |
| Mus_musc Mus_musc  | 0        | 0.097664 | 0        | 0.507364 | 0.575044 | 0.262265  |
| ENSMUSG F13b       | 0        | 0        | 0        | 0        | 0.01648  | 0.020439  |
| ENSMUSG Calm1      | 175.8172 | 180.1187 | 183.493  | 165.1068 | 168.3022 | 173.06426 |
| Mus_musc Mus_musc  | 0.38523  | 0.121935 | 0.671945 | 0.755009 | 0.573026 | 0.258401  |
| ENSMUSG Hsp90b1    | 182.8436 | 196.8128 | 229.8965 | 434.2218 | 469.9695 | 438.39395 |
| ENSMUSG Sowahc     | 13.08807 | 13.848   | 12.69128 | 14.05547 | 14.49544 | 15.268349 |
| Mus_musc Mus_musc  | 0        | 0.154309 | 0        | 0        | 0        | 0         |
| ENSMUSG Pigv       | 5.02281  | 5.383188 | 5.146765 | 4.228247 | 5.112286 | 4.194236  |
| Mus_musc Mus_musc  | 0.389731 | 0.565419 | 0.175934 | 0.385846 | 0.457598 | 0.180962  |
| Mus_musc Mus_musc  | 0        | 0        | 0        | 0        | 0        | 0.047098  |
| Mus_musc Mus_musc  | 2.901079 | 3.152493 | 2.754151 | 3.653372 | 3.777553 | 4.270838  |
| Mus_musc Mus_musc  | 0        | 0        | 0.377332 | 0        | 0.40609  | 0.026216  |
| Mus_musc Mus_musc  | 0        | 0        | 0.168936 | 0        | 0        | 0         |
| Mus_musc Mus_musc  | 0        | 0        | 0        | 0        | 0.373385 | 0.104709  |
| Mus_musc Mus_musc  | 0        | 0        | 0        | 0.174016 | 0        | 0         |
| Mus_musc Mus_musc  | 0        | 0        | 0        | 0        | 0.286403 | 0         |
| Mus_musc Mus_musc  | 0        | 0        | 0        | 0        | 0        | 0         |
| Mus_musc Mus_musc  | 0.281133 | 0.412838 | 0.157691 | 0.5827   | 0.511624 | 0.680676  |
| ENSMUSG Saal1      | 1.913343 | 2.058958 | 1.661777 | 1.636646 | 2.011918 | 1.985982  |
| ENSMUSG Tph2       | 0        | 0        | 0        | 0        | 0        | 0         |
| ENSMUSG Olfr798    | 0        | 0        | 0        | 0        | 0        | 0         |
| Mus_musc Mus_musc  | 1.240519 | 0.862923 | 1.110786 | 2.583491 | 2.165133 | 2.12727   |
| Mus_musc Mus_musc  | 0.555685 | 0.311278 | 0.666183 | 0.270287 | 0.409153 | 0.214733  |
| ENSMUSG Pym1       | 9.002839 | 8.787893 | 9.667366 | 9.500334 | 8.520755 | 11.527814 |
| Mus_musc Mus_musc  | 0        | 0.237891 | 0.422107 | 0        | 0.156674 | 0.080013  |
| ENSMUSG Ccr1l1     | 0        | 0        | 0        | 0.009104 | 0.038908 | 0.071084  |
| Mus_musc Mus_musc  | 0        | 0.116714 | 0        | 0        | 0        | 0         |
| Mus_musc Mus_musc  | 0        | 0        | 0.196662 | 0.261024 | 0        | 0         |
| ENSMUSG Vmn1r184   | 0        | 0        | 0        | 0        | 0        | 0         |
| ENSMUSG Fbrsl1     | 8.439154 | 7.592303 | 7.797506 | 6.952995 | 8.050072 | 8.956242  |
| ENSMUSG C130073F   | 0        | 0        | 0        | 0        | 0        | 0         |
| ENSMUSG 9930021J0  | 6.851989 | 7.776322 | 6.375626 | 5.663417 | 6.104908 | 5.863773  |
| ENSMUSG Patl1      | 12.62711 | 11.51952 | 12.11995 | 10.05829 | 9.756431 | 10.825139 |



|                    |          |          |          |          |          |           |
|--------------------|----------|----------|----------|----------|----------|-----------|
| Mus_musc Mus_musc  | 0.133502 | 0.275699 | 0        | 0        | 0        | 0         |
| Mus_musc Mus_musc  | 0        | 0        | 0.3253   | 0.423074 | 0.564477 | 0.191821  |
| Mus_musc Mus_musc  | 0.252089 | 0.31587  | 0.681239 | 0.418108 | 0.336629 | 0.386986  |
| ENSMUSG Cct3       | 42.88091 | 51.30949 | 51.06808 | 42.72177 | 45.79864 | 46.907113 |
| ENSMUSG Smg5       | 14.75696 | 15.69276 | 15.83951 | 15.41772 | 16.88077 | 16.916327 |
| ENSMUSG Olfr1274-1 | 0        | 0        | 0        | 0        | 0        | 0         |
| ENSMUSG Glmp       | 17.72542 | 16.91979 | 17.58159 | 20.16735 | 20.84172 | 22.62318  |
| ENSMUSG Mef2d      | 23.49884 | 21.48506 | 23.02983 | 18.68446 | 17.76002 | 19.25366  |
| ENSMUSG Gprin3     | 2.786401 | 3.988503 | 2.18126  | 4.257438 | 3.621035 | 3.694879  |
| ENSMUSG Insm2      | 0        | 0        | 0        | 0        | 0        | 0         |
| ENSMUSG Zpbp2      | 0.103853 | 0        | 0        | 0.275917 | 0.203717 | 0.191428  |
| Mus_musc Mus_musc  | 0        | 0        | 0        | 0        | 0        | 0.184186  |
| Mus_musc Mus_musc  | 0        | 0        | 0        | 0.236855 | 0.172246 | 0.124253  |
| Mus_musc Mus_musc  | 0        | 0        | 0        | 0.080938 | 0.453851 | 0.263001  |
| Mus_musc Mus_musc  | 0        | 0        | 0        | 0.01989  | 0.279342 | 0.26433   |
| Mus_musc Mus_musc  | 0        | 0        | 0        | 0.231852 | 0        | 0.100416  |
| ENSMUSG Gm45902    | 0.932821 | 0.659577 | 0.693068 | 0.60184  | 0.452899 | 0.7093    |
| ENSMUSG Ywhag      | 46.10055 | 52.02436 | 53.54441 | 47.20277 | 47.16763 | 52.057106 |
| ENSMUSG 4930447Fc  | 0        | 0        | 0        | 0        | 0        | 0         |
| ENSMUSG Zfp687     | 6.738593 | 7.018495 | 6.729771 | 7.072945 | 6.851838 | 7.428106  |
| ENSMUSG Aym1       | 0        | 0        | 0        | 0        | 0        | 0         |
| ENSMUSG Fpgt       | 5.042802 | 5.751376 | 5.082107 | 4.343603 | 4.255609 | 4.499291  |
| ENSMUSG Srcap      | 17.25382 | 10.57959 | 8.77559  | 10.69621 | 12.65651 | 9.797554  |
| ENSMUSG Bend7      | 16.90109 | 16.45495 | 13.02044 | 11.51327 | 11.75156 | 12.102985 |
| ENSMUSG Gm7075     | 0        | 0        | 0        | 0        | 0        | 0         |
| Mus_musc Mus_musc  | 0        | 0.224268 | 0.080967 | 0.019611 | 0.036275 | 0.025608  |
| Mus_musc Mus_musc  | 0        | 0        | 0        | 0        | 0        | 0         |
| ENSMUSG Pdf        | 10.32071 | 8.75914  | 8.531108 | 7.042298 | 10.57062 | 8.802315  |
| ENSMUSG Cd70       | 0        | 0        | 0        | 0        | 0        | 0         |
| ENSMUSG CN725425   | 0        | 0        | 0        | 0        | 0        | 0         |
| ENSMUSG 1700025C   | 0        | 0        | 0        | 0        | 0        | 0.033322  |
| ENSMUSG 9230113P   | 0        | 0        | 0        | 0        | 0        | 0         |
| ENSMUSG Cpt1b      | 0.398075 | 1.786261 | 0.191772 | 0.390112 | 0.136708 | 0.142687  |
| ENSMUSG Syce3      | 0        | 0        | 0        | 0        | 0        | 0         |
| ENSMUSG Trip10     | 38.51594 | 37.98749 | 41.45124 | 24.26192 | 25.03741 | 25.6429   |
| ENSMUSG Trim65     | 8.123651 | 10.92807 | 9.772888 | 7.075846 | 7.280507 | 7.257975  |
| Mus_musc Mus_musc  | 1.137888 | 0.533219 | 0.389644 | 0.514104 | 0.261594 | 0.376274  |
| Mus_musc Mus_musc  | 0.496992 | 0.347818 | 0.460393 | 0.135554 | 0.208327 | 0.658293  |
| ENSMUSG Pcp4       | 0.204291 | 0        | 0.180285 | 0.591584 | 0.52523  | 0.171263  |
| ENSMUSG Yeats2     | 6.258689 | 6.504606 | 5.87602  | 5.210319 | 5.676137 | 5.181489  |
| ENSMUSG Clvs1      | 0        | 0        | 0.009244 | 0.014661 | 0.007161 | 0         |
| ENSMUSG Arhgap11a  | 1.611484 | 1.275978 | 1.373795 | 2.924731 | 3.359066 | 3.632621  |
| ENSMUSG Gm3045     | 0        | 0        | 0        | 0        | 0        | 0         |
| ENSMUSG Slc38a5    | 9.629573 | 8.23068  | 11.09678 | 6.407515 | 7.107399 | 6.018694  |
| Mus_musc Mus_musc  | 0.907743 | 0.935214 | 0.657189 | 0.504682 | 0.517635 | 0.357282  |
| ENSMUSG Jmjd6      | 19.24676 | 21.41439 | 24.11404 | 12.37852 | 13.68022 | 17.052355 |
| Mus_musc Mus_musc  | 0        | 0        | 0        | 0        | 0.071444 | 0         |
| ENSMUSG Olfr919    | 0        | 0        | 0        | 0        | 0        | 0         |
| ENSMUSG Gjc3       | 0        | 0.03825  | 0.029971 | 0.022567 | 0.00989  | 0.027442  |
| Mus_musc Mus_musc  | 0        | 0        | 0        | 0.348032 | 0        | 0         |
| ENSMUSG Med4       | 16.04714 | 18.22337 | 18.02039 | 13.78174 | 15.17719 | 14.028113 |
| ENSMUSG ltm2b      | 829.9078 | 822.8357 | 942.1248 | 662.7751 | 646.1174 | 637.89998 |
| ENSMUSG Rcbtb2     | 12.64516 | 12.62708 | 13.27431 | 16.67503 | 15.28052 | 18.393412 |
| ENSMUSG Rb1        | 11.75819 | 11.06111 | 10.94513 | 11.72377 | 11.66163 | 10.777798 |
| ENSMUSG Numa1      | 42.55789 | 41.38412 | 39.62278 | 34.84584 | 36.6443  | 34.996912 |
| ENSMUSG Gfra2      | 10.08315 | 9.627174 | 13.51332 | 9.425352 | 9.127868 | 8.120298  |
| ENSMUSG Dok2       | 5.966576 | 4.370794 | 12.1187  | 16.51467 | 14.01396 | 15.628229 |
| ENSMUSG Fgf17      | 0        | 0        | 0        | 0.025036 | 0        | 0.02759   |
| ENSMUSG Xpo7       | 8.180024 | 10.1139  | 5.725609 | 5.082871 | 5.587375 | 5.039714  |
| ENSMUSG Khl26      | 12.6515  | 11.48589 | 12.80281 | 10.75994 | 10.05224 | 10.888194 |
| Mus_musc Mus_musc  | 0.41957  | 0.292008 | 0.444051 | 0        | 0        | 0.223071  |
| Mus_musc Mus_musc  | 0.191173 | 0.280939 | 0.151131 | 0.309785 | 0.478982 | 0.167377  |
| Mus_musc Mus_musc  | 3.85171  | 4.098913 | 4.431801 | 3.228383 | 4.779244 | 4.646291  |
| Mus_musc Mus_musc  | 7.162338 | 6.740138 | 5.961061 | 6.849276 | 7.089477 | 6.991764  |

|                   |          |          |          |          |          |           |
|-------------------|----------|----------|----------|----------|----------|-----------|
| Mus_musc Mus_musc | 0        | 0.047953 | 0.083485 | 0.185521 | 0.132727 | 0.133924  |
| Mus_musc Mus_musc | 0.798848 | 0.738483 | 0.854537 | 1.141271 | 0.991119 | 0.721672  |
| Mus_musc Mus_musc | 0.30085  | 0.478744 | 0.336183 | 0.729128 | 0.67536  | 0.238566  |
| ENSMUSG Gm2564    | 0        | 0        | 0.105442 | 0.113555 | 0        | 0         |
| Mus_musc Mus_musc | 0        | 0.154309 | 0        | 0        | 0        | 0         |
| ENSMUSG 1700034J0 | 0        | 0.014471 | 0        | 0        | 0        | 0         |
| ENSMUSG Cd209c    | 0.518724 | 0.952969 | 0.767623 | 0.319889 | 0.263015 | 0.154716  |
| ENSMUSG Kcns1     | 0.020245 | 0        | 0.048712 | 0.038881 | 0        | 0         |
| ENSMUSG lkzf5     | 10.50049 | 10.61417 | 8.811456 | 7.75747  | 7.480957 | 7.466183  |
| Mus_musc Mus_musc | 0        | 0        | 0        | 0.156442 | 0        | 0         |
| ENSMUSG Vmn2r52   | 0        | 0        | 0        | 0        | 0        | 0         |
| ENSMUSG Gon7      | 1.850713 | 3.375491 | 3.110421 | 3.824263 | 3.82815  | 3.728785  |
| ENSMUSG Gm8857    | 0        | 0        | 0        | 0.270973 | 0.085384 | 0         |
| ENSMUSG Gm3646    | 0        | 0        | 0        | 0        | 0        | 0         |
| Mus_musc Mus_musc | 0.265296 | 0.129045 | 0        | 0.325194 | 0.239691 | 0.567535  |
| Mus_musc Mus_musc | 0        | 0.290259 | 0        | 0        | 0.509305 | 0         |
| Mus_musc Mus_musc | 0.103417 | 0        | 0.07363  | 0.373306 | 0.182692 | 0.431141  |
| Mus_musc Mus_musc | 0        | 0        | 0        | 0        | 0        | 0.138281  |
| Mus_musc Mus_musc | 0.100017 | 0.303694 | 0        | 0.057124 | 0.467866 | 0.164312  |
| Mus_musc Mus_musc | 1.840621 | 2.001739 | 2.51424  | 1.372207 | 1.480859 | 1.195644  |
| ENSMUSG Chd4      | 46.9857  | 45.66982 | 44.27406 | 46.12963 | 47.2021  | 48.178422 |
| ENSMUSG Pkd2l2    | 2.359267 | 2.600108 | 2.587275 | 3.021416 | 2.289704 | 2.38063   |
| ENSMUSG Pgam1     | 56.01716 | 55.56541 | 57.13119 | 72.55386 | 75.37809 | 81.430626 |
| ENSMUSG Slc24a3   | 3.242665 | 4.451626 | 3.585204 | 4.176661 | 3.884609 | 3.119034  |
| ENSMUSG Srp19     | 25.46981 | 20.70618 | 23.44308 | 32.19071 | 28.03164 | 26.346921 |
| Mus_musc Mus_musc | 0        | 0.305563 | 0        | 0        | 0        | 0         |
| ENSMUSG Nsrp1     | 7.12871  | 6.301465 | 7.690012 | 6.699454 | 6.46983  | 6.65615   |
| ENSMUSG Gm7544    | 0        | 0        | 0        | 0.006305 | 0        | 0         |
| ENSMUSG Mex3b     | 2.279356 | 2.162492 | 2.599703 | 2.601684 | 2.902189 | 2.413306  |
| ENSMUSG Vmn1r10   | 0        | 0        | 0        | 0        | 0        | 0         |
| ENSMUSG Paip1     | 24.35562 | 27.85173 | 27.10762 | 22.90065 | 21.82857 | 22.799528 |
| ENSMUSG Nnt       | 15.65652 | 15.86247 | 13.86868 | 14.72335 | 14.97738 | 14.634421 |
| ENSMUSG Vmn1r46   | 0        | 0        | 0        | 0        | 0        | 0         |
| ENSMUSG Med9      | 12.77213 | 11.33795 | 11.272   | 10.72085 | 10.21898 | 12.065161 |
| ENSMUSG Cadps2    | 14.82047 | 11.84638 | 10.72128 | 10.96878 | 6.90754  | 9.91537   |
| ENSMUSG Olfr197   | 0        | 0        | 0        | 0        | 0        | 0         |
| ENSMUSG Olfr1432  | 0        | 0        | 0        | 0        | 0        | 0         |
| ENSMUSG Metrnl    | 7.880891 | 7.450322 | 8.630214 | 16.16656 | 14.66388 | 20.554653 |
| ENSMUSG Rpl39l    | 0        | 0.094886 | 0        | 0        | 0.069575 | 0         |
| ENSMUSG Atf7ip2   | 0        | 0.016664 | 0        | 0        | 0        | 0         |
| ENSMUSG Tbc1d25   | 5.429584 | 4.769204 | 4.952728 | 3.838147 | 4.613437 | 4.226745  |
| ENSMUSG Gm49380   | 0.034288 | 0.012816 | 0        | 0.02193  | 0        | 0.094084  |
| ENSMUSG Ciz1      | 18.13648 | 18.18637 | 21.10945 | 16.8627  | 18.15972 | 16.851791 |
| ENSMUSG Dagl1b    | 5.019742 | 4.104899 | 5.133002 | 10.87692 | 9.635893 | 11.46392  |
| ENSMUSG Gm21708   | 0        | 0        | 0        | 0        | 0        | 0         |
| ENSMUSG Gm21964   | 0        | 0        | 0        | 0        | 0        | 0         |
| ENSMUSG C130074G  | 39.69904 | 40.44296 | 37.9321  | 28.80068 | 27.02149 | 25.583319 |
| ENSMUSG Gpr132    | 2.436138 | 2.026508 | 3.896893 | 3.932568 | 3.360731 | 3.991847  |
| ENSMUSG Kif13b    | 8.911414 | 8.947995 | 9.032812 | 7.792438 | 8.321701 | 8.380642  |
| ENSMUSG Olfr121   | 0        | 0        | 0        | 0        | 0        | 0         |
| ENSMUSG Ap5s1     | 5.857192 | 5.824622 | 6.130017 | 7.710239 | 8.31826  | 8.482094  |
| ENSMUSG Gm10073   | 3.770485 | 4.321904 | 6.030271 | 5.144879 | 6.164611 | 5.328775  |
| ENSMUSG Cenpb     | 73.22035 | 68.70696 | 63.8388  | 54.78861 | 52.84115 | 51.716988 |
| ENSMUSG Kif26a    | 10.4572  | 9.069171 | 8.931174 | 6.224008 | 5.696221 | 5.81659   |
| ENSMUSG Efcc1     | 4.141421 | 3.499818 | 3.347008 | 2.931813 | 3.165198 | 3.854104  |
| ENSMUSG Myf6      | 0        | 0        | 0        | 0        | 0        | 0         |
| ENSMUSG H2-Q4     | 133.4261 | 101.9648 | 335.4084 | 200.2937 | 121.6714 | 150.97328 |
| ENSMUSG Hsd17b13  | 0        | 0        | 0        | 0        | 0        | 0         |
| ENSMUSG Myocos    | 0        | 0        | 0        | 0        | 0        | 0         |
| ENSMUSG Dnah6     | 3.516999 | 4.281931 | 1.984319 | 4.948774 | 5.116587 | 5.202358  |
| ENSMUSG Gm10118   | 0        | 0        | 0        | 0        | 0        | 0         |
| ENSMUSG Rhpn2     | 12.79632 | 11.36683 | 12.22534 | 8.823196 | 7.983469 | 9.558346  |
| ENSMUSG Slc7a10   | 10.44194 | 10.29005 | 13.69989 | 8.28959  | 5.638138 | 4.859147  |
| ENSMUSG Tex28     | 0        | 0        | 0        | 0        | 0        | 0         |

|                   |          |          |          |          |          |           |
|-------------------|----------|----------|----------|----------|----------|-----------|
| ENSMUSG Arid5a    | 5.035265 | 5.006349 | 6.985844 | 5.554502 | 5.778093 | 6.690674  |
| ENSMUSG Tbc1d16   | 10.99009 | 11.76757 | 10.69347 | 11.58976 | 11.81508 | 12.882629 |
| ENSMUSG Deup1     | 0.638492 | 0.622255 | 0.429049 | 1.985432 | 2.122214 | 2.399279  |
| ENSMUSG Angel1    | 2.59984  | 1.95075  | 2.092834 | 2.026588 | 2.081013 | 1.998875  |
| ENSMUSG Cep5711   | 1.942557 | 1.986004 | 1.864907 | 2.215611 | 2.091568 | 2.201498  |
| ENSMUSG Fuca2     | 14.07088 | 16.40994 | 16.20048 | 16.74568 | 19.93481 | 19.410555 |
| ENSMUSG Plagl1    | 10.17949 | 8.62289  | 11.33694 | 5.547781 | 4.93027  | 6.845606  |
| ENSMUSG Zc2hc1b   | 0        | 0        | 0        | 0        | 0        | 0         |
| ENSMUSG Ltv1      | 7.155714 | 6.753969 | 8.576177 | 6.480917 | 7.266819 | 8.506044  |
| ENSMUSG Cd164     | 110.0923 | 106.6383 | 102.9818 | 89.21066 | 93.38698 | 87.657767 |
| ENSMUSG Lipe      | 21.45455 | 22.74927 | 30.06804 | 21.84774 | 18.46713 | 17.794414 |
| ENSMUSG Hcfc2     | 9.743285 | 10.27535 | 8.504704 | 8.566192 | 8.87013  | 7.746877  |
| ENSMUSG Col6a2    | 34.80078 | 34.13375 | 36.84772 | 54.32188 | 58.86124 | 64.843923 |
| ENSMUSG Nfyb      | 7.471983 | 8.267731 | 7.486725 | 8.050973 | 6.747523 | 7.113736  |
| ENSMUSG Pgs1      | 29.29967 | 32.46159 | 31.4746  | 28.83939 | 29.45431 | 30.787105 |
| ENSMUSG Gm4450    | 0        | 0.083576 | 0.093703 | 0.026196 | 0        | 0         |
| ENSMUSG Atpif1    | 55.38046 | 58.77407 | 71.16302 | 78.97124 | 70.89442 | 73.643008 |
| ENSMUSG Samd15    | 0.119296 | 0.138051 | 0.24364  | 0.160746 | 0.255428 | 0.346878  |
| ENSMUSG Cadps     | 0        | 0        | 0        | 0.018471 | 0.04075  | 0.00865   |
| ENSMUSG Fabp1     | 7.523978 | 9.221583 | 9.146687 | 0.708398 | 1.508619 | 0.706021  |
| ENSMUSG Pcdhgb7   | 3.73261  | 3.186417 | 2.743398 | 2.693496 | 2.107435 | 2.782178  |
| ENSMUSG Trmt13    | 2.099278 | 3.051212 | 2.130228 | 2.807401 | 2.094413 | 2.703928  |
| ENSMUSG Gtpbp6    | 13.72088 | 14.78788 | 17.04459 | 13.41062 | 13.37406 | 12.192219 |
| ENSMUSG Gm16451   | 0        | 0        | 0        | 0        | 0        | 0         |
| ENSMUSG Armcx2    | 8.417032 | 7.562239 | 7.19586  | 6.894905 | 7.285732 | 6.872815  |
| ENSMUSG Terf2ip   | 8.109014 | 8.4659   | 7.901229 | 7.551071 | 7.329746 | 6.507336  |
| ENSMUSG Mrpl47    | 3.417068 | 3.655583 | 3.162344 | 3.241842 | 3.319079 | 3.339226  |
| ENSMUSG Rapgef6   | 10.2685  | 10.67537 | 9.108055 | 10.41559 | 9.708743 | 9.939715  |
| ENSMUSG Fbxo34    | 6.561644 | 6.232551 | 5.201797 | 6.172023 | 5.953355 | 6.559151  |
| ENSMUSG H2-M11    | 0        | 0        | 0        | 0        | 0        | 0         |
| ENSMUSG S100a11   | 310.1397 | 319.6801 | 305.4376 | 296.6859 | 295.3078 | 331.40424 |
| ENSMUSG Luc7l3    | 23.48574 | 26.10135 | 29.64531 | 26.18341 | 20.87913 | 23.99642  |
| ENSMUSG Cacna1g   | 0.024    | 0.077366 | 0.051509 | 0.046644 | 0.046345 | 0.059169  |
| ENSMUSG Spata20   | 0.030635 | 0.014391 | 0.069902 | 0.039215 | 0        | 0         |
| ENSMUSG Ankrd40   | 58.11679 | 59.01539 | 57.75629 | 44.91259 | 42.91668 | 44.48204  |
| ENSMUSG Abcc3     | 10.32598 | 10.30474 | 8.632338 | 6.662648 | 6.65609  | 7.093885  |
| ENSMUSG Xylt2     | 8.955149 | 8.721118 | 9.116785 | 7.713638 | 7.605517 | 7.748746  |
| ENSMUSG Lrrc59    | 33.15979 | 32.65649 | 31.8401  | 39.83315 | 46.7738  | 49.389191 |
| ENSMUSG Hoxc5     | 0.115598 | 0.114188 | 0        | 0.040423 | 0.124355 | 0.035917  |
| ENSMUSG Cyt11     | 57.0742  | 62.25864 | 63.1549  | 36.29595 | 35.48953 | 35.679184 |
| ENSMUSG Rpl17     | 51.49739 | 50.43155 | 57.95153 | 60.50989 | 59.28836 | 60.669525 |
| ENSMUSG Gm10340   | 0        | 0        | 0        | 0        | 0.118824 | 0         |
| ENSMUSG Sphkap    | 0.175925 | 0.2523   | 0.133239 | 0.100901 | 0.149045 | 0.100722  |
| ENSMUSG Nhej1     | 1.673355 | 1.738141 | 0.979284 | 1.49525  | 2.110415 | 1.657152  |
| ENSMUSG T         | 0        | 0        | 0        | 0        | 0        | 0         |
| ENSMUSG Olr1      | 5.014733 | 4.208578 | 3.674882 | 10.82811 | 12.05062 | 11.657927 |
| ENSMUSG Tmem52b   | 0        | 0        | 0.017616 | 0        | 0.108498 | 0.031434  |
| ENSMUSG Gabarapl1 | 104.277  | 105.5871 | 102.4885 | 82.05878 | 82.43435 | 81.116591 |
| ENSMUSG Rad52     | 3.758939 | 3.274228 | 3.924568 | 3.643658 | 4.265639 | 4.284409  |
| ENSMUSG Klrc1     | 1.306632 | 0.719047 | 5.023369 | 1.811425 | 0.614842 | 0.852171  |
| ENSMUSG Klrd1     | 3.366469 | 1.994953 | 6.966602 | 2.523658 | 0.992448 | 1.962746  |
| ENSMUSG Adipor2   | 40.97272 | 44.38031 | 36.91695 | 35.18319 | 39.11622 | 38.745104 |
| ENSMUSG Mydgf     | 20.42203 | 20.64821 | 20.81145 | 25.26735 | 25.95379 | 27.415157 |
| ENSMUSG Ptk6      | 0.273255 | 0.456653 | 0.214639 | 0.354259 | 0.222523 | 0.233016  |
| ENSMUSG Dlgap1    | 0        | 0.044208 | 0.006171 | 0.034223 | 0.058117 | 0.019746  |
| ENSMUSG Ctnna3    | 0.149016 | 0.168677 | 0.158429 | 0.20242  | 0.201498 | 0.333256  |
| ENSMUSG Elovl3    | 0        | 0        | 0        | 0.03273  | 0        | 0         |
| ENSMUSG Ttl6      | 0.898748 | 1.02186  | 0.959536 | 1.120598 | 1.35802  | 1.328775  |
| ENSMUSG Nup205    | 5.584698 | 5.898612 | 5.572772 | 6.155197 | 6.218733 | 7.367637  |
| ENSMUSG Sult2b1   | 0.77595  | 0.573449 | 1.16808  | 0.627761 | 0.85245  | 1.113722  |
| ENSMUSG Car11     | 0.450682 | 0.947079 | 0.579286 | 0.814857 | 0.34488  | 0.651334  |
| ENSMUSG Nrep      | 38.13918 | 34.60318 | 27.82469 | 18.981   | 15.50027 | 15.000537 |
| ENSMUSG Alkbh6    | 14.73356 | 13.72329 | 17.41795 | 12.82645 | 13.80657 | 14.392233 |
| ENSMUSG Olfr617   | 0        | 0        | 0        | 0        | 0        | 0         |

|                   |          |          |          |          |          |           |
|-------------------|----------|----------|----------|----------|----------|-----------|
| ENSMUSG Epc2      | 13.55583 | 13.4405  | 12.40677 | 9.848031 | 10.47254 | 9.998739  |
| ENSMUSG Dll3      | 0        | 0        | 0        | 0        | 0.080154 | 0.123893  |
| ENSMUSG Sgms2     | 2.078179 | 2.140632 | 1.735994 | 1.496491 | 1.969446 | 2.707734  |
| ENSMUSG Paf1      | 32.45922 | 30.66567 | 33.15223 | 24.94226 | 27.44856 | 26.216146 |
| ENSMUSG Tmsb4x    | 1822.831 | 1736.314 | 2085.774 | 1930.574 | 1783.543 | 1820.2887 |
| ENSMUSG Helq      | 2.642309 | 2.14935  | 2.991202 | 2.120184 | 2.651313 | 2.200567  |
| ENSMUSG Upp2      | 0.063079 | 0.052322 | 0.028877 | 0.052691 | 0.022421 | 0         |
| ENSMUSG Amh       | 0.228088 | 0.045276 | 0.185526 | 0.133065 | 0.095358 | 0.22731   |
| ENSMUSG Cyp11b1   | 0        | 0        | 0        | 0        | 0        | 0         |
| ENSMUSG Cytip     | 12.1339  | 13.01841 | 12.75274 | 14.42077 | 13.83197 | 13.295503 |
| ENSMUSG 1700007K  | 7.846144 | 10.87956 | 8.897235 | 17.0613  | 14.6181  | 15.285115 |
| ENSMUSG 3425401B  | 0.191489 | 0.279965 | 0.120969 | 0.132198 | 0.146204 | 0.203578  |
| ENSMUSG Col5a1    | 3.365508 | 3.257962 | 3.435839 | 4.272742 | 4.2001   | 4.936578  |
| ENSMUSG Acvr1     | 10.30409 | 10.40434 | 9.021659 | 7.855031 | 7.861673 | 8.384979  |
| ENSMUSG Pkig      | 41.12165 | 43.1384  | 46.86415 | 51.00178 | 52.81838 | 53.068958 |
| ENSMUSG Acvr1c    | 0        | 0.014552 | 0.008371 | 0.02868  | 0        | 0.020867  |
| ENSMUSG Fam178b   | 0.896851 | 0.78018  | 1.070421 | 0.583594 | 0.435411 | 0.498039  |
| Mus_musc Mus_musc | 0        | 0.047889 | 0.250492 | 0        | 0        | 0.184186  |
| ENSMUSG Eif2b1    | 10.34351 | 10.0058  | 10.31056 | 9.37854  | 9.807686 | 10.230302 |
| ENSMUSG Ddx55     | 4.350067 | 4.87112  | 5.33369  | 4.250111 | 3.904342 | 4.217208  |
| ENSMUSG Cfap100   | 3.551385 | 3.803587 | 2.186365 | 4.060879 | 3.45609  | 3.527563  |
| ENSMUSG Adam19    | 9.370862 | 12.00124 | 11.02976 | 15.89575 | 18.42875 | 17.76845  |
| ENSMUSG 2010109A  | 0.154124 | 0.053123 | 0        | 0.204445 | 0        | 0         |
| ENSMUSG Ccng2     | 21.06592 | 23.97295 | 21.25728 | 23.00445 | 26.49682 | 22.072593 |
| ENSMUSG Gtf2h3    | 4.832227 | 5.289395 | 5.229403 | 4.903463 | 5.102004 | 5.420869  |
| ENSMUSG Cxcl1     | 7.307379 | 2.008935 | 1.734919 | 7.124619 | 6.133873 | 5.59787   |
| ENSMUSG Shroom3   | 31.56891 | 29.52935 | 29.21811 | 21.0937  | 20.8275  | 21.059554 |
| ENSMUSG Gpat2     | 0.091869 | 0.115791 | 0        | 0.105482 | 0.177173 | 0.147181  |
| Mus_musc Mus_musc | 0.350077 | 0.345589 | 0.358773 | 0.206782 | 0.464421 | 0.47864   |
| ENSMUSG Lcn6      | 0        | 0        | 0        | 0        | 0        | 0         |
| ENSMUSG Gne       | 13.92176 | 16.10336 | 12.435   | 14.4786  | 15.22325 | 16.052695 |
| ENSMUSG Clta      | 122.9946 | 113.5867 | 118.3464 | 142.1251 | 159.2986 | 156.10025 |
| ENSMUSG Tcf21     | 64.34285 | 66.83325 | 81.92357 | 53.25858 | 48.74525 | 38.61752  |
| ENSMUSG Spaar     | 1.431818 | 1.572965 | 1.473416 | 2.272602 | 1.705909 | 2.061254  |
| ENSMUSG Reck      | 19.37398 | 18.99796 | 21.30022 | 10.80427 | 12.21266 | 10.834414 |
| ENSMUSG Hint2     | 21.95699 | 20.74625 | 19.86717 | 20.17817 | 17.33561 | 19.848734 |
| ENSMUSG Pcdhb4    | 0.359323 | 0.302019 | 0.523575 | 0.361746 | 0.337181 | 0.266817  |
| ENSMUSG Ranbp3l   | 0.101636 | 0.068582 | 0.045159 | 0.04288  | 0.028172 | 0.04131   |
| ENSMUSG Plekha8   | 3.802482 | 3.960211 | 3.577039 | 3.329236 | 3.355254 | 3.240615  |
| ENSMUSG Scn4b     | 0.127757 | 0.520167 | 0.107153 | 0.179325 | 0.361356 | 0.192893  |
| ENSMUSG Timm29    | 13.67588 | 13.48195 | 13.44877 | 13.0302  | 14.57044 | 11.879281 |
| ENSMUSG Olfr231   | 0        | 0        | 0        | 0        | 0        | 0         |
| ENSMUSG Crip2     | 373.5401 | 345.8165 | 352.8134 | 200.2913 | 208.0785 | 208.65796 |
| ENSMUSG Setd1a    | 11.52147 | 10.39035 | 10.69522 | 9.563467 | 9.058199 | 9.13247   |
| ENSMUSG Plk5      | 0.743939 | 0.845982 | 0.68224  | 1.012583 | 1.338934 | 1.210717  |
| ENSMUSG Sgsm3     | 14.00933 | 13.77368 | 13.3426  | 10.74599 | 11.26439 | 10.952543 |
| ENSMUSG Ehbp1     | 6.258071 | 6.624237 | 5.270105 | 4.720547 | 4.801737 | 4.836446  |
| ENSMUSG S100a14   | 6.154465 | 6.567386 | 7.383372 | 7.273114 | 7.133878 | 7.947727  |
| ENSMUSG Tmem183   | 16.18825 | 16.70028 | 17.15941 | 15.68638 | 17.0675  | 16.172909 |
| ENSMUSG Tas2r134  | 0        | 0        | 0        | 0        | 0        | 0         |
| ENSMUSG 4930579FC | 0        | 0        | 0        | 0        | 0        | 0         |
| Mus_musc Mus_musc | 0.104389 | 0.215424 | 0.113998 | 0.080439 | 0.120342 | 0.079793  |
| ENSMUSG Thsd4     | 5.264355 | 4.849193 | 4.474172 | 3.711369 | 4.219418 | 3.498982  |
| ENSMUSG Imp3      | 41.5407  | 24.57659 | 29.73642 | 28.4991  | 35.92514 | 37.216789 |
| ENSMUSG Hagh      | 22.14495 | 20.36999 | 23.33988 | 22.08871 | 23.28168 | 21.351283 |
| ENSMUSG Gm17604   | 0        | 0        | 0        | 0        | 0        | 0         |
| ENSMUSG Tle3      | 16.43181 | 16.8722  | 18.84609 | 18.96193 | 17.11667 | 22.321413 |
| ENSMUSG 9230102O  | 0        | 0        | 0        | 0        | 0        | 0         |
| ENSMUSG Msh2      | 7.854307 | 8.891771 | 7.559418 | 7.061754 | 7.507754 | 6.652119  |
| ENSMUSG Dnaja4    | 18.8689  | 27.48558 | 21.04751 | 20.02684 | 22.64899 | 21.026102 |
| ENSMUSG Zbtb9     | 0.450465 | 0.843525 | 0.989845 | 2.021372 | 1.973675 | 2.469706  |
| ENSMUSG Gm595     | 0        | 0        | 0        | 0        | 0        | 0         |
| ENSMUSG Meiob     | 0.049075 | 0.107164 | 0.11437  | 0        | 0        | 0         |
| ENSMUSG Nxp4      | 0.307599 | 0.114879 | 0.238836 | 0.356499 | 0.138333 | 0.251184  |

|                   |          |          |          |          |          |           |
|-------------------|----------|----------|----------|----------|----------|-----------|
| ENSMUSG Gm9789    | 0        | 0        | 0        | 0        | 0        | 0         |
| ENSMUSG Dnajc21   | 9.962518 | 11.17555 | 10.39413 | 9.663007 | 9.248295 | 8.82335   |
| ENSMUSG Defb13    | 0        | 0        | 0        | 0        | 0        | 0         |
| ENSMUSG Nkx2-3    | 0        | 0        | 0        | 0        | 0        | 0.020669  |
| ENSMUSG Grsf1     | 21.64661 | 23.78068 | 21.3814  | 19.94092 | 21.35604 | 21.812013 |
| ENSMUSG Txnl4b    | 4.758787 | 4.110342 | 4.622594 | 4.362833 | 4.590458 | 4.918163  |
| ENSMUSG Hp        | 465.8955 | 514.1118 | 367.3888 | 338.317  | 333.5859 | 349.44849 |
| ENSMUSG Pkx       | 22.52403 | 23.51779 | 25.87745 | 23.42786 | 23.23105 | 23.314914 |
| ENSMUSG Vmn1r101  | 0        | 0        | 0        | 0        | 0        | 0         |
| ENSMUSG Lgals3bp  | 39.34542 | 27.24583 | 53.67926 | 52.48516 | 54.63849 | 59.909195 |
| ENSMUSG Rbm46     | 1.534302 | 1.058965 | 1.130456 | 1.130582 | 0.617532 | 1.252883  |
| ENSMUSG D3Ertd254 | 2.936133 | 2.788869 | 2.406747 | 2.308784 | 2.468771 | 2.582914  |
| Mus_musc Mus_musc | 0        | 0        | 0        | 0        | 0.186692 | 0         |
| Mus_musc Mus_musc | 0.379401 | 0.348379 | 0.553155 | 0.440797 | 0.202359 | 0.063806  |
| ENSMUSG Kcnk12    | 0.876081 | 0.595483 | 0.135335 | 0.765071 | 0.803635 | 1.079989  |
| ENSMUSG Scnn1g    | 72.83257 | 64.49993 | 71.73339 | 45.73317 | 48.1278  | 42.64035  |
| ENSMUSG Ins2      | 0        | 0        | 0        | 0        | 0        | 0         |
| ENSMUSG Olfr430   | 0        | 0        | 0        | 0        | 0.029354 | 0         |
| ENSMUSG Sarm1     | 0.197456 | 0.172371 | 0.225468 | 0.158788 | 0.113749 | 0.141923  |
| ENSMUSG Polr2a    | 37.38475 | 35.46928 | 33.84066 | 32.99673 | 33.19328 | 33.543488 |
| ENSMUSG Zfp821    | 7.935413 | 7.140686 | 7.589324 | 4.436122 | 6.728503 | 4.793801  |
| ENSMUSG Olfr1055  | 0        | 0        | 0        | 0        | 0        | 0         |
| ENSMUSG Olfr1056  | 0        | 0        | 0        | 0        | 0        | 0         |
| ENSMUSG Olfr1066  | 0        | 0        | 0        | 0        | 0        | 0         |
| ENSMUSG Olfr1057  | 0        | 0        | 0        | 0        | 0        | 0         |
| ENSMUSG Olfr1058  | 0        | 0        | 0        | 0        | 0        | 0         |
| ENSMUSG Olfr1061  | 0        | 0        | 0        | 0        | 0        | 0         |
| ENSMUSG Ppp2r2d   | 14.51698 | 15.63067 | 14.49548 | 13.19396 | 13.17386 | 13.802872 |
| ENSMUSG Gpr155    | 16.96418 | 18.49599 | 11.82745 | 11.42851 | 11.02379 | 8.859204  |
| ENSMUSG Tpp2      | 12.91429 | 12.93371 | 12.00137 | 14.179   | 14.57603 | 14.284444 |
| ENSMUSG Ubac2     | 14.79729 | 15.99402 | 16.57178 | 16.85703 | 14.69144 | 16.390566 |
| ENSMUSG Rabac1    | 238.1415 | 240.3095 | 242.6277 | 193.4598 | 186.5089 | 187.23695 |
| ENSMUSG Fxyd2     | 0.73963  | 0.862008 | 0.518067 | 0.729106 | 0.860306 | 0.994081  |
| ENSMUSG Olfr434   | 0        | 0        | 0        | 0        | 0        | 0         |
| ENSMUSG Tas2r125  | 0        | 0        | 0        | 0        | 0        | 0         |
| ENSMUSG Adad1     | 0        | 0        | 0        | 0        | 0        | 0         |
| ENSMUSG Ii21      | 0        | 0.013311 | 0        | 0.209306 | 0.193985 | 0.191321  |
| ENSMUSG Ccna2     | 0.730499 | 0.779112 | 1.146773 | 3.300214 | 4.898163 | 4.942256  |
| ENSMUSG Exosc9    | 8.666896 | 9.381032 | 8.376658 | 9.734889 | 7.991967 | 7.714445  |
| ENSMUSG Trpc3     | 0.943618 | 0.608882 | 0.877837 | 0.589789 | 0.413159 | 0.402228  |
| ENSMUSG Acad9     | 7.886225 | 7.395647 | 7.132528 | 7.110045 | 7.041992 | 6.92702   |
| ENSMUSG 1810062G  | 0.294122 | 0.433463 | 0.313765 | 0.654811 | 0.515616 | 0.524484  |
| ENSMUSG Anxa5     | 211.0663 | 195.8404 | 227.9314 | 160.1729 | 160.6177 | 172.22089 |
| ENSMUSG Naalad2   | 2.415369 | 2.587558 | 3.480725 | 1.64683  | 1.850773 | 1.880706  |
| ENSMUSG Wdfy3     | 14.98839 | 14.89419 | 11.80285 | 10.734   | 11.96921 | 11.591924 |
| ENSMUSG Adam6a    | 0        | 0        | 0.001123 | 0        | 0        | 0.120353  |
| ENSMUSG Olfr691   | 0        | 0        | 0        | 0        | 0        | 0         |
| ENSMUSG Fbxl4     | 6.892032 | 6.430219 | 6.977026 | 5.362881 | 5.128963 | 6.174325  |
| ENSMUSG Timd2     | 0        | 0        | 0        | 0.195968 | 0.200545 | 0.238386  |
| ENSMUSG 5330417C  | 20.89959 | 23.04468 | 14.28529 | 20.19012 | 21.01986 | 21.800089 |
| ENSMUSG Dtx3      | 18.56422 | 15.82555 | 18.63587 | 17.65672 | 13.35488 | 15.075266 |
| ENSMUSG Slc25a28  | 13.87247 | 14.40009 | 15.69343 | 12.75594 | 12.63632 | 11.952397 |
| ENSMUSG Gltpd2    | 0        | 0.074086 | 0.055571 | 0.056763 | 0.228913 | 0.076946  |
| ENSMUSG Gchfr     | 5.698154 | 6.002511 | 5.254307 | 5.127676 | 4.222431 | 4.010691  |
| ENSMUSG Ddit4l    | 1.148468 | 0.992784 | 0.600586 | 0.883417 | 1.118924 | 0.75427   |
| ENSMUSG Nfasc     | 0.011391 | 0.06746  | 0.017832 | 0.059804 | 0.07503  | 0.038695  |
| ENSMUSG Lrrn2     | 0.705282 | 0.738281 | 0.717782 | 0.40844  | 0.369409 | 0.521557  |
| ENSMUSG Pus7      | 4.286531 | 4.180393 | 4.282777 | 3.65501  | 3.672529 | 3.94252   |
| ENSMUSG Olfr310   | 0        | 0        | 0        | 0        | 0        | 0         |
| ENSMUSG Pik3c2b   | 1.749833 | 2.173682 | 2.005734 | 2.840049 | 2.89533  | 3.120537  |
| ENSMUSG Gm21883   | 0        | 0        | 0        | 0        | 0        | 0         |
| ENSMUSG Galnt2    | 36.56331 | 36.33396 | 37.7811  | 39.65101 | 41.26416 | 42.691715 |
| ENSMUSG Kpna6     | 13.09101 | 13.4257  | 11.68791 | 12.59857 | 12.35631 | 13.060136 |
| ENSMUSG Dus3l     | 13.11814 | 12.2179  | 13.64448 | 13.98029 | 13.04606 | 13.240764 |

|                   |          |          |          |          |          |           |
|-------------------|----------|----------|----------|----------|----------|-----------|
| ENSMUSG A43008911 | 0        | 0        | 0        | 0        | 0        | 0         |
| ENSMUSG Exoc5     | 4.80688  | 4.5225   | 4.399879 | 4.392818 | 4.18274  | 4.22494   |
| ENSMUSG Zfp82     | 1.571918 | 1.138156 | 2.094054 | 1.530113 | 1.156319 | 1.212631  |
| ENSMUSG Gm21870   | 0        | 0        | 0        | 0        | 0        | 0         |
| ENSMUSG Pcdhb8    | 0.810047 | 0.776023 | 1.025586 | 0.469802 | 0.464659 | 0.491298  |
| ENSMUSG 4933415A  | 0        | 0.052307 | 0.059031 | 0.078909 | 0.112071 | 0.081137  |
| ENSMUSG Cdk9      | 36.9363  | 33.40126 | 40.05249 | 33.65636 | 34.51701 | 35.463424 |
| Mus_musc Mus_musc | 0.660042 | 1.046344 | 0.520694 | 1.236587 | 0.254464 | 0.503358  |
| Mus_musc Mus_musc | 0        | 0.16069  | 0        | 0.31336  | 0.635175 | 0.429999  |
| ENSMUSG 6330409D  | 0.631581 | 0.553643 | 0.599746 | 0.490276 | 0.522148 | 0.486426  |
| Mus_musc Mus_musc | 1.147773 | 1.066725 | 0.905394 | 1.173954 | 0.933806 | 1.201041  |
| Mus_musc Mus_musc | 0        | 0.255757 | 0.188102 | 0        | 0        | 0.122204  |
| Mus_musc Mus_musc | 0.440418 | 0.593413 | 0.469936 | 0.398648 | 0.37193  | 0.264948  |
| Mus_musc Mus_musc | 0        | 0        | 0        | 0        | 0        | 0         |
| Mus_musc Mus_musc | 3.475748 | 3.657884 | 4.198158 | 4.61221  | 4.213792 | 4.072051  |
| ENSMUSG Armh2     | 0        | 0        | 0        | 0        | 0.152729 | 0         |
| ENSMUSG Gm17606   | 1.453284 | 0.905857 | 1.685416 | 0.958461 | 1.226692 | 1.459445  |
| ENSMUSG Scd2      | 187.6836 | 188.0928 | 194.936  | 169.7021 | 160.841  | 182.56856 |
| ENSMUSG Paip2b    | 12.3617  | 12.64881 | 12.74278 | 12.01385 | 11.81493 | 13.198156 |
| ENSMUSG Ubqln4    | 13.91523 | 14.89674 | 14.19475 | 12.96151 | 13.26587 | 13.442695 |
| ENSMUSG Bicc1     | 13.44726 | 12.77127 | 10.71777 | 9.897665 | 11.16355 | 10.223894 |
| ENSMUSG Rab25     | 18.39547 | 19.87993 | 14.91037 | 16.71531 | 17.85398 | 18.449182 |
| ENSMUSG 44304021  | 2.775768 | 2.878358 | 1.351723 | 2.711358 | 2.924459 | 2.657938  |
| ENSMUSG Krt2      | 0        | 0        | 0        | 0        | 0        | 0         |
| ENSMUSG Pitpna    | 43.81862 | 38.59719 | 39.82868 | 35.63988 | 39.29776 | 38.409699 |
| Mus_musc Mus_musc | 0        | 0.150059 | 0        | 0.331777 | 0.242588 | 0.425283  |
| Mus_musc Mus_musc | 0.152888 | 0        | 0.636884 | 0        | 0        | 0         |
| Mus_musc Mus_musc | 0.36801  | 0.175126 | 0.119015 | 0.213515 | 0        | 0         |
| Mus_musc Mus_musc | 0        | 0.045007 | 0        | 0.251362 | 0        | 0         |
| ENSMUSG Gm21497   | 0        | 0        | 0        | 0        | 0        | 0         |
| Mus_musc Mus_musc | 0.343611 | 0        | 0        | 0.538309 | 0.799063 | 0.501244  |
| ENSMUSG Gm9944    | 0        | 0        | 0        | 0        | 0        | 0         |
| ENSMUSG Olfr473   | 0        | 0        | 0        | 0        | 0        | 0         |
| Mus_musc Mus_musc | 0.08483  | 0.345447 | 0.199098 | 0.297007 | 0.119256 | 0.213379  |
| Mus_musc Mus_musc | 0.042548 | 0        | 0        | 0.188444 | 0.270091 | 0.305855  |
| ENSMUSG Btd35f3   | 0        | 0        | 0        | 0        | 0        | 0         |
| ENSMUSG Olfr1338  | 0        | 0        | 0        | 0        | 0        | 0         |
| ENSMUSG Kdelr3    | 2.819841 | 1.761819 | 2.70778  | 4.792425 | 4.795941 | 5.466205  |
| ENSMUSG Vmn2r84   | 0.031099 | 0.018534 | 0.031771 | 0.039335 | 0.061213 | 0.064135  |
| ENSMUSG Prickle4  | 0.047175 | 0        | 0.231742 | 0        | 0        | 0.144899  |
| ENSMUSG Smlr1     | 0        | 0        | 0        | 0        | 0        | 0         |
| ENSMUSG Ap2a2     | 30.93928 | 29.08843 | 29.38451 | 24.33    | 25.86975 | 26.519609 |
| ENSMUSG Gfra4     | 0.039231 | 0.633285 | 0.058815 | 0.567227 | 0.681634 | 0.42613   |
| ENSMUSG Limch1    | 159.7912 | 156.7333 | 143.9031 | 108.7303 | 105.0207 | 100.00195 |
| ENSMUSG Actrt3    | 0        | 0        | 0        | 0        | 0        | 0         |
| ENSMUSG Gm4894    | 0        | 0        | 0        | 0        | 0        | 0         |
| ENSMUSG Syne3     | 2.063565 | 2.577906 | 2.482787 | 3.004854 | 2.377049 | 3.241945  |
| ENSMUSG Mynn      | 6.464323 | 6.891289 | 7.261745 | 4.97737  | 5.28418  | 4.771957  |
| ENSMUSG Themis2   | 6.481405 | 6.108121 | 10.01401 | 10.88062 | 9.509185 | 10.516623 |
| ENSMUSG Nek5      | 2.686701 | 4.09434  | 2.217856 | 3.897718 | 4.306525 | 3.361591  |
| Mus_musc Mus_musc | 0        | 0        | 0        | 0        | 0        | 0.244022  |
| ENSMUSG Gm21409   | 0        | 0        | 0        | 0        | 0        | 0         |
| ENSMUSG Gm20867   | 0        | 0        | 0        | 0        | 0        | 0         |
| ENSMUSG Trim43b   | 0.048296 | 0.060305 | 0.030024 | 0.037542 | 0.030129 | 0.024917  |
| ENSMUSG Sap25     | 0.290917 | 0.059214 | 0.231201 | 0.014546 | 0.175073 | 0.334455  |
| ENSMUSG Tlr5      | 3.133459 | 2.516782 | 2.217677 | 1.559509 | 1.301333 | 1.720001  |
| ENSMUSG Gm15130   | 0        | 0        | 0        | 0        | 0        | 0         |
| ENSMUSG Cd209g    | 0.79845  | 0.747456 | 0.327901 | 0.658031 | 1.372883 | 0.944093  |
| ENSMUSG Slc35b2   | 23.32388 | 20.75322 | 23.85555 | 26.16777 | 25.91128 | 26.206848 |
| ENSMUSG Trmt12    | 1.303935 | 1.181225 | 1.192149 | 1.288165 | 1.452881 | 1.657387  |
| ENSMUSG Prr32     | 0        | 0        | 0        | 0        | 0        | 0         |
| ENSMUSG Akt3      | 32.21996 | 34.19923 | 27.88895 | 23.54378 | 24.11036 | 21.92878  |
| ENSMUSG Gm21173   | 0        | 0        | 0        | 0        | 0        | 0         |
| ENSMUSG Itga5     | 15.04195 | 12.71876 | 13.57274 | 13.67233 | 15.83325 | 15.760892 |

|                   |          |          |          |          |          |           |
|-------------------|----------|----------|----------|----------|----------|-----------|
| ENSMUSG Mrgprg    | 0.030977 | 0.035069 | 0        | 0.49584  | 0.810368 | 0.740024  |
| ENSMUSG Tmem220   | 4.60807  | 4.918059 | 3.866602 | 4.323644 | 4.049477 | 4.405494  |
| ENSMUSG Prag1     | 2.682832 | 2.696829 | 3.037458 | 3.924465 | 3.784504 | 4.110937  |
| ENSMUSG Dscam     | 0        | 0        | 0        | 0.022922 | 0        | 0         |
| ENSMUSG Sirt2     | 47.46869 | 46.61729 | 47.36716 | 41.94441 | 42.47146 | 40.841482 |
| ENSMUSG Tulp2     | 0.149971 | 0.134023 | 0.097869 | 0.15789  | 0.150392 | 0.1859    |
| ENSMUSG Actn1     | 54.47523 | 47.73772 | 46.08222 | 43.14923 | 45.58344 | 47.886011 |
| ENSMUSG Rab12     | 60.07188 | 61.83253 | 60.09901 | 43.7968  | 42.33858 | 41.998055 |
| ENSMUSG Erbb4     | 0.055111 | 0.160054 | 0.016505 | 0.041954 | 0.013214 | 0.03071   |
| ENSMUSG Vmn2r7    | 0        | 0        | 0        | 0        | 0        | 0         |
| ENSMUSG Prl3d3    | 0        | 0        | 0        | 0        | 0        | 0         |
| ENSMUSG Btbdb9    | 4.479267 | 4.585488 | 4.403435 | 4.302172 | 3.878678 | 4.527444  |
| ENSMUSG Gspt1     | 21.8389  | 22.41804 | 19.59595 | 22.23623 | 22.35799 | 23.871199 |
| ENSMUSG Olfr1373  | 0        | 0        | 0        | 0        | 0        | 0         |
| ENSMUSG Pebp4     | 0        | 0        | 0        | 0        | 0        | 0         |
| ENSMUSG BC055324  | 0.602912 | 0.608207 | 0.484855 | 0.689137 | 0.648843 | 1.055607  |
| ENSMUSG Ap1s2     | 18.5623  | 18.6244  | 21.76519 | 19.08211 | 19.14877 | 17.924229 |
| ENSMUSG Wapl      | 20.77364 | 21.88874 | 21.15586 | 19.31812 | 19.85963 | 20.141458 |
| ENSMUSG Zfp275    | 6.36909  | 6.565558 | 5.774672 | 5.093927 | 5.291943 | 5.020343  |
| ENSMUSG Grpr      | 0.044716 | 0        | 0        | 0        | 0        | 0.022193  |
| ENSMUSG Xlr4c     | 0.65681  | 0.444066 | 1.370124 | 1.48026  | 1.521219 | 1.559448  |
| ENSMUSG Ctps2     | 2.706984 | 2.734739 | 2.768676 | 2.513312 | 2.131588 | 2.119289  |
| ENSMUSG Duxf3     | 0        | 0        | 0        | 0        | 0        | 0         |
| ENSMUSG Cyp12     | 0        | 0        | 0        | 0        | 0        | 0         |
| ENSMUSG Vmn1r173  | 0        | 0        | 0        | 0        | 0        | 0         |
| ENSMUSG Vmn1r218  | 0        | 0        | 0        | 0        | 0        | 0         |
| ENSMUSG Scgb1b20  | 0        | 0        | 0        | 0        | 0        | 0         |
| ENSMUSG Vmn1r81   | 0        | 0        | 0        | 0        | 0        | 0         |
| ENSMUSG Gm8994    | 0        | 0        | 0        | 0        | 0        | 0         |
| ENSMUSG Mrgpre    | 0.950006 | 0.768429 | 0.552176 | 2.783796 | 2.444275 | 3.035425  |
| ENSMUSG Olfr943   | 0        | 0        | 0        | 0        | 0        | 0         |
| ENSMUSG Gsc2      | 0        | 0        | 0        | 0        | 0        | 0         |
| ENSMUSG Dok5      | 0.020951 | 0        | 0        | 0.052953 | 0        | 0         |
| ENSMUSG Focad     | 3.638226 | 3.688394 | 3.474838 | 3.665862 | 3.645626 | 3.893313  |
| ENSMUSG Ncoa6     | 11.79805 | 11.78276 | 10.78539 | 10.23398 | 11.02464 | 11.162751 |
| ENSMUSG Fbxo25    | 10.70072 | 11.68951 | 12.47231 | 10.97109 | 11.18689 | 10.598961 |
| ENSMUSG Lasp1     | 64.05781 | 61.16149 | 67.7822  | 71.60345 | 73.01938 | 77.324066 |
| ENSMUSG Efemp1    | 66.1618  | 63.44343 | 63.21434 | 42.5199  | 37.4018  | 49.448262 |
| ENSMUSG Pnpt1     | 7.037705 | 6.52055  | 7.657825 | 6.968264 | 7.345578 | 7.874047  |
| ENSMUSG Cfap36    | 17.13587 | 16.79578 | 16.02156 | 18.17176 | 16.74412 | 14.681749 |
| ENSMUSG Ppp4r3b   | 19.50467 | 21.40461 | 18.2344  | 20.69179 | 21.13897 | 20.263155 |
| ENSMUSG Rps27a    | 170.5853 | 213.3851 | 216.8603 | 270.9008 | 234.4954 | 197.54489 |
| ENSMUSG Clhc1     | 0.072742 | 0.042087 | 0        | 0.081559 | 0        | 0         |
| ENSMUSG Myl7      | 6.208065 | 65.7011  | 8.9131   | 22.06621 | 12.90535 | 7.006586  |
| Mus_musc Mus_musc | 0        | 0.090172 | 0        | 0        | 0        | 0         |
| Mus_musc Mus_musc | 0.13936  | 0.077011 | 0        | 0.123464 | 0.205814 | 0         |
| Mus_musc Mus_musc | 0        | 0        | 0        | 0        | 0        | 0.163183  |
| Mus_musc Mus_musc | 0        | 0        | 0        | 0.108271 | 0        | 0.299337  |
| Mus_musc Mus_musc | 0        | 0        | 0        | 0.281674 | 0        | 0         |
| Mus_musc Mus_musc | 0.435281 | 0.598812 | 0.151513 | 0.73475  | 0.741344 | 0.850183  |
| ENSMUSG Fuca1     | 32.14396 | 34.08036 | 33.38173 | 39.71786 | 40.77723 | 42.446568 |
| ENSMUSG Hmgcl     | 23.57367 | 25.44003 | 27.79149 | 22.74466 | 23.32601 | 23.260979 |
| ENSMUSG Gale      | 4.228144 | 3.776548 | 4.34608  | 7.712681 | 6.9837   | 8.919068  |
| ENSMUSG Lypla2    | 33.47833 | 32.25704 | 32.13142 | 32.22739 | 28.62742 | 30.216682 |
| ENSMUSG Rnf220    | 26.29563 | 23.36027 | 29.25002 | 24.27641 | 22.64896 | 20.483483 |
| ENSMUSG Srsf10    | 34.51438 | 39.15097 | 34.83427 | 31.24222 | 29.70096 | 29.546128 |
| ENSMUSG Pnrc2     | 57.15226 | 59.61051 | 52.30694 | 60.72936 | 56.43509 | 56.493197 |
| ENSMUSG Kif2c     | 0.270932 | 0.186018 | 0.423173 | 0.704025 | 1.269994 | 1.55126   |
| ENSMUSG Prc1      | 0.993505 | 1.473709 | 1.35193  | 3.462306 | 4.435731 | 6.264683  |
| ENSMUSG Cnst      | 15.80053 | 17.38163 | 14.22445 | 12.52083 | 12.58514 | 13.689931 |
| ENSMUSG Dusp14    | 20.32175 | 18.28103 | 18.24033 | 16.64729 | 15.43573 | 16.236669 |
| ENSMUSG Fn3k      | 1.406171 | 1.275914 | 0.699892 | 1.19647  | 1.174518 | 0.789833  |
| ENSMUSG Wdr45b    | 21.47957 | 24.19896 | 23.4299  | 20.40605 | 22.15226 | 23.172918 |
| ENSMUSG Ankrd2    | 0        | 0        | 0        | 0        | 0        | 0         |

|                   |          |          |          |          |          |           |
|-------------------|----------|----------|----------|----------|----------|-----------|
| ENSMUSG Ubtd1     | 0.810862 | 0.956677 | 0.438105 | 1.082615 | 0.51912  | 1.073153  |
| ENSMUSG Rab40b    | 1.409478 | 1.245585 | 1.116921 | 1.019037 | 0.817026 | 0.90856   |
| ENSMUSG Pi4k2a    | 12.90252 | 13.12746 | 12.925   | 15.62147 | 16.40152 | 18.232485 |
| ENSMUSG Mtg1      | 3.626828 | 5.062362 | 5.807965 | 4.788448 | 4.827851 | 4.932278  |
| ENSMUSG Acat1     | 21.65796 | 23.3971  | 21.72864 | 18.41731 | 17.88455 | 18.329706 |
| ENSMUSG Abhd12    | 39.63553 | 30.72063 | 34.53172 | 40.38258 | 51.426   | 51.674133 |
| ENSMUSG Siglecf   | 4.990407 | 5.113169 | 4.072741 | 7.656141 | 8.633608 | 6.978843  |
| ENSMUSG Rpusd4    | 6.760303 | 7.52658  | 8.099334 | 7.615906 | 7.45411  | 7.838687  |
| ENSMUSG Ifrd1     | 25.62368 | 22.05186 | 26.88107 | 16.84755 | 20.10583 | 17.024041 |
| ENSMUSG Tirap     | 8.147023 | 8.199397 | 8.833136 | 8.563712 | 8.88709  | 10.691438 |
| ENSMUSG Dcps      | 16.77854 | 18.7551  | 19.33915 | 19.37259 | 20.24191 | 19.647955 |
| ENSMUSG Pyroxd2   | 1.512661 | 1.229057 | 1.549431 | 2.109283 | 1.724465 | 1.75845   |
| ENSMUSG Casc4     | 10.43777 | 10.40872 | 10.31093 | 10.24761 | 9.309026 | 9.858581  |
| ENSMUSG Olfr725   | 0        | 0        | 0        | 0        | 0        | 0         |
| ENSMUSG Olfr742   | 0        | 0        | 0        | 0        | 0        | 0         |
| ENSMUSG Stx7      | 47.22832 | 47.36273 | 47.84937 | 40.10075 | 39.50933 | 36.596068 |
| ENSMUSG Map7      | 10.41785 | 11.47518 | 8.648128 | 8.36659  | 8.788077 | 9.596354  |
| ENSMUSG Ctgf      | 165.2447 | 96.28906 | 175.5482 | 63.12917 | 80.25199 | 62.734169 |
| ENSMUSG Mtrf2     | 0.166593 | 0.105095 | 0.160112 | 0.3434   | 0.385668 | 0.796136  |
| ENSMUSG Pde7b     | 6.905712 | 6.038684 | 4.62157  | 5.01649  | 3.909272 | 4.52876   |
| ENSMUSG Pom121    | 8.225889 | 8.164155 | 8.133641 | 7.092713 | 7.659795 | 8.167413  |
| ENSMUSG Rab4b     | 20.04644 | 17.4365  | 19.83145 | 20.9696  | 19.12974 | 22.114544 |
| ENSMUSG Al854703  | 0.147718 | 0.032111 | 0.127914 | 0.093086 | 0.112722 | 0.090448  |
| ENSMUSG Rpp40     | 0.628317 | 0.775563 | 0.635458 | 0.544893 | 0.816779 | 0.581743  |
| ENSMUSG Fam217a   | 0.023484 | 0.093782 | 0.023321 | 0.102946 | 0.085263 | 0.152747  |
| ENSMUSG 4933417A: | 0        | 0        | 0        | 0        | 0        | 0         |
| ENSMUSG Eci3      | 0.028477 | 0.443739 | 0        | 0.0509   | 0.06029  | 0.170034  |
| ENSMUSG Olfr633   | 0        | 0        | 0        | 0        | 0        | 0         |
| ENSMUSG Olfr646   | 0        | 0        | 0        | 0        | 0        | 0         |
| ENSMUSG Olfr641   | 0        | 0        | 0        | 0        | 0        | 0         |
| ENSMUSG Prpf4b    | 16.71121 | 16.48355 | 16.90368 | 15.08995 | 13.19101 | 13.668747 |
| ENSMUSG Fam183b   | 19.66941 | 22.03479 | 13.71333 | 29.66438 | 23.75899 | 25.922508 |
| ENSMUSG Ugt3a2    | 0        | 0        | 0        | 0        | 0        | 0         |
| ENSMUSG H2a1k     | 0        | 0        | 0        | 0.022747 | 0.038559 | 0         |
| ENSMUSG Sox14     | 0        | 0        | 0        | 0        | 0        | 0         |
| ENSMUSG Ptrh1     | 2.016657 | 1.738555 | 2.237765 | 3.603827 | 4.533105 | 4.468123  |
| ENSMUSG Gm5114    | 0.012466 | 0        | 0        | 0        | 0        | 0         |
| ENSMUSG Pcdhga10  | 2.983121 | 3.149184 | 3.004851 | 2.068318 | 1.873097 | 1.692716  |
| ENSMUSG Pebp1     | 63.60671 | 61.32688 | 54.97918 | 51.76266 | 59.26971 | 47.268642 |
| ENSMUSG Ap4b1     | 5.92993  | 5.782319 | 5.079631 | 5.714194 | 6.144532 | 6.095312  |
| ENSMUSG 4930430A: | 0.02054  | 0.096863 | 0.050314 | 0.083509 | 0        | 0.079686  |
| ENSMUSG Lhb       | 1.742139 | 2.009885 | 1.578639 | 2.93001  | 2.186168 | 3.070102  |
| ENSMUSG Sprr2k    | 0        | 0        | 0        | 0        | 0        | 0         |
| ENSMUSG Ceacam20  | 0        | 0        | 0        | 0        | 0        | 0         |
| Mus_musc Mus_musc | 1.820935 | 1.111838 | 1.574848 | 1.274116 | 0.588756 | 1.408958  |
| Mus_musc Mus_musc | 0.080976 | 0.171397 | 0.15174  | 0.018492 | 0.239944 | 0.103424  |
| ENSMUSG Cracr2b   | 56.95319 | 57.13408 | 54.33257 | 44.10956 | 47.52481 | 43.161856 |
| Mus_musc Mus_musc | 0        | 0        | 0        | 0        | 0        | 0.224617  |
| Mus_musc Mus_musc | 0        | 0.154309 | 0        | 0        | 0        | 0         |
| Mus_musc Mus_musc | 0.394072 | 0.385411 | 0.201296 | 0.089541 | 0.239983 | 0.182803  |
| ENSMUSG Trim30b   | 0.768318 | 0.896713 | 1.079656 | 0.444627 | 0.214002 | 0.221283  |
| Mus_musc Mus_musc | 0        | 0.672112 | 0.173905 | 0        | 0        | 0.095541  |
| Mus_musc Mus_musc | 0.510965 | 0.521143 | 0.70585  | 0.413645 | 0.246403 | 0.378079  |
| Mus_musc Mus_musc | 0.334126 | 0        | 0        | 0        | 0        | 0.074591  |
| ENSMUSG Moxd2     | 0        | 0        | 0        | 0        | 0        | 0         |
| ENSMUSG 1700074P: | 0        | 0        | 0        | 0        | 0        | 0         |
| ENSMUSG 2210010C: | 0.026247 | 0        | 0        | 0        | 0        | 0         |
| ENSMUSG lhh       | 0        | 0.115357 | 0.216099 | 0.080028 | 0.070267 | 0.065674  |
| ENSMUSG Tmem254c  | 5.258463 | 5.168749 | 4.930928 | 8.429152 | 6.694799 | 6.208968  |
| ENSMUSG Atg4b     | 12.52821 | 12.80802 | 12.18339 | 10.08188 | 10.91324 | 11.076077 |
| ENSMUSG Dtymk     | 20.03526 | 17.65242 | 21.37421 | 17.29393 | 17.42158 | 19.356413 |
| ENSMUSG Ttc23     | 6.762551 | 6.948397 | 6.099833 | 5.236129 | 5.964091 | 5.69184   |
| ENSMUSG Ing5      | 6.527673 | 7.331052 | 7.101816 | 5.782764 | 5.549536 | 5.413443  |
| ENSMUSG Pgpep1l   | 0        | 0.090513 | 0.206162 | 0.9192   | 0.615517 | 0.995533  |



|                   |          |          |          |          |          |           |
|-------------------|----------|----------|----------|----------|----------|-----------|
| ENSMUSG Pcd1      | 0.220669 | 0.355551 | 0.247715 | 2.531574 | 2.572437 | 2.840906  |
| ENSMUSG Nr2f2     | 14.1376  | 15.23328 | 15.83961 | 11.05748 | 12.56496 | 10.135181 |
| ENSMUSG Inpp5d    | 18.07699 | 15.56384 | 16.60949 | 18.68573 | 18.07057 | 19.097862 |
| ENSMUSG Atg16l1   | 12.82257 | 12.19193 | 14.08614 | 10.94151 | 11.99657 | 11.615626 |
| ENSMUSG Rab38     | 4.887625 | 6.498798 | 5.064228 | 4.931267 | 3.964933 | 4.426426  |
| ENSMUSG Gm37988   | 0.205568 | 0.135057 | 0.069955 | 0.166287 | 0.286246 | 0.360334  |
| ENSMUSG Gm10518   | 0.100383 | 0.109823 | 0.11575  | 0.04148  | 0.166421 | 0.243927  |
| ENSMUSG 2-Mar     | 23.84081 | 22.87255 | 21.47625 | 19.83659 | 21.9533  | 20.198452 |
| ENSMUSG Pate2     | 0.013559 | 0.052233 | 0.037067 | 0        | 0.048633 | 0         |
| ENSMUSG S100a16   | 97.5331  | 90.00594 | 88.41737 | 60.22483 | 63.11934 | 59.350087 |
| ENSMUSG Defb33    | 0        | 0.203805 | 0        | 0        | 0.143982 | 0         |
| ENSMUSG Msmo1     | 19.98947 | 18.07468 | 21.52361 | 23.62809 | 19.89007 | 24.971055 |
| ENSMUSG Khl2      | 17.09364 | 19.68719 | 19.94954 | 12.799   | 14.58321 | 11.756372 |
| ENSMUSG Vps37a    | 8.20512  | 6.942029 | 6.871493 | 7.618845 | 6.319313 | 6.907748  |
| ENSMUSG Cnot7     | 17.68092 | 17.87185 | 18.1017  | 16.25739 | 15.79606 | 13.956092 |
| ENSMUSG Fgf20     | 0        | 0        | 0        | 0        | 0        | 0         |
| ENSMUSG Galnt7    | 3.225009 | 3.292133 | 3.466172 | 7.55672  | 8.160078 | 8.462393  |
| ENSMUSG Sap30     | 3.190629 | 3.290141 | 4.169052 | 3.673764 | 5.169381 | 3.677783  |
| ENSMUSG Rfc2      | 5.800967 | 5.614873 | 5.994835 | 6.755611 | 7.735438 | 8.834457  |
| ENSMUSG Denr      | 11.86909 | 12.90627 | 13.35819 | 13.76363 | 13.78549 | 12.078728 |
| ENSMUSG Vmn1r27   | 0        | 0        | 0        | 0        | 0        | 0         |
| ENSMUSG Zdhhc5    | 18.45347 | 18.71356 | 18.21283 | 18.49506 | 19.44637 | 19.824139 |
| ENSMUSG Zfp551    | 1.069769 | 1.245841 | 0.994405 | 0.982097 | 0.668447 | 0.975398  |
| ENSMUSG Ssu2      | 0        | 0        | 0.085683 | 0        | 0        | 0         |
| ENSMUSG Barhl2    | 0        | 0        | 0        | 0        | 0        | 0         |
| ENSMUSG Ai661453  | 9.31015  | 10.15919 | 7.477852 | 6.750778 | 6.469581 | 7.26408   |
| ENSMUSG 9030624G  | 0.010637 | 0        | 0        | 0        | 0        | 0         |
| ENSMUSG Rsl1d1    | 19.21527 | 18.95358 | 18.82162 | 18.11714 | 15.77223 | 17.899446 |
| ENSMUSG Sult1b1   | 0        | 0        | 0        | 0        | 0        | 0         |
| ENSMUSG Ugt2a2    | 0        | 0        | 0        | 0        | 0        | 0         |
| ENSMUSG Pigg      | 7.33594  | 7.677131 | 6.81502  | 5.775392 | 5.88136  | 5.309381  |
| ENSMUSG Ugt2b34   | 0        | 0.010736 | 0        | 0.074032 | 0.01104  | 0.036222  |
| ENSMUSG Mtf2      | 6.306342 | 6.701009 | 6.78591  | 6.221459 | 6.680081 | 6.827697  |
| ENSMUSG Dr1       | 19.53503 | 19.89179 | 19.00611 | 18.42997 | 17.50212 | 17.471901 |
| ENSMUSG C1ql3     | 0.056892 | 0.01327  | 0.098629 | 0.130701 | 0.034024 | 0.126714  |
| Mus_musc Mus_musc | 14.76719 | 14.62641 | 14.88421 | 13.55894 | 14.39767 | 13.848124 |
| Mus_musc Mus_musc | 0.062997 | 0.139178 | 0.301635 | 0.157841 | 0.146455 | 0.218803  |
| Mus_musc Mus_musc | 0.470725 | 0.247636 | 0.315816 | 0.845105 | 0.643631 | 0.649289  |
| Mus_musc Mus_musc | 0        | 0        | 0.098059 | 0        | 0.267226 | 0.184186  |
| Mus_musc Mus_musc | 83.8595  | 64.3968  | 69.68404 | 118.5611 | 129.5446 | 105.76122 |
| Mus_musc Mus_musc | 0.463512 | 0.4159   | 0.206746 | 0.33505  | 0.29856  | 0.187841  |
| Mus_musc Mus_musc | 0        | 0.044235 | 0.190785 | 0        | 0        | 0         |
| ENSMUSG Ccdc124   | 21.24815 | 22.31654 | 25.36794 | 21.85963 | 19.81418 | 21.854728 |
| ENSMUSG Ccl2      | 1.355085 | 0.661651 | 1.025253 | 2.194145 | 3.638319 | 2.986626  |
| ENSMUSG 4930415LC | 0        | 0        | 0        | 0        | 0        | 0         |
| ENSMUSG Pmch      | 0        | 0        | 0        | 0        | 0.063726 | 0         |
| ENSMUSG Pcsk7     | 14.25201 | 14.78524 | 14.16314 | 11.49224 | 11.83874 | 12.213963 |
| ENSMUSG Vmn1r203  | 0        | 0        | 0        | 0        | 0        | 0         |
| ENSMUSG Vmn1r223  | 0        | 0        | 0        | 0        | 0        | 0         |
| ENSMUSG Slitrk4   | 0.078763 | 0.112199 | 0.054515 | 0.06814  | 0.020836 | 0.085675  |
| ENSMUSG Ly6g6f    | 0        | 0.11282  | 0.04458  | 0        | 0.043553 | 0         |
| ENSMUSG Dhcr24    | 34.86667 | 36.47754 | 42.98473 | 28.94218 | 32.53969 | 33.33588  |
| ENSMUSG Chtf8     | 37.36707 | 39.931   | 36.68187 | 35.38126 | 33.89034 | 35.231915 |
| ENSMUSG Rnf44     | 43.32456 | 40.81437 | 44.40523 | 32.63062 | 34.24093 | 34.098232 |
| ENSMUSG Tent5b    | 9.015643 | 7.459609 | 5.392144 | 4.241292 | 5.040128 | 3.508881  |
| ENSMUSG Enpp7     | 0        | 0        | 0        | 0        | 0        | 0         |
| Mus_musc Mus_musc | 0.793366 | 1.018787 | 0.729958 | 0.720399 | 0.507493 | 0.660203  |
| Mus_musc Mus_musc | 0        | 0        | 0        | 0.194824 | 0        | 0         |
| ENSMUSG Lce1j     | 0        | 0        | 0        | 0        | 0        | 0         |
| Mus_musc Mus_musc | 0        | 0.157816 | 0.105798 | 0        | 0.282396 | 0.229768  |
| Mus_musc Mus_musc | 0        | 0        | 0        | 0.139768 | 0        | 0         |
| Mus_musc Mus_musc | 0.058494 | 0.175828 | 0.031814 | 0.307173 | 0.066533 | 0.354103  |
| ENSMUSG Lce1i     | 0        | 0        | 0        | 0        | 0        | 0         |
| ENSMUSG Lce1e     | 0        | 0        | 0        | 0        | 0        | 0         |

|                   |          |          |          |          |          |           |
|-------------------|----------|----------|----------|----------|----------|-----------|
| ENSMUSG Dolk      | 6.768327 | 7.775823 | 7.910773 | 6.911601 | 7.641964 | 7.60276   |
| ENSMUSG Nek11     | 0.94918  | 0.943701 | 0.928199 | 1.598826 | 1.142148 | 0.949232  |
| ENSMUSG C8a       | 0        | 0        | 0        | 0.022035 | 0        | 0         |
| ENSMUSG Fnbp1     | 17.159   | 18.42221 | 18.02923 | 22.25744 | 20.86609 | 20.540461 |
| ENSMUSG Prcd      | 2.209195 | 2.679361 | 4.356819 | 2.77543  | 2.230542 | 2.949258  |
| ENSMUSG Tmed11    | 0        | 0        | 0        | 0        | 0        | 0         |
| ENSMUSG Spib      | 4.239586 | 3.071681 | 2.722875 | 15.94358 | 11.75526 | 13.004138 |
| ENSMUSG Il18bp    | 4.313123 | 4.482004 | 16.00432 | 8.987356 | 5.933573 | 5.248178  |
| ENSMUSG Rassf9    | 8.123675 | 8.240525 | 7.561536 | 6.646569 | 7.044621 | 6.19682   |
| ENSMUSG Olfr1030  | 0        | 0        | 0        | 0        | 0        | 0         |
| ENSMUSG H1fx      | 0.714118 | 0.62345  | 0.596621 | 0.697066 | 0.963682 | 0.935914  |
| ENSMUSG Zfp566    | 1.68897  | 1.890539 | 2.261358 | 1.465951 | 1.884961 | 1.623022  |
| Mus_musc Mus_musc | 1.642319 | 1.13417  | 1.563009 | 1.61553  | 0.625987 | 0.641625  |
| ENSMUSG Tbcbl     | 35.71642 | 32.12539 | 36.58935 | 27.60565 | 25.71368 | 26.366375 |
| ENSMUSG Bcl2l11   | 7.590505 | 8.279604 | 8.354379 | 10.30535 | 10.41407 | 9.442932  |
| Mus_musc Mus_musc | 0.188031 | 0.313616 | 0        | 0        | 0        | 0.104024  |
| ENSMUSG Haus5     | 3.714975 | 3.308618 | 3.995243 | 3.059685 | 3.04327  | 3.035031  |
| ENSMUSG Slfn1     | 5.925714 | 3.758556 | 8.994491 | 5.302824 | 3.508794 | 3.103894  |
| Mus_musc Mus_musc | 0        | 0.154309 | 0        | 0        | 0        | 0         |
| ENSMUSG U2af1l4   | 7.027283 | 5.337253 | 4.802297 | 5.307707 | 5.462348 | 3.241582  |
| Mus_musc Mus_musc | 0.316323 | 0.465871 | 0.17869  | 0.086771 | 0.075796 | 0.240773  |
| Mus_musc Mus_musc | 6.422015 | 7.900305 | 4.966533 | 3.31599  | 2.207183 | 4.72712   |
| Mus_musc Mus_musc | 0.871016 | 0.814102 | 0.319515 | 0.371765 | 0.49571  | 0.602245  |
| Mus_musc Mus_musc | 0.456937 | 0        | 0        | 0        | 0        | 0         |
| Mus_musc Mus_musc | 4.134168 | 4.206831 | 4.29544  | 3.965609 | 4.12388  | 4.231271  |
| Mus_musc Mus_musc | 0.180051 | 0        | 0.173865 | 0        | 0.04754  | 0         |
| ENSMUSG Sh2d5     | 0.135069 | 0.164672 | 0.24888  | 0.204441 | 0.057135 | 0.145094  |
| ENSMUSG 4930544Dl | 0        | 0        | 0.111878 | 0        | 0        | 0         |
| ENSMUSG Vmn1r70   | 0        | 0        | 0        | 0        | 0        | 0         |
| ENSMUSG Olfr167   | 0        | 0        | 0        | 0        | 0.007533 | 0         |
| ENSMUSG Kcnh1     | 2.087928 | 2.090154 | 1.691025 | 1.383944 | 1.732516 | 1.023608  |
| ENSMUSG Cryz1l    | 15.8285  | 18.35462 | 17.99038 | 14.39379 | 15.4826  | 15.055786 |
| ENSMUSG Xntrpc    | 0.89885  | 0.717825 | 0.55612  | 0.432887 | 0.361367 | 0.5836    |
| ENSMUSG Olfr506   | 0        | 0        | 0        | 0        | 0        | 0         |
| ENSMUSG Gm10037   | 0.220234 | 0.086374 | 0.071285 | 0.304466 | 0.070145 | 0.049318  |
| ENSMUSG Cpne4     | 0.226882 | 0.088828 | 0        | 0.079294 | 0        | 0.049408  |
| ENSMUSG Nudt16    | 7.28619  | 6.760373 | 6.171504 | 8.417217 | 7.365477 | 10.368072 |
| ENSMUSG 1700080E1 | 0        | 0        | 0        | 0        | 0        | 0         |
| ENSMUSG Aste1     | 1.985673 | 1.935552 | 2.453462 | 1.627151 | 1.463    | 2.095696  |
| ENSMUSG Dnajc13   | 9.756845 | 10.5064  | 9.656207 | 11.08524 | 10.93872 | 11.854864 |
| ENSMUSG Acpp      | 0.920012 | 1.186629 | 0.558435 | 1.531323 | 1.990488 | 1.733315  |
| ENSMUSG Gnai2     | 313.0715 | 287.4626 | 326.2841 | 269.0807 | 267.0385 | 266.71832 |
| ENSMUSG Mrpl3     | 7.772261 | 7.048446 | 6.9934   | 7.146911 | 6.971955 | 7.823986  |
| ENSMUSG Vps50     | 6.720331 | 6.284622 | 5.910205 | 7.166745 | 6.919487 | 6.972448  |
| ENSMUSG Fam102b   | 7.367419 | 8.31148  | 7.172901 | 7.588116 | 6.99902  | 8.615999  |
| ENSMUSG Nsmce4a   | 26.63668 | 26.73484 | 23.99018 | 22.67264 | 21.88748 | 21.792471 |
| ENSMUSG Ms4a6c    | 5.506432 | 5.57925  | 12.17804 | 12.22499 | 11.03465 | 9.865003  |
| ENSMUSG Atg4a     | 9.133358 | 9.33953  | 8.312702 | 9.818171 | 10.36863 | 10.020878 |
| ENSMUSG Tmem173   | 6.6112   | 5.776846 | 7.650415 | 12.91805 | 12.89986 | 14.553874 |
| ENSMUSG Rspry1    | 6.92105  | 7.45564  | 6.634872 | 7.147779 | 6.870679 | 7.057149  |
| ENSMUSG Gm2897    | 0.134471 | 0.237621 | 0.038821 | 0.054468 | 0.167269 | 0.122377  |
| ENSMUSG Btl2      | 0.132223 | 0.230501 | 0.163328 | 0.263756 | 0.3936   | 0.155308  |
| ENSMUSG Psd2      | 0.039631 | 0.095024 | 0.123466 | 0.118834 | 0        | 0.040939  |
| ENSMUSG Pfdn1     | 18.71358 | 17.30512 | 17.82441 | 20.22441 | 16.79196 | 18.821712 |
| ENSMUSG Spink8    | 0        | 0        | 0        | 0        | 0        | 0         |
| ENSMUSG Gm11111   | 0        | 0        | 0        | 0        | 0        | 0         |
| ENSMUSG Olfr935   | 0        | 0        | 0        | 0        | 0        | 0         |
| ENSMUSG Cdc45     | 1.409699 | 1.12919  | 1.286259 | 2.048782 | 2.554    | 3.266062  |
| Mus_musc Mus_musc | 0.140695 | 0        | 0        | 0        | 0.100561 | 0.111628  |
| Mus_musc Mus_musc | 0.188933 | 0.193663 | 0.133351 | 0.637486 | 0.626339 | 0.616039  |
| Mus_musc Mus_musc | 0        | 0        | 0.084329 | 0.042861 | 0        | 0.211103  |
| Mus_musc Mus_musc | 0.472074 | 0.747167 | 0.760428 | 0.768402 | 0.943881 | 0.834523  |
| Mus_musc Mus_musc | 0        | 0        | 0.101635 | 0.175549 | 0.046075 | 0.351873  |
| ENSMUSG Ranbp17   | 0.205032 | 0.322634 | 0.342451 | 0.224158 | 0.158319 | 0.252577  |

|                   |          |          |          |          |          |           |
|-------------------|----------|----------|----------|----------|----------|-----------|
| ENSMUSG Pogk      | 4.558312 | 4.381939 | 3.922293 | 3.898919 | 3.77641  | 3.956015  |
| ENSMUSG Olfr39    | 0        | 0        | 0        | 0        | 0        | 0         |
| ENSMUSG 1110051M  | 8.924973 | 9.878379 | 8.551089 | 6.644799 | 5.857709 | 6.464292  |
| ENSMUSG Rhox3e    | 0        | 0        | 0        | 0        | 0        | 0         |
| ENSMUSG Zfp11     | 2.07763  | 2.252153 | 2.00982  | 1.908198 | 1.693868 | 1.764841  |
| ENSMUSG Zfp455    | 1.122711 | 1.533605 | 1.436331 | 1.199249 | 1.199044 | 0.975535  |
| ENSMUSG Ttc24     | 0        | 0        | 0        | 0        | 0        | 0.005482  |
| ENSMUSG Mis12     | 10.06705 | 10.39704 | 10.88544 | 8.858809 | 10.61939 | 8.742456  |
| ENSMUSG Cd3eap    | 3.930109 | 3.634674 | 4.324268 | 3.490306 | 3.641659 | 3.10011   |
| ENSMUSG Fbxo30    | 8.455283 | 9.689402 | 8.439528 | 5.493958 | 7.351841 | 6.212463  |
| ENSMUSG Krt87     | 0.563851 | 0.309364 | 0.40736  | 0.196047 | 0.234062 | 0.181356  |
| ENSMUSG D930020B  | 0.194005 | 0.182626 | 0.200158 | 0.205637 | 0.313129 | 0.309027  |
| ENSMUSG Spink12   | 0        | 0        | 0        | 0        | 0        | 0         |
| ENSMUSG Gorasp2   | 41.5974  | 38.26699 | 40.34909 | 43.78024 | 44.65039 | 42.208425 |
| ENSMUSG Clca3a1   | 0.318978 | 0.51274  | 0.426358 | 0.742877 | 0.779165 | 0.747795  |
| ENSMUSG Ppp1cb    | 35.05494 | 38.2009  | 36.21738 | 30.282   | 30.03622 | 30.017891 |
| Mus_musc Mus_musc | 0        | 0.054787 | 0.067134 | 0.22248  | 0.081494 | 0.191986  |
| ENSMUSG Cyp4a12a  | 0        | 0.160054 | 0        | 0.021555 | 0        | 0         |
| Mus_musc Mus_musc | 0.091399 | 0        | 0.073435 | 0        | 0.092547 | 0         |
| Mus_musc Mus_musc | 0.157452 | 0        | 0.206654 | 0.199462 | 0.250391 | 0         |
| Mus_musc Mus_musc | 0        | 0        | 0        | 0        | 0.087161 | 0.165455  |
| ENSMUSG Gm10663   | 0        | 0        | 0        | 0        | 0        | 0         |
| ENSMUSG 1110032FC | 0.065643 | 0.035016 | 0.086368 | 0.097336 | 0.113478 | 0.029078  |
| ENSMUSG Aox2      | 0        | 0.014252 | 0        | 0        | 0.007311 | 0         |
| ENSMUSG Mars2     | 1.216477 | 1.256581 | 0.914909 | 1.136051 | 0.90093  | 1.176369  |
| ENSMUSG Haus3     | 4.034779 | 4.481133 | 5.044673 | 5.037731 | 4.290508 | 5.884734  |
| Mus_musc Mus_musc | 0        | 0        | 0        | 0        | 0        | 0.184602  |
| Mus_musc Mus_musc | 0        | 0        | 0        | 0        | 0        | 0         |
| Mus_musc Mus_musc | 0.276716 | 0        | 0        | 0        | 0        | 0         |
| Mus_musc Mus_musc | 0.12712  | 0.091523 | 0.098348 | 0        | 0.243664 | 0         |
| ENSMUSG 2-Mar     | 55.85948 | 47.94804 | 56.41352 | 37.30424 | 41.86112 | 41.06448  |
| Mus_musc Mus_musc | 0.506434 | 0.095187 | 0.839113 | 0.031976 | 0.070868 | 0.014542  |
| Mus_musc Mus_musc | 0.08397  | 0.321936 | 0        | 0.547555 | 0        | 0.129435  |
| Mus_musc Mus_musc | 0        | 0.308619 | 0        | 0.129213 | 0        | 0         |
| Mus_musc Mus_musc | 0        | 0        | 0.20333  | 0        | 0        | 0         |
| ENSMUSG Fli1      | 9.919576 | 9.696021 | 10.31789 | 9.496153 | 9.226304 | 9.698866  |
| ENSMUSG Gm10413   | 0        | 0        | 0        | 0        | 0        | 0         |
| ENSMUSG Gm21983   | 1.495639 | 0.937921 | 1.514282 | 1.277693 | 0.972379 | 1.357576  |
| ENSMUSG Gm2012    | 0        | 0        | 0        | 0        | 0        | 0         |
| Mus_musc Mus_musc | 0        | 0.054657 | 0.111968 | 0.331981 | 0.224824 | 0.229886  |
| Mus_musc Mus_musc | 0        | 0        | 0        | 0        | 0        | 0         |
| Mus_musc Mus_musc | 0.176824 | 0.268821 | 0.096416 | 0.132667 | 0.270883 | 0.205417  |
| Mus_musc Mus_musc | 0        | 0.100956 | 0.101939 | 0.156283 | 0.121213 | 0         |
| Mus_musc Mus_musc | 0        | 0.529239 | 0.468299 | 0.216548 | 0.252931 | 0         |
| Mus_musc Mus_musc | 1.283471 | 0.416588 | 0.539685 | 0.310127 | 0.242531 | 0.54719   |
| Mus_musc Mus_musc | 0        | 0        | 0        | 0.174016 | 0        | 0         |
| ENSMUSG Pcdhga2   | 1.206021 | 0.388574 | 1.406188 | 0.882945 | 0.354106 | 0.309643  |
| Mus_musc Mus_musc | 0        | 0        | 0        | 0        | 0        | 0         |
| Mus_musc Mus_musc | 0        | 0.154309 | 0        | 0.297005 | 0.388124 | 0         |
| Mus_musc Mus_musc | 0        | 0        | 0        | 0        | 0        | 0         |
| Mus_musc Mus_musc | 0.88711  | 0.972128 | 0.64379  | 1.087292 | 0.799619 | 0.943345  |
| ENSMUSG Tmem125   | 5.895989 | 6.656194 | 5.199984 | 4.125691 | 3.709317 | 4.77356   |
| ENSMUSG Zfp940    | 0.686328 | 0.558875 | 0.945076 | 0.610688 | 0.59468  | 0.498226  |
| ENSMUSG Atp5k     | 15.88764 | 11.57216 | 20.53576 | 20.82354 | 21.56372 | 21.182659 |
| ENSMUSG Olfr958   | 0        | 0        | 0        | 0        | 0        | 0         |
| Mus_musc Mus_musc | 1.052334 | 0.57351  | 0.741327 | 1.105459 | 1.173122 | 0.983127  |
| Mus_musc Mus_musc | 0.131736 | 0.2388   | 0.258188 | 0.257856 | 1.217595 | 0.172222  |
| Mus_musc Mus_musc | 0        | 0        | 0        | 0        | 0        | 0         |
| ENSMUSG Phf21b    | 0.435084 | 0.623015 | 0.607342 | 0.41637  | 0.293967 | 0.496824  |
| ENSMUSG Nlrp14    | 0        | 0        | 0        | 0        | 0        | 0         |
| ENSMUSG Arfgef1   | 23.35254 | 23.99079 | 20.56236 | 21.29206 | 21.16707 | 19.047071 |
| ENSMUSG Taar7e    | 0        | 0        | 0        | 0        | 0        | 0         |
| ENSMUSG Speer3    | 0        | 0        | 0        | 0        | 0        | 0         |
| ENSMUSG Olfr976   | 0        | 0        | 0        | 0        | 0        | 0         |

|                    |          |          |          |          |          |           |
|--------------------|----------|----------|----------|----------|----------|-----------|
| ENSMUSG Slc25a22   | 7.130128 | 7.329138 | 9.097746 | 7.330299 | 7.571626 | 7.613968  |
| ENSMUSG Gtsf2      | 0        | 0        | 0        | 0        | 0        | 0         |
| ENSMUSG Tmem69     | 4.063409 | 4.783761 | 4.541625 | 4.381591 | 4.46729  | 4.851327  |
| ENSMUSG Zfp113     | 2.161947 | 1.878175 | 1.69324  | 1.655942 | 1.705491 | 1.517986  |
| ENSMUSG Scin       | 0.081365 | 0.200422 | 0.143329 | 6.161508 | 5.20295  | 7.204665  |
| ENSMUSG Colec11    | 0.835893 | 0.351263 | 0.126465 | 0.169891 | 0.137902 | 0.326089  |
| ENSMUSG Vmn1r238   | 0        | 0        | 0        | 0        | 0        | 0         |
| ENSMUSG Tma7       | 25.099   | 26.57042 | 30.6097  | 35.20599 | 32.94968 | 32.614414 |
| ENSMUSG Cldn20     | 0.252988 | 0.526288 | 0.343248 | 0.351196 | 0.316528 | 0.316186  |
| ENSMUSG Olfr102    | 0        | 0        | 0        | 0        | 0        | 0         |
| ENSMUSG Olfr11     | 0        | 0        | 0        | 0        | 0        | 0         |
| ENSMUSG Pank3      | 19.83278 | 21.68117 | 17.54708 | 17.98387 | 17.95288 | 16.994465 |
| ENSMUSG Unc45b     | 11.40614 | 11.72118 | 12.32953 | 8.566293 | 6.867868 | 7.859162  |
| ENSMUSG Fndc8      | 0.047161 | 0        | 0.020279 | 0.046035 | 0        | 0.065052  |
| ENSMUSG Rad51d     | 4.393879 | 4.678549 | 5.269346 | 3.770797 | 4.45848  | 4.709656  |
| ENSMUSG Wwc1       | 59.69763 | 59.86452 | 54.08107 | 44.32112 | 43.66668 | 43.995819 |
| ENSMUSG Rars       | 14.72886 | 16.82019 | 16.1803  | 18.71147 | 17.81031 | 20.021019 |
| ENSMUSG Tmc3       | 0.432977 | 0.303261 | 0.41437  | 0.477013 | 0.345355 | 0.320527  |
| ENSMUSG Srd5a2     | 0        | 0        | 0        | 0.065053 | 0        | 0         |
| ENSMUSG Pcid2      | 11.40432 | 9.7336   | 11.29237 | 9.137813 | 9.325185 | 8.89856   |
| ENSMUSG BC028528   | 74.74019 | 73.74606 | 99.09186 | 66.41451 | 64.08544 | 58.664756 |
| ENSMUSG Inip       | 7.102037 | 7.897664 | 6.899154 | 7.584401 | 7.041007 | 7.672874  |
| ENSMUSG Cul7       | 9.077115 | 8.283587 | 8.115666 | 7.308516 | 7.325801 | 7.761369  |
| ENSMUSG Ranbp9     | 16.62806 | 16.62771 | 15.62814 | 13.85586 | 13.87487 | 13.9011   |
| ENSMUSG Gm6356     | 0        | 0        | 0        | 0        | 0        | 0         |
| ENSMUSG Fads1      | 44.01801 | 43.38495 | 43.9459  | 42.38188 | 40.38593 | 44.672237 |
| ENSMUSG Plcd1      | 3.843667 | 3.808417 | 4.301588 | 3.866739 | 3.672548 | 4.060651  |
| ENSMUSG Tvp23b     | 16.24828 | 18.8219  | 16.56829 | 15.45988 | 15.40997 | 16.359694 |
| ENSMUSG Gpatch11   | 7.533276 | 8.067771 | 8.610352 | 6.835656 | 6.268738 | 6.298812  |
| ENSMUSG Gm10181    | 0        | 0        | 0        | 0        | 0        | 0         |
| ENSMUSG Mapk7      | 8.983958 | 7.797268 | 9.652254 | 7.818915 | 8.13191  | 8.833989  |
| ENSMUSG Sgf29      | 11.85502 | 12.44471 | 14.06695 | 10.98494 | 9.621503 | 10.265342 |
| ENSMUSG Nupr1      | 53.33103 | 67.83198 | 65.88827 | 114.1315 | 121.6912 | 111.49501 |
| ENSMUSG Sult1a1    | 57.8921  | 65.09879 | 58.7959  | 37.57421 | 40.35316 | 31.635518 |
| ENSMUSG Kik7       | 0        | 0        | 0        | 0        | 0        | 0         |
| ENSMUSG B9d1       | 6.596288 | 6.376996 | 4.926031 | 6.805799 | 7.038154 | 8.89858   |
| ENSMUSG Gm8011     | 0        | 0        | 0        | 0        | 0        | 0         |
| ENSMUSG Kcne1      | 0        | 0        | 0        | 0        | 0.030597 | 0         |
| ENSMUSG Col6a3     | 8.994536 | 8.447582 | 9.453899 | 12.23622 | 12.54318 | 13.31251  |
| ENSMUSG Entpd1     | 35.04736 | 32.08901 | 31.01874 | 31.69813 | 33.82151 | 31.216047 |
| ENSMUSG Hnrnpu     | 54.85825 | 48.90655 | 53.86573 | 50.8919  | 51.86232 | 55.124694 |
| ENSMUSG Lonrf1     | 4.761909 | 4.148288 | 4.055263 | 2.837393 | 3.405972 | 2.604759  |
| ENSMUSG Ccdc151    | 1.230156 | 1.681623 | 0.611608 | 1.912462 | 2.195099 | 2.328406  |
| ENSMUSG 330000210  | 1.173895 | 0.75932  | 0.853777 | 0.892034 | 0.603016 | 1.141955  |
| ENSMUSG Zfp189     | 2.267919 | 3.000664 | 2.485413 | 1.790694 | 1.778583 | 2.038597  |
| ENSMUSG Coro7      | 7.12266  | 5.621782 | 7.186196 | 9.177531 | 8.44386  | 9.122513  |
| ENSMUSG Adprhl1    | 0.143353 | 0.655993 | 0.112419 | 0.069833 | 0.043888 | 0.048196  |
| ENSMUSG Atp4b      | 0        | 0        | 0        | 0        | 0        | 0         |
| ENSMUSG Agap1      | 8.99743  | 10.36695 | 9.072484 | 6.589111 | 6.680467 | 6.658456  |
| ENSMUSG F7         | 10.017   | 9.015554 | 9.453836 | 36.85333 | 40.52343 | 41.980991 |
| ENSMUSG A830031A   | 0        | 0        | 0        | 0        | 0        | 0         |
| ENSMUSG Cul4a      | 25.27937 | 25.68611 | 24.18606 | 24.42615 | 23.52801 | 24.246996 |
| ENSMUSG Lamp1      | 312.9389 | 307.4396 | 326.6083 | 324.3293 | 349.5292 | 360.11243 |
| ENSMUSG F10        | 2.805363 | 3.181286 | 4.017116 | 24.59787 | 27.5639  | 30.371652 |
| ENSMUSG Proz       | 1.249804 | 0.942453 | 0.991202 | 3.25127  | 2.574042 | 2.183433  |
| ENSMUSG Trip6      | 10.07035 | 11.68751 | 10.70477 | 7.195222 | 6.840448 | 8.22904   |
| ENSMUSG Clec4n     | 18.12355 | 14.91058 | 17.92003 | 30.55906 | 38.37541 | 29.073493 |
| ENSMUSG Mx2        | 1.402621 | 1.007376 | 1.567806 | 0.887456 | 0.965716 | 0.860259  |
| ENSMUSG Ldlrap1    | 9.140444 | 9.334574 | 9.253517 | 8.17347  | 7.741418 | 8.210716  |
| ENSMUSG Lsm1       | 3.87957  | 4.172939 | 4.574615 | 4.841805 | 4.217964 | 4.568137  |
| ENSMUSG Gle1       | 13.39346 | 14.51639 | 13.04535 | 10.60639 | 11.56413 | 11.67327  |
| ENSMUSG Mrpl24     | 27.49403 | 26.54423 | 29.48613 | 32.11825 | 29.35674 | 28.869502 |
| ENSMUSG Olfr296-ps | 0        | 0        | 0        | 0        | 0        | 0         |
| ENSMUSG L3hypdh    | 2.523328 | 2.630842 | 2.412622 | 2.691786 | 3.113409 | 3.223963  |

|                   |          |          |          |          |          |           |
|-------------------|----------|----------|----------|----------|----------|-----------|
| ENSMUSG Smcr8     | 9.200531 | 10.09513 | 8.771043 | 9.475938 | 10.37311 | 10.529737 |
| ENSMUSG Amn       | 0        | 0        | 0        | 0.084706 | 0.070243 | 0         |
| ENSMUSG Cdc42bpb  | 40.94469 | 40.16976 | 40.11638 | 30.39627 | 31.76531 | 30.972882 |
| ENSMUSG Krt90     | 0        | 0        | 0        | 0        | 0        | 0         |
| ENSMUSG Vmn1r26   | 0        | 0        | 0        | 0        | 0        | 0         |
| ENSMUSG Mex3d     | 9.056226 | 8.374834 | 9.341234 | 7.068017 | 7.638109 | 7.785598  |
| ENSMUSG Cinp      | 9.889412 | 11.14724 | 11.91785 | 11.59302 | 11.75098 | 11.518877 |
| ENSMUSG Traf3     | 5.97419  | 5.954642 | 6.445307 | 8.177062 | 7.639094 | 8.272165  |
| ENSMUSG Olfr435   | 0        | 0        | 0        | 0        | 0        | 0         |
| ENSMUSG Zfp839    | 3.507093 | 2.856249 | 3.176299 | 3.135028 | 2.929534 | 3.046609  |
| ENSMUSG Fdft1     | 12.20244 | 9.434301 | 12.97722 | 12.37235 | 11.52041 | 13.690687 |
| ENSMUSG Rsph10b   | 2.022541 | 3.314679 | 1.977833 | 3.239954 | 2.921938 | 3.30742   |
| ENSMUSG Fundc2    | 13.4281  | 11.30629 | 11.68828 | 12.01802 | 9.885768 | 11.802766 |
| ENSMUSG Gm9040    | 0.065806 | 0.087687 | 0.028927 | 0.060162 | 0.065873 | 0.081531  |
| ENSMUSG 4931400O  | 0        | 0        | 0        | 0        | 0        | 0         |
| ENSMUSG Mib2      | 14.03512 | 15.13179 | 15.82811 | 12.13502 | 13.26633 | 12.855915 |
| ENSMUSG F8        | 0.328373 | 0.205788 | 0.291073 | 0.377486 | 0.3394   | 0.290855  |
| ENSMUSG Vbp1      | 27.19607 | 27.02375 | 26.98536 | 22.95224 | 24.11499 | 25.259616 |
| ENSMUSG Gnb1      | 148.1435 | 147.1942 | 154.792  | 112.6312 | 123.4677 | 119.45416 |
| ENSMUSG Mrpl20    | 28.19496 | 30.11706 | 32.62633 | 32.61739 | 28.29952 | 36.216869 |
| Mus_musc Mus_musc | 0        | 0        | 0.337872 | 0        | 0        | 0         |
| Mus_musc Mus_musc | 0        | 0        | 0        | 0        | 0        | 0         |
| Mus_musc Mus_musc | 0.079366 | 0.355185 | 0        | 0.07162  | 0        | 0.326958  |
| Mus_musc Mus_musc | 0.130317 | 0        | 0.339521 | 0.632461 | 0.595336 | 0.486835  |
| Mus_musc Mus_musc | 2.548518 | 3.51438  | 3.452986 | 2.309299 | 1.838843 | 1.569599  |
| ENSMUSG D330020A  | 0        | 0.029043 | 0        | 0        | 0        | 0         |
| ENSMUSG Ptges3l   | 1.164369 | 0.873333 | 0.701465 | 1.575368 | 1.652944 | 1.540506  |
| ENSMUSG Evc       | 4.737458 | 5.094788 | 4.526378 | 3.830904 | 3.299433 | 3.347056  |
| ENSMUSG Pmm2      | 13.67252 | 11.80895 | 14.94316 | 15.66125 | 14.46158 | 16.010486 |
| ENSMUSG Gm6337    | 0        | 0        | 0        | 0        | 0        | 0         |
| ENSMUSG Vmn2r80   | 0        | 0        | 0        | 0        | 0        | 0         |
| ENSMUSG Fbln5     | 25.33251 | 23.46882 | 24.0377  | 20.91081 | 18.34774 | 19.779144 |
| ENSMUSG Figla     | 0        | 0        | 0        | 0        | 0        | 0         |
| ENSMUSG Dglucy    | 3.044427 | 3.539265 | 2.48788  | 3.869723 | 3.761988 | 3.8649    |
| ENSMUSG Ccdc88c   | 7.167775 | 5.960561 | 6.872501 | 9.724929 | 8.586878 | 9.377514  |
| ENSMUSG Scrib     | 13.68077 | 13.19658 | 13.34449 | 11.81723 | 12.22918 | 11.692309 |
| ENSMUSG Rps6ka5   | 2.664917 | 2.430863 | 2.232041 | 2.113223 | 1.738776 | 1.789434  |
| ENSMUSG Plec      | 30.4283  | 29.5643  | 28.91321 | 22.2038  | 24.13786 | 25.763496 |
| ENSMUSG Grina     | 67.51234 | 57.28996 | 77.7276  | 61.57479 | 58.79239 | 63.664792 |
| ENSMUSG Tmem114   | 0        | 0        | 0        | 0        | 0        | 0         |
| ENSMUSG Gpaa1     | 14.46481 | 13.88901 | 15.58289 | 13.95127 | 15.29618 | 14.864983 |
| ENSMUSG Slc52a2   | 2.318361 | 2.038989 | 2.01088  | 2.232302 | 2.421882 | 2.503004  |
| ENSMUSG Trip11    | 10.17887 | 10.05102 | 8.659462 | 10.03458 | 9.837203 | 9.225882  |
| ENSMUSG Oplah     | 16.0022  | 15.24404 | 12.61216 | 10.73571 | 11.21627 | 12.275863 |
| Mus_musc Mus_musc | 0.063886 | 0.025295 | 0.07388  | 0.359087 | 0.187328 | 0.087862  |
| Mus_musc Mus_musc | 0.727938 | 0.853208 | 0.537363 | 0.442041 | 0.505579 | 0.84587   |
| Mus_musc Mus_musc | 0        | 0        | 0        | 0.302501 | 0        | 0         |
| Mus_musc Mus_musc | 0.188031 | 0        | 0        | 0        | 0        | 0         |
| Mus_musc Mus_musc | 0        | 0        | 0        | 0.096149 | 0.186692 | 0         |
| Mus_musc Mus_musc | 0        | 0        | 0.030716 | 0        | 0        | 0         |
| ENSMUSG Eif2s3y   | 16.38331 | 13.90927 | 16.78205 | 11.51852 | 11.57188 | 13.529815 |
| ENSMUSG Ddx3y     | 20.84581 | 18.06089 | 17.25277 | 14.88319 | 14.32432 | 14.899077 |
| ENSMUSG Zfp13     | 2.680737 | 2.882651 | 3.40394  | 2.21253  | 2.187953 | 2.266119  |
| ENSMUSG Tnp03     | 18.32802 | 18.91395 | 17.79028 | 17.22854 | 18.1946  | 18.148271 |
| ENSMUSG Gmfb      | 50.80418 | 41.56946 | 39.12336 | 34.69209 | 40.99065 | 32.943925 |
| ENSMUSG Slc25a31  | 0.046478 | 0        | 0.073592 | 0.02306  | 0        | 0         |
| ENSMUSG Raly      | 110.045  | 92.84615 | 112.7003 | 82.895   | 103.7779 | 102.42    |
| ENSMUSG Grhpr     | 10.52907 | 11.60538 | 10.44159 | 9.411147 | 9.29567  | 9.211746  |
| ENSMUSG Fam49a    | 10.05853 | 10.58238 | 10.34891 | 8.186695 | 7.736049 | 7.219584  |
| ENSMUSG Cnot3     | 19.05716 | 16.80252 | 18.39713 | 17.37008 | 16.86079 | 16.768835 |
| ENSMUSG Laptm4a   | 338.1662 | 342.0872 | 366.9975 | 266.903  | 257.2698 | 256.82361 |
| ENSMUSG Agr2      | 0        | 1.371069 | 0.225966 | 20.86374 | 20.15302 | 19.496523 |
| ENSMUSG Muc20     | 2.775323 | 2.853953 | 2.689164 | 3.894926 | 2.945921 | 3.496154  |
| ENSMUSG Matn3     | 0        | 0.069833 | 0.026176 | 0.013279 | 0.055748 | 0         |

|                   |          |          |          |          |          |           |
|-------------------|----------|----------|----------|----------|----------|-----------|
| ENSMUSG Allc      | 0        | 0        | 0        | 0        | 0        | 0         |
| ENSMUSG Fkbp1b    | 5.190201 | 5.717316 | 5.50769  | 3.931943 | 3.610485 | 5.282929  |
| ENSMUSG Ubxn2a    | 21.3974  | 23.66476 | 18.00864 | 19.22997 | 20.46676 | 19.709217 |
| ENSMUSG Dcdc2c    | 0        | 0        | 0        | 0        | 0        | 0         |
| ENSMUSG Rnaseh1   | 6.217121 | 7.49259  | 7.966704 | 6.393457 | 6.544176 | 7.462708  |
| Mus_musc Mus_musc | 0        | 0.40856  | 0.243467 | 0.10244  | 0        | 0         |
| ENSMUSG Pfn4      | 0        | 0        | 0.031841 | 0        | 0        | 0.037601  |
| ENSMUSG Cmpk2     | 7.4273   | 7.176707 | 11.04864 | 7.322219 | 5.983373 | 5.128522  |
| ENSMUSG Fga       | 0        | 0        | 0        | 0.047086 | 0.167781 | 0.021359  |
| ENSMUSG Lrat      | 10.22797 | 8.344956 | 10.02589 | 8.44432  | 4.718841 | 5.895441  |
| ENSMUSG Sfxn2     | 3.109636 | 4.16704  | 3.470734 | 3.425706 | 2.880006 | 3.187606  |
| ENSMUSG Gucy1b1   | 64.87247 | 62.867   | 71.45079 | 36.84485 | 38.60238 | 32.082361 |
| ENSMUSG Trim8     | 42.78519 | 40.90731 | 42.37117 | 34.8045  | 36.49808 | 36.972763 |
| ENSMUSG Snx7      | 13.99465 | 15.0149  | 14.69258 | 18.86216 | 19.26982 | 25.52836  |
| ENSMUSG Asic5     | 0        | 0        | 0        | 0        | 0        | 0         |
| ENSMUSG Efhc2     | 0.242512 | 0.136123 | 0.184017 | 0.155007 | 0.332888 | 0.304116  |
| ENSMUSG Acot1     | 12.32372 | 10.0825  | 7.898549 | 9.577558 | 12.81762 | 8.126101  |
| ENSMUSG Sod3      | 63.84975 | 47.59062 | 64.68194 | 52.26448 | 53.15333 | 55.640606 |
| ENSMUSG Ptgr2     | 16.03265 | 16.53301 | 13.86014 | 17.03164 | 15.06792 | 14.256772 |
| ENSMUSG Nup62cl   | 1.406793 | 0.993658 | 0.471887 | 0.498309 | 0.575724 | 0.96876   |
| ENSMUSG Ripply1   | 0        | 0        | 0        | 0        | 0        | 0         |
| ENSMUSG Lbhd2     | 0        | 0.12694  | 0        | 0.16986  | 0        | 0.710354  |
| ENSMUSG Nol11     | 6.689662 | 6.570897 | 5.636812 | 5.984433 | 6.137351 | 6.88278   |
| Mus_musc Mus_musc | 6.534943 | 6.274663 | 4.69931  | 3.912155 | 5.027212 | 5.887057  |
| ENSMUSG Rlbp1     | 0.078742 | 0        | 0        | 0        | 0.026147 | 0.16931   |
| ENSMUSG 1110008P  | 16.16026 | 15.29731 | 16.68689 | 23.49857 | 28.79443 | 27.267364 |
| ENSMUSG Orm1      | 0.488154 | 1.547274 | 0.216456 | 4.151464 | 2.117453 | 2.392282  |
| ENSMUSG Adk       | 54.44537 | 59.15227 | 52.16492 | 42.8589  | 38.32852 | 41.525783 |
| ENSMUSG Rbpj      | 6.721858 | 7.093342 | 6.213923 | 7.992534 | 7.48056  | 9.53809   |
| ENSMUSG Nlrc4     | 0.767679 | 0.440243 | 0.771517 | 0.866585 | 0.90435  | 1.182001  |
| ENSMUSG Mpp3      | 1.090952 | 0.971023 | 1.09389  | 0.449945 | 0.466774 | 0.204843  |
| ENSMUSG Il1rapl1  | 0.004982 | 0.020241 | 0        | 0        | 0.01204  | 0         |
| ENSMUSG Hcrr2     | 0        | 0        | 0        | 0        | 0.004914 | 0         |
| ENSMUSG Ptchd3    | 0        | 0        | 0.045698 | 0        | 0.033785 | 0.043307  |
| ENSMUSG Zdhhc1    | 24.25667 | 22.6557  | 21.73614 | 19.36153 | 18.39787 | 19.118316 |
| ENSMUSG Actn2     | 0.637609 | 3.976413 | 0.800162 | 1.681049 | 1.279707 | 0.976621  |
| ENSMUSG Sirpa     | 35.78181 | 32.51559 | 39.31908 | 44.60403 | 45.82309 | 52.922754 |
| ENSMUSG Bri3bp    | 1.840927 | 1.641569 | 1.720001 | 2.23465  | 2.520029 | 2.89138   |
| ENSMUSG Ankrd9    | 2.857548 | 3.133008 | 3.398421 | 2.346316 | 3.517962 | 2.960359  |
| ENSMUSG Ankrd13b  | 3.647165 | 3.116302 | 3.251555 | 2.596833 | 2.925264 | 3.05537   |
| ENSMUSG 4930539E  | 0        | 0.050351 | 0.02205  | 0.0321   | 0.138852 | 0.056133  |
| ENSMUSG Neurog1   | 0        | 0        | 0        | 0        | 0        | 0         |
| ENSMUSG Fyb2      | 0.125734 | 0.066132 | 0.067984 | 0.131067 | 0.132101 | 0.075119  |
| ENSMUSG Gm47189   | 0        | 0        | 0        | 0        | 0        | 0         |
| ENSMUSG Olfr1167  | 0        | 0        | 0        | 0        | 0        | 0         |
| ENSMUSG Ccdc78    | 2.701359 | 2.770587 | 2.497053 | 5.640277 | 4.525136 | 5.642278  |
| ENSMUSG Naip5     | 1.409158 | 1.441247 | 1.67959  | 2.054273 | 1.879863 | 2.108281  |
| ENSMUSG Gm20897   | 0        | 0        | 0        | 0        | 0        | 0         |
| ENSMUSG Gml2      | 0        | 0        | 0        | 0        | 0        | 0         |
| ENSMUSG Gm4841    | 0.039289 | 0.084114 | 0.856824 | 0.738925 | 0.228004 | 0.530558  |
| ENSMUSG Gm8225    | 0        | 0        | 0        | 0        | 0        | 0         |
| ENSMUSG Lss       | 6.367505 | 5.563547 | 5.995808 | 8.041371 | 6.365335 | 9.521938  |
| ENSMUSG Rnf125    | 9.742317 | 11.37608 | 9.499835 | 9.329389 | 11.18584 | 10.29795  |
| ENSMUSG Slc7a6os  | 16.19228 | 16.20935 | 16.40064 | 15.30043 | 16.16882 | 16.107649 |
| ENSMUSG Kirrel2   | 0        | 0        | 0        | 0        | 0        | 0         |
| ENSMUSG Cdc14b    | 4.574849 | 4.788231 | 4.892226 | 3.45534  | 3.422418 | 3.518588  |
| ENSMUSG Ripk4     | 11.74278 | 11.24066 | 9.074897 | 7.90058  | 7.083157 | 7.966915  |
| ENSMUSG Olfr812   | 0        | 0        | 0        | 0        | 0        | 0         |
| ENSMUSG Olfr1257  | 0.018421 | 0        | 0        | 0        | 0        | 0         |
| ENSMUSG Gnaq      | 23.62815 | 26.11881 | 22.72785 | 21.15527 | 22.2751  | 20.097513 |
| ENSMUSG Hsd17b7   | 2.575677 | 2.270757 | 2.578033 | 2.776602 | 2.484697 | 3.5483    |
| ENSMUSG Ddr2      | 15.53683 | 15.02222 | 13.55038 | 12.01221 | 11.06396 | 10.800308 |
| ENSMUSG Ccdc3     | 1.373474 | 0.761953 | 1.228931 | 1.056284 | 1.168121 | 0.81918   |
| ENSMUSG Uap1      | 22.17089 | 22.57853 | 22.69031 | 23.21711 | 22.99247 | 21.952607 |

|                   |          |          |          |          |          |           |
|-------------------|----------|----------|----------|----------|----------|-----------|
| ENSMUSG Optn      | 8.132478 | 9.428069 | 7.877672 | 8.676496 | 8.454938 | 8.245741  |
| ENSMUSG Enkur     | 5.245277 | 6.758977 | 3.801556 | 7.869914 | 7.724454 | 6.242208  |
| ENSMUSG Rgs5      | 2.313944 | 2.582307 | 1.916988 | 13.36029 | 11.95442 | 13.92216  |
| ENSMUSG Rhox8     | 0        | 0        | 0        | 0        | 0        | 0         |
| ENSMUSG Kcp       | 0.610267 | 0.269993 | 0.274769 | 0.285639 | 0.324588 | 0.350245  |
| ENSMUSG Olfr1201  | 0        | 0        | 0        | 0        | 0        | 0         |
| ENSMUSG Nipa2     | 9.827918 | 8.742928 | 9.049671 | 9.617551 | 9.901389 | 10.718124 |
| ENSMUSG Oca2      | 0        | 0        | 0        | 0        | 0        | 0         |
| ENSMUSG Herc2     | 13.51355 | 14.37185 | 12.15615 | 12.08659 | 13.16071 | 12.820362 |
| ENSMUSG Ino80d    | 7.047767 | 7.466304 | 6.549166 | 5.880071 | 5.750746 | 5.997823  |
| ENSMUSG Rsph6a    | 0        | 0        | 0        | 0        | 0        | 0         |
| ENSMUSG Begain    | 0.918972 | 0.360071 | 0.45683  | 0.379676 | 0.384055 | 0.466489  |
| ENSMUSG Crocc     | 2.069273 | 1.988319 | 1.994614 | 1.751941 | 1.71789  | 1.730899  |
| ENSMUSG Atp1a2    | 12.57815 | 13.76447 | 13.06197 | 10.22217 | 11.28364 | 8.981827  |
| ENSMUSG Srarp     | 0        | 0        | 0        | 0        | 0        | 0         |
| ENSMUSG Lrrc8b    | 22.65298 | 20.83261 | 19.74799 | 16.37789 | 17.78087 | 15.481312 |
| ENSMUSG 2010300C  | 7.379697 | 8.260536 | 6.306378 | 7.356695 | 7.407104 | 7.873592  |
| ENSMUSG Asnsd1    | 10.73184 | 11.75512 | 11.18616 | 15.28216 | 13.71334 | 13.129049 |
| ENSMUSG Stk17b    | 18.57752 | 15.10283 | 17.43261 | 14.96635 | 12.72927 | 16.013632 |
| ENSMUSG Ormdl1    | 7.430915 | 7.453137 | 8.50306  | 9.00119  | 8.729871 | 9.835258  |
| ENSMUSG Osgepl1   | 4.219505 | 5.297093 | 4.039848 | 4.376189 | 3.084898 | 3.636489  |
| ENSMUSG Pms1      | 1.192111 | 1.305269 | 1.220522 | 1.629201 | 1.478194 | 1.207278  |
| ENSMUSG Nkg7      | 7.71185  | 4.963556 | 26.22556 | 9.308877 | 4.67356  | 9.972924  |
| ENSMUSG Etfb      | 75.47166 | 74.89183 | 71.73343 | 63.60654 | 77.20843 | 83.11906  |
| Mus_musc Mus_musc | 0.161405 | 0.230992 | 0.39847  | 0.390509 | 0.248678 | 0         |
| Mus_musc Mus_musc | 0        | 0        | 0        | 0.210929 | 0        | 0.726326  |
| Mus_musc Mus_musc | 0.348503 | 0.2812   | 0.060733 | 0.366728 | 0        | 0.390064  |
| Mus_musc Mus_musc | 0        | 0        | 0        | 0.282953 | 0.151782 | 0.427771  |
| Mus_musc Mus_musc | 0.145177 | 0.217098 | 0.399015 | 0.236633 | 0.71585  | 0.194975  |
| Mus_musc Mus_musc | 0.551854 | 0.311973 | 0.208833 | 0.386722 | 1.145612 | 0.426249  |
| Mus_musc Mus_musc | 0.248888 | 0        | 0        | 0.076772 | 0        | 0.212356  |
| Mus_musc Mus_musc | 0.209868 | 0        | 0        | 0.111031 | 0        | 0.107691  |
| Mus_musc Mus_musc | 0        | 0        | 0.052817 | 0.161415 | 0        | 0.230621  |
| Mus_musc Mus_musc | 0.167499 | 0        | 0.045413 | 0.102913 | 0.040818 | 0.128402  |
| ENSMUSG Btdb2     | 19.20832 | 17.06307 | 17.76425 | 15.11651 | 13.97354 | 16.019686 |
| ENSMUSG Csnk1g2   | 66.78688 | 65.26439 | 66.24813 | 55.67985 | 62.74804 | 54.247425 |
| ENSMUSG Abhd17a   | 38.52061 | 31.1198  | 31.03032 | 29.44368 | 35.06203 | 34.400149 |
| ENSMUSG Atp8b3    | 0        | 0        | 0        | 0        | 0        | 0.039033  |
| ENSMUSG Vmn2r29   | 0        | 0.018271 | 0        | 0        | 0.010943 | 0         |
| ENSMUSG Mob3a     | 18.40061 | 16.48656 | 19.58563 | 20.83494 | 19.6777  | 23.45129  |
| Mus_musc Mus_musc | 0.210539 | 0.200102 | 0.063193 | 45.0447  | 20.55106 | 0.324327  |
| ENSMUSG Rpl24     | 224.8794 | 231.8827 | 225.7903 | 262.0102 | 237.8488 | 233.26611 |
| Mus_musc Mus_musc | 0        | 0        | 0        | 0.369723 | 0.096255 | 0.040177  |
| Mus_musc Mus_musc | 0        | 0.012876 | 0.209386 | 2.107465 | 1.41883  | 2.08059   |
| Mus_musc Mus_musc | 0        | 0.062196 | 0        | 0.12843  | 0        | 0.23869   |
| Mus_musc Mus_musc | 0.188031 | 0        | 0        | 0        | 0        | 0         |
| Mus_musc Mus_musc | 0.105727 | 0        | 0.195001 | 0.050514 | 0.070836 | 0         |
| ENSMUSG Olfr952   | 0        | 0        | 0        | 0        | 0        | 0         |
| Mus_musc Mus_musc | 0.277204 | 0.282581 | 0.322869 | 0.234597 | 0.302422 | 0.040567  |
| ENSMUSG Bex4      | 41.46374 | 43.17673 | 42.95832 | 37.76161 | 44.75877 | 35.567806 |
| ENSMUSG Bri3      | 26.67053 | 22.01089 | 23.42564 | 23.65835 | 21.64007 | 23.270617 |
| ENSMUSG Diras2    | 1.224483 | 1.867348 | 0.968577 | 1.758414 | 1.796943 | 1.992529  |
| ENSMUSG Fndc11    | 0.553992 | 0.354885 | 0.262427 | 0.222647 | 0.224963 | 0.480091  |
| Mus_musc Mus_musc | 0.32623  | 0.407504 | 0.364566 | 0.326646 | 0.593422 | 0.327432  |
| ENSMUSG Gm8693    | 0        | 0        | 0        | 0        | 0        | 0         |
| ENSMUSG Gm15091   | 0        | 0        | 0        | 0        | 0        | 0         |
| Mus_musc Mus_musc | 0.224947 | 0.347788 | 0.340752 | 0.38321  | 0.099309 | 0.365146  |
| Mus_musc Mus_musc | 0.278252 | 0.743595 | 0.130724 | 0.732432 | 0.684529 | 0.405648  |
| ENSMUSG Slc38a8   | 0.017276 | 0        | 0        | 0        | 0        | 0         |
| Mus_musc Mus_musc | 0.106551 | 0.160856 | 0        | 0        | 0.139285 | 0.61507   |
| ENSMUSG Rhov      | 0.730154 | 0.702592 | 0.598964 | 1.736687 | 1.591215 | 1.514859  |
| ENSMUSG Gpc1      | 3.789655 | 5.640624 | 6.834336 | 6.626544 | 6.163023 | 7.226713  |
| ENSMUSG BC029722  | 21.86718 | 22.67133 | 21.61766 | 20.601   | 21.72012 | 21.47053  |
| ENSMUSG Cpne1     | 22.19624 | 29.47152 | 18.15209 | 22.46664 | 17.00751 | 14.552814 |

|                   |          |          |          |          |          |           |
|-------------------|----------|----------|----------|----------|----------|-----------|
| ENSMUSG Fam83c    | 0        | 0        | 0.017353 | 0.100984 | 0.107541 | 0.041734  |
| ENSMUSG 6430550D  | 0.384456 | 0.432128 | 0.462813 | 0.481513 | 0.604537 | 0.515073  |
| Mus_musc Mus_musc | 0        | 0        | 0        | 0.250809 | 0        | 0         |
| Mus_musc Mus_musc | 0        | 0        | 0        | 0.359081 | 0        | 0.370322  |
| Mus_musc Mus_musc | 0.681577 | 1.434083 | 1.181757 | 1.241333 | 0.994422 | 0.525668  |
| Mus_musc Mus_musc | 3.362711 | 3.361287 | 4.387227 | 3.542528 | 4.405864 | 3.185244  |
| ENSMUSG Dazap1    | 22.94809 | 23.18642 | 25.58608 | 24.16547 | 22.37315 | 22.640297 |
| ENSMUSG B3gat1    | 0        | 0        | 0        | 0        | 0        | 0         |
| ENSMUSG Smarcd3   | 2.663941 | 2.951925 | 2.901801 | 3.237997 | 2.785834 | 2.508221  |
| ENSMUSG Nol9      | 6.306871 | 5.867264 | 5.462733 | 6.267225 | 5.676177 | 6.537701  |
| ENSMUSG Onecut2   | 0.010391 | 0.003457 | 0        | 0.015568 | 0.004182 | 0.015996  |
| ENSMUSG Rheb      | 46.22923 | 42.44917 | 41.78518 | 38.38459 | 40.65999 | 38.144966 |
| ENSMUSG Prkag2    | 7.911413 | 8.061049 | 7.190455 | 7.709417 | 7.829803 | 8.143133  |
| ENSMUSG Hes3      | 0        | 0        | 0        | 0        | 0        | 0         |
| ENSMUSG Hes2      | 0.585799 | 0.702135 | 0.318372 | 0.784074 | 0.411301 | 0.663319  |
| ENSMUSG Espn      | 2.113932 | 2.181285 | 1.453816 | 1.716598 | 1.72249  | 2.039205  |
| ENSMUSG Nbr1      | 36.6531  | 36.54705 | 32.85202 | 29.80221 | 34.45876 | 30.675435 |
| Mus_musc Mus_musc | 0        | 0        | 0        | 0.254834 | 0        | 0         |
| ENSMUSG Foxc2     | 0.392232 | 0.06782  | 0.324079 | 0.226381 | 0.199024 | 0.195001  |
| ENSMUSG Ifit1bl1  | 1.940162 | 1.769715 | 2.247821 | 1.603701 | 1.741257 | 1.30656   |
| ENSMUSG Vmn1r67   | 0        | 0        | 0        | 0        | 0        | 0         |
| ENSMUSG Igbp1b    | 0        | 0        | 0        | 0        | 0        | 0         |
| ENSMUSG Hmga1     | 8.128315 | 7.396794 | 8.28252  | 13.48032 | 10.64606 | 12.743723 |
| ENSMUSG Lemd1     | 0.016123 | 0        | 0        | 0.919607 | 0.174735 | 0.66863   |
| ENSMUSG Gm11096   | 0        | 0        | 0        | 0        | 0        | 0         |
| ENSMUSG Naa80     | 15.21869 | 12.88988 | 14.17537 | 10.23032 | 10.79038 | 10.660929 |
| ENSMUSG Nxph3     | 2.025884 | 2.277881 | 1.882204 | 2.80258  | 1.482954 | 1.749732  |
| Mus_musc Mus_musc | 0.25764  | 0.240256 | 0.243551 | 0.334421 | 0.372881 | 0.272367  |
| Mus_musc Mus_musc | 0        | 0        | 0        | 0        | 0        | 0         |
| Mus_musc Mus_musc | 0        | 0        | 0        | 0        | 0        | 0.315748  |
| Mus_musc Mus_musc | 0.074355 | 0.069785 | 0.157024 | 2.79271  | 4.106898 | 3.702649  |
| Mus_musc Mus_musc | 0.11021  | 0.54894  | 0.250575 | 0.143834 | 0.235599 | 0.111701  |
| Mus_musc Mus_musc | 0.256418 | 0.484884 | 0.360786 | 0.238694 | 0.374005 | 0.215782  |
| Mus_musc Mus_musc | 0.092865 | 0        | 0.168936 | 0        | 0        | 0         |
| Mus_musc Mus_musc | 0.321526 | 0.241818 | 0.396013 | 0        | 0.085668 | 0         |
| ENSMUSG Plekhh3   | 10.13777 | 8.39211  | 8.199102 | 5.745094 | 5.790244 | 4.843163  |
| ENSMUSG Ccdc186   | 13.73452 | 15.57052 | 11.65731 | 11.74085 | 11.57027 | 12.31703  |
| ENSMUSG Nfkbil1   | 8.060116 | 6.960975 | 8.223667 | 8.461438 | 10.8456  | 9.036109  |
| ENSMUSG 1110059E2 | 15.32589 | 13.6191  | 13.16421 | 14.39395 | 13.20474 | 13.923089 |
| ENSMUSG Nlrp2     | 0        | 0        | 0        | 0        | 0        | 0         |
| ENSMUSG Ppp1r32   | 1.198861 | 1.555076 | 0.980363 | 2.282566 | 2.012173 | 2.191038  |
| ENSMUSG Ccno      | 1.011659 | 1.618642 | 1.074885 | 2.727552 | 1.645382 | 2.56181   |
| ENSMUSG Prdm14    | 0.021047 | 0        | 0        | 0        | 0        | 0         |
| ENSMUSG Shisal2a  | 0        | 0        | 0        | 0        | 0.227958 | 0.284533  |
| ENSMUSG Mrpl2     | 20.37005 | 18.07686 | 21.05919 | 19.66499 | 20.15812 | 18.471587 |
| ENSMUSG Atl2      | 13.54807 | 15.84223 | 13.18319 | 14.68491 | 13.02324 | 13.609497 |
| ENSMUSG Rgs3      | 28.61712 | 27.42897 | 30.52601 | 20.77289 | 19.88708 | 22.38285  |
| ENSMUSG Gnmt      | 5.169683 | 6.735637 | 5.802125 | 2.430257 | 2.357554 | 2.706381  |
| ENSMUSG Mea1      | 26.2725  | 30.34501 | 26.01194 | 27.82868 | 27.79728 | 31.068023 |
| Mus_musc Mus_musc | 0        | 0        | 0.337872 | 0        | 0        | 0         |
| ENSMUSG Cryba1    | 0        | 0        | 0        | 0        | 0        | 0         |
| ENSMUSG Phf1      | 27.96757 | 27.35353 | 30.20495 | 24.11905 | 20.56483 | 20.141891 |
| ENSMUSG E230025N  | 0.096161 | 0.037046 | 0        | 0.273109 | 0.054359 | 0.112376  |
| ENSMUSG Dok7      | 0.499176 | 0.499397 | 0.297672 | 0.371935 | 0.428338 | 0.258345  |
| ENSMUSG Gskip     | 8.10457  | 7.548225 | 7.187986 | 7.621811 | 6.902877 | 7.497941  |
| ENSMUSG Slc38a6   | 2.415181 | 2.106897 | 2.379994 | 4.352066 | 4.662962 | 5.046633  |
| Mus_musc Mus_musc | 0.360913 | 0.724232 | 0.429182 | 0.30909  | 0.178872 | 0.147279  |
| ENSMUSG Eya4      | 1.360599 | 0.87787  | 0.545175 | 0.695824 | 0.953138 | 0.777142  |
| ENSMUSG Dusp1     | 237.2962 | 155.5274 | 284.0239 | 46.81525 | 97.9624  | 71.118286 |
| ENSMUSG Katnal1   | 3.029907 | 3.865559 | 2.653347 | 2.977651 | 2.631556 | 2.708349  |
| ENSMUSG Adgrf1    | 0        | 0        | 0        | 0        | 0        | 0         |
| ENSMUSG Cdk13     | 6.903208 | 7.820196 | 6.518739 | 7.153488 | 6.252098 | 7.090081  |
| ENSMUSG BC117090  | 0        | 0        | 0.326959 | 0        | 0        | 0         |
| ENSMUSG Gm5483    | 1.049161 | 0.493119 | 1.252739 | 0.899083 | 0.309801 | 0.167725  |



|                   |          |          |          |          |          |           |
|-------------------|----------|----------|----------|----------|----------|-----------|
| ENSMUSG C1qtnf5   | 7.314293 | 6.154971 | 7.692112 | 7.318462 | 5.605638 | 6.109036  |
| ENSMUSG Gm14597   | 2.688713 | 3.367758 | 3.713937 | 2.546177 | 2.069851 | 2.14915   |
| ENSMUSG Clec2l    | 0.039371 | 0.077479 | 0.026263 | 0.104068 | 0.049288 | 0.184444  |
| ENSMUSG Vmn1r237  | 0        | 0        | 0        | 0        | 0        | 0         |
| ENSMUSG Fen1      | 4.249732 | 4.291343 | 5.544927 | 8.049966 | 9.356231 | 8.185505  |
| ENSMUSG Iqcf1     | 0        | 0        | 0        | 0        | 0        | 0         |
| ENSMUSG Iqcf5     | 0.229665 | 0        | 0        | 0        | 0        | 0         |
| ENSMUSG Fgf6      | 0        | 0.013603 | 0        | 0        | 0        | 0         |
| ENSMUSG Fgf23     | 0        | 0        | 0        | 0.052867 | 0.211024 | 0.155249  |
| ENSMUSG Lct       | 0        | 0        | 0        | 0        | 0        | 0.017571  |
| ENSMUSG Ntrk2     | 2.273612 | 5.996104 | 3.341178 | 2.359697 | 2.618247 | 3.99551   |
| ENSMUSG Ccnd2     | 25.49951 | 24.15472 | 24.49245 | 22.532   | 23.68424 | 22.394017 |
| ENSMUSG Rasef     | 8.348385 | 12.71941 | 7.528293 | 10.48263 | 9.035985 | 10.548363 |
| ENSMUSG Ccdc85c   | 5.893569 | 6.080131 | 5.88417  | 4.134676 | 3.921551 | 4.606912  |
| Mus_musc Mus_musc | 0.222257 | 0        | 0.430123 | 0.09346  | 0        | 0         |
| Mus_musc Mus_musc | 0        | 0.048257 | 0        | 0.14301  | 0        | 0.111181  |
| Mus_musc Mus_musc | 0.821335 | 1.274743 | 0.864692 | 0.940542 | 0.919662 | 0.803973  |
| Mus_musc Mus_musc | 0.541839 | 0        | 0.700486 | 0        | 0        | 0.149053  |
| Mus_musc Mus_musc | 0        | 0        | 0.033251 | 1.162157 | 0        | 0.061882  |
| ENSMUSG Ankrd13a  | 69.55645 | 69.92541 | 66.24091 | 53.63358 | 56.56382 | 52.894858 |
| ENSMUSG Prokr2    | 0        | 0        | 0        | 0        | 0.012485 | 0         |
| ENSMUSG Il17f     | 0        | 0.039298 | 0        | 0        | 0        | 0         |
| ENSMUSG Hyls1     | 2.061496 | 1.643745 | 1.778411 | 2.014019 | 2.355443 | 2.243515  |
| ENSMUSG Kcnb1     | 1.11315  | 1.327242 | 1.306487 | 1.019351 | 0.819987 | 1.051131  |
| ENSMUSG Ipo9      | 12.11225 | 11.76057 | 10.54243 | 10.22664 | 10.89779 | 13.348433 |
| ENSMUSG Gk2       | 0        | 0        | 0        | 0        | 0        | 0         |
| ENSMUSG Lamtor4   | 16.67444 | 16.66276 | 19.47055 | 16.2473  | 19.01909 | 21.105392 |
| Mus_musc Mus_musc | 0        | 0        | 0        | 0        | 0        | 0         |
| Mus_musc Mus_musc | 3.41201  | 10.91528 | 3.35252  | 3.004713 | 12.15589 | 9.931179  |
| Mus_musc Mus_musc | 0.195424 | 0.054338 | 0        | 0.452442 | 0        | 0         |
| Mus_musc Mus_musc | 0.68542  | 1.516805 | 0.56844  | 1.493806 | 1.167089 | 0.963267  |
| Mus_musc Mus_musc | 3.946839 | 3.153227 | 2.037271 | 4.678786 | 4.131865 | 3.355215  |
| Mus_musc Mus_musc | 0        | 0        | 0        | 0.170465 | 0        | 0         |
| Mus_musc Mus_musc | 0.429097 | 0.477675 | 0.105733 | 0.461001 | 0.656687 | 0.186333  |
| ENSMUSG Olfr667   | 0        | 0        | 0        | 0        | 0        | 0         |
| ENSMUSG Abcd2     | 5.303714 | 4.827408 | 4.544511 | 8.665655 | 10.02829 | 8.780943  |
| ENSMUSG Usp26     | 0        | 0        | 0        | 0        | 0        | 0         |
| Mus_musc Mus_musc | 0.025522 | 0.026762 | 0.136501 | 0.399712 | 0.545783 | 0.574355  |
| Mus_musc Mus_musc | 0        | 0        | 0        | 0        | 0        | 0.283073  |
| Mus_musc Mus_musc | 0.406234 | 0        | 0        | 0        | 0        | 0         |
| ENSMUSG E330017A  | 0        | 0.016294 | 0        | 0.133025 | 0        | 0         |
| ENSMUSG Foxd3     | 0        | 0        | 0        | 0        | 0        | 0         |
| ENSMUSG Omt2b     | 0        | 0        | 0        | 0        | 0        | 0         |
| ENSMUSG Olfr513   | 0        | 0        | 0        | 0        | 0        | 0         |
| ENSMUSG Mrgprd    | 0        | 0        | 0        | 0        | 0        | 0         |
| ENSMUSG Gm5447    | 0.042739 | 0.053873 | 0.046403 | 0.121115 | 0        | 0.047787  |
| ENSMUSG Kcnq3     | 0.012404 | 0.011863 | 0.004243 | 0.025799 | 0.013295 | 0.01215   |
| ENSMUSG Gpr119    | 0        | 0        | 0        | 0        | 0        | 0         |
| ENSMUSG Xylt1     | 8.491001 | 6.893392 | 7.288694 | 5.899072 | 6.057844 | 5.759598  |
| ENSMUSG Bak1      | 13.08915 | 12.89043 | 18.22213 | 20.58939 | 19.50454 | 21.305951 |
| ENSMUSG Ddx49     | 13.43553 | 12.83001 | 13.99487 | 12.97607 | 10.82764 | 12.104306 |
| ENSMUSG Trappc6b  | 56.29781 | 51.29065 | 55.51151 | 43.1187  | 52.11796 | 47.129662 |
| ENSMUSG A730009L  | 0        | 0        | 0        | 0        | 0        | 0         |
| ENSMUSG Gja5      | 20.57326 | 15.75644 | 19.19987 | 15.1411  | 12.06237 | 17.355048 |
| ENSMUSG Cep350    | 7.410936 | 8.306413 | 6.374545 | 7.486617 | 7.703216 | 7.361633  |
| ENSMUSG Gm33543   | 0        | 0.067208 | 0        | 0        | 0        | 0.096051  |
| ENSMUSG Sdhb      | 48.32114 | 47.13382 | 53.83541 | 57.51909 | 53.25661 | 54.015678 |
| ENSMUSG Dlg2      | 0.106761 | 0.071417 | 0.075455 | 0.063072 | 0.16771  | 0.082156  |
| ENSMUSG Insyn1    | 3.415272 | 3.406913 | 3.759626 | 5.184247 | 4.488997 | 5.312742  |
| ENSMUSG Pcnx2     | 0.337708 | 0.400914 | 0.259381 | 0.361908 | 0.237932 | 0.300353  |
| ENSMUSG Ankrd17   | 12.72362 | 13.81988 | 10.68495 | 12.19787 | 13.19819 | 12.874871 |
| ENSMUSG Med20     | 10.70864 | 10.37401 | 12.57406 | 10.24933 | 10.5224  | 9.194808  |
| ENSMUSG Olfr322   | 0        | 0        | 0        | 0        | 0        | 0         |
| ENSMUSG Dtdw2     | 0.68622  | 0.687421 | 0.81396  | 0.942013 | 0.670916 | 0.770727  |

|                   |          |          |          |          |          |           |
|-------------------|----------|----------|----------|----------|----------|-----------|
| ENSMUSG Hsd17b4   | 42.68373 | 44.40304 | 38.74413 | 42.46255 | 43.64175 | 41.770855 |
| ENSMUSG Ppm1k     | 2.86491  | 3.399673 | 3.578011 | 3.406398 | 2.949071 | 2.628882  |
| ENSMUSG Tspan14   | 38.62161 | 38.25893 | 41.34809 | 44.57521 | 46.20155 | 47.191582 |
| ENSMUSG Smim14    | 33.73513 | 29.6698  | 29.28527 | 24.03312 | 23.68649 | 23.093458 |
| ENSMUSG Tgm2      | 150.6971 | 151.8555 | 182.2608 | 135.1666 | 139.9526 | 141.52936 |
| ENSMUSG Ndufa13   | 25.3529  | 28.27976 | 28.46697 | 32.07479 | 29.07365 | 29.370033 |
| ENSMUSG Arhgap36  | 0        | 0.029763 | 0        | 0.046932 | 0.01822  | 0         |
| ENSMUSG Gxylt1    | 13.48552 | 12.06535 | 12.15005 | 10.59988 | 11.48783 | 9.634124  |
| ENSMUSG Slc26a8   | 0.154216 | 0.137953 | 0.041705 | 0.038502 | 0        | 0.018619  |
| ENSMUSG Vmn1r143  | 0        | 0        | 0        | 0        | 0        | 0         |
| ENSMUSG Gm8914    | 0        | 0        | 0        | 0        | 0        | 0         |
| ENSMUSG Rorb      | 0.032313 | 0.051575 | 0.039521 | 0.02807  | 0.010949 | 0.021088  |
| ENSMUSG Zfp873    | 1.499868 | 1.930859 | 1.29838  | 1.734019 | 1.559975 | 2.054089  |
| ENSMUSG Fiz1      | 11.37243 | 13.02255 | 12.85694 | 10.60692 | 10.65983 | 10.546471 |
| ENSMUSG Vmn1r219  | 0        | 0        | 0        | 0        | 0        | 0         |
| ENSMUSG Nr1h5     | 0.101544 | 0.025582 | 0.110777 | 0.074763 | 0.021797 | 0.06302   |
| ENSMUSG Olfr1418  | 0        | 0        | 0        | 0        | 0        | 0         |
| ENSMUSG Ktn1      | 24.02041 | 21.83101 | 20.42728 | 16.66978 | 14.59324 | 14.408349 |
| ENSMUSG Mapk1ip1l | 18.55256 | 18.10663 | 16.13222 | 15.79746 | 16.79629 | 15.961306 |
| ENSMUSG Peli2     | 6.338444 | 6.659439 | 5.505997 | 4.977427 | 4.673189 | 4.443902  |
| ENSMUSG Olfr110   | 0        | 0        | 0        | 0.203939 | 0.161579 | 0.313719  |
| ENSMUSG Gm44501   | 0        | 0        | 0        | 0        | 0        | 0         |
| ENSMUSG D6Ertd527 | 0.788075 | 0.864842 | 1.223986 | 1.118361 | 0.580699 | 1.407662  |
| ENSMUSG Vmn2r41   | 0        | 0        | 0        | 0        | 0        | 0         |
| ENSMUSG Tssk4     | 0.250274 | 0.289402 | 0.42645  | 0.195426 | 0.367304 | 0.24818   |
| ENSMUSG Elof1     | 47.34981 | 49.69593 | 40.03097 | 63.93591 | 58.06792 | 65.006027 |
| ENSMUSG Hapln4    | 0        | 0.010829 | 0.04404  | 0.014313 | 0.084032 | 0.029688  |
| ENSMUSG Magea4    | 0        | 0        | 0        | 0        | 0        | 0         |
| ENSMUSG Plppr5    | 0.023353 | 0        | 0.008646 | 0.050454 | 0        | 0.043463  |
| ENSMUSG Prr27     | 0        | 0        | 0        | 0        | 0        | 0         |
| ENSMUSG Tead3     | 9.010571 | 8.695354 | 9.97561  | 8.028384 | 7.364803 | 7.590337  |
| ENSMUSG Tab1      | 6.161154 | 6.019257 | 6.072686 | 6.669416 | 6.152158 | 6.366441  |
| ENSMUSG Tsga10    | 3.6284   | 3.793215 | 2.793709 | 3.405472 | 3.158939 | 3.266091  |
| ENSMUSG 9130213A  | 0.339753 | 0.111934 | 0.073859 | 0.31104  | 0.198915 | 0.228166  |
| ENSMUSG Gm960     | 0.088146 | 0.076033 | 0.055715 | 0.031695 | 0.082287 | 0.118317  |
| ENSMUSG Fchsd2    | 15.45904 | 15.33601 | 16.29478 | 16.81313 | 16.85382 | 16.405661 |
| ENSMUSG Kik10     | 0.295948 | 0.285133 | 0        | 0.307475 | 0.332729 | 0.450471  |
| ENSMUSG Aldoa     | 283.9536 | 268.7188 | 275.1342 | 271.4525 | 286.8442 | 308.02765 |
| ENSMUSG Ppp4c     | 40.89405 | 39.2702  | 47.18976 | 46.19517 | 41.17268 | 49.699089 |
| ENSMUSG Tbx6      | 0.993335 | 0.709213 | 0.935824 | 0.575836 | 0.516836 | 1.145417  |
| ENSMUSG Vmn1r100  | 0        | 0        | 0        | 0        | 0        | 0         |
| ENSMUSG Lum       | 2.341944 | 2.617774 | 2.916219 | 3.553185 | 3.506049 | 3.461618  |
| ENSMUSG Gm11168   | 0        | 0        | 0        | 0        | 0        | 0         |
| ENSMUSG Gm17617   | 0        | 0        | 0        | 0        | 0        | 0         |
| ENSMUSG Gm19668   | 0        | 0        | 0        | 0        | 0        | 0         |
| ENSMUSG Zfp964    | 1.059694 | 1.291432 | 0.864331 | 1.001406 | 1.045012 | 0.911888  |
| ENSMUSG Lcn8      | 0        | 0        | 0        | 0        | 0        | 0         |
| ENSMUSG 4930522L1 | 1.974765 | 1.523124 | 1.518071 | 2.571806 | 1.321999 | 1.447785  |
| ENSMUSG 5430403G  | 0.539612 | 0.756307 | 0.793762 | 1.178919 | 0.826118 | 0.736525  |
| ENSMUSG Jade3     | 4.551808 | 4.433528 | 4.022328 | 3.293831 | 3.305983 | 3.002405  |
| ENSMUSG Bag4      | 4.057291 | 4.316403 | 4.119707 | 3.863937 | 3.688533 | 4.517549  |
| ENSMUSG Tacc3     | 1.975669 | 2.36662  | 1.763559 | 3.572674 | 4.543736 | 4.696718  |
| ENSMUSG Traf3ip3  | 3.685403 | 2.882413 | 3.496436 | 9.225427 | 6.722178 | 7.454291  |
| ENSMUSG Mob3b     | 3.585195 | 4.5999   | 3.433859 | 5.525806 | 5.438815 | 5.87997   |
| ENSMUSG Notch2    | 16.91079 | 14.42422 | 14.47546 | 12.16061 | 12.47636 | 13.617156 |
| ENSMUSG Sec22b    | 19.43215 | 22.23266 | 23.53879 | 26.46933 | 23.2145  | 26.814955 |
| ENSMUSG Atp6v1g2  | 1.737905 | 1.401631 | 1.364764 | 1.805415 | 1.722749 | 2.800246  |
| ENSMUSG Hao2      | 0        | 0        | 0        | 0.048324 | 0        | 0         |
| ENSMUSG Hsd3b1    | 0        | 0        | 0        | 0.045122 | 0        | 0         |
| ENSMUSG Hmgcs2    | 6.85165  | 8.073032 | 5.123903 | 7.814754 | 9.313962 | 6.555939  |
| ENSMUSG Reg4      | 0        | 0        | 0        | 0        | 0        | 0         |
| ENSMUSG Gm49325   | 0.177848 | 0.121936 | 0.174933 | 0        | 0        | 0         |
| ENSMUSG Art2a-ps  | 0.224381 | 0.219249 | 0.272421 | 0.709078 | 0.298678 | 1.200508  |
| ENSMUSG Pou5f1    | 0        | 0        | 0        | 0        | 0        | 0         |

|                   |          |          |          |          |          |           |
|-------------------|----------|----------|----------|----------|----------|-----------|
| ENSMUSG Ciao2b    | 18.84833 | 24.67623 | 27.73239 | 22.89074 | 21.62178 | 25.407134 |
| ENSMUSG Nae1      | 18.82046 | 15.67758 | 17.31397 | 16.26033 | 12.93237 | 13.644247 |
| ENSMUSG Ces2g     | 10.21138 | 10.72841 | 10.19603 | 7.580567 | 5.97409  | 6.504694  |
| ENSMUSG Gm45711   | 0        | 0        | 0        | 0        | 0        | 0         |
| ENSMUSG Cmtm3     | 25.44789 | 29.67635 | 28.76945 | 38.49016 | 35.81261 | 38.141595 |
| Mus_musc Mus_musc | 0.358374 | 0.229811 | 1.862262 | 1.62325  | 0.406958 | 0.823883  |
| ENSMUSG Bean1     | 0.039761 | 0.059883 | 0.113855 | 0        | 0.041352 | 0.185057  |
| ENSMUSG Cdh5      | 251.4441 | 241.586  | 232.15   | 157.4959 | 167.6857 | 158.79679 |
| ENSMUSG Pgr       | 0.531368 | 0.84124  | 0.551881 | 0.507297 | 0.373656 | 0.502402  |
| ENSMUSG Gm20521   | 0        | 0        | 0        | 0        | 0        | 0         |
| ENSMUSG Gm20403   | 0.144537 | 0.168756 | 0.211101 | 0.089725 | 0.203497 | 0.129391  |
| ENSMUSG Nxph2     | 0        | 0        | 0        | 0        | 0        | 0         |
| Mus_musc Mus_musc | 0.158954 | 0.435089 | 0.105367 | 0.149349 | 0.491752 | 0.233081  |
| ENSMUSG A730071L  | 0        | 0        | 0.01902  | 0        | 0        | 0.071559  |
| ENSMUSG Xkrx      | 0.54533  | 0.27047  | 0.256987 | 0.585459 | 0.243817 | 0.549997  |
| ENSMUSG SrpX2     | 2.517719 | 2.17597  | 2.033984 | 2.03464  | 2.326791 | 2.496144  |
| ENSMUSG Tnmd      | 0        | 0        | 0        | 0.035626 | 0        | 0         |
| ENSMUSG Nox1      | 0.379943 | 0.202737 | 0.531556 | 0.280654 | 0.174423 | 0.161621  |
| ENSMUSG Cstf2     | 9.33503  | 10.3902  | 8.891875 | 9.388579 | 9.201487 | 8.979604  |
| ENSMUSG Sytl4     | 2.932448 | 2.28442  | 2.588633 | 2.364606 | 2.240149 | 2.245887  |
| ENSMUSG Phkb      | 10.36513 | 11.94774 | 9.515631 | 11.90961 | 12.07329 | 13.035313 |
| ENSMUSG A530016L  | 0.161068 | 0.615183 | 0.053385 | 0.188606 | 0.046744 | 0.37536   |
| ENSMUSG Prss23    | 32.72846 | 28.91201 | 42.1605  | 25.56449 | 22.15554 | 23.118465 |
| ENSMUSG A530032D  | 0.748433 | 0.589197 | 1.558726 | 3.291214 | 3.176139 | 3.083729  |
| ENSMUSG Timm10b   | 12.37964 | 12.40938 | 16.52217 | 18.17618 | 24.07754 | 18.789841 |
| ENSMUSG Gm4491    | 0        | 0        | 0        | 0        | 0        | 0         |
| ENSMUSG Lancl2    | 8.431914 | 7.616015 | 7.313948 | 5.987224 | 6.502865 | 5.853934  |
| ENSMUSG 2700097O  | 1.637065 | 1.742765 | 1.92312  | 1.625988 | 1.662238 | 1.870782  |
| ENSMUSG Olfr1465  | 0        | 0        | 0        | 0        | 0        | 0         |
| ENSMUSG Pcdh11x   | 0.004837 | 0.008702 | 0        | 0.011324 | 0        | 0.009354  |
| ENSMUSG Tmub2     | 18.4489  | 18.17846 | 18.72591 | 17.33616 | 18.13206 | 18.178761 |
| ENSMUSG Mast4     | 7.098079 | 8.526116 | 5.740355 | 6.627585 | 6.492628 | 6.962201  |
| ENSMUSG Mbip      | 18.83822 | 15.35282 | 17.43624 | 17.80459 | 14.11821 | 16.23713  |
| ENSMUSG Nfkbia    | 100.276  | 87.05351 | 107.5921 | 56.45628 | 78.87687 | 70.371109 |
| ENSMUSG PsmA6     | 62.07383 | 60.71263 | 65.68552 | 58.7039  | 58.2171  | 56.96349  |
| ENSMUSG Ralgapa1  | 10.70071 | 11.55393 | 10.42875 | 9.579497 | 9.468662 | 9.261742  |
| ENSMUSG Tle6      | 3.116113 | 2.865932 | 3.113575 | 3.739938 | 3.026954 | 3.613234  |
| ENSMUSG 1110008L1 | 2.128615 | 1.915276 | 1.369527 | 2.645654 | 2.94161  | 2.565026  |
| ENSMUSG Ppp2r3c   | 4.166436 | 3.778272 | 3.69904  | 3.675857 | 3.986172 | 4.275673  |
| ENSMUSG Kap       | 0        | 0        | 0        | 0        | 0        | 0         |
| ENSMUSG Bet1      | 14.49727 | 13.65586 | 14.23354 | 16.82137 | 14.35314 | 17.401348 |
| ENSMUSG Slc8b1    | 9.493676 | 8.284213 | 11.23337 | 11.96267 | 12.31245 | 11.743696 |
| ENSMUSG Gab3      | 1.883456 | 1.756029 | 1.929542 | 1.538726 | 1.016554 | 1.47272   |
| ENSMUSG Snx8      | 9.571014 | 9.710819 | 10.72723 | 13.14598 | 12.59531 | 14.683376 |
| ENSMUSG Rpl26     | 12.37064 | 12.66155 | 16.86976 | 15.43156 | 14.70541 | 17.435157 |
| ENSMUSG Foxp2     | 1.883679 | 1.646585 | 1.54532  | 0.904477 | 1.08874  | 0.916484  |
| ENSMUSG 4930519G  | 0        | 0        | 0        | 0        | 0        | 0         |
| ENSMUSG Vmn1r212  | 0        | 0        | 0        | 0        | 0        | 0         |
| ENSMUSG Tmem168   | 12.95195 | 12.56611 | 12.17622 | 12.34887 | 12.10933 | 12.175244 |
| ENSMUSG Nutm2     | 0        | 0        | 0        | 0        | 0        | 0         |
| ENSMUSG Arrdc4    | 10.12248 | 10.63487 | 11.69561 | 14.4756  | 12.92339 | 16.022206 |
| ENSMUSG Dbx2      | 0        | 0        | 0        | 0        | 0        | 0         |
| ENSMUSG Alkbh5    | 29.08131 | 30.19918 | 27.23616 | 23.9501  | 24.05568 | 23.512161 |
| ENSMUSG Retn      | 0.31426  | 2.06975  | 0        | 1.516734 | 0.497209 | 1.241533  |
| ENSMUSG Shisa12b  | 0        | 0        | 0        | 0        | 0        | 0         |
| ENSMUSG Prodh     | 11.97879 | 10.81302 | 11.76494 | 7.946051 | 6.312699 | 7.773155  |
| Mus_musc Mus_musc | 0        | 0        | 0        | 0        | 0.240112 | 0         |
| ENSMUSG Tnfrsf13c | 2.233426 | 1.740596 | 1.319398 | 5.478488 | 4.784097 | 4.752531  |
| ENSMUSG Tex38     | 0.112538 | 0.20395  | 0        | 0        | 0        | 0         |
| ENSMUSG Tceal3    | 0.611776 | 1.379234 | 0.930057 | 0.765297 | 1.04541  | 0.610323  |
| ENSMUSG 9930012K  | 6.353024 | 6.393871 | 6.502741 | 4.95515  | 4.137853 | 3.872565  |
| ENSMUSG Crb2      | 0.440834 | 0.418393 | 0.364228 | 0.365957 | 0.143066 | 0.394318  |
| ENSMUSG Emsy      | 8.37839  | 10.05615 | 8.075376 | 7.421161 | 7.376833 | 8.431003  |
| ENSMUSG Kank4     | 6.988475 | 7.285457 | 7.54181  | 4.336976 | 4.498527 | 5.004162  |

|                    |          |          |          |          |          |           |
|--------------------|----------|----------|----------|----------|----------|-----------|
| ENSMUSG Trim47     | 10.17995 | 9.275004 | 9.132469 | 9.055302 | 10.31485 | 10.599853 |
| ENSMUSG Unk        | 9.022279 | 8.402837 | 9.041516 | 7.050701 | 6.832144 | 6.718695  |
| ENSMUSG Smim12     | 17.63411 | 17.51727 | 20.27647 | 16.35854 | 16.61142 | 16.649031 |
| ENSMUSG Fbf1       | 8.443773 | 8.881672 | 8.036375 | 8.141761 | 7.431154 | 8.684553  |
| ENSMUSG Acox1      | 32.86378 | 34.64718 | 30.37042 | 29.83544 | 30.70288 | 32.344827 |
| ENSMUSG Gzmk       | 1.534249 | 0.65414  | 1.545063 | 1.573974 | 1.880757 | 4.248947  |
| ENSMUSG Mrpl38     | 18.54688 | 21.15016 | 20.74006 | 17.83561 | 19.67243 | 17.18989  |
| ENSMUSG Ten1       | 10.97581 | 9.741632 | 11.12618 | 10.88274 | 10.71316 | 11.243556 |
| ENSMUSG Dlgap3     | 0.135336 | 0.044015 | 0.041762 | 0.05249  | 0.26342  | 0.075084  |
| ENSMUSG Trp53inp1  | 18.65454 | 21.13706 | 16.76866 | 33.05447 | 33.00682 | 26.824253 |
| ENSMUSG Ccne2      | 1.177577 | 1.171572 | 1.426973 | 1.070021 | 1.269012 | 1.838442  |
| ENSMUSG Gem        | 14.16802 | 9.841191 | 15.88277 | 8.55603  | 8.54724  | 9.477355  |
| ENSMUSG Cdh17      | 0.062134 | 0.067508 | 0.084858 | 0.296159 | 0.278151 | 0.298571  |
| ENSMUSG Fam92a     | 6.697042 | 8.263782 | 5.626325 | 6.489034 | 7.284282 | 7.205884  |
| ENSMUSG Tmem87a    | 21.39228 | 20.98941 | 19.40698 | 18.06776 | 19.0575  | 18.544147 |
| ENSMUSG Alg3       | 7.712938 | 6.215957 | 6.521231 | 5.408238 | 6.16697  | 6.678375  |
| ENSMUSG Ephx4      | 0.331739 | 0.690953 | 0.482438 | 0.604499 | 0.993902 | 1.100043  |
| ENSMUSG Slc52a3    | 11.56628 | 10.38811 | 10.50895 | 7.682896 | 8.128941 | 7.451452  |
| ENSMUSG Olfr1221   | 0        | 0        | 0        | 0        | 0        | 0         |
| ENSMUSG Olfr1222   | 0        | 0        | 0        | 0        | 0        | 0         |
| ENSMUSG Angpt4     | 0.286194 | 0.285092 | 0.40769  | 0.546716 | 0.088589 | 0.207298  |
| ENSMUSG Olfr1216   | 0        | 0        | 0        | 0        | 0        | 0         |
| ENSMUSG Rbck1      | 43.00381 | 39.14686 | 45.05334 | 38.63573 | 35.93961 | 34.871095 |
| ENSMUSG Olfr1218   | 0        | 0        | 0        | 0        | 0        | 0         |
| ENSMUSG Olfr1219   | 0        | 0        | 0        | 0        | 0        | 0         |
| ENSMUSG Tpx2       | 0.783726 | 0.691183 | 1.153653 | 2.199935 | 3.486058 | 3.885644  |
| ENSMUSG Defb22     | 0        | 0        | 0        | 0        | 0        | 0         |
| ENSMUSG Hap1       | 5.905479 | 5.829752 | 7.282576 | 6.59862  | 5.104963 | 5.734119  |
| ENSMUSG P3h4       | 11.01036 | 8.564977 | 7.747569 | 5.774571 | 7.377562 | 7.337917  |
| ENSMUSG Cttnb1     | 265.9082 | 253.9652 | 235.9034 | 252.7042 | 268.7547 | 291.34894 |
| ENSMUSG Sohlh2     | 0.023862 | 0        | 0        | 0        | 0        | 0         |
| ENSMUSG Dclk1      | 0.768757 | 0.903391 | 0.554964 | 1.895082 | 1.757749 | 1.857458  |
| ENSMUSG Smad9      | 5.305163 | 5.130007 | 4.523763 | 2.719294 | 2.795655 | 2.410411  |
| ENSMUSG Sis        | 0        | 0        | 0        | 0        | 0        | 0         |
| ENSMUSG Ccna1      | 0.297114 | 0.155027 | 0.181319 | 1.946479 | 2.113074 | 2.161692  |
| ENSMUSG Bche       | 1.526749 | 1.506541 | 1.377197 | 1.193398 | 1.494952 | 1.058777  |
| ENSMUSG Nbea       | 5.877086 | 6.221752 | 4.823422 | 4.506529 | 4.302845 | 4.608315  |
| ENSMUSG Rpl23a     | 337.1786 | 339.0568 | 358.3556 | 393.255  | 348.7504 | 369.004   |
| ENSMUSG Gm11555    | 0        | 0        | 0        | 0        | 0        | 0         |
| ENSMUSG Fancd2os   | 0        | 0        | 0        | 0.023102 | 0        | 0         |
| ENSMUSG Gm21304    | 0        | 0        | 0        | 0        | 0        | 0         |
| ENSMUSG Olfr388-ps | 0        | 0        | 0        | 0        | 0        | 0         |
| ENSMUSG Ppp3r2     | 0.018207 | 0.06257  | 0.029421 | 0.051469 | 0.027146 | 0.050642  |
| ENSMUSG Eif1ad     | 11.61184 | 10.68578 | 11.02998 | 9.935624 | 10.52891 | 10.550426 |
| ENSMUSG Cabp4      | 0.216413 | 0.249634 | 0.181697 | 0.111025 | 0.100848 | 0         |
| ENSMUSG Chka       | 22.36274 | 24.2229  | 23.65087 | 18.22151 | 17.97497 | 18.342345 |
| ENSMUSG Banf1      | 41.15868 | 39.26666 | 39.6022  | 33.77771 | 38.27931 | 35.402003 |
| ENSMUSG Smc2       | 2.693696 | 3.329041 | 3.169123 | 3.908186 | 4.845868 | 4.693749  |
| ENSMUSG Cst6       | 0.012528 | 0.029214 | 0.012838 | 0.033737 | 0.03388  | 0         |
| ENSMUSG Aip        | 50.16809 | 55.48779 | 59.95851 | 49.63356 | 47.88179 | 47.684982 |
| ENSMUSG Plk1       | 0.979336 | 0.553029 | 1.150441 | 3.01905  | 3.457162 | 3.928804  |
| ENSMUSG Ern2       | 0        | 0.11773  | 0        | 1.321554 | 1.147058 | 1.37147   |
| ENSMUSG Chp2       | 0.600512 | 1.328798 | 0.320932 | 3.210216 | 2.186839 | 3.523321  |
| ENSMUSG Cpxm2      | 0.393318 | 0.190482 | 0.237047 | 0.689088 | 0.589726 | 0.623491  |
| ENSMUSG Acadsb     | 16.73616 | 19.04896 | 16.65319 | 14.53215 | 14.09411 | 12.972877 |
| ENSMUSG Ndufab1    | 10.26826 | 11.64016 | 13.04172 | 14.48082 | 14.64404 | 14.647395 |
| ENSMUSG Dctn5      | 26.80701 | 28.5156  | 28.98026 | 28.32805 | 31.27282 | 29.410156 |
| ENSMUSG Pgf        | 2.145209 | 1.563397 | 3.348951 | 2.41898  | 3.999354 | 2.463883  |
| ENSMUSG Ulk2       | 18.19131 | 18.97933 | 17.22396 | 15.02812 | 14.89489 | 13.982921 |
| ENSMUSG Gm6970     | 0.175327 | 0.115153 | 0        | 0.500362 | 0.591753 | 0.393816  |
| ENSMUSG Rfx5       | 5.358731 | 4.51026  | 5.228221 | 6.291943 | 5.329759 | 5.80209   |
| ENSMUSG Psmb4      | 85.4822  | 88.25565 | 91.59689 | 88.86224 | 86.49317 | 88.655869 |
| ENSMUSG Il13       | 0        | 0        | 0        | 0.433944 | 0.778221 | 0.387479  |
| Mus_musc Mus_musc  | 0        | 0.308619 | 0        | 0        | 0        | 0         |

|                   |          |          |          |          |          |           |
|-------------------|----------|----------|----------|----------|----------|-----------|
| Mus_musc Mus_musc | 0        | 0.158934 | 0.055703 | 0        | 0        | 0.27704   |
| Mus_musc Mus_musc | 0        | 0.181677 | 0        | 0        | 0        | 0         |
| Mus_musc Mus_musc | 0        | 0.176875 | 0        | 0.385455 | 0        | 0         |
| Mus_musc Mus_musc | 0        | 0        | 0        | 0.174016 | 0        | 0         |
| ENSMUSG Depdc7    | 1.513857 | 1.698687 | 1.599125 | 1.473823 | 1.525674 | 1.37296   |
| Mus_musc Mus_musc | 0        | 0        | 0.305863 | 0.06521  | 0        | 0         |
| Mus_musc Mus_musc | 0.103686 | 0.070982 | 0.196942 | 0.058668 | 0.405656 | 0         |
| ENSMUSG Vsx1      | 0        | 0        | 0        | 0        | 0        | 0         |
| ENSMUSG Dio2      | 0.248143 | 0.17729  | 0.041195 | 0.276092 | 0.453166 | 0.355988  |
| ENSMUSG Gdpd5     | 5.704145 | 4.901864 | 4.971829 | 4.613011 | 4.738759 | 4.962004  |
| ENSMUSG Dpy19l2   | 0.125154 | 0.095132 | 0.014724 | 0.148586 | 0.16242  | 0.118474  |
| ENSMUSG Clec1a    | 53.50034 | 56.43015 | 51.889   | 31.17281 | 36.4231  | 27.961611 |
| ENSMUSG Gal3st2   | 0.019438 | 0.018701 | 0        | 0.017806 | 0        | 0.009715  |
| ENSMUSG Cstf3     | 6.956229 | 7.536038 | 6.803383 | 6.985819 | 7.397013 | 8.108641  |
| ENSMUSG Rbmy      | 0        | 0        | 0        | 0        | 0        | 0         |
| ENSMUSG Tet1      | 0.602081 | 0.690894 | 0.424364 | 0.369971 | 0.381903 | 0.45444   |
| ENSMUSG Dmrta2    | 0.096525 | 0.012833 | 0.034689 | 0.04538  | 0.02856  | 0.044313  |
| ENSMUSG Zfp654    | 5.689911 | 5.444484 | 4.790867 | 4.751829 | 4.652961 | 4.837639  |
| ENSMUSG Gm15922   | 5.036436 | 4.969298 | 6.440879 | 8.293994 | 9.429062 | 10.827653 |
| ENSMUSG Olfr1052  | 0        | 0        | 0        | 0        | 0        | 0         |
| ENSMUSG Prl7a1    | 0        | 0        | 0        | 0        | 0        | 0         |
| ENSMUSG Rdh1      | 0.077003 | 0.017102 | 0.051669 | 0.082795 | 0.022516 | 0.073078  |
| Mus_musc Mus_musc | 0        | 0.308619 | 0        | 0        | 0        | 0         |
| Mus_musc Mus_musc | 0        | 0.0694   | 0        | 0.127233 | 0.228586 | 0         |
| ENSMUSG Slc1a7    | 0.104678 | 0.254274 | 0.065451 | 0.058218 | 0.044454 | 0.159318  |
| Mus_musc Mus_musc | 0.224493 | 0        | 0        | 0.140743 | 0.207145 | 0.364729  |
| Mus_musc Mus_musc | 0        | 0        | 0.26279  | 0        | 0        | 0         |
| Mus_musc Mus_musc | 0        | 0.09213  | 0        | 0.298838 | 0        | 0.178746  |
| ENSMUSG Fam129c   | 1.761512 | 1.208649 | 1.867101 | 1.843395 | 0.727169 | 1.71948   |
| Mus_musc Mus_musc | 0.968162 | 0.938125 | 0.748259 | 1.345928 | 1.095455 | 0.426816  |
| Mus_musc Mus_musc | 0        | 0        | 0        | 0        | 0        | 0.184231  |
| Mus_musc Mus_musc | 0        | 0.382583 | 0.129613 | 0.247034 | 0        | 0.267439  |
| Mus_musc Mus_musc | 0        | 0.572818 | 0.638592 | 0.248007 | 0        | 0.191305  |
| Mus_musc Mus_musc | 0        | 0.033755 | 0.07391  | 0        | 0        | 0         |
| Mus_musc Mus_musc | 0        | 0        | 0        | 0.0777   | 0.22186  | 0         |
| Mus_musc Mus_musc | 0.178003 | 0        | 0.185909 | 0        | 0        | 0.235397  |
| Mus_musc Mus_musc | 0.05299  | 0.162463 | 0.441271 | 0.281944 | 0.429428 | 0.423361  |
| ENSMUSG Eps8l1    | 16.71687 | 13.21619 | 14.41464 | 12.05478 | 11.56914 | 12.496212 |
| Mus_musc Mus_musc | 0        | 0        | 0        | 0.656665 | 0        | 0         |
| ENSMUSG E2f3      | 1.831366 | 1.79058  | 2.010476 | 2.462607 | 2.588251 | 2.813431  |
| Mus_musc Mus_musc | 0.226183 | 0.481959 | 0.50424  | 0.451697 | 0.291726 | 0.360034  |
| Mus_musc Mus_musc | 0.188031 | 0.369145 | 0        | 0        | 0.031436 | 0         |
| ENSMUSG Gm10058   | 0        | 0        | 0        | 0        | 0        | 0         |
| Mus_musc Mus_musc | 0.096185 | 0.55943  | 0.439069 | 0.397585 | 0.156893 | 0.129285  |
| ENSMUSG Gm3488    | 0.117556 | 0.075343 | 0.14395  | 0.034803 | 0        | 0.076736  |
| ENSMUSG Gm21119   | 0.018813 | 0        | 0.00493  | 0        | 0        | 0         |
| Mus_musc Mus_musc | 1.607061 | 2.007499 | 2.530113 | 2.276364 | 2.036762 | 1.476359  |
| Mus_musc Mus_musc | 1.286334 | 1.398348 | 1.159036 | 1.691926 | 1.24987  | 1.194124  |
| Mus_musc Mus_musc | 0.048205 | 0.035681 | 0.420034 | 0.163326 | 0.297401 | 0.349099  |
| Mus_musc Mus_musc | 1.086712 | 1.109644 | 0.75701  | 0.49009  | 0.641795 | 0.80068   |
| Mus_musc Mus_musc | 0.776222 | 0.577556 | 0.808523 | 0.547092 | 0.363376 | 0.193321  |
| Mus_musc Mus_musc | 1.883315 | 1.696897 | 1.993977 | 1.93728  | 1.582227 | 1.536501  |
| Mus_musc Mus_musc | 0.319208 | 1.009579 | 0.885538 | 0.63398  | 0.813056 | 0.771277  |
| Mus_musc Mus_musc | 0        | 0        | 0        | 0        | 0        | 0         |
| Mus_musc Mus_musc | 0        | 0        | 0.291269 | 0        | 0        | 0         |
| ENSMUSG Rpl10     | 509.6117 | 499.7472 | 528.7715 | 525.448  | 532.5803 | 537.66572 |
| ENSMUSG Rps15a    | 36.32912 | 31.48966 | 58.03944 | 41.49513 | 45.84119 | 41.125869 |
| ENSMUSG Tbc1d10a  | 24.6277  | 21.75855 | 23.1697  | 16.98388 | 17.92359 | 17.935987 |
| ENSMUSG Neurl1b   | 2.673567 | 2.819368 | 2.587703 | 2.036722 | 2.387239 | 2.065489  |
| ENSMUSG Pkd1l2    | 0.003843 | 0        | 0        | 0.066601 | 0.052958 | 0.05631   |
| Mus_musc Mus_musc | 0.188031 | 0.003872 | 0        | 0        | 0        | 0         |
| ENSMUSG Ubl3      | 83.84882 | 83.99138 | 88.51761 | 66.40989 | 69.33771 | 65.346892 |
| ENSMUSG Nptx2     | 0.320973 | 0.20536  | 0.35759  | 0.384606 | 0.320307 | 0.220573  |
| ENSMUSG Lypd6     | 0.393008 | 0.572958 | 0.307895 | 0.207666 | 0.247481 | 0.275414  |

|                    |          |          |          |          |          |           |
|--------------------|----------|----------|----------|----------|----------|-----------|
| ENSMUSG Fcrl1      | 2.011491 | 1.276169 | 1.422348 | 4.176654 | 2.971083 | 4.032537  |
| ENSMUSG Cnn3       | 121.8619 | 112.9295 | 127.6448 | 73.59034 | 72.34116 | 69.871391 |
| ENSMUSG Tiam1      | 5.965409 | 5.541946 | 4.0867   | 5.275321 | 5.662688 | 5.914517  |
| ENSMUSG Serinc3    | 354.8354 | 375.1773 | 429.8526 | 299.1098 | 323.0537 | 271.34729 |
| Mus_musc Mus_musc  | 0.162808 | 0.076026 | 0        | 0        | 0        | 0.413296  |
| Mus_musc Mus_musc  | 0        | 0.367388 | 0        | 0        | 0        | 0         |
| Mus_musc Mus_musc  | 0        | 0        | 0        | 0        | 0        | 0.101084  |
| Mus_musc Mus_musc  | 0.158854 | 0        | 0        | 0        | 0        | 0         |
| Mus_musc Mus_musc  | 0.291049 | 0.216338 | 0.143262 | 0.255867 | 0        | 0.125963  |
| Mus_musc Mus_musc  | 0.438779 | 0.559714 | 0.366564 | 0.341844 | 0.488994 | 0.426643  |
| ENSMUSG Gm14419    | 0.552083 | 0.574086 | 0.053832 | 0.434692 | 0.1612   | 1.03077   |
| ENSMUSG Gm14408    | 0        | 0        | 0        | 0        | 0        | 0         |
| ENSMUSG Gm14295    | 1.873849 | 1.965465 | 1.335192 | 1.244678 | 1.754462 | 2.069039  |
| ENSMUSG Gm14410    | 9.654932 | 10.60132 | 11.01997 | 8.664784 | 10.96498 | 8.444592  |
| ENSMUSG Gm14401    | 0        | 0        | 0        | 0        | 0        | 0.152386  |
| ENSMUSG Arid3a     | 2.504451 | 2.377204 | 2.18672  | 6.999701 | 6.282178 | 6.421682  |
| ENSMUSG Gm14305    | 5.878196 | 5.34519  | 4.149306 | 4.328797 | 3.968996 | 4.643597  |
| ENSMUSG Zfp973     | 3.082153 | 2.871402 | 0.658443 | 2.373142 | 1.263809 | 1.006806  |
| Mus_musc Mus_musc  | 0.938688 | 0.403084 | 0.200263 | 0.318932 | 0.109774 | 0.449493  |
| Mus_musc Mus_musc  | 2.180227 | 1.789083 | 2.762223 | 1.303379 | 0.874637 | 0.762484  |
| Mus_musc Mus_musc  | 2.944517 | 2.547113 | 2.514107 | 2.965688 | 2.278462 | 2.51147   |
| Mus_musc Mus_musc  | 0.512086 | 0.441803 | 0.355476 | 0.302369 | 0.06661  | 0.060089  |
| Mus_musc Mus_musc  | 0.070341 | 0.217152 | 0.123945 | 0.180688 | 0.051268 | 0.26874   |
| Mus_musc Mus_musc  | 0        | 0        | 0        | 0        | 0        | 0         |
| Mus_musc Mus_musc  | 0.211908 | 0        | 0        | 0        | 0        | 0         |
| Mus_musc Mus_musc  | 0.234064 | 0.083887 | 0.167184 | 0.136108 | 0        | 0.111582  |
| ENSMUSG Stx3       | 15.7965  | 17.57115 | 17.69119 | 13.4023  | 13.31465 | 13.967364 |
| ENSMUSG Serpina3g  | 12.28653 | 8.880128 | 65.00768 | 113.471  | 71.78674 | 60.994083 |
| ENSMUSG Zfp281     | 10.02358 | 9.10873  | 8.92902  | 8.05405  | 7.694236 | 7.143986  |
| ENSMUSG Piezo2     | 6.655343 | 5.998243 | 5.588583 | 4.171304 | 3.903828 | 3.839277  |
| ENSMUSG 4933411K   | 0.257385 | 0.633339 | 0.205294 | 0.226221 | 0.063042 | 0.43484   |
| ENSMUSG Vmn2r79    | 0        | 0        | 0        | 0        | 0        | 0         |
| ENSMUSG Gm3512     | 0.28624  | 0.033278 | 0.066948 | 0.024888 | 0.060191 | 0.035135  |
| ENSMUSG Gm9970     | 0.049781 | 0        | 0        | 0.043343 | 0        | 0.064438  |
| ENSMUSG Gm3043     | 0        | 0        | 0        | 0        | 0        | 0         |
| ENSMUSG Pcdh9      | 0.030565 | 0.063016 | 0.022824 | 0        | 0        | 0.005903  |
| ENSMUSG Gzmg       | 0        | 0        | 0        | 0        | 0        | 0         |
| ENSMUSG Stac3      | 0.156835 | 0.204838 | 0.176586 | 0.180922 | 0.07847  | 0.105583  |
| ENSMUSG Olfr414    | 0        | 0        | 0        | 0        | 0        | 0         |
| ENSMUSG BC052040   | 1.165829 | 1.196044 | 0.859462 | 1.011435 | 1.153987 | 1.190589  |
| ENSMUSG Btnl9      | 0.14385  | 0.236014 | 0.243937 | 0.229369 | 0.127318 | 0.119007  |
| ENSMUSG Siglech    | 1.254384 | 1.242276 | 0.991908 | 1.006342 | 0.937097 | 1.203311  |
| ENSMUSG Wdfy4      | 7.135762 | 5.66616  | 5.344752 | 9.834638 | 8.99499  | 11.350142 |
| ENSMUSG Hey1       | 51.7904  | 44.10439 | 39.61214 | 25.13252 | 30.44904 | 23.394884 |
| ENSMUSG Gm6583     | 0.050523 | 0.170756 | 0.06128  | 0.044887 | 0.022992 | 0.047016  |
| ENSMUSG Ufsp1      | 1.951937 | 1.616155 | 2.602627 | 1.615816 | 1.422246 | 1.775612  |
| ENSMUSG Map3k4     | 8.254336 | 7.811188 | 8.09112  | 7.696044 | 6.944883 | 7.46371   |
| ENSMUSG Olfr1464-r | 0        | 0        | 0        | 0        | 0        | 0         |
| Mus_musc Mus_musc  | 0.175551 | 0.147055 | 0        | 0.140426 | 0.077272 | 0.18765   |
| ENSMUSG Gemin6     | 2.594137 | 1.837015 | 1.728393 | 2.722417 | 2.439512 | 2.530206  |
| ENSMUSG Eef1d      | 61.84256 | 60.38274 | 53.02918 | 45.20606 | 46.68852 | 46.047755 |
| ENSMUSG Cmtm5      | 0        | 0.042277 | 0        | 0.070083 | 0        | 0         |
| ENSMUSG Myh6       | 9.669604 | 41.29212 | 8.986663 | 16.75664 | 13.14431 | 11.305542 |
| ENSMUSG Lat2       | 1.971256 | 1.212431 | 4.339585 | 13.02781 | 9.37566  | 11.761836 |
| ENSMUSG Hist1h2af  | 0.086476 | 0.220829 | 0.579209 | 0.110995 | 0.465561 | 0.829762  |
| ENSMUSG Pcdhga9    | 1.611855 | 1.74396  | 1.846685 | 1.255683 | 0.727287 | 1.183975  |
| ENSMUSG Lztf1      | 5.833729 | 6.130842 | 5.540525 | 5.915084 | 5.789178 | 5.32546   |
| ENSMUSG Nt5dc2     | 27.00942 | 26.87211 | 34.22528 | 16.85216 | 19.6699  | 19.471857 |
| ENSMUSG Tbl1x      | 19.24674 | 20.16563 | 18.48977 | 17.33883 | 17.00596 | 17.747673 |
| ENSMUSG Fyco1      | 13.55521 | 12.84721 | 10.08261 | 11.93056 | 10.57455 | 12.363187 |
| ENSMUSG Sacm1l     | 26.68388 | 27.04333 | 24.79989 | 23.3985  | 23.76481 | 22.503987 |
| ENSMUSG Slc6a20b   | 0        | 0.013132 | 0.047537 | 0.030239 | 0.083086 | 0.086617  |
| ENSMUSG Olfr910    | 0        | 0        | 0        | 0        | 0        | 0         |
| ENSMUSG Hmx3       | 0        | 0        | 0        | 0        | 0        | 0         |

|                    |          |          |          |          |          |           |
|--------------------|----------|----------|----------|----------|----------|-----------|
| ENSMUSG Olfr60     | 0        | 0.028056 | 0.042595 | 0.148922 | 0.062441 | 0.051445  |
| ENSMUSG Clic5      | 288.9487 | 288.4048 | 286.7896 | 149.9791 | 152.7162 | 146.70041 |
| ENSMUSG Polh       | 5.236827 | 4.436281 | 4.376591 | 4.424284 | 5.151843 | 4.569289  |
| ENSMUSG Gtpbp2     | 25.03141 | 24.16955 | 30.85385 | 24.38149 | 20.86981 | 24.579995 |
| ENSMUSG Vegfa      | 291.5679 | 207.6834 | 269.6933 | 124.0194 | 116.1529 | 129.55281 |
| ENSMUSG Gm17622    | 0        | 0        | 0        | 0.262958 | 0.468805 | 0         |
| ENSMUSG Clec4b2    | 0        | 0        | 0.088641 | 0.373231 | 0.288944 | 0.184657  |
| ENSMUSG Xlr4b      | 1.304677 | 0.827274 | 1.27761  | 3.376994 | 3.74528  | 2.579602  |
| ENSMUSG Gm4302     | 0        | 0        | 0        | 0        | 0        | 0         |
| ENSMUSG Zfy1       | 0        | 0.096471 | 0        | 0        | 0        | 0         |
| ENSMUSG Tas2r136   | 0        | 0        | 0        | 0        | 0        | 0         |
| ENSMUSG Btn2a2     | 0        | 0        | 0        | 0        | 0        | 0.041423  |
| ENSMUSG Raet1e     | 0        | 0        | 0        | 0        | 0        | 0         |
| ENSMUSG Olfr1279   | 0        | 0        | 0        | 0        | 0        | 0         |
| ENSMUSG Ndufb5     | 25.61925 | 29.04496 | 25.12936 | 32.05201 | 33.526   | 29.619117 |
| ENSMUSG Reg3d      | 0        | 0        | 0        | 0        | 0        | 0         |
| ENSMUSG Gml        | 0        | 0        | 0        | 0        | 0        | 0         |
| ENSMUSG Olfr537-ps | 0        | 0        | 0        | 0        | 0        | 0         |
| ENSMUSG Gm39115    | 0        | 0        | 0        | 0        | 0        | 0         |
| ENSMUSG Adgrf5     | 237.1153 | 229.1246 | 215.1137 | 151.9056 | 167.1345 | 142.26058 |
| ENSMUSG Foxk1      | 14.22784 | 11.87839 | 11.54403 | 9.08632  | 8.805122 | 8.479945  |
| ENSMUSG Prcc       | 17.939   | 17.31954 | 17.70731 | 17.00086 | 18.53151 | 17.354355 |
| ENSMUSG Msl2       | 17.47634 | 19.13315 | 17.74954 | 16.3357  | 17.40381 | 15.739185 |
| ENSMUSG Hapln2     | 0        | 0.011544 | 0        | 0.040173 | 0.077579 | 0.064589  |
| ENSMUSG P4ha1      | 28.22968 | 37.88339 | 38.33416 | 23.46091 | 29.95132 | 27.280557 |
| ENSMUSG 10-Sep     | 10.55    | 10.60298 | 10.52487 | 7.334902 | 9.029606 | 9.734017  |
| ENSMUSG V1rd19     | 0        | 0        | 0        | 0        | 0        | 0         |
| ENSMUSG Sim1       | 0        | 0        | 0        | 0        | 0.007615 | 0         |
| ENSMUSG Zfp354a    | 2.199823 | 2.461179 | 1.870233 | 1.405235 | 0.951605 | 0.970519  |
| ENSMUSG Gm14781    | 0        | 0        | 0        | 0        | 0        | 0         |
| ENSMUSG Mapk9      | 14.38039 | 13.23259 | 14.17168 | 12.34102 | 11.93959 | 13.464405 |
| ENSMUSG Hspa4      | 33.45844 | 36.19292 | 31.02135 | 30.93307 | 32.18162 | 33.174683 |
| ENSMUSG Tstd1      | 0.69031  | 1.362255 | 2.562974 | 1.174849 | 0.277444 | 1.433045  |
| ENSMUSG Gfpt2      | 3.127243 | 5.755547 | 3.169545 | 2.861803 | 2.813625 | 3.822849  |
| ENSMUSG Cnot6      | 25.59671 | 23.35759 | 21.47625 | 20.59829 | 23.33128 | 21.332296 |
| ENSMUSG Olfr96     | 0        | 0        | 0        | 0        | 0        | 0         |
| ENSMUSG Mocs1      | 18.06882 | 16.59036 | 15.88698 | 14.7801  | 15.50907 | 14.906794 |
| ENSMUSG Med14      | 6.735712 | 7.200152 | 6.386315 | 6.470955 | 6.801892 | 6.727796  |
| ENSMUSG Vmn2r89    | 0        | 0        | 0        | 0        | 0        | 0         |
| ENSMUSG Prr36      | 0.519907 | 0.515591 | 0.358294 | 0.305772 | 0.278542 | 0.497514  |
| ENSMUSG Olfr1383   | 0.006767 | 0.012558 | 0        | 0        | 0        | 0         |
| ENSMUSG Tubg2      | 1.108789 | 0.589977 | 1.122913 | 0.743686 | 0.655552 | 0.874412  |
| ENSMUSG Olfr774    | 0        | 0        | 0        | 0        | 0        | 0         |
| ENSMUSG Olfr5      | 0        | 0        | 0        | 0        | 0        | 0         |
| ENSMUSG Lhx8       | 0        | 0        | 0        | 0        | 0        | 0         |
| ENSMUSG Frmd6      | 29.67245 | 30.02074 | 25.97919 | 16.3893  | 20.11228 | 15.703083 |
| ENSMUSG Zfp738     | 1.530709 | 1.586236 | 1.32449  | 1.575908 | 1.560494 | 1.42958   |
| ENSMUSG Dleu7      | 0.029522 | 0        | 0        | 0        | 0        | 0         |
| ENSMUSG Gm21874    | 0        | 0        | 0        | 0        | 0        | 0         |
| ENSMUSG Kcnk9      | 0        | 0        | 0        | 0        | 0        | 0         |
| ENSMUSG Dner       | 0.211587 | 0.180013 | 0.07191  | 0.16084  | 0.160272 | 0.203457  |
| ENSMUSG Dnajc12    | 2.558537 | 3.668631 | 2.426868 | 2.84013  | 2.08863  | 1.96376   |
| ENSMUSG Kif15      | 0.267959 | 0.205195 | 0.553019 | 0.930143 | 0.936119 | 1.709978  |
| ENSMUSG Wdr44      | 4.927075 | 5.495961 | 5.68972  | 4.677151 | 5.111014 | 4.330352  |
| ENSMUSG Gm49527    | 0        | 0        | 0        | 0        | 0        | 0         |
| ENSMUSG Cldn15     | 4.573393 | 6.374427 | 4.690083 | 4.793982 | 2.86234  | 5.275173  |
| ENSMUSG P2ry10b    | 1.693862 | 1.168756 | 1.715981 | 2.369471 | 2.610573 | 2.667452  |
| ENSMUSG 1300017J0  | 0        | 0        | 0.04253  | 0.114253 | 0        | 0.047256  |
| ENSMUSG Nemf       | 9.546386 | 9.492211 | 10.51844 | 9.716468 | 8.740132 | 9.160329  |
| ENSMUSG Sec23a     | 10.0842  | 10.13576 | 9.697116 | 10.63508 | 9.78983  | 9.971853  |
| ENSMUSG L2hgdh     | 3.346847 | 4.154523 | 3.361905 | 2.813799 | 2.568445 | 2.785707  |
| ENSMUSG Qsox1      | 61.3243  | 61.64035 | 73.73966 | 65.37763 | 75.94582 | 68.115703 |
| ENSMUSG Ucp2       | 217.1508 | 176.4871 | 174.6481 | 177.445  | 184.8531 | 177.27894 |
| ENSMUSG Des        | 28.6054  | 29.74051 | 35.38406 | 27.2945  | 26.72675 | 27.573647 |

|                   |          |          |          |          |          |           |
|-------------------|----------|----------|----------|----------|----------|-----------|
| ENSMUSG Dnpep     | 18.79019 | 19.77283 | 18.19025 | 21.04832 | 25.83258 | 24.055403 |
| ENSMUSG Tmem28    | 1.896332 | 2.295296 | 2.028012 | 2.140813 | 2.093447 | 2.2108    |
| ENSMUSG Glb1l     | 3.107988 | 3.223896 | 3.41448  | 3.600627 | 3.722309 | 3.702198  |
| ENSMUSG Csf2rb    | 12.32711 | 10.91556 | 12.65982 | 25.97778 | 28.78295 | 30.960365 |
| ENSMUSG Tuba4a    | 15.26141 | 14.97514 | 15.0236  | 11.7929  | 14.29904 | 15.229045 |
| ENSMUSG Dnajb2    | 23.5411  | 26.71897 | 26.06824 | 19.04693 | 22.05131 | 21.053381 |
| ENSMUSG Ptprn     | 1.012059 | 0.882502 | 1.029327 | 0.599313 | 0.567326 | 0.729541  |
| ENSMUSG Slc23a3   | 0.404646 | 0.283812 | 0.269937 | 0.337383 | 0.253948 | 0.439578  |
| ENSMUSG Csf2rb2   | 4.567435 | 4.149584 | 4.21959  | 11.74945 | 11.57928 | 13.927629 |
| ENSMUSG Speg      | 1.86252  | 2.683306 | 2.27771  | 5.726694 | 4.85291  | 6.602211  |
| ENSMUSG Abtb1     | 14.35474 | 13.91356 | 15.39613 | 13.44815 | 12.73172 | 11.583466 |
| ENSMUSG Sec61a1   | 49.48294 | 47.17947 | 49.8784  | 59.56451 | 64.77568 | 65.21743  |
| ENSMUSG Plxna1    | 41.45541 | 37.10271 | 37.1469  | 32.3514  | 34.915   | 34.979422 |
| ENSMUSG Klf15     | 24.63552 | 32.40234 | 25.9161  | 9.526336 | 12.02494 | 9.613772  |
| ENSMUSG Chchd6    | 9.779648 | 9.104632 | 8.766934 | 9.320177 | 7.265522 | 7.715121  |
| ENSMUSG Slc41a3   | 3.211499 | 2.474493 | 3.232457 | 2.971103 | 3.214507 | 3.010575  |
| ENSMUSG Aldh1l1   | 3.144113 | 4.238792 | 3.264254 | 4.735392 | 3.214599 | 5.001885  |
| ENSMUSG Mucl3     | 0.110715 | 0.053133 | 0        | 0.065481 | 0.042076 | 0.021225  |
| ENSMUSG H2-Q6     | 56.42637 | 39.57611 | 148.6962 | 93.595   | 57.5943  | 71.543415 |
| ENSMUSG H2-BI     | 0.648408 | 0.425308 | 1.015697 | 0.71334  | 2.216398 | 0.83524   |
| ENSMUSG Gm6034    | 0.034765 | 0.086295 | 0.241229 | 0.125961 | 0        | 0.089506  |
| ENSMUSG Trim10    | 0.939694 | 1.162944 | 1.623285 | 0.511357 | 0.46378  | 0.534216  |
| ENSMUSG Gm8909    | 5.04482  | 3.529356 | 4.952062 | 5.730155 | 4.828455 | 6.422339  |
| ENSMUSG 4931406C  | 14.95499 | 17.05249 | 12.23124 | 15.8603  | 15.04652 | 14.437062 |
| ENSMUSG Taf1d     | 7.567076 | 6.428028 | 6.890481 | 9.219304 | 6.8991   | 8.488747  |
| ENSMUSG Gpr83     | 0.096225 | 0.081372 | 0.079898 | 0.08531  | 0.080847 | 0.047356  |
| ENSMUSG Izumo1r   | 0.512664 | 0.234206 | 0.970292 | 1.232957 | 1.384199 | 0.940789  |
| ENSMUSG Wwp2      | 9.607835 | 9.799491 | 9.524076 | 9.011844 | 8.788562 | 9.462809  |
| ENSMUSG Ankrd49   | 4.291965 | 4.805903 | 5.409365 | 4.135387 | 3.811599 | 3.959874  |
| ENSMUSG Heph1     | 0        | 0.033554 | 0        | 0.032481 | 0.01494  | 0         |
| ENSMUSG Vstm5     | 0.114745 | 0.194611 | 0.316405 | 0.250667 | 0.116085 | 0.404081  |
| ENSMUSG Panx1     | 1.207229 | 1.059032 | 1.279282 | 1.598356 | 1.987498 | 1.826214  |
| ENSMUSG Med17     | 10.38468 | 8.829173 | 9.628372 | 8.096597 | 8.346211 | 7.963954  |
| ENSMUSG Cyp3a16   | 0        | 0        | 0        | 0        | 0        | 0         |
| ENSMUSG Csmc1     | 0.102846 | 0.094738 | 0.107601 | 0.293074 | 0.246891 | 0.18103   |
| ENSMUSG Rnh1      | 68.77373 | 65.5213  | 66.44325 | 86.69875 | 90.80422 | 100.86877 |
| ENSMUSG Sycp2l    | 0        | 0        | 0        | 0        | 0        | 0         |
| ENSMUSG Ceacam14  | 0        | 0        | 0        | 0        | 0        | 0         |
| ENSMUSG Vwa5a     | 27.02073 | 27.63282 | 28.30292 | 28.32826 | 27.44779 | 27.874338 |
| ENSMUSG Ddr1      | 19.17367 | 19.13329 | 15.53451 | 17.21581 | 16.33105 | 17.420659 |
| ENSMUSG Ric1      | 9.036232 | 10.10623 | 8.185915 | 9.270658 | 9.219701 | 9.852774  |
| ENSMUSG Dgcr6     | 22.34041 | 20.50229 | 24.24305 | 18.97203 | 20.26677 | 21.145134 |
| ENSMUSG Ltbr      | 39.27558 | 39.08247 | 38.54121 | 30.3875  | 31.92089 | 33.820339 |
| ENSMUSG Ing4      | 22.3205  | 21.46164 | 25.06023 | 21.75798 | 20.61606 | 21.085514 |
| ENSMUSG Vamp1     | 4.056462 | 3.470587 | 3.481615 | 5.315019 | 3.55787  | 4.091205  |
| ENSMUSG Cd27      | 3.898124 | 2.359478 | 4.862637 | 3.380397 | 3.24095  | 3.239622  |
| ENSMUSG Mrpl51    | 6.757509 | 7.015016 | 7.899207 | 7.457483 | 7.160145 | 7.046535  |
| ENSMUSG Pou4f2    | 0        | 0        | 0        | 0        | 0        | 0         |
| ENSMUSG Slc10a7   | 7.56091  | 7.071748 | 7.740645 | 6.783364 | 7.125917 | 7.343225  |
| ENSMUSG Smad1     | 9.127263 | 8.645884 | 10.14    | 6.937376 | 7.445223 | 7.342687  |
| ENSMUSG 1700011L2 | 0        | 0        | 0        | 0        | 0        | 0         |
| ENSMUSG Lsm6      | 5.443036 | 5.570021 | 5.663113 | 6.140944 | 6.504744 | 6.097562  |
| ENSMUSG Avil      | 0.320949 | 0.418097 | 0.441795 | 0.216882 | 0.149619 | 0.15232   |
| ENSMUSG Ror1      | 1.609101 | 1.393952 | 1.386144 | 1.424414 | 1.343135 | 1.151819  |
| ENSMUSG Psd4      | 5.637911 | 4.516659 | 6.244417 | 10.95431 | 8.938023 | 9.308301  |
| ENSMUSG Pax8      | 0        | 0        | 0        | 0        | 0        | 0.021584  |
| Mus_musc Mus_musc | 0.239145 | 0.365574 | 0.280598 | 0.764173 | 0.55783  | 0.424321  |
| ENSMUSG Zmynd19   | 3.069423 | 3.549074 | 3.438801 | 2.704763 | 2.987868 | 3.484532  |
| ENSMUSG Dph7      | 6.642404 | 5.810529 | 6.265238 | 6.2127   | 4.185528 | 5.054212  |
| ENSMUSG Arrdc1    | 28.55193 | 28.23135 | 33.12539 | 29.75523 | 24.64152 | 27.599628 |
| ENSMUSG Rbms1     | 46.43466 | 39.79763 | 45.51656 | 35.40633 | 34.64452 | 34.840153 |
| ENSMUSG Itgb6     | 4.143057 | 4.134096 | 4.565844 | 4.217092 | 5.107867 | 4.795766  |
| ENSMUSG Olfr855   | 0        | 0        | 0        | 0        | 0        | 0         |
| ENSMUSG Tmem82    | 0.950481 | 0.810978 | 1.078903 | 1.624107 | 0.81909  | 1.175134  |



|                   |          |          |          |          |          |           |
|-------------------|----------|----------|----------|----------|----------|-----------|
| ENSMUSG Retreg1   | 23.73396 | 22.54431 | 19.82924 | 18.99854 | 17.30831 | 17.563693 |
| ENSMUSG Mmp1a     | 0        | 0        | 0        | 0        | 0        | 0         |
| ENSMUSG Myo10     | 21.80506 | 23.31045 | 18.82836 | 15.53527 | 16.94338 | 16.224253 |
| ENSMUSG Flg       | 0        | 0        | 0        | 0.018971 | 0        | 0         |
| ENSMUSG 4930430Fc | 2.236372 | 2.470727 | 2.761951 | 1.994036 | 2.491308 | 2.186408  |
| ENSMUSG Duxbl1    | 0        | 0.016356 | 0        | 0.028422 | 0.051326 | 0.031316  |
| ENSMUSG Olfr938   | 0        | 0        | 0        | 0        | 0        | 0         |
| ENSMUSG Defb15    | 0        | 0        | 0        | 0        | 0        | 0         |
| ENSMUSG Unc119b   | 17.7367  | 20.38417 | 20.08932 | 17.02445 | 17.17261 | 20.22311  |
| ENSMUSG Arsj      | 2.009485 | 2.073718 | 1.875677 | 1.505134 | 2.127925 | 1.815659  |
| ENSMUSG Olfr1189  | 0        | 0        | 0        | 0        | 0        | 0         |
| ENSMUSG Olfr1188  | 0        | 0        | 0        | 0        | 0        | 0         |
| ENSMUSG Olfr1259  | 0.012956 | 0        | 0        | 0        | 0        | 0         |
| ENSMUSG Srp14     | 79.83728 | 83.87621 | 94.41685 | 80.21395 | 78.63316 | 84.606934 |
| ENSMUSG Dhx34     | 5.718623 | 5.365484 | 5.512107 | 5.351343 | 5.059676 | 4.63454   |
| ENSMUSG Prg4      | 0.324053 | 0.871502 | 0.194548 | 0.223103 | 0.105232 | 0.368315  |
| ENSMUSG Odr4      | 14.62736 | 12.94299 | 12.43552 | 12.6353  | 12.58836 | 11.158465 |
| ENSMUSG Prkce     | 19.19711 | 16.27043 | 16.31085 | 10.87634 | 11.20723 | 10.965384 |
| ENSMUSG Megf8     | 10.20628 | 9.243985 | 9.370187 | 7.872056 | 8.351573 | 8.166229  |
| ENSMUSG Ncapg2    | 0.826866 | 1.020973 | 0.730437 | 1.369084 | 1.914164 | 2.686497  |
| ENSMUSG Ankrd34b  | 0.060397 | 0.054328 | 0.061588 | 0.121026 | 0.078343 | 0.053241  |
| ENSMUSG Tmem232   | 0.793767 | 1.356677 | 0.758165 | 2.167181 | 1.814127 | 1.563795  |
| ENSMUSG Olfr1443  | 0        | 0        | 0        | 0        | 0        | 0         |
| ENSMUSG Cetn4     | 3.229102 | 4.567146 | 3.121609 | 6.376333 | 6.462636 | 5.911694  |
| ENSMUSG Wdr73     | 6.311684 | 4.64988  | 5.04849  | 5.217493 | 4.454785 | 4.75373   |
| ENSMUSG Nmb       | 1.804792 | 2.516177 | 1.361074 | 2.648724 | 2.272235 | 1.997995  |
| ENSMUSG Cachd1    | 4.257681 | 5.068317 | 4.749304 | 3.289796 | 3.849068 | 3.301407  |
| ENSMUSG Izumo3    | 0        | 0        | 0        | 0        | 0        | 0         |
| ENSMUSG Slc28a1   | 0        | 0.011338 | 0        | 0        | 0        | 0.051082  |
| ENSMUSG A930017K  | 0        | 0        | 0        | 0        | 0.016548 | 0         |
| ENSMUSG Sec11a    | 32.04517 | 32.65619 | 34.82948 | 34.00547 | 33.78793 | 33.780609 |
| ENSMUSG St3gal3   | 8.042135 | 7.538662 | 7.260165 | 7.499904 | 8.18132  | 8.516525  |
| ENSMUSG Artn      | 0.726355 | 0.501749 | 0.66439  | 0.610794 | 0.6063   | 0.308726  |
| ENSMUSG Pigq      | 25.26352 | 24.12952 | 23.24124 | 22.71641 | 23.75244 | 21.923263 |
| ENSMUSG Slc6a18   | 0        | 0        | 0        | 0        | 0        | 0         |
| ENSMUSG Hapln1    | 0.049188 | 0.05789  | 0.060923 | 0.057153 | 0.057788 | 0.059494  |
| ENSMUSG Clptm1l   | 40.24765 | 37.30814 | 38.85906 | 56.16483 | 59.84756 | 59.26321  |
| ENSMUSG Tert      | 0.515833 | 0.379101 | 0.416994 | 0.665651 | 0.646822 | 0.604925  |
| ENSMUSG Vcan      | 0.285947 | 0.593379 | 0.410332 | 0.73373  | 0.930181 | 1.263867  |
| ENSMUSG Xrcc4     | 7.483042 | 5.835314 | 5.851561 | 5.899818 | 7.039469 | 5.129516  |
| ENSMUSG Crebl2    | 21.96573 | 23.89583 | 22.87262 | 15.5099  | 16.94159 | 14.365493 |
| ENSMUSG Atg10     | 2.46498  | 2.423169 | 2.396001 | 2.593918 | 2.776867 | 2.231179  |
| ENSMUSG 3-Mar     | 3.744295 | 3.287816 | 3.287581 | 4.146364 | 4.243838 | 4.247064  |
| ENSMUSG Fam189b   | 3.623153 | 3.5996   | 4.693596 | 4.335904 | 4.135111 | 4.562358  |
| ENSMUSG Phox2a    | 0.031093 | 0        | 0        | 0        | 0        | 0.050379  |
| ENSMUSG Ttc9b     | 0.001472 | 0        | 0.035406 | 0        | 0        | 0         |
| ENSMUSG Gm10639   | 0        | 0.168865 | 0.088806 | 0        | 0        | 0         |
| ENSMUSG Gm10638   | 0.756666 | 0.431283 | 0.605773 | 0.382588 | 0.279154 | 0.269907  |
| ENSMUSG Plekhf1   | 1.197963 | 1.797558 | 1.140375 | 1.561318 | 1.51727  | 2.013765  |
| ENSMUSG Gm21704   | 0        | 0        | 0.012863 | 0        | 0        | 0         |
| ENSMUSG Mss51     | 0.159507 | 0.255886 | 0.358689 | 0.447429 | 0.206834 | 0.256005  |
| ENSMUSG Gm10406   | 0        | 0        | 0        | 0        | 0.024447 | 0         |
| ENSMUSG Eml6      | 0.92349  | 1.040312 | 0.792613 | 0.928673 | 1.093959 | 0.851641  |
| ENSMUSG Fam19a2   | 0.034944 | 0.09045  | 0.041344 | 0.011963 | 0.050994 | 0.025324  |
| ENSMUSG Klf8      | 1.564345 | 1.252127 | 1.051935 | 1.070357 | 1.392023 | 1.284038  |
| ENSMUSG Ddx24     | 32.20972 | 30.94881 | 32.57515 | 26.73885 | 27.11968 | 26.822512 |
| ENSMUSG Slc5a12   | 1.799917 | 1.716789 | 0.466453 | 0.665907 | 0.662975 | 0.437076  |
| ENSMUSG Kif21b    | 4.162837 | 2.62148  | 4.375604 | 5.647898 | 4.510406 | 5.918069  |
| Mus_musc Mus_musc | 0        | 0.127523 | 0.052487 | 0.371234 | 0.371037 | 0.457106  |
| Mus_musc Mus_musc | 0        | 0        | 0        | 0.174016 | 0        | 0         |
| Mus_musc Mus_musc | 0.157129 | 0.263486 | 0        | 0        | 0        | 0.153916  |
| Mus_musc Mus_musc | 0.360138 | 0        | 0.304461 | 0.138693 | 0.204137 | 0.111216  |
| ENSMUSG Znhit1    | 19.485   | 18.93979 | 19.50447 | 20.75585 | 20.03065 | 19.59075  |
| Mus_musc Mus_musc | 0.240198 | 0.112074 | 0.363366 | 0.345893 | 0.145387 | 0.546252  |

|                   |          |          |          |          |          |           |
|-------------------|----------|----------|----------|----------|----------|-----------|
| ENSMUSG Gss       | 14.23128 | 14.61333 | 13.83396 | 12.35704 | 12.16136 | 14.242464 |
| ENSMUSG Procr     | 7.661174 | 7.241231 | 7.074691 | 7.606192 | 6.969925 | 8.709253  |
| ENSMUSG Mmp24     | 0        | 0        | 0        | 0.012358 | 0        | 0         |
| ENSMUSG Eif6      | 33.65845 | 34.56653 | 37.9729  | 33.30853 | 33.32197 | 31.892949 |
| ENSMUSG Ttn       | 0.047208 | 0.318934 | 0.046664 | 0.10477  | 0.104741 | 0.086594  |
| ENSMUSG Hps3      | 6.243288 | 6.272939 | 7.703965 | 7.12756  | 6.855142 | 5.557618  |
| ENSMUSG Taf10     | 10.1418  | 11.05488 | 12.05367 | 11.15898 | 9.648952 | 11.016946 |
| ENSMUSG Nfs1      | 16.93569 | 17.25501 | 16.9003  | 15.31179 | 18.32902 | 17.950507 |
| ENSMUSG Wfdc21    | 0.652478 | 1.60342  | 0.480339 | 3.206869 | 6.386685 | 5.57991   |
| ENSMUSG Tex47     | 0        | 0        | 0        | 0        | 0        | 0         |
| ENSMUSG Pvr       | 11.30574 | 11.6474  | 12.08388 | 7.654554 | 8.646008 | 9.901739  |
| ENSMUSG Hif3a     | 1.258964 | 1.668771 | 1.557043 | 0.657722 | 1.211494 | 0.626431  |
| ENSMUSG Myct1     | 25.53368 | 24.13121 | 23.21165 | 17.06588 | 14.36527 | 13.07185  |
| ENSMUSG Olfr1451  | 0        | 0        | 0        | 0        | 0        | 0         |
| ENSMUSG Fmo9      | 0        | 0        | 0        | 0        | 0        | 0         |
| ENSMUSG Tada1     | 5.612841 | 5.766788 | 5.916795 | 4.702094 | 5.356993 | 6.282871  |
| ENSMUSG Pou2f1    | 3.634472 | 3.468133 | 3.279227 | 3.35559  | 3.262536 | 3.416339  |
| ENSMUSG Dusp27    | 0.085904 | 0.251555 | 0.080364 | 0.012906 | 0.135185 | 0.04599   |
| ENSMUSG Adcy10    | 0        | 0        | 0        | 0        | 0        | 0         |
| ENSMUSG Mpzl1     | 11.85117 | 13.22066 | 11.44222 | 12.69562 | 13.18112 | 12.474591 |
| ENSMUSG Mpc2      | 26.22593 | 30.26524 | 27.78022 | 32.41882 | 28.94314 | 30.153157 |
| Mus_musc Mus_musc | 0.236997 | 0.275333 | 0.133349 | 0.552062 | 0.356127 | 0.264811  |
| Mus_musc Mus_musc | 0.57597  | 0.56773  | 0.439271 | 0.391823 | 0.404825 | 0.33105   |
| Mus_musc Mus_musc | 0        | 0        | 0        | 0.07623  | 0.170673 | 0.239737  |
| Mus_musc Mus_musc | 0.051266 | 0.310488 | 0.242321 | 0.095588 | 0.136626 | 0.017356  |
| Mus_musc Mus_musc | 0.188566 | 0        | 0        | 0.11238  | 0.076748 | 0         |
| ENSMUSG Meox2     | 6.580224 | 6.01695  | 7.586808 | 5.915222 | 5.133723 | 5.819036  |
| ENSMUSG Ryr3      | 0.072635 | 0.121508 | 0.083039 | 0.111394 | 0.071864 | 0.057429  |
| ENSMUSG Gm13697   | 0        | 0        | 0        | 0        | 0        | 0         |
| ENSMUSG Gm9117    | 0        | 0        | 0        | 0        | 0        | 0         |
| ENSMUSG Tcstv3    | 0        | 0        | 0        | 0        | 0        | 0         |
| ENSMUSG Yipf1     | 19.83438 | 19.69648 | 20.55102 | 22.62462 | 20.10188 | 24.870861 |
| ENSMUSG Speer1    | 0        | 0        | 0        | 0.127142 | 0        | 0         |
| ENSMUSG Gm6509    | 0        | 0        | 0        | 0        | 0        | 0         |
| ENSMUSG Olfr474   | 0        | 0        | 0        | 0        | 0        | 0         |
| ENSMUSG Magea3    | 0        | 0        | 0        | 0        | 0        | 0         |
| ENSMUSG Olfr452   | 0        | 0        | 0        | 0        | 0        | 0         |
| ENSMUSG 9430069I0 | 0        | 0.520791 | 0        | 0.297234 | 0        | 0.199876  |
| ENSMUSG 1700015G  | 0        | 0        | 0        | 0        | 0        | 0         |
| ENSMUSG Sgo2b     | 0        | 0        | 0        | 0        | 0        | 0         |
| ENSMUSG Zfp955a   | 2.995955 | 3.791052 | 3.520893 | 3.267492 | 3.076262 | 3.339727  |
| ENSMUSG Olfr153   | 0        | 0        | 0        | 0        | 0        | 0         |
| ENSMUSG Btg1-ps2  | 0        | 0        | 0        | 0        | 0        | 0         |
| ENSMUSG 4921509C: | 0        | 0        | 0        | 0        | 0        | 0         |
| ENSMUSG Olfr972   | 0        | 0        | 0        | 0        | 0        | 0         |
| ENSMUSG Krt5      | 0        | 0.0833   | 0.040908 | 0.156158 | 0.08863  | 0.025151  |
| Mus_musc Mus_musc | 0.102303 | 0.273669 | 0.192031 | 0.198502 | 0.154103 | 0.166286  |
| Mus_musc Mus_musc | 0        | 0        | 0        | 0.328332 | 0        | 0         |
| Mus_musc Mus_musc | 0.878897 | 0.494873 | 0.520939 | 0.182736 | 0.11198  | 0.257239  |
| Mus_musc Mus_musc | 0.486075 | 0        | 0.04898  | 0.176433 | 0.246654 | 0.062355  |
| Mus_musc Mus_musc | 0        | 0        | 0.221033 | 0        | 0        | 0         |
| Mus_musc Mus_musc | 0        | 0        | 0.168952 | 0        | 0        | 0         |
| Mus_musc Mus_musc | 0.301951 | 0.226113 | 0.236716 | 0.069113 | 0.22509  | 0         |
| Mus_musc Mus_musc | 0.375951 | 0.397215 | 0.398243 | 0.495412 | 0.214935 | 0.349723  |
| Mus_musc Mus_musc | 0.120465 | 0        | 0.163345 | 0        | 0.276728 | 0.097971  |
| Mus_musc Mus_musc | 0.349381 | 0.321555 | 0.441293 | 0.404822 | 0.377899 | 0.566014  |
| Mus_musc Mus_musc | 0.338226 | 0        | 0.137369 | 0        | 0        | 0.059     |
| ENSMUSG Gab2      | 11.28504 | 9.877527 | 10.9129  | 8.94314  | 8.607604 | 9.370885  |
| ENSMUSG Hsf2bp    | 0.266013 | 0.078556 | 0.06682  | 0.084428 | 0.081137 | 0.03482   |
| ENSMUSG Gapt      | 0.522562 | 0.663701 | 0.732411 | 3.089061 | 4.499656 | 4.471124  |
| ENSMUSG Naa11     | 0        | 0        | 0.0112   | 0        | 0        | 0         |
| ENSMUSG Olfr1348  | 0        | 0        | 0        | 0        | 0        | 0         |
| ENSMUSG Pnlip     | 0        | 0        | 0        | 0        | 0        | 0         |
| ENSMUSG Gm4187    | 0        | 0        | 0        | 0        | 0        | 0         |

|                   |          |          |          |          |          |           |
|-------------------|----------|----------|----------|----------|----------|-----------|
| ENSMUSG Cyp2j7    | 0        | 0        | 0        | 0        | 0        | 0         |
| ENSMUSG Scn1a     | 0.006727 | 0        | 0        | 0        | 0        | 0         |
| ENSMUSG Man1a2    | 11.65573 | 13.14802 | 11.95044 | 12.84245 | 12.898   | 12.350359 |
| ENSMUSG Zswim7    | 4.36685  | 2.092978 | 3.190862 | 3.145485 | 3.870296 | 4.216783  |
| ENSMUSG Pigl      | 3.370508 | 3.142159 | 2.901057 | 2.793728 | 2.306339 | 2.435315  |
| ENSMUSG Siva1     | 11.98833 | 12.10405 | 12.38116 | 14.19215 | 11.68673 | 11.8931   |
| Mus_musc Mus_musc | 0.321633 | 0.299143 | 0.16538  | 0        | 0        | 0.089508  |
| Mus_musc Mus_musc | 2.673077 | 2.235723 | 2.533078 | 1.873466 | 2.694788 | 3.203947  |
| Mus_musc Mus_musc | 0.176408 | 0.21267  | 0.10089  | 0.472083 | 0.170499 | 0.465877  |
| Mus_musc Mus_musc | 0        | 0.12949  | 0.056509 | 0        | 0.351843 | 0.439213  |
| Mus_musc Mus_musc | 2.552107 | 1.878012 | 2.384994 | 2.533927 | 2.402728 | 2.784656  |
| ENSMUSG Gm10130   | 0        | 0        | 0        | 0.954227 | 0        | 0         |
| ENSMUSG Gm21876   | 0        | 0        | 0        | 0        | 0        | 0         |
| Mus_musc Mus_musc | 0.167139 | 0        | 0.174192 | 0.116011 | 0        | 0         |
| ENSMUSG Olfr382   | 0        | 0        | 0        | 0        | 0        | 0         |
| ENSMUSG Gm8024    | 0        | 0.013334 | 0        | 0        | 0.042138 | 0         |
| ENSMUSG Rem2      | 1.080203 | 0.940398 | 1.237046 | 0.504314 | 0.571869 | 0.76319   |
| ENSMUSG Haus4     | 5.420951 | 5.561964 | 6.357174 | 4.786099 | 6.567024 | 7.280078  |
| ENSMUSG Kikb1     | 0.026401 | 0.041039 | 0.051463 | 0.073034 | 0.143763 | 0.029019  |
| ENSMUSG Lcp2      | 4.392875 | 3.8219   | 6.795022 | 9.023002 | 8.609101 | 9.947835  |
| ENSMUSG Lrp10     | 40.6208  | 34.99999 | 38.58739 | 38.50914 | 39.12633 | 39.661141 |
| ENSMUSG Tes3-ps   | 0.52608  | 0.449086 | 0.391956 | 0.253206 | 0.178932 | 0.404118  |
| ENSMUSG Gm10945   | 0        | 0        | 0        | 0        | 0        | 0         |
| ENSMUSG Gm10944   | 0        | 0        | 0        | 0        | 0        | 0         |
| ENSMUSG Ercc6     | 2.883569 | 3.334968 | 2.84107  | 3.147021 | 3.003058 | 3.245848  |
| ENSMUSG Nrip2     | 0.122932 | 0.518464 | 0.266344 | 0.190204 | 0.25457  | 0.28236   |
| ENSMUSG Tulp3     | 10.09396 | 10.97136 | 11.30434 | 9.815186 | 9.277974 | 9.016434  |
| ENSMUSG Plekhn1   | 9.67782  | 9.720231 | 10.43145 | 8.415544 | 9.039474 | 9.32817   |
| ENSMUSG Ankrd65   | 1.365867 | 2.043653 | 1.477599 | 3.046504 | 1.785205 | 2.939386  |
| ENSMUSG Tubb5     | 98.8687  | 92.44682 | 122.5285 | 109.1948 | 112.8705 | 129.13595 |
| ENSMUSG Gm17631   | 0        | 0        | 0        | 0        | 0        | 0         |
| ENSMUSG Esp6      | 0        | 0        | 0        | 0        | 0        | 0         |
| ENSMUSG Vmn2r4    | 0        | 0        | 0        | 0        | 0        | 0         |
| ENSMUSG Vmn2r85   | 0.091218 | 0.088869 | 0.083594 | 0.04835  | 0.062388 | 0.062522  |
| ENSMUSG Gm28827   | 0        | 0        | 0        | 0        | 0        | 0         |
| ENSMUSG Gm11757   | 0        | 0        | 0        | 0        | 0        | 0         |
| ENSMUSG Fam181a   | 0        | 0.144012 | 0.076908 | 0.12251  | 0.118804 | 0.038551  |
| ENSMUSG Gm11084   | 0.218007 | 0.333218 | 0.183626 | 0.161406 | 0        | 0         |
| ENSMUSG 2310009B  | 4.081968 | 3.374628 | 4.027884 | 5.373546 | 3.647871 | 4.160776  |
| ENSMUSG Mycn      | 1.531903 | 1.229416 | 1.014615 | 1.193893 | 1.038596 | 0.859806  |
| ENSMUSG Ttbk1     | 0.065196 | 0.089501 | 0.077374 | 0.096409 | 0.165421 | 0.179786  |
| ENSMUSG Spaca5    | 0        | 0        | 0        | 0        | 0        | 0         |
| ENSMUSG Zfp318    | 3.110046 | 2.824371 | 2.701033 | 2.689418 | 2.359661 | 2.664091  |
| ENSMUSG Mgarp     | 0        | 0        | 0        | 0.074102 | 0        | 0.078433  |
| ENSMUSG Slc22a7   | 0        | 0        | 0        | 0        | 0        | 0         |
| ENSMUSG Gata5     | 4.045172 | 3.885867 | 3.21886  | 2.380548 | 1.783091 | 2.00396   |
| ENSMUSG Polr1c    | 19.41821 | 20.79661 | 22.58333 | 23.5739  | 26.62834 | 26.68437  |
| ENSMUSG Pcmt1     | 29.43983 | 31.35635 | 32.32816 | 25.71067 | 26.09637 | 24.650316 |
| ENSMUSG Lrp11     | 1.482782 | 1.21795  | 1.274073 | 1.689231 | 1.318446 | 1.908215  |
| ENSMUSG 1700021FC | 6.860961 | 7.816302 | 8.284844 | 6.627588 | 7.769549 | 5.439491  |
| ENSMUSG Stxbp5    | 4.894488 | 5.594887 | 5.136367 | 5.298977 | 5.256261 | 5.478045  |
| ENSMUSG Hint3     | 11.55709 | 12.02879 | 8.657895 | 14.71632 | 11.56726 | 10.638815 |
| ENSMUSG Trmt11    | 3.204015 | 2.945197 | 2.966538 | 2.6152   | 2.65985  | 2.226754  |
| ENSMUSG Vsig10    | 6.813032 | 7.472816 | 6.673855 | 7.070536 | 6.69664  | 6.646967  |
| ENSMUSG Olfr872   | 0        | 0.024403 | 0        | 0        | 0        | 0         |
| ENSMUSG Olfr18    | 0.02675  | 0        | 0        | 0        | 0        | 0         |
| ENSMUSG Fbxl12    | 6.610879 | 6.322028 | 6.475871 | 5.18022  | 5.152919 | 4.990871  |
| ENSMUSG Loxl3     | 2.69968  | 2.23046  | 3.588549 | 2.487215 | 2.311785 | 2.528477  |
| ENSMUSG Hoxb6     | 4.039446 | 3.464718 | 4.101316 | 1.709895 | 2.646153 | 2.176256  |
| ENSMUSG Olfr870   | 0        | 0        | 0        | 0        | 0        | 0         |
| ENSMUSG Gm9958    | 0.562191 | 0.698117 | 0.757318 | 0.874011 | 0.810745 | 0.46563   |
| ENSMUSG Miga1     | 10.0012  | 9.424795 | 8.812905 | 7.755454 | 8.27995  | 8.83284   |
| ENSMUSG Olfr137   | 0        | 0        | 0        | 0        | 0        | 0         |
| ENSMUSG D630044L  | 0.130654 | 0.137447 | 0.206658 | 0.144062 | 0.103784 | 0.131166  |

|                    |          |          |          |          |          |           |
|--------------------|----------|----------|----------|----------|----------|-----------|
| ENSMUSG Pum3       | 10.29353 | 10.37175 | 11.03804 | 9.242183 | 10.24244 | 9.278608  |
| ENSMUSG Myzap      | 136.6715 | 129.7901 | 128.2356 | 77.92541 | 85.56482 | 70.078294 |
| ENSMUSG Glipr1l3   | 0        | 0        | 0        | 0        | 0        | 0         |
| ENSMUSG Dazap2     | 153.0428 | 140.9021 | 144.1718 | 118.3201 | 117.0533 | 118.81461 |
| ENSMUSG Dbt        | 7.949339 | 8.49042  | 8.279279 | 7.258339 | 7.330912 | 7.094569  |
| ENSMUSG Vmn2r63    | 0        | 0        | 0        | 0        | 0        | 0         |
| Mus_musc Mus_musc  | 0.257508 | 0.146152 | 0.161742 | 0.160637 | 0.186372 | 0.091687  |
| Mus_musc Mus_musc  | 0.201017 | 0.296683 | 0        | 0        | 0.121195 | 0.623791  |
| ENSMUSG Spink6     | 0        | 0        | 0        | 0        | 0        | 0         |
| Mus_musc Mus_musc  | 0.309008 | 0.33467  | 0.32287  | 0.434718 | 0.099995 | 0.130856  |
| Mus_musc Mus_musc  | 0.524729 | 0.73443  | 0.429301 | 1.101456 | 0.196671 | 1.844926  |
| Mus_musc Mus_musc  | 1.81383  | 1.327193 | 1.680933 | 1.313614 | 1.348559 | 1.604538  |
| ENSMUSG Olfr721-ps | 0        | 0        | 0        | 0        | 0        | 0         |
| ENSMUSG Gm20828    | 0        | 0        | 0        | 0        | 0        | 0         |
| ENSMUSG Vmn1r21    | 0.025236 | 0        | 0        | 0        | 0        | 0         |
| ENSMUSG Vmn2r108   | 0        | 0        | 0        | 0        | 0        | 0         |
| ENSMUSG Cox16      | 9.646488 | 12.94341 | 12.98829 | 15.16988 | 12.75078 | 14.080387 |
| ENSMUSG Tmem42     | 12.0168  | 11.56194 | 11.33252 | 11.10175 | 10.51685 | 9.87487   |
| ENSMUSG lpo7       | 26.65457 | 30.49297 | 26.74491 | 25.88336 | 24.79008 | 27.740681 |
| ENSMUSG Pomgnt2    | 5.486884 | 5.031844 | 5.001911 | 4.000674 | 3.534747 | 3.887783  |
| ENSMUSG Khl1       | 0        | 0        | 0        | 0        | 0        | 0         |
| ENSMUSG Rhobtb2    | 4.076028 | 4.092994 | 3.902921 | 4.629363 | 4.298134 | 4.654769  |
| ENSMUSG Tnfrsf10b  | 1.512177 | 1.526686 | 1.661808 | 1.333805 | 1.480913 | 1.143936  |
| ENSMUSG Olfr519    | 0        | 0        | 0        | 0        | 0        | 0         |
| ENSMUSG Sobp       | 0.182783 | 0.183994 | 0.201027 | 0.195366 | 0.473966 | 0.257306  |
| ENSMUSG Fam50b     | 0.06291  | 0        | 0        | 0        | 0        | 0         |
| ENSMUSG Mical2     | 36.77209 | 34.43326 | 31.66093 | 25.64115 | 26.29898 | 27.919323 |
| ENSMUSG Aox4       | 0        | 0        | 0        | 0        | 0.010962 | 0         |
| ENSMUSG Cep250     | 5.436767 | 4.932395 | 5.482296 | 5.418878 | 5.4967   | 5.443287  |
| ENSMUSG Pdss2      | 1.750774 | 1.90279  | 2.075305 | 2.330364 | 1.865502 | 1.726704  |
| ENSMUSG Defb21     | 0        | 0        | 0        | 0        | 0        | 0         |
| ENSMUSG Ptn        | 1.16277  | 1.092952 | 1.146429 | 0.570803 | 0.667757 | 1.313674  |
| ENSMUSG Wnt3a      | 6.297725 | 6.782398 | 6.31171  | 3.213469 | 3.673194 | 3.432895  |
| ENSMUSG Kdm6a      | 7.805477 | 8.389982 | 7.465055 | 8.295894 | 7.756506 | 8.016545  |
| ENSMUSG S1pr1      | 137.4522 | 135.8143 | 150.9153 | 67.91641 | 84.13303 | 70.844109 |
| ENSMUSG Atad1      | 26.19626 | 26.5398  | 24.3714  | 23.03421 | 21.60246 | 22.380135 |
| ENSMUSG Pten       | 24.5045  | 26.17787 | 23.28507 | 20.72825 | 21.47805 | 18.692337 |
| ENSMUSG Stap2      | 15.18974 | 14.23557 | 14.60413 | 12.75219 | 10.79259 | 12.24686  |
| ENSMUSG 4933402N   | 0        | 0        | 0        | 0        | 0        | 0         |
| ENSMUSG Trim24     | 8.367527 | 7.172868 | 5.81574  | 6.298256 | 6.68026  | 6.144463  |
| Mus_musc Mus_musc  | 0.538752 | 0.363447 | 0.457004 | 1.915083 | 1.38691  | 0.838585  |
| ENSMUSG Prdm2      | 16.49208 | 16.4355  | 16.2911  | 15.07817 | 14.37336 | 14.464069 |
| ENSMUSG Srvt       | 26.21983 | 27.1795  | 31.0324  | 28.07965 | 24.66976 | 26.415472 |
| ENSMUSG Pcdhgb4    | 2.190199 | 1.795304 | 1.602038 | 1.174956 | 1.454312 | 1.245641  |
| ENSMUSG Vps4b      | 20.68934 | 20.31733 | 19.93591 | 19.92928 | 19.7935  | 18.770155 |
| ENSMUSG Pax7       | 0        | 0        | 0        | 0        | 0        | 0.008621  |
| ENSMUSG Aldh4a1    | 10.2394  | 11.35578 | 10.35705 | 9.618976 | 8.901946 | 10.493578 |
| ENSMUSG Arhgef37   | 1.642048 | 1.047194 | 2.687542 | 1.290864 | 0.573123 | 0.676887  |
| ENSMUSG Cfap57     | 1.803702 | 2.527668 | 0.899606 | 2.485557 | 2.531656 | 2.883435  |
| ENSMUSG Magi1      | 12.03115 | 13.17224 | 11.02746 | 7.73186  | 8.368938 | 7.75759   |
| ENSMUSG Tas1r2     | 0        | 0        | 0        | 0        | 0.036763 | 0         |
| ENSMUSG Gm3952     | 0        | 0        | 0        | 0        | 0        | 0         |
| ENSMUSG Klf13      | 29.26807 | 30.19584 | 24.59965 | 20.56151 | 21.82579 | 19.66038  |
| Mus_musc Mus_musc  | 0.565681 | 1.539512 | 0.947682 | 0.18246  | 0.729833 | 0.457357  |
| Mus_musc Mus_musc  | 0        | 0        | 0        | 0        | 0        | 0.42945   |
| ENSMUSG Wnk2       | 0.21672  | 0.360707 | 0.1247   | 0.222496 | 0.3045   | 0.346953  |
| ENSMUSG Chd1       | 10.82749 | 11.14099 | 9.971023 | 8.568916 | 9.69866  | 9.185553  |
| ENSMUSG Neurod6    | 0        | 0        | 0        | 0        | 0        | 0         |
| ENSMUSG Ythdc1     | 25.81498 | 25.15322 | 26.08318 | 19.10636 | 19.23138 | 18.320612 |
| ENSMUSG Misp       | 2.426997 | 3.023913 | 2.340541 | 3.100022 | 3.962956 | 3.628965  |
| Mus_musc Mus_musc  | 0.952458 | 0.736476 | 1.455693 | 0.899354 | 0.464114 | 0.428073  |
| ENSMUSG Fmo5       | 10.11516 | 9.886998 | 8.380976 | 6.56622  | 6.796268 | 7.292727  |
| ENSMUSG Chd1l      | 6.580163 | 5.665915 | 5.767025 | 5.847359 | 5.445049 | 5.433464  |
| ENSMUSG Lrba       | 6.661215 | 6.292302 | 5.066213 | 5.909458 | 5.570133 | 6.727545  |

|                   |          |          |          |          |          |           |
|-------------------|----------|----------|----------|----------|----------|-----------|
| ENSMUSG Rps3a1    | 397.0787 | 419.2787 | 425.4396 | 445.8393 | 439.0044 | 438.37668 |
| ENSMUSG Sh3d19    | 16.67592 | 17.89709 | 13.2677  | 13.65353 | 14.31657 | 13.758938 |
| ENSMUSG Gatb      | 2.627413 | 2.332121 | 2.244349 | 3.040763 | 3.123682 | 2.263736  |
| ENSMUSG Fbxw7     | 7.362673 | 7.669912 | 7.020903 | 7.915126 | 8.242484 | 7.959637  |
| ENSMUSG Gm49354   | 0        | 0        | 0        | 0        | 0.02169  | 0.002618  |
| ENSMUSG Nrn1      | 11.46132 | 15.88917 | 10.73586 | 13.55406 | 10.24656 | 14.376978 |
| ENSMUSG Itga9     | 10.4737  | 10.6392  | 8.571213 | 8.452479 | 8.915667 | 9.760352  |
| ENSMUSG Adgrg6    | 21.71166 | 18.05799 | 18.9802  | 13.78265 | 14.07381 | 12.924971 |
| ENSMUSG Taf4      | 9.484017 | 10.05018 | 9.279194 | 8.456239 | 8.375419 | 8.174892  |
| ENSMUSG Mycbpap   | 2.928346 | 2.828979 | 1.803799 | 3.2689   | 2.661869 | 3.038643  |
| ENSMUSG Kctd6     | 5.987488 | 5.232998 | 4.505988 | 3.02373  | 4.711628 | 4.114944  |
| ENSMUSG Acox2     | 2.401533 | 2.718019 | 1.306182 | 3.748183 | 3.1244   | 3.219299  |
| ENSMUSG Fam107a   | 16.0865  | 13.7265  | 14.15339 | 3.755072 | 5.031913 | 4.106002  |
| ENSMUSG Olfr1447  | 0        | 0        | 0        | 0        | 0        | 0         |
| ENSMUSG Il6st     | 53.84404 | 56.75072 | 48.4329  | 53.72609 | 56.04678 | 52.961735 |
| ENSMUSG 2610008E1 | 7.004714 | 6.104775 | 5.995841 | 5.323078 | 4.888551 | 4.887032  |
| ENSMUSG Map3k1    | 6.746092 | 6.373329 | 6.657974 | 8.848078 | 7.984751 | 9.036568  |
| ENSMUSG Plpp1     | 133.9171 | 114.5581 | 113.6398 | 63.76145 | 67.94136 | 61.892904 |
| ENSMUSG Ddx4      | 0.086212 | 0.076847 | 0.015031 | 0.111504 | 0.277559 | 0.087507  |
| ENSMUSG Gm10322   | 0        | 0        | 0        | 0        | 0        | 0         |
| ENSMUSG Zfp65     | 3.101844 | 3.546996 | 2.94208  | 3.199515 | 2.890288 | 2.846097  |
| ENSMUSG 2200002J2 | 0        | 0        | 0        | 0        | 0        | 0         |
| ENSMUSG Etv5      | 44.71123 | 41.36425 | 39.87765 | 37.53626 | 33.52613 | 46.196437 |
| ENSMUSG Phgdh     | 5.255742 | 5.897867 | 5.914595 | 9.139156 | 8.48099  | 7.202139  |
| ENSMUSG Adamts18  | 0        | 0        | 0        | 0        | 0        | 0         |
| ENSMUSG Cacng8    | 0        | 0        | 0        | 0.099805 | 0.087491 | 0         |
| ENSMUSG Zfp952    | 5.02473  | 4.797309 | 4.447285 | 4.185575 | 3.700066 | 4.336715  |
| ENSMUSG Olfr211   | 0        | 0        | 0        | 0        | 0        | 0         |
| ENSMUSG Cd59b     | 1.709177 | 2.707043 | 2.397843 | 2.711251 | 2.980991 | 2.416826  |
| ENSMUSG Elfn1     | 8.194038 | 7.905974 | 7.897634 | 6.033574 | 6.273682 | 6.012296  |
| ENSMUSG Gphb5     | 0        | 0        | 0        | 0        | 0        | 0         |
| ENSMUSG Krt31     | 0        | 0        | 0        | 0        | 0        | 0         |
| ENSMUSG Cntn2     | 0.015719 | 0        | 0.00645  | 0.012535 | 0        | 0.0077    |
| ENSMUSG Sv2b      | 0.050616 | 0.041008 | 0.051623 | 0        | 0        | 0         |
| ENSMUSG Rnft2     | 0.111563 | 0.076197 | 0.096984 | 0.06857  | 0.111779 | 0.223654  |
| ENSMUSG Rspo4     | 0.521428 | 0.615805 | 0.821168 | 0.626561 | 0.417794 | 0.60282   |
| ENSMUSG Cplane1   | 3.79241  | 3.879089 | 3.942574 | 3.646486 | 3.374839 | 2.97565   |
| ENSMUSG Ugt8a     | 0.54197  | 0.770972 | 0.273895 | 0.541805 | 0.386364 | 0.460857  |
| ENSMUSG Pkd1      | 21.95967 | 21.95066 | 21.1879  | 15.61695 | 17.02373 | 16.39039  |
| ENSMUSG Ncoa5     | 14.68064 | 12.91647 | 12.69182 | 11.13507 | 11.76234 | 12.712184 |
| ENSMUSG Gabbr2    | 0        | 0.013445 | 0        | 0        | 0.016819 | 0.036432  |
| ENSMUSG 4632433K: | 0.0283   | 0.007044 | 0.022065 | 0.012858 | 0.004846 | 0.003144  |
| ENSMUSG Gm266     | 0        | 0.054141 | 0        | 0.082067 | 0.090657 | 0         |
| ENSMUSG Hkdc1     | 2.590739 | 2.666409 | 2.613587 | 3.878282 | 4.260933 | 4.675251  |
| ENSMUSG Tmed7     | 38.4781  | 36.37829 | 32.44213 | 34.30661 | 38.41077 | 36.487869 |
| ENSMUSG Gm10135   | 0        | 0        | 0        | 0        | 0        | 0         |
| ENSMUSG Mzt1      | 14.36753 | 15.39762 | 15.81416 | 13.79319 | 13.25974 | 12.309971 |
| ENSMUSG P2ry12    | 2.336187 | 1.56078  | 2.628983 | 2.120525 | 1.81776  | 1.999546  |
| ENSMUSG Aifm2     | 8.377417 | 7.789178 | 7.19331  | 8.839228 | 9.35842  | 8.436914  |
| ENSMUSG Slc22a21  | 1.039507 | 0.605667 | 0.778671 | 0.393204 | 0.497639 | 0.582037  |
| ENSMUSG Kbtbd12   | 0.033768 | 0.032364 | 0.010913 | 0.075467 | 0.109949 | 0.120215  |
| ENSMUSG Sar1a     | 69.14286 | 70.45879 | 68.15844 | 64.22164 | 66.80118 | 65.857978 |
| ENSMUSG Umps      | 4.365942 | 4.48923  | 4.868883 | 5.45069  | 4.740292 | 5.814307  |
| ENSMUSG Itgb5     | 46.16233 | 38.96975 | 47.86568 | 37.4307  | 38.69456 | 39.959543 |
| ENSMUSG Fstl1     | 23.12097 | 22.09866 | 23.9742  | 28.4524  | 26.58609 | 29.779963 |
| ENSMUSG Zfp148    | 8.348009 | 9.01607  | 7.67122  | 7.366223 | 8.569007 | 8.599281  |
| ENSMUSG Zbtb18    | 16.11714 | 15.31413 | 14.05883 | 15.88652 | 13.86585 | 15.864461 |
| ENSMUSG Gsk3b     | 16.05056 | 16.5218  | 13.9073  | 12.35368 | 13.19395 | 13.341396 |
| ENSMUSG Taf1a     | 9.642915 | 9.276619 | 7.812142 | 6.36052  | 6.194903 | 5.25373   |
| ENSMUSG Gm5592    | 0        | 0        | 0        | 0        | 0        | 0         |
| ENSMUSG Knop1     | 8.612722 | 8.959361 | 7.732749 | 9.609789 | 9.810903 | 10.707125 |
| ENSMUSG Mmp21     | 0        | 0        | 0        | 0        | 0        | 0         |
| ENSMUSG Vps35l    | 10.92543 | 9.872855 | 9.693202 | 10.92426 | 11.24279 | 11.521615 |
| ENSMUSG Bccip     | 26.50909 | 26.1773  | 27.54444 | 26.48439 | 25.19185 | 23.663694 |

|                   |          |          |          |          |          |           |
|-------------------|----------|----------|----------|----------|----------|-----------|
| ENSMUSG Adam12    | 0.384417 | 0.410875 | 0.210398 | 0.434814 | 0.290413 | 0.430576  |
| ENSMUSG Dhx32     | 12.68397 | 11.66149 | 10.24825 | 10.94643 | 11.21805 | 11.799267 |
| ENSMUSG Stim1     | 18.81855 | 19.46321 | 17.12165 | 16.49151 | 18.0689  | 18.060197 |
| ENSMUSG Dusp2     | 1.234705 | 0.79235  | 3.213287 | 1.986066 | 1.754007 | 1.88304   |
| ENSMUSG Trmt10a   | 1.604249 | 1.412996 | 1.705487 | 1.631978 | 1.602935 | 1.551533  |
| ENSMUSG Omd       | 2.05836  | 2.222343 | 2.213351 | 1.178554 | 1.174404 | 1.168144  |
| ENSMUSG Hdc       | 12.73426 | 13.79652 | 13.73101 | 25.50382 | 22.04023 | 28.938955 |
| ENSMUSG Gabpb1    | 10.44227 | 9.492683 | 8.375747 | 9.155665 | 8.380796 | 8.117237  |
| ENSMUSG Usp8      | 29.11913 | 29.96504 | 27.43758 | 30.06067 | 30.46721 | 33.041801 |
| ENSMUSG Usp50     | 0.273701 | 0.355708 | 0.496793 | 0.45339  | 0.487615 | 0.379581  |
| ENSMUSG Trpm7     | 15.41687 | 15.595   | 13.06454 | 14.30182 | 13.94951 | 13.798947 |
| ENSMUSG Sppl2a    | 24.49437 | 24.90649 | 27.58581 | 25.84537 | 24.0763  | 23.666209 |
| ENSMUSG Stard7    | 18.12263 | 18.07236 | 18.35672 | 17.43684 | 16.87206 | 16.786467 |
| ENSMUSG Vav3      | 6.450616 | 4.91636  | 7.066838 | 4.237056 | 4.785152 | 4.105949  |
| ENSMUSG Sfxn5     | 2.978438 | 2.547939 | 2.524981 | 1.896435 | 2.283721 | 1.902771  |
| ENSMUSG BC034090  | 2.017661 | 1.805382 | 1.802245 | 1.060783 | 1.093068 | 1.334533  |
| ENSMUSG Emx1      | 0        | 0        | 0        | 0        | 0        | 0         |
| ENSMUSG Lrrc14    | 5.151121 | 4.538665 | 4.578225 | 4.357044 | 4.350082 | 4.27865   |
| ENSMUSG Dnajb8    | 0        | 0        | 0.057258 | 0        | 0        | 0         |
| ENSMUSG Icam1     | 172.0481 | 150.9506 | 195.8678 | 128.6503 | 139.8271 | 137.28946 |
| ENSMUSG Htra4     | 0.880039 | 0.743894 | 0.774084 | 0.354737 | 0.617541 | 0.598098  |
| ENSMUSG Atp11b    | 15.5287  | 16.65951 | 15.32909 | 15.48754 | 16.77436 | 15.25839  |
| ENSMUSG Cnnm4     | 2.180412 | 2.400872 | 2.171352 | 2.629798 | 2.600308 | 2.762065  |
| ENSMUSG Gm10320   | 0        | 0.393825 | 0.266066 | 0.302134 | 0.454509 | 0.510968  |
| ENSMUSG Hdac9     | 0.571922 | 0.740486 | 0.780632 | 2.663256 | 2.178385 | 2.719867  |
| ENSMUSG Adarb1    | 16.36365 | 16.80012 | 17.07797 | 12.227   | 12.51322 | 12.170128 |
| ENSMUSG Hax1      | 27.36827 | 26.49423 | 28.57855 | 28.99935 | 27.18359 | 28.279263 |
| ENSMUSG Appl2     | 18.91992 | 20.2275  | 18.3157  | 20.85563 | 20.77193 | 20.488565 |
| ENSMUSG Tpm3      | 89.18833 | 87.45826 | 97.08462 | 82.2022  | 74.94793 | 88.378121 |
| ENSMUSG 4933434E2 | 23.756   | 24.00532 | 23.18135 | 27.12861 | 27.73542 | 23.752521 |
| ENSMUSG Mt2       | 11.50548 | 13.68273 | 7.351063 | 23.97615 | 33.94568 | 24.371127 |
| ENSMUSG Mt3       | 0        | 0.307584 | 0.04675  | 0.741841 | 0.389641 | 0.332243  |
| ENSMUSG Nudt7     | 2.301075 | 2.134168 | 1.619239 | 2.201838 | 2.515673 | 2.191072  |
| ENSMUSG Slc12a3   | 0.062131 | 0.09818  | 0.011759 | 0.074944 | 0        | 0.031489  |
| ENSMUSG Mt1       | 36.12895 | 43.83286 | 27.49973 | 60.6056  | 74.69752 | 64.323303 |
| ENSMUSG Wdr12     | 1.056449 | 1.563318 | 1.350891 | 2.036546 | 1.757443 | 1.784907  |
| ENSMUSG Ica1l     | 0.24815  | 0.281809 | 0.116959 | 0.115232 | 0.093704 | 0.191301  |
| ENSMUSG Nus1      | 17.18495 | 16.93526 | 17.07009 | 16.83496 | 18.16044 | 16.492149 |
| ENSMUSG Fthl17c   | 0        | 0        | 0        | 0        | 0        | 0         |
| ENSMUSG Ctla4     | 0.30836  | 0.294648 | 0.277657 | 1.31957  | 1.442447 | 1.130463  |
| ENSMUSG Olfr292   | 0        | 0        | 0        | 0        | 0        | 0         |
| ENSMUSG Cd28      | 1.249996 | 1.238698 | 1.406713 | 2.419333 | 1.83948  | 2.106257  |
| ENSMUSG Cdkn1a    | 24.54493 | 37.39542 | 55.22411 | 39.35081 | 39.23479 | 40.518376 |
| ENSMUSG Raph1     | 10.93226 | 11.75949 | 10.36981 | 7.791664 | 8.647906 | 7.433051  |
| ENSMUSG Carf      | 1.868685 | 2.005269 | 1.597967 | 1.462599 | 1.63869  | 1.937299  |
| ENSMUSG Sncg      | 2.834044 | 3.067621 | 3.277798 | 2.899248 | 1.642323 | 2.393773  |
| ENSMUSG Cops9     | 33.2654  | 39.25829 | 33.22694 | 44.75709 | 41.14264 | 41.396766 |
| ENSMUSG Gm10549   | 0.1358   | 0        | 0        | 0        | 0.257221 | 0         |
| ENSMUSG Sardh     | 3.276347 | 3.6263   | 3.018972 | 2.93849  | 2.764843 | 3.642979  |
| ENSMUSG Cfap46    | 1.263523 | 1.443979 | 0.755197 | 1.663368 | 1.263868 | 1.49895   |
| ENSMUSG Olfr780   | 0        | 0        | 0        | 0        | 0        | 0         |
| ENSMUSG Zfpm1     | 8.539837 | 6.928425 | 8.395492 | 5.887777 | 5.696319 | 6.253286  |
| Mus_musc Mus_musc | 0.189794 | 0.151747 | 0.211145 | 0.537411 | 0.332983 | 0.247644  |
| Mus_musc Mus_musc | 0.262604 | 0.122072 | 0.169307 | 0.210161 | 0.189654 | 0.12335   |
| Mus_musc Mus_musc | 0.088712 | 0.242401 | 0.331106 | 0.125381 | 0.034227 | 0.120902  |
| Mus_musc Mus_musc | 0.296824 | 0        | 0        | 0        | 0        | 0         |
| Mus_musc Mus_musc | 0.400551 | 0.24651  | 0.250763 | 0.290566 | 0.364701 | 0.313688  |
| Mus_musc Mus_musc | 0.037543 | 0.191489 | 0.121522 | 1.061175 | 0.555023 | 0.602942  |
| Mus_musc Mus_musc | 0.188031 | 0        | 0        | 0        | 0        | 0         |
| ENSMUSG Krtap5-3  | 0        | 0        | 0        | 0        | 0        | 0         |
| ENSMUSG Nme9      | 6.70821  | 8.495848 | 4.109767 | 8.526718 | 8.396862 | 7.825991  |
| ENSMUSG Hepacam   | 0.640861 | 0.799004 | 0.528916 | 0.627072 | 0.809772 | 0.728711  |
| ENSMUSG Olfr1351  | 0        | 0        | 0        | 0        | 0        | 0         |
| ENSMUSG Pilra     | 5.003295 | 4.982803 | 5.303225 | 2.055753 | 1.485885 | 1.308305  |

|                   |          |          |          |          |          |           |
|-------------------|----------|----------|----------|----------|----------|-----------|
| ENSMUSG Vpr2      | 2.236777 | 2.267279 | 3.148739 | 2.82344  | 2.697389 | 2.795886  |
| ENSMUSG Kmo       | 0.672458 | 0.952901 | 0.601358 | 2.00469  | 2.133325 | 1.924981  |
| ENSMUSG Hspa1b    | 15.59042 | 69.68787 | 76.85132 | 13.35759 | 20.68548 | 69.250114 |
| ENSMUSG Tmem268   | 4.729706 | 5.575396 | 5.824249 | 8.401344 | 9.040925 | 9.699505  |
| ENSMUSG Ccdc42    | 2.519142 | 1.493753 | 2.81929  | 0.586064 | 0.618344 | 0.887648  |
| ENSMUSG Galnt16   | 0        | 0        | 0        | 0        | 0        | 0.033984  |
| ENSMUSG C2cd4c    | 0        | 0.013713 | 0        | 0.030257 | 0.00604  | 0.017764  |
| ENSMUSG Fam187a   | 0        | 0.030005 | 0        | 0        | 0        | 0         |
| ENSMUSG Tbc1d10b  | 15.89732 | 14.9525  | 15.57847 | 16.0912  | 16.55515 | 15.62487  |
| ENSMUSG Prdm10    | 2.274646 | 2.805331 | 2.43161  | 2.767566 | 2.57572  | 2.461414  |
| ENSMUSG Dsc3      | 0.010578 | 0.019965 | 0.016916 | 0        | 0        | 0.009567  |
| ENSMUSG Zfp930    | 4.484193 | 5.078931 | 4.76126  | 4.724549 | 4.467192 | 4.006894  |
| ENSMUSG Gm3239    | 0        | 0        | 0        | 0        | 0        | 0         |
| ENSMUSG Ptp4a3    | 72.94427 | 73.27655 | 79.57217 | 46.35983 | 40.88661 | 46.38475  |
| ENSMUSG D330045A  | 0.128256 | 0.205636 | 0.133042 | 0.244936 | 0.20128  | 0.2146    |
| ENSMUSG Tsk5      | 0        | 0.032486 | 0        | 0.031159 | 0.0858   | 0         |
| ENSMUSG Ube4a     | 15.60094 | 16.88329 | 14.45478 | 15.25587 | 15.16266 | 15.23404  |
| ENSMUSG Art3      | 16.97002 | 23.50302 | 20.43663 | 10.39733 | 8.526813 | 7.833478  |
| ENSMUSG Cldn12    | 10.30076 | 11.3351  | 9.454183 | 6.732206 | 6.705019 | 6.11068   |
| ENSMUSG Fam90a1b  | 0        | 0        | 0        | 0        | 0        | 0         |
| ENSMUSG Ppp1r3b   | 2.210607 | 2.528605 | 2.459536 | 3.745231 | 3.46705  | 2.966448  |
| ENSMUSG Ttc21b    | 4.029005 | 4.761364 | 3.972002 | 3.822761 | 3.666813 | 4.145408  |
| ENSMUSG Olfr1341  | 0        | 0        | 0        | 0        | 0        | 0         |
| ENSMUSG Riox1     | 8.581741 | 7.645747 | 8.120034 | 5.374753 | 5.308865 | 6.212357  |
| ENSMUSG Zfp787    | 10.54064 | 12.67353 | 11.21752 | 11.50162 | 11.90937 | 12.225781 |
| ENSMUSG Casc1     | 0.852905 | 1.234322 | 0.687888 | 1.273331 | 1.294878 | 0.891296  |
| Mus_musc Mus_musc | 0        | 0        | 0        | 0        | 0        | 0         |
| Mus_musc Mus_musc | 0        | 0        | 0        | 0.658088 | 0.651667 | 0.438278  |
| Mus_musc Mus_musc | 0.456703 | 0.432953 | 0.146182 | 0.29621  | 0.099149 | 0.185102  |
| Mus_musc Mus_musc | 0        | 0.154309 | 0        | 0        | 0        | 0         |
| ENSMUSG Slc25a18  | 0.558683 | 0.595354 | 0.359973 | 0.679229 | 0.501461 | 0.766142  |
| ENSMUSG Dusp8     | 8.272453 | 7.792426 | 12.04876 | 3.364735 | 3.460493 | 4.57732   |
| ENSMUSG Gm3424    | 0        | 0        | 0        | 0        | 0        | 0         |
| ENSMUSG Gm11627   | 2.5929   | 2.173122 | 2.520632 | 1.717344 | 1.639543 | 1.655055  |
| ENSMUSG Zfp691    | 2.394733 | 2.840575 | 3.153064 | 2.819392 | 3.178354 | 3.003618  |
| ENSMUSG Tas2r119  | 0        | 0        | 0        | 0        | 0        | 0         |
| ENSMUSG Slc25a36  | 25.93661 | 26.90795 | 21.04555 | 20.68313 | 19.63097 | 19.771716 |
| ENSMUSG Gm38655   | 4.694975 | 5.135978 | 3.213143 | 3.765933 | 3.484511 | 4.761398  |
| ENSMUSG Tgfbr2    | 43.444   | 43.75118 | 42.72989 | 39.37295 | 40.99156 | 42.031358 |
| ENSMUSG Eomes     | 0.831355 | 0.560823 | 2.097547 | 1.332026 | 0.892023 | 1.435441  |
| ENSMUSG Cyb5d1    | 9.541908 | 12.05501 | 12.45525 | 12.12236 | 14.33434 | 15.02336  |
| ENSMUSG Isca1     | 33.97795 | 34.96559 | 33.54516 | 26.6849  | 30.67018 | 27.675634 |
| ENSMUSG Setd2     | 19.6351  | 19.23414 | 18.38538 | 16.52124 | 16.38173 | 14.982518 |
| ENSMUSG Hspb7     | 2.008996 | 5.426069 | 1.968115 | 3.422066 | 3.112078 | 2.272832  |
| ENSMUSG Olfr923   | 0        | 0        | 0        | 0        | 0        | 0         |
| ENSMUSG Cacul1    | 8.803176 | 9.419409 | 8.763185 | 7.662301 | 8.664342 | 8.214836  |
| ENSMUSG Gm14743   | 0        | 0        | 0        | 0        | 0        | 0         |
| ENSMUSG Reg3a     | 0        | 0        | 0        | 0        | 0        | 0         |
| ENSMUSG Gm42688   | 3.002845 | 3.222525 | 3.006177 | 2.780825 | 2.871055 | 2.591732  |
| ENSMUSG 4932429Pc | 0        | 0        | 0        | 0        | 0        | 0         |
| ENSMUSG Pcdh8     | 0        | 0        | 0        | 0        | 0        | 0         |
| ENSMUSG Gm29609   | 0.091585 | 0.030003 | 0.179208 | 0.104325 | 0.03685  | 0.056874  |
| ENSMUSG Gpi1      | 66.26564 | 67.53776 | 70.33634 | 72.29071 | 73.50663 | 77.351165 |
| ENSMUSG Pheta1    | 7.974981 | 6.214117 | 5.693479 | 6.43424  | 7.138089 | 5.83633   |
| ENSMUSG Prss53    | 1.095685 | 0.601141 | 0.804414 | 0.798585 | 0.718752 | 0.498853  |
| ENSMUSG Nop53     | 41.62421 | 44.60503 | 45.54114 | 42.15251 | 37.4827  | 40.001141 |
| ENSMUSG Tssk1     | 0.037251 | 0.031779 | 0.013698 | 0.034427 | 0.015137 | 0.054708  |
| ENSMUSG Serpina12 | 0        | 0        | 0        | 0        | 0        | 0         |
| ENSMUSG L3mbtl4   | 0        | 0.048786 | 0.117045 | 0.167479 | 0.087764 | 0.047626  |
| ENSMUSG Zfy2      | 0        | 0.012199 | 0        | 0        | 0        | 0         |
| ENSMUSG Gm16286   | 37.31285 | 35.2139  | 41.22043 | 35.44766 | 34.41469 | 36.212162 |
| ENSMUSG Rps27rt   | 77.40008 | 80.73345 | 67.02474 | 67.78719 | 152.4827 | 97.843567 |
| ENSMUSG Gpd1l     | 17.10803 | 18.08913 | 15.82526 | 15.52994 | 15.53131 | 15.70826  |
| ENSMUSG Pde6a     | 0.110071 | 0.101395 | 0.011464 | 0.045197 | 0.009501 | 0.015748  |

|                   |          |          |          |          |          |           |
|-------------------|----------|----------|----------|----------|----------|-----------|
| ENSMUSG Csnk1a1   | 86.35437 | 79.59671 | 78.74006 | 72.20846 | 72.37643 | 69.984346 |
| ENSMUSG Il17b     | 0.081245 | 0        | 0        | 0        | 0        | 0         |
| ENSMUSG Pcyox1l   | 3.267034 | 3.886992 | 4.465166 | 4.896372 | 5.203858 | 5.424437  |
| ENSMUSG Ubald2    | 33.05864 | 30.75079 | 30.90494 | 30.19856 | 31.07806 | 29.363205 |
| Mus_musc Mus_musc | 0.238319 | 0        | 0        | 0.101172 | 0        | 0         |
| Mus_musc Mus_musc | 0        | 0.14981  | 0.128079 | 0        | 0        | 0         |
| Mus_musc Mus_musc | 0        | 0.265412 | 0.34081  | 0.122871 | 0        | 0.102183  |
| Mus_musc Mus_musc | 0        | 0.063224 | 0.312845 | 0.208255 | 0.296893 | 0         |
| Mus_musc Mus_musc | 0        | 0        | 0        | 0.348032 | 0        | 0         |
| ENSMUSG Akap17b   | 1.03848  | 1.068649 | 1.085857 | 1.36691  | 1.259388 | 1.487604  |
| ENSMUSG Ces2b     | 0.800237 | 0.534604 | 0.597275 | 0.565297 | 0.446079 | 0.502026  |
| ENSMUSG Dusp19    | 3.705325 | 3.592985 | 3.682332 | 3.668094 | 3.420291 | 3.862889  |
| ENSMUSG Nckap1    | 49.46217 | 49.28145 | 42.9383  | 34.46388 | 36.99417 | 34.26766  |
| ENSMUSG Frzb      | 0.192092 | 0.163326 | 0.054881 | 0.143899 | 0.11549  | 0.183192  |
| ENSMUSG Itprid2   | 20.56186 | 21.31702 | 19.02768 | 19.15339 | 19.64538 | 20.270681 |
| ENSMUSG Dnajc10   | 35.2253  | 37.88789 | 34.64938 | 33.0431  | 34.69188 | 33.565685 |
| ENSMUSG Itga4     | 6.448059 | 5.388455 | 7.411979 | 14.42352 | 12.92461 | 13.579361 |
| ENSMUSG Tmem208   | 23.85649 | 20.25373 | 25.27317 | 22.76637 | 26.54156 | 23.852853 |
| ENSMUSG Msh3      | 2.823167 | 2.969048 | 2.851828 | 2.900267 | 2.914973 | 2.720249  |
| ENSMUSG Adamts13  | 0.081089 | 0.370673 | 0.054471 | 0.064617 | 0.019556 | 0.13366   |
| ENSMUSG Txnrd3    | 8.881932 | 7.879729 | 7.009401 | 6.441881 | 6.071178 | 6.842223  |
| ENSMUSG Gm11487   | 0        | 0        | 0        | 0        | 0        | 0         |
| ENSMUSG Fasl      | 0.907929 | 0.400357 | 2.14044  | 0.794527 | 0.308809 | 0.393761  |
| Mus_musc Mus_musc | 0        | 0        | 0        | 0        | 0        | 0         |
| Mus_musc Mus_musc | 0.054933 | 0.528322 | 0.295243 | 0.313111 | 0.269255 | 1.243771  |
| Mus_musc Mus_musc | 0.146777 | 0.489299 | 0        | 0        | 0.475094 | 0.330185  |
| Mus_musc Mus_musc | 0        | 0        | 0        | 0        | 0        | 0.065622  |
| Mus_musc Mus_musc | 0        | 0        | 0        | 0.348032 | 0        | 0         |
| ENSMUSG Pcmt1     | 21.71742 | 22.55601 | 20.6324  | 20.40289 | 18.33715 | 17.736241 |
| Mus_musc Mus_musc | 0.349267 | 0.42939  | 0.575774 | 0.463767 | 0.609965 | 0.529371  |
| Mus_musc Mus_musc | 0.271419 | 0.008051 | 0.052884 | 0.421422 | 0.025975 | 0.234637  |
| Mus_musc Mus_musc | 0.917575 | 1.336931 | 1.347816 | 1.155597 | 0.938492 | 1.112404  |
| Mus_musc Mus_musc | 0.202184 | 0.446335 | 0.408111 | 0.321213 | 0.31584  | 0.475319  |
| Mus_musc Mus_musc | 0.711704 | 0.474199 | 0.685414 | 2.822481 | 1.747623 | 2.288633  |
| Mus_musc Mus_musc | 0.395856 | 0        | 0        | 0.071744 | 0        | 0         |
| Mus_musc Mus_musc | 0.376465 | 0        | 0.101651 | 0        | 0        | 0         |
| Mus_musc Mus_musc | 0.2404   | 0.108739 | 0.098157 | 0        | 0.033842 | 0.093752  |
| ENSMUSG Gm13083   | 0        | 0        | 0        | 0        | 0        | 0         |
| ENSMUSG Pilrb2    | 1.859206 | 1.975387 | 1.705956 | 1.179335 | 0.476825 | 1.379459  |
| ENSMUSG Pilrb1    | 2.846184 | 1.704269 | 3.410896 | 2.007289 | 1.15671  | 0.928246  |
| ENSMUSG Zbtb16    | 50.21093 | 42.34806 | 42.84384 | 10.82285 | 19.24268 | 8.175345  |
| ENSMUSG Apol9a    | 0.700836 | 0.620159 | 1.967472 | 0.914215 | 1.020406 | 0.506091  |
| ENSMUSG Gnrh1     | 0.692096 | 0.653404 | 1.530443 | 0.705675 | 0.435648 | 0.332969  |
| ENSMUSG Rps5      | 403.4508 | 437.8879 | 441.6393 | 447.0769 | 424.299  | 470.18002 |
| ENSMUSG Gm10670   | 0        | 0        | 0        | 0        | 0        | 0         |
| ENSMUSG Ugt2b36   | 0        | 0        | 0        | 0        | 0        | 0         |
| ENSMUSG Hist1h4d  | 0.046099 | 0.033086 | 0.214213 | 0.300325 | 0.045771 | 0.329852  |
| ENSMUSG Olfr346   | 0        | 0        | 0        | 0        | 0        | 0         |
| ENSMUSG Olfr525   | 0        | 0        | 0        | 0.049056 | 0        | 0         |
| Mus_musc Mus_musc | 0.083156 | 0.14658  | 0.215549 | 0.331537 | 0.234507 | 0         |
| Mus_musc Mus_musc | 0        | 0        | 0.079437 | 0.487682 | 0.201909 | 0.355093  |
| Mus_musc Mus_musc | 4.126032 | 4.14479  | 4.820662 | 6.808879 | 10.85162 | 7.166183  |
| Mus_musc Mus_musc | 1.025624 | 0.538554 | 0.45518  | 0.203059 | 0.081542 | 0.264114  |
| Mus_musc Mus_musc | 0.112594 | 0.130131 | 0        | 0.094302 | 0.332394 | 0.111762  |
| Mus_musc Mus_musc | 0        | 0        | 0.211859 | 0        | 0.094869 | 0         |
| Mus_musc Mus_musc | 0        | 0        | 0        | 0        | 0.31315  | 0         |
| Mus_musc Mus_musc | 0        | 0        | 0        | 0.174016 | 0        | 0.107922  |
| Mus_musc Mus_musc | 0.224449 | 0.083843 | 0.163802 | 0.31136  | 0.411767 | 0.356894  |
| ENSMUSG Hmgcs1    | 38.5808  | 32.51387 | 36.94631 | 42.08334 | 33.62659 | 43.59166  |
| ENSMUSG Amy2a3    | 0        | 0        | 0        | 0        | 0        | 0         |
| ENSMUSG Olfr971   | 0        | 0        | 0        | 0        | 0        | 0         |
| ENSMUSG Atxn10    | 61.35431 | 57.16856 | 52.60334 | 43.88365 | 42.39126 | 49.541824 |
| ENSMUSG Pcdhga5   | 1.524741 | 1.45588  | 1.575858 | 0.869265 | 0.882252 | 1.060317  |
| ENSMUSG Tll1      | 0.994788 | 0.907696 | 0.707214 | 0.742608 | 0.922888 | 0.673495  |



|                   |          |          |          |          |          |           |
|-------------------|----------|----------|----------|----------|----------|-----------|
| ENSMUSG Gyl1      | 0        | 0        | 0        | 0        | 0        | 0         |
| ENSMUSG Gm3248    | 0.131851 | 0.313274 | 0.128038 | 0.074941 | 0.101477 | 0.10854   |
| ENSMUSG Gm42715   | 1.580327 | 5.957819 | 6.036551 | 4.978008 | 3.080799 | 5.62356   |
| ENSMUSG Gm20817   | 0        | 0        | 0        | 0        | 0        | 0         |
| ENSMUSG Rpp25l    | 12.46192 | 12.66904 | 13.17643 | 11.28421 | 14.65295 | 12.596533 |
| ENSMUSG Il5       | 0.036862 | 0        | 0.051879 | 0.339699 | 0.271354 | 0.258005  |
| ENSMUSG Lmo1      | 0.503067 | 0.856344 | 0.31379  | 0.470332 | 0.553817 | 1.030109  |
| ENSMUSG Slc17a2   | 0.402228 | 0.300129 | 0.247985 | 0.296267 | 0.165478 | 0.142089  |
| ENSMUSG Metap2    | 26.61913 | 43.56759 | 46.39343 | 29.38387 | 27.98427 | 33.366986 |
| ENSMUSG Zfp986    | 0        | 0        | 0.047246 | 0        | 0        | 0.090222  |
| ENSMUSG Usp5      | 18.7022  | 19.27363 | 19.46803 | 20.60548 | 19.28748 | 21.265419 |
| ENSMUSG Poli      | 2.012009 | 1.51895  | 2.023555 | 2.668149 | 2.568861 | 2.016042  |
| ENSMUSG Hdhd3     | 9.243032 | 7.229998 | 6.940403 | 7.107512 | 7.8166   | 6.873281  |
| ENSMUSG Fcrla     | 4.938675 | 2.247375 | 1.937395 | 12.57834 | 10.93834 | 12.216919 |
| ENSMUSG Mos       | 0.022709 | 0        | 0        | 0        | 0        | 0.059234  |
| ENSMUSG Sox6      | 1.217497 | 1.110456 | 0.809849 | 0.57372  | 0.508899 | 0.65604   |
| ENSMUSG Tas2r144  | 0        | 0        | 0        | 0        | 0        | 0         |
| ENSMUSG Prdm15    | 2.243906 | 2.331066 | 2.719519 | 2.391271 | 2.439662 | 2.467899  |
| Mus_musc Mus_musc | 0        | 0.025588 | 0        | 0.076571 | 0        | 0.190731  |
| ENSMUSG Dazl      | 0.03791  | 0        | 0        | 0        | 0.016499 | 0         |
| ENSMUSG Pax5      | 1.950086 | 1.000176 | 1.204718 | 2.718379 | 2.083155 | 2.929735  |
| ENSMUSG Gm42417   | 0.187901 | 0.346294 | 0.306411 | 0.261223 | 0.115607 | 0.098497  |
| ENSMUSG Nup62     | 11.98033 | 10.55469 | 10.9306  | 12.4954  | 13.58976 | 14.385652 |
| ENSMUSG Olfr623   | 0        | 0        | 0        | 0        | 0        | 0         |
| ENSMUSG Gm6882    | 0        | 0        | 0        | 0        | 0        | 0         |
| ENSMUSG Zfp383    | 3.864601 | 4.788852 | 4.134798 | 3.197717 | 2.806931 | 3.237996  |
| ENSMUSG Col9a1    | 0        | 0        | 0        | 0        | 0        | 0         |
| ENSMUSG Eed       | 12.49424 | 13.81994 | 12.47468 | 12.1761  | 13.90835 | 12.918717 |
| ENSMUSG H2-DMa    | 21.77138 | 19.2788  | 44.43293 | 44.82892 | 30.50458 | 35.754696 |
| ENSMUSG Folh1     | 0.123589 | 0.18522  | 0.064007 | 0.099788 | 0.066552 | 0.03171   |
| ENSMUSG Prkci     | 41.40475 | 42.60324 | 37.00055 | 25.34758 | 26.70284 | 25.840713 |
| ENSMUSG Zfp60     | 3.164469 | 3.552313 | 3.145339 | 2.782679 | 2.790743 | 2.962176  |
| ENSMUSG Ccdc90b   | 10.83368 | 11.30684 | 8.627387 | 8.708016 | 7.700717 | 9.143769  |
| ENSMUSG Vps13b    | 6.491205 | 6.912965 | 5.284549 | 6.536185 | 6.53721  | 6.908938  |
| ENSMUSG Tmem126   | 9.852744 | 10.23205 | 10.39038 | 12.18054 | 14.2574  | 13.85161  |
| ENSMUSG Sytl2     | 8.212652 | 7.736837 | 8.071352 | 9.471938 | 7.971543 | 8.663966  |
| ENSMUSG Chordc1   | 10.12985 | 14.24926 | 11.28717 | 9.436078 | 8.991798 | 10.243592 |
| Mus_musc Mus_musc | 0.182406 | 0.190944 | 0        | 0.119729 | 0.5601   | 0.053504  |
| ENSMUSG Gm9918    | 0.023675 | 0.039422 | 0        | 0.023858 | 0        | 0.060667  |
| ENSMUSG Galnt12   | 1.054061 | 1.233665 | 1.160255 | 2.251638 | 1.659914 | 3.385109  |
| ENSMUSG Defb3     | 0        | 0        | 0        | 0        | 0        | 0         |
| ENSMUSG Zfp993    | 0.685635 | 0.391403 | 0.226836 | 1.230623 | 1.360479 | 1.184397  |
| ENSMUSG Ypel5     | 16.29074 | 15.03445 | 15.9469  | 14.23583 | 16.44113 | 15.15094  |
| ENSMUSG Polr2j    | 24.78017 | 23.13076 | 26.30853 | 21.99383 | 21.26824 | 22.645493 |
| ENSMUSG Olfr133   | 0        | 0        | 0        | 0        | 0        | 0         |
| ENSMUSG Rwd4a     | 7.832304 | 8.247259 | 8.506709 | 7.351777 | 7.715154 | 7.58794   |
| ENSMUSG Prss47    | 0        | 0        | 0.036046 | 0        | 0        | 0         |
| ENSMUSG Zfp493    | 0.875922 | 0.810337 | 0.768976 | 0.809485 | 0.944808 | 0.792713  |
| ENSMUSG Vmn1r200  | 0        | 0        | 0        | 0        | 0        | 0         |
| ENSMUSG Arntl     | 2.017699 | 2.406624 | 2.578389 | 5.290459 | 5.116667 | 6.439927  |
| ENSMUSG Wwc2      | 27.87129 | 26.90318 | 24.61305 | 17.27181 | 17.70438 | 17.030821 |
| ENSMUSG Dctd      | 0.133257 | 0.259587 | 0.34217  | 0.468499 | 0.529166 | 0.49957   |
| ENSMUSG Fgfr1     | 12.1264  | 12.77517 | 12.01572 | 11.29232 | 13.64602 | 12.841261 |
| Mus_musc Mus_musc | 0        | 0        | 0        | 0.155702 | 0.246916 | 0         |
| ENSMUSG Olfr1166  | 0        | 0        | 0        | 0        | 0        | 0         |
| ENSMUSG Rcor3     | 8.538198 | 8.429445 | 7.972622 | 6.940319 | 7.667718 | 7.446422  |
| ENSMUSG 9530002B  | 0        | 0        | 0        | 0        | 0        | 0         |
| ENSMUSG Acy1      | 3.921761 | 4.938279 | 4.442328 | 3.865004 | 5.194821 | 3.678619  |
| ENSMUSG Muc3      | 0        | 0.10576  | 0        | 0.190638 | 0        | 0         |
| ENSMUSG Gabrr2    | 0.228206 | 0.504664 | 0.135201 | 0.051211 | 0.230154 | 0         |
| ENSMUSG Frs3      | 2.173282 | 2.067271 | 1.715294 | 1.443316 | 1.288735 | 1.220965  |
| ENSMUSG Olfr1082  | 0        | 0        | 0        | 0        | 0        | 0         |
| ENSMUSG D130052B  | 0        | 0        | 0.019286 | 0        | 0        | 0.021428  |
| ENSMUSG Tspyl4    | 7.545737 | 7.102284 | 6.372538 | 7.730148 | 7.37495  | 8.655331  |

|                   |          |          |          |          |          |           |
|-------------------|----------|----------|----------|----------|----------|-----------|
| ENSMUSG Asb6      | 6.309374 | 6.018533 | 6.330418 | 5.504753 | 4.810868 | 5.91234   |
| ENSMUSG Nt5dc1    | 7.059853 | 8.151496 | 6.409007 | 6.668653 | 6.220873 | 6.262656  |
| ENSMUSG Nrtn      | 1.748711 | 0.2964   | 1.046314 | 0.631595 | 1.166508 | 1.933685  |
| ENSMUSG Cntn5     | 0        | 0        | 0        | 0        | 0        | 0         |
| Mus_musc Mus_musc | 1.772623 | 0.917634 | 0.747586 | 0.373524 | 0.497478 | 0.389542  |
| ENSMUSG Gtf3c2    | 17.77202 | 17.0409  | 15.89447 | 15.19716 | 14.22628 | 15.435134 |
| ENSMUSG Akr1cl    | 0        | 0        | 0        | 0        | 0        | 0         |
| ENSMUSG Mettl21a  | 4.386426 | 3.60228  | 4.330348 | 4.053981 | 3.477818 | 4.41514   |
| ENSMUSG Idh1      | 36.38351 | 35.97792 | 32.43404 | 50.57157 | 51.37509 | 53.824543 |
| ENSMUSG Crygc     | 0        | 0        | 0        | 0        | 0        | 0         |
| ENSMUSG Klf7      | 20.69232 | 21.80132 | 19.38309 | 11.7462  | 13.27834 | 11.910046 |
| ENSMUSG Creb1     | 12.40231 | 13.21183 | 11.14974 | 10.69603 | 10.07801 | 10.680575 |
| Mus_musc Mus_musc | 0.509165 | 0.121266 | 0.158048 | 0.46195  | 0.345439 | 0.404081  |
| ENSMUSG Gm42674   | 0        | 0        | 0        | 0        | 0        | 0         |
| Mus_musc Mus_musc | 0        | 0        | 0        | 0        | 0        | 0         |
| Mus_musc Mus_musc | 0        | 0        | 0        | 0        | 0        | 0         |
| ENSMUSG Spryd3    | 20.76151 | 16.8782  | 21.56223 | 15.60913 | 17.23674 | 17.282047 |
| ENSMUSG 9330182LC | 4.970704 | 4.224821 | 4.419391 | 3.380831 | 3.86124  | 4.046138  |
| ENSMUSG Rai1      | 8.241125 | 8.209041 | 8.615016 | 7.566308 | 8.306742 | 8.205654  |
| ENSMUSG Zfp954    | 5.026987 | 6.248833 | 5.488067 | 4.872154 | 5.926842 | 6.371428  |
| ENSMUSG Scfd2     | 2.773426 | 2.528991 | 2.584145 | 2.858657 | 3.338797 | 2.910141  |
| ENSMUSG 4921524J1 | 10.46947 | 8.967516 | 10.34285 | 8.100425 | 8.539028 | 7.599152  |
| ENSMUSG Aifm1     | 13.74886 | 13.81026 | 13.70012 | 13.41892 | 14.66172 | 14.048276 |
| ENSMUSG Nfkbid    | 1.346828 | 0.833057 | 1.572118 | 1.742126 | 1.221521 | 1.738938  |
| ENSMUSG Cox4i1    | 230.0846 | 234.8823 | 248.3406 | 268.0377 | 246.8989 | 280.20102 |
| ENSMUSG Try5      | 0        | 0        | 0        | 0        | 0        | 0         |
| ENSMUSG Git1      | 32.30863 | 32.32282 | 35.33065 | 24.84505 | 24.27971 | 25.985792 |
| ENSMUSG C8b       | 0        | 0        | 0        | 0        | 0        | 0         |
| ENSMUSG Hsph1     | 16.79231 | 40.73023 | 34.21029 | 26.44645 | 31.65595 | 32.255887 |
| ENSMUSG Arc       | 0.102479 | 0.145116 | 0.144881 | 0.549447 | 0.226903 | 0.630454  |
| ENSMUSG N4bp2l2   | 9.234624 | 10.18778 | 8.712815 | 8.937172 | 8.663253 | 10.315976 |
| ENSMUSG Cep97     | 1.650339 | 1.723525 | 1.426644 | 1.912078 | 1.765838 | 1.654198  |
| ENSMUSG Slc46a3   | 7.86805  | 8.250174 | 7.592629 | 7.728479 | 7.411093 | 7.053984  |
| ENSMUSG Mtus2     | 1.969195 | 2.19726  | 1.230725 | 0.985175 | 0.969511 | 1.337761  |
| ENSMUSG Wdr95     | 0.068375 | 0.16576  | 0.225098 | 0.272923 | 0.277718 | 0.518856  |
| ENSMUSG Medag     | 4.877992 | 5.044026 | 3.531012 | 4.094595 | 3.788723 | 4.016627  |
| ENSMUSG P3h2      | 5.617518 | 5.854564 | 6.025046 | 5.182639 | 5.416296 | 5.538547  |
| ENSMUSG Atg5      | 12.82567 | 13.16884 | 11.40141 | 14.36436 | 14.22497 | 15.346621 |
| ENSMUSG Plekhg6   | 0.896384 | 0.644079 | 0.519928 | 1.000896 | 0.733074 | 0.778004  |
| ENSMUSG Chmp6     | 15.6924  | 15.23039 | 17.21354 | 17.1227  | 16.43161 | 18.346928 |
| ENSMUSG Cdh9      | 0.042718 | 0.039242 | 0.014321 | 0        | 0        | 0         |
| ENSMUSG Rnf41     | 12.07878 | 14.0956  | 13.01945 | 11.06096 | 11.87872 | 10.556125 |
| ENSMUSG Baiap2    | 28.98009 | 24.78005 | 25.32347 | 21.18315 | 22.52806 | 23.554736 |
| ENSMUSG Aatk      | 6.445252 | 5.033676 | 5.711119 | 3.496678 | 3.836226 | 3.944336  |
| ENSMUSG Nabp2     | 20.50665 | 23.06615 | 23.57497 | 16.92555 | 18.74105 | 19.496206 |
| ENSMUSG Tepsin    | 4.619641 | 4.421601 | 4.96718  | 4.141647 | 3.544021 | 4.494144  |
| ENSMUSG Pigs      | 16.9764  | 15.74096 | 18.39263 | 19.45036 | 20.86785 | 22.87566  |
| Mus_musc Mus_musc | 0        | 0.202662 | 0        | 0        | 0        | 0         |
| ENSMUSG Ehmt2     | 31.893   | 30.64346 | 31.12026 | 31.82792 | 31.50429 | 35.728171 |
| ENSMUSG Fndc1     | 7.728462 | 5.46497  | 5.548611 | 5.148618 | 5.210674 | 4.302615  |
| Mus_musc Mus_musc | 1.26824  | 1.070321 | 3.501639 | 3.804353 | 3.058536 | 3.221671  |
| ENSMUSG Cga       | 0        | 0        | 0        | 0        | 0        | 0         |
| ENSMUSG Slc47a2   | 0.069137 | 0        | 0.08031  | 0.133678 | 0.083018 | 0.087018  |
| ENSMUSG Akirin2   | 21.74603 | 21.57778 | 20.09965 | 18.60478 | 16.04499 | 14.656189 |
| ENSMUSG Slc35a1   | 12.28859 | 12.90512 | 12.83864 | 11.44541 | 13.07778 | 11.715307 |
| ENSMUSG Rars2     | 6.628511 | 6.685564 | 5.163629 | 7.214171 | 6.96605  | 7.347089  |
| ENSMUSG Smim8     | 4.399012 | 5.800096 | 5.03076  | 5.356093 | 5.686774 | 4.174402  |
| ENSMUSG Cfap206   | 4.980975 | 6.393591 | 3.530576 | 6.278107 | 6.422419 | 6.37989   |
| ENSMUSG Gm20809   | 0        | 0        | 0        | 0        | 0        | 0         |
| ENSMUSG Glt1d1    | 0.019007 | 0        | 0.12325  | 0.015296 | 0.065969 | 0.043497  |
| ENSMUSG Gm49393   | 0        | 0        | 0        | 0        | 0        | 0         |
| ENSMUSG Epx       | 0        | 0        | 0        | 0.73787  | 1.561648 | 1.886933  |
| ENSMUSG Ndufaf2   | 4.690046 | 7.81793  | 5.619757 | 7.438575 | 5.47851  | 5.067404  |
| ENSMUSG Gm10234   | 0        | 0        | 0        | 0        | 0        | 0         |

|                   |          |          |          |          |          |           |
|-------------------|----------|----------|----------|----------|----------|-----------|
| ENSMUSG Olfr203   | 0        | 0        | 0        | 0        | 0        | 0         |
| ENSMUSG Abcg4     | 0.096014 | 0.168779 | 0.152361 | 0.082374 | 0.089541 | 0.165579  |
| ENSMUSG Mcam      | 82.48633 | 63.63154 | 97.24382 | 49.16383 | 52.36826 | 58.093706 |
| ENSMUSG Gm10330   | 0        | 0        | 0        | 0        | 0.020407 | 0         |
| ENSMUSG Mcpt9     | 0        | 0        | 0        | 0        | 0        | 0         |
| ENSMUSG Tbx5      | 13.94925 | 13.51588 | 13.92114 | 8.627739 | 9.445456 | 7.645753  |
| ENSMUSG Stambpl1  | 4.819254 | 3.535944 | 4.019002 | 5.368959 | 4.864369 | 4.237061  |
| ENSMUSG Ppp2r5b   | 18.30643 | 17.57335 | 20.51795 | 13.9824  | 14.64986 | 15.143274 |
| ENSMUSG Ankrd22   | 0.031942 | 0        | 0        | 0        | 0        | 0.087608  |
| ENSMUSG Nps       | 0        | 0        | 0        | 0        | 0        | 0         |
| ENSMUSG Atg2a     | 8.069843 | 7.007299 | 7.198901 | 7.519706 | 7.445202 | 7.553187  |
| ENSMUSG Lipn      | 0        | 0.028561 | 0        | 1.563086 | 1.692388 | 2.221318  |
| ENSMUSG Lipk      | 0        | 0        | 0        | 0        | 0        | 0         |
| ENSMUSG Tmem219   | 14.4846  | 15.0385  | 17.16684 | 17.42042 | 18.98029 | 16.891816 |
| ENSMUSG Fas       | 23.60424 | 23.43959 | 26.22582 | 16.74459 | 19.69647 | 15.164172 |
| ENSMUSG Bmi1      | 20.36658 | 20.47105 | 21.03306 | 16.57862 | 16.97527 | 15.466328 |
| ENSMUSG Pter      | 2.492248 | 2.805927 | 2.400248 | 2.305988 | 2.319066 | 2.483171  |
| ENSMUSG 4921504E  | 0        | 0        | 0        | 0.093248 | 0.010506 | 0.062099  |
| ENSMUSG Ptf1a     | 0        | 0        | 0        | 0        | 0        | 0         |
| ENSMUSG 4930426L  | 0.21458  | 0.118773 | 0.176578 | 0.038882 | 0.157262 | 0.42152   |
| ENSMUSG Pip4k2a   | 11.4558  | 11.55945 | 14.08545 | 15.70151 | 15.18312 | 14.993203 |
| ENSMUSG Trpm8     | 0        | 0.009193 | 0.004026 | 0        | 0        | 0         |
| ENSMUSG Igfbp7    | 239.5931 | 228.3823 | 232.9898 | 226.1828 | 245.0098 | 219.83967 |
| ENSMUSG Pnpla8    | 8.469892 | 8.489712 | 7.692462 | 7.193178 | 7.20157  | 6.573553  |
| ENSMUSG Pafah1b3  | 10.98671 | 10.75969 | 10.47686 | 21.09958 | 18.60598 | 19.562717 |
| ENSMUSG Cic       | 21.43166 | 22.30787 | 21.92493 | 23.90186 | 24.50099 | 23.50514  |
| ENSMUSG Nqo1      | 2.736445 | 3.177002 | 1.998899 | 1.010089 | 1.260023 | 1.603477  |
| ENSMUSG Nob1      | 10.84863 | 10.03252 | 10.811   | 9.593933 | 9.329732 | 9.456543  |
| ENSMUSG Nfat5     | 15.97324 | 16.73336 | 12.90948 | 11.67417 | 13.49136 | 11.649803 |
| ENSMUSG Olfr224   | 0        | 0        | 0        | 0        | 0        | 0         |
| ENSMUSG Naa38     | 10.65299 | 11.49331 | 14.69641 | 15.8327  | 15.24481 | 15.858739 |
| ENSMUSG Zc3h4     | 14.60951 | 13.31771 | 12.78451 | 12.27492 | 12.25217 | 12.567062 |
| ENSMUSG Cluh      | 11.62636 | 11.08686 | 10.01807 | 12.75611 | 12.54674 | 14.366845 |
| ENSMUSG Slc17a7   | 0.014643 | 0.838062 | 0.071273 | 0.206964 | 0.230948 | 0.137303  |
| ENSMUSG Hbq1a     | 0.14009  | 0.434569 | 0.30305  | 0.18943  | 0.111227 | 0         |
| ENSMUSG Nsg2      | 0.536829 | 0.538328 | 0.534054 | 0.492835 | 0.206604 | 0.614444  |
| ENSMUSG Mn1       | 1.026471 | 1.034997 | 1.077867 | 0.759989 | 0.758989 | 0.944075  |
| ENSMUSG 4930524B  | 0        | 0        | 0        | 0        | 0        | 0         |
| ENSMUSG Vmn2r121  | 0        | 0        | 0        | 0        | 0        | 0         |
| ENSMUSG Bard1     | 0.308546 | 0.362691 | 0.276853 | 0.413008 | 0.462723 | 0.686459  |
| ENSMUSG Zfand2b   | 10.62861 | 12.59032 | 12.62665 | 12.17044 | 10.7386  | 10.410342 |
| ENSMUSG Atic      | 12.39474 | 10.7677  | 10.94199 | 11.25248 | 10.90011 | 12.82221  |
| ENSMUSG Fn1       | 43.97601 | 45.66187 | 53.69318 | 175.6259 | 212.9841 | 237.68142 |
| ENSMUSG Gm49340   | 0        | 0        | 0.014623 | 0        | 0        | 0.035686  |
| ENSMUSG Abcb6     | 4.592934 | 4.484958 | 3.757975 | 4.811494 | 5.105251 | 4.666538  |
| ENSMUSG Ankzf1    | 6.815379 | 6.311392 | 8.237682 | 7.380824 | 6.326238 | 5.341852  |
| ENSMUSG Tet2      | 3.169384 | 3.425977 | 2.814592 | 3.662214 | 3.286634 | 3.521934  |
| ENSMUSG Arhgef1   | 66.14383 | 59.12407 | 66.80025 | 57.65258 | 56.01925 | 55.843356 |
| ENSMUSG Rcc2      | 22.0935  | 20.41903 | 22.01042 | 22.92835 | 24.71332 | 24.882399 |
| ENSMUSG Tas2r102  | 0        | 0        | 0        | 0        | 0        | 0         |
| ENSMUSG Adamts4   | 0.075958 | 0.068312 | 0.061547 | 0.092053 | 0.202558 | 0.269366  |
| ENSMUSG Gm28051   | 0.319365 | 0        | 0.648105 | 0        | 0        | 0         |
| Mus_musc Mus_musc | 0.222396 | 0.172667 | 0        | 0.046804 | 0        | 0.219436  |
| Mus_musc Mus_musc | 0.926317 | 0.716188 | 0.792257 | 0.880262 | 1.113114 | 0.962218  |
| Mus_musc Mus_musc | 0.729583 | 0.149086 | 0.640242 | 0.463389 | 0.155621 | 0.250171  |
| Mus_musc Mus_musc | 0        | 0        | 0        | 0.156033 | 0.146971 | 0         |
| Mus_musc Mus_musc | 0        | 0.149602 | 0        | 0.26726  | 0.113417 | 0.220987  |
| Mus_musc Mus_musc | 0.598179 | 0.145203 | 0        | 0.105551 | 0        | 0.227974  |
| Mus_musc Mus_musc | 0        | 0.103578 | 0.080774 | 0.331241 | 0        | 0         |
| ENSMUSG Foxj2     | 12.33161 | 10.41848 | 11.03305 | 8.85236  | 8.98809  | 8.689473  |
| ENSMUSG Vmn1r138  | 0        | 0        | 0        | 0        | 0        | 0         |
| ENSMUSG Slc2a3    | 3.79519  | 2.738946 | 4.594549 | 4.35453  | 3.988775 | 3.87802   |
| ENSMUSG Oaz1      | 329.2864 | 356.7394 | 382.1491 | 359.6681 | 346.3292 | 290.1318  |
| ENSMUSG Fam169b   | 1.308739 | 1.812079 | 1.035552 | 2.503731 | 2.316411 | 2.962323  |

|                   |          |          |          |          |          |           |
|-------------------|----------|----------|----------|----------|----------|-----------|
| ENSMUSG Pcyt1b    | 0.457346 | 0.480717 | 0.260662 | 0.68733  | 0.675298 | 0.796973  |
| Mus_musc Mus_musc | 0.457443 | 0.609436 | 0.438484 | 0.452957 | 0.551214 | 0.224839  |
| Mus_musc Mus_musc | 1.141288 | 0.566431 | 0.718596 | 0.650134 | 0.402653 | 0.23202   |
| Mus_musc Mus_musc | 0        | 0        | 0        | 0        | 0        | 0.292934  |
| Mus_musc Mus_musc | 0        | 0.342135 | 0.24089  | 0.143454 | 0.26471  | 0.30104   |
| Mus_musc Mus_musc | 0        | 0.208572 | 0        | 0        | 0        | 0         |
| Mus_musc Mus_musc | 0        | 0        | 0.090184 | 0        | 0.637281 | 0         |
| ENSMUSG Dsg1a     | 0        | 0.018251 | 0        | 0.018179 | 0.004619 | 0.009718  |
| ENSMUSG Tmem130   | 0        | 0        | 0        | 0        | 0.019967 | 0         |
| ENSMUSG 4930556J2 | 0.021566 | 0.046586 | 0.015191 | 0        | 0        | 0.10041   |
| ENSMUSG Olfr71    | 0.055068 | 0.1479   | 0        | 0.055596 | 0.000414 | 0.052494  |
| ENSMUSG Tmem150l  | 1.636484 | 0.884598 | 1.738253 | 1.210546 | 1.200523 | 1.17833   |
| Mus_musc Mus_musc | 0        | 0        | 0        | 0        | 0.186692 | 0         |
| Mus_musc Mus_musc | 0        | 0        | 0        | 0        | 0        | 0         |
| ENSMUSG Olfr1380  | 0        | 0        | 0        | 0        | 0        | 0         |
| Mus_musc Mus_musc | 0        | 0        | 0        | 0.11378  | 0.119457 | 0         |
| Mus_musc Mus_musc | 0.14069  | 0.064843 | 0        | 0        | 0        | 0.104176  |
| Mus_musc Mus_musc | 0.897419 | 1.064527 | 1.090338 | 0.483664 | 0.557488 | 1.165689  |
| ENSMUSG Khl14     | 0.188839 | 0.100233 | 0.127609 | 0.309987 | 0.138616 | 0.148915  |
| ENSMUSG Mum111    | 1.03081  | 1.101433 | 1.111808 | 1.014174 | 0.908176 | 0.783644  |
| ENSMUSG AA986860  | 38.40179 | 50.15802 | 37.09919 | 20.44376 | 30.20837 | 24.059669 |
| ENSMUSG Dyrk1b    | 13.11108 | 11.10129 | 11.02467 | 9.820276 | 11.43907 | 9.250372  |
| ENSMUSG Olfr957   | 0        | 0        | 0        | 0        | 0        | 0         |
| ENSMUSG Olfr1265  | 0        | 0        | 0        | 0        | 0        | 0         |
| Mus_musc Mus_musc | 0.389393 | 0.678665 | 0.085321 | 0.462728 | 0.340698 | 0.549074  |
| Mus_musc Mus_musc | 0        | 0        | 0        | 0        | 0        | 0.038479  |
| Mus_musc Mus_musc | 0        | 0        | 0        | 0        | 0        | 0.191422  |
| ENSMUSG Abca7     | 7.503427 | 6.813696 | 8.568847 | 8.860918 | 7.922766 | 8.839202  |
| ENSMUSG Bnip3     | 27.95676 | 34.21125 | 27.14993 | 21.2113  | 22.44307 | 22.786597 |
| ENSMUSG Supt16    | 18.95575 | 17.54131 | 17.70989 | 17.84839 | 17.7157  | 16.826799 |
| ENSMUSG Prkx      | 17.06734 | 18.43869 | 17.22451 | 14.96539 | 15.90406 | 15.428565 |
| ENSMUSG Erich2    | 3.336828 | 4.060043 | 4.021837 | 5.171993 | 5.087461 | 5.129218  |
| ENSMUSG Sp5       | 2.047304 | 1.255269 | 1.215616 | 1.493473 | 1.378679 | 2.028855  |
| ENSMUSG Khl41     | 0.307215 | 0.868501 | 0.188776 | 0.202984 | 0.438494 | 0.420154  |
| ENSMUSG Tmem186   | 4.257747 | 4.356182 | 4.346583 | 3.945924 | 3.863902 | 4.203069  |
| ENSMUSG Napb      | 0.887643 | 1.042619 | 1.293036 | 0.872132 | 0.656808 | 0.854665  |
| ENSMUSG Olfr1110  | 0        | 0        | 0        | 0        | 0        | 0         |
| ENSMUSG Osgin2    | 7.079781 | 8.488898 | 6.080114 | 5.837308 | 5.982594 | 5.203182  |
| ENSMUSG Mpl       | 0.205389 | 0.151837 | 0.256074 | 0.24527  | 0.135979 | 0.2071    |
| Mus_musc Mus_musc | 0        | 0        | 0.035369 | 0        | 0.231437 | 0         |
| Mus_musc Mus_musc | 0.102485 | 0.123694 | 0.069732 | 0.424822 | 0.242679 | 0.22955   |
| ENSMUSG Ocll      | 8.967459 | 7.763199 | 8.008522 | 8.113442 | 6.747574 | 8.645776  |
| Mus_musc Mus_musc | 0        | 0        | 0        | 0        | 0.373385 | 0         |
| Mus_musc Mus_musc | 0.582478 | 0.38526  | 0.365357 | 0.287123 | 0.271387 | 0.210406  |
| ENSMUSG Tek       | 140.4685 | 133.9477 | 143.9665 | 85.40068 | 92.82274 | 79.856059 |
| Mus_musc Mus_musc | 0        | 0        | 0.126376 | 0        | 0.551438 | 0         |
| ENSMUSG Olfr1137  | 0        | 0        | 0        | 0        | 0        | 0         |
| ENSMUSG Scp2d1    | 0        | 0        | 0        | 0        | 0        | 0         |
| ENSMUSG Arf3      | 66.79898 | 58.42835 | 63.19878 | 50.64084 | 52.51557 | 54.712514 |
| ENSMUSG Rtl8c     | 34.12606 | 28.26476 | 32.37381 | 21.30808 | 24.32401 | 22.145065 |
| ENSMUSG Xrn2      | 30.02019 | 27.66702 | 28.44216 | 25.45501 | 22.99428 | 24.325268 |
| ENSMUSG Mest      | 6.427003 | 5.099018 | 6.885746 | 5.983925 | 6.877086 | 7.767383  |
| ENSMUSG Cd93      | 87.88438 | 85.30488 | 80.05673 | 49.9961  | 59.71616 | 50.72691  |
| ENSMUSG Lsm10     | 12.02065 | 10.79445 | 13.67326 | 11.53858 | 12.32882 | 12.282079 |
| ENSMUSG Kctd2     | 13.73843 | 13.95175 | 14.47426 | 12.87779 | 10.59462 | 12.821907 |
| ENSMUSG Tmprss6   | 0.062955 | 0        | 0        | 0.092678 | 0        | 0.052625  |
| ENSMUSG 4933400A  | 0        | 0        | 0        | 0        | 0        | 0         |
| ENSMUSG Kctd5     | 11.99237 | 11.00093 | 10.1621  | 9.016252 | 10.26311 | 10.160589 |
| Mus_musc Mus_musc | 0        | 0        | 0        | 0        | 0.190093 | 0         |
| Mus_musc Mus_musc | 0.142783 | 0.304493 | 0        | 0.27917  | 0        | 0         |
| Mus_musc Mus_musc | 1.618465 | 1.197229 | 1.895443 | 1.647277 | 1.627534 | 1.572913  |
| Mus_musc Mus_musc | 0.422917 | 0.536107 | 0.701133 | 0.839448 | 0.771516 | 0.566108  |
| Mus_musc Mus_musc | 0        | 0        | 0        | 1.024564 | 0.87393  | 1.323134  |
| Mus_musc Mus_musc | 0.477694 | 0        | 0.079865 | 0        | 0        | 0.05805   |

|                   |          |          |          |          |          |           |
|-------------------|----------|----------|----------|----------|----------|-----------|
| Mus_musc Mus_musc | 0.183629 | 0        | 0        | 0        | 0        | 0         |
| ENSMUSG Mical3    | 4.14881  | 5.167671 | 4.654273 | 4.79555  | 5.008811 | 4.964231  |
| ENSMUSG Otud6a    | 0.032308 | 0.079541 | 0        | 0        | 0        | 0         |
| ENSMUSG G430095P  | 1.054482 | 0.991876 | 0.915833 | 0.560091 | 0.490758 | 0.572563  |
| ENSMUSG En1       | 0        | 0        | 0        | 0        | 0        | 0         |
| ENSMUSG Olfr69    | 0        | 0        | 0        | 0        | 0        | 0         |
| ENSMUSG Nkx2-9    | 0.247833 | 0.409823 | 0.075112 | 0.145802 | 0.187739 | 0.150089  |
| ENSMUSG Zfp704    | 7.077221 | 7.965393 | 5.825923 | 5.981707 | 5.994885 | 6.121072  |
| ENSMUSG Pclaf     | 0.527571 | 0.643049 | 0.775346 | 4.119961 | 4.104288 | 4.591314  |
| ENSMUSG Cuzd1     | 0        | 0.010465 | 0        | 0        | 0        | 0         |
| ENSMUSG Olfr1342  | 0.404648 | 0.19647  | 0.440585 | 0.495404 | 0.34166  | 0.30274   |
| ENSMUSG Myt1l     | 0        | 0        | 0.031221 | 0        | 0.011665 | 0.013744  |
| ENSMUSG Wisp1     | 3.428534 | 2.86526  | 2.590487 | 1.977659 | 1.758981 | 1.482416  |
| ENSMUSG Ndrgr1    | 13.88572 | 13.60905 | 14.81317 | 9.913077 | 10.27576 | 10.311625 |
| Mus_musc Mus_musc | 0.141153 | 0.095646 | 0.262479 | 0        | 0.140148 | 0.234419  |
| Mus_musc Mus_musc | 0.304386 | 0.241063 | 0.208997 | 0.342416 | 0.109064 | 0.354589  |
| Mus_musc Mus_musc | 0        | 0        | 0        | 0        | 0.186692 | 0         |
| Mus_musc Mus_musc | 0        | 0        | 0        | 0        | 0        | 0.099336  |
| Mus_musc Mus_musc | 0        | 0        | 0.210068 | 0.226978 | 0        | 0         |
| Mus_musc Mus_musc | 0.126707 | 0        | 0        | 0        | 0.098047 | 0         |
| Mus_musc Mus_musc | 0        | 0.156063 | 0        | 0        | 0.223288 | 0         |
| Mus_musc Mus_musc | 0        | 0        | 0        | 0        | 0        | 0         |
| ENSMUSG Olfr814   | 0        | 0        | 0        | 0        | 0        | 0         |
| ENSMUSG Dennd6b   | 1.901124 | 1.426508 | 1.799241 | 1.416975 | 1.610864 | 1.457133  |
| ENSMUSG Olfr539   | 0        | 0        | 0        | 0.004545 | 0        | 0         |
| ENSMUSG Hist1h4j  | 0.333226 | 0.11324  | 0.098219 | 0.387676 | 0.118914 | 0.328156  |
| ENSMUSG H2-T22    | 52.44066 | 42.54416 | 112.6378 | 74.08541 | 50.78551 | 62.648619 |
| ENSMUSG Pcdh19    | 0.984868 | 0.879297 | 0.864332 | 0.361034 | 0.347728 | 0.510011  |
| ENSMUSG Gm7792    | 0        | 0        | 0        | 0        | 0        | 0         |
| ENSMUSG Nup160    | 6.807307 | 7.100385 | 6.129301 | 5.765494 | 5.871677 | 5.982391  |
| ENSMUSG Rpl36     | 262.284  | 282.4974 | 301.3098 | 338.7874 | 260.3703 | 322.41211 |
| ENSMUSG Ascl5     | 0        | 0        | 0        | 0        | 0        | 0         |
| ENSMUSG Gm27021   | 0.134958 | 0.081885 | 0        | 0.204262 | 0        | 0.215498  |
| ENSMUSG Gm3278    | 0        | 0        | 0        | 0        | 0        | 0         |
| ENSMUSG Gm21882   | 0        | 0        | 0        | 0        | 0        | 0         |
| ENSMUSG Olfr150   | 0        | 0        | 0        | 0        | 0        | 0         |
| ENSMUSG Btdb35f19 | 0        | 0        | 0        | 0        | 0        | 0         |
| ENSMUSG Gm5141    | 0.868682 | 0.859219 | 0.705359 | 0.888574 | 0.840903 | 0.697818  |
| ENSMUSG Mroh6     | 0        | 0.035931 | 0.136079 | 0.08528  | 0.122833 | 0.036073  |
| Mus_musc Mus_musc | 0        | 0        | 0.337872 | 0        | 0        | 0         |
| Mus_musc Mus_musc | 10.90641 | 12.39746 | 14.88026 | 14.53317 | 11.2524  | 10.430141 |
| Mus_musc Mus_musc | 0        | 0        | 0        | 0.187467 | 0        | 0         |
| Mus_musc Mus_musc | 92.09269 | 79.92086 | 88.47761 | 85.50343 | 81.6416  | 83.225544 |
| Mus_musc Mus_musc | 0        | 0        | 0.046073 | 0        | 0        | 0         |
| ENSMUSG Zfp358    | 12.7455  | 13.22865 | 13.41887 | 9.865479 | 9.895936 | 9.093115  |
| ENSMUSG Gap43     | 11.74733 | 10.94955 | 11.69015 | 8.608162 | 6.275493 | 6.974498  |
| ENSMUSG Emc6      | 39.09708 | 40.62927 | 36.80598 | 37.52556 | 35.45407 | 36.310792 |
| ENSMUSG BC051142  | 0.044557 | 0.081123 | 0.153047 | 0.140845 | 0.247014 | 0.09414   |
| ENSMUSG Ms4a13    | 0        | 0        | 0        | 0        | 0        | 0         |
| ENSMUSG Olfr644   | 0        | 0        | 0        | 0        | 0        | 0         |
| ENSMUSG Fnta      | 36.4324  | 34.74689 | 33.30685 | 25.43291 | 30.96999 | 30.192278 |
| Mus_musc Mus_musc | 0.103096 | 0        | 0        | 0.346008 | 0.218818 | 0.173959  |
| Mus_musc Mus_musc | 0.742952 | 0.71574  | 0.230424 | 0.651583 | 0.418173 | 0.627642  |
| ENSMUSG Ptprs     | 9.192571 | 9.48333  | 8.146441 | 9.645539 | 9.061557 | 8.009264  |
| ENSMUSG Tmem200c  | 0.087756 | 0        | 0.057241 | 0.036384 | 0.034213 | 0         |
| ENSMUSG Olfr804   | 0        | 0        | 0        | 0        | 0        | 0         |
| ENSMUSG Gm13043   | 0        | 0        | 0        | 0        | 0        | 0         |
| ENSMUSG Ddo       | 3.001714 | 2.929995 | 1.992982 | 3.709611 | 3.24363  | 2.982227  |
| ENSMUSG Lce1d     | 0        | 0        | 0        | 0        | 0        | 0         |
| ENSMUSG Olfr823   | 0        | 0        | 0        | 0        | 0        | 0         |
| ENSMUSG Gm6367    | 0        | 0        | 0        | 0        | 0        | 0         |
| ENSMUSG Swt1      | 8.796536 | 9.859424 | 8.015406 | 7.714842 | 8.392652 | 7.057043  |
| ENSMUSG Vmn2r32   | 0        | 0        | 0        | 0        | 0        | 0         |
| ENSMUSG Ccdc142   | 0.913334 | 0.891857 | 1.084124 | 1.165125 | 0.828251 | 0.81363   |

|                   |          |          |          |          |          |           |
|-------------------|----------|----------|----------|----------|----------|-----------|
| ENSMUSG Gm9955    | 0        | 0        | 0        | 0        | 0        | 0         |
| ENSMUSG Abca15    | 0        | 0        | 0        | 0        | 0        | 0         |
| ENSMUSG Pcdhga6   | 2.879523 | 2.625393 | 1.44179  | 1.559643 | 1.619816 | 1.623114  |
| ENSMUSG Ints2     | 2.414032 | 2.679051 | 2.238986 | 2.996112 | 2.666084 | 2.837003  |
| ENSMUSG Gm47959   | 0        | 0        | 0        | 0        | 0        | 0         |
| ENSMUSG Chia1     | 50.21716 | 62.68214 | 61.15258 | 527.2566 | 669.3724 | 605.61996 |
| ENSMUSG Tex101    | 0        | 0        | 0        | 0.018733 | 0        | 0         |
| ENSMUSG Hyal3     | 0.944654 | 0.644286 | 0.332727 | 0.658721 | 0.631853 | 0.687276  |
| ENSMUSG Arl5a     | 26.66301 | 25.5729  | 23.02006 | 23.66696 | 25.09016 | 22.278311 |
| ENSMUSG Snx9      | 20.75529 | 20.585   | 19.82236 | 20.73827 | 21.30622 | 20.471739 |
| ENSMUSG Dgkb      | 0.435923 | 0.397771 | 0.373167 | 0.540641 | 0.335097 | 0.17272   |
| ENSMUSG Sif2      | 9.150285 | 9.203471 | 7.760971 | 6.916358 | 7.317806 | 7.103157  |
| ENSMUSG Myrf      | 16.74469 | 12.75914 | 13.70956 | 10.02451 | 8.53163  | 12.966051 |
| ENSMUSG Vezt      | 3.299436 | 3.958101 | 3.475994 | 2.928244 | 3.460528 | 2.912216  |
| ENSMUSG Exosc10   | 17.98952 | 15.40521 | 18.3271  | 15.25649 | 16.51127 | 15.196426 |
| ENSMUSG Gm13305   | 0.148846 | 0.144743 | 0.29026  | 0.118172 | 0.05127  | 0.20014   |
| ENSMUSG Mam13     | 4.051456 | 4.17329  | 3.386968 | 2.944165 | 3.061087 | 3.191436  |
| ENSMUSG Hist2h3c1 | 4.943596 | 4.43434  | 4.032259 | 4.620871 | 5.042582 | 3.97253   |
| ENSMUSG Med10     | 18.85558 | 17.10588 | 19.59883 | 19.09116 | 17.23295 | 17.978224 |
| ENSMUSG Tacr2     | 0.504554 | 0.08064  | 0.212928 | 0        | 0.083755 | 0.266491  |
| ENSMUSG Tmem11    | 19.16431 | 18.26398 | 20.14194 | 17.73328 | 15.84166 | 16.149668 |
| ENSMUSG Gm28363   | 0        | 0        | 0        | 0        | 0        | 0         |
| ENSMUSG Pnpla1    | 0.022435 | 0        | 0        | 0        | 0        | 0         |
| ENSMUSG Dnase1l1  | 14.13514 | 16.83459 | 17.94872 | 18.58274 | 16.82864 | 19.135262 |
| ENSMUSG Vmn1r171  | 0        | 0        | 0        | 0        | 0        | 0         |
| ENSMUSG Acat3     | 1.049311 | 1.139905 | 1.863045 | 1.984344 | 2.29952  | 2.598848  |
| ENSMUSG Atp6ap1   | 83.26115 | 82.02933 | 94.25245 | 82.7021  | 83.88463 | 88.065259 |
| ENSMUSG Mfsd3     | 1.553934 | 1.542131 | 1.4318   | 1.8479   | 1.63843  | 1.919201  |
| ENSMUSG Ifit3b    | 18.3424  | 15.33296 | 23.23754 | 10.67487 | 9.723513 | 7.971823  |
| ENSMUSG Tmem35a   | 1.662578 | 1.687426 | 1.173745 | 1.052716 | 0.642619 | 1.433637  |
| ENSMUSG Fa2h      | 0.10821  | 0.069476 | 0.129278 | 0.125764 | 0.033713 | 0.217594  |
| ENSMUSG Zxdb      | 1.942138 | 3.613374 | 5.248476 | 1.853091 | 3.018907 | 3.188366  |
| ENSMUSG Apol6     | 0.319043 | 0.382016 | 0.383947 | 0.929357 | 0.29911  | 0.710492  |
| ENSMUSG Myo6      | 18.01225 | 17.44652 | 15.24551 | 12.47885 | 13.39442 | 12.03887  |
| ENSMUSG Elob      | 101.7266 | 107.6633 | 113.5285 | 101.2646 | 99.33381 | 107.42882 |
| ENSMUSG Olfr357   | 0        | 0        | 0        | 0        | 0        | 0         |
| ENSMUSG Rd3l      | 0        | 0        | 0        | 0        | 0        | 0         |
| ENSMUSG Hist2h4   | 1.417042 | 1.984531 | 1.313352 | 1.34996  | 1.117634 | 1.167605  |
| ENSMUSG Vmn2r117  | 0        | 0        | 0        | 0        | 0        | 0         |
| ENSMUSG Zfp1      | 4.198527 | 3.810183 | 3.314514 | 3.78402  | 3.525164 | 3.534559  |
| ENSMUSG Zfp2      | 2.141116 | 2.530829 | 1.693613 | 1.163505 | 1.404941 | 0.965467  |
| ENSMUSG Sytl1     | 2.059961 | 1.900432 | 1.471531 | 2.789119 | 2.827373 | 3.738238  |
| ENSMUSG Kmt5a     | 18.71133 | 25.91198 | 19.71606 | 24.45386 | 26.20704 | 23.85293  |
| ENSMUSG Pradc1    | 7.546764 | 8.753082 | 8.668249 | 7.880632 | 9.191992 | 9.291943  |
| ENSMUSG Paip2     | 108.0973 | 119.26   | 111.6936 | 92.67152 | 86.86055 | 84.170212 |
| ENSMUSG Azgp1     | 0.100342 | 0.1975   | 0.105373 | 0.077549 | 0        | 0         |
| ENSMUSG Add2      | 0.026381 | 0.010109 | 0.041243 | 0.006423 | 0        | 0         |
| ENSMUSG Dusp11    | 21.60573 | 20.47096 | 20.32129 | 17.67479 | 17.4504  | 16.62376  |
| ENSMUSG Nat8      | 0.21884  | 0.1348   | 0.336067 | 0.143533 | 0.148789 | 0.178446  |
| ENSMUSG Cct7      | 50.36453 | 57.85553 | 59.53648 | 52.54372 | 52.61947 | 54.928371 |
| ENSMUSG Myh3      | 0.038691 | 0.037484 | 0.029104 | 0.033903 | 0.066554 | 0.076991  |
| ENSMUSG Pik3r5    | 6.455008 | 4.879986 | 6.913528 | 13.61043 | 15.55522 | 16.771387 |
| ENSMUSG Myh10     | 31.11233 | 28.09287 | 29.73986 | 19.33075 | 18.24732 | 18.001373 |
| ENSMUSG Stx8      | 5.549656 | 5.893251 | 6.007668 | 5.388222 | 5.243371 | 5.935224  |
| ENSMUSG Ntn1      | 20.6706  | 18.6282  | 22.63217 | 14.58183 | 14.17439 | 15.498605 |
| ENSMUSG Usp43     | 3.507423 | 3.477351 | 3.126717 | 2.406638 | 2.586646 | 3.003227  |
| ENSMUSG Cfap52    | 2.241316 | 3.434659 | 1.636307 | 3.868638 | 3.472646 | 3.648173  |
| ENSMUSG Rcvrn     | 0        | 0        | 0        | 0        | 0.091192 | 0         |
| ENSMUSG Map2k3    | 41.0379  | 41.76965 | 41.78399 | 33.66017 | 36.3188  | 36.529942 |
| ENSMUSG Natd1     | 9.817635 | 9.018664 | 9.173083 | 8.550818 | 9.078501 | 9.961175  |
| ENSMUSG Ccl4      | 0.731328 | 0.756115 | 2.053342 | 2.560674 | 2.443973 | 2.855166  |
| ENSMUSG Olfr136   | 0        | 0        | 0        | 0        | 0        | 0         |
| ENSMUSG 1810010D  | 2.348384 | 1.815086 | 1.469307 | 3.468187 | 4.214543 | 2.945944  |
| ENSMUSG Tmem151l  | 0        | 0.023012 | 0.041419 | 0.025465 | 0        | 0.025847  |

|                   |          |          |          |          |          |           |
|-------------------|----------|----------|----------|----------|----------|-----------|
| ENSMUSG Gm8890    | 0        | 0        | 0        | 0.449676 | 0.350496 | 0.476513  |
| ENSMUSG Speer2    | 0        | 0        | 0        | 0        | 0        | 0         |
| ENSMUSG Numbl     | 4.939402 | 4.251015 | 4.32451  | 3.835701 | 4.216541 | 3.569809  |
| ENSMUSG Gm17651   | 0        | 0        | 0        | 0        | 0        | 0         |
| ENSMUSG 1700049E1 | 0        | 0        | 0        | 0        | 0        | 0         |
| ENSMUSG Gulp1     | 8.384224 | 8.283592 | 7.39504  | 6.905727 | 6.688428 | 5.72877   |
| ENSMUSG Ldlrad3   | 11.54871 | 10.93146 | 9.694309 | 8.13466  | 8.294984 | 8.049905  |
| ENSMUSG Atp8b1    | 4.557339 | 5.042636 | 4.579154 | 3.927671 | 4.668628 | 4.14848   |
| ENSMUSG Khlh6     | 6.744575 | 5.893044 | 7.711593 | 8.313223 | 8.02402  | 7.523958  |
| ENSMUSG Gng2      | 13.73517 | 12.19111 | 10.72124 | 11.26109 | 9.639022 | 9.532545  |
| ENSMUSG Foxp3     | 0.343803 | 0.16931  | 0.318922 | 0.827993 | 0.487997 | 0.639753  |
| ENSMUSG Cep104    | 14.52853 | 14.44218 | 13.44673 | 11.00622 | 10.92838 | 10.775736 |
| ENSMUSG Igf2      | 2.439747 | 3.212079 | 1.951158 | 1.614436 | 1.292853 | 1.296206  |
| ENSMUSG Gja3      | 0        | 0.070912 | 0.018201 | 0        | 0        | 0.017779  |
| ENSMUSG E130311K1 | 2.499442 | 1.509784 | 1.809162 | 1.941978 | 2.003414 | 1.989773  |
| ENSMUSG Lias      | 7.885896 | 8.47791  | 9.454397 | 9.982691 | 7.563282 | 7.998346  |
| ENSMUSG Grpel1    | 9.42431  | 11.00877 | 10.4674  | 10.08695 | 9.5734   | 10.507184 |
| ENSMUSG Klb       | 0        | 0        | 0        | 0.065625 | 0.015769 | 0.031218  |
| ENSMUSG Tada2b    | 12.20175 | 12.48731 | 11.59602 | 9.893535 | 9.804605 | 10.22872  |
| ENSMUSG Rfc1      | 11.27752 | 10.40804 | 10.10649 | 9.40154  | 9.67748  | 9.24484   |
| ENSMUSG D5Ertd579 | 16.55481 | 16.72458 | 15.26986 | 11.95254 | 12.48417 | 12.096866 |
| ENSMUSG Cckar     | 26.07923 | 29.79289 | 17.87645 | 17.82673 | 19.49125 | 19.011443 |
| ENSMUSG Tbc1d14   | 11.68371 | 12.11784 | 12.86204 | 14.43915 | 14.04236 | 15.675473 |
| ENSMUSG Rbm10     | 15.62377 | 16.58237 | 15.34413 | 16.06403 | 16.56961 | 15.89438  |
| ENSMUSG Cdk16     | 30.40832 | 30.36613 | 31.23142 | 26.29541 | 27.3562  | 27.671093 |
| ENSMUSG Usp11     | 4.714444 | 4.76071  | 4.475419 | 4.605856 | 3.877245 | 5.054443  |
| ENSMUSG Glrx3     | 29.8286  | 31.09162 | 29.69791 | 30.92659 | 30.62231 | 31.83443  |
| ENSMUSG Sfi1      | 16.02271 | 12.2359  | 12.3848  | 13.54236 | 11.65972 | 12.383208 |
| ENSMUSG Dnajc25   | 2.755034 | 2.753894 | 2.032484 | 2.414512 | 2.900913 | 3.077656  |
| ENSMUSG Actl7a    | 0        | 0.044977 | 0.021885 | 0        | 0        | 0.033964  |
| ENSMUSG Maco1     | 20.55253 | 20.83551 | 18.52251 | 15.35211 | 16.31623 | 15.80344  |
| ENSMUSG Tmem109   | 52.37458 | 54.23241 | 53.82568 | 41.48975 | 43.75361 | 41.246615 |
| ENSMUSG Rhd       | 0.055919 | 0.170765 | 0.095961 | 0.038964 | 0.048338 | 0.130541  |
| ENSMUSG Tmem50a   | 119.6873 | 115.3865 | 122.474  | 112.0588 | 109.0055 | 106.67824 |
| ENSMUSG Sfpq      | 42.56462 | 41.23707 | 42.09667 | 34.34094 | 36.23496 | 37.527561 |
| ENSMUSG Syf2      | 68.28336 | 73.71085 | 72.05769 | 58.61535 | 55.10929 | 50.033546 |
| ENSMUSG Cd300a    | 2.562749 | 2.178603 | 2.632179 | 5.540928 | 5.142005 | 5.898912  |
| ENSMUSG Ythdc2    | 1.996978 | 2.224404 | 2.024433 | 1.845288 | 1.527125 | 1.537017  |
| ENSMUSG Cacna1a   | 0.234695 | 0.212093 | 0.18538  | 0.933914 | 0.778415 | 1.050995  |
| ENSMUSG Gm16368   | 0        | 0        | 0        | 0        | 0        | 0         |
| ENSMUSG Pde4d     | 6.660525 | 7.882591 | 5.628423 | 5.136978 | 5.52715  | 5.228146  |
| ENSMUSG Gm30302   | 0        | 0        | 0        | 0        | 0        | 0         |
| ENSMUSG Dimt1     | 3.624205 | 3.102172 | 2.646558 | 1.535185 | 2.079642 | 2.801007  |
| ENSMUSG Kif2a     | 7.172651 | 6.294681 | 6.210635 | 6.363989 | 5.719612 | 5.410095  |
| ENSMUSG Jmy       | 8.494517 | 9.127123 | 6.577615 | 5.935367 | 6.671358 | 5.128189  |
| ENSMUSG Elovl7    | 1.927404 | 1.845097 | 1.673187 | 1.725288 | 1.835277 | 1.658778  |
| ENSMUSG Depdc1b   | 0.300205 | 0.363467 | 0.317637 | 0.514784 | 1.130862 | 1.099728  |
| ENSMUSG Ercc8     | 3.701063 | 4.094164 | 3.653435 | 3.110731 | 2.497086 | 3.053448  |
| ENSMUSG PspH      | 10.81256 | 12.10012 | 8.987195 | 11.91156 | 11.97604 | 12.612846 |
| ENSMUSG Hpd       | 0        | 0        | 0        | 0        | 0        | 0         |
| ENSMUSG Mief1     | 6.177035 | 5.936108 | 6.329096 | 6.581615 | 5.859758 | 5.890097  |
| ENSMUSG Syngr1    | 3.750618 | 3.638486 | 4.043364 | 5.466161 | 4.035182 | 6.849846  |
| ENSMUSG Wdr66     | 3.072651 | 3.081786 | 2.05672  | 3.553746 | 3.534137 | 3.235675  |
| ENSMUSG Cacna1i   | 0.395056 | 0.206592 | 0.14707  | 0.647113 | 0.378595 | 0.426824  |
| ENSMUSG Deptor    | 10.15521 | 10.17618 | 7.342902 | 8.316666 | 8.917792 | 8.867721  |
| ENSMUSG Rhof      | 3.569455 | 2.163858 | 5.3902   | 4.012312 | 4.18293  | 6.246995  |
| ENSMUSG Apobr     | 5.419974 | 4.7801   | 8.007555 | 7.820467 | 7.312162 | 7.715747  |
| ENSMUSG Retreg3   | 28.27182 | 30.60807 | 29.01478 | 27.37719 | 28.99377 | 27.263988 |
| ENSMUSG Tmem108   | 1.706007 | 1.435992 | 0.998945 | 1.150029 | 0.56471  | 1.351674  |
| ENSMUSG Bex2      | 18.96025 | 16.04688 | 16.60738 | 10.0806  | 8.337685 | 7.767234  |
| ENSMUSG Nmnat2    | 1.804061 | 1.37404  | 1.599616 | 1.014342 | 1.092781 | 0.942869  |
| ENSMUSG Abcc12    | 0.031997 | 0        | 0.029554 | 0.070776 | 0.042477 | 0.032152  |
| ENSMUSG 2410004B1 | 10.25196 | 9.530081 | 11.95502 | 6.918437 | 9.381441 | 9.79244   |
| ENSMUSG Fgfr1op   | 5.742985 | 6.628078 | 5.955166 | 7.306653 | 6.337413 | 7.379273  |

|                   |          |          |          |          |          |           |
|-------------------|----------|----------|----------|----------|----------|-----------|
| ENSMUSG Dna2      | 1.47804  | 1.6259   | 2.015188 | 1.802197 | 2.059147 | 2.204895  |
| ENSMUSG Mlx       | 15.30386 | 15.68799 | 16.19934 | 15.29021 | 15.20718 | 15.177103 |
| ENSMUSG Prdm4     | 7.256779 | 8.301268 | 8.26099  | 7.392897 | 6.619149 | 7.014604  |
| ENSMUSG Npffr2    | 0        | 0.028082 | 0        | 0.099347 | 0.108402 | 0.069056  |
| ENSMUSG Gnptg     | 23.91702 | 24.59709 | 23.83443 | 23.79455 | 24.07318 | 23.031099 |
| ENSMUSG Vmn1r172  | 0        | 0        | 0        | 0        | 0        | 0         |
| ENSMUSG Tsga8     | 0        | 0        | 0        | 0        | 0        | 0         |
| ENSMUSG Toporsl   | 0        | 0        | 0        | 0        | 0        | 0         |
| ENSMUSG Zfp446    | 2.062581 | 1.462269 | 1.488999 | 1.672277 | 1.727174 | 1.954917  |
| ENSMUSG Jcad      | 108.599  | 111.5406 | 91.97014 | 50.93137 | 63.18743 | 50.549338 |
| ENSMUSG Rnf225    | 1.106129 | 0.898653 | 0.638192 | 0.723196 | 0.779624 | 0.745673  |
| ENSMUSG Cdkl4     | 2.428556 | 2.438842 | 1.326502 | 2.655236 | 3.038536 | 2.55672   |
| ENSMUSG Slc16a2   | 7.4411   | 8.405711 | 6.421059 | 6.82039  | 6.72686  | 7.545559  |
| ENSMUSG Zbtb41    | 5.107473 | 5.581925 | 4.357443 | 4.15895  | 5.796994 | 5.433499  |
| ENSMUSG Polr1e    | 1.319673 | 2.070647 | 2.322315 | 1.532014 | 2.14709  | 2.018057  |
| ENSMUSG Gm47995   | 0        | 0        | 0        | 0        | 0        | 0         |
| ENSMUSG Coq2      | 15.81467 | 15.56075 | 19.461   | 13.82695 | 12.61375 | 14.655898 |
| ENSMUSG Vps54     | 18.58569 | 19.91634 | 18.07988 | 16.65309 | 16.90249 | 14.631371 |
| ENSMUSG Avpr1a    | 0.158594 | 0.42461  | 0.088517 | 0.504125 | 0.356673 | 0.797037  |
| ENSMUSG Egfr      | 4.065978 | 4.586797 | 3.664351 | 3.479347 | 3.52185  | 3.372691  |
| ENSMUSG Srgap1    | 3.286279 | 2.635221 | 2.710843 | 1.818942 | 2.346231 | 1.931568  |
| ENSMUSG Plek      | 15.62414 | 13.70127 | 19.75471 | 21.61994 | 19.27965 | 21.014855 |
| ENSMUSG Elane     | 0.064206 | 0        | 0        | 0        | 0        | 0         |
| ENSMUSG Usp15     | 10.04412 | 9.988594 | 10.75792 | 9.877817 | 8.952891 | 8.218324  |
| ENSMUSG Znhit2    | 12.63231 | 10.31321 | 11.53791 | 11.24408 | 11.83609 | 13.669898 |
| ENSMUSG Lrrc55    | 0.143493 | 0.289143 | 0.087025 | 0.100695 | 0.057212 | 0.117961  |
| ENSMUSG Ccdc162   | 1.634439 | 1.821117 | 1.163274 | 2.314988 | 2.365485 | 2.240643  |
| ENSMUSG Olfr988   | 0        | 0        | 0        | 0        | 0        | 0         |
| ENSMUSG Olfr987   | 0        | 0        | 0        | 0        | 0        | 0         |
| ENSMUSG Olfr993   | 0        | 0        | 0        | 0        | 0.118535 | 0         |
| ENSMUSG Olfr992   | 0        | 0        | 0        | 0        | 0        | 0         |
| ENSMUSG Ccdc58    | 5.342288 | 5.190511 | 4.871117 | 5.520555 | 6.270587 | 4.39772   |
| ENSMUSG 1700001P  | 0.612307 | 0.124387 | 0.353575 | 0.263814 | 0.218406 | 0         |
| ENSMUSG Cwc25     | 9.491606 | 7.812473 | 8.194834 | 7.0911   | 7.446634 | 7.946282  |
| ENSMUSG Pip4k2b   | 11.95071 | 11.02154 | 12.05906 | 11.37611 | 11.89755 | 11.66616  |
| ENSMUSG Trim37    | 5.836003 | 6.676686 | 5.796728 | 6.722197 | 6.725068 | 6.088352  |
| ENSMUSG Marveld1  | 67.13819 | 67.53646 | 69.16799 | 46.06328 | 47.73503 | 47.986324 |
| ENSMUSG Phlpp1    | 17.29456 | 13.73105 | 14.80312 | 7.967052 | 9.091851 | 8.618443  |
| ENSMUSG Snhg11    | 1.997849 | 1.688954 | 2.452029 | 3.096469 | 2.408303 | 2.509385  |
| ENSMUSG Slc25a53  | 1.035569 | 0.908739 | 0.973019 | 1.41306  | 1.52119  | 1.290982  |
| ENSMUSG Nceh1     | 19.04985 | 20.02194 | 18.16905 | 23.22537 | 24.51201 | 25.10033  |
| ENSMUSG Ect2      | 0.890083 | 1.123352 | 0.810865 | 2.018827 | 2.619339 | 2.755498  |
| ENSMUSG Hexim1    | 25.46989 | 27.12951 | 26.27472 | 21.01304 | 22.37723 | 23.042147 |
| ENSMUSG Slc2a2    | 0        | 0.003935 | 0.031852 | 0.02606  | 0        | 0.019447  |
| ENSMUSG Tnik      | 2.477011 | 2.750335 | 2.189345 | 2.233576 | 2.461543 | 1.724358  |
| ENSMUSG Pld1      | 8.764234 | 8.908726 | 7.685948 | 8.010356 | 9.814826 | 9.138515  |
| ENSMUSG Pudp      | 0        | 0        | 0        | 0        | 0        | 0         |
| ENSMUSG Phf3      | 17.61425 | 17.81443 | 14.97346 | 15.56706 | 16.58717 | 15.412424 |
| ENSMUSG Gm10643   | 0.658562 | 0.614399 | 0.389507 | 0.397578 | 0.543977 | 0.663865  |
| ENSMUSG Gm11273   | 6.620153 | 7.346308 | 8.208998 | 11.54285 | 5.920541 | 9.223009  |
| ENSMUSG Nme4      | 1.293128 | 1.463315 | 1.074189 | 0.854816 | 0.603475 | 1.261938  |
| ENSMUSG E130208F1 | 0        | 0        | 0        | 0        | 0        | 0         |
| ENSMUSG Sdhaf1    | 2.761268 | 2.728919 | 2.329721 | 3.101541 | 3.245523 | 3.399975  |
| ENSMUSG Dnajb14   | 6.579751 | 7.073701 | 5.730745 | 6.495749 | 6.705007 | 6.367969  |
| ENSMUSG Gm10642   | 0.089843 | 0.036539 | 0.092245 | 0.063206 | 0.066852 | 0.056372  |
| ENSMUSG Cip2a     | 0.695584 | 0.764078 | 0.78752  | 1.893812 | 2.090613 | 2.430551  |
| ENSMUSG Calhm2    | 8.676736 | 8.175245 | 8.805192 | 7.317008 | 7.248358 | 6.752813  |
| ENSMUSG Afap1l1   | 106.7793 | 103.8049 | 100.375  | 67.72774 | 71.72809 | 67.844551 |
| ENSMUSG Gm7879    | 10.45202 | 11.17895 | 9.809818 | 11.89234 | 9.659211 | 10.272786 |
| ENSMUSG Micall1   | 12.66863 | 12.62777 | 12.42536 | 11.07648 | 11.50758 | 11.462732 |
| ENSMUSG Rela      | 37.31273 | 34.60228 | 38.69123 | 29.73417 | 29.02984 | 30.254799 |
| ENSMUSG Kat5      | 15.3387  | 16.5451  | 16.12215 | 13.59874 | 14.53694 | 14.343011 |
| ENSMUSG Rnaseh2c  | 13.54384 | 15.46956 | 17.63043 | 15.70234 | 15.89286 | 18.624516 |
| ENSMUSG Vldlr     | 8.14663  | 9.087971 | 9.369681 | 7.124993 | 6.959391 | 6.24721   |



|                   |          |          |          |          |          |           |
|-------------------|----------|----------|----------|----------|----------|-----------|
| ENSMUSG Ovol1     | 1.238733 | 1.010406 | 1.216632 | 0.53717  | 0.805738 | 1.03458   |
| ENSMUSG Smarca2   | 72.67182 | 67.19886 | 65.40531 | 46.95694 | 49.45633 | 44.680895 |
| ENSMUSG Gm49416   | 0.052135 | 0.223956 | 0.111145 | 0.594089 | 0.520853 | 1.226723  |
| ENSMUSG Tep1      | 5.282979 | 5.331482 | 4.669391 | 7.403408 | 7.76583  | 7.917069  |
| ENSMUSG Adgrf3    | 0.16722  | 0.268435 | 0.069395 | 0.107419 | 0.13898  | 0.172834  |
| ENSMUSG Gm2696    | 0        | 0        | 0        | 0        | 0        | 0         |
| ENSMUSG Slc14a1   | 0.446094 | 0.250976 | 0.267993 | 0.513204 | 0.261726 | 0.283541  |
| ENSMUSG Zfp36l3   | 0.065695 | 0.044708 | 0.035702 | 0.022243 | 0.070795 | 0.067569  |
| ENSMUSG Olfr354   | 0        | 0        | 0        | 0        | 0        | 0         |
| ENSMUSG Rem1      | 4.967174 | 4.281688 | 4.847137 | 3.993582 | 3.670419 | 4.517602  |
| ENSMUSG Gm17079   | 0        | 0        | 0        | 0        | 0        | 0         |
| ENSMUSG E130218l0 | 0.015582 | 0.063211 | 0.159788 | 0.150064 | 0.073015 | 0.148806  |
| ENSMUSG Serpinb12 | 0        | 0.082225 | 0.111024 | 0.13435  | 0.064994 | 0.126195  |
| ENSMUSG Morc4     | 1.372004 | 1.607348 | 1.389121 | 1.251657 | 0.932343 | 1.026611  |
| ENSMUSG Rbm41     | 4.286309 | 3.837434 | 3.350655 | 3.601996 | 3.391647 | 2.952608  |
| ENSMUSG Spin2-ps6 | 0        | 0        | 0        | 0        | 0        | 0         |
| ENSMUSG Gm11237   | 0        | 0        | 0        | 0        | 0        | 0         |
| ENSMUSG 5430401F1 | 0        | 0        | 0        | 0        | 0        | 0         |
| ENSMUSG 9330182O  | 0        | 0        | 0        | 0.089    | 0        | 0.051228  |
| ENSMUSG C1rb      | 5.906597 | 5.625565 | 5.658968 | 5.785515 | 5.970035 | 6.857227  |
| ENSMUSG Zfp324    | 4.019066 | 3.237396 | 2.99959  | 2.56267  | 3.074437 | 3.0383    |
| ENSMUSG Olfr612   | 0        | 0        | 0        | 0        | 0        | 0         |
| ENSMUSG Fam114a2  | 16.11309 | 17.02354 | 15.71784 | 15.92376 | 15.19389 | 15.783042 |
| ENSMUSG Dusp28    | 6.036897 | 6.672643 | 5.702045 | 5.449195 | 6.125185 | 4.774264  |
| ENSMUSG Gm9817    | 0.058282 | 0.139982 | 0.051937 | 0        | 0.073541 | 0.066404  |
| ENSMUSG Hist2h3c2 | 1.2589   | 1.540831 | 1.461688 | 1.433245 | 1.674798 | 3.140634  |
| Mus_musc Mus_musc | 0.393574 | 0.367751 | 0.399515 | 0.209616 | 0.073822 | 0.531188  |
| Mus_musc Mus_musc | 0.136788 | 0        | 0.087005 | 0.095235 | 0.160734 | 0.309162  |
| Mus_musc Mus_musc | 0.338289 | 0.20632  | 0        | 0.063314 | 0        | 0         |
| Mus_musc Mus_musc | 0        | 0        | 0.326734 | 0.120951 | 0        | 0         |
| ENSMUSG Cbx3      | 32.78889 | 32.13236 | 31.42533 | 29.23773 | 27.90093 | 27.335825 |
| Mus_musc Mus_musc | 0.949966 | 0.991666 | 0.868894 | 0.479283 | 0.435879 | 0.400756  |
| ENSMUSG Nfe2l3    | 2.128022 | 2.30146  | 1.569354 | 2.049189 | 1.98652  | 1.815434  |
| ENSMUSG Kdsr      | 9.357614 | 8.482821 | 9.144074 | 6.946991 | 7.417959 | 6.55964   |
| ENSMUSG Svopl     | 0.063737 | 0.051523 | 0        | 0.130181 | 0.299607 | 0.038612  |
| ENSMUSG Npvf      | 0        | 0        | 0        | 0        | 0        | 0         |
| ENSMUSG Gm2004    | 0.789935 | 0.862415 | 0.640589 | 0.592518 | 0.3586   | 0.750767  |
| ENSMUSG Gm13057   | 0        | 0        | 0        | 0        | 0        | 0         |
| Mus_musc Mus_musc | 0.992048 | 0.433143 | 0.335515 | 0.574523 | 0.618979 | 0.437335  |
| ENSMUSG Olfr1434  | 0        | 0        | 0        | 0        | 0        | 0         |
| ENSMUSG Taar7a    | 0        | 0        | 0        | 0        | 0        | 0         |
| Mus_musc Mus_musc | 3.750229 | 5.331732 | 3.238605 | 2.357012 | 3.029165 | 4.414986  |
| ENSMUSG Olfr1252  | 0        | 0        | 0.045645 | 0        | 0        | 0         |
| Mus_musc Mus_musc | 1.425339 | 1.121806 | 0.869838 | 0.570264 | 1.709212 | 0.943207  |
| Mus_musc Mus_musc | 0        | 0        | 0        | 0        | 0        | 0         |
| Mus_musc Mus_musc | 0.178532 | 0.083689 | 0.285409 | 0.216938 | 0.625846 | 0.529022  |
| Mus_musc Mus_musc | 0        | 0        | 0        | 0        | 0        | 0         |
| Mus_musc Mus_musc | 0        | 0.133603 | 0        | 0        | 0        | 0         |
| ENSMUSG Hfe       | 9.743171 | 8.852024 | 9.830921 | 9.518879 | 10.68524 | 10.548727 |
| Mus_musc Mus_musc | 0        | 0        | 0        | 0        | 0.186692 | 0         |
| Mus_musc Mus_musc | 1.18505  | 1.024269 | 0.883804 | 0.839272 | 0.876018 | 0.904439  |
| ENSMUSG 4931440F1 | 0.032679 | 0.050242 | 0.033075 | 0.039757 | 0.05976  | 0.008326  |
| Mus_musc Mus_musc | 0        | 0        | 0        | 0.174016 | 0        | 0         |
| ENSMUSG Gm12184   | 9.671306 | 8.402397 | 11.75652 | 9.725273 | 7.916117 | 8.550261  |
| ENSMUSG Olfr229   | 0        | 0        | 0        | 0        | 0        | 0         |
| Mus_musc Mus_musc | 2.638276 | 2.097994 | 2.593779 | 2.961344 | 2.966976 | 3.14953   |
| Mus_musc Mus_musc | 0.936884 | 0.436602 | 0.734323 | 0.424497 | 0.243925 | 0.651893  |
| Mus_musc Mus_musc | 0.094536 | 0.03447  | 0.106144 | 6.333409 | 12.29625 | 9.331004  |
| ENSMUSG Lamtor3   | 34.75341 | 35.45332 | 35.16645 | 30.36752 | 32.27625 | 32.368337 |
| Mus_musc Mus_musc | 75.02557 | 84.05142 | 38.92385 | 13957.32 | 18089.11 | 11353.871 |
| Mus_musc Mus_musc | 0        | 0.047195 | 0        | 5.89839  | 58.35581 | 3.75461   |
| Mus_musc Mus_musc | 0.121512 | 0.078633 | 0.094069 | 0        | 0        | 0.12372   |
| Mus_musc Mus_musc | 0.113767 | 0.230816 | 0        | 0.20063  | 0        | 0         |
| Mus_musc Mus_musc | 0        | 0.118248 | 0        | 0.042558 | 0        | 0         |

|          |          |          |          |          |          |          |           |
|----------|----------|----------|----------|----------|----------|----------|-----------|
| Mus_musc | Mus_musc | 2.009546 | 0.95449  | 0.853582 | 1.210738 | 1.086366 | 0.558059  |
| Mus_musc | Mus_musc | 5.769584 | 5.186133 | 5.2327   | 3.103807 | 3.325607 | 2.622416  |
| Mus_musc | Mus_musc | 0        | 0        | 0.372274 | 0        | 0.27291  | 0         |
| Mus_musc | Mus_musc | 0.212574 | 0.054445 | 0.097868 | 0.183803 | 0.355203 | 0.156263  |
| Mus_musc | Mus_musc | 0.234178 | 0.095148 | 0        | 0        | 0.136771 | 0.364324  |
| Mus_musc | Mus_musc | 0        | 0        | 0.101566 | 0.214642 | 0        | 0         |
| Mus_musc | Mus_musc | 0.407745 | 0.524152 | 0.059137 | 0        | 0.143488 | 0.531424  |
| Mus_musc | Mus_musc | 1.690023 | 1.812617 | 0.44617  | 30.83703 | 19.19608 | 48.31852  |
| Mus_musc | Mus_musc | 0        | 0        | 0        | 0.117714 | 0.175949 | 0.270272  |
| ENSMUSG  | Ramp1    | 4.415404 | 4.685689 | 5.014599 | 6.311762 | 6.661464 | 6.636488  |
| ENSMUSG  | Mtmt3    | 26.94636 | 26.43962 | 22.81068 | 22.04818 | 24.09278 | 23.600497 |
| ENSMUSG  | Skint2   | 0        | 0        | 0        | 0        | 0        | 0         |
| ENSMUSG  | 4931422A | 0.307891 | 0.240104 | 0.229614 | 0.153154 | 0.239886 | 0.390454  |
| ENSMUSG  | Clec9a   | 13.92228 | 15.74975 | 16.83355 | 9.441949 | 9.395752 | 8.313467  |
| ENSMUSG  | Tmem174  | 0        | 0        | 0        | 0        | 0        | 0         |
| ENSMUSG  | Vmn1r233 | 0        | 0        | 0        | 0        | 0        | 0         |
| ENSMUSG  | St7l     | 6.961084 | 6.957504 | 6.502782 | 5.635822 | 5.33515  | 5.479404  |
| ENSMUSG  | Penk     | 1.546296 | 2.389265 | 0.801015 | 1.520235 | 1.489148 | 0.802335  |
| ENSMUSG  | Pr15a1   | 0        | 0        | 0        | 0        | 0        | 0         |
| Mus_musc | Mus_musc | 0.312449 | 0.117263 | 0.261548 | 0.293755 | 0.163047 | 0.186623  |
| Mus_musc | Mus_musc | 0        | 0        | 0        | 0        | 0        | 0         |
| Mus_musc | Mus_musc | 0.76118  | 0.543771 | 0.872757 | 0.315071 | 0.34473  | 0.377044  |
| Mus_musc | Mus_musc | 0.188043 | 0        | 0        | 0        | 0        | 0         |
| Mus_musc | Mus_musc | 0        | 0        | 0        | 0        | 0        | 0         |
| Mus_musc | Mus_musc | 0.218831 | 0.23198  | 0        | 0.151231 | 0.597502 | 0.28599   |
| Mus_musc | Mus_musc | 0.410047 | 1.009792 | 0.2748   | 0.71935  | 0.972622 | 0.857004  |
| Mus_musc | Mus_musc | 0.332669 | 0.611606 | 0.55143  | 0.234875 | 0.467872 | 0.482706  |
| Mus_musc | Mus_musc | 1.198872 | 0.657228 | 0.685445 | 0.713437 | 0.812661 | 0.749333  |
| Mus_musc | Mus_musc | 0.960707 | 2.396853 | 1.940458 | 1.059787 | 0.927851 | 1.387436  |
| Mus_musc | Mus_musc | 2.44613  | 2.742516 | 2.295955 | 2.304203 | 2.176219 | 2.278198  |
| Mus_musc | Mus_musc | 2.375708 | 2.321414 | 2.124512 | 2.31558  | 2.452364 | 2.372141  |
| Mus_musc | Mus_musc | 0        | 0        | 0        | 0.174016 | 0        | 0         |
| Mus_musc | Mus_musc | 0.188238 | 0        | 0        | 0        | 0        | 0.091793  |
| Mus_musc | Mus_musc | 0.175755 | 0.235655 | 0.481683 | 1.067381 | 1.598999 | 2.191627  |
| Mus_musc | Mus_musc | 0.891107 | 0.157435 | 0        | 0.269102 | 0.355759 | 0.220151  |
| Mus_musc | Mus_musc | 0        | 0        | 0        | 0.085759 | 0.173699 | 0         |
| Mus_musc | Mus_musc | 0.438927 | 0.241691 | 0.168366 | 0.299045 | 0.08878  | 0.423807  |
| Mus_musc | Mus_musc | 0.196051 | 0.161252 | 0        | 0.16258  | 0        | 0         |
| ENSMUSG  | Zfp40    | 2.539569 | 2.148457 | 2.370772 | 1.847611 | 1.951078 | 1.623737  |
| ENSMUSG  | Grm6     | 0.08379  | 0        | 0.077523 | 0.079733 | 0.26788  | 0.235529  |
| ENSMUSG  | Liph     | 9.237068 | 12.12829 | 8.78347  | 9.368579 | 9.968272 | 8.616469  |
| ENSMUSG  | Swi5     | 81.86013 | 87.54204 | 86.95086 | 86.31932 | 84.43605 | 88.735623 |
| ENSMUSG  | Gm4922   | 0        | 0        | 0        | 0.01735  | 0        | 0         |
| ENSMUSG  | Rnf208   | 1.831862 | 1.461763 | 0.666836 | 1.178939 | 0.92655  | 1.111564  |
| ENSMUSG  | Cnrip1   | 4.330859 | 4.900484 | 4.518443 | 3.815409 | 4.276228 | 5.254556  |
| ENSMUSG  | Wwp1     | 28.71314 | 29.30689 | 24.85248 | 20.43654 | 20.50071 | 19.434664 |
| ENSMUSG  | Slc7a13  | 0        | 0.02155  | 0.023356 | 0        | 0        | 0         |
| ENSMUSG  | Pbld1    | 0.648224 | 0.81112  | 0.504605 | 1.528682 | 0.941396 | 1.192052  |
| ENSMUSG  | Wdr43    | 10.68504 | 10.7616  | 10.52485 | 10.19103 | 9.805846 | 9.934926  |
| ENSMUSG  | Hyal2    | 64.41932 | 60.24039 | 72.25959 | 47.50451 | 43.6742  | 44.577105 |
| ENSMUSG  | Tmem115  | 19.2206  | 20.21473 | 18.56334 | 17.17271 | 16.17161 | 17.567371 |
| ENSMUSG  | Zmynd10  | 4.122416 | 4.657167 | 3.42414  | 5.506009 | 5.242564 | 4.842168  |
| ENSMUSG  | lfrd2    | 9.254985 | 7.937099 | 8.558031 | 7.145008 | 8.198202 | 9.109473  |
| ENSMUSG  | Xlr3c    | 0.075497 | 0        | 0        | 0.033232 | 0.040073 | 0.025233  |
| ENSMUSG  | Adamts17 | 0.468086 | 0.485584 | 0.518051 | 0.875976 | 0.55704  | 0.628092  |
| ENSMUSG  | Tex261   | 26.04692 | 24.45329 | 26.78326 | 22.34289 | 22.18392 | 23.366718 |
| ENSMUSG  | Ankrd53  | 0        | 0.039753 | 0        | 0.013915 | 0        | 0.031775  |
| ENSMUSG  | Pde6b    | 0.007121 | 0        | 0        | 0        | 0        | 0.013556  |
| Mus_musc | Mus_musc | 0.188031 | 0.478326 | 1.47511  | 0.379773 | 0.112376 | 0.777258  |
| Mus_musc | Mus_musc | 0.60368  | 0.453741 | 0.423434 | 0.295782 | 0.542197 | 0.417637  |
| Mus_musc | Mus_musc | 0        | 0        | 0        | 0.295656 | 0        | 0         |
| ENSMUSG  | Fam81b   | 0.896181 | 1.135962 | 0.8112   | 1.308683 | 1.446324 | 1.179726  |
| ENSMUSG  | Cypt2    | 0        | 0        | 0        | 0        | 0        | 0         |
| ENSMUSG  | Kbtbd11  | 7.560698 | 7.391117 | 7.527205 | 8.386156 | 7.436375 | 8.089787  |

|                   |          |          |          |          |          |           |
|-------------------|----------|----------|----------|----------|----------|-----------|
| ENSMUSG Uba52     | 364.383  | 359.885  | 401.4439 | 435.9641 | 410.2291 | 419.45355 |
| ENSMUSG Zzef1     | 8.460995 | 8.260912 | 7.418307 | 7.913673 | 8.783775 | 9.374868  |
| ENSMUSG Ctsr      | 0        | 0        | 0        | 0        | 0        | 0         |
| ENSMUSG Cox15     | 5.806864 | 5.226997 | 5.14245  | 4.812471 | 5.391368 | 5.569482  |
| ENSMUSG Saa4      | 0        | 0        | 0        | 0.122991 | 0.082647 | 0.066673  |
| ENSMUSG Ptger3    | 0.500879 | 1.433996 | 0.545908 | 0.744195 | 0.539361 | 1.076747  |
| ENSMUSG Slc7a5    | 2.456367 | 1.960711 | 2.1949   | 5.156657 | 6.486059 | 6.854666  |
| ENSMUSG Fkbp6     | 0        | 0        | 0        | 0        | 0        | 0         |
| ENSMUSG Zscan20   | 1.232752 | 1.517668 | 1.304121 | 1.286307 | 1.217276 | 1.321892  |
| ENSMUSG Rbak      | 3.660598 | 4.193098 | 3.767005 | 3.25034  | 3.51556  | 3.239784  |
| ENSMUSG St3gal5   | 12.62431 | 13.74209 | 13.46474 | 12.13657 | 12.38853 | 13.626654 |
| ENSMUSG Trim43c   | 0.146362 | 0.081691 | 0.140756 | 0.159937 | 0.139503 | 0.193997  |
| ENSMUSG 2010106E1 | 0        | 0        | 0        | 0        | 0        | 0         |
| ENSMUSG Zfp711    | 0.517956 | 0.737465 | 0.315673 | 0.475417 | 0.274108 | 0.333666  |
| ENSMUSG Klra6     | 0        | 0        | 0        | 0        | 0        | 0         |
| ENSMUSG Tmem192   | 9.749198 | 7.115761 | 9.095391 | 11.77524 | 11.83759 | 11.303283 |
| ENSMUSG Sap30l    | 14.5204  | 13.06293 | 13.37223 | 11.13877 | 12.55015 | 11.64766  |
| ENSMUSG Tac1      | 0        | 0        | 0        | 0.042443 | 0        | 0         |
| ENSMUSG Apool     | 7.144689 | 7.545262 | 8.431562 | 10.6311  | 8.27326  | 9.906241  |
| ENSMUSG Satl1     | 0        | 0        | 0.081456 | 0        | 0        | 0         |
| ENSMUSG Gm17469   | 0        | 0        | 0        | 0        | 0        | 0         |
| ENSMUSG Olfr969   | 0        | 0        | 0        | 0        | 0        | 0         |
| ENSMUSG Gm8159    | 0        | 0        | 0        | 0        | 0        | 0         |
| ENSMUSG Myh1      | 0        | 0.020047 | 0.012613 | 0        | 0        | 0.051552  |
| Mus_musc Mus_musc | 0        | 0.469795 | 0        | 0        | 0        | 0         |
| Mus_musc Mus_musc | 0        | 0        | 0        | 0        | 0        | 0         |
| Mus_musc Mus_musc | 0        | 0        | 0        | 0        | 0.454555 | 0         |
| Mus_musc Mus_musc | 0.503679 | 0.362164 | 0.211938 | 0        | 0.152324 | 0.163256  |
| Mus_musc Mus_musc | 0.108052 | 0.195603 | 0        | 0.05343  | 0        | 0.07575   |
| Mus_musc Mus_musc | 0.983994 | 1.25427  | 1.166633 | 0.405002 | 0.922395 | 0.24439   |
| ENSMUSG Cltb      | 48.3313  | 52.91755 | 53.91837 | 36.86224 | 38.90014 | 37.187272 |
| ENSMUSG Olfr616   | 0        | 0        | 0        | 0        | 0        | 0         |
| ENSMUSG Olfr629   | 0        | 0        | 0        | 0        | 0        | 0         |
| ENSMUSG Il7r      | 4.612427 | 3.148597 | 3.426588 | 16.69931 | 15.22576 | 16.980269 |
| ENSMUSG Ehf       | 6.729288 | 8.645061 | 5.218361 | 12.72993 | 12.56077 | 11.98747  |
| ENSMUSG Mageb18   | 0        | 0        | 0        | 0        | 0        | 0         |
| ENSMUSG Sec61b    | 50.58202 | 60.77651 | 72.28183 | 111.9994 | 102.747  | 101.85864 |
| ENSMUSG Nrgn      | 12.60458 | 10.33086 | 19.85076 | 4.915448 | 5.646897 | 4.596418  |
| ENSMUSG Slamf8    | 0.915676 | 0.681881 | 2.165315 | 8.039042 | 6.602708 | 9.234459  |
| ENSMUSG Hace1     | 5.986865 | 6.22234  | 4.876799 | 4.792519 | 5.178497 | 4.53731   |
| ENSMUSG Fam206a   | 4.00748  | 4.083512 | 3.221497 | 3.645034 | 3.738025 | 3.857086  |
| ENSMUSG Tmem214   | 10.15364 | 9.633595 | 10.33628 | 11.44469 | 12.17304 | 12.794956 |
| ENSMUSG Pex7      | 1.974603 | 2.089887 | 1.491849 | 2.077777 | 1.663081 | 2.309314  |
| ENSMUSG Abi3      | 15.34066 | 15.00826 | 17.37147 | 12.17536 | 9.771058 | 11.819046 |
| ENSMUSG Shroom1   | 1.235159 | 1.238371 | 1.337414 | 0.837884 | 0.779238 | 1.085697  |
| ENSMUSG Rnf213    | 12.36613 | 11.13504 | 14.24218 | 13.04986 | 12.12057 | 12.506027 |
| ENSMUSG Kik1b3    | 0        | 0        | 0        | 0        | 0        | 0         |
| ENSMUSG Kik1b21   | 0        | 0        | 0        | 0        | 0        | 0         |
| ENSMUSG Ankdd1a   | 0        | 0        | 0        | 0.211637 | 0        | 0.085466  |
| ENSMUSG Icam4     | 1.126262 | 0.524972 | 0.803047 | 0.524557 | 0.908582 | 0.960966  |
| ENSMUSG Kik1b5    | 0        | 0        | 0        | 0        | 0        | 0         |
| ENSMUSG Kik1b4    | 0        | 0        | 0        | 0        | 0        | 0         |
| ENSMUSG Olfr458   | 0        | 0        | 0        | 0        | 0        | 0         |
| ENSMUSG Gm36210   | 0.354452 | 0.213065 | 0.073175 | 0.101906 | 0.283031 | 0.154953  |
| ENSMUSG Ifngr1    | 67.02464 | 62.39078 | 69.95392 | 53.63278 | 60.32433 | 50.928887 |
| ENSMUSG Gm42416   | 0        | 0        | 0        | 0        | 0        | 0         |
| ENSMUSG Moxd1     | 0.068397 | 0.231014 | 0.123395 | 0.801432 | 1.186433 | 0.963252  |
| ENSMUSG Mmp27     | 0.153638 | 0.521328 | 0.339194 | 0.208069 | 0.182787 | 0.357606  |
| ENSMUSG Fbxw22    | 0        | 0        | 0        | 0        | 0        | 0         |
| ENSMUSG Il20ra    | 0.094328 | 0.072793 | 0        | 0        | 0.021729 | 0.106224  |
| ENSMUSG Ets2      | 73.17852 | 66.49495 | 68.00956 | 33.74345 | 36.01848 | 34.020484 |
| ENSMUSG Adamts5   | 2.089116 | 2.601314 | 1.523243 | 1.886763 | 1.750593 | 1.861542  |
| ENSMUSG Dyrk1a    | 12.71105 | 11.89059 | 12.47518 | 9.512424 | 10.18843 | 9.806875  |
| ENSMUSG Atp5j     | 72.83671 | 75.63944 | 73.36233 | 75.79018 | 74.30174 | 74.899819 |

|                   |          |          |          |          |          |           |
|-------------------|----------|----------|----------|----------|----------|-----------|
| ENSMUSG Adamts1   | 28.6393  | 24.81782 | 30.40453 | 10.97595 | 14.05193 | 14.174916 |
| ENSMUSG App       | 328.0264 | 444.4768 | 416.1259 | 314.4638 | 338.2782 | 308.85951 |
| Mus_musc Mus_musc | 0        | 0.213058 | 0        | 0        | 0        | 0.255642  |
| ENSMUSG Slc15a2   | 8.902326 | 12.36756 | 9.181405 | 11.58058 | 10.94188 | 10.963778 |
| ENSMUSG Vps26c    | 16.81745 | 17.1726  | 17.80376 | 18.49842 | 19.01818 | 19.417378 |
| Mus_musc Mus_musc | 0        | 0.404679 | 0.103674 | 0.21051  | 0.210183 | 0.187439  |
| ENSMUSG Gas1      | 8.05526  | 5.894337 | 5.897119 | 5.587388 | 5.508418 | 7.049545  |
| ENSMUSG Slc7a11   | 0.44384  | 0.352905 | 0.217226 | 3.508181 | 3.534457 | 3.823803  |
| ENSMUSG Cpv1      | 0        | 0        | 0        | 0        | 0        | 0         |
| ENSMUSG Clint1    | 32.3454  | 29.5576  | 30.55248 | 37.51496 | 37.37633 | 38.701149 |
| ENSMUSG Tmem184c  | 10.07574 | 10.73809 | 8.286998 | 8.860621 | 7.579159 | 7.921175  |
| ENSMUSG Cc2d1a    | 10.11971 | 10.13773 | 10.04608 | 9.793352 | 10.1384  | 9.981133  |
| ENSMUSG Lrrc17    | 2.495366 | 1.757451 | 2.16291  | 1.661263 | 1.254513 | 1.439212  |
| ENSMUSG Tmem120c  | 7.532203 | 9.037535 | 9.492933 | 8.187448 | 9.289591 | 9.137362  |
| ENSMUSG Alg14     | 6.839747 | 8.125234 | 7.313415 | 6.868758 | 7.522136 | 7.13514   |
| ENSMUSG Vmn2r8    | 0.03401  | 0.053372 | 0.035039 | 0.032198 | 0.029772 | 0.031895  |
| ENSMUSG Gm17655   | 1.629099 | 1.445419 | 1.806653 | 1.789795 | 1.676259 | 1.557372  |
| ENSMUSG Vmn2r116  | 0        | 0        | 0        | 0        | 0        | 0         |
| ENSMUSG Vmn2r61   | 0        | 0        | 0        | 0        | 0        | 0         |
| ENSMUSG Crym      | 6.576138 | 7.719089 | 8.818821 | 4.411177 | 4.690054 | 6.265396  |
| ENSMUSG Gm38100   | 0        | 0        | 0        | 0        | 0        | 0         |
| ENSMUSG Cdc42ep3  | 21.78367 | 22.16124 | 21.42025 | 14.27839 | 11.83662 | 12.380636 |
| ENSMUSG Rnf113a1  | 1.621252 | 1.891582 | 2.543988 | 1.95786  | 2.151923 | 2.264602  |
| ENSMUSG Olfr787   | 0        | 0        | 0        | 0        | 0        | 0         |
| ENSMUSG Slc38a7   | 6.615954 | 6.147201 | 5.746174 | 6.110959 | 6.63202  | 6.883554  |
| ENSMUSG Tas2r109  | 0        | 0        | 0        | 0        | 0        | 0         |
| ENSMUSG Ncr1      | 3.641773 | 2.860742 | 20.15712 | 6.978349 | 1.452076 | 2.490614  |
| ENSMUSG Asxl2     | 7.362748 | 7.202675 | 5.977974 | 7.296382 | 6.490068 | 7.687311  |
| ENSMUSG Ubr5      | 23.81728 | 24.88859 | 21.06965 | 20.86148 | 21.04956 | 21.38129  |
| ENSMUSG Safb      | 36.61225 | 37.84117 | 38.18952 | 29.44983 | 30.38466 | 31.635044 |
| ENSMUSG Erv3      | 0        | 0        | 0        | 0.038636 | 0.061347 | 0         |
| ENSMUSG Gm10337   | 0        | 0        | 0        | 0        | 0        | 0.025534  |
| ENSMUSG Nat3      | 0        | 0        | 0        | 0        | 0        | 0         |
| ENSMUSG Gm17657   | 0        | 0        | 0        | 0        | 0        | 0         |
| ENSMUSG Gm3752    | 0        | 0.075371 | 0        | 0        | 0        | 0         |
| ENSMUSG Gm3625    | 0.021486 | 0        | 0        | 0        | 0        | 0         |
| ENSMUSG H60c      | 0.046924 | 0        | 0        | 0        | 0        | 0         |
| ENSMUSG Iba57     | 1.598162 | 1.373364 | 1.72308  | 1.649107 | 1.891695 | 1.849731  |
| ENSMUSG Capn8     | 0.107684 | 0.115841 | 0.102034 | 0.122655 | 0.169249 | 0.122165  |
| ENSMUSG Al481877  | 0.015642 | 0.011348 | 0        | 0.007388 | 0        | 0         |
| ENSMUSG Scn3b     | 44.57913 | 39.32544 | 33.68584 | 18.49471 | 20.97227 | 22.389658 |
| ENSMUSG Olfr509   | 0        | 0        | 0        | 0        | 0        | 0         |
| ENSMUSG Tctn1     | 4.727471 | 4.269646 | 4.940732 | 3.865589 | 4.648176 | 4.834754  |
| ENSMUSG Eno3      | 6.813065 | 11.2826  | 8.387359 | 6.95605  | 6.000164 | 5.435986  |
| ENSMUSG Nr1h2     | 55.65227 | 53.42517 | 56.0352  | 46.15309 | 44.29444 | 46.365515 |
| ENSMUSG Cep85l    | 8.236068 | 9.630094 | 7.995515 | 4.879173 | 5.376714 | 4.677624  |
| ENSMUSG Cidec     | 10.96969 | 16.41095 | 9.600816 | 4.715004 | 2.464558 | 3.573617  |
| ENSMUSG C2cd5     | 4.709892 | 5.725186 | 5.585589 | 7.008874 | 6.530136 | 5.75962   |
| ENSMUSG Ttll3     | 2.921214 | 2.462402 | 2.407039 | 3.191169 | 2.832345 | 2.63783   |
| ENSMUSG Etnk1     | 30.19914 | 29.94509 | 30.75065 | 31.4943  | 29.72205 | 31.417269 |
| ENSMUSG Camk1     | 46.75331 | 45.7883  | 48.08514 | 43.7359  | 44.49413 | 45.886356 |
| ENSMUSG Cpne9     | 0.018282 | 0        | 0        | 0        | 0        | 0         |
| ENSMUSG Ogg1      | 5.924084 | 5.770376 | 5.102945 | 5.935359 | 4.306863 | 4.744391  |
| ENSMUSG Csnk1g3   | 7.93654  | 8.80058  | 8.07828  | 7.53309  | 7.481092 | 6.931915  |
| ENSMUSG Prr16     | 0.873196 | 0.78799  | 0.606393 | 0.869063 | 0.962003 | 0.793144  |
| ENSMUSG Arl14ep1  | 0        | 0.061532 | 0.064221 | 0.093909 | 0.111668 | 0.07214   |
| ENSMUSG Cntnap5c  | 0        | 0        | 0        | 0        | 0        | 0         |
| ENSMUSG Sult6b1   | 0.105973 | 0        | 0.055601 | 0.035986 | 0.074043 | 0.156737  |
| ENSMUSG Uts2b     | 0        | 0        | 0.050984 | 0        | 0        | 0         |
| ENSMUSG Haus6     | 2.306087 | 2.279319 | 2.169532 | 2.089748 | 2.010429 | 1.836838  |
| ENSMUSG Mrm3      | 2.396467 | 2.315763 | 2.81743  | 2.29056  | 1.998968 | 2.851716  |
| ENSMUSG Ptpdc1    | 2.625736 | 2.365363 | 2.273884 | 1.694622 | 1.415007 | 1.762186  |
| Mus_musc Mus_musc | 0.334215 | 0.454342 | 0.413576 | 0.467619 | 0.464064 | 0         |
| ENSMUSG Akt1s1    | 29.78983 | 29.08187 | 30.77066 | 30.66751 | 30.2549  | 31.834805 |

|                   |          |          |          |          |          |           |
|-------------------|----------|----------|----------|----------|----------|-----------|
| ENSMUSG Osr2      | 0.063586 | 0.200413 | 0.024106 | 0.122033 | 0.306786 | 0.180181  |
| ENSMUSG Khdrbs3   | 4.884342 | 4.739878 | 4.739983 | 5.336646 | 4.152975 | 4.993343  |
| ENSMUSG Zfat      | 1.433046 | 1.500989 | 1.426417 | 1.455635 | 1.505519 | 1.843336  |
| ENSMUSG Eif3e     | 63.3141  | 67.84631 | 61.66383 | 69.57568 | 68.52186 | 67.282272 |
| ENSMUSG Emc2      | 23.91352 | 23.44231 | 25.83341 | 27.34711 | 24.5094  | 25.330399 |
| ENSMUSG Eny2      | 17.85043 | 17.33048 | 16.80315 | 15.02835 | 15.45701 | 13.940127 |
| ENSMUSG Ebag9     | 8.92308  | 8.803195 | 8.418425 | 8.881208 | 8.56141  | 7.548312  |
| Mus_musc Mus_musc | 4.03599  | 3.379828 | 5.066162 | 3.839058 | 2.740676 | 3.151437  |
| ENSMUSG Zfp114    | 0.169042 | 0.24432  | 0.206538 | 0.217549 | 0.203977 | 0.057931  |
| ENSMUSG Zbtb34    | 5.451429 | 5.648223 | 5.625112 | 3.828213 | 3.896587 | 3.950992  |
| ENSMUSG Smok3c    | 0        | 0        | 0        | 0        | 0        | 0         |
| ENSMUSG Smok3a    | 0        | 0        | 0        | 0        | 0        | 0         |
| ENSMUSG Nrpb2     | 34.51578 | 32.26647 | 36.26312 | 27.75395 | 24.9465  | 23.448043 |
| ENSMUSG Nynrin    | 6.772888 | 5.436336 | 4.867785 | 4.147821 | 4.054476 | 4.047782  |
| ENSMUSG Gal3st4   | 0        | 0.264731 | 0.076442 | 0        | 0.00946  | 0.238878  |
| ENSMUSG Zfp652    | 16.48198 | 17.48647 | 15.41011 | 14.28387 | 13.47749 | 12.747721 |
| ENSMUSG B130006D  | 0.099854 | 0.014818 | 0        | 0.016711 | 0.044522 | 0         |
| ENSMUSG Ppp1r18   | 23.851   | 22.13658 | 28.48662 | 30.54772 | 30.44301 | 29.923328 |
| ENSMUSG Myo5a     | 4.706715 | 4.201586 | 4.260771 | 17.25602 | 15.40599 | 18.590979 |
| ENSMUSG Rbm20     | 0.240145 | 0.708651 | 0.208761 | 0.236632 | 0.167746 | 0.223052  |
| ENSMUSG Slc41a2   | 2.047251 | 1.876204 | 1.575271 | 3.874575 | 4.192349 | 4.455621  |
| ENSMUSG Klf17     | 0        | 0        | 0        | 0        | 0        | 0         |
| ENSMUSG Adamts3   | 0.69166  | 0.48769  | 0.272742 | 0.346307 | 0.298851 | 0.260807  |
| ENSMUSG Ecm2      | 8.191917 | 8.975706 | 8.146941 | 4.71576  | 4.1443   | 3.865529  |
| ENSMUSG Olfr1336  | 0        | 0        | 0        | 0        | 0        | 0         |
| ENSMUSG Gm6377    | 0.669858 | 0.591767 | 0.491698 | 0.40286  | 0.412354 | 0.387892  |
| ENSMUSG Minar1    | 0        | 0        | 0        | 0        | 0.009047 | 0         |
| ENSMUSG Rftn1     | 6.685407 | 5.538244 | 6.657045 | 13.9813  | 14.29328 | 16.678799 |
| ENSMUSG Clnk      | 0.255612 | 0.272946 | 0.470288 | 0.455769 | 0.348566 | 0.475742  |
| ENSMUSG Rab3gap2  | 7.904719 | 7.618966 | 7.588573 | 7.230588 | 7.777542 | 8.098975  |
| ENSMUSG Akr1b8    | 7.62125  | 8.464257 | 7.2367   | 8.772887 | 8.298874 | 9.004375  |
| ENSMUSG Exoc4     | 11.6602  | 11.72411 | 10.04163 | 11.70835 | 12.02778 | 12.559972 |
| ENSMUSG Cald1     | 45.5691  | 42.35925 | 43.03879 | 42.37523 | 43.9963  | 40.682966 |
| ENSMUSG 1700012A  | 0        | 0        | 0        | 0        | 0        | 0         |
| ENSMUSG Calu      | 82.667   | 82.82815 | 85.33039 | 83.47471 | 86.16732 | 85.293545 |
| ENSMUSG Plxna4    | 6.340002 | 5.896683 | 5.224171 | 3.890938 | 3.852779 | 3.898683  |
| ENSMUSG Ccdc136   | 0.817478 | 0.944381 | 0.570603 | 1.139969 | 1.169259 | 1.116841  |
| ENSMUSG Fxyd4     | 0.181915 | 0.102999 | 0.085401 | 3.503049 | 7.061703 | 4.866005  |
| ENSMUSG Hnrnpa2b  | 220.3921 | 237.2613 | 268.0654 | 229.1516 | 236.2537 | 223.05054 |
| ENSMUSG Ccdc51    | 2.273843 | 2.362824 | 2.101932 | 2.001777 | 2.420317 | 2.687348  |
| ENSMUSG Shisa5    | 126.1604 | 106.172  | 133.2325 | 119.6465 | 117.8738 | 123.24167 |
| ENSMUSG Atrip     | 4.442868 | 5.128739 | 5.602093 | 4.29473  | 4.201471 | 3.760738  |
| ENSMUSG Pfkfb4    | 12.52573 | 13.28026 | 13.70265 | 13.67497 | 13.99832 | 14.523751 |
| ENSMUSG Zmynd11   | 47.61306 | 48.90404 | 46.55807 | 37.71683 | 36.37962 | 34.054502 |
| ENSMUSG Ifitm10   | 13.10599 | 10.74198 | 16.25806 | 9.518441 | 7.281701 | 7.12828   |
| ENSMUSG Lrtm1     | 0.020892 | 0.114641 | 0        | 0.012479 | 0.014944 | 0.03019   |
| ENSMUSG Slc16a5   | 0.250016 | 0.276677 | 0.332982 | 1.151183 | 0.745245 | 0.836637  |
| ENSMUSG Anks4b    | 0        | 0        | 0.022611 | 0        | 0        | 0         |
| ENSMUSG Ift43     | 37.81199 | 38.30078 | 36.21412 | 31.54925 | 26.50555 | 25.323946 |
| ENSMUSG Fos       | 136.4773 | 20.50721 | 32.72461 | 10.38711 | 14.64649 | 14.447263 |
| ENSMUSG Xdh       | 132.689  | 120.1328 | 204.949  | 95.20261 | 77.45678 | 71.43344  |
| ENSMUSG Dpy30     | 23.9924  | 27.99225 | 25.83948 | 29.68109 | 25.72292 | 26.149967 |
| ENSMUSG Tmigd3    | 0.668257 | 0.710048 | 0.679172 | 1.032175 | 0.780187 | 1.066874  |
| ENSMUSG Tnfaip8l3 | 1.656795 | 2.57237  | 2.09246  | 1.123734 | 1.51669  | 1.451319  |
| ENSMUSG I830077J0 | 1.785325 | 1.325908 | 2.777712 | 1.662159 | 1.576865 | 1.408533  |
| ENSMUSG Lbh       | 69.96271 | 67.57499 | 85.85273 | 78.15974 | 70.82847 | 71.780458 |
| ENSMUSG Ovgp1     | 0.305532 | 0.430925 | 0.309523 | 0.241334 | 0.203535 | 0.391715  |
| ENSMUSG Vash1     | 9.431765 | 9.233923 | 7.001945 | 7.78282  | 7.517618 | 6.475575  |
| ENSMUSG Spast     | 7.730135 | 7.439813 | 6.750311 | 7.307768 | 6.943924 | 7.755156  |
| ENSMUSG Slc30a6   | 5.891417 | 5.478052 | 5.468996 | 6.350047 | 6.364227 | 5.971624  |
| ENSMUSG Mas1      | 0        | 0.049873 | 0.042709 | 0.03805  | 0        | 0         |
| ENSMUSG Afdn      | 38.6251  | 43.2997  | 30.54055 | 30.32335 | 31.77064 | 28.8672   |
| ENSMUSG Tcp1      | 50.48966 | 56.14871 | 52.38594 | 53.09354 | 54.03716 | 57.627699 |
| ENSMUSG Pelo      | 8.503533 | 8.334097 | 9.927149 | 8.010343 | 7.510101 | 7.773723  |

|                   |          |          |          |          |          |           |
|-------------------|----------|----------|----------|----------|----------|-----------|
| ENSMUSG Sestd1    | 6.31608  | 5.396677 | 5.013253 | 5.336282 | 6.759146 | 5.964435  |
| ENSMUSG Nxt2      | 10.60023 | 11.60027 | 9.238964 | 7.898121 | 7.467055 | 7.731863  |
| ENSMUSG Prom1     | 4.151853 | 6.210968 | 2.424948 | 12.00803 | 9.428055 | 9.679962  |
| ENSMUSG H1foo     | 0        | 0        | 0        | 0.02435  | 0        | 0         |
| ENSMUSG Cd38      | 13.13362 | 11.20967 | 10.35481 | 13.84238 | 12.46271 | 13.171317 |
| ENSMUSG Kcnp4     | 1.52968  | 1.302917 | 1.267249 | 0.698818 | 0.594895 | 0.511845  |
| ENSMUSG Gif       | 0.066311 | 0.057112 | 0.090678 | 0.13419  | 0.195322 | 0.194133  |
| ENSMUSG Mrpl16    | 9.738587 | 7.660008 | 8.709321 | 9.152755 | 10.19031 | 9.192703  |
| ENSMUSG Ms4a2     | 0.341748 | 0.170388 | 0.598135 | 0.357049 | 0.09792  | 0.092287  |
| ENSMUSG Ms4a3     | 0        | 0        | 0        | 0        | 0        | 0         |
| ENSMUSG Olfr1275  | 0        | 0        | 0        | 0        | 0        | 0         |
| ENSMUSG Osbp      | 22.67857 | 23.82897 | 22.89919 | 21.33929 | 21.04347 | 20.776274 |
| ENSMUSG Olfr1277  | 0        | 0        | 0        | 0        | 0        | 0         |
| ENSMUSG Ano3      | 0.121765 | 0.140479 | 0.184649 | 0.098233 | 0.050369 | 0.041535  |
| ENSMUSG Sulf2     | 10.63329 | 12.75362 | 11.32433 | 20.5503  | 18.71491 | 23.040385 |
| ENSMUSG Nup214    | 9.106172 | 8.11447  | 7.025372 | 7.951268 | 7.781485 | 7.856009  |
| ENSMUSG Spop      | 95.7632  | 96.90792 | 94.34638 | 84.70351 | 82.61404 | 72.568681 |
| Mus_musc Mus_musc | 0.259801 | 0.18752  | 0.126551 | 0.398313 | 0.485933 | 0.344172  |
| Mus_musc Mus_musc | 0        | 0.246813 | 0.216884 | 0.24233  | 0        | 0.097223  |
| Mus_musc Mus_musc | 0.188031 | 0        | 0        | 0        | 0        | 0         |
| ENSMUSG Prune2    | 0.727597 | 0.881305 | 0.602351 | 1.910868 | 2.6467   | 2.354266  |
| Mus_musc Mus_musc | 0        | 0.208926 | 0.190608 | 0.617798 | 0        | 0.093659  |
| ENSMUSG Ube2m     | 21.64196 | 19.71671 | 23.40961 | 20.44084 | 21.63028 | 22.078845 |
| ENSMUSG Ppp1r14c  | 34.90487 | 34.64042 | 28.99857 | 36.11727 | 35.85493 | 41.093852 |
| ENSMUSG Oaz2      | 153.5914 | 138.6438 | 151.2411 | 136.6019 | 123.7615 | 134.04841 |
| ENSMUSG Fam208a   | 10.84096 | 11.80416 | 9.987876 | 9.701137 | 9.160601 | 8.252322  |
| ENSMUSG Cyp2b23   | 0        | 0        | 0        | 0        | 0        | 0         |
| ENSMUSG Med19     | 12.38486 | 12.04934 | 12.11453 | 10.04011 | 11.19177 | 11.950408 |
| ENSMUSG Olfr672   | 0        | 0        | 0        | 0        | 0        | 0         |
| ENSMUSG Tfpi      | 11.97035 | 12.00834 | 13.89935 | 8.410234 | 8.966406 | 8.793901  |
| ENSMUSG Zfp42     | 0        | 0        | 0        | 0        | 0        | 0         |
| ENSMUSG Fastkd1   | 2.824147 | 2.249334 | 2.657955 | 2.611246 | 3.000012 | 2.74151   |
| ENSMUSG Lmx1a     | 0        | 0        | 0        | 0        | 0        | 0         |
| ENSMUSG Aldh9a1   | 19.16843 | 18.25974 | 17.45379 | 17.90056 | 20.8078  | 18.70439  |
| ENSMUSG Nuf2      | 0.579731 | 0.58798  | 0.673395 | 1.884824 | 2.476137 | 2.500093  |
| ENSMUSG Mgst3     | 27.32975 | 26.77926 | 30.70613 | 20.218   | 19.9788  | 24.120338 |
| ENSMUSG Gm27235   | 0        | 0        | 0        | 0        | 0        | 0         |
| ENSMUSG Them7     | 0        | 0        | 0        | 0.02438  | 0.06887  | 0         |
| ENSMUSG Gm21885   | 0.154307 | 0        | 0        | 0        | 0        | 0         |
| ENSMUSG Pgbd1     | 0.893994 | 1.074605 | 0.812214 | 1.103571 | 1.07637  | 1.075427  |
| ENSMUSG Vmn2r44   | 0        | 0        | 0        | 0        | 0        | 0         |
| ENSMUSG Mapre2    | 43.51433 | 41.11071 | 38.90421 | 30.74769 | 33.5338  | 30.14227  |
| ENSMUSG F2rl3     | 0.299175 | 0.316109 | 0.396339 | 0.189321 | 0.434691 | 0.562131  |
| Mus_musc Mus_musc | 0        | 0.15446  | 0        | 0        | 0        | 0         |
| Mus_musc Mus_musc | 0        | 0.047222 | 0        | 0.46749  | 0.282875 | 0.113756  |
| Mus_musc Mus_musc | 0.414469 | 0.326386 | 0.224515 | 0.978777 | 1.139576 | 1.248187  |
| Mus_musc Mus_musc | 1.837278 | 2.566829 | 1.793473 | 1.085491 | 1.071561 | 1.817389  |
| ENSMUSG Kir3dl2   | 0        | 0        | 0        | 0        | 0        | 0         |
| ENSMUSG Dars      | 23.3653  | 20.32186 | 19.56465 | 20.9834  | 17.59707 | 20.982093 |
| ENSMUSG Rgs18     | 2.287114 | 1.903756 | 3.498334 | 2.590193 | 2.566537 | 1.91142   |
| Mus_musc Mus_musc | 0.251174 | 0.351999 | 0.293114 | 0.701982 | 0        | 0.21084   |
| ENSMUSG Mcm6      | 3.424382 | 2.975399 | 3.808844 | 5.013971 | 6.739759 | 7.992031  |
| ENSMUSG Ubxn4     | 24.0323  | 25.56755 | 24.79601 | 26.62885 | 25.91681 | 26.775771 |
| ENSMUSG Clic1     | 105.007  | 101.3451 | 120.6323 | 111.7713 | 112.5646 | 122.93831 |
| Mus_musc Mus_musc | 0        | 0        | 0        | 0        | 0        | 0         |
| Mus_musc Mus_musc | 0.210042 | 0        | 0        | 0        | 0        | 0         |
| Mus_musc Mus_musc | 0        | 0        | 0        | 0        | 0        | 0         |
| ENSMUSG Hmbox1    | 43.54329 | 41.22997 | 40.55035 | 30.31929 | 29.9895  | 28.334695 |
| ENSMUSG Olfr1408  | 0        | 0        | 0        | 0        | 0        | 0         |
| ENSMUSG Mppe1     | 9.390354 | 7.524354 | 9.219719 | 10.50105 | 9.462926 | 9.814281  |
| ENSMUSG Amdhd1    | 0.070599 | 0.10931  | 0.076478 | 0.191051 | 0.078116 | 0.382219  |
| ENSMUSG Syna      | 0.215132 | 0.576337 | 0.21905  | 0.531325 | 0.350809 | 0.461466  |
| Mus_musc Mus_musc | 0        | 0        | 0.096622 | 0        | 0.186692 | 0         |
| ENSMUSG Adamts6   | 0.684987 | 0.577336 | 0.762795 | 0.752412 | 0.486335 | 0.555457  |

|                   |          |          |          |          |          |           |
|-------------------|----------|----------|----------|----------|----------|-----------|
| ENSMUSG Kcng      | 5.219715 | 4.937536 | 3.41181  | 8.377329 | 6.526621 | 6.466069  |
| ENSMUSG Olig1     | 0        | 0        | 0        | 0        | 0        | 0         |
| ENSMUSG Gldn      | 0.050823 | 0.040581 | 0        | 0.011208 | 0.034188 | 0         |
| Mus_musc Mus_musc | 0        | 0        | 0        | 0.143307 | 0.119922 | 0         |
| Mus_musc Mus_musc | 2.059143 | 1.601865 | 1.941395 | 1.467323 | 1.717219 | 1.665698  |
| Mus_musc Mus_musc | 0.650241 | 0.303215 | 0.814048 | 0.417773 | 0.564363 | 0.563442  |
| Mus_musc Mus_musc | 0.174783 | 0.117306 | 0        | 0        | 0.116769 | 0.272295  |
| Mus_musc Mus_musc | 0        | 0        | 0        | 0        | 0        | 0.184186  |
| Mus_musc Mus_musc | 0.289345 | 0.535502 | 0.729897 | 0.306872 | 0.205788 | 0.165179  |
| ENSMUSG Olf1r319  | 0        | 0        | 0        | 0        | 0        | 0         |
| Mus_musc Mus_musc | 0        | 0.048601 | 0.107937 | 0.739182 | 0.339902 | 0.155478  |
| Mus_musc Mus_musc | 0        | 0        | 0        | 0        | 0        | 0         |
| Mus_musc Mus_musc | 0.262786 | 0        | 0        | 0        | 0        | 0         |
| Mus_musc Mus_musc | 0        | 0        | 0.168936 | 0        | 0        | 0         |
| Mus_musc Mus_musc | 0        | 0        | 0.064897 | 0.414369 | 0.407564 | 0.520988  |
| Mus_musc Mus_musc | 0        | 0        | 0.495816 | 0        | 0        | 0         |
| ENSMUSG Gm3159    | 0        | 0        | 0        | 0        | 0        | 0         |
| Mus_musc Mus_musc | 0        | 0        | 0        | 0        | 0.373385 | 0         |
| ENSMUSG Lax1      | 2.375271 | 1.498918 | 3.616728 | 16.08523 | 15.9983  | 14.489742 |
| ENSMUSG Ggct      | 0.628414 | 0.940807 | 1.429323 | 1.835702 | 1.333583 | 1.142052  |
| ENSMUSG Rab11fip4 | 2.195347 | 1.802425 | 2.245972 | 3.937766 | 4.192389 | 4.752562  |
| ENSMUSG Txlna     | 22.78419 | 21.99251 | 20.48702 | 22.94697 | 23.25849 | 25.145505 |
| ENSMUSG Abr       | 25.11368 | 23.93474 | 24.20122 | 28.35076 | 28.87764 | 31.497824 |
| ENSMUSG Jag2      | 15.6077  | 14.3829  | 17.74628 | 8.480588 | 9.685497 | 10.298058 |
| ENSMUSG Eef1akmt3 | 0.046749 | 0.109591 | 0.045791 | 0.696555 | 0.556767 | 0.715748  |
| ENSMUSG Them6     | 9.01927  | 7.325626 | 7.404777 | 5.733528 | 7.262065 | 6.943095  |
| ENSMUSG Npepps    | 15.91992 | 17.6843  | 16.70602 | 15.19115 | 17.28225 | 16.019619 |
| ENSMUSG Kpnb1     | 34.36072 | 34.96362 | 33.89573 | 32.46722 | 32.84027 | 33.539803 |
| ENSMUSG Mrpl10    | 17.64232 | 17.16191 | 17.3209  | 17.67492 | 16.54486 | 17.326664 |
| ENSMUSG Mrps21    | 39.69082 | 44.54227 | 43.24412 | 52.94134 | 40.31178 | 47.428156 |
| ENSMUSG Obox1     | 0        | 0        | 0        | 0        | 0        | 0         |
| ENSMUSG Sec14l4   | 36.06974 | 41.55207 | 31.45335 | 23.13029 | 22.23354 | 23.204617 |
| ENSMUSG D8Ertd738 | 71.74178 | 78.88598 | 88.59907 | 77.60683 | 69.2965  | 66.51815  |
| ENSMUSG Vmn2r39   | 0        | 0        | 0        | 0        | 0        | 0         |
| ENSMUSG Gm20896   | 0        | 0        | 0        | 0        | 0        | 0         |
| Mus_musc Mus_musc | 0        | 0        | 0        | 0        | 0.2201   | 0         |
| Mus_musc Mus_musc | 4.47307  | 5.390442 | 4.449395 | 5.666315 | 5.045619 | 4.020995  |
| Mus_musc Mus_musc | 0        | 0        | 0        | 0        | 0        | 0         |
| Mus_musc Mus_musc | 0        | 0.124654 | 0.082267 | 0.225215 | 0.329027 | 0.201584  |
| Mus_musc Mus_musc | 0.279161 | 0.472976 | 0.43727  | 0.418691 | 0.204233 | 0.515807  |
| Mus_musc Mus_musc | 0        | 0.114711 | 0        | 0        | 0        | 0.2836    |
| ENSMUSG Anxa9     | 2.886947 | 3.112297 | 2.914432 | 2.538556 | 2.581718 | 3.848907  |
| ENSMUSG Arnt2     | 0.139574 | 0.203541 | 0.141106 | 0.30763  | 0.259325 | 0.362339  |
| ENSMUSG Cntnap5b  | 0        | 0        | 0        | 0        | 0        | 0         |
| ENSMUSG Rdm1      | 19.34348 | 16.0444  | 17.5127  | 18.23999 | 16.8269  | 14.869821 |
| ENSMUSG Fam167b   | 0.730089 | 1.251375 | 0.755496 | 1.29035  | 1.681253 | 2.218506  |
| ENSMUSG Insl3     | 0.129668 | 0.198895 | 0.350218 | 0.180037 | 0.203008 | 0.367313  |
| ENSMUSG Ly6c1     | 320.4777 | 340.0592 | 802.81   | 409.8394 | 419.3348 | 337.24873 |
| ENSMUSG Serpina1c | 1.790999 | 1.215879 | 2.074868 | 1.013167 | 1.32657  | 0.852874  |
| ENSMUSG Serpina3i | 2.999785 | 2.049472 | 6.423837 | 7.175264 | 6.097673 | 5.882966  |
| ENSMUSG Kcnn3     | 2.470031 | 2.456535 | 1.909143 | 1.575015 | 2.242315 | 1.543805  |
| ENSMUSG Gm11034   | 0        | 0        | 0        | 0        | 0        | 0         |
| ENSMUSG Slc5a5    | 0.052641 | 0.15568  | 0.03283  | 0.145132 | 0.13409  | 0.03422   |
| ENSMUSG Mblac1    | 2.638622 | 1.930635 | 1.090335 | 1.773821 | 1.716342 | 1.401252  |
| ENSMUSG Serpina3j | 0        | 0        | 0        | 0        | 0        | 0         |
| ENSMUSG Serpina3m | 0.617924 | 0.340894 | 0.917806 | 2.012995 | 3.598138 | 2.049703  |
| Mus_musc Mus_musc | 6.373005 | 6.776696 | 8.028914 | 6.631837 | 7.622988 | 7.25873   |
| Mus_musc Mus_musc | 1.362436 | 0.959165 | 1.059922 | 1.362549 | 0.775823 | 1.237543  |
| Mus_musc Mus_musc | 0.134556 | 0.236254 | 0.264459 | 0.930519 | 0.778485 | 0.486038  |
| Mus_musc Mus_musc | 0.757919 | 0.151734 | 0.406618 | 0.146317 | 0.182378 | 0.063602  |
| Mus_musc Mus_musc | 0        | 0.150385 | 0.157576 | 0.151681 | 0.220503 | 0.405     |
| Mus_musc Mus_musc | 0        | 0        | 0.11246  | 0.202153 | 0.312872 | 0.147777  |
| Mus_musc Mus_musc | 0.056697 | 0.289771 | 0.267845 | 0.618029 | 0.729263 | 0.879084  |
| Mus_musc Mus_musc | 0        | 0        | 0        | 0.174016 | 0        | 0         |

|                   |          |          |          |          |          |           |
|-------------------|----------|----------|----------|----------|----------|-----------|
| ENSMUSG Fam19a5   | 0.283786 | 0.308269 | 0.426851 | 0.274161 | 0.242228 | 0.097899  |
| ENSMUSG Colec10   | 0.107154 | 0.056146 | 0.016058 | 0.085661 | 0.022385 | 0.035175  |
| ENSMUSG Kcnj1     | 0        | 0        | 0        | 0.074643 | 0        | 0.100509  |
| ENSMUSG Mul1      | 7.493885 | 8.514455 | 7.568303 | 6.976194 | 6.684822 | 6.839063  |
| ENSMUSG Lamp3     | 148.779  | 153.6821 | 135.5353 | 156.5783 | 149.3671 | 163.7861  |
| ENSMUSG Wnk3      | 0.015634 | 0.020712 | 0.03973  | 0.033843 | 0.023579 | 0.02714   |
| ENSMUSG Galnt1    | 30.10359 | 27.89053 | 31.38676 | 28.88831 | 31.30129 | 31.436637 |
| ENSMUSG Fev       | 0        | 0        | 0        | 0        | 0        | 0         |
| ENSMUSG Actbl2    | 0        | 0        | 0        | 0        | 0        | 0         |
| ENSMUSG Olfr1378  | 0        | 0        | 0        | 0        | 0        | 0         |
| ENSMUSG Kik15     | 0        | 0        | 0        | 0        | 0        | 0         |
| ENSMUSG Lix1l     | 14.80721 | 14.18688 | 15.40682 | 10.05818 | 11.09929 | 10.154435 |
| ENSMUSG Gm12830   | 0        | 0        | 0        | 0        | 0        | 0         |
| ENSMUSG Gm20662   | 0.063822 | 0.049256 | 0.011231 | 0.063381 | 0.052439 | 0.026231  |
| ENSMUSG Rnf223    | 0.04843  | 0.180364 | 0.064949 | 0.039914 | 0.060476 | 0.137886  |
| Mus_musc Mus_musc | 0        | 0        | 0        | 0        | 0        | 0         |
| Mus_musc Mus_musc | 0        | 0        | 0        | 0.808506 | 0        | 0.264095  |
| ENSMUSG Gm42372   | 0.041636 | 0.047995 | 0.084918 | 0.155746 | 0.283852 | 0.216211  |
| Mus_musc Mus_musc | 1.381902 | 1.420018 | 1.590394 | 1.561233 | 1.075395 | 0.981089  |
| ENSMUSG Atxn7l2   | 2.127375 | 1.646386 | 1.834862 | 1.984522 | 1.846965 | 1.244858  |
| ENSMUSG Dnajc3    | 45.77253 | 47.07111 | 47.83654 | 55.84947 | 60.51673 | 55.396805 |
| ENSMUSG Cldn10    | 5.933858 | 9.040716 | 4.881604 | 5.922029 | 7.575077 | 6.96677   |
| ENSMUSG Tgds      | 6.911654 | 5.819925 | 6.955691 | 5.747886 | 6.460415 | 6.771229  |
| ENSMUSG Gpr180    | 10.59856 | 9.899782 | 10.91593 | 10.92993 | 12.05356 | 12.700255 |
| ENSMUSG Gm10160   | 0        | 0        | 0        | 0        | 0        | 0         |
| ENSMUSG Mbnl2     | 74.36591 | 89.12596 | 66.00109 | 67.70719 | 60.10754 | 55.072173 |
| ENSMUSG Nap1l3    | 1.613677 | 1.609559 | 1.280806 | 1.257492 | 1.275654 | 0.956769  |
| ENSMUSG Ces2a     | 0        | 0        | 0        | 0        | 0        | 0         |
| ENSMUSG Ghr       | 28.2785  | 30.23727 | 27.15169 | 22.87433 | 20.45345 | 20.830294 |
| ENSMUSG Slit3     | 13.88581 | 10.71996 | 12.53713 | 11.70959 | 11.08977 | 11.410106 |
| ENSMUSG Vmn2r78   | 0        | 0        | 0        | 0        | 0        | 0         |
| ENSMUSG Vmn2r-psl | 0        | 0        | 0        | 0        | 0        | 0         |
| ENSMUSG Ubqlnl    | 0        | 0        | 0        | 0        | 0        | 0         |
| ENSMUSG Cd14      | 12.50828 | 12.4321  | 11.59867 | 22.25115 | 27.65814 | 23.339397 |
| ENSMUSG Tgoln1    | 68.78164 | 73.35583 | 68.10281 | 78.5415  | 78.227   | 80.239487 |
| ENSMUSG Olfr532   | 0        | 0        | 0        | 0        | 0        | 0         |
| ENSMUSG Dupd1     | 0        | 0        | 0        | 0        | 0.018374 | 0         |
| ENSMUSG Arl9      | 0.206352 | 0        | 0.139198 | 0.200885 | 0.374616 | 0.107615  |
| ENSMUSG Olfr1382  | 0        | 0        | 0        | 0        | 0        | 0         |
| ENSMUSG Pdxdc1    | 21.53032 | 20.34971 | 19.47267 | 20.9746  | 20.63023 | 21.990534 |
| ENSMUSG Ntan1     | 25.44208 | 23.92334 | 23.67463 | 22.81272 | 23.24863 | 20.369609 |
| ENSMUSG Rrn3      | 10.25989 | 9.029174 | 9.503272 | 8.523245 | 8.59418  | 8.467759  |
| ENSMUSG Pla2g10   | 0        | 0        | 0        | 0.420429 | 0.207946 | 0.424677  |
| ENSMUSG Bfar      | 11.18847 | 11.02661 | 11.51228 | 12.03955 | 12.51071 | 12.959624 |
| ENSMUSG Parn      | 7.429368 | 6.723577 | 6.119895 | 6.840602 | 6.926608 | 6.147739  |
| ENSMUSG B3gnt5    | 2.370694 | 1.899681 | 1.770271 | 2.033409 | 1.853822 | 2.362567  |
| ENSMUSG Boc       | 7.719828 | 9.024838 | 7.63547  | 5.829717 | 6.166132 | 5.809377  |
| ENSMUSG Tnfaip8l2 | 8.843176 | 8.426085 | 10.95059 | 14.50895 | 14.35052 | 15.595093 |
| ENSMUSG Timm23    | 20.73527 | 20.93569 | 22.01124 | 27.07642 | 26.04105 | 27.07602  |
| ENSMUSG Mab21l2   | 0        | 0        | 0.028062 | 0        | 0        | 0         |
| ENSMUSG Olfr668   | 0        | 0        | 0        | 0        | 0        | 0         |
| ENSMUSG Cyb5d2    | 3.643842 | 3.858811 | 2.47609  | 3.56655  | 3.943532 | 3.786753  |
| ENSMUSG Psmc13    | 30.16815 | 27.47503 | 30.11948 | 27.13394 | 25.90889 | 28.906578 |
| ENSMUSG Sirt3     | 8.460629 | 8.304482 | 7.150631 | 7.750648 | 6.790544 | 7.389564  |
| ENSMUSG Ric8a     | 24.11963 | 21.44376 | 21.04486 | 20.39    | 20.02829 | 18.700972 |
| ENSMUSG Bet1l     | 11.60566 | 12.38898 | 12.99975 | 12.30013 | 11.87042 | 12.026828 |
| ENSMUSG Odf3      | 0        | 0        | 0.018808 | 0.005997 | 0        | 0         |
| ENSMUSG Urah      | 4.338634 | 6.515027 | 5.009606 | 5.899889 | 5.871932 | 5.863661  |
| ENSMUSG Syce1     | 0.045978 | 0.082122 | 0        | 0        | 0        | 0         |
| ENSMUSG Ifitm5    | 0.550853 | 0.537466 | 1.014559 | 0.201217 | 0.295387 | 0.33044   |
| ENSMUSG Cox8b     | 1.204446 | 3.973035 | 1.746612 | 2.425592 | 0.789294 | 0.476838  |
| ENSMUSG Fn3krp    | 3.83129  | 4.076581 | 4.815954 | 3.280619 | 4.559998 | 3.676453  |
| ENSMUSG Lgi2      | 1.184152 | 1.127001 | 1.177517 | 1.247393 | 1.292234 | 1.30739   |
| ENSMUSG Vstm2b    | 0.047598 | 0.03683  | 0.131252 | 0.293516 | 0.359242 | 0.272388  |



|                    |          |          |          |          |          |           |
|--------------------|----------|----------|----------|----------|----------|-----------|
| ENSMUSG Pomt1      | 3.373081 | 3.868291 | 3.742701 | 3.538115 | 4.342188 | 4.087368  |
| ENSMUSG Btd35f13   | 0        | 0        | 0        | 0        | 0        | 0         |
| ENSMUSG Gm11238    | 0        | 0        | 0        | 0        | 0        | 0         |
| ENSMUSG Zscan4e    | 0        | 0        | 0        | 0        | 0        | 0         |
| ENSMUSG Tdp2       | 7.861555 | 6.906646 | 6.733308 | 6.722717 | 7.805438 | 7.372286  |
| ENSMUSG Vmn1r159   | 0        | 0        | 0        | 0        | 0        | 0         |
| ENSMUSG Vmn1r49    | 0        | 0        | 0        | 0        | 0        | 0         |
| ENSMUSG Dock4      | 13.26272 | 10.43033 | 13.11523 | 8.155341 | 6.787372 | 8.576463  |
| ENSMUSG Ascl3      | 0.219191 | 0.168864 | 0.311567 | 0        | 0.237899 | 0         |
| ENSMUSG Pip4p1     | 19.00071 | 16.5906  | 17.80523 | 16.16507 | 17.98159 | 18.186644 |
| ENSMUSG Dmrtc1c1   | 0        | 0        | 0        | 0        | 0        | 0         |
| ENSMUSG Dmrtc1c2   | 0        | 0        | 0        | 0        | 0        | 0         |
| ENSMUSG Hdac8      | 4.503819 | 4.548417 | 4.543169 | 4.213824 | 4.496335 | 4.163171  |
| ENSMUSG Bdh2       | 0.553185 | 0.560971 | 0.503234 | 0.227972 | 0.417375 | 0.268579  |
| ENSMUSG Cisd2      | 13.30188 | 13.43999 | 14.76036 | 14.27887 | 11.49981 | 13.06956  |
| ENSMUSG Lage3      | 11.52613 | 12.65381 | 14.94276 | 13.49179 | 16.32783 | 14.77536  |
| ENSMUSG Nfkb1      | 33.26723 | 33.7987  | 35.98441 | 38.19527 | 37.57236 | 37.475507 |
| ENSMUSG Ppp3ca     | 41.84563 | 43.6359  | 38.72576 | 33.07665 | 30.71326 | 31.727515 |
| ENSMUSG Vmn1r213   | 0        | 0        | 0        | 0        | 0        | 0         |
| ENSMUSG Olfr475-ps | 0        | 0        | 0        | 0        | 0        | 0         |
| ENSMUSG Cd68       | 35.93617 | 29.40573 | 36.04842 | 95.9291  | 99.69271 | 127.23474 |
| ENSMUSG Slc35g3    | 0.559145 | 0.569319 | 0.477141 | 0.779918 | 0.685366 | 0.61636   |
| ENSMUSG Atp5g3     | 87.69204 | 97.55956 | 95.47801 | 108.5263 | 100.2459 | 113.71717 |
| ENSMUSG Krtap20-2  | 0        | 0        | 0        | 0        | 0        | 0         |
| ENSMUSG Ccl27a     | 0.999458 | 1.42205  | 1.525336 | 1.236167 | 0.951271 | 0.736519  |
| ENSMUSG Il11ra1    | 20.08937 | 20.29351 | 20.92205 | 22.88105 | 24.64157 | 27.396995 |
| ENSMUSG Slc6a19    | 0        | 0        | 0        | 0.026483 | 0        | 0.043286  |
| ENSMUSG Nkd2       | 6.023795 | 6.054094 | 4.981298 | 2.441967 | 3.398163 | 2.800797  |
| ENSMUSG Reep1      | 7.208758 | 7.368621 | 8.125007 | 3.449479 | 4.452569 | 4.508657  |
| ENSMUSG Gm43738    | 0        | 0        | 0        | 0        | 0        | 0         |
| ENSMUSG Tas2r137   | 0        | 0        | 0        | 0.036976 | 0        | 0         |
| ENSMUSG Nrk        | 0.03813  | 0.020625 | 0.042092 | 0.012376 | 0        | 0.033503  |
| ENSMUSG Cct8l1     | 0.028766 | 0.047213 | 0        | 0        | 0        | 0.020382  |
| ENSMUSG Pcdhgb6    | 1.92775  | 1.716727 | 1.955516 | 1.454539 | 1.86649  | 1.252701  |
| ENSMUSG Gm38119    | 0        | 0        | 0        | 0        | 0        | 0         |
| ENSMUSG Pcdhgb8    | 0.917689 | 0.63064  | 0.609139 | 0.4011   | 0.245958 | 0.472523  |
| ENSMUSG Gpr141     | 1.551127 | 1.224118 | 5.396037 | 2.772304 | 1.221189 | 1.279536  |
| ENSMUSG Arl13b     | 7.74585  | 7.871304 | 7.255156 | 6.612466 | 6.441909 | 5.994458  |
| ENSMUSG Pros1      | 31.41005 | 31.4185  | 35.00942 | 29.20266 | 31.7923  | 29.519812 |
| ENSMUSG Psmg1      | 5.085854 | 7.322792 | 8.077219 | 6.927227 | 6.023423 | 7.705478  |
| ENSMUSG Brwd1      | 14.58235 | 15.20587 | 12.76096 | 12.90219 | 12.8202  | 14.035765 |
| ENSMUSG Glrx2      | 5.545738 | 5.802883 | 5.77869  | 5.641829 | 6.576147 | 5.10012   |
| ENSMUSG Trove2     | 11.75181 | 12.07784 | 9.875012 | 8.638275 | 8.691802 | 8.35869   |
| ENSMUSG Urb1       | 2.102142 | 2.234984 | 1.943007 | 2.021741 | 2.013857 | 2.195563  |
| ENSMUSG Myh2       | 0        | 0        | 0.016247 | 0        | 0        | 0         |
| ENSMUSG Grm1       | 0        | 0.005878 | 0        | 0.006679 | 0.042672 | 0.005422  |
| ENSMUSG Vsig1      | 0.218872 | 0.161777 | 0.093736 | 1.040626 | 0.748838 | 1.315976  |
| ENSMUSG Smpd2      | 14.21582 | 14.36819 | 14.24955 | 13.34942 | 12.25405 | 13.348116 |
| ENSMUSG Mical1     | 11.96099 | 8.59737  | 11.42838 | 12.51615 | 11.11908 | 13.158095 |
| ENSMUSG Utrn       | 47.5254  | 45.84985 | 37.90799 | 29.06987 | 27.83413 | 27.452144 |
| ENSMUSG Zbtb24     | 5.860031 | 5.957489 | 5.755319 | 5.231903 | 5.989694 | 5.127152  |
| ENSMUSG Slc35g2    | 3.155262 | 2.883254 | 3.119794 | 2.162725 | 2.194281 | 2.560884  |
| ENSMUSG Gmppb      | 7.168118 | 5.31396  | 5.576981 | 8.954542 | 8.20394  | 8.197957  |
| ENSMUSG Ndufaf3    | 10.5075  | 11.50011 | 10.61512 | 8.252828 | 8.595899 | 9.281395  |
| ENSMUSG Slc22a14   | 0.42135  | 0.232057 | 0.466273 | 0.315557 | 0.17505  | 0.1732    |
| ENSMUSG Slc22a28   | 0        | 0        | 0        | 0        | 0        | 0         |
| ENSMUSG Gng8       | 0.405143 | 1.126955 | 0.541902 | 0.393037 | 0.378526 | 0.072334  |
| ENSMUSG Nr1i2      | 0.20534  | 0.424668 | 0.234115 | 0.531659 | 0.423623 | 0.233966  |
| ENSMUSG Vapb       | 18.70649 | 18.49452 | 19.09149 | 16.00963 | 17.28757 | 15.682729 |
| ENSMUSG Gm9945     | 0        | 0        | 0        | 0        | 0        | 0         |
| ENSMUSG Aes        | 160.5824 | 165.7515 | 168.9504 | 151.8599 | 142.7781 | 156.10029 |
| ENSMUSG Sytl5      | 0.50673  | 0.576598 | 0.211299 | 0.17636  | 0.37736  | 0.444016  |
| ENSMUSG Vsnl1      | 6.947776 | 7.779766 | 9.35616  | 5.030282 | 4.242125 | 3.405268  |
| ENSMUSG Timm13     | 23.15552 | 23.83746 | 27.23406 | 27.47736 | 25.38198 | 25.600289 |

|                   |          |          |          |          |          |           |
|-------------------|----------|----------|----------|----------|----------|-----------|
| ENSMUSG Wif1      | 5.091767 | 5.102767 | 3.375225 | 2.950158 | 3.233187 | 2.322661  |
| ENSMUSG Ing2      | 5.394369 | 4.678693 | 4.48612  | 3.831388 | 4.47889  | 4.764804  |
| ENSMUSG F2        | 0        | 0.127763 | 0.127297 | 0.419109 | 0.178569 | 0.252746  |
| ENSMUSG Pdia3     | 150.9482 | 161.2077 | 172.508  | 202.6826 | 218.0351 | 213.7706  |
| ENSMUSG Arhgap1   | 45.10862 | 36.93949 | 41.41049 | 34.3091  | 32.23825 | 34.361901 |
| ENSMUSG Ell3      | 0.818366 | 0.085801 | 0.357168 | 0.942934 | 0.592832 | 0.473669  |
| ENSMUSG Hypk      | 20.56805 | 11.96174 | 12.35201 | 23.36217 | 9.095593 | 17.755484 |
| ENSMUSG Mdm1      | 5.419584 | 5.917423 | 5.868276 | 6.139587 | 5.22663  | 5.897797  |
| ENSMUSG Harbi1    | 3.371161 | 3.73378  | 3.091364 | 3.848835 | 3.706893 | 4.07789   |
| ENSMUSG Glipr1l2  | 0        | 0        | 0        | 0        | 0        | 0         |
| ENSMUSG Jsrp1     | 0        | 0        | 0        | 0.100601 | 0.181272 | 0         |
| ENSMUSG Samd11    | 0        | 0        | 0.075235 | 0.974043 | 0.280651 | 0.364962  |
| ENSMUSG Lpar6     | 2.152327 | 1.72955  | 2.903574 | 2.722676 | 2.000409 | 2.63035   |
| ENSMUSG Gm10799   | 0        | 0        | 0        | 0        | 0        | 0         |
| ENSMUSG Olfr889   | 0        | 0        | 0        | 0        | 0        | 0         |
| Mus_musc Mus_musc | 0.154947 | 0        | 0.253873 | 0.308383 | 0.061443 | 0         |
| ENSMUSG Vash2     | 0.01399  | 0.179274 | 0.124632 | 0.310355 | 0.198504 | 0.355585  |
| ENSMUSG Rhox5     | 0        | 0.061396 | 0        | 0        | 0        | 0         |
| ENSMUSG Rps16     | 207.4024 | 208.2763 | 223.8245 | 235.2789 | 215.9413 | 225.437   |
| Mus_musc Mus_musc | 0        | 0        | 0        | 0.529449 | 0.189579 | 0.110844  |
| Mus_musc Mus_musc | 0        | 0        | 0        | 0        | 0        | 0         |
| ENSMUSG Xylt1     | 1.17651  | 0.841807 | 0.982302 | 1.856822 | 2.002731 | 2.140461  |
| ENSMUSG Gm10718   | 0        | 0        | 0        | 0        | 0        | 0         |
| Mus_musc Mus_musc | 0.286561 | 0.257483 | 0.181809 | 0.208397 | 0.182851 | 0.21458   |
| ENSMUSG Olfr1477  | 0        | 0        | 0        | 0        | 0        | 0         |
| ENSMUSG Cnga3     | 0        | 0.013026 | 0        | 0        | 0.025687 | 0         |
| ENSMUSG Tmem131   | 12.96582 | 14.04275 | 13.10791 | 14.37692 | 14.69587 | 14.748896 |
| ENSMUSG Zap70     | 3.916143 | 3.268059 | 4.686294 | 5.864387 | 5.544305 | 6.561258  |
| ENSMUSG Mgat4a    | 3.045803 | 3.528754 | 3.057581 | 4.680477 | 4.540036 | 4.751027  |
| ENSMUSG Unc50     | 35.04998 | 35.96777 | 38.24467 | 35.76879 | 33.18552 | 30.175334 |
| ENSMUSG Coa5      | 22.73859 | 23.48351 | 23.41158 | 25.98048 | 25.88001 | 28.275618 |
| ENSMUSG Inpp4a    | 7.989956 | 8.462614 | 7.779851 | 7.515144 | 7.460111 | 8.220306  |
| ENSMUSG Erbb2     | 11.50127 | 9.96231  | 9.76627  | 8.491624 | 8.873797 | 9.702864  |
| ENSMUSG Glrp1     | 0.113088 | 0.023655 | 0.061463 | 0.011115 | 0.204627 | 0.126116  |
| ENSMUSG Olfr1505  | 0        | 0        | 0        | 0        | 0        | 0         |
| Mus_musc Mus_musc | 0        | 0        | 0        | 0.173428 | 0.186692 | 0         |
| ENSMUSG Tmem63c   | 0.070479 | 0.064687 | 0.055106 | 0.023069 | 0.085921 | 0.097476  |
| ENSMUSG Gm10720   | 0        | 0        | 0        | 0        | 0        | 0         |
| ENSMUSG Gcnt7     | 0        | 0.072498 | 0.04231  | 0.152147 | 0        | 0.087613  |
| ENSMUSG Vmn1r52   | 0        | 0        | 0        | 0        | 0        | 0         |
| ENSMUSG Edar      | 0.479514 | 0.213623 | 0.323798 | 0.368463 | 0.226474 | 0.23179   |
| ENSMUSG Ranbp2    | 21.70503 | 23.76918 | 18.42588 | 20.65033 | 20.77323 | 20.717464 |
| ENSMUSG Grk5      | 25.9561  | 28.22896 | 30.12379 | 22.86193 | 25.42438 | 20.534119 |
| ENSMUSG Rcn1      | 26.34321 | 26.23703 | 35.52647 | 25.50018 | 25.10147 | 23.131424 |
| ENSMUSG Olfr694   | 0        | 0        | 0        | 0        | 0        | 0         |
| ENSMUSG Rpl27a    | 213.0828 | 225.5918 | 241.2073 | 234.0316 | 235.3681 | 237.14987 |
| ENSMUSG Mgat4e    | 0        | 0        | 0        | 0        | 0        | 0         |
| ENSMUSG Arhgap15  | 2.854793 | 2.472676 | 3.411432 | 5.822285 | 5.95316  | 5.835089  |
| ENSMUSG 5330417H  | 0        | 0        | 0        | 0        | 0        | 0         |
| ENSMUSG Rxfp4     | 0.081707 | 0.058005 | 0.292008 | 0.104829 | 0.085774 | 0.136845  |
| ENSMUSG Vmn1r226  | 0        | 0        | 0        | 0        | 0        | 0         |
| ENSMUSG Olfr1414  | 0        | 0        | 0        | 0        | 0        | 0         |
| ENSMUSG Wfdc12    | 0.277801 | 0.094178 | 0.229099 | 0.167213 | 0.168625 | 0         |
| ENSMUSG Lrrtm3    | 0        | 0        | 0.012922 | 0        | 0        | 0         |
| ENSMUSG Serpinb6b | 46.08824 | 48.63031 | 46.47401 | 45.2255  | 47.03569 | 50.939566 |
| ENSMUSG Tfp2d     | 0        | 0        | 0        | 0        | 0        | 0         |
| ENSMUSG Ttf1      | 5.581573 | 7.08648  | 5.898167 | 6.77429  | 6.373853 | 6.827241  |
| ENSMUSG Sh2b3     | 29.02995 | 24.80736 | 26.96065 | 17.81946 | 19.85332 | 19.425887 |
| ENSMUSG Fam199x   | 2.925159 | 3.138136 | 2.381249 | 2.438302 | 2.509515 | 2.271823  |
| ENSMUSG Ddx31     | 2.382584 | 2.633211 | 2.69518  | 3.375724 | 2.638777 | 2.565067  |
| ENSMUSG Ak8       | 3.032982 | 3.6629   | 2.262311 | 5.137419 | 4.432623 | 4.386445  |
| ENSMUSG lpo11     | 7.991623 | 8.155672 | 7.797267 | 7.455331 | 7.450322 | 7.637668  |
| ENSMUSG Barhl1    | 0.013951 | 0.031569 | 0.035575 | 0.009826 | 0.07593  | 0         |
| ENSMUSG Spaca9    | 4.911792 | 6.388755 | 5.042209 | 8.030895 | 5.656172 | 6.816505  |

|                   |          |          |          |          |          |           |
|-------------------|----------|----------|----------|----------|----------|-----------|
| ENSMUSG Kdm7a     | 7.481591 | 8.018258 | 7.04632  | 7.685234 | 8.065661 | 7.34422   |
| ENSMUSG Adam30    | 0        | 0        | 0        | 0        | 0        | 0         |
| ENSMUSG Zbtb37    | 1.430296 | 1.662761 | 1.462735 | 1.38634  | 1.324878 | 1.234525  |
| ENSMUSG Sptssb    | 1.330189 | 1.105663 | 0.761107 | 1.135807 | 1.558679 | 1.101775  |
| ENSMUSG Elfn2     | 0.015187 | 0        | 0        | 0        | 0        | 0.007331  |
| ENSMUSG Rab9b     | 0        | 0        | 0        | 0        | 0        | 0         |
| ENSMUSG Wdr86     | 0.406845 | 0.490735 | 0.238778 | 1.412317 | 0.961339 | 1.540404  |
| ENSMUSG Crybb3    | 1.187865 | 0.445151 | 1.11974  | 0.518575 | 0.654353 | 0.281947  |
| ENSMUSG Ren1      | 0        | 0        | 0        | 0        | 0        | 0         |
| ENSMUSG Tesc      | 1.388189 | 1.908986 | 1.147411 | 2.004694 | 1.419772 | 1.469408  |
| ENSMUSG Neu3      | 1.890332 | 2.464468 | 1.724504 | 1.897302 | 2.055572 | 2.731977  |
| ENSMUSG Kcnk15    | 0        | 0        | 0.026507 | 0        | 0        | 0         |
| ENSMUSG Etnk2     | 0.173461 | 0.10715  | 0.122381 | 0.130077 | 0.105985 | 0         |
| ENSMUSG Spred1    | 18.24763 | 19.20026 | 16.74127 | 13.51999 | 13.48554 | 12.547443 |
| ENSMUSG Pdk3      | 10.56185 | 9.481338 | 8.077225 | 8.754329 | 9.427037 | 10.398235 |
| ENSMUSG Trim13    | 5.801628 | 4.738357 | 4.869103 | 3.591628 | 3.495724 | 3.802976  |
| ENSMUSG Abraxas1  | 1.873634 | 2.298049 | 2.176065 | 1.867973 | 1.491484 | 1.613673  |
| ENSMUSG Lcat      | 0.572221 | 0.504092 | 0.638483 | 0.501172 | 0.482173 | 0.502875  |
| ENSMUSG Scai      | 1.923303 | 2.087363 | 1.597337 | 2.096117 | 1.93533  | 1.985838  |
| ENSMUSG Chad      | 4.267194 | 8.023898 | 1.762668 | 18.46436 | 19.55669 | 19.097044 |
| ENSMUSG Olfr355   | 0        | 0        | 0        | 0        | 0        | 0         |
| ENSMUSG Olfr351   | 0        | 0        | 0        | 0        | 0        | 0         |
| ENSMUSG Olfr353   | 0        | 0        | 0        | 0        | 0        | 0         |
| ENSMUSG Olfr3     | 0        | 0        | 0        | 0        | 0        | 0         |
| ENSMUSG Olfr341   | 0        | 0        | 0        | 0        | 0        | 0         |
| ENSMUSG Aco1      | 18.57773 | 17.58475 | 16.82956 | 18.75088 | 20.00972 | 20.440966 |
| ENSMUSG Smim27    | 1.611782 | 1.647714 | 1.713185 | 1.463847 | 1.636541 | 1.224579  |
| ENSMUSG Mpdz      | 6.403914 | 6.412607 | 6.263958 | 4.334203 | 4.50436  | 4.322504  |
| ENSMUSG Zdhhc21   | 3.889062 | 4.050285 | 3.826884 | 3.751568 | 3.773614 | 4.124975  |
| ENSMUSG Smu1      | 24.98515 | 24.12268 | 24.07614 | 21.68812 | 22.43886 | 20.773794 |
| ENSMUSG Pcdhgc5   | 0.179122 | 0.298486 | 0.206007 | 0.216356 | 0.235018 | 0.262112  |
| ENSMUSG Olfr1394  | 0        | 0        | 0        | 0        | 0        | 0         |
| ENSMUSG Bmp2      | 2.820736 | 2.558799 | 2.366247 | 1.434862 | 1.569056 | 1.518928  |
| Mus_musc Mus_musc | 0        | 0        | 0        | 0        | 0        | 0.368372  |
| Mus_musc Mus_musc | 1.700314 | 2.395133 | 1.416091 | 2.677134 | 2.62099  | 1.561597  |
| Mus_musc Mus_musc | 0        | 0        | 0        | 0        | 0.119029 | 0         |
| Mus_musc Mus_musc | 0        | 0        | 0        | 0        | 0        | 0         |
| Mus_musc Mus_musc | 0        | 0.108168 | 0        | 1.047955 | 0.595877 | 0.904661  |
| Mus_musc Mus_musc | 0        | 0        | 0.168936 | 0        | 0        | 0         |
| ENSMUSG Tmbim1    | 60.0884  | 55.29309 | 58.53294 | 47.33977 | 37.38688 | 40.259486 |
| ENSMUSG Kmt2b     | 11.8189  | 11.40053 | 12.64458 | 11.02852 | 10.77664 | 11.123067 |
| ENSMUSG Arpc2     | 161.8964 | 155.001  | 170.7953 | 163.7806 | 160.6201 | 173.75434 |
| ENSMUSG Slc25a26  | 3.684125 | 4.259792 | 3.731995 | 3.49925  | 2.657184 | 3.666779  |
| ENSMUSG Tnfrsf14  | 8.373234 | 7.679443 | 10.94502 | 10.24823 | 6.689064 | 9.901729  |
| ENSMUSG Poln      | 0        | 0.082427 | 0.063537 | 0.084651 | 0.066324 | 0         |
| ENSMUSG Specc1    | 11.99333 | 11.5239  | 10.61877 | 8.864185 | 10.49316 | 8.718468  |
| ENSMUSG Ccdc73    | 0.454311 | 0.28514  | 0.480645 | 0.252221 | 0.31572  | 0.341     |
| ENSMUSG Saysd1    | 5.109257 | 4.392248 | 4.399637 | 4.283955 | 4.023039 | 3.880561  |
| ENSMUSG Krtap4-7  | 0        | 0        | 0        | 0        | 0        | 0         |
| ENSMUSG Cyp2d40   | 0        | 0        | 0        | 0        | 0        | 0         |
| Mus_musc Mus_musc | 0        | 0.154309 | 0        | 0        | 0        | 0         |
| ENSMUSG 1700056E2 | 0.175003 | 0.255161 | 0.567954 | 0.462664 | 0.294422 | 0.155235  |
| ENSMUSG Lemd2     | 15.83888 | 15.67122 | 18.33865 | 14.57926 | 13.40797 | 15.186671 |
| ENSMUSG Gm5724    | 0        | 0        | 0        | 0        | 0        | 0         |
| ENSMUSG Luc7l     | 14.79395 | 14.16352 | 14.4195  | 11.78522 | 11.86514 | 11.620107 |
| ENSMUSG Pdia2     | 0.032777 | 0.217522 | 0.077057 | 0.208505 | 0.031029 | 0.109698  |
| ENSMUSG Fam234a   | 19.22224 | 18.60158 | 19.97159 | 18.50092 | 18.12008 | 19.893524 |
| ENSMUSG Rgs11     | 3.321764 | 3.653848 | 4.451405 | 3.730854 | 2.401501 | 2.577506  |
| ENSMUSG Mrpl28    | 19.06784 | 21.66848 | 21.17697 | 23.41666 | 21.47956 | 22.566639 |
| ENSMUSG Tmem8     | 8.671846 | 8.853929 | 8.530398 | 9.185133 | 9.27766  | 9.701946  |
| ENSMUSG Axin1     | 15.62621 | 14.65005 | 15.22813 | 13.30323 | 13.57606 | 13.60496  |
| ENSMUSG Nnmt      | 1.43863  | 1.41571  | 0.919026 | 1.035087 | 0.568132 | 0.499934  |
| ENSMUSG Rab26     | 0.089015 | 0.229113 | 0.413593 | 0.253098 | 0.4896   | 0.547225  |
| ENSMUSG Gm5168    | 0        | 0        | 0        | 0        | 0        | 0         |

|                   |          |          |          |          |          |           |
|-------------------|----------|----------|----------|----------|----------|-----------|
| ENSMUSG Prrt4     | 2.462269 | 2.492473 | 3.159591 | 1.901679 | 2.130788 | 1.843698  |
| ENSMUSG Paqr5     | 0.279516 | 0.393649 | 0.201482 | 0.45983  | 0.301085 | 0.415944  |
| ENSMUSG H2-Q5     | 16.71811 | 13.86377 | 50.27018 | 32.31611 | 18.78114 | 27.230648 |
| ENSMUSG Tmem243   | 46.09337 | 40.99641 | 46.45965 | 44.82222 | 39.23117 | 44.559568 |
| Mus_musc Mus_musc | 0        | 0        | 0        | 0        | 0.147081 | 0.30097   |
| ENSMUSG Pnma5     | 0        | 0.004987 | 0.06806  | 0        | 0        | 0.019841  |
| ENSMUSG Crb3      | 25.12073 | 25.60525 | 24.73901 | 23.88703 | 18.3521  | 23.020855 |
| ENSMUSG Fam221b   | 0.139024 | 0        | 0.087814 | 0.067564 | 0        | 0         |
| ENSMUSG Tmc8      | 2.850399 | 2.087561 | 3.264085 | 3.08123  | 2.905303 | 3.199544  |
| ENSMUSG Svil      | 35.17804 | 32.3613  | 30.44349 | 24.01028 | 24.95947 | 25.277079 |
| ENSMUSG Map3k8    | 4.337459 | 5.288501 | 6.242878 | 3.728647 | 4.389487 | 3.395437  |
| ENSMUSG Mtpap     | 9.186667 | 8.768333 | 8.611567 | 6.601065 | 7.451877 | 7.237769  |
| ENSMUSG Lylz1     | 0        | 0        | 0        | 0        | 0        | 0         |
| ENSMUSG Drp2      | 0.034715 | 0.153401 | 0.021309 | 0.084167 | 0.078288 | 0.115249  |
| ENSMUSG Cul2      | 8.316624 | 8.661007 | 7.586154 | 7.708105 | 7.009727 | 8.785225  |
| ENSMUSG Olfr305   | 0        | 0        | 0        | 0        | 0        | 0         |
| ENSMUSG Bpifc     | 0        | 0.019616 | 0        | 0        | 0.065905 | 0.064882  |
| ENSMUSG Zeb1      | 26.75577 | 25.43551 | 21.84334 | 17.68564 | 16.72037 | 14.330791 |
| Mus_musc Mus_musc | 0        | 0        | 0.22978  | 0        | 0.491335 | 0         |
| Mus_musc Mus_musc | 0        | 0.039634 | 0        | 0.156138 | 0.343495 | 0.540059  |
| Mus_musc Mus_musc | 0.114638 | 0.135885 | 0.614669 | 1.426171 | 0.256916 | 0.450128  |
| Mus_musc Mus_musc | 0.617234 | 0.327348 | 0.141392 | 0.550105 | 0.226263 | 0.307644  |
| Mus_musc Mus_musc | 0        | 0        | 0        | 0.174016 | 0        | 0         |
| Mus_musc Mus_musc | 0        | 0.616682 | 0.312653 | 0.399237 | 0        | 0.406137  |
| Mus_musc Mus_musc | 0.09843  | 0        | 0        | 0.149507 | 0        | 0         |
| Mus_musc Mus_musc | 0        | 0.349063 | 0        | 0        | 0        | 0         |
| Mus_musc Mus_musc | 0        | 0.132896 | 0.097312 | 0        | 0.116223 | 0         |
| Mus_musc Mus_musc | 0        | 0        | 0.071087 | 0        | 0        | 0         |
| Mus_musc Mus_musc | 0        | 0        | 0.168936 | 0        | 0        | 0         |
| ENSMUSG Olfr365   | 0        | 0        | 0        | 0        | 0        | 0         |
| ENSMUSG Zfp933    | 2.080104 | 2.547062 | 1.989385 | 2.452311 | 1.964587 | 2.108615  |
| ENSMUSG Adam32    | 0.06961  | 0        | 0.187313 | 0.063498 | 0        | 0.042927  |
| ENSMUSG Coq5      | 12.14751 | 11.2965  | 11.48828 | 9.825762 | 9.597563 | 10.850035 |
| ENSMUSG Pgm5      | 16.84722 | 17.95086 | 14.30032 | 16.41646 | 15.10421 | 16.782473 |
| ENSMUSG Prrx1     | 0        | 0        | 0        | 0        | 0        | 0         |
| ENSMUSG Tmem45b   | 0        | 0.971059 | 0        | 0.630579 | 0.240033 | 0.097775  |
| ENSMUSG Tspo      | 127.3358 | 122.4325 | 134.4333 | 129.1738 | 134.2093 | 140.31965 |
| ENSMUSG Gm13178   | 0        | 0        | 0        | 0        | 0        | 0         |
| ENSMUSG Kirrel    | 4.613343 | 4.439766 | 4.571044 | 3.613646 | 3.579136 | 4.007029  |
| ENSMUSG Phf13     | 6.674953 | 6.760431 | 5.878662 | 4.740026 | 5.18399  | 5.800906  |
| ENSMUSG Ankfn1    | 0.486551 | 0.942854 | 0.425098 | 0.769957 | 1.254536 | 0.831271  |
| ENSMUSG P2ry1     | 2.05113  | 1.997258 | 2.090945 | 3.074771 | 3.983152 | 2.360781  |
| ENSMUSG Aadac     | 0        | 0        | 0        | 0        | 0        | 0         |
| ENSMUSG Sucnr1    | 0        | 0.073373 | 0.027314 | 0.066461 | 0.070827 | 0.035172  |
| ENSMUSG Mbnl1     | 58.03486 | 53.49847 | 53.42349 | 62.52828 | 52.37704 | 53.312956 |
| ENSMUSG Fkbp2     | 42.11517 | 40.12814 | 46.69899 | 61.43677 | 63.15843 | 58.31823  |
| ENSMUSG Fbh1      | 19.7922  | 21.41102 | 19.52037 | 18.37331 | 18.76368 | 19.276903 |
| ENSMUSG Hip1r     | 12.7876  | 12.12874 | 13.36301 | 12.27344 | 12.61191 | 14.001187 |
| ENSMUSG Nsun5     | 4.302366 | 4.882324 | 4.532733 | 3.348833 | 3.569742 | 4.069494  |
| Mus_musc Mus_musc | 0        | 0        | 0        | 0.696065 | 0        | 0         |
| Mus_musc Mus_musc | 0.119021 | 0.318085 | 0.157665 | 0.051263 | 0.12194  | 0.045434  |
| Mus_musc Mus_musc | 0        | 0        | 0        | 0.322172 | 0        | 0         |
| Mus_musc Mus_musc | 0        | 0.208303 | 0        | 0.611219 | 0.29164  | 0.357103  |
| Mus_musc Mus_musc | 0.445872 | 0.52221  | 0.615142 | 0.209835 | 0.232411 | 0.201371  |
| Mus_musc Mus_musc | 0        | 0        | 0        | 0.174016 | 0        | 0.05894   |
| Mus_musc Mus_musc | 0        | 0        | 0        | 0        | 0        | 0         |
| Mus_musc Mus_musc | 0        | 0        | 0        | 0.454277 | 0.34611  | 0.358229  |
| ENSMUSG 4931417E1 | 0        | 0        | 0        | 0        | 0        | 0         |
| Mus_musc Mus_musc | 0        | 0        | 0        | 0        | 0        | 0         |
| Mus_musc Mus_musc | 0.182831 | 0.289837 | 0.709617 | 0.145507 | 0.473598 | 0.250574  |
| Mus_musc Mus_musc | 0.423419 | 0        | 0.030346 | 0.083785 | 0        | 0         |
| Mus_musc Mus_musc | 0        | 0.202177 | 0.206861 | 0        | 0        | 0         |
| Mus_musc Mus_musc | 0.832449 | 0.284968 | 0.627586 | 0.959278 | 0.848114 | 0.715114  |
| Mus_musc Mus_musc | 0        | 0        | 0        | 0        | 0        | 0         |

|                   |          |          |          |          |          |           |
|-------------------|----------|----------|----------|----------|----------|-----------|
| Mus_musc Mus_musc | 0.729159 | 0.808482 | 0.990083 | 0.561192 | 0.357849 | 0.400826  |
| ENSMUSG Psg16     | 0        | 0        | 0        | 0        | 0        | 0         |
| ENSMUSG Dync2h1   | 2.305565 | 2.549156 | 1.590134 | 2.187051 | 2.319781 | 2.113803  |
| ENSMUSG Gjd3      | 0.079751 | 0.046542 | 0        | 0.141583 | 0.066915 | 0.051493  |
| Mus_musc Mus_musc | 0        | 0        | 0.034901 | 0        | 0.341996 | 0.212118  |
| Mus_musc Mus_musc | 0        | 0        | 0        | 0.073684 | 0.272791 | 0         |
| Mus_musc Mus_musc | 0        | 0        | 0        | 0.264323 | 0.365849 | 0.254214  |
| Mus_musc Mus_musc | 0.028882 | 0        | 0.026844 | 0.659963 | 0.689326 | 0.767597  |
| Mus_musc Mus_musc | 0.317605 | 0.483229 | 0.239461 | 0.511658 | 0.515811 | 0.454158  |
| ENSMUSG Slc39a3   | 13.13774 | 12.82979 | 14.03012 | 9.833822 | 10.41829 | 10.083511 |
| ENSMUSG Fam187b   | 2.729169 | 3.071547 | 2.466538 | 1.610195 | 2.248705 | 1.897402  |
| Mus_musc Mus_musc | 0.189608 | 0.290878 | 0.435997 | 0.191624 | 0.112686 | 0.148452  |
| Mus_musc Mus_musc | 0        | 0        | 0        | 0        | 0        | 0.368372  |
| ENSMUSG Cd300ld2  | 0.270086 | 0.733767 | 0.330143 | 1.588958 | 0.852033 | 1.354532  |
| ENSMUSG Zfp966    | 1.683813 | 2.560113 | 1.38383  | 1.947761 | 1.341591 | 1.853013  |
| ENSMUSG Olfr1480  | 0        | 0        | 0        | 0        | 0        | 0         |
| ENSMUSG Vmn2r22   | 0        | 0        | 0        | 0        | 0        | 0         |
| ENSMUSG Olfr776   | 0        | 0        | 0        | 0        | 0        | 0         |
| ENSMUSG Timm8a2   | 0        | 0.091943 | 0.044778 | 0        | 0.089768 | 0.060521  |
| ENSMUSG Vmn1r121  | 0        | 0        | 0        | 0        | 0        | 0         |
| ENSMUSG Gm6902    | 0        | 0        | 0        | 0        | 0        | 0         |
| ENSMUSG Defa25    | 0        | 0        | 0        | 0        | 0        | 0         |
| ENSMUSG Ccl21a    | 27.90893 | 32.56129 | 35.32227 | 40.51342 | 30.67162 | 36.030468 |
| Mus_musc Mus_musc | 0.14016  | 0        | 0        | 0        | 0        | 0.232046  |
| Mus_musc Mus_musc | 0        | 0        | 0.022035 | 0.113068 | 0.250727 | 0         |
| ENSMUSG Dcaf12l2  | 0.069868 | 0.029899 | 0.031972 | 0.041257 | 0        | 0         |
| ENSMUSG Mkl2      | 9.319255 | 9.261156 | 7.765791 | 7.615536 | 8.16661  | 8.55886   |
| ENSMUSG Fpgs      | 7.992992 | 6.052455 | 6.759887 | 6.320256 | 6.075798 | 5.938854  |
| Mus_musc Mus_musc | 0        | 1.309295 | 0        | 0.021635 | 0        | 0         |
| ENSMUSG Tor2a     | 15.64021 | 14.60998 | 16.8177  | 23.67652 | 19.44664 | 20.809337 |
| Mus_musc Mus_musc | 1.086151 | 1.121109 | 1.173692 | 1.126625 | 1.050196 | 0.694     |
| Mus_musc Mus_musc | 0.214707 | 0        | 0        | 0        | 0        | 0         |
| Mus_musc Mus_musc | 0.596367 | 0.542247 | 0.665709 | 0.502137 | 0.813024 | 1.016138  |
| Mus_musc Mus_musc | 1.705319 | 0.828739 | 1.786555 | 2.501908 | 1.789119 | 1.767274  |
| Mus_musc Mus_musc | 2.184786 | 2.370244 | 0.968582 | 0.547837 | 1.716802 | 1.014892  |
| Mus_musc Mus_musc | 0        | 0.239168 | 0        | 0        | 0        | 0.224169  |
| Mus_musc Mus_musc | 0        | 0        | 0.118615 | 0.125661 | 0.108364 | 0.100511  |
| Mus_musc Mus_musc | 0.682681 | 0.640819 | 0.507463 | 0.52571  | 0.523069 | 0.579993  |
| Mus_musc Mus_musc | 0.220963 | 0.207489 | 0.276215 | 0        | 0.062442 | 0.250577  |
| Mus_musc Mus_musc | 0        | 0.27764  | 0        | 0        | 0        | 0.078837  |
| Mus_musc Mus_musc | 0        | 0        | 0.237211 | 0        | 0        | 0         |
| Mus_musc Mus_musc | 0.186935 | 0.229021 | 0.108964 | 0.10441  | 0.207073 | 0.303447  |
| ENSMUSG Gm42669   | 0.160507 | 0.057432 | 0.071947 | 0.18577  | 0.076028 | 0.123158  |
| Mus_musc Mus_musc | 0.276429 | 0.094676 | 0        | 0.103994 | 0        | 0.51807   |
| Mus_musc Mus_musc | 3.912274 | 5.020937 | 5.033084 | 3.935331 | 4.026152 | 3.049928  |
| ENSMUSG Olfr191   | 0        | 0        | 0        | 0        | 0        | 0         |
| ENSMUSG Gm4216    | 0        | 0        | 0        | 0        | 0        | 0         |
| ENSMUSG Olfr671   | 0        | 0        | 0        | 0        | 0        | 0         |
| ENSMUSG H2-K1     | 175.0858 | 158.2884 | 381.0588 | 331.3483 | 241.0847 | 306.47057 |
| ENSMUSG Eid1      | 27.33672 | 27.38567 | 24.55698 | 26.08164 | 22.86103 | 24.716883 |
| ENSMUSG Icos      | 0.769438 | 0.641186 | 0.683696 | 2.260932 | 2.065722 | 1.279112  |
| ENSMUSG Bik       | 7.386457 | 6.989256 | 7.478342 | 6.005407 | 6.311406 | 5.331678  |
| ENSMUSG Rgn       | 0.190957 | 0.45611  | 0.103969 | 0.217439 | 0.396039 | 0.368029  |
| ENSMUSG Ttll12    | 6.194748 | 5.769547 | 4.844649 | 5.437274 | 6.002528 | 6.179146  |
| ENSMUSG Cmah      | 4.692787 | 2.656413 | 2.502972 | 8.052596 | 11.07383 | 10.540218 |
| ENSMUSG Gm17087   | 0        | 0        | 0        | 0        | 0        | 0         |
| ENSMUSG Gm11983   | 0        | 0        | 0        | 0        | 0        | 0         |
| ENSMUSG Tcf4      | 27.01281 | 27.50273 | 24.49026 | 23.37739 | 22.27946 | 20.094298 |
| ENSMUSG Tnfaip6   | 0.343405 | 0.151873 | 0.244414 | 0.171777 | 0.357226 | 0.285004  |
| ENSMUSG Fam122c   | 0        | 0        | 0        | 0        | 0        | 0         |
| ENSMUSG Kdm3a     | 10.88197 | 11.88998 | 11.20836 | 9.796716 | 11.28279 | 9.64496   |
| Mus_musc Mus_musc | 0.150398 | 0.426896 | 0.606651 | 0.312699 | 0.280648 | 0.499867  |
| ENSMUSG Prss3     | 0        | 0        | 0        | 0        | 0        | 0         |
| Mus_musc Mus_musc | 0        | 0.075618 | 0.389024 | 0        | 0.103016 | 0         |

|                          |          |          |          |          |          |           |
|--------------------------|----------|----------|----------|----------|----------|-----------|
| Mus_musc Mus_musc        | 0        | 0        | 0        | 0.234387 | 0.118768 | 0         |
| ENSMUSG Hmga1b           | 9.309557 | 8.419741 | 10.09554 | 13.34673 | 13.69772 | 15.465554 |
| Mus_musc Mus_musc        | 0.241816 | 0.222952 | 0.285642 | 0.475675 | 0.479876 | 0.529034  |
| Mus_musc Mus_musc        | 0.371309 | 0.327269 | 0.219448 | 0.380792 | 0.089697 | 0.267835  |
| ENSMUSG Gm3550           | 0        | 0        | 0        | 0        | 0.028635 | 0.100101  |
| Mus_musc Mus_musc        | 0.972333 | 0.994883 | 0.836302 | 0.640129 | 1.532024 | 1.309923  |
| Mus_musc Mus_musc        | 0        | 0        | 0        | 0        | 0        | 0.274125  |
| Mus_musc Mus_musc        | 0        | 0.292068 | 0        | 0        | 0        | 0         |
| Mus_musc Mus_musc        | 0.191482 | 0        | 0.161497 | 0.150069 | 0.083412 | 0.249434  |
| Mus_musc Mus_musc        | 0        | 0        | 0        | 0        | 0.354578 | 0         |
| Mus_musc Mus_musc        | 0.746455 | 0.38646  | 0.236285 | 0.610717 | 0.466101 | 0.939149  |
| Mus_musc Mus_musc        | 0        | 0        | 0.254266 | 0        | 0        | 0         |
| Mus_musc Mus_musc        | 0.188031 | 0        | 0        | 0        | 0        | 0         |
| Mus_musc Mus_musc        | 0        | 0        | 0        | 0.201726 | 0.100833 | 0.210607  |
| ENSMUSG Gm21886          | 0        | 0        | 0        | 0        | 0        | 0         |
| ENSMUSG Gm10591          | 1.857264 | 1.968941 | 1.42743  | 2.880163 | 1.968723 | 2.038165  |
| ENSMUSG Vmn2r54          | 0        | 0        | 0        | 0        | 0        | 0         |
| ENSMUSG Gm13272          | 0.034778 | 0.02835  | 0.046556 | 0.015664 | 0        | 0.161816  |
| Mus_musc Mus_musc        | 1.106597 | 1.472069 | 1.319401 | 1.1883   | 0.624568 | 1.203556  |
| ENSMUSG Chfr             | 11.94662 | 11.64981 | 12.94153 | 12.72526 | 12.73633 | 11.775254 |
| ENSMUSG Stac2            | 0.580308 | 0.834329 | 0.796406 | 10.65161 | 11.54548 | 11.395398 |
| Mus_musc Mus_musc        | 0        | 0.096755 | 0.142162 | 0        | 0        | 0         |
| ENSMUSG Rpl19            | 436.6394 | 469.4095 | 464.5964 | 497.2982 | 473.5792 | 515.22802 |
| ENSMUSG Nek8             | 2.690945 | 2.826678 | 2.156417 | 2.613185 | 2.003071 | 2.628834  |
| ENSMUSG H2-T3            | 0.135472 | 0.010627 | 0.157975 | 0.035466 | 0        | 0         |
| ENSMUSG Actr5            | 4.745562 | 4.002322 | 3.976924 | 4.689481 | 3.682161 | 4.665517  |
| ENSMUSG Slc16a9          | 25.0493  | 20.34226 | 22.9405  | 17.82827 | 22.0297  | 14.507708 |
| ENSMUSG Brpf1            | 11.56692 | 12.47572 | 13.78031 | 10.1316  | 10.06659 | 10.568387 |
| ENSMUSG Stk38l           | 4.175642 | 5.151226 | 4.599213 | 4.673957 | 4.097754 | 4.944772  |
| ENSMUSG Cars             | 8.94193  | 8.788797 | 9.289869 | 10.12487 | 9.890773 | 10.277673 |
| ENSMUSG Tnfrsf22         | 1.409714 | 1.987624 | 2.101434 | 1.636699 | 1.376075 | 1.449323  |
| ENSMUSG Olfr1300- $\rho$ | 0        | 0        | 0        | 0        | 0        | 0         |
| ENSMUSG Olfr1328         | 0        | 0        | 0        | 0        | 0        | 0         |
| ENSMUSG Scarf2           | 24.96706 | 18.61036 | 24.27433 | 18.05861 | 19.52536 | 20.641153 |
| ENSMUSG Tpi1             | 62.72328 | 71.04852 | 60.4578  | 62.79041 | 64.07179 | 76.733229 |
| ENSMUSG Pisd             | 25.03167 | 25.41076 | 28.48345 | 26.28083 | 25.79036 | 31.198771 |
| ENSMUSG Lrrk1            | 16.78106 | 17.08329 | 15.25609 | 13.80631 | 14.1109  | 14.52137  |
| ENSMUSG Get4             | 28.7096  | 26.73602 | 28.67747 | 23.49453 | 21.57493 | 24.520054 |
| ENSMUSG Lhfpl5           | 0        | 0.133817 | 0.033391 | 0        | 0        | 0         |
| ENSMUSG Opcml            | 0.100522 | 0.109796 | 0.074593 | 0.188431 | 0.049581 | 0.089748  |
| ENSMUSG Fam20c           | 3.528634 | 3.189489 | 3.364499 | 18.90303 | 17.65125 | 22.381618 |
| ENSMUSG Prkar1b          | 12.31631 | 10.76633 | 13.67933 | 7.216484 | 7.497431 | 8.269747  |
| ENSMUSG Pdgfa            | 34.24217 | 26.92364 | 33.24069 | 23.04855 | 20.45227 | 23.171481 |
| ENSMUSG Dnaaf5           | 6.578975 | 5.727781 | 6.097445 | 6.130992 | 6.197618 | 6.485331  |
| ENSMUSG Pri7d1           | 0        | 0        | 0        | 0        | 0        | 0         |
| ENSMUSG Gpld1            | 1.143921 | 1.539556 | 1.082384 | 1.393066 | 0.966193 | 1.278813  |
| ENSMUSG Pri              | 0        | 0        | 0        | 0        | 0        | 0         |
| ENSMUSG Pri8a6           | 0        | 0        | 0        | 0        | 0        | 0         |
| ENSMUSG Pri8a8           | 0        | 0        | 0        | 0        | 0        | 0         |
| ENSMUSG Gm1993           | 0        | 0        | 0        | 0        | 0        | 0         |
| ENSMUSG Syap1            | 35.06174 | 35.7274  | 32.45768 | 30.69914 | 30.53453 | 30.386715 |
| ENSMUSG Amelx            | 0        | 0        | 0        | 0        | 0        | 0         |
| ENSMUSG Arhgap6          | 9.715554 | 8.607266 | 8.345449 | 7.151632 | 7.228153 | 7.157634  |
| ENSMUSG Hccs             | 7.34326  | 6.342271 | 7.144386 | 6.088236 | 6.094388 | 7.522944  |
| ENSMUSG Rbbp7            | 43.54138 | 46.8295  | 45.41478 | 43.67225 | 44.17833 | 43.741024 |
| ENSMUSG Zfp185           | 3.535288 | 3.498373 | 3.127345 | 2.570847 | 2.408959 | 3.059138  |
| ENSMUSG Msl3             | 14.33788 | 15.60757 | 14.88004 | 15.82723 | 16.72218 | 14.959476 |
| Mus_musc Mus_musc        | 1.659101 | 0.490915 | 2.098866 | 11.36395 | 19.7512  | 74.816612 |
| Mus_musc Mus_musc        | 0.74852  | 1.491515 | 0        | 3.821225 | 3.318796 | 21.662249 |
| Mus_musc Mus_musc        | 0        | 0.11966  | 0        | 0.892905 | 0.438706 | 1.766842  |
| Mus_musc Mus_musc        | 0.364402 | 0.535497 | 0        | 27.2266  | 6.183522 | 0.901894  |
| Mus_musc Mus_musc        | 7.525046 | 7.029817 | 5.782978 | 589.996  | 111.6672 | 105.61063 |
| Mus_musc Mus_musc        | 1.964904 | 2.700611 | 1.109159 | 203.2227 | 56.05244 | 234.23332 |
| Mus_musc Mus_musc        | 132.4727 | 138.3065 | 64.02913 | 17053.92 | 19250.81 | 15815.627 |

|          |           |          |          |          |          |          |           |
|----------|-----------|----------|----------|----------|----------|----------|-----------|
| Mus_musc | Mus_musc  | 0.232061 | 0.101172 | 0        | 1.142943 | 0.38676  | 1.757127  |
| Mus_musc | Mus_musc  | 0.224441 | 0        | 0        | 3.528418 | 6.762522 | 5.258835  |
| ENSMUSG  | Gm3604    | 0.538738 | 0.342731 | 0.621078 | 0.95631  | 0.357674 | 0.318156  |
| ENSMUSG  | Gm15093   | 0        | 0        | 0        | 0        | 0        | 0         |
| ENSMUSG  | Rhox4a2   | 0        | 0.030656 | 0        | 0        | 0        | 0         |
| ENSMUSG  | Nelfa     | 10.33884 | 9.968337 | 10.31103 | 8.891756 | 9.256279 | 8.363343  |
| ENSMUSG  | Rnf4      | 26.87837 | 28.64183 | 29.81509 | 25.7112  | 27.31457 | 27.582209 |
| ENSMUSG  | Nkx1-1    | 0        | 0        | 0        | 0        | 0        | 0         |
| ENSMUSG  | Man2b2    | 20.36568 | 17.56409 | 18.70488 | 22.75585 | 25.22796 | 27.555169 |
| ENSMUSG  | Smtn      | 18.31997 | 16.17317 | 18.65504 | 12.25699 | 13.11494 | 13.216355 |
| ENSMUSG  | Sesn1     | 14.17263 | 14.1726  | 12.77802 | 13.8776  | 13.85411 | 13.114564 |
| ENSMUSG  | Satb2     | 0.15553  | 0.263989 | 0.271526 | 0.281847 | 0.31199  | 0.199298  |
| ENSMUSG  | C87499    | 0        | 0        | 0        | 0        | 0        | 0         |
| ENSMUSG  | Tsr1      | 7.380665 | 8.119982 | 6.236009 | 9.310674 | 8.507955 | 9.306189  |
| ENSMUSG  | Adcy1     | 0.303605 | 0.280857 | 0.316595 | 0.305547 | 0.25038  | 0.325192  |
| ENSMUSG  | Pes1      | 20.55828 | 19.07032 | 19.01506 | 19.28175 | 19.06801 | 20.144596 |
| ENSMUSG  | Tcn2      | 140.0414 | 143.3762 | 143.2449 | 127.7132 | 166.3852 | 123.92741 |
| ENSMUSG  | Osbp2     | 0.167838 | 0.235249 | 0.112775 | 0.132859 | 0.248665 | 0.086226  |
| ENSMUSG  | Galnt14   | 0.025406 | 0        | 0        | 0        | 0        | 0         |
| ENSMUSG  | Myo1g     | 8.863433 | 6.735032 | 10.90481 | 16.25634 | 13.58622 | 18.147878 |
| ENSMUSG  | Gabrg2    | 0        | 0        | 0        | 0        | 0        | 0         |
| ENSMUSG  | Ndufs5    | 39.56228 | 42.93631 | 49.83623 | 47.20523 | 47.58412 | 44.237707 |
| ENSMUSG  | Ehd3      | 9.178519 | 8.669996 | 9.244164 | 5.051105 | 5.961399 | 5.569734  |
| ENSMUSG  | Tmem269   | 0.201909 | 0.197401 | 0.303838 | 0.123107 | 0.043446 | 0.128098  |
| ENSMUSG  | Svbp      | 14.95429 | 15.08631 | 19.46831 | 17.8019  | 18.43108 | 14.90997  |
| ENSMUSG  | Tfap2c    | 0        | 0.021195 | 0        | 0        | 0        | 0         |
| ENSMUSG  | P3h1      | 8.103356 | 7.385322 | 7.567891 | 6.238014 | 7.387774 | 6.893069  |
| ENSMUSG  | Rragc     | 32.80067 | 31.68577 | 32.46776 | 28.10467 | 32.50981 | 30.6972   |
| ENSMUSG  | Mycbp     | 8.991154 | 8.550641 | 8.144837 | 8.717648 | 8.547655 | 9.485665  |
| ENSMUSG  | Ermap     | 0.109406 | 0.052793 | 0.137866 | 0        | 0.051934 | 0.029261  |
| ENSMUSG  | Slc2a1    | 6.956327 | 7.416004 | 8.17385  | 9.484403 | 10.00161 | 9.999082  |
| ENSMUSG  | Txndc11   | 11.2037  | 10.79416 | 12.08319 | 20.64105 | 23.9513  | 21.149702 |
| ENSMUSG  | Glycam1   | 0        | 0.055532 | 0        | 0        | 0        | 0.074496  |
| ENSMUSG  | Ppp1r1a   | 1.323059 | 2.4042   | 1.181518 | 1.530969 | 1.327145 | 1.174364  |
| ENSMUSG  | Shisa9    | 0.374498 | 0.316145 | 0.146638 | 0.257772 | 0.106336 | 0.128028  |
| ENSMUSG  | Tnfrsf17  | 0.526027 | 0.279271 | 0.11753  | 4.467625 | 2.930955 | 3.668357  |
| ENSMUSG  | Fech      | 21.21256 | 21.2825  | 22.44867 | 16.78382 | 17.58905 | 17.536068 |
| ENSMUSG  | Dmac1     | 21.56348 | 20.2949  | 24.47294 | 22.39055 | 25.40477 | 23.562914 |
| ENSMUSG  | Ptprd     | 8.018084 | 6.511049 | 5.098917 | 3.913067 | 4.023993 | 3.809084  |
| ENSMUSG  | Pole3     | 17.58513 | 17.04558 | 18.12343 | 14.39984 | 15.03362 | 15.861511 |
| ENSMUSG  | Mob2      | 27.07907 | 32.49177 | 28.67454 | 23.38072 | 24.68543 | 20.7015   |
| ENSMUSG  | 2310002LC | 0.051662 | 0.337645 | 0.111923 | 0.027063 | 0.054682 | 0         |
| ENSMUSG  | Kdm4c     | 10.47657 | 11.10641 | 10.03989 | 8.141061 | 9.75779  | 7.959559  |
| ENSMUSG  | Aspcr1    | 20.94877 | 21.36823 | 20.38828 | 21.57834 | 20.18274 | 19.147436 |
| ENSMUSG  | Wdr31     | 1.95562  | 1.784937 | 0.993816 | 2.603914 | 1.689698 | 2.027553  |
| ENSMUSG  | Bspry     | 7.962173 | 8.6776   | 7.898111 | 9.060278 | 8.354248 | 9.3001    |
| ENSMUSG  | Alad      | 102.7021 | 103.9271 | 87.08535 | 77.04692 | 75.85132 | 86.041485 |
| ENSMUSG  | Acvr1b    | 18.33826 | 18.10633 | 20.10732 | 15.83947 | 16.77429 | 14.716119 |
| ENSMUSG  | Pla2g4e   | 0        | 0.076448 | 0        | 0.011661 | 0.03753  | 0.056774  |
| ENSMUSG  | Cadm1     | 50.36117 | 42.71902 | 47.16206 | 33.69253 | 34.65917 | 33.190971 |
| ENSMUSG  | Bud13     | 6.231676 | 5.089349 | 5.69111  | 4.266779 | 5.178157 | 5.152957  |
| ENSMUSG  | Prl3d2    | 0        | 0        | 0        | 0        | 0        | 0         |
| ENSMUSG  | Tcp10c    | 0        | 0.029179 | 0        | 0        | 0        | 0         |
| ENSMUSG  | Apoa5     | 0        | 0        | 0        | 0        | 0        | 0         |
| ENSMUSG  | Irf9      | 17.84813 | 15.09558 | 29.63504 | 19.18826 | 12.78602 | 15.421732 |
| ENSMUSG  | Ap2a1     | 23.23033 | 21.66311 | 23.41341 | 21.37389 | 21.80332 | 21.37999  |
| ENSMUSG  | Mrps18b   | 10.60816 | 11.20129 | 9.726613 | 11.26815 | 10.26055 | 12.111363 |
| ENSMUSG  | Nr3c1     | 40.6123  | 42.81707 | 35.90804 | 29.63872 | 29.93462 | 28.288154 |
| ENSMUSG  | Cabyr     | 0.048883 | 0.072122 | 0.202945 | 0.133758 | 0.060274 | 0.210894  |
| ENSMUSG  | Nrg2      | 1.188902 | 1.072847 | 0.701414 | 1.035168 | 0.986029 | 1.309711  |
| ENSMUSG  | Gmpr2     | 6.352516 | 6.543512 | 6.860369 | 7.081282 | 6.213751 | 6.49007   |
| ENSMUSG  | Tmem39b   | 3.346264 | 3.758544 | 4.679636 | 4.238735 | 3.831485 | 5.012266  |
| ENSMUSG  | Olf449    | 0        | 0        | 0        | 0        | 0        | 0         |
| ENSMUSG  | Fgfr4     | 10.90843 | 10.37182 | 12.51385 | 7.055245 | 6.36995  | 6.676197  |

|                   |          |          |          |          |          |           |
|-------------------|----------|----------|----------|----------|----------|-----------|
| ENSMUSG Zfp518a   | 4.088433 | 3.986894 | 3.856116 | 4.400726 | 4.399102 | 3.69179   |
| ENSMUSG Tex50     | 0        | 0        | 0        | 0        | 0.029445 | 0         |
| ENSMUSG Itgbl1    | 2.748728 | 1.782737 | 1.896137 | 1.471924 | 1.069635 | 1.371179  |
| ENSMUSG Odf4      | 0        | 0        | 0.044811 | 0.063117 | 0.060268 | 0.038956  |
| ENSMUSG Itk       | 2.132475 | 2.053634 | 2.491728 | 2.718472 | 2.267993 | 2.629044  |
| ENSMUSG Pax6      | 0        | 0        | 0.012361 | 0.008176 | 0        | 0         |
| ENSMUSG Med7      | 6.524464 | 8.386257 | 8.767483 | 7.636623 | 6.833839 | 7.767486  |
| ENSMUSG Ube2b     | 58.74013 | 60.21065 | 56.58881 | 60.4774  | 57.98406 | 54.527695 |
| ENSMUSG Cdkn2aipn | 21.43798 | 23.44029 | 21.30551 | 22.22883 | 23.84773 | 21.568939 |
| ENSMUSG Kremen1   | 12.89864 | 13.68571 | 12.74458 | 11.3851  | 11.5591  | 11.249936 |
| ENSMUSG Lin7c     | 29.95546 | 28.61678 | 26.03205 | 22.29047 | 22.16168 | 20.211828 |
| ENSMUSG Aadacl2   | 0        | 0        | 0        | 0        | 0        | 0         |
| ENSMUSG Ccdc34    | 3.078856 | 3.191502 | 2.875187 | 4.151881 | 4.189425 | 3.105643  |
| ENSMUSG Dnajc24   | 8.663216 | 7.382526 | 7.881565 | 7.9297   | 6.82966  | 7.261867  |
| ENSMUSG Havcr2    | 3.747361 | 3.461836 | 4.611814 | 4.845272 | 4.362055 | 5.224804  |
| ENSMUSG Traf6     | 8.685382 | 8.594231 | 8.381892 | 7.268341 | 8.373101 | 8.340213  |
| ENSMUSG B230118H  | 2.986043 | 3.484289 | 3.283648 | 3.64034  | 2.945908 | 3.087828  |
| ENSMUSG Ptpn7     | 3.077287 | 2.889324 | 4.505443 | 10.35439 | 10.45216 | 11.136238 |
| ENSMUSG Nox4      | 17.81437 | 17.74113 | 18.2075  | 11.37537 | 12.46538 | 9.45702   |
| ENSMUSG Ctsc      | 117.3055 | 119.2031 | 129.6269 | 154.6702 | 165.9095 | 178.75108 |
| ENSMUSG Six5      | 3.949473 | 3.434113 | 4.109076 | 3.481017 | 3.03209  | 3.365396  |
| ENSMUSG Map3k11   | 41.61678 | 42.35341 | 45.91888 | 35.09987 | 35.46349 | 33.298847 |
| ENSMUSG Akt2      | 22.42998 | 25.76    | 23.98632 | 25.55738 | 22.97952 | 23.555782 |
| Mus_musc Mus_musc | 0.38526  | 0        | 0        | 0.333846 | 0.027395 | 0.294298  |
| Mus_musc Mus_musc | 0        | 0.051289 | 0.228959 | 0        | 0.07917  | 0         |
| Mus_musc Mus_musc | 0.933903 | 0.902262 | 0.819618 | 0.845277 | 0.910034 | 0.920115  |
| Mus_musc Mus_musc | 0        | 0        | 0        | 0.373987 | 0        | 0         |
| ENSMUSG Chn2      | 4.229577 | 2.960838 | 3.685122 | 4.04941  | 4.993399 | 4.278272  |
| Mus_musc Mus_musc | 0.410132 | 0.435733 | 0.277217 | 0.533158 | 0.654326 | 0.656707  |
| Mus_musc Mus_musc | 0.562829 | 0.596861 | 0.376661 | 0.257438 | 0.34151  | 0.399044  |
| Mus_musc Mus_musc | 0.114189 | 0.055914 | 0        | 0.354373 | 0.373385 | 0         |
| ENSMUSG Duxbl3    | 0.048501 | 0        | 0        | 0.060088 | 0.028771 | 0.04119   |
| ENSMUSG Gm10392   | 0.034821 | 0.147977 | 0.173118 | 0.075871 | 0.052307 | 0.019755  |
| ENSMUSG Atp7b     | 14.15222 | 14.23269 | 11.42989 | 8.823676 | 8.505106 | 7.661964  |
| ENSMUSG Duxbl2    | 0        | 0.021387 | 0.022442 | 0.074937 | 0.050323 | 0.03748   |
| ENSMUSG Tmem254   | 0.783727 | 0.854385 | 0.896187 | 1.818527 | 1.615963 | 1.461985  |
| ENSMUSG Sec14l2   | 10.91522 | 13.52153 | 10.90498 | 11.17278 | 12.80315 | 13.922968 |
| ENSMUSG Rnf215    | 25.04959 | 21.18033 | 23.02103 | 16.02405 | 17.27649 | 15.726586 |
| ENSMUSG Slc10a5   | 1.064295 | 1.084224 | 0.711078 | 0.926226 | 0.925705 | 0.957099  |
| ENSMUSG Ccdc192   | 0        | 0.159945 | 0.033854 | 0.062701 | 0        | 0         |
| ENSMUSG Gm10053   | 1.674253 | 1.624435 | 2.846738 | 2.152178 | 2.928847 | 2.734457  |
| ENSMUSG Cdc42     | 174.4878 | 168.6681 | 175.8569 | 164.1729 | 160.6193 | 162.40218 |
| ENSMUSG Bglap3    | 0        | 0        | 0        | 0.067367 | 0        | 0         |
| ENSMUSG Bglap2    | 0        | 0        | 0        | 0        | 0        | 0         |
| ENSMUSG Mex3a     | 0.386054 | 0.536344 | 0.341966 | 0.415103 | 0.515746 | 0.552878  |
| ENSMUSG Bglap     | 0        | 0        | 0        | 0.188413 | 0        | 0.04814   |
| ENSMUSG C530025N  | 0        | 0        | 0        | 0        | 0        | 0         |
| ENSMUSG Syndig1   | 0        | 0        | 0        | 0        | 0        | 0         |
| ENSMUSG Gm21994   | 0.102088 | 0        | 0.048207 | 0        | 0.109753 | 0         |
| ENSMUSG Drc1      | 3.898438 | 5.462492 | 3.000036 | 5.770808 | 5.413134 | 5.871449  |
| ENSMUSG Zfp950    | 5.572915 | 6.699275 | 6.108727 | 5.469894 | 5.257695 | 5.802348  |
| ENSMUSG Zfp345    | 0.036726 | 0        | 0        | 0        | 0        | 0.01408   |
| ENSMUSG Gm10750   | 0        | 0        | 0        | 0        | 0        | 0         |
| ENSMUSG Fndc10    | 1.695622 | 1.558745 | 2.13649  | 3.730939 | 3.048407 | 3.224378  |
| ENSMUSG Cenpc1    | 4.032632 | 4.414541 | 3.123202 | 5.072309 | 4.163906 | 4.693287  |
| ENSMUSG Polr2b    | 18.45489 | 18.80312 | 16.27422 | 16.11819 | 16.09031 | 16.064318 |
| ENSMUSG Stap1     | 0.88321  | 0.438469 | 1.050118 | 2.412618 | 1.451888 | 2.145874  |
| ENSMUSG Gnrhr     | 0        | 0        | 0        | 0        | 0        | 0         |
| ENSMUSG Olfr1507  | 0        | 0        | 0        | 0        | 0        | 0         |
| ENSMUSG Elf3      | 8.49106  | 9.940177 | 6.711716 | 14.74152 | 15.05386 | 14.615189 |
| ENSMUSG Cyp2c29   | 0        | 0        | 0        | 0        | 0        | 0         |
| Mus_musc Mus_musc | 0.194281 | 0.512432 | 0.388407 | 0.447362 | 0.151081 | 0.262705  |
| Mus_musc Mus_musc | 0.253968 | 0        | 0.404392 | 0.134714 | 0.050487 | 0         |
| Mus_musc Mus_musc | 0.56244  | 0.444375 | 0.336882 | 0        | 0.228849 | 0.525552  |



|                   |          |          |          |          |          |           |
|-------------------|----------|----------|----------|----------|----------|-----------|
| ENSMUSG Inmt      | 1433.515 | 1309.22  | 1604.558 | 802.0161 | 718.1932 | 662.88452 |
| Mus_musc Mus_musc | 2.954997 | 2.646852 | 3.276436 | 2.070794 | 2.414221 | 2.163547  |
| Mus_musc Mus_musc | 0.155183 | 0.106295 | 0.333711 | 0.344202 | 0.171994 | 0.455187  |
| Mus_musc Mus_musc | 0        | 0        | 0        | 0        | 0.496132 | 0.237128  |
| Mus_musc Mus_musc | 0        | 0        | 0        | 0        | 0.373431 | 0         |
| Mus_musc Mus_musc | 0        | 0        | 0        | 0.521338 | 0        | 0         |
| Mus_musc Mus_musc | 0.151342 | 0.162016 | 0.413021 | 0.117223 | 0.17043  | 0.177982  |
| Mus_musc Mus_musc | 0        | 0        | 0        | 0.420738 | 0        | 0.103447  |
| ENSMUSG Hist1h2ac | 0.190683 | 0.231961 | 0.264226 | 0.073126 | 0.137199 | 0.238878  |
| ENSMUSG Hist1h2ae | 0.644488 | 0.290535 | 0.364749 | 0.555294 | 1.059956 | 0.923809  |
| ENSMUSG Hist1h3e  | 0        | 0        | 0        | 0.052246 | 0.066995 | 0.196083  |
| ENSMUSG Hist1h4f  | 0.124072 | 0        | 0        | 0        | 0.40824  | 0.022611  |
| ENSMUSG O610009B  | 10.43032 | 10.41969 | 11.54935 | 13.44079 | 12.71176 | 13.69149  |
| ENSMUSG Rbm12b1   | 4.770608 | 4.664081 | 4.275658 | 4.664165 | 3.9688   | 4.541542  |
| ENSMUSG Cxxc5     | 6.103198 | 5.403748 | 5.822979 | 5.721156 | 4.864277 | 5.726643  |
| ENSMUSG Rundc1    | 11.36192 | 10.25578 | 9.784631 | 10.17781 | 9.910833 | 9.910294  |
| ENSMUSG Igsf6     | 3.891948 | 3.660216 | 7.786015 | 10.16102 | 7.951634 | 9.98154   |
| ENSMUSG Dpp4      | 33.54616 | 34.33815 | 31.79212 | 24.82051 | 22.91964 | 23.863045 |
| ENSMUSG Gm10837   | 0        | 0        | 0        | 0        | 0        | 0         |
| ENSMUSG Dnlz      | 6.894552 | 5.29079  | 5.442381 | 5.789396 | 6.680467 | 6.569146  |
| ENSMUSG Pou2f2    | 1.178085 | 0.96724  | 1.488598 | 3.110736 | 2.987505 | 2.530092  |
| Mus_musc Mus_musc | 0.104077 | 0        | 0        | 0        | 0        | 0.122338  |
| Mus_musc Mus_musc | 0        | 0.184934 | 0.26562  | 0.192221 | 0.105409 | 0.177386  |
| Mus_musc Mus_musc | 1.463485 | 1.068393 | 1.006546 | 1.764186 | 1.147235 | 1.222561  |
| Mus_musc Mus_musc | 0        | 0.178784 | 0        | 0        | 0        | 0         |
| ENSMUSG Emc10     | 45.43714 | 45.34381 | 44.58485 | 41.50887 | 41.14278 | 43.720125 |
| ENSMUSG Evc2      | 4.09891  | 4.324582 | 3.924218 | 2.687191 | 2.286878 | 2.82659   |
| ENSMUSG Faf1      | 7.616304 | 7.881636 | 6.644015 | 7.651531 | 7.215024 | 8.249095  |
| ENSMUSG Il11ra2   | 0.243182 | 0.229702 | 0.555132 | 0.019095 | 0.06592  | 0.28825   |
| ENSMUSG Pax3      | 0        | 0        | 0        | 0        | 0        | 0         |
| ENSMUSG Aarsd1    | 11.46712 | 10.92923 | 11.83314 | 10.26619 | 10.5973  | 10.830907 |
| Mus_musc Mus_musc | 0        | 0.179385 | 0.342096 | 0        | 0        | 0.193522  |
| Mus_musc Mus_musc | 0.151216 | 0.311115 | 0.711008 | 0.154306 | 0.063439 | 0.346318  |
| ENSMUSG Lhfp12    | 2.632051 | 2.702827 | 2.420203 | 15.44734 | 16.74761 | 22.54276  |
| ENSMUSG Sowahb    | 1.107457 | 1.455295 | 0.989706 | 1.866792 | 1.6196   | 1.789299  |
| ENSMUSG Fahd1     | 4.347956 | 4.768083 | 3.690733 | 5.357524 | 4.32675  | 4.882499  |
| Mus_musc Mus_musc | 0        | 0.331291 | 0        | 0.172115 | 0        | 0         |
| ENSMUSG Adra2c    | 0.117022 | 0        | 0.091652 | 0        | 0.016258 | 0.016039  |
| Mus_musc Mus_musc | 0        | 0        | 0        | 0        | 0.324682 | 0         |
| Mus_musc Mus_musc | 0        | 0        | 0        | 0.174016 | 0.121819 | 0         |
| ENSMUSG Mustn1    | 12.35744 | 10.40108 | 12.65853 | 12.51016 | 11.36716 | 11.364336 |
| ENSMUSG Mgat3     | 8.176531 | 10.75248 | 6.383396 | 10.34615 | 9.686764 | 10.350872 |
| ENSMUSG Acp5      | 12.73518 | 10.50006 | 11.47318 | 73.00114 | 85.15592 | 82.499275 |
| ENSMUSG Cnn1      | 9.996516 | 11.79491 | 9.975734 | 11.30994 | 12.98666 | 10.360518 |
| ENSMUSG Bcor      | 10.33562 | 10.01658 | 10.40315 | 8.278712 | 8.163199 | 8.484935  |
| ENSMUSG Lrrd1     | 0.008347 | 0.075037 | 0.035951 | 0.059912 | 0.016322 | 0.083948  |
| ENSMUSG Trim41    | 15.16687 | 13.06316 | 13.8346  | 12.46609 | 11.88502 | 11.364285 |
| ENSMUSG Sec1      | 3.292083 | 2.682054 | 2.190337 | 3.741248 | 3.700475 | 4.218051  |
| ENSMUSG Cdc23     | 12.14466 | 13.54356 | 13.14335 | 13.1727  | 12.78681 | 11.439318 |
| ENSMUSG C2        | 15.48086 | 17.3765  | 11.71749 | 11.59713 | 7.645551 | 16.572964 |
| ENSMUSG Epb41l4a  | 10.50456 | 10.17077 | 9.302076 | 6.49774  | 6.05546  | 6.306431  |
| ENSMUSG Ctla2b    | 12.94523 | 10.66101 | 13.73837 | 6.406529 | 7.298111 | 6.028246  |
| ENSMUSG Stard4    | 11.94483 | 12.39535 | 11.46237 | 12.29522 | 12.6611  | 14.120722 |
| ENSMUSG Tslp      | 2.388467 | 2.22008  | 3.546159 | 1.474965 | 1.549082 | 1.147647  |
| ENSMUSG Fam50a    | 22.33139 | 21.6554  | 24.98174 | 20.30245 | 23.49813 | 19.873137 |
| ENSMUSG Flywch1   | 30.22874 | 26.34486 | 29.97236 | 20.04717 | 19.96973 | 21.124725 |
| ENSMUSG Emd       | 27.84793 | 27.47361 | 27.62111 | 20.54836 | 21.50584 | 22.248531 |
| ENSMUSG Rufy4     | 1.393167 | 1.525606 | 1.392167 | 0.940674 | 0.707538 | 0.274922  |
| ENSMUSG Myl1      | 0.454864 | 6.597895 | 0.470619 | 2.889061 | 1.624349 | 1.335906  |
| ENSMUSG Sgsh      | 9.299677 | 7.933404 | 7.962915 | 10.09548 | 9.373474 | 10.645959 |
| ENSMUSG Zbtb26    | 1.547532 | 1.780383 | 1.347643 | 1.903477 | 1.483617 | 1.640414  |
| ENSMUSG Lair1     | 2.637978 | 2.354879 | 4.107488 | 3.093324 | 3.833839 | 4.85553   |
| ENSMUSG Epha6     | 0        | 0        | 0        | 0        | 0        | 0         |
| ENSMUSG Scg2      | 0.153298 | 0.151426 | 0        | 0        | 0.022269 | 0.043941  |

|          |           |          |          |          |          |          |           |
|----------|-----------|----------|----------|----------|----------|----------|-----------|
| Mus_musc | Mus_musc  | 0        | 0.102468 | 0        | 0.192286 | 0.196002 | 0         |
| Mus_musc | Mus_musc  | 0        | 0        | 0        | 0        | 0        | 0         |
| Mus_musc | Mus_musc  | 0.479595 | 0.419561 | 0.352442 | 0.218432 | 0.065974 | 0.156885  |
| Mus_musc | Mus_musc  | 0        | 0        | 0.15677  | 0.224461 | 0        | 0.559595  |
| Mus_musc | Mus_musc  | 0.358918 | 0.62594  | 0.690867 | 0.384127 | 0.409748 | 0.676032  |
| Mus_musc | Mus_musc  | 0        | 0        | 0        | 0.125292 | 0.299241 | 0         |
| Mus_musc | Mus_musc  | 0        | 0.09559  | 0        | 0        | 0.186692 | 0         |
| Mus_musc | Mus_musc  | 0        | 0        | 0        | 0        | 0.305219 | 0         |
| Mus_musc | Mus_musc  | 0        | 0        | 0        | 0        | 0.186692 | 0         |
| Mus_musc | Mus_musc  | 1.037617 | 1.356457 | 1.11176  | 1.235668 | 1.193593 | 1.031284  |
| Mus_musc | Mus_musc  | 0        | 0        | 0        | 0        | 0        | 0.181592  |
| Mus_musc | Mus_musc  | 0        | 0        | 0        | 0        | 0        | 0.184186  |
| Mus_musc | Mus_musc  | 0        | 0        | 0.20262  | 0        | 0.185124 | 0.136979  |
| Mus_musc | Mus_musc  | 0.43041  | 0.205858 | 0.4905   | 0.529125 | 0.860114 | 1.15608   |
| ENSMUSG  | Cdh24     | 0.267954 | 0.257049 | 0.363849 | 0.336012 | 0.331059 | 0.410605  |
| ENSMUSG  | Ccdc7b    | 0        | 0        | 0        | 0        | 0        | 0         |
| ENSMUSG  | Zfp709    | 1.309811 | 1.253777 | 1.219704 | 1.239    | 1.106191 | 1.550018  |
| ENSMUSG  | Olfml1    | 8.179759 | 6.835824 | 5.453881 | 6.04275  | 6.251479 | 5.735461  |
| ENSMUSG  | Gprc5c    | 3.276657 | 3.181952 | 2.683557 | 2.861153 | 3.356022 | 3.292749  |
| ENSMUSG  | P4ha3     | 0.485409 | 0.610767 | 0.737007 | 0.850365 | 0.539597 | 0.769198  |
| ENSMUSG  | A430033Kl | 2.256377 | 2.401795 | 2.010252 | 1.77831  | 1.680733 | 1.752141  |
| ENSMUSG  | Mfsd9     | 1.747661 | 1.321615 | 1.672168 | 1.376462 | 1.450162 | 1.877656  |
| ENSMUSG  | Tango6    | 1.962943 | 1.927938 | 2.086566 | 1.799739 | 1.596391 | 1.734041  |
| Mus_musc | Mus_musc  | 0.168965 | 0.59552  | 0.590834 | 0.29099  | 0.230265 | 0.131217  |
| Mus_musc | Mus_musc  | 0.566076 | 0.236851 | 0.178952 | 0        | 0.157422 | 0.448939  |
| Mus_musc | Mus_musc  | 0        | 0        | 0        | 0        | 0        | 0         |
| ENSMUSG  | Unc13d    | 16.16715 | 14.70785 | 15.71035 | 13.03759 | 12.19049 | 14.097322 |
| Mus_musc | Mus_musc  | 0.062282 | 0.139361 | 0        | 0.189995 | 0.137315 | 0.316875  |
| Mus_musc | Mus_musc  | 0.887468 | 0.749101 | 1.13919  | 0.421361 | 0.840615 | 0.745216  |
| Mus_musc | Mus_musc  | 0.531128 | 0        | 0.261083 | 0        | 0        | 0         |
| Mus_musc | Mus_musc  | 0.35079  | 0        | 0.110353 | 0.084669 | 0.140521 | 0         |
| Mus_musc | Mus_musc  | 0        | 0        | 0        | 0        | 0        | 0.368372  |
| Mus_musc | Mus_musc  | 0        | 0.33336  | 0        | 0        | 0        | 0         |
| Mus_musc | Mus_musc  | 0        | 0        | 0        | 0.298313 | 0        | 0.092093  |
| Mus_musc | Mus_musc  | 0.746412 | 1.173091 | 1.287555 | 0.661454 | 0.425989 | 0         |
| Mus_musc | Mus_musc  | 0.297191 | 0        | 0.392183 | 0        | 0        | 0         |
| Mus_musc | Mus_musc  | 0        | 0        | 0        | 0.274908 | 0        | 0         |
| Mus_musc | Mus_musc  | 0        | 0        | 0        | 0.172709 | 0.117297 | 0.325957  |
| Mus_musc | Mus_musc  | 0        | 0        | 0        | 0.055675 | 0        | 0         |
| Mus_musc | Mus_musc  | 0        | 0.247074 | 0        | 0.228475 | 0.363873 | 0.152818  |
| Mus_musc | Mus_musc  | 0.278639 | 0        | 0.084468 | 0.274938 | 0.314471 | 0.272745  |
| Mus_musc | Mus_musc  | 0.066989 | 0.070141 | 0        | 0        | 0        | 0.29868   |
| Mus_musc | Mus_musc  | 0.114761 | 0        | 0        | 0.426309 | 0.434179 | 0.311282  |
| Mus_musc | Mus_musc  | 0        | 0        | 0        | 0        | 0.15888  | 0         |
| Mus_musc | Mus_musc  | 0        | 0.070524 | 0        | 0        | 0        | 0         |
| ENSMUSG  | Med18     | 2.724201 | 1.944924 | 2.835134 | 1.730417 | 1.993122 | 2.46879   |
| ENSMUSG  | Phactr4   | 16.97717 | 16.73026 | 16.37606 | 11.49128 | 12.51678 | 11.790338 |
| ENSMUSG  | Taar7d    | 0        | 0        | 0        | 0        | 0        | 0         |
| ENSMUSG  | Skap1     | 3.967628 | 2.940469 | 4.780973 | 5.42746  | 4.377189 | 4.99767   |
| ENSMUSG  | Inca1     | 1.069814 | 0.742652 | 0.610997 | 0.449756 | 0.677026 | 0.878294  |
| ENSMUSG  | Noc2l     | 11.21379 | 12.09251 | 13.76478 | 12.81252 | 11.01004 | 12.888315 |
| ENSMUSG  | Olfrc397  | 0        | 0        | 0        | 0        | 0        | 0         |
| ENSMUSG  | Ube2d1    | 15.95902 | 16.23407 | 18.34644 | 15.52781 | 14.5303  | 13.243711 |
| ENSMUSG  | Tdpoz2    | 0        | 0        | 0        | 0        | 0        | 0         |
| ENSMUSG  | Olfrc342  | 0        | 0        | 0        | 0        | 0        | 0         |
| ENSMUSG  | Olfrc347  | 0        | 0        | 0        | 0        | 0        | 0         |
| ENSMUSG  | Flvcr1    | 6.11252  | 6.61584  | 5.785139 | 7.252485 | 8.19502  | 7.743163  |
| ENSMUSG  | Xlr       | 3.759976 | 4.898283 | 4.587276 | 4.884002 | 5.033636 | 4.198357  |
| ENSMUSG  | Mrpl19    | 2.501808 | 2.259325 | 2.648798 | 3.212296 | 2.657647 | 2.925087  |
| Mus_musc | Mus_musc  | 0        | 0        | 0        | 0.353031 | 0        | 0         |
| ENSMUSG  | Sptbn2    | 1.361563 | 1.501338 | 1.000604 | 1.19524  | 1.019753 | 1.168853  |
| Mus_musc | Mus_musc  | 0.124786 | 0.070339 | 0.05644  | 0.154013 | 0.322007 | 0.342611  |
| Mus_musc | Mus_musc  | 0        | 0.047631 | 0        | 0.109204 | 0        | 0         |
| Mus_musc | Mus_musc  | 0.224766 | 0.252307 | 0.369009 | 0.657028 | 1.393852 | 0.886305  |

|                   |          |          |          |          |          |           |
|-------------------|----------|----------|----------|----------|----------|-----------|
| ENSMUSG Casp16-ps | 0        | 0        | 0        | 0        | 0        | 0         |
| Mus_musc Mus_musc | 0.051494 | 0.064465 | 0        | 0.52233  | 0.20285  | 0.635177  |
| Mus_musc Mus_musc | 0        | 0        | 0        | 0        | 0.063936 | 0         |
| ENSMUSG Ss18      | 32.73294 | 37.92799 | 38.13717 | 34.87686 | 29.37996 | 35.121634 |
| ENSMUSG Cd300lg   | 3.348634 | 3.41856  | 3.069857 | 2.303106 | 1.831391 | 2.016747  |
| ENSMUSG Mcpt4     | 0.661686 | 0.943757 | 2.442109 | 0.485769 | 1.022936 | 0.331972  |
| ENSMUSG Bbc3      | 6.143243 | 8.01019  | 11.395   | 9.01833  | 7.857434 | 8.915987  |
| ENSMUSG H2a1o     | 0        | 0        | 0        | 0        | 0        | 0         |
| ENSMUSG Acot8     | 10.59517 | 9.374097 | 11.48647 | 9.030544 | 9.237633 | 11.096068 |
| ENSMUSG Apln      | 14.33207 | 11.61465 | 14.90512 | 7.160469 | 5.864031 | 6.940938  |
| ENSMUSG Cstf2t    | 11.42048 | 11.5869  | 10.97855 | 10.11614 | 11.15858 | 9.657646  |
| ENSMUSG Tnnc2     | 0        | 0        | 0        | 0.073584 | 0.14722  | 0         |
| ENSMUSG Ctsb      | 78.2949  | 77.94308 | 79.15663 | 246.9028 | 259.0432 | 315.61487 |
| ENSMUSG Pspc1     | 5.300421 | 3.844589 | 4.595648 | 3.854569 | 4.181255 | 5.002418  |
| ENSMUSG Mapk8     | 5.323396 | 4.625767 | 4.774232 | 4.155492 | 4.000649 | 3.978453  |
| ENSMUSG Gucy1b2   | 0        | 0        | 0        | 0        | 0        | 0         |
| ENSMUSG Rnaseh2b  | 5.429817 | 4.873972 | 4.334183 | 4.556102 | 5.62593  | 4.81504   |
| ENSMUSG Spryd7    | 7.362515 | 7.066473 | 7.590776 | 6.045683 | 5.403091 | 5.340537  |
| ENSMUSG Capn12    | 0        | 0        | 0.02585  | 0.009189 | 0        | 0         |
| ENSMUSG Fbxw28    | 0        | 0        | 0        | 0        | 0        | 0         |
| ENSMUSG Olfr1084  | 0        | 0        | 0        | 0        | 0        | 0         |
| ENSMUSG Phospho2  | 7.186071 | 8.485859 | 8.112557 | 8.748326 | 7.615246 | 6.800637  |
| ENSMUSG Arid2     | 12.36424 | 13.08587 | 10.93467 | 10.24705 | 11.18043 | 9.769878  |
| ENSMUSG Dnah7a    | 0.502272 | 0.519237 | 0.278624 | 0.564426 | 0.546729 | 0.482388  |
| ENSMUSG Alx1      | 0        | 0.017216 | 0.005542 | 0        | 0        | 0         |
| ENSMUSG Trim45    | 1.156794 | 0.941104 | 0.692265 | 0.943487 | 0.867398 | 0.973131  |
| ENSMUSG Vkorc1    | 33.56675 | 31.84911 | 35.64756 | 30.46272 | 30.76377 | 28.991482 |
| ENSMUSG Uck1      | 16.52567 | 16.62948 | 18.40511 | 18.0021  | 16.7265  | 19.275709 |
| ENSMUSG Plxnb2    | 44.15606 | 45.64839 | 41.18937 | 53.73842 | 56.1157  | 60.437801 |
| ENSMUSG Fut2      | 0.317713 | 0.20585  | 0.220074 | 0.649307 | 0.760334 | 1.572132  |
| ENSMUSG Cldn23    | 2.269403 | 3.160585 | 1.96955  | 2.41777  | 1.782569 | 1.703125  |
| ENSMUSG Olfr378   | 0        | 0        | 0        | 0        | 0        | 0         |
| ENSMUSG Lonp2     | 26.04436 | 26.42505 | 26.96804 | 24.1066  | 24.62427 | 23.511143 |
| ENSMUSG Gm27029   | 0.066931 | 0.292105 | 0.147087 | 0.167554 | 0.167261 | 0.141471  |
| ENSMUSG Rpf2      | 3.987447 | 3.991331 | 4.607849 | 5.781678 | 6.154212 | 3.969507  |
| ENSMUSG Disp1     | 1.723293 | 2.088273 | 1.651119 | 1.931032 | 2.190807 | 2.657051  |
| ENSMUSG Slc5a11   | 0        | 0        | 0.006557 | 0        | 0        | 0         |
| ENSMUSG Grtp1     | 11.59491 | 9.753751 | 16.38818 | 7.130462 | 6.25627  | 4.138581  |
| ENSMUSG Arhgap17  | 16.07725 | 15.66707 | 16.93786 | 18.04982 | 18.41229 | 17.932022 |
| ENSMUSG Jarid2    | 6.218232 | 6.311502 | 6.543638 | 6.578598 | 6.307253 | 6.246262  |
| ENSMUSG Acer3     | 4.352814 | 5.256119 | 5.251062 | 5.095479 | 5.099016 | 5.154901  |
| ENSMUSG Myo7a     | 2.674433 | 2.308027 | 2.438615 | 3.022937 | 3.664536 | 3.237244  |
| ENSMUSG Aqp8      | 0        | 0.030613 | 0        | 0.046576 | 0        | 0         |
| ENSMUSG Lcmt1     | 9.528824 | 9.056117 | 9.097942 | 10.79244 | 8.564256 | 8.723232  |
| ENSMUSG Dnph1     | 0.389178 | 1.113101 | 0.662896 | 0.740958 | 0.982096 | 1.271104  |
| ENSMUSG Gm6526    | 0        | 0        | 0        | 0        | 0        | 0         |
| ENSMUSG Itgav     | 11.46171 | 11.47429 | 10.4312  | 10.25697 | 10.64053 | 10.802744 |
| ENSMUSG Plcb1     | 6.971644 | 6.095553 | 4.972934 | 3.669489 | 3.880264 | 2.669071  |
| ENSMUSG Gm17669   | 0        | 0.112828 | 0.049773 | 0        | 0        | 0.01624   |
| ENSMUSG Apol11b   | 0.255411 | 0.058011 | 2.701841 | 0.449823 | 0.176067 | 0.197872  |
| ENSMUSG Oas1e     | 0        | 0        | 0        | 0.022803 | 0        | 0         |
| ENSMUSG Oas1g     | 0        | 0        | 0        | 0        | 0        | 0         |
| ENSMUSG Gm9008    | 0.047787 | 0.009837 | 0        | 0        | 0.020788 | 0.021526  |
| ENSMUSG 1700024G  | 3.077743 | 5.259949 | 2.675452 | 7.788348 | 6.132185 | 6.760501  |
| ENSMUSG Dlx2      | 0        | 0        | 0        | 0        | 0        | 0         |
| ENSMUSG Slc17a9   | 1.024792 | 1.192183 | 0.905052 | 2.585039 | 2.926283 | 3.758857  |
| ENSMUSG Xlr5b     | 0        | 0        | 0        | 0        | 0        | 0         |
| ENSMUSG Stox1     | 1.451536 | 1.420927 | 1.160592 | 1.249212 | 1.28138  | 1.305681  |
| ENSMUSG Krr1      | 9.075803 | 8.691506 | 8.683017 | 8.387736 | 7.412604 | 6.812165  |
| ENSMUSG Cd209d    | 0.254528 | 0.233059 | 0.162135 | 2.138751 | 4.878277 | 3.845063  |
| ENSMUSG Cd209a    | 2.742696 | 3.573061 | 2.375138 | 3.583359 | 5.396442 | 4.481369  |
| ENSMUSG Tnfsf13b  | 3.561274 | 3.705397 | 5.053638 | 6.391353 | 8.271682 | 5.564619  |
| ENSMUSG Chrna6    | 0        | 0        | 0        | 0        | 0        | 0         |
| ENSMUSG Eif4ebp1  | 11.46888 | 13.1832  | 14.37996 | 13.69996 | 13.37931 | 11.874249 |

|                   |          |          |          |          |          |           |
|-------------------|----------|----------|----------|----------|----------|-----------|
| ENSMUSG Ggn       | 0.231407 | 0.165273 | 0.2481   | 0.337669 | 0.121869 | 0.371519  |
| ENSMUSG Chrn3     | 0        | 0        | 0        | 0        | 0        | 0         |
| ENSMUSG Cntn1     | 0.756469 | 0.782658 | 0.7288   | 1.047135 | 1.269646 | 0.500431  |
| ENSMUSG Gabrg3    | 0        | 0        | 0        | 0        | 0        | 0         |
| ENSMUSG Smyd1     | 0.390049 | 1.768674 | 0.324351 | 1.040682 | 1.106897 | 0.691534  |
| ENSMUSG Ep300     | 20.18331 | 20.19556 | 16.89962 | 16.00403 | 17.33578 | 17.265578 |
| ENSMUSG Hgsnat    | 12.36378 | 12.10277 | 10.91633 | 9.550853 | 9.742063 | 10.087752 |
| ENSMUSG Kin       | 8.569226 | 7.198967 | 7.4813   | 6.717827 | 6.174228 | 7.001872  |
| ENSMUSG Aldh3b3   | 0        | 0.027763 | 0        | 0.055757 | 0        | 0.045217  |
| ENSMUSG Rsrp1     | 144.2752 | 158.1731 | 193.9678 | 137.0233 | 167.1595 | 205.04958 |
| ENSMUSG Platr17   | 0.15286  | 0        | 0.217503 | 0.185445 | 0.133253 | 0         |
| ENSMUSG Gm20503   | 0        | 0        | 0        | 0        | 0        | 0         |
| ENSMUSG Esp31     | 0        | 0        | 0        | 0        | 0        | 0         |
| ENSMUSG Kmt2d     | 9.97786  | 10.54646 | 9.923142 | 9.25969  | 9.078022 | 9.278049  |
| ENSMUSG H2bfm     | 0        | 0        | 0        | 0        | 0        | 0         |
| ENSMUSG Ramp2     | 335.4699 | 308.4043 | 368.6421 | 188.9263 | 199.7543 | 169.77672 |
| ENSMUSG Olfr49    | 0.00989  | 0        | 0        | 0        | 0        | 0         |
| ENSMUSG Ccdc81    | 1.245413 | 1.16044  | 0.850982 | 1.188425 | 1.538486 | 1.399453  |
| ENSMUSG Neil3     | 0.233266 | 0.229889 | 0.401533 | 0.783186 | 1.31157  | 0.809177  |
| ENSMUSG Mreg      | 1.042735 | 1.134079 | 0.981368 | 2.329485 | 2.437708 | 2.691345  |
| ENSMUSG Adgra3    | 14.54625 | 17.00404 | 16.58028 | 12.14281 | 12.93209 | 12.110637 |
| ENSMUSG Plp2      | 64.09369 | 67.7478  | 69.61769 | 64.69163 | 71.46471 | 77.52314  |
| ENSMUSG Prickle3  | 4.22006  | 4.906945 | 4.999992 | 3.673752 | 3.496343 | 3.608068  |
| ENSMUSG Sorcs2    | 5.828304 | 4.848913 | 4.265814 | 4.240417 | 4.566843 | 5.446142  |
| ENSMUSG Ccdc22    | 5.193838 | 6.478542 | 7.111986 | 6.644393 | 6.230003 | 6.891093  |
| ENSMUSG Ablim2    | 1.319044 | 1.367686 | 1.282451 | 1.245279 | 1.012078 | 1.413     |
| ENSMUSG Htra3     | 5.253606 | 5.313319 | 4.490887 | 7.00317  | 6.62674  | 7.490368  |
| ENSMUSG Trmt44    | 2.381599 | 2.412965 | 2.506183 | 1.976667 | 2.517219 | 2.703334  |
| ENSMUSG Acox3     | 12.45819 | 11.97251 | 13.09742 | 19.23087 | 17.76464 | 20.69555  |
| ENSMUSG Praf2     | 7.255841 | 9.015482 | 11.13819 | 11.07282 | 12.13301 | 9.906932  |
| ENSMUSG Gpkow     | 15.33248 | 16.52388 | 16.00003 | 13.82607 | 13.95399 | 13.770997 |
| ENSMUSG Aurkc     | 0        | 0        | 0        | 0        | 0        | 0         |
| ENSMUSG Hmgxb4    | 7.629709 | 7.437628 | 7.180628 | 8.153381 | 8.220592 | 8.610077  |
| ENSMUSG Bpifb4    | 0        | 0        | 0        | 0        | 0        | 0         |
| ENSMUSG Gm20075   | 6.017006 | 6.34953  | 5.091224 | 3.946003 | 4.282002 | 6.53192   |
| ENSMUSG Il1rap    | 6.277385 | 7.774321 | 5.752787 | 5.370533 | 6.73619  | 5.337616  |
| ENSMUSG Anks3     | 12.8055  | 12.2316  | 13.9455  | 11.65554 | 11.97588 | 12.496619 |
| ENSMUSG Nudt16l1  | 25.1014  | 22.24818 | 21.20294 | 16.83233 | 18.24213 | 22.008913 |
| ENSMUSG Mgrn1     | 35.11649 | 32.69564 | 32.13773 | 34.73852 | 34.80518 | 37.342186 |
| ENSMUSG Trp63     | 0.160433 | 0.097725 | 0.03079  | 0.284095 | 0.121266 | 0.227522  |
| ENSMUSG Cldn1     | 2.808658 | 3.387058 | 3.109294 | 4.438778 | 4.89767  | 4.109447  |
| ENSMUSG 4930562C  | 2.05484  | 2.269569 | 1.569005 | 2.949225 | 2.353143 | 2.426918  |
| ENSMUSG Srl       | 0.627047 | 2.544714 | 0.87876  | 1.334344 | 0.980506 | 1.103889  |
| Mus_musc Mus_musc | 0        | 0        | 0        | 0        | 0        | 0         |
| Mus_musc Mus_musc | 0.380156 | 0.853015 | 0.410548 | 1.27861  | 1.313414 | 0.823146  |
| Mus_musc Mus_musc | 0.210207 | 0        | 0.301761 | 0        | 0        | 0         |
| Mus_musc Mus_musc | 0.10048  | 0        | 0        | 0        | 0        | 0.197213  |
| Mus_musc Mus_musc | 0        | 0        | 0        | 0        | 0        | 0         |
| ENSMUSG Slc7a14   | 0.00634  | 0.021663 | 0.00881  | 0.054276 | 0.030909 | 0.039251  |
| ENSMUSG Mrpl14    | 57.97791 | 62.05529 | 66.77632 | 54.81239 | 49.96198 | 49.057934 |
| ENSMUSG Tsga13    | 0        | 0        | 0        | 0        | 0        | 0         |
| ENSMUSG Serpinb10 | 3.085934 | 1.188758 | 6.444146 | 1.610027 | 0.469917 | 0.444959  |
| ENSMUSG Zcchc7    | 9.613257 | 10.27525 | 10.39407 | 9.792991 | 7.832218 | 8.185283  |
| ENSMUSG Cbarp     | 6.055129 | 4.814926 | 4.156051 | 5.356596 | 4.700116 | 5.352252  |
| ENSMUSG Aamdc     | 13.5156  | 14.86386 | 15.1169  | 9.007346 | 12.7472  | 11.17964  |
| ENSMUSG Gnat2     | 0        | 0.087417 | 0.100013 | 0.214877 | 0.185238 | 0.174099  |
| Mus_musc Mus_musc | 0        | 0        | 0        | 0.097374 | 0        | 0         |
| ENSMUSG Cox10     | 4.229288 | 3.348696 | 3.222189 | 3.765435 | 3.633872 | 3.734021  |
| ENSMUSG Arhgef2   | 64.35832 | 64.03937 | 58.42013 | 47.92123 | 46.38094 | 48.489768 |
| ENSMUSG Ash1l     | 16.21521 | 15.89139 | 13.06885 | 12.50824 | 13.03447 | 12.156813 |
| ENSMUSG Hcn3      | 0.084384 | 0.025155 | 0.050867 | 0.073698 | 0.064177 | 0.092047  |
| ENSMUSG Rit1      | 28.46756 | 30.4152  | 34.35969 | 25.80788 | 23.96151 | 29.242603 |
| ENSMUSG Gm49336   | 14.06203 | 12.87637 | 12.00221 | 12.2177  | 11.75899 | 12.789904 |
| ENSMUSG Cpocr1    | 0        | 0        | 0        | 0        | 0        | 0         |

|                   |          |          |          |          |          |           |
|-------------------|----------|----------|----------|----------|----------|-----------|
| ENSMUSG Smc6      | 17.68513 | 15.47243 | 16.28157 | 16.27969 | 14.70452 | 13.679299 |
| ENSMUSG Apob      | 0.004048 | 0.016146 | 0.014549 | 0.100084 | 0.101787 | 0.172942  |
| ENSMUSG Fam84a    | 2.740681 | 2.867136 | 1.769286 | 3.018919 | 2.15575  | 2.394731  |
| ENSMUSG Arsg      | 1.470701 | 1.142048 | 1.017811 | 2.299979 | 3.055452 | 2.57728   |
| ENSMUSG Hs1bp3    | 5.945611 | 5.26774  | 5.798523 | 7.970869 | 7.588486 | 8.335066  |
| ENSMUSG Vapa      | 23.63241 | 22.99208 | 20.57007 | 17.72855 | 19.80716 | 17.079479 |
| ENSMUSG Slc7a15   | 0        | 0.026717 | 0        | 0        | 0        | 0         |
| ENSMUSG Trib2     | 24.31394 | 25.68634 | 21.4741  | 16.08258 | 16.30247 | 15.376346 |
| ENSMUSG B3gnt9    | 5.826173 | 4.820231 | 5.959694 | 5.218891 | 4.785874 | 6.454304  |
| ENSMUSG Ces3a     | 0        | 0        | 0        | 0        | 0        | 0         |
| ENSMUSG Cldn34d   | 0        | 0        | 0        | 0        | 0        | 0         |
| ENSMUSG Gm29776   | 0.255553 | 0.180598 | 0.19775  | 0.265185 | 0.149625 | 0.217847  |
| ENSMUSG Cryga     | 0        | 0        | 0        | 0        | 0        | 0         |
| ENSMUSG Gm9493    | 6.970458 | 7.036929 | 8.024339 | 11.65634 | 7.031917 | 8.581327  |
| ENSMUSG Chuk      | 14.44011 | 13.7272  | 13.87687 | 15.07405 | 12.92384 | 12.904255 |
| ENSMUSG Car3      | 10.34274 | 42.99884 | 0.875168 | 22.44601 | 6.472131 | 13.066583 |
| ENSMUSG Atp13a5   | 0.03431  | 0.033264 | 0.071168 | 0.008478 | 0        | 0.022833  |
| ENSMUSG Car1      | 0        | 0.914544 | 0        | 2.044174 | 0.712279 | 0.619365  |
| ENSMUSG Olfr1253  | 0        | 0        | 0        | 0        | 0        | 0         |
| ENSMUSG Olfr1254  | 0        | 0        | 0        | 0        | 0        | 0         |
| ENSMUSG Olfr1256  | 0        | 0.050264 | 0        | 0        | 0        | 0         |
| ENSMUSG E2f5      | 5.436422 | 6.134442 | 4.882188 | 5.240422 | 4.894001 | 4.875318  |
| ENSMUSG Tada3     | 10.49085 | 12.08409 | 11.59624 | 9.931094 | 11.16928 | 9.510839  |
| ENSMUSG Lrrcc1    | 4.006455 | 4.10048  | 3.248467 | 4.143109 | 3.780598 | 3.815444  |
| ENSMUSG EglN2     | 37.69145 | 40.26176 | 40.06466 | 36.16184 | 37.18564 | 39.367589 |
| ENSMUSG Memo1     | 6.234076 | 5.76194  | 6.445992 | 7.169497 | 6.618989 | 7.721313  |
| ENSMUSG 0610030E2 | 11.38511 | 12.46172 | 12.28046 | 10.47095 | 10.27639 | 10.444278 |
| ENSMUSG Gm28845   | 0        | 0        | 0        | 0        | 0        | 0         |
| ENSMUSG Necap2    | 39.31121 | 39.42637 | 43.08649 | 40.65122 | 41.65358 | 42.701854 |
| ENSMUSG Fbxo42    | 6.760465 | 7.390397 | 5.954777 | 6.403334 | 6.406326 | 6.635796  |
| ENSMUSG Padi2     | 0.371494 | 0.401417 | 0.661732 | 0.548147 | 0.487418 | 0.383072  |
| Mus_musc Mus_musc | 2.398693 | 3.23658  | 0.476093 | 548.6819 | 218.1065 | 208.58037 |
| ENSMUSG MglI      | 40.75804 | 43.81117 | 38.86097 | 38.80883 | 38.90053 | 40.529243 |
| ENSMUSG Tmprss7   | 0        | 0        | 0        | 0        | 0        | 0         |
| ENSMUSG Card10    | 17.49481 | 15.44004 | 16.7491  | 10.06065 | 11.95561 | 10.244336 |
| ENSMUSG Gm5941    | 0        | 0        | 0        | 0        | 0        | 0         |
| ENSMUSG Rps14     | 437.2151 | 435.7723 | 424.2058 | 504.7209 | 456.7083 | 505.37864 |
| ENSMUSG Dctn4     | 23.56614 | 23.40094 | 23.09254 | 18.08603 | 18.80046 | 18.430832 |
| ENSMUSG Slc27a6   | 1.633717 | 1.197185 | 1.346051 | 2.068166 | 1.944756 | 2.720731  |
| ENSMUSG Isoc1     | 22.80477 | 21.40814 | 20.10766 | 20.60347 | 20.3455  | 18.239038 |
| ENSMUSG Rbm22     | 17.38823 | 19.7437  | 18.63672 | 15.40185 | 15.96486 | 15.832849 |
| ENSMUSG Ddit3     | 0        | 0        | 0        | 0        | 0        | 0         |
| ENSMUSG Rpl18     | 342.6827 | 219.9408 | 252.8134 | 269.2695 | 256.4294 | 259.72433 |
| ENSMUSG Pth       | 0        | 0        | 0        | 0        | 0        | 0         |
| ENSMUSG Rgs1      | 0.469601 | 0.227989 | 0.859379 | 4.826307 | 4.404062 | 5.392531  |
| ENSMUSG Atmin     | 9.767726 | 9.140063 | 8.120401 | 8.259185 | 8.323294 | 8.413367  |
| ENSMUSG Kctd3     | 8.43438  | 8.016262 | 8.474723 | 7.379036 | 6.894377 | 7.452398  |
| ENSMUSG Ush2a     | 0        | 0        | 0        | 0        | 0        | 0         |
| ENSMUSG Ptpn14    | 12.92777 | 12.12606 | 10.55122 | 7.786947 | 7.72612  | 7.756271  |
| ENSMUSG Cenpf     | 0.125523 | 0.156486 | 0.192356 | 0.652756 | 0.947203 | 1.12387   |
| ENSMUSG Soat1     | 11.6595  | 11.08672 | 11.91288 | 16.9063  | 16.78348 | 18.640217 |
| ENSMUSG Axdnd1    | 0.203212 | 0.086319 | 0.042386 | 0.158574 | 0.12939  | 0.199341  |
| ENSMUSG Nphs2     | 1.15195  | 1.763228 | 1.411738 | 1.870394 | 1.646589 | 1.607728  |
| ENSMUSG Smyd2     | 6.60813  | 6.679111 | 4.91512  | 5.622586 | 7.167097 | 7.993903  |
| ENSMUSG Olfr592   | 0        | 0        | 0        | 0        | 0        | 0         |
| ENSMUSG Egflam    | 18.19156 | 14.91703 | 19.32181 | 10.46521 | 10.23914 | 9.568517  |
| ENSMUSG Efnb3     | 0.113133 | 0.197698 | 0.183213 | 0.141761 | 0.109564 | 0.231983  |
| ENSMUSG Sfxn1     | 5.722966 | 6.330145 | 5.477222 | 9.842448 | 8.2633   | 7.797273  |
| ENSMUSG S100a2    | 0        | 0        | 0        | 0        | 0        | 0         |
| ENSMUSG Vmn1r119  | 0        | 0        | 0        | 0        | 0        | 0         |
| ENSMUSG Vmn1r94   | 0        | 0        | 0        | 0        | 0        | 0         |
| ENSMUSG Gm10024   | 0        | 0        | 0        | 0        | 0        | 0         |
| ENSMUSG Olfr599   | 0        | 0        | 0        | 0        | 0        | 0         |
| ENSMUSG Pcdhb13   | 0.146877 | 0.278256 | 0.225036 | 0.264636 | 0.312345 | 0.096214  |

|                    |          |          |          |          |          |           |
|--------------------|----------|----------|----------|----------|----------|-----------|
| ENSMUSG Sdk2       | 0.399861 | 0.506847 | 0.453248 | 0.270668 | 0.375469 | 0.162042  |
| Mus_musc Mus_musc  | 0.15207  | 0.046584 | 0        | 0.582086 | 0        | 0.101278  |
| Mus_musc Mus_musc  | 0.346475 | 0        | 0.06651  | 0.54146  | 0.072031 | 0.485685  |
| Mus_musc Mus_musc  | 0.112842 | 0        | 0.398915 | 0        | 0        | 0.17289   |
| Mus_musc Mus_musc  | 0.173565 | 0        | 0.045413 | 0.102913 | 0.040818 | 0.128402  |
| Mus_musc Mus_musc  | 0        | 0.007587 | 0        | 0.04649  | 0.388798 | 0.048524  |
| Mus_musc Mus_musc  | 0        | 0        | 0        | 0        | 0.589342 | 0.07467   |
| Mus_musc Mus_musc  | 0.367755 | 0.457719 | 0.41343  | 0.96076  | 0.983089 | 0.40723   |
| Mus_musc Mus_musc  | 0.161405 | 0.232746 | 0.264862 | 0.094087 | 0.03675  | 0         |
| Mus_musc Mus_musc  | 0.1949   | 0.056181 | 0        | 0.126711 | 0.09108  | 0.084493  |
| ENSMUSG Sprr2f     | 0        | 0        | 0        | 0        | 0        | 0         |
| ENSMUSG Gm21891    | 0        | 0        | 0        | 0        | 0        | 0         |
| ENSMUSG Vmn1r111   | 0        | 0        | 0        | 0        | 0        | 0         |
| ENSMUSG Gmnn       | 8.08928  | 7.529799 | 7.07989  | 10.31462 | 9.003899 | 10.260492 |
| ENSMUSG Acot13     | 20.29305 | 19.0558  | 19.1179  | 25.03202 | 21.40165 | 20.676121 |
| ENSMUSG Olfr741    | 0        | 0        | 0        | 0        | 0        | 0         |
| ENSMUSG Cdc42ep4   | 53.30976 | 56.64702 | 54.67541 | 30.35812 | 32.59259 | 28.867898 |
| ENSMUSG Ralgapa2   | 12.42485 | 11.39963 | 9.833419 | 10.13624 | 10.29274 | 10.830648 |
| ENSMUSG Deaf1      | 10.19334 | 11.18037 | 12.17425 | 9.033681 | 8.572948 | 8.003788  |
| ENSMUSG Olfr1025-1 | 0        | 0        | 0        | 0        | 0        | 0         |
| ENSMUSG Zfp708     | 0.006385 | 0.017776 | 0.026897 | 0.018078 | 0.035166 | 0.425734  |
| ENSMUSG Zfp516     | 5.468178 | 5.036084 | 5.026325 | 5.021732 | 4.830928 | 4.996522  |
| ENSMUSG A4galt     | 13.50206 | 13.24597 | 13.46549 | 10.36711 | 13.67497 | 8.166867  |
| ENSMUSG Usp14      | 9.865256 | 9.128968 | 9.213413 | 8.774475 | 8.885354 | 10.022643 |
| Mus_musc Mus_musc  | 0        | 0        | 0        | 0        | 0        | 0         |
| Mus_musc Mus_musc  | 0        | 0.155464 | 0.289303 | 0.303769 | 0.341102 | 0.508622  |
| ENSMUSG Gpr157     | 1.287516 | 1.35641  | 1.194965 | 1.269898 | 1.396497 | 1.758565  |
| Mus_musc Mus_musc  | 0        | 0        | 0        | 0.342327 | 0        | 0         |
| ENSMUSG Agpat1     | 27.57375 | 27.2652  | 30.27813 | 25.04039 | 25.98528 | 29.125087 |
| ENSMUSG Arhgap27   | 22.2752  | 18.0417  | 21.79346 | 16.09834 | 17.79912 | 18.059811 |
| ENSMUSG Psmc12     | 24.59711 | 24.22672 | 24.70745 | 21.75312 | 23.33125 | 22.388689 |
| ENSMUSG Senp6      | 20.33142 | 21.34097 | 21.51057 | 19.47596 | 21.95361 | 19.225854 |
| ENSMUSG Gm2030     | 0        | 0        | 0        | 0        | 0        | 0         |
| ENSMUSG Flvcr2     | 7.059609 | 6.32799  | 5.970946 | 2.678835 | 2.581219 | 2.666116  |
| ENSMUSG Exosc4     | 10.96782 | 10.85211 | 11.27403 | 10.31022 | 9.645905 | 9.33411   |
| ENSMUSG Hexim2     | 2.045324 | 2.323588 | 1.819086 | 1.591091 | 1.81295  | 1.529674  |
| ENSMUSG Ttll9      | 0.891243 | 0.577871 | 0.60602  | 1.238097 | 0.977873 | 0.924811  |
| ENSMUSG Tspyl3     | 2.89484  | 2.470807 | 2.463212 | 3.802242 | 2.778569 | 3.064614  |
| ENSMUSG Foxs1      | 1.135216 | 0.796617 | 1.474293 | 2.184427 | 2.352241 | 2.24016   |
| ENSMUSG Sirpb1c    | 1.737852 | 1.51298  | 3.7178   | 2.800559 | 1.975237 | 1.874245  |
| ENSMUSG Defb25     | 0.28301  | 0.181168 | 0        | 0.542839 | 0        | 0.055947  |
| ENSMUSG Defb28     | 0        | 0        | 0        | 0        | 0        | 0         |
| ENSMUSG Gm15056    | 0.141922 | 0.163022 | 0.088622 | 3.69988  | 3.766833 | 3.528887  |
| ENSMUSG Rpl22      | 76.94368 | 71.77905 | 74.48723 | 80.10539 | 102.7226 | 72.73044  |
| ENSMUSG Cd163      | 1.842347 | 2.05091  | 1.386979 | 5.43266  | 8.432402 | 5.847813  |
| ENSMUSG Kcnab2     | 5.846244 | 4.405511 | 7.40845  | 14.23313 | 14.23977 | 15.938148 |
| ENSMUSG Psmc2      | 37.31271 | 36.10694 | 38.88854 | 35.1536  | 36.26478 | 35.795181 |
| ENSMUSG Xrcc2      | 1.74886  | 1.590187 | 1.352374 | 1.431341 | 1.816531 | 1.632774  |
| Mus_musc Mus_musc  | 2.123575 | 3.625921 | 0.367796 | 24.05428 | 427.781  | 378.53445 |
| Mus_musc Mus_musc  | 0.475935 | 1.857728 | 0.250317 | 62.24412 | 3.444339 | 15.305552 |
| Mus_musc Mus_musc  | 1.951046 | 3.461864 | 1.017169 | 81.83952 | 29.06351 | 81.938782 |
| Mus_musc Mus_musc  | 0.263827 | 0.118029 | 0.065479 | 6.250212 | 17.37553 | 369.14764 |
| ENSMUSG Galnt15    | 0        | 0        | 0        | 0        | 0        | 0         |
| Mus_musc Mus_musc  | 1.758774 | 2.428192 | 0.701206 | 390.4195 | 113.6968 | 91.730613 |
| Mus_musc Mus_musc  | 0        | 0        | 0.239626 | 2.325088 | 3.388057 | 12.092678 |
| Mus_musc Mus_musc  | 0        | 0.438194 | 0        | 1.363985 | 4.673937 | 0.624439  |
| ENSMUSG Brca1      | 0.337185 | 0.302272 | 0.205721 | 0.734591 | 1.154996 | 1.127701  |
| ENSMUSG Rnd3       | 6.9438   | 5.428194 | 6.666703 | 4.577904 | 4.211982 | 3.982598  |
| ENSMUSG Gbp4       | 33.85217 | 26.5499  | 297.3884 | 165.6286 | 32.32195 | 47.281455 |
| ENSMUSG Gm43302    | 2.115148 | 2.158526 | 30.04306 | 20.72371 | 4.147401 | 6.443933  |
| ENSMUSG Gm3558     | 0.026581 | 0.03379  | 0        | 0.033194 | 0.027254 | 0         |
| Mus_musc Mus_musc  | 0.173014 | 0.071058 | 0.065235 | 0.550066 | 0.422794 | 0.278889  |
| Mus_musc Mus_musc  | 14.18434 | 14.37504 | 22.69076 | 18.03795 | 19.66316 | 10.819432 |
| Mus_musc Mus_musc  | 0.259414 | 0.35309  | 0.823061 | 0.643471 | 0        | 0.598331  |

|                   |          |          |          |          |          |           |
|-------------------|----------|----------|----------|----------|----------|-----------|
| Mus_musc Mus_musc | 0        | 0        | 0        | 0        | 0        | 0         |
| Mus_musc Mus_musc | 0        | 0.154309 | 0        | 0        | 0        | 0         |
| ENSMUSG Fbrs      | 18.08597 | 14.61857 | 16.37274 | 16.27082 | 14.81382 | 14.134674 |
| ENSMUSG Dhx29     | 8.021074 | 8.109674 | 8.020642 | 7.678045 | 7.448514 | 8.130807  |
| ENSMUSG Tmem60    | 6.033891 | 5.147768 | 7.491074 | 7.755021 | 5.250173 | 5.207316  |
| ENSMUSG Frmpd3    | 0.022161 | 0.031351 | 0.019795 | 0.013276 | 0.031115 | 0.06409   |
| ENSMUSG Cox19     | 4.871468 | 5.287605 | 5.251644 | 4.694094 | 5.617706 | 4.794072  |
| ENSMUSG Dbp       | 33.33029 | 15.85433 | 10.38122 | 6.669296 | 6.896501 | 4.690598  |
| ENSMUSG Adora1    | 1.115006 | 1.128546 | 0.932499 | 1.134172 | 1.285294 | 1.373537  |
| ENSMUSG Nkapd1    | 8.073254 | 7.601839 | 7.522816 | 6.997446 | 7.336381 | 6.356669  |
| ENSMUSG Olfr847   | 0        | 0        | 0        | 0        | 0        | 0         |
| ENSMUSG Gm3404    | 0        | 0        | 0        | 0        | 0        | 0         |
| ENSMUSG 4930449I2 | 0        | 0        | 0        | 0        | 0        | 0         |
| ENSMUSG Prl2c2    | 0        | 0        | 0        | 0        | 0.012712 | 0         |
| ENSMUSG Defb10    | 0        | 0        | 0        | 0        | 0        | 0         |
| ENSMUSG Abca6     | 1.047091 | 1.057369 | 0.662881 | 0.717617 | 0.689871 | 0.50899   |
| ENSMUSG Defb1     | 0        | 0        | 0        | 0        | 0        | 0.098007  |
| ENSMUSG Tceal9    | 85.01997 | 81.57207 | 82.05981 | 94.29978 | 97.92786 | 95.241334 |
| ENSMUSG Wfdc11    | 0        | 0        | 0        | 0        | 0        | 0         |
| ENSMUSG Ak6       | 24.98011 | 24.49795 | 26.86014 | 30.83601 | 27.52508 | 29.346794 |
| ENSMUSG Naip6     | 0.571209 | 0.438867 | 0.501266 | 0.961537 | 0.832933 | 0.873946  |
| ENSMUSG Naip2     | 3.866669 | 3.178251 | 3.385092 | 5.346368 | 6.812446 | 6.537045  |
| ENSMUSG R3hdml    | 0        | 0        | 0        | 0.209328 | 0        | 0.14075   |
| ENSMUSG Ppp1r3a   | 0.479379 | 0.935006 | 0.503631 | 0.518176 | 0.424822 | 0.39011   |
| ENSMUSG Trim31    | 0.093531 | 0        | 0        | 0        | 0.024821 | 0         |
| ENSMUSG Prkaa1    | 12.91948 | 12.28239 | 11.82951 | 10.76138 | 10.95272 | 10.59327  |
| ENSMUSG Acbd4     | 21.48318 | 18.15276 | 19.3771  | 16.07283 | 15.95933 | 17.689593 |
| ENSMUSG Smpd3     | 1.251935 | 1.613014 | 1.108412 | 1.763735 | 1.356297 | 1.896116  |
| Mus_musc Mus_musc | 0        | 0.075191 | 0        | 0.476804 | 0        | 0.092763  |
| Mus_musc Mus_musc | 1.45043  | 1.532553 | 1.868339 | 1.830164 | 1.826431 | 2.458954  |
| Mus_musc Mus_musc | 2.349134 | 2.6846   | 1.318607 | 2.452176 | 3.314703 | 2.741549  |
| Mus_musc Mus_musc | 0        | 0        | 0        | 0.038259 | 0        | 0.402336  |
| ENSMUSG Rbsn      | 9.396674 | 8.248096 | 8.231124 | 8.106291 | 8.742515 | 8.496292  |
| Mus_musc Mus_musc | 0        | 0        | 0        | 0.373654 | 0        | 0.226372  |
| Mus_musc Mus_musc | 2.68647  | 3.564003 | 1.877815 | 1.25737  | 1.711423 | 1.758961  |
| Mus_musc Mus_musc | 0        | 0.14483  | 0        | 0        | 0.107045 | 0         |
| ENSMUSG Lime1     | 5.811823 | 5.588654 | 7.269817 | 7.232822 | 6.451605 | 4.379709  |
| ENSMUSG 4933406M  | 0        | 0        | 0        | 0        | 0        | 0         |
| ENSMUSG Cldn8     | 2.41887  | 2.355247 | 1.821441 | 1.58461  | 1.65844  | 1.067201  |
| ENSMUSG Cdk5r2    | 0        | 0        | 0        | 0.03264  | 0        | 0         |
| ENSMUSG Gramd1b   | 4.80145  | 4.566803 | 4.836354 | 5.449508 | 5.479645 | 5.785898  |
| ENSMUSG Mrps35    | 3.273247 | 3.811294 | 3.484805 | 3.632556 | 3.270144 | 3.971532  |
| ENSMUSG Mettl11b  | 0.031514 | 0        | 0.048133 | 0.054441 | 0        | 0         |
| ENSMUSG Tm6sf1    | 7.056359 | 8.141394 | 11.65961 | 12.7018  | 12.74039 | 13.583588 |
| ENSMUSG Cacna2d1  | 5.12756  | 4.14585  | 3.697999 | 3.701968 | 3.627798 | 2.808887  |
| ENSMUSG Gm2022    | 0        | 0        | 0        | 0        | 0        | 0         |
| ENSMUSG A030014E: | 0.070866 | 0        | 0        | 0        | 0        | 0         |
| Mus_musc Mus_musc | 0.154321 | 0        | 0        | 0        | 0.14318  | 0.290956  |
| Mus_musc Mus_musc | 0.304134 | 0.031439 | 0.14997  | 0.05897  | 0        | 0         |
| Mus_musc Mus_musc | 1.026619 | 1.102871 | 0.820023 | 1.06794  | 0.702607 | 0.751805  |
| Mus_musc Mus_musc | 0.278148 | 0.190223 | 0.082963 | 0.466016 | 0.341784 | 0.180289  |
| Mus_musc Mus_musc | 0        | 0        | 0        | 0.522048 | 0        | 0         |
| Mus_musc Mus_musc | 0.689757 | 0.744649 | 0.810408 | 1.547796 | 2.127431 | 1.126905  |
| Mus_musc Mus_musc | 0        | 0.144149 | 0.126354 | 0.078773 | 0        | 0.061016  |
| Mus_musc Mus_musc | 0.337933 | 0.236805 | 0.302589 | 0.153926 | 0.118281 | 0.215693  |
| ENSMUSG Gm10203   | 0        | 0        | 0        | 0        | 0        | 0         |
| ENSMUSG B4galt5   | 12.87631 | 12.41633 | 15.17085 | 14.8463  | 14.66312 | 17.317379 |
| ENSMUSG Mbd6      | 13.04904 | 11.62061 | 15.29836 | 12.09547 | 12.74673 | 13.772409 |
| ENSMUSG Ddit3     | 20.02365 | 22.59137 | 25.19934 | 15.80582 | 15.15472 | 17.459186 |
| ENSMUSG Gli1      | 1.398389 | 0.927034 | 1.078083 | 1.00639  | 1.116517 | 1.375136  |
| ENSMUSG Crygd     | 0        | 0        | 0        | 0        | 0        | 0         |
| ENSMUSG Inhbc     | 0        | 0        | 0        | 0        | 0        | 0         |
| ENSMUSG R3hdm2    | 32.0284  | 30.9847  | 27.80843 | 23.84847 | 23.7472  | 24.372387 |
| ENSMUSG Pclo      | 0.230737 | 0.217948 | 0.114606 | 0.219019 | 0.150883 | 0.228146  |

|                   |          |          |          |          |          |           |
|-------------------|----------|----------|----------|----------|----------|-----------|
| ENSMUSG Nab2      | 15.29229 | 14.70144 | 15.15083 | 13.71229 | 12.19579 | 13.333645 |
| ENSMUSG Akap6     | 0.188006 | 0.283768 | 0.097457 | 0.298717 | 0.257335 | 0.170404  |
| ENSMUSG Vmn1r78   | 0        | 0        | 0        | 0        | 0        | 0         |
| ENSMUSG Npm3      | 15.39476 | 15.58541 | 17.73525 | 17.26395 | 16.8658  | 16.347927 |
| ENSMUSG Tas2r135  | 0.027365 | 0.040377 | 0.183774 | 0.012418 | 0        | 0.045836  |
| ENSMUSG Cfl1      | 337.7968 | 307.6703 | 360.3833 | 351.0086 | 341.0625 | 363.65643 |
| ENSMUSG Pgpep1    | 5.9697   | 5.993618 | 5.465948 | 4.922899 | 5.086019 | 5.451513  |
| Mus_musc Mus_musc | 0.291176 | 0.188526 | 0.473633 | 0.333153 | 0.395842 | 0.105707  |
| Mus_musc Mus_musc | 0.318678 | 0.504837 | 0.038336 | 0.503306 | 0.339535 | 0.680414  |
| Mus_musc Mus_musc | 0.098967 | 0.336164 | 0        | 0.282379 | 0.142574 | 0.481103  |
| Mus_musc Mus_musc | 0.126603 | 0.138325 | 0        | 0.380617 | 0        | 0.193726  |
| ENSMUSG 8030462N  | 6.683652 | 8.412369 | 6.950584 | 5.628228 | 5.856903 | 5.965061  |
| ENSMUSG Cnksr3    | 8.29366  | 9.306893 | 7.74856  | 6.211135 | 6.612884 | 6.410731  |
| ENSMUSG Spaca3    | 0        | 0        | 0        | 0        | 0        | 0         |
| ENSMUSG Gm609     | 0.026583 | 0        | 0        | 0        | 0.052084 | 0         |
| ENSMUSG A830005F: | 0.067462 | 0        | 0.128959 | 0.254604 | 0.069119 | 0.113886  |
| ENSMUSG Ube2e3    | 14.99336 | 15.85157 | 15.48028 | 13.87626 | 13.70123 | 14.607427 |
| ENSMUSG Lrrtm4    | 0        | 0        | 0        | 0        | 0        | 0         |
| ENSMUSG Serp2     | 0.662318 | 0.36285  | 0.554819 | 0.77597  | 0.663677 | 0.463142  |
| ENSMUSG Lefty2    | 0.03642  | 0        | 0        | 0        | 0        | 0         |
| ENSMUSG Vmn1r44   | 0        | 0        | 0        | 0        | 0        | 0         |
| ENSMUSG Vmn1r42   | 0        | 0        | 0        | 0        | 0        | 0         |
| ENSMUSG Vmn1r43   | 0        | 0        | 0        | 0.012231 | 0        | 0         |
| ENSMUSG Lmbr1l    | 8.221111 | 7.197449 | 9.500642 | 6.569009 | 6.859972 | 6.414782  |
| ENSMUSG Snrnp70   | 60.25708 | 59.85012 | 74.42496 | 60.11143 | 54.94994 | 57.653279 |
| ENSMUSG Lalba     | 0        | 0        | 0        | 0        | 0        | 0         |
| ENSMUSG Kansl2    | 15.67435 | 13.19279 | 11.39237 | 12.34635 | 12.23183 | 15.264149 |
| ENSMUSG 4930415O  | 0.261155 | 0.169795 | 0.409625 | 0.59284  | 0.684204 | 0.362761  |
| ENSMUSG Adcy6     | 18.99487 | 22.12396 | 21.46576 | 17.54414 | 14.93656 | 17.161764 |
| ENSMUSG Enah      | 4.4585   | 4.972489 | 3.516402 | 3.663494 | 3.918476 | 3.456899  |
| ENSMUSG Wnt10b    | 8.538015 | 7.487472 | 7.141025 | 2.364659 | 1.683754 | 2.228677  |
| ENSMUSG Wnt1      | 0        | 0        | 0        | 0        | 0        | 0         |
| ENSMUSG Atp6v0b   | 88.99641 | 86.51965 | 93.9929  | 95.40469 | 92.73669 | 99.178648 |
| ENSMUSG Fntb      | 5.991739 | 4.71348  | 4.909223 | 3.705873 | 4.649864 | 4.36348   |
| ENSMUSG B230217C: | 0.426756 | 0.613076 | 0.445366 | 0.508321 | 0.460621 | 0.827301  |
| ENSMUSG Palmd     | 28.72517 | 28.51372 | 29.78246 | 15.12658 | 15.17773 | 14.793042 |
| ENSMUSG Dnah12    | 1.43268  | 1.772409 | 0.926386 | 2.316088 | 2.742458 | 2.281241  |
| ENSMUSG Brinp1    | 0.580134 | 0.424567 | 0.381316 | 1.115394 | 0.82605  | 0.953273  |
| ENSMUSG Rnase10   | 0.119121 | 0.025292 | 0        | 0.091228 | 0        | 0.03392   |
| ENSMUSG Slmap     | 28.84297 | 29.71777 | 27.2915  | 26.09969 | 27.22557 | 23.929083 |
| ENSMUSG Gm49342   | 0        | 0        | 0        | 0        | 0        | 0         |
| ENSMUSG Rnase4    | 170.172  | 174.8136 | 156.9323 | 143.626  | 136.2521 | 152.49701 |
| ENSMUSG Arf4      | 78.43725 | 74.86183 | 78.19063 | 83.29347 | 85.48224 | 89.232953 |
| ENSMUSG Heatr4    | 0.014112 | 0.068825 | 0.005839 | 0.017241 | 0.039883 | 0         |
| ENSMUSG Myl6      | 666.784  | 659.5241 | 725.4839 | 619.117  | 596.9478 | 695.6096  |
| ENSMUSG 1700092M  | 0        | 0        | 0.056016 | 0        | 0        | 0         |
| ENSMUSG Ackr1     | 0        | 0.11132  | 0.067545 | 1.062531 | 0.868898 | 0.622573  |
| ENSMUSG Jmjd1c    | 13.55138 | 12.86236 | 11.27376 | 13.05316 | 13.57409 | 13.338286 |
| ENSMUSG Ambp      | 0        | 0        | 0        | 0        | 0        | 0         |
| ENSMUSG Sdha      | 65.52988 | 68.91074 | 66.53944 | 67.08586 | 70.3084  | 70.603065 |
| ENSMUSG Bnc1      | 1.655737 | 1.483176 | 1.223315 | 1.443667 | 0.75418  | 1.587486  |
| ENSMUSG Btg1      | 21.08052 | 18.69309 | 23.46976 | 22.87721 | 22.60607 | 24.223147 |
| ENSMUSG Tbc1d24   | 1.468804 | 1.458954 | 1.479429 | 1.605302 | 1.580067 | 1.594521  |
| ENSMUSG Pdc6      | 37.53771 | 36.70893 | 41.95493 | 36.22777 | 37.72122 | 38.912018 |
| ENSMUSG Gm156     | 0        | 0        | 0        | 0        | 0        | 0         |
| ENSMUSG Olfr1359  | 0        | 0        | 0        | 0        | 0        | 0         |
| ENSMUSG Tas2r121  | 0        | 0        | 0        | 0        | 0        | 0         |
| ENSMUSG Dgkk      | 0.018685 | 0        | 0.024815 | 0.111244 | 0.123627 | 0.079518  |
| ENSMUSG Zfp706    | 30.85656 | 32.56864 | 30.76454 | 28.90964 | 28.72873 | 28.339011 |
| ENSMUSG Tmigdl    | 0.40786  | 0.291085 | 0.09021  | 0.193162 | 0        | 0.273372  |
| ENSMUSG Slc6a4    | 4.882883 | 5.190944 | 5.171121 | 2.753031 | 2.911921 | 2.822071  |
| ENSMUSG Dhrrs13   | 3.418683 | 4.095578 | 2.702152 | 2.439006 | 3.513568 | 3.567679  |
| ENSMUSG Coro6     | 2.621465 | 2.852421 | 3.832737 | 1.234167 | 0.94781  | 0.463174  |
| ENSMUSG 0610010K: | 3.761428 | 3.782776 | 3.88577  | 2.562013 | 1.967271 | 2.320394  |



|                   |          |          |          |          |          |           |
|-------------------|----------|----------|----------|----------|----------|-----------|
| ENSMUSG Vmo1      | 0        | 0        | 0        | 0        | 0        | 0         |
| ENSMUSG Eral1     | 7.366556 | 6.593311 | 6.518679 | 6.51757  | 7.664629 | 6.128994  |
| ENSMUSG Sec14I5   | 0.445739 | 0.49258  | 0.35665  | 0.458753 | 0.353694 | 0.357465  |
| ENSMUSG Adgrg5    | 0.703529 | 0.768722 | 2.023389 | 1.296409 | 0.811181 | 1.723746  |
| ENSMUSG Gm16506   | 0        | 0        | 0        | 0        | 0        | 0         |
| ENSMUSG Catsper1  | 0        | 0        | 0        | 0        | 0        | 0         |
| ENSMUSG Slc19a3   | 1.481174 | 1.798126 | 1.414201 | 1.344676 | 1.018459 | 1.189912  |
| ENSMUSG Tmco3     | 9.776506 | 9.735497 | 9.901392 | 9.896782 | 10.28729 | 9.971451  |
| ENSMUSG Otud7b    | 30.65618 | 29.78915 | 27.46443 | 20.14414 | 20.79702 | 19.971194 |
| ENSMUSG Vmn1r47   | 0        | 0        | 0        | 0        | 0        | 0         |
| ENSMUSG Tmsb15a   | 0        | 0        | 0.180117 | 0        | 0.064312 | 0         |
| ENSMUSG Hoxb7     | 1.122654 | 0.600264 | 0.989147 | 0.757799 | 0.964698 | 0.891284  |
| ENSMUSG Bud31     | 34.13107 | 36.20774 | 36.44026 | 34.93384 | 35.41009 | 36.821262 |
| ENSMUSG Arr3      | 0        | 0        | 0        | 0        | 0        | 0.011385  |
| ENSMUSG Pkhd11l   | 2.474268 | 3.137064 | 1.339656 | 1.265713 | 0.907236 | 2.043979  |
| ENSMUSG Sohlh1    | 0        | 0        | 0        | 0        | 0        | 0         |
| ENSMUSG Akap2     | 162.531  | 158.6492 | 139.2507 | 91.57952 | 95.27467 | 84.171001 |
| ENSMUSG Tuba8     | 5.049596 | 4.480969 | 5.340264 | 2.702751 | 3.156528 | 3.641076  |
| ENSMUSG Mug2      | 0        | 0        | 0        | 0        | 0        | 0         |
| ENSMUSG Gmps      | 4.742654 | 4.247541 | 4.134943 | 4.231931 | 4.228621 | 4.315185  |
| ENSMUSG Slc33a1   | 11.7263  | 10.52022 | 10.44275 | 13.0917  | 13.18773 | 13.056446 |
| ENSMUSG Mme       | 29.69932 | 33.05957 | 28.5159  | 24.89585 | 23.76226 | 23.9689   |
| ENSMUSG Kcnab1    | 0.298822 | 0.319651 | 0.280085 | 0.66775  | 0.423898 | 0.698318  |
| ENSMUSG Vmn2r1    | 0        | 0        | 0        | 0        | 0        | 0         |
| ENSMUSG Ccn1l     | 22.70565 | 21.77149 | 23.66289 | 20.54063 | 17.41875 | 19.467558 |
| ENSMUSG Ssr3      | 75.31398 | 72.95477 | 75.67226 | 86.47353 | 89.5262  | 85.357407 |
| ENSMUSG Gm32717   | 0.024649 | 0.014188 | 0.00644  | 0.051349 | 0.037819 | 0.054166  |
| ENSMUSG 1700030J2 | 1.077114 | 1.375817 | 1.105987 | 1.022057 | 1.099774 | 1.184865  |
| ENSMUSG Hsd17b2   | 0.057122 | 0        | 0        | 0        | 0        | 0         |
| ENSMUSG Bco1      | 0.240468 | 0.079583 | 0.270457 | 0.093409 | 0.030743 | 0.097056  |
| ENSMUSG Pde4c     | 2.138922 | 1.615673 | 1.887683 | 2.096696 | 1.537283 | 1.343324  |
| ENSMUSG Mphosph6  | 12.18107 | 10.51304 | 11.08715 | 8.887462 | 10.33695 | 9.589412  |
| ENSMUSG Rab3a     | 18.47087 | 19.15659 | 15.94529 | 11.61633 | 13.55824 | 12.316088 |
| ENSMUSG Cdh13     | 6.706463 | 6.419326 | 8.575195 | 3.282446 | 3.432229 | 3.924578  |
| ENSMUSG Upk1b     | 7.396764 | 8.154275 | 5.844977 | 6.227555 | 3.540846 | 6.404119  |
| ENSMUSG Lsm4      | 15.79994 | 15.3257  | 19.58705 | 22.40466 | 21.34116 | 21.358142 |
| ENSMUSG Comp      | 0.063585 | 0.161335 | 0.15607  | 0.162204 | 0.164515 | 0.42898   |
| ENSMUSG Gbp10     | 1.160874 | 1.057705 | 17.91349 | 9.024411 | 1.593576 | 2.410566  |
| ENSMUSG Efcab7    | 4.016648 | 3.452528 | 3.637209 | 2.953457 | 3.612389 | 2.947678  |
| ENSMUSG Alg6      | 3.223194 | 2.974758 | 2.375168 | 2.601704 | 2.960041 | 2.517375  |
| ENSMUSG IOC0044D1 | 0        | 0        | 0        | 0        | 0        | 0         |
| ENSMUSG 6430531B: | 1.652212 | 1.106192 | 0.462353 | 1.509222 | 2.316677 | 3.278098  |
| ENSMUSG Cenpi     | 0.198869 | 0.191177 | 0.246782 | 0.557781 | 0.7772   | 0.647648  |
| ENSMUSG Gla       | 4.797997 | 4.58357  | 3.790199 | 9.326842 | 10.41523 | 11.039588 |
| ENSMUSG Btk       | 4.338159 | 3.469862 | 4.602047 | 10.68396 | 10.02648 | 11.116619 |
| ENSMUSG Grb14     | 19.38964 | 21.41017 | 19.21171 | 15.60897 | 16.82655 | 17.251118 |
| ENSMUSG Rbm18     | 16.16202 | 16.15473 | 16.36395 | 12.67733 | 12.5984  | 13.770018 |
| ENSMUSG 4930568D  | 0        | 0        | 0        | 0        | 0        | 0         |
| ENSMUSG Dab2ip    | 34.64363 | 34.31238 | 34.05886 | 22.43597 | 22.9653  | 22.833126 |
| ENSMUSG Stom      | 41.5288  | 44.29136 | 43.31743 | 36.57692 | 37.39822 | 36.639946 |
| ENSMUSG Mrrf      | 5.471158 | 6.160462 | 6.441186 | 5.878432 | 5.891801 | 5.744878  |
| ENSMUSG Ttll11    | 0.596543 | 0.422067 | 0.341787 | 0.396303 | 0.470023 | 0.39012   |
| ENSMUSG Dcxr      | 58.42505 | 50.95013 | 43.97619 | 47.84463 | 36.49181 | 47.610358 |
| ENSMUSG Snx22     | 6.325107 | 8.915051 | 9.633905 | 10.03221 | 9.190687 | 10.192684 |
| ENSMUSG Ppl       | 20.80457 | 20.9808  | 18.34626 | 11.7747  | 11.32936 | 12.462035 |
| ENSMUSG Morc3     | 11.74123 | 11.77402 | 11.7895  | 12.18621 | 10.29392 | 11.580834 |
| ENSMUSG Mtmr12    | 9.235596 | 11.57905 | 7.825926 | 8.876455 | 9.899961 | 9.009994  |
| ENSMUSG Ksr2      | 0.008567 | 0.006772 | 0.01031  | 0.233168 | 0.171828 | 0.228223  |
| ENSMUSG Bcl7b     | 25.70052 | 26.16221 | 30.78774 | 23.45288 | 21.88276 | 22.1754   |
| ENSMUSG Hyal4     | 0        | 0        | 0        | 0        | 0        | 0         |
| ENSMUSG Lmod2     | 1.287768 | 4.016648 | 1.834616 | 1.295258 | 1.040507 | 0.723975  |
| ENSMUSG Spam1     | 0        | 0        | 0        | 0        | 0        | 0         |
| ENSMUSG Asb15     | 0.051622 | 0.160911 | 0.088921 | 0.105779 | 0        | 0         |
| ENSMUSG Wasl      | 25.7886  | 23.48539 | 21.37067 | 17.29387 | 17.8912  | 16.178    |

|                    |          |          |          |          |          |           |
|--------------------|----------|----------|----------|----------|----------|-----------|
| ENSMUSG Ezh2       | 4.178728 | 4.462511 | 4.594052 | 4.951619 | 5.17427  | 6.180656  |
| ENSMUSG Cul1       | 37.71624 | 35.76728 | 34.66437 | 31.97892 | 31.17211 | 32.51639  |
| ENSMUSG Npcd       | 0        | 0        | 0        | 0        | 0        | 0.051844  |
| ENSMUSG Shkbp1     | 9.240653 | 8.330104 | 8.276042 | 9.233225 | 8.38346  | 8.533339  |
| ENSMUSG Mrps10     | 13.9465  | 10.38772 | 11.62904 | 9.716931 | 11.61318 | 11.70214  |
| ENSMUSG Cnot6l     | 12.78095 | 13.57537 | 11.64519 | 11.99416 | 10.34632 | 10.604339 |
| ENSMUSG Tmx4       | 9.179587 | 9.326289 | 8.70105  | 9.121972 | 8.777524 | 8.871999  |
| ENSMUSG Sgpp1      | 14.02135 | 13.64265 | 13.16579 | 15.9813  | 15.06639 | 14.396307 |
| ENSMUSG Esr2       | 1.628384 | 1.09024  | 0.936302 | 0.429916 | 0.913201 | 0.775005  |
| ENSMUSG Tex21      | 0        | 0        | 0        | 0.032572 | 0        | 0         |
| ENSMUSG Akap5      | 75.87185 | 73.65505 | 64.43574 | 51.53728 | 47.85951 | 41.429262 |
| ENSMUSG Sult6b2    | 0        | 0        | 0        | 0        | 0        | 0         |
| ENSMUSG Ppp2r5e    | 14.42265 | 14.12299 | 13.18597 | 11.08956 | 12.70086 | 12.44997  |
| ENSMUSG Spata33    | 1.257603 | 1.243725 | 1.287947 | 1.265867 | 1.072998 | 2.399262  |
| ENSMUSG Gng11      | 57.10345 | 55.71404 | 63.64242 | 43.68127 | 39.47436 | 39.66037  |
| ENSMUSG Srsf9      | 22.32421 | 24.54446 | 24.4671  | 25.02873 | 27.28711 | 28.135532 |
| ENSMUSG Ilvbl      | 9.438495 | 9.790499 | 8.005658 | 9.517455 | 8.894845 | 9.885806  |
| ENSMUSG Selenbp1   | 475.1157 | 564.0099 | 428.1278 | 276.8982 | 309.4272 | 263.08247 |
| ENSMUSG Adam25     | 0        | 0        | 0        | 0        | 0        | 0         |
| ENSMUSG Ccr9       | 0.373049 | 0.353726 | 0.363946 | 0.683574 | 0.733637 | 0.543684  |
| ENSMUSG Gatc       | 13.21787 | 11.96154 | 13.13425 | 11.69569 | 11.90052 | 11.115287 |
| ENSMUSG Triap1     | 16.44428 | 18.10595 | 20.25479 | 18.57814 | 18.07673 | 16.076345 |
| ENSMUSG Trpa1      | 0        | 0        | 0        | 0        | 0.010948 | 0         |
| ENSMUSG Cgn        | 29.16662 | 26.93299 | 26.40571 | 18.00772 | 17.60294 | 18.836509 |
| ENSMUSG Mtus1      | 62.67356 | 65.78384 | 52.85225 | 37.93778 | 41.82448 | 37.617821 |
| ENSMUSG Sh3gl2     | 1.296415 | 1.042261 | 0.415276 | 0.747249 | 0.709137 | 0.738858  |
| ENSMUSG Tmprss12   | 0        | 0        | 0        | 0        | 0        | 0         |
| ENSMUSG Psip1      | 17.52744 | 17.96257 | 18.19892 | 18.22932 | 17.63392 | 16.958497 |
| ENSMUSG Lipg       | 12.84182 | 11.07268 | 18.23108 | 8.97502  | 10.52534 | 8.573074  |
| ENSMUSG Bnc2       | 0.959838 | 0.757227 | 0.548863 | 0.803262 | 0.78683  | 0.800651  |
| ENSMUSG Glipr2     | 7.350246 | 7.526235 | 9.801173 | 16.3118  | 13.77343 | 17.187167 |
| ENSMUSG Zfp629     | 5.955249 | 5.511897 | 5.349693 | 5.080499 | 5.250127 | 4.679389  |
| ENSMUSG Themis3    | 0.021361 | 0.054591 | 0.045222 | 0.067924 | 0        | 0.164928  |
| ENSMUSG Washc2     | 22.48564 | 20.46696 | 21.07741 | 19.59288 | 20.40847 | 19.69277  |
| ENSMUSG Lhcgr      | 0        | 0.020272 | 0.013534 | 0        | 0        | 0.008093  |
| ENSMUSG Erich4     | 0        | 0        | 0        | 0        | 0        | 0         |
| ENSMUSG Rec114     | 0.352894 | 0.360082 | 0.280919 | 0.142392 | 0.407851 | 0.450382  |
| ENSMUSG Amy2a5     | 0        | 0        | 0        | 0        | 0        | 0         |
| ENSMUSG Tlr7       | 2.988214 | 2.834297 | 3.508172 | 5.006521 | 5.589466 | 4.992561  |
| ENSMUSG 4932415D   | 0        | 0        | 0        | 0        | 0.003459 | 0         |
| ENSMUSG Btg1-ps1   | 0        | 0        | 0        | 0        | 0        | 0         |
| ENSMUSG Shroom2    | 5.791939 | 5.586121 | 4.797028 | 3.153103 | 4.533692 | 3.16776   |
| ENSMUSG 3110082J2  | 0        | 0        | 0        | 0        | 0        | 0         |
| ENSMUSG Yipf2      | 10.27989 | 11.72993 | 12.55235 | 12.7895  | 13.14139 | 11.522717 |
| ENSMUSG Tmed1      | 7.05418  | 9.83307  | 9.310805 | 8.432882 | 7.47985  | 8.904864  |
| ENSMUSG Scg3       | 0.261951 | 0.14583  | 0.102892 | 0.06237  | 0.046986 | 0         |
| ENSMUSG Tmod2      | 6.256239 | 6.019824 | 5.797063 | 3.85262  | 3.526596 | 3.438118  |
| ENSMUSG Smarca4    | 17.88828 | 18.0744  | 17.75281 | 18.62157 | 19.78832 | 20.885975 |
| ENSMUSG Lysmd2     | 26.36471 | 21.07167 | 27.38113 | 17.62546 | 15.18222 | 13.441428 |
| ENSMUSG Carm1      | 13.97946 | 12.62422 | 14.72624 | 12.29767 | 12.8982  | 13.316205 |
| ENSMUSG Olfr1165-ꜛ | 0        | 0        | 0        | 0        | 0        | 0         |
| ENSMUSG Npy5r      | 0        | 0        | 0        | 0        | 0        | 0         |
| ENSMUSG D17H6S53   | 5.768534 | 6.16848  | 5.624159 | 5.648783 | 5.758049 | 5.837196  |
| ENSMUSG Mageb3     | 0        | 0.017947 | 0        | 0        | 0        | 0         |
| ENSMUSG Cyp2c68    | 0        | 0        | 0        | 0        | 0        | 0         |
| ENSMUSG Serf2      | 79.69267 | 95.2848  | 91.19513 | 84.36685 | 88.52434 | 97.517778 |
| ENSMUSG Grk6       | 22.52326 | 21.275   | 22.79514 | 22.26488 | 20.41119 | 25.821334 |
| ENSMUSG Tbx21      | 1.413712 | 1.150001 | 4.622115 | 2.215838 | 0.903072 | 1.370521  |
| ENSMUSG Olfr1162   | 0        | 0        | 0        | 0        | 0        | 0         |
| ENSMUSG Acss1      | 22.81367 | 23.98982 | 17.46888 | 29.70383 | 29.91721 | 31.426403 |
| ENSMUSG Olfr1170   | 0        | 0        | 0        | 0        | 0        | 0         |
| ENSMUSG Olfr1164   | 0        | 0        | 0        | 0        | 0        | 0         |
| ENSMUSG Snph       | 0.128147 | 0.272194 | 0.161711 | 0.409837 | 0.369228 | 0.445594  |
| ENSMUSG Gins1      | 0.992398 | 1.013018 | 1.163126 | 1.325372 | 1.551075 | 2.224638  |

|                   |          |          |          |          |          |           |
|-------------------|----------|----------|----------|----------|----------|-----------|
| ENSMUSG Nsf1c     | 42.38018 | 42.62607 | 44.47531 | 36.39756 | 33.22441 | 36.283139 |
| ENSMUSG Olfr801   | 0        | 0        | 0        | 0        | 0        | 0         |
| ENSMUSG Olfr933   | 0        | 0        | 0        | 0        | 0        | 0         |
| ENSMUSG Slc25a45  | 7.850326 | 6.617965 | 7.089201 | 10.63555 | 9.377356 | 9.204735  |
| ENSMUSG Tjp2      | 38.17858 | 38.31033 | 34.08995 | 30.02668 | 30.85729 | 32.099096 |
| ENSMUSG Tnks2     | 33.17161 | 35.06479 | 31.43653 | 29.04554 | 31.13217 | 29.427071 |
| ENSMUSG Il33      | 29.14688 | 33.07248 | 23.69706 | 47.23437 | 57.90476 | 62.019266 |
| ENSMUSG Uhrf2     | 13.94735 | 14.57847 | 14.10598 | 13.5281  | 14.0996  | 13.698373 |
| ENSMUSG Frmd8     | 17.35579 | 15.05322 | 15.56178 | 13.34518 | 13.86958 | 14.047145 |
| ENSMUSG Trpd52l3  | 0        | 0        | 0        | 0        | 0        | 0         |
| ENSMUSG Thnsl1    | 2.094192 | 2.471031 | 2.119811 | 2.152312 | 1.869922 | 2.519729  |
| ENSMUSG Mcm3      | 8.418548 | 7.136435 | 7.478448 | 8.609838 | 9.512347 | 10.306013 |
| ENSMUSG Gm9857    | 0        | 0.050877 | 0        | 0        | 0.080758 | 0         |
| ENSMUSG Olfr922   | 0        | 0        | 0        | 0        | 0        | 0         |
| ENSMUSG Ccdc60    | 0.503206 | 0.745399 | 0.382145 | 0.86514  | 0.680086 | 0.960537  |
| ENSMUSG Il12b     | 0.23059  | 0.087394 | 0.284453 | 0.128759 | 0.254973 | 0.393691  |
| ENSMUSG Fam24b    | 0        | 0        | 0.026836 | 0        | 0.019493 | 0         |
| ENSMUSG Fam24a    | 0        | 0        | 0        | 0.046274 | 0        | 0         |
| ENSMUSG Ptpn5     | 0.29529  | 0.127863 | 0.159885 | 0.153024 | 0.13208  | 0.125211  |
| ENSMUSG Tacc2     | 28.67827 | 28.12634 | 26.34571 | 17.45358 | 15.46323 | 12.39912  |
| ENSMUSG Ate1      | 13.85337 | 14.22091 | 13.0018  | 10.85307 | 10.68485 | 11.03412  |
| ENSMUSG Ldhc      | 0        | 0        | 0        | 0.345238 | 0.114196 | 0.232451  |
| ENSMUSG Os9       | 69.07659 | 64.20117 | 67.49537 | 68.97218 | 69.83653 | 69.263144 |
| ENSMUSG Mybbp1a   | 17.2129  | 15.90076 | 15.49901 | 16.10697 | 14.32228 | 17.43717  |
| ENSMUSG Gtpbp10   | 3.963193 | 3.363065 | 3.754023 | 3.491553 | 3.501177 | 3.053114  |
| ENSMUSG Blvrb     | 17.04927 | 17.92794 | 18.19442 | 24.77755 | 23.75784 | 27.807471 |
| ENSMUSG Oas3      | 1.29875  | 0.846507 | 2.828064 | 1.138968 | 0.874808 | 0.93215   |
| ENSMUSG Pon2      | 40.14214 | 41.2656  | 42.24675 | 44.60665 | 46.0994  | 44.280743 |
| Mus_musc Mus_musc | 0.435075 | 0.36929  | 0.242109 | 0.301038 | 0.228546 | 0.15666   |
| Mus_musc Mus_musc | 1.424815 | 1.519514 | 2.187792 | 1.213537 | 0.84174  | 1.059489  |
| ENSMUSG Tnni1     | 0        | 0        | 0.03555  | 0        | 0        | 0         |
| Mus_musc Mus_musc | 0.226764 | 0.148722 | 0.136246 | 0.857456 | 1.778122 | 0.84275   |
| ENSMUSG Fcamr     | 0.898255 | 0.819091 | 0.670982 | 3.421426 | 2.598858 | 2.417043  |
| ENSMUSG Tnnt2     | 7.008276 | 46.0663  | 10.07514 | 21.17915 | 14.43595 | 10.929239 |
| ENSMUSG Pigr      | 9.477757 | 15.2785  | 7.15727  | 139.3461 | 163.5185 | 158.33418 |
| ENSMUSG Il20      | 0        | 0        | 0        | 0        | 0        | 0         |
| ENSMUSG Tmem9     | 17.15722 | 15.83228 | 13.20232 | 14.33272 | 14.41335 | 15.582839 |
| ENSMUSG Pkp1      | 0        | 0        | 0        | 0        | 0        | 0         |
| ENSMUSG Vmn1r20   | 0        | 0        | 0        | 0        | 0        | 0         |
| ENSMUSG Khgrp     | 19.10132 | 16.82558 | 18.10428 | 18.29682 | 17.14676 | 17.772683 |
| ENSMUSG Rtl9      | 0.111289 | 0.031471 | 0.047915 | 0.083531 | 0.082838 | 0.085271  |
| ENSMUSG Gm5926    | 0        | 0        | 0        | 0        | 0        | 0         |
| ENSMUSG Vmn1r169  | 0        | 0        | 0        | 0        | 0        | 0         |
| ENSMUSG Vmn2r50   | 0        | 0        | 0        | 0        | 0        | 0         |
| ENSMUSG Fam221a   | 4.573258 | 4.217061 | 5.163326 | 3.304119 | 3.253601 | 2.848979  |
| ENSMUSG Ankdd1b   | 0        | 0        | 0        | 0        | 0.010878 | 0         |
| ENSMUSG Myot      | 0        | 0        | 0        | 0.046872 | 0        | 0         |
| ENSMUSG Man1a     | 12.71979 | 14.10258 | 11.31376 | 30.27049 | 29.74579 | 29.171851 |
| ENSMUSG Dcp2      | 7.272271 | 7.172402 | 6.762282 | 6.884069 | 6.786288 | 6.56364   |
| ENSMUSG Ik        | 48.30863 | 48.50062 | 49.4615  | 45.0762  | 43.24486 | 41.68026  |
| ENSMUSG Pgggt1b   | 13.18289 | 11.59552 | 9.827657 | 12.11775 | 11.11993 | 9.765674  |
| ENSMUSG Mybl2     | 0.655561 | 0.385202 | 0.598056 | 0.983797 | 1.309554 | 1.233634  |
| Mus_musc Mus_musc | 0.792992 | 1.35827  | 1.367941 | 0.936629 | 1.144544 | 0.720229  |
| Mus_musc Mus_musc | 0.395206 | 0.273673 | 0        | 0.222139 | 0.249009 | 0.073261  |
| Mus_musc Mus_musc | 0.514715 | 0.659731 | 0.364574 | 0.556957 | 0.359766 | 0.324145  |
| Mus_musc Mus_musc | 0.887711 | 0.27105  | 0.434666 | 0.602106 | 0.970555 | 0.560918  |
| Mus_musc Mus_musc | 0.367796 | 0.591722 | 0.36512  | 0.196913 | 0.067053 | 0.321773  |
| Mus_musc Mus_musc | 0.483448 | 0.392002 | 0.249685 | 0.481258 | 0.26685  | 0.696782  |
| Mus_musc Mus_musc | 0.249569 | 0        | 0        | 0        | 0        | 0         |
| Mus_musc Mus_musc | 0        | 0.14489  | 0        | 0.237124 | 0        | 0         |
| Mus_musc Mus_musc | 0        | 0        | 0.41537  | 0        | 0.478966 | 0         |
| Mus_musc Mus_musc | 0        | 0.154309 | 0        | 0        | 0        | 0         |
| ENSMUSG Ndufa1    | 34.4387  | 30.48934 | 33.55459 | 54.25151 | 49.67443 | 52.563637 |
| Mus_musc Mus_musc | 0.351775 | 0        | 0.104177 | 0.121086 | 0        | 0         |

|                    |          |          |          |          |          |           |
|--------------------|----------|----------|----------|----------|----------|-----------|
| Mus_musc Mus_musc  | 0        | 0        | 0        | 0        | 0        | 0         |
| ENSMUSG Gm21094    | 0        | 0        | 0        | 0        | 0        | 0         |
| Mus_musc Mus_musc  | 0        | 0        | 0        | 0        | 0        | 0         |
| Mus_musc Mus_musc  | 0        | 0.265131 | 0        | 0        | 0        | 0         |
| Mus_musc Mus_musc  | 0.334182 | 0        | 0.026637 | 0.047927 | 0.294784 | 0.425857  |
| Mus_musc Mus_musc  | 0        | 0.196744 | 0        | 0        | 0        | 0         |
| Mus_musc Mus_musc  | 0        | 0.389677 | 0        | 0.228108 | 0        | 0.116282  |
| ENSMUSG Ethe1      | 5.385414 | 5.578552 | 7.380444 | 6.342912 | 7.496943 | 8.503968  |
| Mus_musc Mus_musc  | 0.188391 | 0.275129 | 0.112124 | 0.411452 | 0.098489 | 0         |
| ENSMUSG Olfr329-ps | 0        | 0        | 0        | 0        | 0        | 0         |
| Mus_musc Mus_musc  | 0        | 0.143046 | 0.152659 | 0        | 0.184512 | 0         |
| ENSMUSG Stum       | 0.298001 | 0.207295 | 0.339065 | 0.371006 | 0.196449 | 0.41191   |
| Mus_musc Mus_musc  | 0        | 0        | 0        | 0        | 0        | 0         |
| ENSMUSG Vmn1r13    | 0        | 0        | 0        | 0        | 0        | 0         |
| ENSMUSG Lgals4     | 1.97905  | 2.24752  | 2.489642 | 1.975472 | 1.080489 | 2.160665  |
| Mus_musc Mus_musc  | 0.104351 | 0.328557 | 0.185296 | 0.999842 | 0.103372 | 0.207963  |
| ENSMUSG Rbfox1     | 0.063148 | 0.394887 | 0.075003 | 0.076747 | 0        | 0.056682  |
| ENSMUSG Gm20481    | 0        | 0.000572 | 0.00557  | 0        | 0        | 0         |
| ENSMUSG Scnm1      | 7.666028 | 9.478455 | 9.836364 | 7.805302 | 8.284163 | 7.930406  |
| ENSMUSG Scgb2b11   | 0        | 0        | 0        | 0        | 0        | 0         |
| ENSMUSG Kcnn1      | 0.536045 | 0.326023 | 0.215739 | 0.363332 | 0.292655 | 0.387533  |
| ENSMUSG Gm10721    | 0        | 0        | 0        | 0        | 0        | 0         |
| ENSMUSG Olfr628    | 0        | 0        | 0        | 0        | 0        | 0         |
| ENSMUSG Gm29735    | 0        | 0        | 0        | 0        | 0        | 0         |
| ENSMUSG Gm4175     | 0        | 0        | 0        | 0        | 0        | 0         |
| ENSMUSG Lamb1      | 18.96076 | 17.42751 | 21.05541 | 15.34884 | 16.4187  | 15.890298 |
| ENSMUSG Acot12     | 0.106313 | 0.042944 | 0.063917 | 0.101576 | 0.016362 | 0.029513  |
| ENSMUSG Cmtm2a     | 0        | 0        | 0        | 0.201514 | 0.074953 | 0.159667  |
| ENSMUSG Slc6a8     | 15.09608 | 16.14723 | 15.24184 | 15.80025 | 17.40335 | 17.140985 |
| ENSMUSG Apeh       | 15.80731 | 15.64043 | 17.32099 | 17.41607 | 17.06355 | 18.64785  |
| ENSMUSG Top2b      | 15.05172 | 14.93431 | 14.2032  | 14.32832 | 13.40761 | 14.064648 |
| Mus_musc Mus_musc  | 0.06372  | 0        | 0.410238 | 0.52237  | 0.415466 | 0.216418  |
| ENSMUSG Kdelr2     | 32.32167 | 33.79786 | 35.77124 | 32.09662 | 35.06111 | 35.331532 |
| ENSMUSG Fam90a1a   | 0        | 0        | 0        | 0        | 0        | 0         |
| ENSMUSG Gm7861     | 0        | 0        | 0        | 0        | 0        | 0         |
| ENSMUSG Gm7849     | 0        | 0        | 0        | 0        | 0        | 0         |
| Mus_musc Mus_musc  | 0.134366 | 0.069704 | 0.098425 | 0.107173 | 0.189096 | 0.133594  |
| ENSMUSG Gm15293    | 0        | 0        | 0        | 0        | 0        | 0         |
| Mus_musc Mus_musc  | 0        | 0        | 0        | 0        | 0        | 0         |
| Mus_musc Mus_musc  | 0.14189  | 0.105043 | 0.202691 | 0.251572 | 0.24174  | 0.267258  |
| ENSMUSG Pifo       | 6.213265 | 7.882131 | 4.422406 | 8.769579 | 9.09497  | 9.173717  |
| ENSMUSG Gm20911    | 0        | 0        | 0        | 0        | 0        | 0         |
| ENSMUSG Scgb1b17   | 0        | 0        | 0        | 0        | 0        | 0         |
| ENSMUSG Gm10192    | 0        | 0        | 0        | 0        | 0        | 0         |
| ENSMUSG Krtap13    | 0        | 0        | 0        | 0        | 0        | 0         |
| ENSMUSG Il17d      | 2.364119 | 3.010847 | 2.558972 | 1.803949 | 1.92554  | 2.43548   |
| ENSMUSG Higd1c     | 0        | 0        | 0.136055 | 0        | 0        | 0         |
| ENSMUSG Ifi2712a   | 30.00711 | 25.71965 | 40.3745  | 29.86273 | 19.07044 | 31.578194 |
| ENSMUSG Pigm       | 4.940417 | 5.337825 | 4.960381 | 5.089108 | 4.716367 | 4.724594  |
| ENSMUSG Olfr318    | 0        | 0        | 0        | 0        | 0        | 0         |
| Mus_musc Mus_musc  | 0.73075  | 0.91741  | 0.348542 | 0.302605 | 24.81509 | 34.740864 |
| Mus_musc Mus_musc  | 7.947328 | 11.47273 | 3.134665 | 187.3676 | 443.5475 | 974.33014 |
| Mus_musc Mus_musc  | 0.098184 | 1.662374 | 0.351188 | 37.79532 | 3.925472 | 4.51475   |
| Mus_musc Mus_musc  | 0.072273 | 0.026083 | 0.092387 | 1.762975 | 1.413832 | 1.998374  |
| ENSMUSG Gm11032    | 0        | 0        | 0        | 0        | 0        | 0         |
| ENSMUSG Il12rb1    | 0.500448 | 0.393319 | 0.695394 | 0.6934   | 0.610698 | 0.806936  |
| ENSMUSG Shld2      | 2.449754 | 2.191099 | 1.79606  | 2.413528 | 3.070592 | 1.514835  |
| ENSMUSG Svs4       | 0        | 0        | 0        | 0        | 0        | 0         |
| ENSMUSG Smpx       | 0.212678 | 1.522066 | 0.157644 | 0.792598 | 0.36411  | 0.153968  |
| ENSMUSG Dcp1b      | 4.631877 | 3.84344  | 3.247141 | 3.516972 | 3.635502 | 2.689036  |
| ENSMUSG Syt15      | 4.893045 | 4.922447 | 10.98393 | 7.095538 | 3.722096 | 4.414655  |
| ENSMUSG Matn4      | 27.89255 | 26.81838 | 28.09748 | 21.08977 | 21.22542 | 23.169492 |
| ENSMUSG Alk        | 0        | 0        | 0        | 0.018346 | 0        | 0         |
| ENSMUSG Tceal8     | 31.96439 | 31.84245 | 29.56282 | 27.27567 | 29.6369  | 27.98332  |

|                          |          |          |          |          |          |           |
|--------------------------|----------|----------|----------|----------|----------|-----------|
| ENSMUSG Zfp790           | 6.871515 | 6.690054 | 6.993414 | 5.863199 | 6.477395 | 6.3955    |
| ENSMUSG Gm10477          | 0        | 0        | 0        | 0        | 0        | 0         |
| ENSMUSG Sdf2l1           | 12.75118 | 12.84938 | 19.0413  | 70.28274 | 69.63709 | 75.474388 |
| ENSMUSG Ccdc116          | 0.162242 | 0.121646 | 0.10945  | 0.160348 | 0.17591  | 0.101938  |
| ENSMUSG Serpind1         | 0.738824 | 0.965275 | 0.926077 | 3.020852 | 2.975813 | 2.372561  |
| ENSMUSG Snap29           | 13.34458 | 15.62575 | 13.85397 | 16.69225 | 14.98432 | 15.881964 |
| ENSMUSG Aifm3            | 1.03043  | 0.827197 | 0.71813  | 1.673319 | 1.151559 | 1.486298  |
| ENSMUSG Ncam2            | 0.129897 | 0.156991 | 0.054279 | 0.008464 | 0.055802 | 0.045674  |
| ENSMUSG Lztr1            | 27.93883 | 27.2647  | 26.63728 | 26.35746 | 28.71167 | 29.580506 |
| ENSMUSG Thap7            | 17.4183  | 18.4645  | 18.62015 | 16.11255 | 16.6814  | 18.5327   |
| ENSMUSG Zfp449           | 1.027734 | 0.795613 | 1.037118 | 0.999778 | 1.064716 | 0.970747  |
| ENSMUSG Ube2n            | 17.90493 | 19.41543 | 19.17898 | 17.34446 | 18.79724 | 18.640349 |
| ENSMUSG Olfr1555- $\rho$ | 0        | 0        | 0        | 0        | 0        | 0         |
| ENSMUSG Ap1g2            | 5.801952 | 5.089375 | 6.48507  | 6.892226 | 7.021697 | 8.054648  |
| ENSMUSG Cyp2s1           | 33.8967  | 39.80679 | 23.22127 | 30.44996 | 32.00528 | 33.189503 |
| ENSMUSG Pou6f2           | 0        | 0        | 0        | 0        | 0        | 0         |
| ENSMUSG Agmat            | 0        | 0.084667 | 0        | 0        | 0        | 0         |
| ENSMUSG Tfcp2            | 4.512318 | 5.568224 | 5.161835 | 4.02556  | 3.968908 | 4.797     |
| ENSMUSG 2310046Kz        | 0        | 0        | 0        | 0        | 0        | 0         |
| ENSMUSG Ube2k            | 11.11271 | 12.00576 | 11.35995 | 11.59459 | 9.745319 | 9.595098  |
| Mus_musc Mus_musc        | 0        | 0.391181 | 0        | 0        | 0        | 0         |
| ENSMUSG Limd1            | 17.3165  | 16.26036 | 15.2599  | 17.32744 | 18.12356 | 18.474567 |
| ENSMUSG Arih1            | 15.87679 | 17.36348 | 15.86079 | 15.64591 | 16.16991 | 16.888261 |
| ENSMUSG Bbs4             | 4.072098 | 5.022497 | 4.376003 | 3.961321 | 3.892587 | 4.612995  |
| ENSMUSG Adpgk            | 8.6032   | 7.679546 | 8.936641 | 8.406252 | 9.407659 | 9.846126  |
| ENSMUSG Parp6            | 9.230192 | 11.1313  | 10.41    | 9.220477 | 8.612575 | 9.206135  |
| ENSMUSG Sufu             | 8.247574 | 7.366023 | 7.064451 | 6.102549 | 7.032876 | 6.935309  |
| ENSMUSG Hexa             | 45.18102 | 41.15976 | 47.09761 | 92.96922 | 96.38062 | 107.81735 |
| ENSMUSG Olfr228          | 0        | 0        | 0        | 0        | 0        | 0         |
| ENSMUSG Zzz3             | 6.985618 | 7.308823 | 7.025464 | 7.303269 | 6.613902 | 7.267277  |
| ENSMUSG Mtg2             | 8.346185 | 8.685303 | 9.40329  | 5.984226 | 6.375026 | 7.35282   |
| ENSMUSG Anpep            | 19.02322 | 20.35499 | 17.95386 | 53.25953 | 49.95142 | 64.457757 |
| ENSMUSG Echdc3           | 3.754178 | 3.26638  | 2.100476 | 3.380224 | 2.76342  | 3.429088  |
| ENSMUSG Fam173b          | 3.916208 | 5.687137 | 4.845525 | 4.26857  | 4.533962 | 6.521383  |
| ENSMUSG Serpinb6a        | 85.85222 | 82.32776 | 79.38736 | 66.58858 | 66.65961 | 72.287189 |
| ENSMUSG Psmc7            | 45.69003 | 50.78497 | 52.18097 | 43.20895 | 42.63059 | 42.689823 |
| ENSMUSG Rsph9            | 8.117372 | 8.477106 | 7.387092 | 8.696485 | 6.760049 | 7.727052  |
| ENSMUSG Mrps18a          | 20.73415 | 23.38096 | 24.19377 | 22.51474 | 18.01394 | 20.583804 |
| ENSMUSG Calcrl           | 0.545006 | 0.456348 | 0.777201 | 0.329442 | 0.195176 | 0.410584  |
| ENSMUSG Fbxl17           | 6.261772 | 6.100197 | 6.033107 | 5.096289 | 4.774422 | 5.358268  |
| ENSMUSG Cyp39a1          | 8.170745 | 10.47304 | 6.964722 | 7.242236 | 7.981571 | 6.664248  |
| ENSMUSG Enpp5            | 31.387   | 30.70706 | 26.16431 | 24.00246 | 22.98513 | 23.300185 |
| ENSMUSG Enpp4            | 19.88671 | 20.09413 | 21.52471 | 16.31347 | 15.54379 | 14.385067 |
| ENSMUSG D430041D         | 0.176442 | 0.14997  | 0.165793 | 0.200448 | 0.142051 | 0.183728  |
| ENSMUSG Crip3            | 0.321651 | 0.222146 | 0.131929 | 0.285656 | 0.253529 | 0.727783  |
| ENSMUSG Gm17677          | 0        | 0        | 0        | 0        | 0        | 0         |
| ENSMUSG 9130204Lc        | 0        | 0        | 0        | 0        | 0        | 0         |
| ENSMUSG Crhr1            | 0        | 0        | 0        | 0        | 0        | 0         |
| ENSMUSG Olfr556          | 0        | 0        | 0        | 0        | 0        | 0         |
| ENSMUSG Trim68           | 6.675312 | 6.08016  | 5.510611 | 5.960492 | 4.724358 | 5.219205  |
| ENSMUSG Olfr557          | 0        | 0.009489 | 0        | 0        | 0        | 0         |
| ENSMUSG Olfr561          | 0.05267  | 0        | 0        | 0        | 0        | 0         |
| ENSMUSG Olfr568          | 0        | 0        | 0        | 0        | 0        | 0         |
| ENSMUSG Olfr570          | 0        | 0        | 0        | 0        | 0        | 0         |
| ENSMUSG Olfr572          | 0        | 0        | 0        | 0        | 0        | 0         |
| ENSMUSG Olfr576          | 0        | 0        | 0        | 0        | 0        | 0         |
| ENSMUSG Olfr582          | 0        | 0        | 0        | 0        | 0        | 0         |
| ENSMUSG Cts7             | 0        | 0        | 0        | 0        | 0        | 0         |
| ENSMUSG 1700030Kc        | 2.718678 | 2.331677 | 2.477139 | 2.782592 | 2.88152  | 2.872443  |
| ENSMUSG Nup107           | 6.788786 | 6.622043 | 7.878046 | 6.665271 | 6.380355 | 6.715358  |
| ENSMUSG Soga3            | 0        | 0        | 0        | 0        | 0.013644 | 0.047112  |
| ENSMUSG Dido1            | 10.79164 | 11.08774 | 10.86466 | 10.34922 | 10.57806 | 10.920989 |
| ENSMUSG Lhfpl3           | 0.481155 | 0.456835 | 0.175064 | 0.110555 | 0.302783 | 0.230129  |
| ENSMUSG Plcl2            | 2.770757 | 2.061752 | 2.495613 | 3.616002 | 4.230868 | 4.065103  |

|                   |          |          |          |          |          |           |
|-------------------|----------|----------|----------|----------|----------|-----------|
| ENSMUSG Ceacam3   | 0        | 0        | 0        | 0        | 0        | 0         |
| ENSMUSG Dand5     | 2.420905 | 2.373479 | 2.133032 | 2.01316  | 1.958266 | 1.857909  |
| ENSMUSG Actr6     | 4.88495  | 4.391669 | 5.21225  | 4.82418  | 3.461418 | 3.789081  |
| ENSMUSG Atp2b1    | 36.48285 | 37.7984  | 33.4436  | 29.65145 | 31.58073 | 29.722553 |
| ENSMUSG Cdk1      | 0.447923 | 0.380154 | 0.485422 | 1.427498 | 1.932426 | 2.432458  |
| ENSMUSG Cabcoco1  | 1.737767 | 1.753437 | 1.309184 | 2.953432 | 3.566824 | 3.019628  |
| ENSMUSG Rhobtb1   | 8.658441 | 7.844885 | 5.554272 | 4.978958 | 5.067612 | 4.444372  |
| ENSMUSG Arid5b    | 21.37445 | 19.0137  | 15.34359 | 12.65767 | 12.8153  | 11.44153  |
| ENSMUSG 4930486L2 | 0        | 0        | 0        | 0        | 0        | 0.891434  |
| ENSMUSG Olfr963   | 0        | 0        | 0        | 0        | 0        | 0         |
| ENSMUSG Cadm2     | 0.605085 | 0.577755 | 0.290541 | 0.094486 | 0.077265 | 0.083254  |
| ENSMUSG Magea6    | 0        | 0        | 0        | 0        | 0        | 0         |
| ENSMUSG Cadm4     | 4.544775 | 5.118019 | 4.157854 | 4.203525 | 3.496875 | 3.385712  |
| ENSMUSG Kih18     | 8.540197 | 8.053813 | 8.829809 | 7.177297 | 7.365272 | 7.799272  |
| ENSMUSG Olfr313   | 0        | 0        | 0        | 0        | 0        | 0         |
| ENSMUSG Wdpcp     | 3.425177 | 3.254304 | 2.50937  | 3.331071 | 3.135683 | 3.195278  |
| ENSMUSG Sptbn1    | 330.8662 | 334.2255 | 282.9066 | 197.8498 | 213.0529 | 193.93953 |
| ENSMUSG Serpinh1  | 103.4271 | 134.6156 | 135.1729 | 92.6095  | 101.0668 | 108.92571 |
| ENSMUSG Theg      | 0        | 0        | 0        | 0        | 0        | 0         |
| ENSMUSG Madcam1   | 0        | 0.046422 | 0.035293 | 0        | 0.117053 | 0.027705  |
| ENSMUSG Erlec1    | 12.42199 | 12.99208 | 12.03448 | 16.53084 | 16.60868 | 15.888885 |
| ENSMUSG Shc2      | 0.743371 | 0.635223 | 0.54593  | 0.471824 | 0.691931 | 0.624092  |
| ENSMUSG Olfr724   | 0        | 0        | 0        | 0        | 0        | 0         |
| ENSMUSG Dynlt1b   | 41.52696 | 43.53885 | 39.96785 | 52.65345 | 53.90079 | 48.625057 |
| ENSMUSG Gm21093   | 0.061852 | 0.039856 | 0.025442 | 0.030326 | 0.03319  | 0.043128  |
| ENSMUSG Ccer2     | 0        | 0        | 0        | 0        | 0        | 0         |
| ENSMUSG Bcl11b    | 1.45839  | 1.187778 | 1.633436 | 1.329268 | 1.529152 | 2.176373  |
| ENSMUSG Gm3106    | 0        | 0        | 0        | 0        | 0        | 0         |
| Mus_musc Mus_musc | 0        | 0        | 0.171608 | 0        | 0.17068  | 0.043662  |
| ENSMUSG Ddx19b    | 3.721697 | 4.178539 | 3.412094 | 3.761837 | 3.614913 | 4.083243  |
| ENSMUSG Vps8      | 5.630905 | 5.991462 | 5.615976 | 5.378436 | 5.420007 | 5.764179  |
| ENSMUSG Chrng     | 0        | 0        | 0        | 0        | 0        | 0         |
| ENSMUSG Chrnd     | 0        | 0        | 0        | 0.03522  | 0.037414 | 0         |
| ENSMUSG Efhd1     | 0.116227 | 0.412989 | 0.285205 | 0.447336 | 0.119729 | 0.214395  |
| ENSMUSG Eif4e2    | 18.70721 | 18.62655 | 20.07306 | 20.68775 | 19.80444 | 24.17544  |
| ENSMUSG Ngef      | 5.133531 | 4.853385 | 3.273661 | 3.821327 | 3.927424 | 3.48084   |
| ENSMUSG Snorc     | 0        | 0        | 0        | 0        | 0        | 0         |
| ENSMUSG Cd226     | 1.831359 | 1.881436 | 2.402807 | 2.493193 | 1.479935 | 1.537062  |
| ENSMUSG Cct2      | 64.71839 | 67.24776 | 69.38932 | 67.59184 | 70.56181 | 68.590058 |
| ENSMUSG Fancd2    | 0.349113 | 0.321048 | 0.243995 | 0.699544 | 0.679148 | 0.566092  |
| ENSMUSG Cpsf1     | 14.55741 | 13.31735 | 15.76026 | 13.25877 | 12.53748 | 12.922702 |
| ENSMUSG Pds5b     | 9.931859 | 10.20373 | 9.632636 | 8.303184 | 8.459874 | 7.712316  |
| ENSMUSG Zfp865    | 6.953978 | 5.164219 | 5.53873  | 4.520718 | 4.906474 | 5.325885  |
| ENSMUSG Zfp628    | 3.486454 | 3.384598 | 4.027231 | 3.260247 | 2.872561 | 3.566459  |
| ENSMUSG Vmn1r59   | 0        | 0        | 0        | 0        | 0        | 0         |
| ENSMUSG Hist2h3b  | 1.821437 | 0.763799 | 1.217601 | 0.722928 | 0.910156 | 1.46833   |
| ENSMUSG Vmn1r55   | 0        | 0        | 0        | 0        | 0        | 0         |
| ENSMUSG Olfr51    | 0        | 0        | 0        | 0        | 0        | 0         |
| ENSMUSG Trim55    | 0.06275  | 0.586197 | 0.128834 | 0.263807 | 0.073526 | 0.081482  |
| ENSMUSG Zfp777    | 10.23702 | 10.4568  | 10.75785 | 8.256046 | 8.838096 | 8.869368  |
| ENSMUSG Rpp14     | 8.802273 | 8.456266 | 8.077951 | 8.054636 | 7.71228  | 7.555326  |
| ENSMUSG Psg18     | 0        | 0        | 0        | 0        | 0        | 0         |
| ENSMUSG Tmem52    | 0.159477 | 0.370663 | 0.453522 | 0.628207 | 0.564892 | 0.601688  |
| ENSMUSG Olfr94    | 0        | 0        | 0        | 0        | 0        | 0         |
| ENSMUSG Lrrc69    | 0        | 0        | 0        | 0        | 0.059826 | 0         |
| ENSMUSG Ccnb1ip1  | 0.074764 | 0.224766 | 0        | 1.281455 | 0.606845 | 0.739329  |
| ENSMUSG Psg29     | 0        | 0        | 0        | 0        | 0        | 0         |
| ENSMUSG Hist1h2ad | 0.098618 | 1.059675 | 1.139357 | 0.653409 | 0.817833 | 0.976862  |
| ENSMUSG Atp2b2    | 1.920837 | 2.631044 | 0.950223 | 2.638099 | 2.777038 | 3.234191  |
| ENSMUSG Far2      | 0.350321 | 0.212551 | 0.646194 | 0.473297 | 0.514246 | 0.44244   |
| ENSMUSG Ccdc91    | 11.88248 | 13.32375 | 13.54279 | 12.64323 | 11.23028 | 12.106834 |
| ENSMUSG Tmtc1     | 29.27111 | 27.07119 | 24.04277 | 14.56009 | 15.05368 | 13.321649 |
| ENSMUSG Tmem100   | 376.1449 | 335.644  | 351.1103 | 174.7911 | 198.9335 | 165.20966 |
| ENSMUSG Ergic2    | 11.11806 | 11.41254 | 11.85158 | 12.27859 | 11.94481 | 12.756624 |

|                   |          |          |          |          |          |           |
|-------------------|----------|----------|----------|----------|----------|-----------|
| ENSMUSG Caprin2   | 1.465106 | 1.999568 | 1.023629 | 1.069196 | 1.019682 | 1.425683  |
| ENSMUSG Msi2      | 12.63263 | 14.94157 | 10.41424 | 12.56774 | 13.21182 | 11.942469 |
| ENSMUSG Gata6     | 18.16558 | 14.62131 | 12.98431 | 11.02887 | 10.797   | 11.018835 |
| ENSMUSG Heatr3    | 8.599358 | 8.99847  | 9.020858 | 9.144385 | 8.130305 | 8.164816  |
| ENSMUSG Cbln1     | 0        | 0        | 0        | 0.040894 | 0.106215 | 0.09479   |
| ENSMUSG N4bp1     | 12.48351 | 12.47561 | 13.19278 | 11.75606 | 11.59904 | 12.051714 |
| ENSMUSG Triml1    | 0        | 0        | 0        | 0        | 0        | 0         |
| Mus_musc Mus_musc | 0.124833 | 0        | 0.111955 | 0.124002 | 0        | 0         |
| ENSMUSG Adcy7     | 17.58422 | 14.94139 | 16.44962 | 20.87557 | 19.77063 | 23.353588 |
| ENSMUSG Ptrh2     | 3.757225 | 3.954238 | 3.3661   | 3.033286 | 3.318457 | 3.616004  |
| ENSMUSG Gm7489    | 0        | 0        | 0        | 0        | 0        | 0         |
| Mus_musc Mus_musc | 0.576117 | 1.01425  | 0.408587 | 0.771659 | 0.733109 | 0.827806  |
| ENSMUSG Egfl7     | 348.2033 | 292.0762 | 341.2523 | 193.9183 | 200.48   | 206.95553 |
| ENSMUSG Acnat1    | 0.127069 | 0.215971 | 0.06762  | 0.173203 | 0.11209  | 0.325121  |
| ENSMUSG Notch1    | 38.84378 | 33.63858 | 34.23318 | 21.52686 | 23.49101 | 24.299395 |
| ENSMUSG Agpat2    | 16.21589 | 17.06238 | 17.1376  | 16.16048 | 16.64498 | 15.492596 |
| ENSMUSG Inpp5e    | 7.504837 | 7.706616 | 7.693326 | 6.828606 | 6.80173  | 6.228928  |
| ENSMUSG Sec16a    | 13.58627 | 14.07663 | 12.26469 | 13.3629  | 14.97701 | 14.512837 |
| ENSMUSG Entr1     | 27.15559 | 24.94333 | 28.165   | 22.51981 | 23.91698 | 22.674528 |
| ENSMUSG Olfr270   | 0        | 0        | 0        | 0        | 0        | 0         |
| ENSMUSG Card9     | 6.168214 | 5.690364 | 7.162056 | 6.299619 | 6.21709  | 6.602931  |
| ENSMUSG 4921530L2 | 0        | 0        | 0        | 0        | 0        | 0         |
| ENSMUSG Ppp1r1c   | 0        | 0        | 0        | 0        | 0        | 0         |
| ENSMUSG Rnps1     | 15.79723 | 16.68736 | 18.40249 | 13.20735 | 13.27718 | 16.597887 |
| ENSMUSG Fras1     | 0.891975 | 0.76716  | 0.588505 | 0.646153 | 0.471025 | 0.89162   |
| ENSMUSG Prr7      | 0.689587 | 0.457591 | 0.743742 | 0.754966 | 0.88332  | 1.03044   |
| ENSMUSG Fam171a2  | 2.376571 | 1.818095 | 1.637758 | 1.165917 | 1.795028 | 1.642672  |
| ENSMUSG Sema3f    | 91.21391 | 86.03171 | 118.1381 | 62.25985 | 68.01919 | 58.484424 |
| ENSMUSG Ngdn      | 21.01314 | 22.01543 | 24.79044 | 18.69296 | 19.62609 | 20.362255 |
| ENSMUSG Sub1      | 18.92886 | 20.35663 | 20.36496 | 26.28077 | 23.83273 | 23.328402 |
| ENSMUSG Npr3      | 25.7112  | 23.29739 | 17.20005 | 15.50776 | 18.38173 | 14.967509 |
| ENSMUSG Golph3    | 56.33491 | 52.12917 | 49.15069 | 48.98608 | 50.42817 | 49.675062 |
| ENSMUSG Zfr       | 23.93726 | 26.25385 | 21.70997 | 21.9408  | 22.3687  | 22.012728 |
| ENSMUSG Efs       | 1.587588 | 1.899613 | 1.805393 | 1.992703 | 2.153587 | 1.878116  |
| ENSMUSG Jph4      | 0.071605 | 0.101375 | 0.078503 | 0.109755 | 0.042922 | 0.127608  |
| ENSMUSG Dhrrs2    | 0        | 0        | 0        | 0        | 0        | 0         |
| ENSMUSG Shq1      | 1.689317 | 1.698955 | 1.449925 | 2.522749 | 2.230582 | 3.135332  |
| ENSMUSG Hacd2     | 4.715427 | 5.599437 | 5.506677 | 5.421875 | 5.452968 | 5.338082  |
| ENSMUSG Gm49322   | 0.481233 | 1.121019 | 0.37693  | 2.902717 | 0.801267 | 1.584388  |
| ENSMUSG Ssx9      | 0        | 0        | 0        | 0        | 0        | 0         |
| ENSMUSG 1810055G  | 6.64984  | 7.286071 | 7.175298 | 5.905916 | 6.08258  | 7.009452  |
| ENSMUSG Ccl7      | 0.768595 | 0.32403  | 0.378155 | 1.435796 | 2.669165 | 2.893173  |
| ENSMUSG Becn1     | 27.45227 | 26.85371 | 26.49074 | 30.958   | 25.09086 | 25.687631 |
| ENSMUSG 1700020L2 | 12.03283 | 8.447721 | 10.72217 | 3.116247 | 7.653388 | 5.232808  |
| ENSMUSG Vmn2r65   | 0        | 0        | 0        | 0        | 0        | 0         |
| ENSMUSG Zfp747    | 6.184995 | 6.202665 | 6.272836 | 4.716611 | 5.182921 | 5.124045  |
| ENSMUSG Btf3l4    | 10.56365 | 11.35381 | 10.56303 | 10.34572 | 9.496861 | 9.194607  |
| ENSMUSG Zfp72     | 1.409115 | 1.648213 | 1.399162 | 1.388337 | 0.964208 | 0.992813  |
| ENSMUSG Tm2d1     | 16.31688 | 17.37522 | 17.48267 | 17.64485 | 17.58152 | 14.832043 |
| ENSMUSG Dapk3     | 19.40336 | 15.78925 | 21.61366 | 15.836   | 18.95549 | 19.356784 |
| ENSMUSG Zdhhc11   | 0        | 0        | 0        | 0        | 0.093469 | 0         |
| ENSMUSG Txndc12   | 34.41101 | 32.49749 | 30.74452 | 31.87886 | 32.09707 | 31.963362 |
| ENSMUSG Nfia      | 4.178484 | 4.770189 | 3.690706 | 3.821121 | 3.389686 | 3.085475  |
| ENSMUSG Ifna2     | 0        | 0        | 0        | 0        | 0        | 0         |
| ENSMUSG Zfp319    | 11.02635 | 10.69853 | 10.97926 | 7.466197 | 7.719314 | 7.578302  |
| ENSMUSG Pde12     | 3.199467 | 2.794536 | 2.802416 | 2.870889 | 3.425255 | 3.503544  |
| ENSMUSG Capn13    | 0.228026 | 0.403837 | 0.029018 | 0.212561 | 0.208333 | 0.164034  |
| ENSMUSG Spin2c    | 0.856367 | 0.578453 | 0.508486 | 0.550869 | 0.657378 | 0.314763  |
| ENSMUSG Atg4c     | 5.923519 | 5.697785 | 5.643509 | 4.894737 | 5.841466 | 6.469115  |
| Mus_musc Mus_musc | 0.3925   | 0.425865 | 0.060653 | 0        | 0.113036 | 0         |
| Mus_musc Mus_musc | 0.881737 | 0.477692 | 0.81938  | 0.161467 | 0.436339 | 0.289885  |
| Mus_musc Mus_musc | 0.395966 | 0        | 0.861295 | 0.231534 | 0        | 0.274484  |
| Mus_musc Mus_musc | 0        | 0.884569 | 0.431098 | 0        | 0        | 0.33326   |
| Mus_musc Mus_musc | 0.579275 | 0.264905 | 0.504416 | 0.205566 | 0.276601 | 0.793618  |

|                   |          |          |          |          |          |           |
|-------------------|----------|----------|----------|----------|----------|-----------|
| Mus_musc Mus_musc | 0.249599 | 0.204835 | 0        | 0.107028 | 0        | 0         |
| ENSMUSG Napa      | 37.15972 | 36.10034 | 36.84329 | 34.53494 | 35.83793 | 34.928539 |
| ENSMUSG Kptn      | 5.297757 | 6.01792  | 6.777449 | 4.157011 | 6.054559 | 5.198402  |
| ENSMUSG Ttc39a    | 5.13994  | 6.404257 | 3.59085  | 9.402089 | 8.747426 | 8.566417  |
| ENSMUSG Abhd14b   | 15.46648 | 15.15739 | 16.16469 | 12.42546 | 11.3     | 12.033105 |
| ENSMUSG Hnrnpf    | 169.03   | 153.7793 | 199.4051 | 159.7592 | 169.3477 | 164.53847 |
| ENSMUSG Svop      | 0        | 0        | 0.030097 | 0        | 0.029338 | 0.015099  |
| ENSMUSG Malt1     | 5.611856 | 5.328045 | 5.704525 | 8.973628 | 9.776451 | 10.736609 |
| ENSMUSG 6820408C  | 2.528193 | 2.971018 | 1.733215 | 3.753195 | 4.492389 | 4.753036  |
| ENSMUSG Pwwp2a    | 6.779293 | 6.481911 | 6.231484 | 6.589939 | 5.282194 | 6.111972  |
| ENSMUSG Mylk4     | 0.424359 | 1.934561 | 0.477967 | 0.782166 | 0.659775 | 0.227085  |
| ENSMUSG Kctd21    | 5.634541 | 6.067902 | 6.090644 | 5.372616 | 5.214167 | 4.842     |
| ENSMUSG Pp2d1     | 0.039426 | 0.069589 | 0.042729 | 0.025642 | 0        | 0.022193  |
| ENSMUSG Olfr1033  | 2.516706 | 1.932772 | 1.666374 | 0.831443 | 0.733575 | 2.119693  |
| ENSMUSG Olfr1499  | 0        | 0        | 0        | 0        | 0        | 0         |
| ENSMUSG Epcam     | 37.36564 | 35.8     | 31.7922  | 34.32773 | 38.22006 | 36.908528 |
| ENSMUSG Gm47429   | 0        | 0        | 0        | 0        | 0        | 0         |
| ENSMUSG Ephb1     | 0.506536 | 0.318637 | 0.319019 | 0.263224 | 0.095686 | 0.130316  |
| ENSMUSG Trak1     | 41.92288 | 44.45167 | 39.78847 | 33.9107  | 36.27325 | 37.090402 |
| ENSMUSG Znhit6    | 5.072803 | 4.356696 | 4.193515 | 3.647281 | 4.145388 | 2.992235  |
| ENSMUSG Cep63     | 6.976161 | 6.300332 | 6.070974 | 5.501852 | 6.134936 | 5.564619  |
| ENSMUSG Cck       | 0        | 0        | 0        | 0        | 0        | 0         |
| ENSMUSG Amotl2    | 87.45408 | 74.8493  | 82.69656 | 45.14413 | 45.95376 | 51.554941 |
| ENSMUSG Lyzl4     | 0.065992 | 0.248816 | 0.165413 | 0.558314 | 0.147888 | 0.282191  |
| ENSMUSG Usf2      | 39.42399 | 29.89424 | 36.61046 | 32.29059 | 33.54777 | 35.508177 |
| ENSMUSG Arhgap35  | 16.9666  | 18.22657 | 14.55105 | 12.97478 | 13.73611 | 13.606182 |
| ENSMUSG Pigb      | 3.669654 | 3.928926 | 3.713104 | 3.824939 | 3.987726 | 3.752835  |
| ENSMUSG Olfr1176  | 0        | 0        | 0        | 0        | 0        | 0         |
| ENSMUSG Amz1      | 4.354595 | 4.2077   | 4.558402 | 4.189649 | 4.497    | 4.524833  |
| ENSMUSG 4933403O  | 0        | 0.07888  | 0.05567  | 0        | 0.036847 | 0         |
| ENSMUSG Gm15737   | 0.043701 | 0.027662 | 0.054255 | 0.035861 | 0.036727 | 0.039817  |
| ENSMUSG Rap2c     | 13.03342 | 12.35375 | 13.51856 | 12.20126 | 11.69953 | 12.278079 |
| ENSMUSG Col4a3    | 36.35769 | 33.2883  | 32.05538 | 25.98181 | 25.46679 | 22.171585 |
| ENSMUSG Prdm12    | 0        | 0        | 0        | 0        | 0        | 0         |
| Mus_musc Mus_musc | 0        | 0        | 0        | 0        | 0        | 0         |
| Mus_musc Mus_musc | 3.500511 | 4.004388 | 1.563588 | 2.979428 | 1.334189 | 1.648375  |
| Mus_musc Mus_musc | 0.22826  | 0.119117 | 0.126608 | 0.220513 | 0.09585  | 0.066597  |
| Mus_musc Mus_musc | 0.10067  | 0.404117 | 0.312731 | 0.094746 | 0        | 0         |
| Mus_musc Mus_musc | 0.385626 | 0.298414 | 0.064653 | 0.20155  | 0.327627 | 0.482741  |
| ENSMUSG Fmn1      | 1.122272 | 1.057476 | 1.010834 | 1.877428 | 2.104044 | 2.461788  |
| Mus_musc Mus_musc | 0.404117 | 0.263266 | 0.275161 | 0        | 0        | 0.162495  |
| ENSMUSG Olfr1497  | 0        | 0        | 0        | 0        | 0        | 0         |
| ENSMUSG Krt13     | 0.180074 | 0        | 0        | 0        | 0        | 0         |
| Mus_musc Mus_musc | 2.49687  | 1.684783 | 0.956582 | 0.627158 | 0.60063  | 1.050828  |
| ENSMUSG Fhad1     | 4.942445 | 6.259585 | 4.411298 | 6.764042 | 5.232175 | 6.454619  |
| Mus_musc Mus_musc | 0        | 0.154309 | 0        | 0        | 0        | 0         |
| Mus_musc Mus_musc | 0        | 0        | 0        | 0.063485 | 0.316222 | 0.120591  |
| Mus_musc Mus_musc | 0.148039 | 0        | 0.094682 | 0.183458 | 0.136922 | 0.110097  |
| ENSMUSG Fbxw26    | 0        | 0        | 0        | 0        | 0        | 0         |
| ENSMUSG Lrrc18    | 1.008962 | 1.144699 | 0.715449 | 1.105278 | 1.593019 | 0.82824   |
| ENSMUSG Rims1     | 0.0318   | 0        | 0.134772 | 0.025869 | 0.049632 | 0.03646   |
| ENSMUSG Pyroxd1   | 4.537157 | 4.378009 | 3.932716 | 5.122447 | 3.442733 | 3.84911   |
| ENSMUSG B3galt6   | 1.436988 | 1.348946 | 0.873014 | 1.288069 | 1.207697 | 1.477546  |
| ENSMUSG Lrrc29    | 0.955185 | 0.509363 | 0.807158 | 0.407966 | 0.493637 | 0.903709  |
| ENSMUSG Nr1h4     | 0.258043 | 0.295819 | 0.116568 | 0.112507 | 0.188199 | 0.320843  |
| ENSMUSG Apof      | 0        | 0.034548 | 0.071494 | 0        | 0        | 0         |
| ENSMUSG Fgfbp3    | 1.617367 | 0.966958 | 1.191801 | 0.787394 | 0.806823 | 0.844221  |
| ENSMUSG 2810006K  | 4.380678 | 5.041686 | 4.999227 | 4.716904 | 4.934094 | 4.945293  |
| ENSMUSG Cdc2      | 0        | 0        | 0        | 0        | 0        | 0         |
| ENSMUSG Ctnnbl1   | 10.55891 | 12.48784 | 10.43376 | 10.57989 | 11.45941 | 10.680841 |
| ENSMUSG Ghrh      | 0        | 0        | 0        | 0        | 0        | 0         |
| ENSMUSG Rpn2      | 78.17566 | 74.745   | 76.83827 | 83.7591  | 88.72224 | 91.343143 |
| ENSMUSG Rbl1      | 4.222238 | 4.544231 | 4.818607 | 4.975781 | 5.342676 | 4.738667  |
| ENSMUSG Src       | 15.95612 | 15.54822 | 15.43909 | 17.34839 | 17.18108 | 18.646176 |



|                   |          |          |          |          |          |           |
|-------------------|----------|----------|----------|----------|----------|-----------|
| ENSMUSG Olfr869   | 0        | 0        | 0        | 0        | 0        | 0         |
| ENSMUSG Rnf207    | 0        | 0.226277 | 0.069289 | 0.226179 | 0.087334 | 0.061995  |
| ENSMUSG Pip       | 0        | 0        | 0        | 0        | 0        | 0         |
| ENSMUSG Clcn3     | 11.94257 | 13.01718 | 10.79171 | 13.19656 | 12.71192 | 11.437042 |
| ENSMUSG Clcn5     | 2.61976  | 2.797681 | 1.422507 | 4.056624 | 3.276848 | 4.241523  |
| ENSMUSG Zfand6    | 22.77026 | 23.46218 | 24.02571 | 23.62162 | 23.38577 | 22.951595 |
| ENSMUSG Crls1     | 6.698034 | 7.215275 | 5.577395 | 7.657268 | 6.657241 | 7.413161  |
| ENSMUSG Ofcc1     | 0        | 0        | 0        | 0        | 0        | 0         |
| ENSMUSG Tmem198l  | 5.176463 | 4.344018 | 5.606253 | 5.081972 | 4.310686 | 4.038312  |
| ENSMUSG Lce1k     | 0        | 0        | 0        | 0        | 0        | 0         |
| ENSMUSG Gm15128   | 0        | 0        | 0        | 0        | 0        | 0         |
| ENSMUSG Rnf31     | 12.03107 | 10.45116 | 14.91081 | 11.21054 | 8.89784  | 9.583728  |
| ENSMUSG Nqo2      | 6.671019 | 7.272475 | 5.75406  | 7.431724 | 7.354651 | 7.594387  |
| ENSMUSG Mageb16   | 0        | 0        | 0        | 0        | 0        | 0         |
| ENSMUSG Adck2     | 5.391861 | 5.196183 | 4.621704 | 4.102648 | 3.947634 | 4.349799  |
| ENSMUSG Rpl38     | 103.0448 | 102.3918 | 92.4907  | 127.6642 | 76.81897 | 107.62361 |
| ENSMUSG Usp17ld   | 0        | 0        | 0        | 0        | 0        | 0         |
| ENSMUSG Chgb      | 0.109731 | 0.254272 | 0.135951 | 0.094248 | 0.079583 | 0.03314   |
| ENSMUSG Bcl2      | 3.755828 | 3.254321 | 4.265679 | 3.738691 | 3.399394 | 2.942388  |
| ENSMUSG Aloxe3    | 0.271241 | 0.302945 | 0.208386 | 0.325322 | 0.190217 | 0.187176  |
| ENSMUSG Gdf1      | 0.007064 | 0.03888  | 0.481839 | 0.330868 | 0        | 0.010486  |
| ENSMUSG Gm21788   | 0        | 0        | 0        | 0        | 0        | 0         |
| Mus_musc Mus_musc | 0        | 0        | 0        | 0        | 0        | 0.293791  |
| ENSMUSG Olfr866   | 0        | 0        | 0        | 0        | 0        | 0         |
| ENSMUSG Dpp6      | 0.329752 | 0.340488 | 0.16797  | 0.309921 | 0.535584 | 0.299791  |
| ENSMUSG Nlgn2     | 6.254429 | 6.351905 | 9.118267 | 5.939864 | 7.019833 | 6.983582  |
| Mus_musc Mus_musc | 0.826982 | 0.743848 | 0.621844 | 0.712542 | 0.584672 | 0.645751  |
| ENSMUSG Muc15     | 0        | 0.024084 | 0.044561 | 0.012157 | 0        | 0         |
| ENSMUSG Mpped2    | 0.754635 | 0.636201 | 0.77961  | 0.516122 | 0.652571 | 0.624991  |
| ENSMUSG Pls3      | 93.10173 | 94.69614 | 85.26299 | 62.62192 | 60.56049 | 66.337564 |
| ENSMUSG Lin52     | 9.013065 | 10.51026 | 9.683174 | 6.657327 | 7.147406 | 5.98848   |
| ENSMUSG Zfp703    | 21.03279 | 19.10112 | 18.81618 | 16.52484 | 16.69513 | 17.360874 |
| ENSMUSG Krtap4-1  | 0        | 0        | 0        | 0        | 0        | 0         |
| Mus_musc Mus_musc | 0        | 0        | 0        | 0        | 0        | 0.331867  |
| ENSMUSG Gm11007   | 5.024628 | 4.248559 | 4.241936 | 2.294643 | 3.20294  | 4.60497   |
| ENSMUSG Gm21897   | 0        | 0        | 0        | 0        | 0        | 0         |
| Mus_musc Mus_musc | 0        | 0.324311 | 0        | 0        | 0        | 0         |
| ENSMUSG Scoc      | 17.45401 | 18.85979 | 17.62772 | 12.8593  | 14.47817 | 14.125507 |
| Mus_musc Mus_musc | 1.084109 | 3.815323 | 0.809572 | 2.326223 | 1.184294 | 2.350504  |
| Mus_musc Mus_musc | 0.60531  | 0.393204 | 0.317655 | 0        | 0.324053 | 0         |
| Mus_musc Mus_musc | 1.693659 | 1.20417  | 1.564422 | 0.417567 | 0.767454 | 0.730165  |
| Mus_musc Mus_musc | 0        | 0.308619 | 0        | 0        | 0        | 0         |
| Mus_musc Mus_musc | 0        | 0.291557 | 0        | 0        | 0        | 0         |
| Mus_musc Mus_musc | 0        | 0        | 0        | 0        | 0.069803 | 0         |
| Mus_musc Mus_musc | 0.821856 | 0.942301 | 0.469125 | 0.564786 | 0.645218 | 0.708473  |
| Mus_musc Mus_musc | 0        | 0        | 0.337872 | 0        | 0        | 0         |
| Mus_musc Mus_musc | 0.93364  | 0.312195 | 0.599068 | 0.111135 | 0.266614 | 0         |
| ENSMUSG Gm20865   | 0        | 0        | 0        | 0        | 0        | 0         |
| ENSMUSG Pdzd4     | 0.852517 | 1.060307 | 0.753182 | 0.915207 | 1.211056 | 1.055615  |
| ENSMUSG Srpk3     | 0.900916 | 0.792502 | 0.595668 | 1.552969 | 0.972383 | 1.111998  |
| ENSMUSG Gm8232    | 0        | 0        | 0        | 0        | 0        | 0         |
| ENSMUSG Gm8206    | 0.109562 | 0.165551 | 0.128543 | 0.068385 | 0.118287 | 0.071757  |
| ENSMUSG Gm8108    | 0        | 0.022269 | 0        | 0.066199 | 0.031322 | 0         |
| ENSMUSG Gm6665    | 8.367399 | 8.571342 | 7.452835 | 5.43362  | 5.347506 | 6.126691  |
| ENSMUSG Nyap1     | 0.785152 | 0.371051 | 0.395714 | 0.275064 | 0.474974 | 0.644327  |
| ENSMUSG Gm28171   | 0        | 0        | 0        | 0        | 0        | 0         |
| ENSMUSG Slc38a11  | 0.142265 | 0.101656 | 0.052911 | 0.21389  | 0.294275 | 0.162217  |
| Mus_musc Mus_musc | 0.152128 | 0.141913 | 0.133734 | 0.327657 | 0        | 0.158074  |
| Mus_musc Mus_musc | 0        | 0        | 0.324877 | 0        | 0        | 0         |
| Mus_musc Mus_musc | 0        | 0        | 0        | 0.174016 | 0        | 0         |
| Mus_musc Mus_musc | 0        | 0        | 0        | 0        | 0        | 0         |
| Mus_musc Mus_musc | 0.567921 | 0.31612  | 0.150696 | 0.232498 | 0.187811 | 0.069734  |
| Mus_musc Mus_musc | 0.208655 | 0        | 0        | 0.798881 | 0.647892 | 0.41188   |
| Mus_musc Mus_musc | 0        | 0        | 0        | 0.145177 | 0        | 0.100244  |

|                    |          |          |          |          |          |           |
|--------------------|----------|----------|----------|----------|----------|-----------|
| ENSMUSG Olfr897-ps | 0        | 0        | 0        | 0        | 0        | 0         |
| Mus_musc Mus_musc  | 0.117032 | 0.234345 | 0        | 0        | 0        | 0.165844  |
| Mus_musc Mus_musc  | 0.693921 | 0.953889 | 0.983297 | 0.860912 | 0.688671 | 0.757772  |
| ENSMUSG Taar8b     | 0        | 0        | 0        | 0        | 0        | 0         |
| ENSMUSG Tdrd9      | 0.040938 | 0        | 0.006183 | 0.03463  | 0        | 0         |
| ENSMUSG Tusc1      | 2.506264 | 3.180186 | 2.437525 | 2.522854 | 2.827968 | 3.313476  |
| ENSMUSG Mill1      | 0        | 0        | 0        | 0        | 0        | 0         |
| ENSMUSG Ndst1      | 66.5024  | 65.41874 | 59.12068 | 51.67807 | 47.635   | 50.425236 |
| ENSMUSG Gm13695    | 0        | 0        | 0        | 0        | 0        | 0         |
| ENSMUSG Vmn1r215   | 0        | 0        | 0        | 0        | 0        | 0         |
| ENSMUSG Psemb9     | 28.80992 | 26.98396 | 88.70608 | 61.83975 | 31.98224 | 43.259582 |
| ENSMUSG Gm28551    | 0.112631 | 0.14501  | 0.221095 | 0.101982 | 0.080036 | 0.072832  |
| ENSMUSG Il22ra1    | 0.548047 | 0.764999 | 0.192018 | 0.896363 | 0.834629 | 0.679263  |
| ENSMUSG Zfp276     | 7.638804 | 7.244537 | 7.729234 | 7.054002 | 7.799859 | 7.444773  |
| ENSMUSG Ndufc1     | 6.187875 | 6.671868 | 6.266057 | 7.521358 | 7.257958 | 7.839903  |
| ENSMUSG Vps9d1     | 6.996361 | 7.437384 | 7.857044 | 6.966448 | 6.96615  | 6.353168  |
| ENSMUSG Lrrc20     | 4.108452 | 4.39899  | 4.533803 | 5.142589 | 4.626876 | 5.525415  |
| ENSMUSG Tmem129    | 9.826093 | 10.6557  | 10.2849  | 8.880367 | 10.4179  | 10.972926 |
| ENSMUSG Peg10      | 0.598248 | 0.85039  | 0.805101 | 0.596163 | 0.536079 | 0.537715  |
| ENSMUSG Gm2244     | 0        | 0        | 0        | 0        | 0.009297 | 0         |
| ENSMUSG Vmn2r59    | 0        | 0        | 0        | 0        | 0        | 0         |
| ENSMUSG Wee2       | 0        | 0        | 0        | 0        | 0        | 0         |
| ENSMUSG Kyat1      | 6.080074 | 6.408741 | 5.076202 | 5.77333  | 4.441296 | 5.637417  |
| ENSMUSG Mrpl12     | 20.73282 | 22.33035 | 21.08369 | 21.89186 | 21.15901 | 24.903004 |
| ENSMUSG Vasn       | 19.32105 | 15.51007 | 19.18862 | 11.51834 | 11.09569 | 12.280386 |
| ENSMUSG Ssxb3      | 0        | 0        | 0        | 0        | 0        | 0         |
| ENSMUSG Fpr3       | 0        | 0        | 0.041542 | 0        | 0        | 0         |
| ENSMUSG Ssxb8      | 0        | 0        | 0        | 0        | 0        | 0         |
| ENSMUSG Ssxb6      | 0        | 0        | 0        | 0        | 0        | 0         |
| ENSMUSG Ssxb1      | 0        | 0        | 0        | 0        | 0        | 0         |
| ENSMUSG Gm14459    | 0        | 0        | 0        | 0        | 0        | 0         |
| ENSMUSG Tcte3      | 0.379795 | 0.285768 | 0.263929 | 0.120947 | 0.395564 | 0.370721  |
| ENSMUSG Cd209b     | 0.952848 | 1.190918 | 0.486924 | 1.230221 | 2.103891 | 1.523679  |
| ENSMUSG Mrpl32     | 5.226778 | 5.613149 | 6.272079 | 5.263026 | 5.27998  | 5.427757  |
| ENSMUSG Pma2       | 24.55451 | 23.63241 | 28.16249 | 26.60247 | 24.50509 | 25.510365 |
| ENSMUSG Acot3      | 0        | 0        | 0        | 0        | 0        | 0         |
| ENSMUSG Acot2      | 5.542637 | 4.41595  | 5.094514 | 3.464459 | 4.441368 | 4.492214  |
| ENSMUSG Numb       | 43.74292 | 43.45411 | 47.14306 | 27.54099 | 30.19405 | 27.833656 |
| ENSMUSG Papln      | 0.539886 | 0.538971 | 0.353132 | 0.490572 | 0.17017  | 0.611315  |
| ENSMUSG Dcaf4      | 2.997209 | 2.514053 | 2.670055 | 2.255007 | 2.368558 | 3.367631  |
| ENSMUSG Dpf3       | 0.57345  | 0.372622 | 0.49552  | 0.27624  | 0.705482 | 0.560007  |
| ENSMUSG Gm3127     | 0        | 0        | 0        | 0        | 0        | 0         |
| ENSMUSG Vmn2r56    | 0        | 0        | 0        | 0        | 0        | 0         |
| ENSMUSG Nxf7       | 0        | 0.10262  | 0.019443 | 0.085566 | 0        | 0         |
| ENSMUSG Rtca       | 15.08654 | 15.06997 | 14.42344 | 14.98688 | 13.75034 | 14.658147 |
| ENSMUSG Krtap26-1  | 0        | 0        | 0        | 0        | 0        | 0         |
| ENSMUSG Mrpl33     | 33.1619  | 26.63594 | 34.19807 | 35.39481 | 31.23984 | 30.502086 |
| ENSMUSG Obp2a      | 0        | 0        | 0        | 0        | 0        | 0         |
| ENSMUSG Slc2a7     | 0        | 0        | 0        | 0        | 0        | 0         |
| ENSMUSG Gm5072     | 0        | 0        | 0        | 0        | 0        | 0         |
| ENSMUSG Btbd35f27  | 0        | 0        | 0        | 0        | 0        | 0         |
| ENSMUSG Gm17521    | 0        | 0        | 0        | 0        | 0        | 0         |
| ENSMUSG Gm21900    | 0        | 0        | 0        | 0        | 0        | 0         |
| ENSMUSG Gm21679    | 0        | 0        | 0        | 0        | 0        | 0         |
| ENSMUSG Rab31      | 22.20566 | 19.99748 | 18.04706 | 21.04664 | 19.71415 | 21.356364 |
| ENSMUSG Nppb       | 0        | 0.102346 | 0        | 0        | 0.124302 | 0         |
| ENSMUSG Dpysl2     | 17.9898  | 19.47502 | 20.87706 | 9.797398 | 10.87261 | 9.056116  |
| ENSMUSG Trim35     | 45.70823 | 40.00143 | 38.93163 | 32.28408 | 35.63189 | 33.235106 |
| ENSMUSG Orc5       | 7.087211 | 8.0769   | 8.042743 | 7.405354 | 6.069396 | 6.844611  |
| ENSMUSG Chrna2     | 0        | 0        | 0        | 0.027077 | 0        | 0         |
| ENSMUSG Dnajc2     | 10.70655 | 9.564843 | 9.466486 | 11.73584 | 10.843   | 11.581826 |
| ENSMUSG Slc26a5    | 0        | 0        | 0        | 0.035132 | 0        | 0         |
| ENSMUSG Clcn6      | 5.869193 | 5.725902 | 6.076959 | 4.149948 | 4.711018 | 4.92737   |
| ENSMUSG Pmpcb      | 21.12786 | 22.09544 | 22.96307 | 21.42874 | 21.26813 | 22.197564 |

|                   |          |          |          |          |          |           |
|-------------------|----------|----------|----------|----------|----------|-----------|
| Mus_musc Mus_musc | 0.724532 | 0.113628 | 0.842048 | 0.25447  | 0.435211 | 0.224612  |
| Mus_musc Mus_musc | 0        | 0        | 0        | 0        | 0.186692 | 0         |
| Mus_musc Mus_musc | 0        | 0.053954 | 0        | 0.12169  | 0.319858 | 0.325653  |
| Mus_musc Mus_musc | 0        | 0        | 0        | 0.351413 | 0.132766 | 0.045891  |
| ENSMUSG Asic3     | 0.053477 | 0.048383 | 0.08187  | 0.06076  | 0.09853  | 0.099896  |
| ENSMUSG Fau       | 463.356  | 480.1238 | 521.4982 | 551.4989 | 483.258  | 541.51669 |
| ENSMUSG Manba     | 7.318293 | 7.089041 | 7.554946 | 8.576065 | 9.103206 | 10.39903  |
| ENSMUSG Iffo1     | 5.078081 | 3.652204 | 5.60204  | 4.568574 | 3.992483 | 4.1938    |
| ENSMUSG Nbas      | 5.687067 | 5.109964 | 5.005154 | 5.289475 | 5.751397 | 5.951553  |
| ENSMUSG Tspan13   | 174.3927 | 168.2232 | 172.516  | 119.0565 | 123.5725 | 104.86573 |
| ENSMUSG Sypl      | 51.19771 | 44.82005 | 43.14219 | 42.10612 | 36.01396 | 42.550348 |
| ENSMUSG Pdia6     | 85.7231  | 95.23952 | 111.6637 | 153.3001 | 161.826  | 165.37503 |
| ENSMUSG Nampt     | 22.02453 | 24.00402 | 27.21532 | 21.33732 | 20.5954  | 19.947672 |
| ENSMUSG Nop2      | 7.425037 | 7.137858 | 6.981723 | 7.458012 | 6.871996 | 8.762975  |
| ENSMUSG Eif4g3    | 19.7683  | 17.95948 | 18.43313 | 19.64716 | 18.76899 | 21.460421 |
| ENSMUSG Hspg2     | 20.67679 | 15.36392 | 17.90017 | 14.33665 | 15.69795 | 16.272185 |
| ENSMUSG Alpl      | 13.14358 | 11.34607 | 15.10522 | 9.475562 | 10.86252 | 11.350194 |
| ENSMUSG PscA      | 0        | 0.053829 | 0.033591 | 0.403475 | 0        | 0.218025  |
| Mus_musc Mus_musc | 0        | 0        | 0        | 0        | 0.312337 | 0         |
| ENSMUSG Lynx1     | 5.637634 | 6.87127  | 5.168068 | 6.363877 | 5.107983 | 6.355364  |
| ENSMUSG Lypd2     | 10.00562 | 23.19617 | 7.88237  | 39.34046 | 33.23524 | 39.776329 |
| ENSMUSG Slurp1    | 0.802254 | 1.564349 | 0.803115 | 0.666596 | 0.288883 | 0.973926  |
| Mus_musc Mus_musc | 0        | 0.453734 | 0        | 0        | 0        | 0         |
| Mus_musc Mus_musc | 0.156625 | 0.050879 | 0        | 0        | 0.466123 | 0         |
| Mus_musc Mus_musc | 1.030015 | 1.236886 | 1.050865 | 1.047164 | 0.859517 | 0.997497  |
| ENSMUSG Srrm4     | 0.030475 | 0.024455 | 0.073781 | 0.006684 | 0        | 0.010994  |
| ENSMUSG Gm12258   | 1.97709  | 2.118172 | 2.019129 | 2.60575  | 2.138267 | 2.581777  |
| ENSMUSG Noxred1   | 0.439122 | 0.32002  | 0.172469 | 0.71343  | 0.318627 | 0.258048  |
| ENSMUSG Gas2l2    | 0.870348 | 1.109371 | 0.515741 | 1.344325 | 1.13564  | 0.974705  |
| ENSMUSG Cdc27     | 9.085218 | 9.174958 | 8.179717 | 8.630927 | 8.993437 | 8.841072  |
| ENSMUSG Rasl10b   | 1.100692 | 1.356597 | 1.840082 | 0.964582 | 0.800035 | 1.12071   |
| ENSMUSG Mmp28     | 17.27697 | 16.11425 | 15.2793  | 8.952911 | 10.94876 | 9.708375  |
| ENSMUSG Gsto1     | 36.07179 | 44.27538 | 31.14604 | 80.271   | 74.04466 | 81.252556 |
| ENSMUSG Taf15     | 23.97592 | 22.9041  | 28.43186 | 23.71454 | 22.47428 | 23.482824 |
| ENSMUSG Ace       | 463.9804 | 425.7879 | 503.5069 | 254.7606 | 289.9352 | 271.84213 |
| ENSMUSG Col17a1   | 0.52502  | 0.471411 | 0.480947 | 0.342172 | 0.300652 | 0.256635  |
| ENSMUSG Sfr1      | 42.22487 | 39.77207 | 40.99058 | 34.81828 | 36.87461 | 33.492664 |
| ENSMUSG Sik       | 30.26556 | 30.69842 | 28.93627 | 24.01212 | 26.18817 | 22.651726 |
| ENSMUSG Itgb3     | 3.89042  | 3.975491 | 3.871351 | 4.778103 | 4.449565 | 4.723882  |
| Mus_musc Mus_musc | 0.294253 | 0.078237 | 0.163448 | 0.157578 | 0        | 0.112195  |
| Mus_musc Mus_musc | 1.201649 | 1.014967 | 0.611527 | 0.473647 | 0.607962 | 0.167109  |
| Mus_musc Mus_musc | 0        | 0        | 0        | 0.386999 | 0        | 0         |
| ENSMUSG 1110032A  | 8.021737 | 8.522999 | 7.939132 | 9.540306 | 8.803125 | 9.031257  |
| ENSMUSG Snn       | 28.32055 | 23.00749 | 24.14662 | 28.16531 | 25.93689 | 24.00458  |
| ENSMUSG Itprid1   | 2.801729 | 2.79393  | 1.580299 | 3.445657 | 3.190638 | 2.950532  |
| ENSMUSG Muc5ac    | 0.070914 | 0.149152 | 0.016529 | 9.383208 | 8.47668  | 10.851994 |
| ENSMUSG 6430571L1 | 0.148964 | 0.043758 | 0.118561 | 0.174083 | 0.092089 | 0.112964  |
| ENSMUSG Ccdc92    | 12.018   | 10.83628 | 9.97279  | 7.476226 | 7.30297  | 7.509566  |
| Mus_musc Mus_musc | 0.631358 | 0.426883 | 0.315693 | 0.612568 | 0.972638 | 0.765589  |
| ENSMUSG Fam117a   | 16.91617 | 17.17551 | 16.45527 | 15.58288 | 14.12198 | 16.088156 |
| ENSMUSG Prl3b1    | 0        | 0        | 0        | 0        | 0        | 0         |
| ENSMUSG Irs2      | 11.65423 | 7.901156 | 6.959566 | 6.176899 | 7.286405 | 6.336438  |
| ENSMUSG Zfp653    | 5.964967 | 5.412359 | 5.540845 | 5.443039 | 4.677255 | 4.908405  |
| Mus_musc Mus_musc | 0        | 0        | 0.168936 | 0        | 0        | 0         |
| Mus_musc Mus_musc | 0.91933  | 1.093575 | 0.759526 | 0.595983 | 0.599078 | 0.618002  |
| ENSMUSG Loxl1     | 13.12627 | 11.39083 | 12.96046 | 18.32123 | 15.96684 | 22.102377 |
| ENSMUSG Nptn      | 76.17273 | 83.61492 | 99.98987 | 70.13647 | 72.04645 | 78.875111 |
| ENSMUSG Cox7a2    | 48.16148 | 54.46883 | 55.30541 | 54.68462 | 55.45131 | 56.938564 |
| ENSMUSG Stoml1    | 8.133796 | 8.09408  | 7.968064 | 7.977556 | 7.372957 | 8.465173  |
| ENSMUSG Col12a1   | 4.711406 | 3.826897 | 4.179485 | 1.375931 | 1.515514 | 1.622874  |
| ENSMUSG Thbs2     | 0.694552 | 0.551639 | 0.765787 | 1.027684 | 0.7722   | 0.888249  |
| ENSMUSG Smoc2     | 5.20009  | 6.661803 | 4.584717 | 4.206093 | 3.867441 | 4.292489  |
| ENSMUSG Hcn4      | 0.1888   | 0.149214 | 0.066271 | 0.1807   | 0.110069 | 0.125842  |
| ENSMUSG Phf10     | 17.17899 | 19.84629 | 18.76234 | 16.99187 | 18.07245 | 17.087859 |

|                   |          |          |          |          |          |           |
|-------------------|----------|----------|----------|----------|----------|-----------|
| ENSMUSG Zfp54     | 1.563706 | 1.959103 | 1.663767 | 2.051146 | 1.777099 | 1.721336  |
| ENSMUSG Zfp213    | 2.813051 | 3.432606 | 2.895595 | 2.784906 | 2.557532 | 2.987232  |
| ENSMUSG Slc25a16  | 10.49224 | 9.725426 | 8.922009 | 9.245486 | 9.161697 | 8.846738  |
| ENSMUSG 2210408I2 | 1.253782 | 1.30656  | 0.90168  | 1.006673 | 1.091516 | 1.085448  |
| ENSMUSG Prm3      | 0        | 0        | 0        | 0        | 0        | 0         |
| ENSMUSG Dusp13    | 0.16605  | 0.148003 | 0.159461 | 0.539761 | 0.170323 | 0.388164  |
| ENSMUSG Zfp937    | 1.324601 | 1.111943 | 0.997191 | 0.855738 | 1.119865 | 0.907806  |
| ENSMUSG BC067074  | 1.964217 | 1.928038 | 1.380257 | 1.029333 | 1.09824  | 1.043575  |
| ENSMUSG Gpx8      | 27.88664 | 24.59012 | 26.24292 | 22.98591 | 20.524   | 22.346428 |
| ENSMUSG Olfr384   | 0        | 0        | 0        | 0        | 0        | 0         |
| ENSMUSG Tmc2      | 0        | 0        | 0        | 0        | 0        | 0         |
| ENSMUSG Kat6b     | 5.610804 | 5.817303 | 5.023535 | 5.101083 | 4.876976 | 5.342199  |
| ENSMUSG Ndufs4    | 12.73498 | 12.91694 | 14.75117 | 16.42    | 12.67939 | 13.140854 |
| ENSMUSG Fst       | 2.013377 | 2.489841 | 2.488412 | 6.74643  | 9.166897 | 10.818756 |
| ENSMUSG Gm15023   | 0.005085 | 0.004173 | 0        | 0.016929 | 0.018703 | 0.140356  |
| ENSMUSG Cfap300   | 2.22874  | 2.473843 | 1.564941 | 2.475904 | 3.255507 | 3.207005  |
| ENSMUSG BB014433  | 0        | 0        | 0        | 0        | 0        | 0         |
| ENSMUSG Senp3     | 25.81805 | 24.84818 | 25.30915 | 22.61706 | 20.82906 | 22.707022 |
| ENSMUSG Ndnf      | 14.435   | 11.81356 | 14.82059 | 9.166444 | 8.254321 | 10.430264 |
| ENSMUSG Shbg      | 0        | 0        | 0        | 0        | 0        | 0         |
| ENSMUSG 4930595M  | 0        | 0        | 0        | 0        | 0        | 0         |
| ENSMUSG Cyp2c38   | 0        | 0        | 0        | 0        | 0        | 0         |
| ENSMUSG Cdv3      | 21.36751 | 22.30598 | 22.54273 | 24.43715 | 23.69766 | 24.361308 |
| ENSMUSG Srxn1     | 7.847638 | 6.942544 | 7.482033 | 9.476763 | 9.100189 | 10.765495 |
| ENSMUSG Alox12b   | 0.023204 | 0        | 0        | 0        | 0.046078 | 0.018563  |
| ENSMUSG Slc10a3   | 7.062145 | 7.003909 | 6.40732  | 7.523046 | 8.752685 | 7.692952  |
| ENSMUSG Rmdn2     | 16.54553 | 18.69124 | 17.26259 | 13.21644 | 13.73558 | 13.076775 |
| ENSMUSG P2ry13    | 1.744349 | 1.8663   | 1.965487 | 1.235597 | 1.507201 | 1.240707  |
| ENSMUSG D16Ertd47 | 6.986651 | 5.664192 | 7.01243  | 6.270163 | 5.329173 | 5.292701  |
| ENSMUSG Cxadr     | 27.223   | 27.51035 | 20.58206 | 20.57964 | 18.43321 | 21.99183  |
| ENSMUSG Usp25     | 23.28641 | 23.45638 | 24.75552 | 19.98219 | 18.86786 | 18.419474 |
| ENSMUSG Chodl     | 0        | 0.121926 | 0        | 0.047365 | 0.05899  | 0.170817  |
| ENSMUSG Dgkg      | 0.680771 | 0.734077 | 0.93285  | 1.614872 | 1.06748  | 1.179379  |
| ENSMUSG Btg3      | 48.06346 | 46.65135 | 48.09803 | 35.40856 | 36.71488 | 36.762483 |
| ENSMUSG Ahsg      | 0.226043 | 0.025372 | 0        | 0.27275  | 0.485727 | 0.570059  |
| ENSMUSG Dmpk      | 12.55549 | 13.4343  | 13.37446 | 12.09762 | 12.70027 | 12.544161 |
| ENSMUSG Qpctl     | 4.77145  | 4.456803 | 4.892638 | 5.997923 | 6.150002 | 6.254493  |
| ENSMUSG Gipr      | 0        | 0        | 0.01532  | 0.025469 | 0        | 0         |
| ENSMUSG Rtn2      | 9.25276  | 10.52069 | 9.58328  | 9.791165 | 8.872406 | 10.789054 |
| ENSMUSG Ercc2     | 8.250471 | 7.268181 | 7.928632 | 7.354383 | 7.439472 | 6.894377  |
| ENSMUSG Vasp      | 50.40902 | 50.83975 | 59.93023 | 59.82385 | 53.92676 | 57.822227 |
| ENSMUSG Ppm1n     | 0.097781 | 0        | 0.038544 | 0.049206 | 0.032512 | 0.141283  |
| ENSMUSG Rnf186    | 28.90836 | 20.70227 | 20.1874  | 14.41729 | 12.38119 | 13.527734 |
| ENSMUSG Etv1      | 2.447045 | 2.213908 | 2.088517 | 1.690712 | 1.767781 | 1.427088  |
| ENSMUSG Smox      | 10.89178 | 13.01419 | 12.80641 | 10.4786  | 10.72488 | 11.296656 |
| ENSMUSG lvd       | 21.71113 | 22.34709 | 20.63126 | 15.64737 | 18.14431 | 16.806547 |
| ENSMUSG Knstrn    | 1.127295 | 0.851418 | 0.579656 | 1.406633 | 1.992116 | 2.305412  |
| ENSMUSG Cdc25b    | 8.806522 | 8.456127 | 8.205351 | 7.513508 | 8.745693 | 8.632814  |
| ENSMUSG Olfr1496  | 0        | 0        | 0        | 0        | 0        | 0         |
| ENSMUSG Adra1d    | 1.207104 | 1.017352 | 1.255323 | 0.641266 | 0.571776 | 0.344319  |
| ENSMUSG Arxes1    | 5.442776 | 7.878116 | 5.705572 | 4.943508 | 2.511264 | 2.033316  |
| ENSMUSG Rassf2    | 9.265703 | 10.9635  | 9.733331 | 11.60823 | 11.62326 | 12.233373 |
| ENSMUSG Prnd      | 0.46925  | 0.044375 | 0.182292 | 0.645429 | 1.326361 | 1.092114  |
| ENSMUSG Gm17660   | 0        | 0        | 0        | 0        | 0        | 0         |
| Mus_musc Mus_musc | 0.257941 | 0.159912 | 0.154103 | 0.094927 | 0.267257 | 0.182854  |
| ENSMUSG Gm11639   | 0        | 0        | 0        | 0        | 0        | 0.013511  |
| ENSMUSG Gpr161    | 0.619419 | 0.457936 | 0.464515 | 0.591837 | 0.529143 | 0.455366  |
| ENSMUSG Pcdhb15   | 0.440575 | 0.518239 | 0.347945 | 0.56417  | 0.535682 | 0.456158  |
| ENSMUSG Vmn1r68   | 0        | 0        | 0        | 0        | 0        | 0         |
| ENSMUSG Trip13    | 0.338003 | 0.433226 | 0.401896 | 0.384331 | 0.743609 | 0.64732   |
| ENSMUSG Olfr331   | 0        | 0        | 0        | 0        | 0        | 0         |
| ENSMUSG Col13a1   | 12.18622 | 13.03763 | 15.15843 | 11.97601 | 10.87337 | 9.528475  |
| ENSMUSG Olfr97    | 0        | 0        | 0        | 0        | 0        | 0         |
| ENSMUSG Cog4      | 16.87012 | 19.20667 | 17.42306 | 15.46718 | 17.8177  | 17.907678 |

|                   |          |          |          |          |          |           |
|-------------------|----------|----------|----------|----------|----------|-----------|
| ENSMUSG Ii34      | 11.5296  | 10.95611 | 12.92537 | 7.90684  | 9.214939 | 9.71395   |
| ENSMUSG Amfr      | 52.09102 | 48.66446 | 49.21162 | 42.30955 | 44.31849 | 45.647383 |
| ENSMUSG Cenpn     | 0.691824 | 0.678822 | 0.893604 | 0.838486 | 1.344258 | 1.263624  |
| ENSMUSG Mt4       | 0        | 0        | 0        | 0        | 0        | 0         |
| ENSMUSG Nudt21    | 9.334082 | 10.36131 | 9.865905 | 10.21028 | 8.886413 | 9.66918   |
| ENSMUSG Bbs2      | 5.602926 | 5.928358 | 4.411445 | 4.203819 | 3.985857 | 4.059311  |
| ENSMUSG Cdy12     | 2.190789 | 3.072873 | 2.78601  | 2.712443 | 2.760972 | 2.977155  |
| ENSMUSG Npff      | 0.873545 | 0.717655 | 1.771936 | 0        | 0.291671 | 0.50548   |
| ENSMUSG Pcnp      | 51.83242 | 53.29537 | 50.37743 | 42.73508 | 38.83981 | 38.265303 |
| ENSMUSG Map3k12   | 3.731259 | 3.974599 | 3.724233 | 3.827018 | 3.851321 | 3.816757  |
| ENSMUSG Gprin2    | 0.010569 | 0.046633 | 0.023185 | 0.049899 | 0.047169 | 0.050965  |
| ENSMUSG Fabp2     | 0        | 0.08459  | 0        | 0        | 0        | 0.156129  |
| ENSMUSG Calcoco1  | 57.63506 | 56.46071 | 50.82168 | 40       | 41.59362 | 37.81229  |
| ENSMUSG Nbeal1    | 9.451877 | 10.02737 | 9.054657 | 6.500981 | 6.437298 | 6.27716   |
| ENSMUSG Dmap1     | 10.88343 | 8.891111 | 11.38167 | 8.448673 | 7.36183  | 9.416845  |
| ENSMUSG Mcu       | 7.427327 | 7.302792 | 5.97897  | 6.217215 | 5.628741 | 6.620906  |
| ENSMUSG Pla2g12b  | 0.155113 | 0.056575 | 0.221738 | 0.054709 | 0.15127  | 0.161733  |
| ENSMUSG Olfr1426  | 0        | 0        | 0        | 0        | 0        | 0         |
| Mus_musc Mus_musc | 1.839232 | 1.814106 | 2.507306 | 2.260504 | 1.102374 | 1.719847  |
| Mus_musc Mus_musc | 0        | 0        | 0        | 0        | 0.053611 | 0.184198  |
| Mus_musc Mus_musc | 0        | 0        | 0        | 0.223575 | 0        | 0         |
| Mus_musc Mus_musc | 0.047958 | 0.340571 | 0        | 0.109859 | 0        | 0.493035  |
| Mus_musc Mus_musc | 0.188478 | 0        | 0        | 0        | 0        | 0         |
| Mus_musc Mus_musc | 0        | 0        | 0        | 0.285762 | 0        | 0.151683  |
| Mus_musc Mus_musc | 0        | 0        | 0.058522 | 0.372419 | 0        | 0.191827  |
| Mus_musc Mus_musc | 1.241338 | 1.179873 | 1.04456  | 1.202257 | 0.719569 | 0.832076  |
| ENSMUSG Ankle1    | 0        | 0.074554 | 0.130103 | 0.283184 | 0.401977 | 0.515833  |
| Mus_musc Mus_musc | 0.752258 | 0.846911 | 0.853498 | 0.930852 | 1.102596 | 0.58745   |
| Mus_musc Mus_musc | 0        | 0        | 0        | 0.307588 | 0        | 0         |
| Mus_musc Mus_musc | 0        | 0        | 0.098483 | 0        | 0        | 0.235808  |
| Mus_musc Mus_musc | 3.062247 | 3.606497 | 2.932928 | 2.68466  | 2.674471 | 2.44255   |
| Mus_musc Mus_musc | 10.30882 | 9.332687 | 13.07284 | 8.960376 | 8.57408  | 7.169392  |
| Mus_musc Mus_musc | 0        | 0.148409 | 0        | 0        | 0.241053 | 0         |
| Mus_musc Mus_musc | 0.055993 | 0.169523 | 0.302521 | 0        | 0        | 0         |
| Mus_musc Mus_musc | 0.319216 | 0.122012 | 0        | 0        | 0        | 0.22188   |
| Mus_musc Mus_musc | 0.407573 | 0.430718 | 0.080501 | 0.64392  | 1.10722  | 1.089156  |
| Mus_musc Mus_musc | 0.286586 | 0        | 0        | 0        | 0        | 0         |
| Mus_musc Mus_musc | 9.245502 | 9.22354  | 8.25183  | 7.34056  | 7.479037 | 7.362681  |
| ENSMUSG Scyl2     | 8.725323 | 9.011124 | 8.602276 | 8.660401 | 9.365605 | 8.495912  |
| ENSMUSG Gm20715   | 0        | 0        | 0        | 0        | 0        | 0         |
| ENSMUSG Htr3b     | 0        | 0        | 0        | 0        | 0        | 0         |
| ENSMUSG Hscb      | 13.42477 | 11.31224 | 13.54815 | 16.08989 | 14.20629 | 13.321286 |
| ENSMUSG Fat4      | 2.600598 | 3.402783 | 2.370942 | 2.345205 | 2.783082 | 2.427419  |
| ENSMUSG Rai2      | 3.095493 | 2.878806 | 2.256651 | 2.645833 | 3.40219  | 3.21539   |
| ENSMUSG Olfr700   | 0        | 0        | 0        | 0        | 0        | 0         |
| ENSMUSG Tmem45a2  | 0.075261 | 0.022697 | 0        | 0.040885 | 0.017679 | 0.062215  |
| Mus_musc Mus_musc | 0.136675 | 0.113976 | 0        | 0        | 0        | 0         |
| ENSMUSG Gcfc2     | 1.258674 | 1.038397 | 1.166815 | 1.034589 | 1.06875  | 1.114161  |
| Mus_musc Mus_musc | 0.167289 | 0        | 0        | 0.30964  | 0        | 0.096731  |
| Mus_musc Mus_musc | 0.604527 | 0.823672 | 0.764989 | 0.653208 | 0.560563 | 0.719446  |
| ENSMUSG Wdr78     | 2.904741 | 4.296312 | 2.448971 | 4.035021 | 4.560689 | 4.192638  |
| ENSMUSG Neil2     | 0.396112 | 0.448302 | 0.467897 | 0.38343  | 0.455715 | 0.65552   |
| ENSMUSG Urad      | 0        | 0        | 0        | 0        | 0        | 0         |
| ENSMUSG Nudcd1    | 3.521489 | 3.493693 | 3.490257 | 3.934669 | 3.710385 | 3.712533  |
| ENSMUSG Gm9837    | 0        | 0        | 0        | 0        | 0.079172 | 0         |
| ENSMUSG Casc3     | 17.82212 | 17.25057 | 18.11942 | 15.71331 | 14.37297 | 15.676484 |
| ENSMUSG Gm10974   | 0        | 0        | 0        | 0        | 0        | 0         |
| ENSMUSG Mup18     | 0        | 0        | 0        | 0        | 0        | 0         |
| ENSMUSG Mup16     | 0        | 0        | 0        | 0        | 0        | 0         |
| ENSMUSG Mup20     | 0.101715 | 0        | 0        | 0        | 0        | 0         |
| ENSMUSG Mup19     | 0        | 0        | 0        | 0        | 0        | 0         |
| ENSMUSG Fam174b   | 54.40167 | 47.46643 | 50.11378 | 32.83022 | 33.98696 | 36.15683  |
| ENSMUSG Nmrk2     | 0        | 0.190265 | 0.054672 | 0.122675 | 0        | 0         |
| ENSMUSG Map2k1    | 31.35317 | 29.41905 | 30.71635 | 30.01203 | 28.55007 | 30.90847  |

|                   |          |          |          |          |          |           |
|-------------------|----------|----------|----------|----------|----------|-----------|
| ENSMUSG Sgta      | 34.18375 | 33.3129  | 34.91204 | 28.60369 | 32.87963 | 33.836166 |
| ENSMUSG Pias4     | 10.82908 | 8.540606 | 11.04313 | 9.424239 | 10.91264 | 9.687835  |
| ENSMUSG Matk      | 0.946966 | 0.374224 | 0.750079 | 8.956588 | 6.971953 | 8.405045  |
| ENSMUSG Apba3     | 16.8766  | 17.7499  | 17.13823 | 15.47512 | 15.93387 | 16.941818 |
| ENSMUSG Asxl3     | 0.009388 | 0.058652 | 0.008117 | 0.017838 | 0.026048 | 0.042358  |
| ENSMUSG Hs6st1    | 13.00286 | 13.25168 | 12.76383 | 14.60374 | 14.11237 | 16.58429  |
| ENSMUSG Vcpip1    | 7.78584  | 7.236952 | 6.849148 | 6.502124 | 6.711953 | 6.878107  |
| ENSMUSG Nudt18    | 6.449547 | 7.057983 | 7.050098 | 7.201478 | 6.228296 | 5.879557  |
| ENSMUSG Cldn18    | 233.9617 | 221.8205 | 190.6365 | 131.1126 | 141.4836 | 141.89494 |
| ENSMUSG Mras      | 5.607974 | 5.683698 | 5.705984 | 4.51646  | 4.408808 | 5.430351  |
| ENSMUSG Cdc25a    | 3.638485 | 3.383424 | 3.475991 | 4.401898 | 4.373252 | 4.163982  |
| ENSMUSG Nck1      | 23.13161 | 22.17822 | 24.55134 | 19.71514 | 20.07763 | 24.525275 |
| ENSMUSG Nme6      | 3.842917 | 5.487256 | 4.39938  | 4.326953 | 5.701983 | 6.058101  |
| ENSMUSG Map4      | 65.99663 | 61.73658 | 62.73612 | 46.54317 | 49.0622  | 46.554839 |
| ENSMUSG Bhlhe40   | 23.8948  | 22.94954 | 23.82245 | 30.32128 | 28.84713 | 34.013275 |
| ENSMUSG Gabrg1    | 0        | 0        | 0        | 0        | 0        | 0         |
| ENSMUSG Mfsd2b    | 1.388702 | 1.329564 | 1.054364 | 0.738983 | 0.678012 | 0.687385  |
| ENSMUSG Map4k1    | 3.711653 | 3.381709 | 3.692328 | 11.95093 | 9.672432 | 10.263848 |
| Mus_musc Mus_musc | 0.182193 | 0        | 0        | 0        | 0.317111 | 0.088162  |
| Mus_musc Mus_musc | 0.392599 | 0        | 0.391548 | 0        | 0        | 0.158844  |
| Mus_musc Mus_musc | 0.092195 | 0        | 0        | 0.68827  | 0.350331 | 0.635732  |
| ENSMUSG Usp18     | 10.14603 | 8.75021  | 11.84491 | 8.211957 | 7.928564 | 7.908601  |
| ENSMUSG Foxr1     | 0.028663 | 0        | 0        | 0.031652 | 0        | 0         |
| Mus_musc Mus_musc | 0.063122 | 0.246968 | 0.094253 | 0.415912 | 0.591413 | 0.146304  |
| ENSMUSG Med31     | 6.528222 | 9.132025 | 7.924139 | 6.690093 | 5.959522 | 5.946682  |
| Mus_musc Mus_musc | 0.469448 | 0.580625 | 0.500694 | 0.642618 | 0.75678  | 0.648417  |
| Mus_musc Mus_musc | 0.871012 | 0.821165 | 0.589309 | 0.548302 | 0.609211 | 0.681482  |
| ENSMUSG Nemp1     | 1.938302 | 2.160171 | 1.816247 | 2.009768 | 2.311771 | 1.936769  |
| ENSMUSG Cd209e    | 0.021913 | 0.106612 | 0        | 1.994619 | 4.337955 | 3.375964  |
| ENSMUSG Sycp1     | 0.587373 | 0.450985 | 0.495061 | 0.344235 | 0.421565 | 0.524478  |
| ENSMUSG Nras      | 22.44346 | 22.36358 | 22.8923  | 21.71096 | 21.7188  | 20.209011 |
| ENSMUSG Zfp935    | 0        | 0        | 0        | 0        | 0.01782  | 0         |
| ENSMUSG Lox       | 9.86241  | 10.08053 | 12.8909  | 13.90036 | 15.38498 | 12.658827 |
| ENSMUSG Zscan29   | 7.293314 | 7.943296 | 7.414181 | 7.735256 | 7.676092 | 7.731388  |
| ENSMUSG Txndc2    | 0.175301 | 0.076644 | 0.110262 | 0.101642 | 0.160766 | 0.104514  |
| ENSMUSG Olfr125   | 0        | 0        | 0        | 0        | 0        | 0         |
| ENSMUSG Pmaip1    | 7.25591  | 4.918418 | 6.599684 | 5.262509 | 5.49042  | 4.746172  |
| ENSMUSG Xpo6      | 13.61394 | 12.83143 | 13.25564 | 13.45531 | 13.86815 | 14.405395 |
| ENSMUSG Afg3l2    | 11.50949 | 12.55689 | 11.84681 | 12.82781 | 10.67381 | 11.704484 |
| ENSMUSG Cidea     | 0.738233 | 2.290599 | 0.440337 | 2.153674 | 1.769889 | 2.321949  |
| ENSMUSG Tfe3      | 12.28055 | 11.61457 | 13.56835 | 14.22284 | 14.50348 | 14.590222 |
| ENSMUSG Gnal      | 0.475443 | 0.586755 | 0.717096 | 0.625704 | 0.797766 | 0.776547  |
| ENSMUSG Nipal1    | 1.610651 | 1.466323 | 0.988272 | 1.675226 | 1.409248 | 1.590019  |
| ENSMUSG H2-T23    | 140.0705 | 119.8128 | 447.2921 | 223.1507 | 131.7899 | 167.68086 |
| ENSMUSG Usp51     | 0        | 0        | 0        | 0        | 0.014739 | 0.075212  |
| ENSMUSG Hmga2     | 0        | 0.030254 | 0        | 0.040558 | 0.075095 | 0         |
| ENSMUSG Cyp2j11   | 0        | 0        | 0        | 0        | 0        | 0         |
| ENSMUSG Gm10283   | 0        | 0        | 0        | 0        | 0        | 0         |
| ENSMUSG Dnah9     | 1.664142 | 1.813744 | 0.864405 | 2.3013   | 2.402551 | 2.202953  |
| ENSMUSG Grm7      | 0        | 0        | 0        | 0        | 0        | 0         |
| ENSMUSG Oasl1     | 1.194011 | 1.433732 | 2.467913 | 1.072932 | 1.245129 | 1.308558  |
| ENSMUSG Gm49387   | 0        | 0        | 0        | 0        | 0        | 0         |
| ENSMUSG Abca8a    | 20.11829 | 21.66741 | 19.48177 | 12.41683 | 11.48092 | 11.208001 |
| Mus_musc Mus_musc | 0.234951 | 0.40349  | 0.168302 | 0        | 0        | 0.206302  |
| Mus_musc Mus_musc | 0.722571 | 0        | 0        | 0        | 0        | 0         |
| Mus_musc Mus_musc | 0        | 0        | 0        | 0        | 0        | 0         |
| Mus_musc Mus_musc | 1.65517  | 2.095175 | 1.221688 | 2.562446 | 2.085935 | 2.761143  |
| Mus_musc Mus_musc | 0        | 0        | 0        | 0        | 0        | 0.189557  |
| Mus_musc Mus_musc | 0.188031 | 0        | 0        | 0        | 0.145728 | 0         |
| Mus_musc Mus_musc | 0.862921 | 1.078574 | 0.711659 | 1.666    | 1.104313 | 1.121564  |
| Mus_musc Mus_musc | 0        | 0.065522 | 0.180892 | 0        | 0.58248  | 0.161517  |
| ENSMUSG Gm15821   | 0.49742  | 0.24595  | 1.385975 | 0.916668 | 0.533954 | 0.530616  |
| Mus_musc Mus_musc | 0        | 0        | 0.196167 | 0.241193 | 0.400411 | 0.098712  |
| Mus_musc Mus_musc | 0.667567 | 0        | 0        | 0.101938 | 0        | 0         |

|                          |          |          |          |          |          |           |
|--------------------------|----------|----------|----------|----------|----------|-----------|
| Mus_musc Mus_musc        | 0        | 0.467123 | 0.096972 | 0        | 0        | 0         |
| ENSMUSG Olfr1362         | 0        | 0        | 0        | 0        | 0        | 0         |
| ENSMUSG Gm6563           | 30.30703 | 28.46695 | 32.21024 | 28.64278 | 34.75722 | 31.67304  |
| ENSMUSG Trap1a           | 0.153394 | 0        | 0        | 0        | 0        | 0         |
| ENSMUSG Jagn1            | 15.65694 | 12.89888 | 16.03009 | 13.97359 | 15.55199 | 14.17992  |
| ENSMUSG Nhlh1            | 0        | 0        | 0        | 0        | 0        | 0         |
| ENSMUSG Olfr1175- $\rho$ | 0        | 0        | 0        | 0        | 0        | 0         |
| Mus_musc Mus_musc        | 0        | 0.051436 | 0        | 0        | 0        | 0         |
| ENSMUSG Olfr1322         | 0        | 0        | 0        | 0        | 0        | 0         |
| Mus_musc Mus_musc        | 0.543202 | 0.748938 | 0.746185 | 0.865979 | 0.560775 | 0.684167  |
| Mus_musc Mus_musc        | 0.305423 | 0.192075 | 0.385933 | 0.348982 | 0.12936  | 0.520689  |
| Mus_musc Mus_musc        | 0        | 0        | 0        | 0        | 0        | 0         |
| Mus_musc Mus_musc        | 6.142173 | 7.285124 | 5.476305 | 4.761419 | 4.366511 | 4.283018  |
| Mus_musc Mus_musc        | 0.182446 | 0        | 0        | 0        | 0.267099 | 0.136772  |
| Mus_musc Mus_musc        | 0.074488 | 0.085581 | 0.145061 | 0.326047 | 0.072758 | 0         |
| ENSMUSG Homez            | 2.324521 | 1.962564 | 1.703782 | 2.654179 | 2.516502 | 2.517274  |
| ENSMUSG Tnr              | 0.011989 | 0.01295  | 0        | 0.025242 | 0.014658 | 0.045526  |
| ENSMUSG Olfr536          | 0        | 0        | 0        | 0        | 0        | 0         |
| ENSMUSG Epha3            | 0.996477 | 0.948445 | 0.95429  | 0.657654 | 0.802223 | 0.70627   |
| Mus_musc Mus_musc        | 0.664778 | 1.763998 | 0.984919 | 1.999354 | 1.345383 | 2.504775  |
| Mus_musc Mus_musc        | 0.231641 | 0        | 0        | 0.058704 | 0        | 0.109291  |
| Mus_musc Mus_musc        | 0        | 0        | 0        | 0.234305 | 0.079015 | 0         |
| Mus_musc Mus_musc        | 0        | 0        | 0.097073 | 0        | 0.096861 | 0         |
| Mus_musc Mus_musc        | 3.241577 | 3.395796 | 2.999839 | 2.170446 | 1.042416 | 1.710092  |
| Mus_musc Mus_musc        | 0        | 0.079009 | 0        | 0        | 0        | 0         |
| Mus_musc Mus_musc        | 0.211852 | 0.49537  | 0.288239 | 0.419327 | 0.120771 | 0.122625  |
| Mus_musc Mus_musc        | 0        | 0        | 0        | 0.242241 | 0        | 0         |
| Mus_musc Mus_musc        | 0        | 0        | 0        | 0.041432 | 0.328961 | 0.166379  |
| ENSMUSG Defb40           | 0        | 0        | 0        | 0        | 0        | 0         |
| ENSMUSG Rgs9bp           | 0.083031 | 0.026343 | 0.040478 | 0.123    | 0.081306 | 0.119176  |
| ENSMUSG Tgm5             | 0        | 0.053158 | 0.044307 | 0.048749 | 0.03358  | 0         |
| ENSMUSG Slc38a10         | 34.59412 | 34.01621 | 33.65436 | 37.18355 | 38.92186 | 40.415147 |
| ENSMUSG Lrrc75a          | 6.591146 | 6.906117 | 7.015222 | 4.980691 | 3.601732 | 3.941252  |
| ENSMUSG Gm42420          | 0        | 0        | 0        | 0        | 0        | 0         |
| ENSMUSG Olfr44           | 0        | 0        | 0        | 0        | 0        | 0         |
| ENSMUSG Ganc             | 4.106737 | 4.20136  | 3.903845 | 4.387064 | 4.093887 | 3.881648  |
| ENSMUSG Rpl7a            | 83.6815  | 88.49098 | 84.15562 | 83.13688 | 95.22086 | 137.08612 |
| ENSMUSG Ccdc38           | 0.020251 | 0.093303 | 0.07811  | 0.074459 | 0.121738 | 0.077809  |
| ENSMUSG Sostdc1          | 0        | 0.052938 | 0.028456 | 0.124381 | 0.079667 | 0.093076  |
| ENSMUSG Olfr679          | 0        | 0        | 0        | 0        | 0        | 0         |
| ENSMUSG Pphln1           | 25.72085 | 25.58548 | 22.74404 | 19.70583 | 20.3934  | 20.471417 |
| ENSMUSG Gm3542           | 0        | 0        | 0        | 0        | 0        | 0         |
| ENSMUSG Smg9             | 6.467953 | 6.581694 | 5.0044   | 6.940233 | 7.256726 | 7.026845  |
| ENSMUSG Ldhal6b          | 0.060118 | 0.147368 | 0.145554 | 0.157879 | 0.059948 | 0.01912   |
| ENSMUSG Gm17689          | 0        | 0        | 0        | 0        | 0        | 0         |
| ENSMUSG Vgll3            | 5.359469 | 5.325765 | 6.084722 | 4.186606 | 3.901609 | 3.755695  |
| ENSMUSG Cdc16            | 16.56037 | 16.32213 | 16.31259 | 16.35228 | 17.09539 | 17.172995 |
| ENSMUSG Fig4             | 12.77932 | 12.28374 | 12.07563 | 14.75504 | 15.50371 | 16.596731 |
| ENSMUSG Foxq1            | 1.291372 | 1.685326 | 0.874087 | 1.062458 | 0.875253 | 1.154711  |
| ENSMUSG Higd1a           | 9.898783 | 10.33611 | 10.94893 | 8.921522 | 8.832556 | 8.042607  |
| ENSMUSG Ddhd1            | 3.946905 | 4.896767 | 4.5137   | 5.964609 | 6.168601 | 5.108874  |
| ENSMUSG Egr1             | 33.63041 | 5.004486 | 6.71378  | 3.324508 | 2.632387 | 3.29161   |
| ENSMUSG Ahdc1            | 6.242015 | 6.296494 | 5.668373 | 4.643659 | 4.999753 | 4.838638  |
| ENSMUSG Vmn2r18          | 0.019964 | 0        | 0        | 0        | 0        | 0         |
| ENSMUSG Gm3573           | 0        | 0        | 0        | 0        | 0        | 0         |
| ENSMUSG 4930513O         | 0        | 0        | 0        | 0        | 0        | 0         |
| ENSMUSG Gm10408          | 0        | 0        | 0        | 0        | 0        | 0         |
| ENSMUSG Gm16440          | 0        | 0        | 0        | 0.03116  | 0.025715 | 0         |
| ENSMUSG Col4a5           | 18.73046 | 16.5575  | 16.34022 | 12.59622 | 11.14308 | 11.134396 |
| ENSMUSG Rab30            | 0.778073 | 0.530906 | 0.439246 | 1.860392 | 1.085907 | 1.191916  |
| ENSMUSG Ddias            | 0.236108 | 0.17759  | 0.296078 | 0.422273 | 0.516951 | 0.780945  |
| ENSMUSG Il16             | 8.651905 | 6.681089 | 8.006618 | 8.607993 | 8.328266 | 8.864542  |
| ENSMUSG Ndufc2           | 65.36166 | 67.31668 | 68.20807 | 68.61002 | 63.58741 | 68.337223 |
| ENSMUSG Prr22            | 0.072706 | 0.164025 | 0.037541 | 0.18523  | 0.029732 | 0.240534  |

|                    |          |          |          |          |          |           |
|--------------------|----------|----------|----------|----------|----------|-----------|
| ENSMUSG Anapc15    | 4.067078 | 3.261437 | 2.995663 | 3.982249 | 3.33136  | 3.917606  |
| ENSMUSG Mup17      | 0        | 0        | 0        | 0        | 0        | 0         |
| ENSMUSG Olfr470    | 0        | 0        | 0        | 0        | 0        | 0         |
| ENSMUSG Mfsd4b4    | 1.374205 | 1.30669  | 1.321101 | 1.7311   | 1.729819 | 2.004557  |
| ENSMUSG Gm20830    | 0        | 0        | 0        | 0        | 0        | 0         |
| ENSMUSG Gm3642     | 0        | 0        | 0        | 0        | 0        | 0         |
| ENSMUSG Olfr1468-ꜛ | 0        | 0        | 0        | 0        | 0        | 0         |
| ENSMUSG Gm10128    | 0        | 0        | 0        | 0        | 0        | 0         |
| ENSMUSG Tbrg1      | 37.71686 | 35.56415 | 35.35877 | 35.03897 | 33.65947 | 36.232191 |
| ENSMUSG Hacd1      | 4.831976 | 4.389882 | 4.573725 | 4.426459 | 5.496025 | 5.467757  |
| ENSMUSG Vmn2r12    | 0.010612 | 0.049811 | 0.026732 | 0.066743 | 0.034283 | 0.032743  |
| ENSMUSG Atp6v1fnb  | 0        | 0        | 0        | 0        | 0        | 0         |
| ENSMUSG Panx3      | 0        | 0        | 0.018556 | 0        | 0        | 0         |
| ENSMUSG Frg1       | 22.31747 | 21.35542 | 23.45766 | 20.49229 | 20.34893 | 21.901323 |
| ENSMUSG Asah1      | 41.04007 | 39.49871 | 42.39882 | 41.34888 | 42.02912 | 45.822634 |
| ENSMUSG Pcm1       | 17.20911 | 17.24804 | 13.94688 | 14.87062 | 13.84902 | 13.343509 |
| ENSMUSG Fgl1       | 0.048687 | 0        | 0        | 0.247973 | 0.406889 | 0.252105  |
| ENSMUSG Pdgfrl     | 1.476435 | 1.721625 | 1.658259 | 2.438587 | 2.685331 | 3.120934  |
| ENSMUSG Slc7a2     | 11.83535 | 11.66715 | 12.52969 | 25.55505 | 21.35576 | 22.481681 |
| ENSMUSG Klf2       | 143.7329 | 92.83795 | 142.5127 | 35.73521 | 58.8841  | 52.023544 |
| ENSMUSG Zfp780b    | 3.812168 | 3.847637 | 3.417812 | 3.56944  | 3.417661 | 3.573764  |
| ENSMUSG Chst7      | 5.721917 | 4.648164 | 5.417138 | 5.309149 | 6.465598 | 4.631124  |
| ENSMUSG Hrh4       | 0        | 0.072587 | 0.13575  | 0.051854 | 0        | 0.093951  |
| ENSMUSG Foxl1      | 0.266394 | 0.118921 | 0.131693 | 0.150985 | 0.292082 | 0.140131  |
| ENSMUSG Slc12a9    | 4.78349  | 3.778075 | 5.243515 | 4.746841 | 4.116311 | 4.418159  |
| ENSMUSG Taf2       | 8.236588 | 8.717456 | 7.638813 | 8.270932 | 7.789795 | 7.622129  |
| ENSMUSG Slc9a7     | 1.782451 | 1.634069 | 1.819224 | 2.544065 | 3.469734 | 2.127747  |
| ENSMUSG Zfp963     | 3.687829 | 3.640742 | 3.55378  | 3.073148 | 2.977179 | 3.099551  |
| ENSMUSG Nudt22     | 6.846406 | 7.199533 | 8.056335 | 8.892783 | 6.682539 | 8.496764  |
| ENSMUSG Paqr7      | 36.24309 | 33.23742 | 30.60929 | 23.36362 | 21.83139 | 22.922338 |
| ENSMUSG Plscr3     | 44.05365 | 39.51532 | 57.93533 | 25.82508 | 32.89791 | 37.77073  |
| ENSMUSG Arhgef25   | 13.43279 | 13.65455 | 14.44465 | 10.51414 | 8.858874 | 9.859093  |
| ENSMUSG Ptger1     | 1.79883  | 1.333354 | 1.964169 | 1.600315 | 1.077409 | 1.684068  |
| ENSMUSG Olfr820    | 0        | 0        | 0        | 0        | 0        | 0         |
| ENSMUSG Specc1l    | 46.12157 | 45.96264 | 39.81201 | 33.22178 | 33.19343 | 30.784371 |
| ENSMUSG E130114P1  | 0        | 0.159786 | 0.091061 | 0.133769 | 0.040298 | 0         |
| ENSMUSG Mageb2     | 0        | 0.020251 | 0        | 0        | 0.044754 | 0         |
| ENSMUSG Olfr1077-ꜛ | 0        | 0        | 0        | 0        | 0        | 0         |
| ENSMUSG Hbq1b      | 0.850491 | 2.02579  | 1.0052   | 0.52081  | 0.699266 | 0.358213  |
| ENSMUSG Gm9602     | 0        | 0        | 0        | 0        | 0        | 0         |
| ENSMUSG Vmn1r80    | 0        | 0        | 0        | 0        | 0        | 0         |
| Mus_musc Mus_musc  | 0        | 0        | 0        | 0.032375 | 0.074532 | 0.208459  |
| ENSMUSG Hoxa2      | 1.751796 | 0.970279 | 1.201574 | 1.18978  | 1.023785 | 1.000521  |
| ENSMUSG Rph3a      | 0        | 0        | 0        | 0        | 0        | 0         |
| ENSMUSG Gcsam      | 0.44676  | 0.563909 | 0.451516 | 0.680489 | 0.452229 | 0.663723  |
| ENSMUSG Tagln3     | 0.083098 | 0.200353 | 0.204903 | 0.164333 | 0        | 0.039065  |
| ENSMUSG Zkscan8    | 4.151372 | 3.762828 | 3.260726 | 3.636278 | 3.175851 | 3.032744  |
| ENSMUSG Nupl1      | 0        | 0        | 0.031148 | 0        | 0        | 0         |
| ENSMUSG lqcd       | 0.553654 | 0.814057 | 0.383541 | 0.53263  | 0.561206 | 0.579279  |
| ENSMUSG Morc1      | 0        | 0        | 0        | 0.045376 | 0        | 0.113476  |
| ENSMUSG Dtx1       | 1.945881 | 1.525272 | 1.561602 | 1.925002 | 1.334769 | 1.459659  |
| ENSMUSG Rasal1     | 0.132102 | 0.071103 | 0.080259 | 0.353974 | 0.30298  | 0.453809  |
| ENSMUSG Cd96       | 1.05475  | 0.970227 | 1.237163 | 0.978323 | 0.915681 | 1.09972   |
| ENSMUSG Nectin3    | 32.58054 | 31.13946 | 28.63024 | 22.65147 | 19.30199 | 20.139012 |
| ENSMUSG Ankrd61    | 0.402483 | 0.310141 | 0.242001 | 0.207099 | 0.268596 | 0.128791  |
| Mus_musc Mus_musc  | 1.542522 | 1.145316 | 2.08857  | 3.225356 | 2.101592 | 2.933866  |
| Mus_musc Mus_musc  | 0.443334 | 0.117954 | 0.11115  | 0.090804 | 0.161279 | 0.151399  |
| Mus_musc Mus_musc  | 0.359262 | 0.336109 | 0        | 0.169178 | 0.392457 | 0.161983  |
| Mus_musc Mus_musc  | 0.192049 | 0.210733 | 0.061772 | 0.148993 | 0.10048  | 0.124102  |
| ENSMUSG Gm30191    | 0        | 0        | 0        | 0        | 0        | 0         |
| Mus_musc Mus_musc  | 0        | 0        | 0        | 0        | 0        | 0         |
| Mus_musc Mus_musc  | 0.420796 | 0        | 0.238823 | 0.143947 | 0.313311 | 0.184186  |
| Mus_musc Mus_musc  | 0.254145 | 0.43613  | 0.158888 | 0.282688 | 0.128133 | 0         |
| Mus_musc Mus_musc  | 1.446868 | 1.786924 | 1.825524 | 1.084293 | 1.271933 | 1.335596  |



|                   |          |          |          |          |          |           |
|-------------------|----------|----------|----------|----------|----------|-----------|
| ENSMUSG Il17a     | 0        | 0        | 0        | 0.044581 | 0        | 0.04703   |
| ENSMUSG Terf1     | 7.059699 | 7.339951 | 6.954091 | 6.500098 | 5.699417 | 6.767987  |
| ENSMUSG Gm14325   | 6.183396 | 10.96606 | 5.433107 | 8.400026 | 7.945146 | 7.324859  |
| ENSMUSG Stau2     | 4.714412 | 4.899621 | 4.425153 | 4.663045 | 3.556695 | 4.552281  |
| ENSMUSG Rdh10     | 6.880472 | 7.533579 | 6.51073  | 6.334246 | 5.71202  | 6.918127  |
| ENSMUSG Olfr1034  | 0        | 0        | 0        | 0        | 0        | 0         |
| ENSMUSG Zfyve1    | 11.27496 | 11.94721 | 11.23384 | 10.61928 | 10.65267 | 9.46502   |
| ENSMUSG Gm45261   | 0        | 0        | 0        | 0        | 0        | 0         |
| ENSMUSG Zscan4-ps | 0        | 0        | 0        | 0        | 0        | 0         |
| ENSMUSG Gm45844   | 0.086447 | 0        | 0.028624 | 0.162944 | 0        | 0.084117  |
| ENSMUSG Gm45717   | 3.051389 | 3.297303 | 5.010301 | 3.033205 | 2.227524 | 3.118531  |
| ENSMUSG Unc93b1   | 33.59722 | 29.23098 | 36.58966 | 65.29378 | 56.24779 | 62.474926 |
| ENSMUSG C1ql2     | 0        | 0        | 0.02534  | 0        | 0        | 0.041442  |
| ENSMUSG Maff      | 13.77564 | 10.57423 | 11.62549 | 6.841157 | 8.101906 | 7.460691  |
| ENSMUSG C1qb      | 11.81003 | 14.35899 | 19.22844 | 86.15561 | 83.6936  | 91.508163 |
| ENSMUSG Neto2     | 0.764572 | 1.023233 | 0.789183 | 1.02034  | 0.594779 | 0.757571  |
| ENSMUSG Safb2     | 26.08563 | 25.02645 | 32.30154 | 25.4771  | 23.62231 | 24.816575 |
| ENSMUSG Shc1      | 27.38185 | 26.94682 | 28.58639 | 28.19555 | 30.64412 | 31.365904 |
| ENSMUSG Gja8      | 0.011976 | 0        | 0        | 0        | 0.024157 | 0         |
| ENSMUSG Tmem17    | 1.276647 | 0.777549 | 1.014264 | 1.260396 | 0.69075  | 1.048264  |
| ENSMUSG Rasl11b   | 13.48399 | 14.64188 | 14.88831 | 8.876985 | 9.086415 | 8.188918  |
| ENSMUSG 4921517D  | 0        | 0        | 0        | 0        | 0        | 0         |
| ENSMUSG Fignl1    | 0.42266  | 0.373943 | 0.512602 | 0.925529 | 1.190776 | 1.195935  |
| ENSMUSG Samt3     | 0        | 0        | 0        | 0        | 0        | 0         |
| ENSMUSG Prdm8     | 0.729783 | 0.715083 | 0.473426 | 0.334923 | 0.353498 | 0.598919  |
| ENSMUSG Foxa1     | 17.73276 | 17.36001 | 12.39116 | 12.95442 | 12.5164  | 13.06793  |
| ENSMUSG Cep112    | 1.149756 | 1.041062 | 0.918713 | 1.013324 | 0.535504 | 0.812392  |
| ENSMUSG Slc15a3   | 11.7102  | 10.978   | 12.35469 | 18.70444 | 18.87775 | 21.841383 |
| ENSMUSG Stab2     | 0.154975 | 0.127866 | 0.191501 | 0.382093 | 0.253718 | 0.280443  |
| ENSMUSG Fcho1     | 1.59452  | 0.848425 | 2.029189 | 3.66795  | 2.635984 | 3.104377  |
| ENSMUSG Ssbp4     | 30.76191 | 24.59717 | 25.8504  | 27.36074 | 32.98259 | 33.445358 |
| ENSMUSG Ell       | 10.71418 | 10.37755 | 10.75074 | 8.574356 | 8.682137 | 9.658146  |
| ENSMUSG Fam57a    | 8.629743 | 9.058751 | 9.653743 | 8.14169  | 7.475219 | 8.802242  |
| ENSMUSG Engase    | 2.59906  | 2.715566 | 2.581038 | 2.949761 | 2.330843 | 2.396107  |
| ENSMUSG Ston1     | 29.20844 | 30.49391 | 25.13285 | 19.59666 | 21.04474 | 16.367752 |
| ENSMUSG Kcnk10    | 0        | 0        | 0.037212 | 0.006998 | 0        | 0         |
| ENSMUSG Cacng7    | 1.555085 | 0.879814 | 1.751376 | 1.451052 | 1.476068 | 1.169399  |
| ENSMUSG Fbp1      | 2.116148 | 1.423839 | 1.897134 | 29.15553 | 44.49886 | 29.857227 |
| ENSMUSG Gm10277   | 0.041703 | 0.012842 | 0.084358 | 0.016605 | 0        | 0.06613   |
| ENSMUSG Ndufaf4   | 3.274501 | 3.470493 | 3.538682 | 3.036178 | 3.047552 | 3.128143  |
| ENSMUSG Clca3a2   | 0        | 0.019721 | 0.074446 | 0        | 0.056304 | 0         |
| ENSMUSG Spaca1    | 0.26626  | 0.179834 | 0        | 0.226061 | 0.077017 | 0.218346  |
| ENSMUSG Lmo4      | 40.32801 | 40.81119 | 46.28941 | 41.95375 | 40.25842 | 38.660139 |
| ENSMUSG Gbp3      | 11.43358 | 8.873764 | 63.12083 | 31.63395 | 9.226512 | 10.981064 |
| ENSMUSG Gm49352   | 0        | 0        | 0        | 0        | 0        | 0         |
| ENSMUSG Lingo4    | 0.1252   | 0.044409 | 0.097515 | 0.080921 | 0.05045  | 0.075039  |
| ENSMUSG Bod1      | 15.42065 | 15.9215  | 18.55447 | 12.18752 | 14.1873  | 13.3428   |
| ENSMUSG Zfp758    | 3.316967 | 3.826123 | 3.538889 | 3.547727 | 2.507478 | 3.2719    |
| ENSMUSG Gm8138    | 0        | 0        | 0        | 0        | 0        | 0         |
| ENSMUSG Gm16253   | 0.360788 | 0.661355 | 0.894731 | 0.638661 | 0.505343 | 0.532717  |
| ENSMUSG Prl8a2    | 0        | 0        | 0        | 0        | 0        | 0         |
| ENSMUSG Gm49345   | 0.331033 | 0.295387 | 0.110185 | 0.243505 | 0.615792 | 0.326886  |
| ENSMUSG D730048IC | 0        | 0        | 0        | 0        | 0        | 0         |
| ENSMUSG Nlrx1     | 4.213152 | 2.967477 | 4.344721 | 4.323638 | 4.224887 | 4.290935  |
| ENSMUSG Pus3      | 3.908508 | 4.34938  | 3.936404 | 4.22427  | 3.964376 | 3.446914  |
| ENSMUSG Ddx25     | 0.021802 | 0.006676 | 0.007309 | 0.007504 | 0        | 0.015672  |
| ENSMUSG Pdzd3     | 0        | 0.095203 | 0.115859 | 0.025948 | 0.041799 | 0.103306  |
| ENSMUSG Setdb2    | 3.043616 | 2.278727 | 3.112901 | 3.322025 | 3.095653 | 3.514366  |
| ENSMUSG Reg3b     | 0        | 0.312954 | 0        | 0.173127 | 0.142739 | 0.117145  |
| ENSMUSG Tbp1      | 10.28075 | 10.56689 | 11.96603 | 10.62111 | 10.06818 | 10.105556 |
| ENSMUSG Pura      | 12.31304 | 13.22035 | 11.13249 | 10.67181 | 11.26963 | 10.799463 |
| ENSMUSG Gpr75     | 0        | 0.015821 | 0        | 0.049958 | 0.013803 | 0.056653  |
| ENSMUSG Mgat2     | 27.04222 | 25.06829 | 26.37795 | 31.35046 | 33.8756  | 37.774601 |
| ENSMUSG 1700017D  | 0        | 0        | 0        | 0        | 0        | 0         |

|                   |          |          |          |          |          |           |
|-------------------|----------|----------|----------|----------|----------|-----------|
| ENSMUSG 1700025F2 | 0        | 0        | 0        | 0        | 0        | 0         |
| ENSMUSG Gas2l3    | 0.578361 | 0.450615 | 0.394686 | 1.815789 | 1.943312 | 2.524778  |
| ENSMUSG Ostf1     | 45.6644  | 44.44211 | 47.50558 | 45.93016 | 45.59103 | 45.653427 |
| ENSMUSG lqck      | 1.335284 | 2.263405 | 1.305366 | 1.53674  | 1.606072 | 1.462348  |
| ENSMUSG Trpm6     | 6.58438  | 6.469887 | 4.521469 | 5.62929  | 5.97678  | 5.565771  |
| ENSMUSG Carnmt1   | 3.868049 | 3.328355 | 3.061624 | 3.409472 | 3.039244 | 2.848366  |
| ENSMUSG Orc4      | 8.819436 | 9.401743 | 9.209877 | 8.473485 | 8.649949 | 7.996205  |
| ENSMUSG Mindy3    | 16.51045 | 16.18569 | 15.38148 | 14.29746 | 13.4109  | 13.991672 |
| ENSMUSG Mmadhc    | 24.26627 | 22.20144 | 25.57497 | 22.74009 | 23.39996 | 27.595111 |
| ENSMUSG Lypd6b    | 1.551424 | 1.465533 | 1.216843 | 1.608165 | 1.246657 | 1.499353  |
| ENSMUSG Kif5c     | 0.142477 | 0.196645 | 0.190694 | 0.37118  | 0.318597 | 0.373745  |
| ENSMUSG ltga8     | 41.7308  | 37.04926 | 44.52519 | 27.80534 | 25.7759  | 23.22936  |
| ENSMUSG Pcx       | 12.03672 | 13.5673  | 8.641187 | 19.77876 | 20.7549  | 25.371038 |
| ENSMUSG Slc29a2   | 0.474036 | 0.541643 | 0.487879 | 0.440672 | 0.547691 | 0.339166  |
| ENSMUSG Apba1     | 2.162872 | 2.442016 | 2.269404 | 2.622758 | 2.49891  | 2.857586  |
| ENSMUSG Minpp1    | 12.32453 | 11.8743  | 11.78689 | 10.58661 | 12.98029 | 12.135968 |
| ENSMUSG Papss2    | 12.47688 | 11.89077 | 11.76319 | 7.779264 | 7.681812 | 6.282145  |
| ENSMUSG Efcab2    | 2.790744 | 2.891898 | 2.36008  | 2.685171 | 1.881812 | 1.60543   |
| ENSMUSG Kif26b    | 1.589768 | 1.78239  | 0.849239 | 0.912384 | 0.655494 | 0.946438  |
| ENSMUSG Mixl1     | 0        | 0        | 0        | 0        | 0        | 0         |
| ENSMUSG Parp1     | 12.81932 | 12.48014 | 11.85583 | 17.54797 | 17.96135 | 17.856618 |
| ENSMUSG Lin7b     | 0.159949 | 0.076118 | 0.36438  | 0.275317 | 0.27018  | 0.230325  |
| ENSMUSG Bax       | 33.26241 | 35.06204 | 40.90939 | 41.67222 | 35.31593 | 38.761838 |
| ENSMUSG Tfb2m     | 8.095077 | 8.318681 | 7.56436  | 8.782842 | 7.354222 | 7.348459  |
| ENSMUSG Acbd3     | 16.95059 | 17.4836  | 17.62368 | 15.34516 | 16.86877 | 16.265514 |
| ENSMUSG Foxb1     | 0        | 0        | 0        | 0.028225 | 0.065693 | 0.055552  |
| ENSMUSG Gm11992   | 1.107505 | 1.946097 | 0.890364 | 2.094429 | 1.554253 | 1.278483  |
| ENSMUSG lgsf21    | 0        | 0.089903 | 0        | 0        | 0        | 0.02699   |
| ENSMUSG 9-Sep     | 36.17081 | 36.13471 | 35.31101 | 35.43477 | 41.36038 | 41.43408  |
| ENSMUSG Depp1     | 34.06195 | 24.36617 | 24.39908 | 10.27503 | 12.15716 | 10.468861 |
| ENSMUSG Mfrp      | 0.11932  | 0.259525 | 0.181201 | 0.099968 | 0.047359 | 0.201122  |
| ENSMUSG Mypop     | 2.315652 | 2.327534 | 2.108556 | 1.45416  | 2.18223  | 1.985307  |
| ENSMUSG Nova1     | 1.263755 | 1.511339 | 1.168312 | 0.6699   | 0.951656 | 0.860682  |
| ENSMUSG Zbtb8b    | 0.1405   | 0.120875 | 0.228374 | 0.318875 | 0.291243 | 0.149915  |
| ENSMUSG Mrpl4     | 35.27278 | 33.42705 | 31.54176 | 28.83803 | 29.58592 | 31.128591 |
| ENSMUSG Gm14496   | 0        | 0        | 0        | 0        | 0        | 0         |
| ENSMUSG Clec11a   | 0.839133 | 1.0468   | 0.819834 | 1.105862 | 1.178393 | 1.619206  |
| ENSMUSG Rgs21     | 0        | 0        | 0        | 0        | 0        | 0         |
| Mus_musc Mus_musc | 0        | 0        | 0.313813 | 0        | 0        | 0         |
| Mus_musc Mus_musc | 0        | 0.092978 | 0        | 0.458698 | 0.555787 | 0.586342  |
| Mus_musc Mus_musc | 0        | 0        | 0        | 0        | 0        | 0.184186  |
| Mus_musc Mus_musc | 0.532759 | 0.316523 | 0.502881 | 0.849992 | 0        | 0.504366  |
| Mus_musc Mus_musc | 0.306707 | 0.291614 | 0        | 0.262451 | 0        | 0.110377  |
| Mus_musc Mus_musc | 0        | 0.295801 | 0        | 0        | 0        | 0.115926  |
| Mus_musc Mus_musc | 0.898215 | 0.994309 | 0.266318 | 0.607094 | 0.896498 | 0.602414  |
| Mus_musc Mus_musc | 4.316502 | 3.189485 | 3.867068 | 3.01532  | 2.677883 | 2.862616  |
| Mus_musc Mus_musc | 0        | 0        | 0.275458 | 0.108439 | 0.106681 | 0.159689  |
| Mus_musc Mus_musc | 0        | 0.337707 | 0.329717 | 0        | 0        | 0         |
| Mus_musc Mus_musc | 0.063377 | 0.073179 | 0.044077 | 0.637231 | 0.214186 | 0.433191  |
| Mus_musc Mus_musc | 0        | 0.488026 | 0        | 0        | 0        | 0         |
| ENSMUSG Olfr1281  | 0        | 0        | 0        | 0        | 0        | 0         |
| Mus_musc Mus_musc | 0        | 0.416847 | 0.092931 | 0        | 0.216926 | 0.23159   |
| ENSMUSG Gm21095   | 0        | 0        | 0        | 0        | 0        | 0         |
| Mus_musc Mus_musc | 0.28193  | 0.210651 | 0.415831 | 0.676462 | 0.409485 | 0.460998  |
| Mus_musc Mus_musc | 0.042166 | 0        | 0.581095 | 0        | 0        | 0.639718  |
| ENSMUSG Lsm3      | 13.93707 | 14.59387 | 16.62496 | 16.43133 | 14.52632 | 14.200629 |
| ENSMUSG Chmp7     | 20.41742 | 21.30988 | 22.01062 | 19.43841 | 19.20119 | 20.084229 |
| ENSMUSG R3hcc1    | 8.49394  | 8.638054 | 9.341245 | 7.285983 | 7.065553 | 6.915606  |
| ENSMUSG Fam124b   | 1.273608 | 1.812148 | 1.308294 | 2.72349  | 2.181325 | 2.681378  |
| ENSMUSG Dhrrs11   | 3.880857 | 6.749601 | 6.425042 | 7.055406 | 7.057608 | 6.379441  |
| ENSMUSG Gm6020    | 0        | 0        | 0        | 0        | 0        | 0         |
| ENSMUSG Cyb561a3  | 23.87323 | 23.36927 | 23.04546 | 17.73318 | 14.11529 | 18.649895 |
| ENSMUSG Trmt5     | 3.887464 | 3.865354 | 3.572615 | 3.775779 | 3.5695   | 2.821337  |
| ENSMUSG Gm47289   | 0        | 0        | 0        | 0        | 0        | 0         |

|                   |          |          |          |          |          |           |
|-------------------|----------|----------|----------|----------|----------|-----------|
| ENSMUSG Slc22a13  | 0        | 0        | 0        | 0.037743 | 0.05556  | 0.034594  |
| ENSMUSG Dnase1    | 0.46138  | 0.535799 | 0.47168  | 0.432538 | 0.57687  | 0.638707  |
| ENSMUSG Trap1     | 29.10676 | 30.44359 | 28.13878 | 27.21325 | 27.58192 | 28.98774  |
| ENSMUSG Naa60     | 38.91564 | 34.92767 | 36.88491 | 31.74676 | 32.51175 | 29.861038 |
| ENSMUSG 1700037C: | 1.677237 | 1.480485 | 1.636075 | 2.393116 | 2.025393 | 2.691581  |
| Mus_musc Mus_musc | 0        | 0        | 0        | 0.169167 | 0        | 0.174848  |
| ENSMUSG Sh2d7     | 0        | 0.017424 | 0        | 0        | 0        | 0         |
| Mus_musc Mus_musc | 0        | 0.195596 | 0        | 0        | 0        | 0         |
| Mus_musc Mus_musc | 0        | 0.29523  | 0        | 0.412265 | 0        | 0.164142  |
| Mus_musc Mus_musc | 0        | 0        | 0.063036 | 0.2528   | 0        | 0         |
| Mus_musc Mus_musc | 0        | 0        | 0        | 0.363571 | 0        | 0         |
| Mus_musc Mus_musc | 0        | 0        | 0        | 0        | 0.342555 | 0         |
| ENSMUSG Sem1      | 24.96545 | 23.68249 | 24.30339 | 25.673   | 24.28776 | 24.983826 |
| ENSMUSG Acot5     | 0        | 0        | 0        | 0        | 0        | 0         |
| Mus_musc Mus_musc | 1.345156 | 0.706848 | 0.582806 | 1.071045 | 0.794857 | 0.850808  |
| Mus_musc Mus_musc | 0.170627 | 0.161311 | 0        | 0.12159  | 0.144678 | 0         |
| ENSMUSG Asxl1     | 12.11779 | 11.5244  | 11.12642 | 10.85981 | 11.25472 | 10.591864 |
| Mus_musc Mus_musc | 0.285757 | 0.34299  | 0.251314 | 0.312996 | 0.172831 | 0.228785  |
| Mus_musc Mus_musc | 10.67184 | 11.86152 | 11.74395 | 15.10822 | 12.98803 | 12.401044 |
| ENSMUSG Cox7c     | 46.09423 | 55.14254 | 56.87926 | 71.96991 | 64.5651  | 57.750846 |
| Mus_musc Mus_musc | 27.23454 | 27.4126  | 21.36527 | 22.92078 | 18.0082  | 19.811145 |
| ENSMUSG Prpf6     | 23.529   | 20.41378 | 21.11226 | 19.23958 | 18.46633 | 19.318598 |
| ENSMUSG Rgs20     | 0.159274 | 0        | 0.071236 | 0.036851 | 0.094407 | 0.019069  |
| ENSMUSG Rgs19     | 15.32415 | 14.54501 | 17.7812  | 23.17218 | 22.1213  | 23.024433 |
| ENSMUSG Myo1c     | 130.1083 | 111.1154 | 115.808  | 75.61548 | 76.20229 | 77.825521 |
| ENSMUSG Crk       | 55.53336 | 54.11853 | 53.13967 | 41.00692 | 41.79059 | 41.383709 |
| Mus_musc Mus_musc | 0.837409 | 0.80853  | 0.710606 | 0.919255 | 0.704197 | 0.798418  |
| ENSMUSG Psme2     | 43.47925 | 40.57475 | 65.30238 | 57.69652 | 32.53603 | 47.177234 |
| Mus_musc Mus_musc | 0.061307 | 0.092033 | 0.503786 | 0.256008 | 0        | 0.095206  |
| ENSMUSG A930004D  | 2.520919 | 2.116009 | 2.031383 | 1.471537 | 1.737452 | 1.731419  |
| Mus_musc Mus_musc | 0        | 0        | 0        | 0        | 0        | 0         |
| Mus_musc Mus_musc | 0        | 0.088177 | 0        | 0.453436 | 0.459797 | 0.209446  |
| Mus_musc Mus_musc | 0        | 0        | 0.320765 | 0        | 0        | 0         |
| Mus_musc Mus_musc | 1.233542 | 1.514654 | 1.98817  | 2.11496  | 2.095808 | 3.681486  |
| ENSMUSG Usp35     | 1.026566 | 0.997181 | 1.471976 | 1.640374 | 1.584741 | 1.648886  |
| ENSMUSG Dok3      | 8.758373 | 7.0134   | 11.7193  | 17.29656 | 13.86803 | 15.576858 |
| ENSMUSG Apoe      | 311.4478 | 283.8739 | 301.0841 | 723.7033 | 631.6649 | 719.00087 |
| ENSMUSG Tomm40    | 17.49919 | 14.04791 | 16.52728 | 15.1257  | 17.38117 | 18.523283 |
| ENSMUSG Olfr301   | 0        | 0        | 0        | 0        | 0        | 0         |
| ENSMUSG Clptm1    | 33.62681 | 31.52611 | 31.40781 | 26.65421 | 28.95335 | 31.381952 |
| ENSMUSG Sertad1   | 22.09267 | 21.38137 | 27.33926 | 14.89645 | 16.86638 | 16.781791 |
| ENSMUSG Relb      | 7.188692 | 9.077696 | 8.875962 | 11.9301  | 11.85698 | 12.49928  |
| ENSMUSG Zmiz2     | 19.35135 | 19.6185  | 19.80229 | 22.79471 | 22.96941 | 22.962443 |
| ENSMUSG Spem1     | 0        | 0        | 0.09737  | 0        | 0        | 0.044056  |
| ENSMUSG Otud3     | 8.220232 | 7.954545 | 6.905383 | 7.261454 | 8.092333 | 7.163277  |
| ENSMUSG Lonp1     | 20.01471 | 18.41108 | 19.8539  | 15.83465 | 16.60525 | 17.564822 |
| ENSMUSG Raver1    | 18.19876 | 9.290571 | 17.06476 | 3.926742 | 17.84765 | 19.1266   |
| ENSMUSG Vwc2      | 0.084812 | 0.039409 | 0.07168  | 0.079239 | 0.048071 | 0.044657  |
| ENSMUSG Ap2s1     | 43.02695 | 42.83333 | 50.27731 | 52.12779 | 50.78073 | 54.770668 |
| ENSMUSG Mid1ip1   | 98.63862 | 99.57791 | 101.7949 | 108.7826 | 92.84429 | 105.20886 |
| ENSMUSG Hist1h2bg | 5.554078 | 10.23447 | 10.40083 | 11.64283 | 11.60887 | 5.825861  |
| ENSMUSG Phtf1     | 11.26786 | 12.14024 | 8.96379  | 10.42194 | 9.999061 | 10.255624 |
| ENSMUSG Rnf212    | 0        | 0        | 0        | 0        | 0        | 0         |
| ENSMUSG Sulf1     | 11.37516 | 12.90041 | 8.847091 | 9.594734 | 6.556266 | 10.906613 |
| ENSMUSG Slc3a1    | 0.126763 | 0.139159 | 0.181646 | 0.069478 | 0.142049 | 0.123183  |
| ENSMUSG Samd7     | 0        | 0        | 0        | 0        | 0        | 0         |
| ENSMUSG Tbc1d22a  | 17.37024 | 14.52679 | 16.53646 | 13.56855 | 13.92058 | 15.38785  |
| ENSMUSG Olfr58    | 0        | 0        | 0        | 0        | 0        | 0         |
| ENSMUSG Samd12    | 5.116605 | 5.24471  | 3.901456 | 3.067715 | 2.80672  | 2.661102  |
| ENSMUSG Six2      | 0        | 0        | 0        | 0.049276 | 0.040352 | 0         |
| ENSMUSG Eif4b     | 69.50727 | 73.57464 | 64.84662 | 77.27996 | 77.17512 | 77.733223 |
| ENSMUSG Lad1      | 1.121561 | 1.373136 | 0.686243 | 1.81121  | 1.970312 | 2.225712  |
| ENSMUSG Cpsf2     | 7.202782 | 7.268217 | 7.471461 | 7.538934 | 7.536368 | 7.733798  |
| ENSMUSG Vmn1r24   | 0        | 0        | 0        | 0        | 0        | 0         |

|                    |          |          |          |          |          |           |
|--------------------|----------|----------|----------|----------|----------|-----------|
| Mus_musc Mus_musc  | 0.24515  | 0.193314 | 0.347611 | 0        | 0.062093 | 0.285468  |
| Mus_musc Mus_musc  | 0.196865 | 0.126912 | 0.183985 | 0.093962 | 0.378169 | 0.150698  |
| Mus_musc Mus_musc  | 0        | 0        | 0.294138 | 0.426649 | 0.09919  | 0.478074  |
| Mus_musc Mus_musc  | 0        | 0.129868 | 0        | 0.174016 | 0.17652  | 0.256467  |
| Mus_musc Mus_musc  | 0        | 0        | 0        | 0.522048 | 0        | 0         |
| Mus_musc Mus_musc  | 0        | 0        | 0        | 0        | 0        | 0         |
| Mus_musc Mus_musc  | 0.275839 | 0        | 0.184077 | 0.396051 | 0.102593 | 0         |
| Mus_musc Mus_musc  | 0.121234 | 0        | 0        | 0.218455 | 0.189053 | 0         |
| ENSMUSG Obp1a      | 0        | 0        | 0        | 0        | 0        | 0         |
| Mus_musc Mus_musc  | 0        | 0        | 0        | 0        | 0        | 0.015729  |
| Mus_musc Mus_musc  | 2.831436 | 3.108549 | 2.728054 | 3.453386 | 3.164576 | 2.427544  |
| ENSMUSG 1700040F1  | 0        | 0        | 0        | 0        | 0        | 0         |
| ENSMUSG Efhd2      | 42.89202 | 39.22021 | 48.30233 | 55.39173 | 56.61926 | 64.053612 |
| ENSMUSG Cop1       | 10.55767 | 11.14732 | 7.500767 | 9.971381 | 9.174783 | 11.112004 |
| ENSMUSG Ttc3       | 13.57239 | 12.75181 | 10.78667 | 9.72547  | 10.73976 | 9.251801  |
| ENSMUSG B4galt6    | 1.073994 | 1.175545 | 1.100281 | 1.559824 | 1.395757 | 1.630213  |
| ENSMUSG Fez2       | 28.95969 | 26.48863 | 30.31884 | 21.96338 | 22.9168  | 21.259477 |
| ENSMUSG Lix1       | 0.52302  | 0.421887 | 0.512322 | 0.433731 | 0.49845  | 0.182296  |
| ENSMUSG Flrt1      | 0.08756  | 0.155778 | 0.049279 | 0.084653 | 0.082401 | 0.136876  |
| ENSMUSG Gm43552    | 0        | 0        | 0        | 0        | 0        | 0         |
| ENSMUSG Gm30737    | 0        | 0        | 0        | 0        | 0        | 0         |
| ENSMUSG Slc38a9    | 2.065167 | 2.350412 | 2.050869 | 1.996583 | 2.201384 | 2.432746  |
| ENSMUSG Xlr3a      | 0.165628 | 0.141888 | 0.012118 | 0        | 0.077174 | 0         |
| ENSMUSG Zfp119a    | 2.679215 | 2.836752 | 2.628347 | 2.220043 | 2.490095 | 3.228462  |
| ENSMUSG Dhdds      | 16.77883 | 13.74631 | 14.36362 | 14.0946  | 15.56152 | 15.226837 |
| ENSMUSG Med15      | 17.99624 | 17.84087 | 18.26474 | 17.64793 | 17.91003 | 20.063346 |
| ENSMUSG Defa33     | 0        | 0        | 0        | 0        | 0        | 0         |
| ENSMUSG Btbd35f30  | 0        | 0        | 0        | 0        | 0        | 0         |
| ENSMUSG Mei4       | 0.181482 | 0.131885 | 0.147677 | 0.049663 | 0.069433 | 0.148591  |
| ENSMUSG Mc4r       | 0        | 0        | 0        | 0        | 0        | 0         |
| ENSMUSG Prss45     | 0.023199 | 0.036323 | 0        | 0        | 0        | 0.089701  |
| ENSMUSG Krtap1-5   | 0        | 0        | 0        | 0        | 0        | 0         |
| ENSMUSG Ptgs1      | 20.78169 | 21.69075 | 20.19001 | 20.59467 | 23.62857 | 23.864277 |
| ENSMUSG Ier2       | 73.00153 | 47.75538 | 56.94825 | 31.64384 | 29.78957 | 32.040298 |
| ENSMUSG Asb17      | 0        | 0        | 0        | 0        | 0        | 0         |
| ENSMUSG Hils1      | 0        | 0        | 0        | 0        | 0        | 0.063954  |
| ENSMUSG Txndc5     | 60.43582 | 51.30835 | 53.49614 | 122.6077 | 115.0405 | 121.59531 |
| ENSMUSG Cables2    | 8.191628 | 7.315076 | 9.285441 | 8.674897 | 8.556322 | 8.83834   |
| ENSMUSG Cyp26b1    | 1.68741  | 3.359961 | 1.332274 | 7.428981 | 2.138982 | 10.001162 |
| ENSMUSG Gm10131    | 8.570503 | 9.808283 | 9.061497 | 10.34356 | 8.922296 | 9.100078  |
| ENSMUSG Stk24      | 24.34203 | 25.50935 | 25.56296 | 26.707   | 25.31645 | 25.339788 |
| ENSMUSG Rac3       | 12.52891 | 11.64368 | 10.75097 | 6.274446 | 6.172266 | 8.059946  |
| ENSMUSG Usp47      | 26.94265 | 28.0734  | 24.9673  | 25.46356 | 27.68143 | 26.419158 |
| ENSMUSG Eid3       | 0.106191 | 0.06468  | 0.157803 | 0.079874 | 0.189124 | 0.145373  |
| ENSMUSG Hspa14     | 17.64118 | 16.83005 | 19.08759 | 18.42913 | 17.87989 | 16.752903 |
| ENSMUSG Zfp608     | 12.40241 | 12.06739 | 10.66929 | 8.749722 | 11.17426 | 10.481189 |
| ENSMUSG BC004004   | 14.61267 | 14.07812 | 14.05047 | 16.1209  | 13.72604 | 14.208279 |
| ENSMUSG Omt2a      | 0        | 0        | 0        | 0        | 0        | 0         |
| ENSMUSG Olfr10     | 0        | 0        | 0        | 0        | 0        | 0         |
| ENSMUSG Olfr300-ps | 0        | 0        | 0        | 0        | 0        | 0         |
| ENSMUSG Hmgb2      | 14.43322 | 14.08624 | 16.58376 | 21.39917 | 21.96245 | 23.419898 |
| ENSMUSG Zfp771     | 7.924193 | 3.628683 | 5.156379 | 3.80136  | 6.678572 | 7.423015  |
| ENSMUSG Zscan22    | 6.065608 | 4.882889 | 4.354401 | 4.231674 | 3.43982  | 3.59228   |
| ENSMUSG Pex13      | 5.965722 | 5.763031 | 5.236716 | 5.698703 | 5.090766 | 4.337246  |
| ENSMUSG Pcdhgb5    | 1.245045 | 2.077457 | 1.584497 | 1.291758 | 0.93081  | 1.23358   |
| ENSMUSG Ntn5       | 1.831205 | 1.707689 | 1.716381 | 2.200975 | 1.951363 | 2.25955   |
| ENSMUSG Slc6a21    | 0        | 0        | 0.014949 | 0        | 0        | 0         |
| ENSMUSG Myl2       | 0        | 0        | 0.058909 | 0.023196 | 0        | 0         |
| ENSMUSG Oxsr1      | 14.88429 | 16.01185 | 14.03083 | 12.57027 | 11.78855 | 11.21903  |
| ENSMUSG Cysrt1     | 0.039887 | 0.085581 | 0.145891 | 0.002106 | 0        | 0.084697  |
| ENSMUSG Rbm42      | 40.99783 | 37.9097  | 39.04544 | 32.61384 | 33.93626 | 34.274654 |
| ENSMUSG Mcrip1     | 44.90292 | 46.16633 | 50.38069 | 40.22265 | 37.5364  | 40.922363 |
| ENSMUSG Prcp       | 8.599    | 8.495097 | 8.517126 | 13.82757 | 13.93803 | 15.436074 |
| ENSMUSG Dnajc30    | 9.578449 | 10.43582 | 9.345073 | 8.221842 | 8.614926 | 7.809923  |

|                   |          |          |          |          |          |           |
|-------------------|----------|----------|----------|----------|----------|-----------|
| ENSMUSG Gm20716   | 12.82417 | 15.38906 | 10.88744 | 0        | 13.94432 | 0         |
| ENSMUSG Gm36245   | 0        | 0        | 0        | 0        | 0        | 0         |
| ENSMUSG Vmn1r39   | 0        | 0        | 0        | 0        | 0        | 0         |
| ENSMUSG DXBay18   | 0.369946 | 0.036663 | 0.121818 | 0.04545  | 0.094618 | 0.046722  |
| ENSMUSG Hist1h3f  | 0.08917  | 0.036711 | 0.060287 | 0        | 0.022208 | 0.077122  |
| ENSMUSG 4933412E2 | 0        | 0        | 0        | 0        | 0        | 0         |
| ENSMUSG Gm14698   | 1.057443 | 0.922222 | 2.584931 | 0.755031 | 2.300632 | 2.186598  |
| ENSMUSG Plod1     | 16.64624 | 19.18956 | 20.63605 | 17.29463 | 21.39235 | 20.442064 |
| ENSMUSG Fis1      | 93.23696 | 90.72889 | 94.38474 | 89.17444 | 86.02422 | 91.326082 |
| ENSMUSG Idi2      | 0        | 0        | 0        | 0.021935 | 0.074577 | 0.047825  |
| ENSMUSG Ppip5k1   | 8.103603 | 7.922104 | 8.008561 | 7.444783 | 8.141095 | 9.125606  |
| ENSMUSG Vmn2r11   | 0        | 0.006569 | 0        | 0        | 0        | 0         |
| ENSMUSG Otogl     | 0.006266 | 0        | 0.020975 | 0        | 0.006391 | 0.019505  |
| ENSMUSG Sycp2     | 0.059268 | 0.1508   | 0.175792 | 0.052141 | 0.041897 | 0.089629  |
| ENSMUSG Trim5     | 0.478648 | 0.266084 | 0.533242 | 0        | 0.108184 | 0.226953  |
| ENSMUSG Gng10     | 24.59804 | 19.83832 | 22.53413 | 29.0577  | 27.31315 | 27.974215 |
| ENSMUSG Olfr1183  | 0        | 0        | 0        | 0        | 0        | 0         |
| ENSMUSG Samd10    | 6.139293 | 6.001053 | 5.04497  | 5.35059  | 6.219855 | 5.580278  |
| ENSMUSG Ripor1    | 41.42234 | 36.61945 | 40.66501 | 24.92892 | 25.243   | 23.680645 |
| ENSMUSG 4930507D1 | 0.08722  | 0.049686 | 0.045126 | 0.033376 | 0        | 0.064465  |
| ENSMUSG Slc35f1   | 0.043726 | 0.034135 | 0.028823 | 0        | 0.019043 | 0.027138  |
| ENSMUSG Atp6v0a4  | 1.383066 | 1.187272 | 1.198369 | 1.915334 | 3.515939 | 3.202055  |
| ENSMUSG Dock10    | 12.55492 | 11.20619 | 12.3252  | 14.01946 | 13.5242  | 14.159332 |
| ENSMUSG Sh3glb1   | 47.70765 | 47.12976 | 46.04751 | 37.88367 | 37.84103 | 35.644811 |
| ENSMUSG Cavin3    | 22.08037 | 18.87865 | 20.60228 | 17.59238 | 18.55264 | 18.851828 |
| ENSMUSG Tbx20     | 0.04722  | 0.24203  | 0.044747 | 0.135771 | 0.10385  | 0.062766  |
| ENSMUSG Afg3l1    | 8.317726 | 8.615693 | 9.005091 | 10.55947 | 9.093339 | 10.013336 |
| ENSMUSG Glb1l3    | 0.9314   | 1.364882 | 1.020756 | 0.3924   | 0.382538 | 0.2466    |
| ENSMUSG P4ha2     | 22.59119 | 22.09273 | 23.76147 | 13.74883 | 15.65454 | 15.434733 |
| ENSMUSG Aars      | 16.51213 | 15.07375 | 17.15031 | 14.95364 | 15.85872 | 16.185643 |
| ENSMUSG Bmper     | 5.854469 | 4.529709 | 5.849109 | 3.950846 | 4.449464 | 3.821271  |
| ENSMUSG Cdh15     | 0.02554  | 0        | 0        | 0.212341 | 0.157635 | 0.220729  |
| ENSMUSG Arrb1     | 61.71852 | 59.59657 | 57.94691 | 52.95507 | 54.18935 | 52.841728 |
| ENSMUSG Acad8     | 9.438486 | 10.45217 | 10.01076 | 8.076755 | 9.351731 | 8.234481  |
| ENSMUSG Krtap1-4  | 0        | 0        | 0        | 0        | 0        | 0         |
| ENSMUSG Phf20l1   | 11.38385 | 12.18535 | 11.13092 | 11.53517 | 10.29157 | 10.123735 |
| ENSMUSG Prph      | 0.060558 | 0.573807 | 0.033461 | 0        | 0.05927  | 0.059459  |
| ENSMUSG Slc27a5   | 0.029339 | 0        | 0.040388 | 0.024186 | 0.035413 | 0         |
| ENSMUSG Mzf1      | 0.39615  | 0.334625 | 0.292442 | 0.471871 | 0.432805 | 0.25118   |
| ENSMUSG Zfp606    | 3.033777 | 3.326953 | 3.208484 | 3.202292 | 2.869167 | 2.963699  |
| ENSMUSG 2900092C1 | 0        | 0        | 0        | 0        | 0        | 0         |
| ENSMUSG Smok2a    | 0        | 0        | 0        | 0        | 0        | 0         |
| ENSMUSG Smok2b    | 0        | 0        | 0        | 0        | 0        | 0         |
| ENSMUSG Piga      | 3.537077 | 3.420876 | 3.799142 | 3.248787 | 3.061763 | 3.559542  |
| ENSMUSG Vegfd     | 25.53956 | 25.9949  | 35.40591 | 22.07452 | 22.6085  | 16.687777 |
| ENSMUSG Dusp9     | 0.348723 | 0.392179 | 0.326267 | 0.222475 | 0.075857 | 0.32642   |
| ENSMUSG Gm4553    | 0        | 0        | 0        | 0        | 0        | 0         |
| ENSMUSG Plxnb3    | 0.111724 | 0.09002  | 0.087438 | 0.28212  | 0.373911 | 0.240847  |
| ENSMUSG Asb9      | 0        | 0        | 0        | 0        | 0        | 0         |
| ENSMUSG Renbp     | 22.88014 | 22.76558 | 28.71426 | 27.46603 | 27.71925 | 32.178608 |
| ENSMUSG Hcfc1     | 18.16107 | 16.82395 | 16.08907 | 17.01401 | 15.70643 | 17.25925  |
| ENSMUSG Arhgap4   | 5.843373 | 4.19357  | 7.802362 | 9.686177 | 7.499752 | 8.577998  |
| ENSMUSG Naa10     | 16.8574  | 17.66732 | 18.78335 | 22.04935 | 21.12095 | 23.148545 |
| ENSMUSG Gm13288   | 0        | 0.016243 | 0.026674 | 0.013738 | 0        | 0         |
| ENSMUSG Ifna4     | 0        | 0        | 0        | 0        | 0        | 0         |
| ENSMUSG Gm10306   | 0        | 0        | 0        | 0        | 0        | 0         |
| ENSMUSG Zfp352    | 0        | 0        | 0        | 0        | 0        | 0         |
| ENSMUSG Foxb2     | 0        | 0        | 0        | 0        | 0        | 0         |
| ENSMUSG Gm21663   | 0        | 0        | 0        | 0        | 0        | 0         |
| ENSMUSG Olfr166   | 0.012905 | 0        | 0        | 0.011346 | 0.03162  | 0         |
| ENSMUSG Tsnax     | 26.34725 | 25.62652 | 23.91817 | 22.4124  | 20.74501 | 22.904623 |
| ENSMUSG Zfp663    | 0.349474 | 0.45569  | 0.775187 | 0.653136 | 0.457418 | 0.342754  |
| ENSMUSG Ccdc63    | 0        | 0.019264 | 0        | 0.071822 | 0.023469 | 0.039016  |
| ENSMUSG Sugp1     | 11.01004 | 10.80838 | 11.10565 | 9.270596 | 10.18448 | 10.023552 |

|                   |          |          |          |          |          |           |
|-------------------|----------|----------|----------|----------|----------|-----------|
| ENSMUSG Plin5     | 0.850213 | 1.260464 | 0.639422 | 1.286194 | 1.298386 | 0.972867  |
| ENSMUSG 4930447A  | 0        | 0.067036 | 0        | 0        | 0        | 0         |
| ENSMUSG Rsph4a    | 4.034021 | 4.981399 | 2.759676 | 5.721079 | 6.046275 | 5.258492  |
| ENSMUSG Ywhaz     | 125.4494 | 114.866  | 121.6895 | 102.9763 | 103.8029 | 107.28976 |
| ENSMUSG Grhl2     | 5.39011  | 6.100477 | 4.493244 | 5.523796 | 5.302824 | 5.229127  |
| ENSMUSG Rnf19a    | 24.63773 | 26.02735 | 23.89915 | 18.58036 | 18.92597 | 19.737935 |
| ENSMUSG Pabpc1    | 141.5146 | 147.4534 | 144.1687 | 171.4105 | 170.9188 | 165.21021 |
| ENSMUSG Sp9       | 0        | 0        | 0        | 0        | 0        | 0.0122    |
| ENSMUSG Sf3b4     | 24.44767 | 20.1768  | 21.94657 | 18.44412 | 20.09809 | 19.718267 |
| ENSMUSG Hist2h2ac | 0.8303   | 1.643442 | 0.508624 | 0.479883 | 0.608904 | 1.508792  |
| ENSMUSG Hist2h2be | 3.569798 | 4.42738  | 2.861858 | 4.244998 | 4.147563 | 3.662987  |
| ENSMUSG Zcchc2    | 6.752365 | 6.62388  | 6.660332 | 6.494222 | 6.719045 | 6.584867  |
| ENSMUSG Stx12     | 35.51932 | 33.66645 | 34.4888  | 28.09946 | 30.41084 | 29.59507  |
| ENSMUSG Fam76a    | 29.39334 | 29.08741 | 27.14457 | 16.91518 | 18.66072 | 16.77701  |
| ENSMUSG Snca      | 8.395324 | 10.76832 | 15.48785 | 4.500099 | 4.129984 | 3.462814  |
| ENSMUSG Casp1     | 4.280824 | 4.254689 | 7.472293 | 11.35526 | 9.478534 | 9.06942   |
| ENSMUSG Rspo1     | 7.910238 | 8.465386 | 6.740774 | 6.016461 | 3.511221 | 5.851679  |
| ENSMUSG Cdca8     | 1.290292 | 1.19852  | 1.290337 | 3.132037 | 4.630629 | 4.087364  |
| ENSMUSG Smad7     | 21.68027 | 18.89098 | 21.44397 | 12.96571 | 12.57804 | 9.975491  |
| ENSMUSG Casp12    | 4.86457  | 3.976841 | 6.386458 | 7.221621 | 4.432784 | 5.021596  |
| ENSMUSG Fgr       | 6.86125  | 6.180965 | 8.57255  | 9.04432  | 8.077504 | 7.770706  |
| ENSMUSG Myo5b     | 17.25758 | 18.98932 | 14.27541 | 12.56358 | 12.22184 | 13.626171 |
| ENSMUSG Epha10    | 0.012105 | 0        | 0        | 0        | 0        | 0.011858  |
| ENSMUSG Mon2      | 18.39185 | 18.85778 | 16.79825 | 16.93573 | 18.0352  | 18.072073 |
| ENSMUSG 2700049A  | 2.228312 | 2.138256 | 1.693884 | 1.731647 | 1.859604 | 1.822045  |
| ENSMUSG Pof1b     | 6.430279 | 7.328876 | 6.24679  | 8.617606 | 6.81343  | 7.225258  |
| ENSMUSG Nol8      | 5.412847 | 6.084132 | 5.429413 | 6.118538 | 5.563989 | 5.138527  |
| ENSMUSG Cenpp     | 0.37053  | 0.188006 | 0.287563 | 0.662627 | 1.023699 | 0.746443  |
| ENSMUSG Ogn       | 106.2027 | 109.7119 | 115.2464 | 99.66962 | 100.0896 | 85.318069 |
| ENSMUSG Nxn12     | 0.08894  | 0.542661 | 0.265202 | 0.087679 | 0.095026 | 0.384471  |
| ENSMUSG Spin1     | 26.24855 | 27.25448 | 26.37969 | 20.89194 | 20.30246 | 19.674364 |
| ENSMUSG Defb12    | 0        | 0        | 0        | 0        | 0        | 0         |
| ENSMUSG Qars      | 23.66087 | 22.67831 | 22.90851 | 28.81675 | 28.00689 | 30.110353 |
| ENSMUSG Amt       | 3.376438 | 3.369159 | 3.354245 | 2.744432 | 2.990844 | 2.919821  |
| ENSMUSG Nicn1     | 7.595218 | 9.850798 | 8.017141 | 7.293586 | 7.484542 | 6.887901  |
| ENSMUSG Prkar2a   | 22.84392 | 24.97035 | 24.00894 | 20.12806 | 20.18749 | 19.89773  |
| ENSMUSG Ncor2     | 28.1359  | 27.4849  | 24.80602 | 23.82363 | 22.19821 | 23.786023 |
| ENSMUSG Slc25a20  | 14.99198 | 12.86704 | 12.57807 | 11.90474 | 12.31122 | 11.965547 |
| ENSMUSG Morn3     | 1.294164 | 0.796733 | 0.623688 | 1.218805 | 1.112707 | 1.369979  |
| ENSMUSG Rnf34     | 7.415812 | 7.752725 | 7.3944   | 7.62188  | 6.196724 | 7.280377  |
| ENSMUSG Kdm2b     | 5.998431 | 5.622387 | 5.539929 | 7.275446 | 7.916331 | 8.32847   |
| ENSMUSG Anapc5    | 62.8585  | 60.84147 | 67.94659 | 58.32851 | 53.21473 | 61.296184 |
| ENSMUSG P2rx4     | 26.4992  | 28.57383 | 28.88323 | 45.60337 | 45.6212  | 47.454656 |
| ENSMUSG Camkk2    | 7.817536 | 7.770459 | 7.700104 | 7.224585 | 7.275481 | 7.635494  |
| ENSMUSG Exog      | 3.415034 | 3.149455 | 3.036311 | 2.454553 | 3.750475 | 3.216189  |
| ENSMUSG Muc1      | 75.77303 | 71.14888 | 61.78151 | 81.20046 | 79.63371 | 86.540489 |
| ENSMUSG Ly96      | 1.72263  | 1.575566 | 1.947577 | 5.798522 | 2.668342 | 4.11971   |
| ENSMUSG Crisp4    | 0        | 0        | 0        | 0        | 0        | 0         |
| ENSMUSG Gdap1     | 0.014285 | 0.040678 | 0        | 0.046269 | 0        | 0.040018  |
| ENSMUSG Crisp1d1  | 0.63933  | 0.54041  | 0.498989 | 0.593219 | 0.494785 | 0.670826  |
| ENSMUSG Fam166b   | 2.992689 | 2.578214 | 2.048923 | 4.962089 | 4.655769 | 3.99811   |
| ENSMUSG Gm48552   | 0.242802 | 0.370914 | 1.634048 | 0.69384  | 0.118352 | 0.405431  |
| ENSMUSG Cartpt    | 0        | 0        | 0        | 0        | 0        | 0         |
| ENSMUSG Mccc2     | 8.399487 | 9.717051 | 7.803417 | 6.5793   | 7.513465 | 7.844563  |
| ENSMUSG Naip1     | 0.111819 | 0.088602 | 0.116097 | 0.393665 | 0.395898 | 0.566986  |
| ENSMUSG Serf1     | 3.370174 | 4.091387 | 3.94681  | 5.495701 | 5.719744 | 4.340176  |
| ENSMUSG Mrgprx2   | 0        | 0        | 0        | 0.011324 | 0        | 0         |
| ENSMUSG Rbm15b    | 9.674122 | 11.50535 | 10.72513 | 9.442371 | 9.53052  | 8.926596  |
| ENSMUSG Pigu      | 13.61401 | 15.73346 | 15.96244 | 15.03671 | 16.15893 | 15.483353 |
| ENSMUSG Rras      | 75.52903 | 68.96051 | 86.68548 | 53.43614 | 58.46373 | 59.775174 |
| ENSMUSG Setd1b    | 9.502104 | 9.321235 | 8.980867 | 7.684466 | 7.971043 | 7.767504  |
| ENSMUSG Olfr640   | 0        | 0        | 0        | 0        | 0        | 0         |
| ENSMUSG Mpp6      | 3.466737 | 4.111813 | 3.562578 | 7.004253 | 8.644445 | 7.707533  |
| ENSMUSG Zc2hc1c   | 1.880314 | 2.060521 | 1.479756 | 1.344762 | 1.496538 | 1.248538  |

|                    |          |          |          |          |          |           |
|--------------------|----------|----------|----------|----------|----------|-----------|
| ENSMUSG Pcdhb7     | 1.613816 | 1.187533 | 1.717011 | 0.914765 | 1.072748 | 0.87211   |
| ENSMUSG Cnmd       | 0.148409 | 0.229328 | 0        | 0.078204 | 0.041122 | 0         |
| ENSMUSG Sarnp      | 2.775923 | 5.167524 | 4.848718 | 11.03169 | 3.355621 | 3.103166  |
| ENSMUSG Aplnr      | 41.4999  | 31.28277 | 26.73845 | 20.24459 | 22.69405 | 17.40926  |
| ENSMUSG Alkbh2     | 2.344828 | 1.711737 | 2.283576 | 3.126117 | 1.97809  | 2.87924   |
| ENSMUSG Ackr3      | 11.91327 | 9.952419 | 14.23677 | 7.094806 | 7.430197 | 7.282471  |
| ENSMUSG Micu1      | 29.24991 | 28.65869 | 28.25467 | 23.41393 | 23.92407 | 24.884651 |
| ENSMUSG Pno1       | 12.44357 | 11.12531 | 12.53514 | 12.73502 | 13.2664  | 13.509774 |
| ENSMUSG Cand1      | 11.37056 | 11.42232 | 10.50967 | 9.994121 | 10.3834  | 10.654264 |
| ENSMUSG Tbk1       | 19.29189 | 19.01437 | 20.52318 | 19.01838 | 17.72367 | 18.308299 |
| ENSMUSG Aspm       | 0.259913 | 0.176126 | 0.191936 | 0.652331 | 0.806489 | 1.006164  |
| Mus_musc Mus_musc  | 0        | 0.167386 | 0        | 0.485813 | 0        | 0         |
| ENSMUSG Tnks1bp1   | 41.89075 | 39.96042 | 38.79241 | 26.92613 | 26.88016 | 27.794569 |
| ENSMUSG Cst8       | 1.70538  | 1.608924 | 1.762063 | 0.844757 | 0.592818 | 0.653357  |
| ENSMUSG Olfr1181   | 0        | 0        | 0        | 0        | 0        | 0         |
| Mus_musc Mus_musc  | 0        | 0        | 0        | 0        | 0        | 0         |
| ENSMUSG Cst3       | 750.6224 | 729.9517 | 758.0176 | 839.4442 | 748.9882 | 853.67974 |
| ENSMUSG Ttc30a1    | 1.439579 | 1.532627 | 1.175922 | 1.648968 | 1.538551 | 1.400979  |
| ENSMUSG Pde11a     | 0.07065  | 0.022065 | 0.030206 | 0        | 0.042898 | 0.031966  |
| ENSMUSG Ttc30b     | 6.158352 | 6.412471 | 4.815045 | 7.163051 | 6.331165 | 6.904268  |
| ENSMUSG Ttc30a2    | 0.316158 | 0.523875 | 0.272375 | 0.685721 | 0.402065 | 0.434074  |
| ENSMUSG Rtn4r      | 0        | 0.053188 | 0.026151 | 0.087367 | 0.074465 | 0.264209  |
| Mus_musc Mus_musc  | 0.030426 | 0        | 0        | 0.262995 | 0.108149 | 0         |
| ENSMUSG Drap1      | 88.55753 | 87.82998 | 99.01251 | 73.41443 | 68.02702 | 67.659794 |
| ENSMUSG Fosl1      | 2.130035 | 2.105006 | 1.918865 | 1.403037 | 1.278192 | 1.381559  |
| ENSMUSG Lrp5       | 42.46138 | 41.12653 | 48.4546  | 29.26363 | 32.52267 | 28.839554 |
| ENSMUSG Ctsw       | 2.4512   | 1.968195 | 8.194637 | 3.943614 | 3.434109 | 4.362463  |
| ENSMUSG Fibp       | 19.7133  | 17.36597 | 17.51373 | 17.37286 | 16.29828 | 17.558072 |
| Mus_musc Mus_musc  | 0.192272 | 0.288363 | 0.384872 | 0.202171 | 0        | 1.119141  |
| Mus_musc Mus_musc  | 0.261785 | 0.065847 | 0.105342 | 0.062756 | 0        | 0         |
| ENSMUSG Cers1      | 0.603562 | 0.761    | 0.536045 | 0.354085 | 0.392421 | 0.524949  |
| Mus_musc Mus_musc  | 0        | 0        | 0        | 0        | 0.315645 | 0         |
| Mus_musc Mus_musc  | 0.372238 | 0.214464 | 0        | 0.069985 | 0        | 0         |
| ENSMUSG Kantr      | 2.767839 | 2.943453 | 3.09235  | 2.34236  | 2.063411 | 2.149146  |
| Mus_musc Mus_musc  | 0        | 0        | 0        | 0        | 0        | 0.184186  |
| Mus_musc Mus_musc  | 0        | 0        | 0        | 0.220421 | 0        | 0         |
| ENSMUSG Tmed4      | 38.54421 | 42.62801 | 45.22483 | 31.87408 | 31.34703 | 32.889477 |
| ENSMUSG Ddx56      | 12.60278 | 11.16391 | 12.7745  | 10.0273  | 11.12122 | 10.34052  |
| ENSMUSG Rbms2      | 30.81668 | 30.45043 | 31.50747 | 23.37813 | 23.47433 | 21.983793 |
| ENSMUSG Ift88      | 5.489038 | 5.377294 | 4.144079 | 5.166308 | 4.795724 | 5.117448  |
| ENSMUSG Mthfd2     | 1.85752  | 1.470786 | 3.11673  | 4.959032 | 4.870532 | 4.855831  |
| ENSMUSG Gm49425    | 0        | 0        | 0        | 0        | 0        | 0         |
| ENSMUSG Olfr732    | 0        | 0        | 0        | 0        | 0        | 0         |
| ENSMUSG Ckap5      | 11.17825 | 11.44044 | 10.13864 | 9.188465 | 10.83391 | 10.267371 |
| ENSMUSG Tex2       | 9.8637   | 10.79972 | 9.813773 | 9.1281   | 10.09373 | 10.256738 |
| ENSMUSG Pitpnm3    | 6.426848 | 7.378881 | 6.403981 | 5.767602 | 5.842203 | 6.152396  |
| ENSMUSG Tmem225    | 0        | 0        | 0        | 0        | 0        | 0         |
| ENSMUSG Olfr1268-Ꞥ | 0        | 0        | 0        | 0        | 0        | 0         |
| ENSMUSG Trp53bp2   | 35.20007 | 30.15975 | 29.40183 | 20.40546 | 20.56579 | 21.916664 |
| ENSMUSG Srp9       | 34.95406 | 33.34782 | 40.14418 | 47.09029 | 46.18839 | 44.598806 |
| ENSMUSG Cnih3      | 0.033124 | 0.011567 | 0        | 0        | 0.010426 | 0         |
| ENSMUSG Nvl        | 4.003205 | 4.070414 | 3.618502 | 3.721781 | 3.851891 | 4.466782  |
| ENSMUSG Tmem63a    | 26.8123  | 26.32159 | 26.93616 | 23.60868 | 24.2051  | 23.697299 |
| ENSMUSG Gm21903    | 0        | 0        | 0        | 0        | 0        | 0         |
| ENSMUSG Gm21904    | 0        | 0        | 0        | 0        | 0        | 0         |
| ENSMUSG Tdpoz5     | 0        | 0        | 0        | 0        | 0        | 0         |
| ENSMUSG Coro1c     | 58.54677 | 50.88698 | 53.63586 | 48.31541 | 51.01707 | 54.049984 |
| Mus_musc Mus_musc  | 0.798752 | 0.454822 | 0.486581 | 0.541339 | 0.430856 | 0.793856  |
| Mus_musc Mus_musc  | 0.073738 | 0.053394 | 0.141462 | 0.309897 | 0.531223 | 0.348828  |
| ENSMUSG Tax1bp1    | 98.87486 | 89.64024 | 88.3207  | 74.3224  | 75.28435 | 72.156962 |
| Mus_musc Mus_musc  | 0.29595  | 0.294441 | 0.408854 | 0.224957 | 0        | 0.145314  |
| ENSMUSG Catsperb   | 0.01771  | 0        | 0        | 0        | 0        | 0         |
| ENSMUSG Klrg2      | 1.257882 | 0.990351 | 0.932905 | 0.910636 | 1.478868 | 1.162471  |
| ENSMUSG Fbxo41     | 0.024356 | 0.055967 | 0        | 0.021897 | 0.042676 | 0.0311    |

|                   |          |          |          |          |          |           |
|-------------------|----------|----------|----------|----------|----------|-----------|
| ENSMUSG Ttc29     | 2.561111 | 3.202749 | 1.784688 | 3.610873 | 3.123583 | 3.175485  |
| ENSMUSG Dmd       | 6.419923 | 6.149253 | 7.20938  | 4.260495 | 2.552832 | 4.638618  |
| ENSMUSG Crot      | 12.36313 | 12.5189  | 10.38577 | 12.46164 | 12.28225 | 11.209695 |
| ENSMUSG Dcaf15    | 6.79421  | 5.687055 | 8.288585 | 7.373503 | 6.777506 | 8.604137  |
| ENSMUSG Sec24b    | 16.47223 | 16.04197 | 14.75678 | 14.00982 | 15.27861 | 14.544093 |
| ENSMUSG Socs5     | 11.85728 | 13.5641  | 12.27772 | 9.3673   | 10.01673 | 10.646251 |
| ENSMUSG Atp2a1    | 0.402052 | 1.662339 | 0.473024 | 0.96783  | 0.692428 | 0.273343  |
| ENSMUSG Fam131b   | 0.183038 | 0.197248 | 0.214011 | 0.162695 | 0.204343 | 0.11552   |
| ENSMUSG Zyx       | 75.46009 | 62.42397 | 82.15514 | 61.93685 | 59.86166 | 66.321961 |
| ENSMUSG Casp2     | 10.86624 | 12.57033 | 11.76334 | 11.07142 | 10.26094 | 10.42087  |
| ENSMUSG Clcn1     | 0.031825 | 0.0454   | 0.039172 | 0.014726 | 0.032704 | 0.015587  |
| ENSMUSG Sval1     | 0        | 0        | 0        | 0        | 0        | 0         |
| ENSMUSG Gstk1     | 32.19818 | 32.42407 | 29.52134 | 25.00011 | 23.51596 | 22.071362 |
| ENSMUSG Llcf1     | 0        | 0        | 0        | 0        | 0        | 0         |
| ENSMUSG Kel       | 0        | 0.031047 | 0        | 0        | 0        | 0         |
| ENSMUSG Ephb6     | 3.189162 | 2.848889 | 2.347885 | 2.523304 | 1.534976 | 2.658387  |
| ENSMUSG Trpv6     | 1.55739  | 1.831074 | 1.619068 | 2.506476 | 1.783605 | 1.774195  |
| Mus_musc Mus_musc | 0.716629 | 0.415789 | 0.422186 | 0.60808  | 0.204445 | 0.569839  |
| Mus_musc Mus_musc | 14.34539 | 15.4607  | 11.25505 | 35.45891 | 52.20583 | 48.458092 |
| ENSMUSG Otog      | 0        | 0        | 0        | 0        | 0        | 0         |
| Mus_musc Mus_musc | 1.522318 | 1.840918 | 1.384328 | 1.309453 | 1.297934 | 1.191619  |
| Mus_musc Mus_musc | 4.292896 | 0        | 4.357416 | 1.431895 | 2.143081 | 0         |
| Mus_musc Mus_musc | 3.284926 | 4.30687  | 5.526394 | 6.985563 | 7.593735 | 8.902299  |
| Mus_musc Mus_musc | 0.308765 | 0.133178 | 0.121969 | 0.074693 | 0.148237 | 0.170621  |
| Mus_musc Mus_musc | 0        | 0        | 0        | 0        | 0        | 0         |
| Mus_musc Mus_musc | 0.168138 | 0        | 0.378025 | 0        | 0        | 0.180449  |
| Mus_musc Mus_musc | 0.571984 | 0.873145 | 1.229017 | 0.447043 | 0.878361 | 0.665674  |
| Mus_musc Mus_musc | 0        | 0        | 0        | 0.174016 | 0        | 0         |
| Mus_musc Mus_musc | 0.293329 | 0.229978 | 0        | 0        | 0.181161 | 0.167814  |
| ENSMUSG Rhox2d    | 0        | 0        | 0        | 0        | 0        | 0         |
| ENSMUSG Olfr786   | 0        | 0        | 0        | 0        | 0        | 0         |
| ENSMUSG Ube2a     | 19.25826 | 18.55796 | 17.99242 | 18.88649 | 18.57908 | 17.829713 |
| ENSMUSG Gm21905   | 0        | 0        | 0        | 0        | 0        | 0         |
| ENSMUSG Tshz2     | 4.428705 | 4.284999 | 3.083948 | 5.077147 | 5.726912 | 4.674018  |
| ENSMUSG Gm16503   | 0.061971 | 0.047378 | 0        | 0.084346 | 0.014957 | 0         |
| ENSMUSG Erich3    | 1.164824 | 1.61441  | 0.785548 | 1.781124 | 1.737038 | 1.654335  |
| ENSMUSG Ankrd16   | 9.301755 | 9.85459  | 11.50376 | 8.827728 | 8.555592 | 9.103909  |
| ENSMUSG mt-Co3    | 1757.547 | 2021.716 | 1725.672 | 2344.71  | 2019.738 | 1833.1478 |
| Mus_musc Mus_musc | 0.373683 | 0.045281 | 0        | 0        | 0.120738 | 0.06295   |
| Mus_musc Mus_musc | 0        | 0        | 0        | 0        | 0        | 0.101987  |
| ENSMUSG mt-Co1    | 5211.775 | 6115.043 | 5225.002 | 6303.204 | 6482.064 | 5716.9395 |
| ENSMUSG Cluap1    | 8.261069 | 7.802883 | 8.057278 | 6.447318 | 7.73036  | 7.216839  |
| Mus_musc Mus_musc | 0.506196 | 0.424011 | 0.918002 | 0.580989 | 0.576501 | 0.586317  |
| Mus_musc Mus_musc | 0.07658  | 0        | 0        | 0        | 0.186692 | 0         |
| Mus_musc Mus_musc | 0        | 0        | 0        | 0        | 0.235556 | 0.251163  |
| Mus_musc Mus_musc | 0        | 0        | 0        | 0        | 0        | 0         |
| ENSMUSG Sbsn      | 2.621158 | 2.517451 | 1.590239 | 1.757564 | 0.742822 | 2.441679  |
| ENSMUSG Eid2      | 3.673097 | 3.681916 | 3.820793 | 2.928897 | 3.681809 | 3.400697  |
| ENSMUSG Ergic1    | 23.63429 | 22.08045 | 23.5291  | 24.95301 | 27.39906 | 26.97432  |
| ENSMUSG A930002H  | 0.238097 | 1.14697  | 0.545265 | 0.632754 | 0.738042 | 0.841941  |
| ENSMUSG Hcar2     | 4.423026 | 3.882117 | 4.003874 | 3.20875  | 3.643886 | 2.958527  |
| ENSMUSG Sys1      | 13.28606 | 5.335469 | 8.508687 | 6.890541 | 11.02128 | 11.516597 |
| ENSMUSG Olfr1367  | 0        | 0        | 0        | 0        | 0        | 0         |
| ENSMUSG Gpr150    | 0        | 0        | 0        | 0.146446 | 0.038453 | 0.009784  |
| ENSMUSG H2a1h     | 0        | 0        | 0        | 0        | 0        | 0         |
| ENSMUSG Fgf14     | 0.10595  | 0.185103 | 0.104274 | 0.063086 | 0.084498 | 0.107102  |
| ENSMUSG Gm21936   | 0        | 0        | 0        | 0        | 0        | 0         |
| ENSMUSG Mococ     | 5.572706 | 5.14358  | 6.083534 | 6.241514 | 6.122133 | 6.257384  |
| ENSMUSG Farp1     | 23.62912 | 21.81331 | 21.761   | 15.76844 | 15.79456 | 15.673818 |
| ENSMUSG Nat9      | 14.7807  | 15.55701 | 17.28399 | 17.78146 | 15.42677 | 16.233694 |
| ENSMUSG Chtf18    | 0.862014 | 0.666941 | 0.61524  | 0.998479 | 1.17533  | 1.367512  |
| ENSMUSG Gm5150    | 1.93601  | 1.67232  | 2.442187 | 2.818932 | 3.349911 | 2.622222  |
| ENSMUSG BC024978  | 2.761094 | 2.193191 | 2.159524 | 2.091923 | 2.037539 | 2.10739   |
| ENSMUSG Cyp2t4    | 0.138827 | 0.34243  | 0.226725 | 0.136066 | 0.062164 | 0.124016  |



|                   |          |          |          |          |          |           |
|-------------------|----------|----------|----------|----------|----------|-----------|
| ENSMUSG 1810022K  | 19.43141 | 18.24672 | 19.78986 | 23.84139 | 19.59351 | 17.829056 |
| ENSMUSG Dph1      | 3.571513 | 2.818217 | 2.434867 | 3.925641 | 3.326868 | 3.153611  |
| ENSMUSG Btd35f12  | 0        | 0        | 0        | 0        | 0        | 0         |
| Mus_musc Mus_musc | 0        | 0        | 0.298927 | 0        | 0        | 0.271976  |
| Mus_musc Mus_musc | 0        | 0        | 0        | 0.115939 | 0.171043 | 0.315825  |
| Mus_musc Mus_musc | 0        | 0        | 0        | 0.147889 | 0        | 0         |
| Mus_musc Mus_musc | 0.332352 | 0.257316 | 0.656657 | 0.101698 | 0.321741 | 0.107641  |
| ENSMUSG Eif1ax    | 13.71135 | 13.18067 | 13.32296 | 11.38776 | 10.73719 | 10.726089 |
| ENSMUSG Frat1     | 0.982238 | 0.687072 | 0.385826 | 0.770158 | 0.688419 | 0.614917  |
| ENSMUSG Ostc      | 34.74916 | 37.93036 | 41.57302 | 50.73085 | 55.39811 | 55.768639 |
| ENSMUSG Hk2       | 3.800585 | 4.171615 | 3.772286 | 4.9054   | 4.847042 | 5.748512  |
| ENSMUSG Rgs10     | 14.80743 | 16.39335 | 15.69883 | 23.89643 | 21.6471  | 24.781534 |
| ENSMUSG Sema4f    | 6.979989 | 6.423293 | 6.899322 | 5.053113 | 5.224996 | 5.375908  |
| Mus_musc Mus_musc | 0        | 0        | 0        | 0.228435 | 0        | 0         |
| Mus_musc Mus_musc | 0.38842  | 0.900092 | 0.454397 | 1.30972  | 1.359903 | 0.920168  |
| Mus_musc Mus_musc | 4.056746 | 4.864416 | 4.316297 | 3.65915  | 3.617266 | 3.808518  |
| Mus_musc Mus_musc | 0        | 0        | 0        | 0        | 0        | 0         |
| Mus_musc Mus_musc | 7.315897 | 6.226134 | 8.095404 | 6.466617 | 5.580991 | 4.771829  |
| Mus_musc Mus_musc | 0.357099 | 0.345355 | 0.255064 | 0.872389 | 1.040979 | 1.212573  |
| Mus_musc Mus_musc | 0        | 0        | 0        | 0        | 0        | 0         |
| ENSMUSG Naaladl1  | 0.192442 | 0.048905 | 0.058934 | 0.073269 | 0.029454 | 0.188623  |
| ENSMUSG Slc2a8    | 7.620752 | 6.576547 | 6.751316 | 5.784877 | 6.010132 | 5.931239  |
| ENSMUSG AV320801  | 0.007627 | 0.02971  | 0        | 0.03281  | 0.033201 | 0.049683  |
| ENSMUSG Mup4      | 0        | 0        | 0        | 0        | 0        | 0         |
| ENSMUSG Olfr517   | 0        | 0        | 0        | 0        | 0        | 0         |
| ENSMUSG Olfr514   | 0        | 0        | 0        | 0        | 0        | 0         |
| ENSMUSG Olfr467   | 0        | 0        | 0        | 0        | 0        | 0         |
| ENSMUSG Rrs1      | 8.044037 | 7.188039 | 8.39418  | 8.229825 | 8.81237  | 8.726722  |
| ENSMUSG Elmo3     | 9.422439 | 9.611389 | 8.185797 | 8.53119  | 7.170064 | 8.428079  |
| ENSMUSG Gm4985    | 0        | 0        | 0        | 0        | 0        | 0         |
| ENSMUSG Ttbk2     | 5.598496 | 5.904686 | 4.393498 | 4.066988 | 4.47629  | 4.161482  |
| ENSMUSG Gm11492   | 0        | 0        | 0        | 0        | 0        | 0         |
| ENSMUSG Pfpl      | 0        | 0        | 0        | 0        | 0        | 0         |
| ENSMUSG Plcb2     | 4.152671 | 3.225388 | 3.37887  | 5.609902 | 5.598367 | 5.60565   |
| ENSMUSG Vmn2r100  | 0        | 0        | 0        | 0        | 0        | 0         |
| ENSMUSG Fam71f2   | 2.313265 | 1.605985 | 1.065022 | 0.789414 | 0.902135 | 0.94934   |
| Mus_musc Mus_musc | 0        | 0        | 0        | 0        | 0        | 0         |
| ENSMUSG Zfp658    | 1.883218 | 1.930378 | 2.149282 | 2.038822 | 2.155549 | 1.935408  |
| ENSMUSG Trnp1     | 1.20356  | 0.95459  | 1.013617 | 0.49764  | 0.435145 | 0.823827  |
| ENSMUSG Vmn1r211  | 0        | 0        | 0        | 0        | 0        | 0         |
| ENSMUSG Cyp19a1   | 0        | 0        | 0        | 0        | 0        | 0         |
| ENSMUSG Olfr120   | 0        | 0        | 0        | 0        | 0        | 0         |
| Mus_musc Mus_musc | 0        | 0.30563  | 0        | 0.238482 | 0.271224 | 0         |
| ENSMUSG Ints9     | 9.750808 | 9.291276 | 8.913498 | 7.854154 | 9.089626 | 9.791972  |
| ENSMUSG Tagap1    | 5.999114 | 6.161692 | 5.867864 | 5.897808 | 5.187496 | 5.528336  |
| ENSMUSG Pfdn4     | 8.482644 | 7.801206 | 8.673552 | 10.62054 | 8.994431 | 8.328996  |
| ENSMUSG Rdh16     | 0        | 0        | 0        | 0        | 0        | 0         |
| ENSMUSG Idh3a     | 18.69207 | 22.01159 | 20.0456  | 20.24368 | 20.19689 | 20.740268 |
| ENSMUSG Eloc      | 16.2527  | 17.50187 | 18.5939  | 16.57912 | 14.02362 | 18.385762 |
| ENSMUSG Ext1      | 6.39796  | 6.455797 | 5.831627 | 6.348921 | 7.157409 | 6.384675  |
| ENSMUSG Tmc6      | 14.4655  | 15.53448 | 15.73813 | 14.70451 | 13.82212 | 15.400735 |
| ENSMUSG Tnrc6c    | 11.39242 | 10.72739 | 8.301668 | 7.378478 | 7.902536 | 9.08415   |
| ENSMUSG Net1      | 41.80886 | 41.59275 | 32.69397 | 29.15578 | 32.07865 | 29.379819 |
| ENSMUSG Cbx2      | 1.806334 | 2.049188 | 1.921488 | 1.886549 | 1.628348 | 1.788982  |
| ENSMUSG Rbfox3    | 2.448018 | 2.538415 | 2.195492 | 1.351118 | 1.04656  | 0.956829  |
| ENSMUSG Cant1     | 21.04253 | 21.22179 | 22.06718 | 21.09212 | 20.32934 | 23.385415 |
| ENSMUSG Tk1       | 1.455846 | 1.826781 | 1.371718 | 3.952213 | 5.569425 | 5.999784  |
| ENSMUSG lft52     | 12.1156  | 14.07938 | 11.40163 | 10.84079 | 12.66867 | 12.026634 |
| ENSMUSG Gaa       | 19.69979 | 18.2181  | 20.30252 | 22.771   | 23.55729 | 26.046751 |
| ENSMUSG Cbx8      | 2.925685 | 2.304768 | 3.124021 | 2.717378 | 3.141907 | 3.860785  |
| ENSMUSG Bmp1      | 9.887077 | 9.836619 | 11.51482 | 11.02128 | 10.85095 | 11.024063 |
| ENSMUSG Sart1     | 12.30899 | 11.06328 | 12.45626 | 8.717522 | 10.16793 | 10.594201 |
| ENSMUSG Ifi44l    | 1.457244 | 1.314544 | 4.102717 | 2.26828  | 1.661915 | 1.490891  |
| ENSMUSG Camk1d    | 2.758042 | 2.564145 | 2.937726 | 5.231133 | 5.265142 | 5.806999  |

|                   |          |          |          |          |          |           |
|-------------------|----------|----------|----------|----------|----------|-----------|
| ENSMUSG Synj2     | 5.202913 | 4.78087  | 4.311416 | 5.059729 | 5.03473  | 5.613069  |
| ENSMUSG Rsph3b    | 5.300662 | 7.343141 | 5.751379 | 7.217037 | 6.713876 | 9.128184  |
| ENSMUSG Tiam2     | 0.620917 | 0.558561 | 0.480429 | 0.630457 | 0.655592 | 0.588163  |
| ENSMUSG Nox3      | 0        | 0        | 0        | 0        | 0        | 0         |
| ENSMUSG Rps6ka2   | 7.381756 | 7.393372 | 7.164047 | 5.446257 | 6.573427 | 5.754895  |
| ENSMUSG Obp1b     | 0        | 0        | 0        | 0        | 0        | 0         |
| ENSMUSG Brd9      | 16.50332 | 14.06061 | 16.39879 | 13.8127  | 12.48172 | 14.054142 |
| ENSMUSG Ppp3cc    | 5.978462 | 4.997558 | 5.989761 | 8.827948 | 8.509212 | 9.461101  |
| ENSMUSG Ccl3      | 1.362369 | 0.92646  | 2.033189 | 3.196127 | 4.584686 | 3.934156  |
| ENSMUSG Tln2      | 4.73811  | 5.231173 | 4.10493  | 3.420112 | 3.437759 | 3.163853  |
| ENSMUSG Pim3      | 33.25794 | 31.68954 | 28.0662  | 16.68841 | 23.32904 | 19.342249 |
| ENSMUSG Ppp1r26   | 3.240802 | 3.457245 | 3.048863 | 2.147839 | 2.365863 | 2.005308  |
| ENSMUSG Trmt112   | 25.05962 | 26.14466 | 25.86934 | 24.64281 | 23.89663 | 24.236125 |
| ENSMUSG Gngt2     | 22.5649  | 22.66562 | 33.09033 | 28.66924 | 25.33436 | 28.640332 |
| ENSMUSG Tk2       | 11.44884 | 11.28685 | 11.56403 | 11.45277 | 9.482249 | 11.862792 |
| ENSMUSG Zfp943    | 6.009197 | 6.53488  | 5.774237 | 6.1823   | 4.46498  | 4.783404  |
| ENSMUSG Gm4303    | 0        | 0        | 0        | 0        | 0        | 0         |
| ENSMUSG Bmyc      | 17.18795 | 15.71066 | 16.93177 | 15.21446 | 15.04288 | 13.552211 |
| ENSMUSG Mrpl35    | 3.322592 | 3.479881 | 3.431025 | 3.527206 | 3.600037 | 3.496299  |
| ENSMUSG Gng5      | 97.64124 | 101.8434 | 95.87856 | 102.428  | 104.0094 | 97.357331 |
| ENSMUSG Aard      | 7.278545 | 7.405128 | 6.767973 | 4.168771 | 5.160631 | 5.161177  |
| ENSMUSG Igf1      | 1.054419 | 1.156353 | 0.732453 | 12.53529 | 13.36096 | 16.61194  |
| ENSMUSG Capza1    | 41.92283 | 37.53882 | 37.11394 | 43.0869  | 47.12255 | 47.45404  |
| ENSMUSG Ccdc102a  | 5.737147 | 5.852995 | 5.539551 | 4.899375 | 4.807054 | 5.395911  |
| ENSMUSG Dram1     | 122.6386 | 129.089  | 108.8802 | 118.9032 | 112.8881 | 129.48392 |
| ENSMUSG Washc3    | 12.0066  | 13.51026 | 11.7272  | 13.67143 | 14.17978 | 15.14034  |
| ENSMUSG Olfr406   | 0        | 0        | 0        | 0        | 0        | 0         |
| ENSMUSG Slc35a4   | 31.74679 | 29.52044 | 29.7775  | 27.40914 | 27.87097 | 31.812048 |
| ENSMUSG Gm21440   | 0        | 0        | 0        | 0        | 0        | 0         |
| ENSMUSG Olfr403   | 0        | 0        | 0        | 0        | 0        | 0         |
| ENSMUSG Amer2     | 0.03814  | 0.021899 | 0.041937 | 0.032912 | 0.010662 | 0.060794  |
| ENSMUSG Mtmr6     | 27.11024 | 27.76217 | 26.36314 | 21.65699 | 22.95513 | 22.389449 |
| ENSMUSG 4932438H  | 0.09948  | 0.070428 | 0.046892 | 0.114433 | 0.082147 | 0.180961  |
| ENSMUSG Endov     | 6.316771 | 6.094745 | 5.271913 | 4.604499 | 5.645521 | 5.357044  |
| ENSMUSG Trim14    | 6.441794 | 5.417038 | 5.963323 | 7.625585 | 6.957394 | 8.792356  |
| ENSMUSG Rere      | 25.5479  | 26.40762 | 25.29332 | 20.45044 | 21.24958 | 19.104779 |
| ENSMUSG Adam10    | 30.09985 | 31.6464  | 31.70909 | 37.64385 | 38.1948  | 38.672596 |
| ENSMUSG Emcn      | 20.33121 | 20.23277 | 15.43395 | 11.08099 | 11.7806  | 13.569655 |
| ENSMUSG Ptrhd1    | 1.004563 | 1.22126  | 1.362562 | 1.196697 | 1.230415 | 0.928468  |
| ENSMUSG Kctd17    | 9.365634 | 11.50348 | 10.68522 | 13.90545 | 13.2631  | 12.427766 |
| ENSMUSG Wdr3      | 8.74524  | 8.679828 | 9.020823 | 8.995614 | 8.506461 | 9.576208  |
| ENSMUSG 4930555G  | 0        | 0        | 0        | 0        | 0        | 0         |
| ENSMUSG Btbd35f2  | 0        | 0        | 0        | 0        | 0        | 0         |
| ENSMUSG Acsl3     | 7.621093 | 8.003113 | 7.173101 | 8.724516 | 9.212578 | 10.155358 |
| Mus_musc Mus_musc | 0        | 0.058683 | 0.314385 | 0        | 0.137283 | 0         |
| ENSMUSG C030006K  | 8.517157 | 7.300229 | 7.893825 | 8.283866 | 6.352725 | 7.343216  |
| ENSMUSG Haspin    | 0.797494 | 0.593349 | 0.898788 | 1.429038 | 1.637245 | 1.362651  |
| ENSMUSG Gm6685    | 8.978009 | 10.47546 | 6.217028 | 7.292962 | 6.454815 | 6.604789  |
| ENSMUSG Synj2bp   | 16.76237 | 17.00163 | 16.27453 | 13.70165 | 13.19833 | 13.222692 |
| ENSMUSG Sh3bp2    | 5.668343 | 5.411241 | 7.524146 | 9.293221 | 8.968478 | 9.786536  |
| ENSMUSG Ms4a5     | 0        | 0        | 0        | 0        | 0        | 0         |
| ENSMUSG Fam53b    | 23.23884 | 21.06488 | 18.62015 | 18.00274 | 19.82918 | 17.397675 |
| ENSMUSG Olfr1500  | 0        | 0        | 0        | 0        | 0        | 0         |
| ENSMUSG Gp2       | 0        | 0.218282 | 0        | 10.56692 | 3.645325 | 3.564092  |
| ENSMUSG Vmn1r235  | 0        | 0        | 0        | 0        | 0        | 0         |
| ENSMUSG Bambl     | 6.009298 | 4.278387 | 4.443014 | 2.54851  | 2.541172 | 2.80178   |
| ENSMUSG Hmx2      | 0        | 0        | 0        | 0        | 0.013842 | 0.01729   |
| ENSMUSG Dcpp1     | 0        | 0        | 0        | 0        | 0        | 0         |
| ENSMUSG Tmem160   | 5.967658 | 6.881955 | 7.495392 | 8.512699 | 9.740887 | 9.40868   |
| ENSMUSG Gm8104    | 0        | 0        | 0        | 0.037271 | 0        | 0.046829  |
| ENSMUSG Taar8a    | 0        | 0        | 0        | 0        | 0        | 0         |
| ENSMUSG Tmem255   | 0.369888 | 0.524497 | 0.286142 | 0.31395  | 0.428509 | 0.147022  |
| ENSMUSG Rnf13     | 44.39645 | 45.39843 | 44.56883 | 43.62614 | 43.43909 | 42.792467 |
| ENSMUSG Mnd1      | 0.890517 | 0.719787 | 0.657306 | 0.910452 | 1.122501 | 0.828312  |

|                    |          |          |          |          |          |           |
|--------------------|----------|----------|----------|----------|----------|-----------|
| ENSMUSG Fam13b     | 17.73904 | 18.46308 | 16.86645 | 15.09755 | 15.81865 | 14.657075 |
| ENSMUSG Phpt1      | 14.36514 | 16.09526 | 14.7619  | 16.9585  | 13.12346 | 14.132019 |
| ENSMUSG Lypd5      | 0        | 0        | 0        | 0        | 0.06237  | 0         |
| ENSMUSG Slc18b1    | 4.594737 | 5.628156 | 4.567999 | 4.803514 | 4.473847 | 5.06701   |
| ENSMUSG Zfp108     | 0.962563 | 1.319007 | 1.283181 | 0.950503 | 1.110519 | 0.848478  |
| ENSMUSG Pri2c1     | 0        | 0        | 0        | 0        | 0        | 0         |
| ENSMUSG Slc22a20   | 0        | 0        | 0        | 0.022933 | 0        | 0         |
| ENSMUSG Olfr709-ps | 0        | 0        | 0        | 0        | 0        | 0         |
| ENSMUSG Azin1      | 27.76347 | 29.89588 | 26.58636 | 31.88559 | 30.40844 | 34.083261 |
| ENSMUSG Crct1      | 0        | 0        | 0        | 0.072709 | 0        | 0         |
| ENSMUSG Lce1m      | 0        | 0        | 0        | 0        | 0        | 0         |
| ENSMUSG Spink13    | 0        | 0        | 0        | 0        | 0        | 0         |
| ENSMUSG Ppp1r12b   | 8.500908 | 9.262283 | 8.287867 | 8.032203 | 7.421901 | 7.787676  |
| ENSMUSG Lce1g      | 0        | 0        | 0        | 0        | 0        | 0         |
| ENSMUSG Gm4951     | 2.089104 | 1.639004 | 11.1069  | 9.310819 | 1.805093 | 1.984755  |
| Mus_musc Mus_musc  | 0        | 0.603721 | 0        | 0        | 0        | 0         |
| ENSMUSG Il18rap    | 2.246205 | 1.408636 | 5.458479 | 1.948703 | 1.589195 | 1.691018  |
| ENSMUSG Il1rl1     | 0.917212 | 1.162259 | 1.06471  | 2.963443 | 3.81711  | 3.593603  |
| ENSMUSG Nosip      | 27.60774 | 26.18759 | 29.42643 | 21.09723 | 21.17998 | 21.570815 |
| ENSMUSG Fcgrt      | 49.84686 | 45.4328  | 46.06537 | 44.53546 | 55.13835 | 50.695421 |
| ENSMUSG Pih1d1     | 24.8767  | 25.06043 | 25.92783 | 24.80673 | 24.56432 | 23.919733 |
| ENSMUSG Slc9a2     | 0.611574 | 0.626326 | 0.326216 | 0.295418 | 0.305425 | 0.180296  |
| ENSMUSG Pih1d3     | 0        | 0        | 0        | 0        | 0        | 0         |
| ENSMUSG Rps11      | 360.3116 | 370.4262 | 380.9976 | 452.9624 | 402.7639 | 442.01418 |
| ENSMUSG Slc9a4     | 1.842626 | 2.032699 | 2.091875 | 2.559074 | 2.300199 | 2.959834  |
| ENSMUSG Arhgdib    | 61.22998 | 54.9268  | 80.53902 | 90.9014  | 86.34962 | 97.462037 |
| ENSMUSG Cd300ld3   | 3.939036 | 2.934945 | 4.8417   | 13.61749 | 9.740862 | 12.735943 |
| ENSMUSG Rerg       | 7.20722  | 6.27262  | 7.951529 | 2.720998 | 3.814424 | 2.588786  |
| ENSMUSG Ank3       | 9.05976  | 10.46302 | 8.865433 | 12.48343 | 10.75018 | 14.455051 |
| ENSMUSG Strap      | 28.96298 | 29.26001 | 29.83435 | 28.34506 | 27.61152 | 30.837122 |
| ENSMUSG Lmo3       | 0        | 0        | 0        | 0        | 0        | 0         |
| ENSMUSG Pik3c2g    | 1.237934 | 1.320942 | 0.854625 | 1.602439 | 1.68057  | 0.946217  |
| ENSMUSG Cd300ld4   | 3.371443 | 2.205803 | 3.635461 | 11.75761 | 8.6158   | 9.773315  |
| ENSMUSG Igsf8      | 16.41569 | 17.81707 | 18.35312 | 23.08805 | 22.77753 | 25.220215 |
| ENSMUSG Dtx3l      | 9.506645 | 8.216356 | 13.36791 | 11.31364 | 8.606249 | 9.149604  |
| ENSMUSG Socs1      | 0.830437 | 0.45582  | 1.431167 | 1.977151 | 2.036571 | 2.33247   |
| ENSMUSG Proser1    | 6.217336 | 5.747761 | 5.793487 | 4.404901 | 4.954611 | 4.606036  |
| ENSMUSG Sppl2c     | 0        | 0        | 0        | 0        | 0        | 0         |
| ENSMUSG Gcc2       | 13.52846 | 12.94633 | 13.31556 | 11.41891 | 11.39454 | 10.138022 |
| ENSMUSG Bcl9l      | 22.53787 | 22.10985 | 22.51023 | 16.56554 | 16.4367  | 16.763401 |
| ENSMUSG Zfp947     | 0.290493 | 0.513218 | 0.23064  | 0.385962 | 0.394121 | 0.334896  |
| ENSMUSG Mtbp       | 1.959194 | 1.988293 | 2.035324 | 1.846027 | 2.178943 | 2.130818  |
| ENSMUSG Olfr1387   | 0        | 0        | 0        | 0        | 0        | 0         |
| ENSMUSG Gm29394    | 0.311695 | 0.24536  | 0.280719 | 0.18561  | 0.138768 | 0.372064  |
| ENSMUSG Zhx1       | 22.35816 | 24.30701 | 22.319   | 18.61311 | 18.63216 | 18.265529 |
| ENSMUSG Atad2      | 4.852792 | 5.665312 | 4.699064 | 5.548895 | 5.663062 | 5.811864  |
| ENSMUSG Has2       | 0.04287  | 0.017554 | 0.011962 | 0.167815 | 0.138268 | 0.305774  |
| ENSMUSG Slc22a22   | 0        | 0.080543 | 0        | 0.034171 | 0.087906 | 0         |
| ENSMUSG Derl1      | 34.70418 | 32.19174 | 33.32658 | 37.19627 | 37.96855 | 37.214787 |
| ENSMUSG Tbc1d31    | 1.905241 | 2.386788 | 2.345051 | 3.489386 | 3.128448 | 2.864683  |
| ENSMUSG Rprml      | 16.47882 | 13.63081 | 19.0846  | 10.93562 | 9.507261 | 10.489316 |
| ENSMUSG Olfr735    | 0        | 0        | 0        | 0        | 0        | 0         |
| ENSMUSG Cym        | 0        | 0        | 0.033213 | 0.078701 | 0        | 0         |
| ENSMUSG Zfp619     | 1.207036 | 0.909207 | 1.092212 | 0.775828 | 0.841507 | 0.773064  |
| ENSMUSG Olfr338    | 0.004619 | 0        | 0        | 0        | 0        | 0         |
| ENSMUSG Gm8113     | 0.37574  | 0.545952 | 0.435658 | 5.011098 | 5.148139 | 3.568574  |
| ENSMUSG Fxyd7      | 0.835916 | 0.704902 | 0.858152 | 0.147165 | 0.286369 | 0.329834  |
| ENSMUSG Bricd5     | 0.013612 | 0        | 0.014329 | 0        | 0        | 0.044646  |
| ENSMUSG Tet3       | 12.95643 | 13.10372 | 11.60563 | 10.78371 | 12.47548 | 11.801209 |
| ENSMUSG Tespa1     | 0.988959 | 0.949122 | 1.458201 | 1.584038 | 1.730276 | 1.485961  |
| ENSMUSG Gnat1      | 0.072716 | 0.108507 | 0.25921  | 0.190536 | 0.065438 | 0.088691  |
| ENSMUSG Larp6      | 0.768463 | 1.422428 | 1.182899 | 0.929988 | 0.926269 | 0.823629  |
| ENSMUSG Unc5cl     | 0.08898  | 0.259466 | 0.148519 | 0.651431 | 0.348235 | 0.247788  |
| ENSMUSG Snrpn      | 7.595552 | 9.349981 | 7.821793 | 6.56087  | 5.474956 | 5.411089  |

|                   |          |          |          |          |          |           |
|-------------------|----------|----------|----------|----------|----------|-----------|
| ENSMUSG Apccd1    | 5.29108  | 5.405951 | 5.010445 | 2.870744 | 3.429363 | 3.570443  |
| ENSMUSG Dagla     | 3.021152 | 2.963181 | 2.89238  | 2.776554 | 2.875333 | 2.734097  |
| ENSMUSG Eps15l1   | 15.94145 | 13.47577 | 16.24601 | 13.16605 | 13.35019 | 14.324536 |
| ENSMUSG Atp6v1b2  | 59.14916 | 57.29692 | 59.20206 | 78.45841 | 82.95511 | 87.477203 |
| ENSMUSG Vax1      | 0        | 0        | 0        | 0        | 0        | 0         |
| ENSMUSG Cyp2c37   | 0        | 0        | 0        | 0        | 0        | 0         |
| ENSMUSG Grk3      | 11.90675 | 12.45918 | 12.26199 | 12.1979  | 11.74498 | 12.83291  |
| ENSMUSG Tmc7      | 1.03895  | 1.222373 | 0.93123  | 0.948668 | 0.665251 | 0.739338  |
| ENSMUSG Pglyrp3   | 0        | 0        | 0        | 0.130944 | 0        | 0         |
| ENSMUSG E330021D  | 0        | 0.020187 | 0        | 0.032566 | 0        | 0         |
| ENSMUSG Crybb2    | 0        | 0        | 0        | 0        | 0        | 0         |
| ENSMUSG Ctsd      | 353.264  | 326.8961 | 369.7658 | 597.2705 | 714.6199 | 880.22754 |
| ENSMUSG Rplp1     | 680.0826 | 668.0107 | 756.9083 | 780.0593 | 727.2658 | 776.85944 |
| ENSMUSG Gm10959   | 0        | 0        | 0        | 0        | 0        | 0         |
| ENSMUSG Gm47985   | 0        | 0        | 0        | 0        | 0.014364 | 0.03237   |
| ENSMUSG Cbs       | 1.846052 | 1.913312 | 1.397243 | 0.785338 | 0.9312   | 0.777462  |
| ENSMUSG Ndufv3    | 20.78094 | 25.64116 | 23.94389 | 26.86462 | 24.74803 | 30.277629 |
| ENSMUSG Vmn1r139  | 0        | 0        | 0        | 0        | 0        | 0         |
| ENSMUSG Gm11146   | 0        | 0        | 0.036955 | 0        | 0        | 0         |
| ENSMUSG Rsph1     | 9.93877  | 13.31488 | 7.474337 | 16.70189 | 16.45951 | 15.270526 |
| ENSMUSG Tff1      | 0        | 0        | 0        | 3.872769 | 2.010262 | 3.9076    |
| ENSMUSG Tmprss3   | 0        | 0        | 0        | 0.058288 | 0.057789 | 0         |
| ENSMUSG Wdr4      | 4.733572 | 3.98884  | 4.679878 | 3.882107 | 3.831754 | 4.265626  |
| ENSMUSG Slc37a1   | 12.6852  | 11.23926 | 11.33938 | 8.569658 | 8.933542 | 8.496256  |
| ENSMUSG Bcl2l15   | 0        | 0        | 0        | 0.06042  | 0.087613 | 0.440517  |
| ENSMUSG Rnf182    | 0        | 0        | 0        | 0        | 0        | 0.015591  |
| ENSMUSG Foxo1     | 8.999101 | 8.394531 | 7.020881 | 6.50967  | 7.392263 | 6.382919  |
| ENSMUSG Tnip3     | 0.290453 | 0.3037   | 0.267882 | 1.638569 | 2.955302 | 2.392271  |
| Mus_musc Mus_musc | 0.236338 | 0.035167 | 0.602477 | 0        | 0        | 0.21446   |
| Mus_musc Mus_musc | 0        | 0        | 0.44015  | 0        | 0        | 0.131482  |
| Mus_musc Mus_musc | 0.107193 | 0.094818 | 0.024742 | 0.735398 | 0.210333 | 0.682734  |
| ENSMUSG Tmco6     | 5.556884 | 5.199508 | 5.400486 | 6.377448 | 6.653531 | 5.484219  |
| ENSMUSG Dsg4      | 0        | 0        | 0        | 0        | 0        | 0         |
| ENSMUSG Rbp3      | 0        | 0        | 0        | 0        | 0        | 0         |
| ENSMUSG Serpina3a | 0        | 0        | 0        | 0        | 0        | 0         |
| ENSMUSG Ago1      | 20.44911 | 20.04091 | 17.98108 | 17.55198 | 18.05455 | 16.988859 |
| ENSMUSG H2-Ob     | 2.229603 | 1.630937 | 2.280976 | 5.703747 | 4.448167 | 5.435585  |
| Mus_musc Mus_musc | 0        | 0        | 0        | 0.0571   | 0        | 0         |
| Mus_musc Mus_musc | 0.23261  | 0.167765 | 0.188115 | 0        | 0.260648 | 0.61173   |
| Mus_musc Mus_musc | 0        | 0        | 0        | 0        | 0        | 0.506935  |
| Mus_musc Mus_musc | 0        | 0.154394 | 0        | 0        | 0        | 0         |
| Mus_musc Mus_musc | 0.273674 | 0.502071 | 0.352731 | 0.66819  | 0.355537 | 0.729542  |
| Mus_musc Mus_musc | 0        | 0        | 0.222551 | 0        | 0.083285 | 0         |
| ENSMUSG Phc1      | 6.907185 | 7.599207 | 7.192983 | 5.261159 | 5.822272 | 5.685993  |
| ENSMUSG Clcf1     | 4.618093 | 4.693541 | 6.09091  | 3.651118 | 4.48091  | 3.573279  |
| ENSMUSG Cyp2b9    | 0.361795 | 0.048955 | 0        | 0        | 0        | 0         |
| ENSMUSG Rad54l2   | 5.729006 | 5.437947 | 5.051146 | 4.787184 | 4.981091 | 5.028374  |
| ENSMUSG Sh3bgr    | 2.659166 | 2.970545 | 1.414565 | 3.233615 | 2.793671 | 2.170546  |
| ENSMUSG Nup88     | 20.61617 | 17.77139 | 19.10687 | 17.91552 | 19.25427 | 20.411111 |
| ENSMUSG Lrp2      | 4.320007 | 4.393945 | 3.484239 | 4.243319 | 5.11022  | 5.982867  |
| ENSMUSG P2rx3     | 0.050328 | 0.067988 | 0.073187 | 0.078749 | 0.06017  | 0         |
| ENSMUSG Prg3      | 0        | 0        | 0        | 0.135509 | 0.115478 | 0.099177  |
| ENSMUSG Prg2      | 0.043979 | 0.149706 | 0.283845 | 5.896826 | 9.27817  | 9.093263  |
| ENSMUSG Slc43a3   | 178.3514 | 177.4047 | 218.3169 | 131.8045 | 133.9283 | 112.36562 |
| ENSMUSG Slc43a1   | 1.731683 | 2.10117  | 1.582013 | 0.877455 | 0.514153 | 0.912884  |
| ENSMUSG Timm10    | 6.246186 | 7.479079 | 6.60385  | 8.373455 | 7.456059 | 7.729282  |
| ENSMUSG Gimap9    | 11.43693 | 10.43315 | 13.54995 | 12.65515 | 11.2074  | 10.007617 |
| ENSMUSG Ube2l6    | 35.27564 | 33.8515  | 56.49129 | 25.88922 | 22.204   | 21.752928 |
| ENSMUSG Clp1      | 6.357777 | 6.794367 | 7.024059 | 7.874529 | 6.639153 | 6.333224  |
| Mus_musc Mus_musc | 0        | 0.308619 | 0        | 0        | 0        | 0         |
| ENSMUSG Bcl11a    | 0.774248 | 0.474016 | 0.587701 | 1.065364 | 1.12521  | 1.203182  |
| Mus_musc Mus_musc | 0.379701 | 0.488415 | 0.328532 | 0.485129 | 0.470666 | 0.576998  |
| Mus_musc Mus_musc | 0        | 0        | 0        | 0        | 0        | 0         |
| Mus_musc Mus_musc | 0        | 0        | 0        | 0        | 0.071677 | 0.184186  |

|                   |          |          |          |          |          |           |
|-------------------|----------|----------|----------|----------|----------|-----------|
| ENSMUSG Ii4       | 0.267533 | 0.249512 | 0.418292 | 0.751848 | 0.584423 | 1.247988  |
| ENSMUSG Oas1h     | 0        | 0        | 0        | 0        | 0        | 0         |
| ENSMUSG Cyp4a30b  | 0        | 0        | 0        | 0        | 0        | 0         |
| ENSMUSG Iqca      | 2.346015 | 3.006883 | 1.50677  | 3.084186 | 2.541529 | 2.748993  |
| ENSMUSG Mlph      | 6.038749 | 5.904145 | 4.171585 | 10.08151 | 10.30316 | 11.621229 |
| ENSMUSG Lrrfip1   | 49.63125 | 49.69436 | 50.81711 | 41.98367 | 42.41236 | 46.818833 |
| ENSMUSG Rab17     | 0.401223 | 0.28342  | 0.490939 | 0.661743 | 0.372875 | 0.373503  |
| ENSMUSG Ces1c     | 0.030344 | 0        | 0        | 0.071396 | 0.045958 | 0         |
| ENSMUSG Ilkap     | 23.75536 | 24.26066 | 27.6011  | 20.50474 | 22.57947 | 19.102377 |
| ENSMUSG Kih130    | 0.047114 | 0.145867 | 0.225813 | 0.314288 | 0.061647 | 0.03196   |
| Mus_musc Mus_musc | 0.642001 | 0.783855 | 0.138118 | 0.378492 | 0.180074 | 0.159021  |
| Mus_musc Mus_musc | 0.574163 | 0.503845 | 0.67193  | 0.351288 | 0.382418 | 0.622193  |
| Mus_musc Mus_musc | 0.260996 | 0        | 0.225683 | 0        | 0        | 0.094404  |
| Mus_musc Mus_musc | 6.809874 | 7.176357 | 8.294727 | 7.945399 | 5.963868 | 6.438564  |
| ENSMUSG Zfp53     | 3.481823 | 3.757012 | 3.373295 | 4.322836 | 3.011538 | 3.543302  |
| ENSMUSG Hipk2     | 20.19074 | 22.05578 | 13.26345 | 19.14141 | 19.8697  | 18.794749 |
| ENSMUSG Cdc20     | 2.40333  | 3.323802 | 2.817173 | 7.242925 | 8.519648 | 10.845929 |
| Mus_musc Mus_musc | 0.29304  | 0.06948  | 0.139159 | 0        | 0.093509 | 0.130505  |
| Mus_musc Mus_musc | 0        | 0        | 0        | 0        | 0        | 0.184186  |
| Mus_musc Mus_musc | 0.370234 | 0.283718 | 0.344318 | 2.479031 | 2.943892 | 2.204901  |
| Mus_musc Mus_musc | 0.464573 | 0.528479 | 0.552928 | 0.369682 | 0.94336  | 0.216665  |
| Mus_musc Mus_musc | 0.474343 | 0.470246 | 2.472929 | 0.850173 | 1.055779 | 1.169677  |
| Mus_musc Mus_musc | 0.12433  | 0        | 0.216599 | 0.264057 | 0        | 0.566059  |
| Mus_musc Mus_musc | 0        | 0        | 0.154858 | 0.233416 | 0.041299 | 0         |
| Mus_musc Mus_musc | 0.174214 | 0.046823 | 0.732598 | 0.240085 | 0.156563 | 0.156877  |
| ENSMUSG Cyth2     | 24.47417 | 21.9949  | 22.19981 | 17.00621 | 19.38476 | 18.716933 |
| ENSMUSG Gm20806   | 0        | 0        | 0        | 0        | 0        | 0         |
| ENSMUSG Vmn1r95   | 0        | 0        | 0        | 0        | 0        | 0         |
| ENSMUSG Olfr799   | 0        | 0        | 0        | 0        | 0        | 0         |
| ENSMUSG Gm5416    | 0        | 0        | 0        | 0        | 0        | 0         |
| ENSMUSG Csn1s2b   | 0        | 0        | 0        | 0        | 0        | 0         |
| ENSMUSG Rnf138rt1 | 0.086201 | 0.111942 | 0.032624 | 0.124339 | 0.092171 | 0.035724  |
| ENSMUSG Olfr1490  | 0        | 0        | 0        | 0        | 0        | 0         |
| ENSMUSG Fut10     | 2.172979 | 2.459741 | 2.113698 | 1.744731 | 1.88292  | 2.005105  |
| Mus_musc Mus_musc | 0.206466 | 0.286178 | 0.370721 | 0        | 0.22879  | 0         |
| ENSMUSG Olfr918   | 0        | 0        | 0        | 0        | 0        | 0         |
| Mus_musc Mus_musc | 2.588062 | 3.11621  | 2.213243 | 2.170129 | 2.331056 | 2.338902  |
| ENSMUSG Tmem229l  | 8.98786  | 9.177763 | 10.46413 | 11.38346 | 9.206009 | 10.919837 |
| Mus_musc Mus_musc | 0.064463 | 0.146181 | 0.211355 | 0.117363 | 0.135985 | 0         |
| ENSMUSG Gm11756   | 0        | 0        | 0        | 0        | 0        | 0         |
| ENSMUSG Chrm3     | 1.35462  | 0.991194 | 0.958654 | 0.618135 | 0.487678 | 0.503388  |
| ENSMUSG Gm8165    | 0.080447 | 0        | 0        | 0        | 0        | 0         |
| Mus_musc Mus_musc | 16.08168 | 15.26764 | 11.98106 | 13.37117 | 18.64162 | 13.840881 |
| ENSMUSG Pbld2     | 1.802409 | 1.926739 | 1.280845 | 4.600925 | 4.463737 | 5.978309  |
| ENSMUSG P2ry14    | 6.046591 | 5.677123 | 5.722935 | 9.572289 | 11.72658 | 11.640314 |
| ENSMUSG Lactbl1   | 0        | 0        | 0        | 0        | 0        | 0         |
| ENSMUSG Dbf4      | 3.111867 | 3.127581 | 3.153801 | 3.843722 | 4.166215 | 4.47605   |
| ENSMUSG Vdac3     | 41.46382 | 42.56189 | 45.20243 | 41.24616 | 41.58453 | 43.569889 |
| ENSMUSG Vrk2      | 3.844009 | 4.715256 | 3.887241 | 5.461537 | 5.25843  | 5.296999  |
| Mus_musc Mus_musc | 0.675149 | 1.289581 | 0.882044 | 1.150627 | 0.789624 | 1.209548  |
| ENSMUSG Zbtb8os   | 3.411007 | 3.130484 | 3.518522 | 4.11924  | 4.28691  | 3.3471    |
| ENSMUSG Mtif3     | 6.185601 | 7.850677 | 7.025911 | 5.426681 | 5.833439 | 6.269127  |
| ENSMUSG Olfr585   | 0        | 0        | 0        | 0        | 0        | 0         |
| ENSMUSG Gm44965   | 0        | 0        | 0        | 0        | 0        | 0         |
| ENSMUSG Slx       | 0        | 0        | 0        | 0        | 0        | 0         |
| ENSMUSG E030018B1 | 0        | 0        | 0        | 0.086751 | 0        | 0.107064  |
| ENSMUSG Defa20    | 0        | 0        | 0        | 0        | 0        | 0         |
| ENSMUSG Vmn1r135  | 0        | 0        | 0        | 0        | 0        | 0         |
| Mus_musc Mus_musc | 0        | 0        | 0        | 0        | 0        | 0.464851  |
| Mus_musc Mus_musc | 0        | 0.217653 | 0        | 0        | 0.278925 | 0         |
| ENSMUSG Ech1      | 71.13785 | 76.6228  | 65.6272  | 66.93451 | 67.1448  | 65.635071 |
| ENSMUSG Slc39a8   | 98.72974 | 93.85693 | 92.31144 | 85.72253 | 83.38722 | 89.84023  |
| ENSMUSG 4933409G1 | 0        | 0        | 0        | 0        | 0        | 0         |
| Mus_musc Mus_musc | 0        | 0.043778 | 0        | 0.135502 | 0        | 0.217169  |

|                    |          |          |          |          |          |           |
|--------------------|----------|----------|----------|----------|----------|-----------|
| ENSMUSG Lce3a      | 0        | 0        | 0        | 0        | 0        | 0         |
| ENSMUSG Lrrc36     | 2.32436  | 2.446581 | 1.899183 | 2.72608  | 2.643361 | 2.880238  |
| ENSMUSG Taf4b      | 1.206305 | 1.283406 | 1.308679 | 1.184879 | 1.173227 | 1.258881  |
| ENSMUSG Apip       | 13.29939 | 13.58854 | 13.6092  | 11.99784 | 13.8086  | 12.750538 |
| ENSMUSG Pdhx       | 7.369234 | 7.463963 | 6.840782 | 6.805878 | 6.475334 | 7.057438  |
| Mus_musc Mus_musc  | 13.74646 | 15.13617 | 13.19359 | 12.26762 | 12.56812 | 12.448062 |
| ENSMUSG Nsa2       | 30.08959 | 29.45015 | 30.13841 | 36.5409  | 35.29937 | 34.184738 |
| ENSMUSG Plin4      | 1.873039 | 3.162222 | 1.514005 | 1.311879 | 1.39506  | 1.127235  |
| ENSMUSG Hdgf12     | 19.58036 | 16.77266 | 19.55577 | 16.07011 | 16.1147  | 16.273633 |
| ENSMUSG 7530416G   | 0        | 0        | 0        | 0        | 0        | 0         |
| ENSMUSG Tpbgl      | 2.110035 | 2.007195 | 1.424442 | 1.736649 | 1.27188  | 1.803831  |
| ENSMUSG Vmn1r142   | 0        | 0        | 0        | 0        | 0        | 0         |
| ENSMUSG Dnah7c     | 0.254676 | 0.390812 | 0.264243 | 0.430286 | 0.505463 | 0.44916   |
| ENSMUSG Spag1      | 1.398745 | 1.590786 | 1.530004 | 1.454533 | 1.590891 | 1.015921  |
| ENSMUSG Kcnmb2     | 1.640311 | 2.23939  | 1.510815 | 2.976362 | 2.241962 | 3.183573  |
| ENSMUSG Tnfrsf23   | 1.244254 | 0.895246 | 1.145937 | 1.65963  | 2.410191 | 1.824701  |
| ENSMUSG Olfr1153   | 0        | 0        | 0        | 0        | 0        | 0         |
| ENSMUSG Slc6a5     | 0        | 0        | 0        | 0        | 0        | 0         |
| ENSMUSG Trp53rka   | 7.24116  | 7.434711 | 8.621135 | 6.724104 | 6.42882  | 7.309499  |
| ENSMUSG Nim1k      | 0.583846 | 0.808854 | 0.568116 | 0.459364 | 0.670418 | 0.676726  |
| ENSMUSG Got1l1     | 0.219093 | 0.136102 | 0.136544 | 0.434912 | 0.48931  | 0.202795  |
| ENSMUSG BC005561   | 1.650498 | 2.029671 | 1.124024 | 1.984408 | 1.54331  | 1.390744  |
| ENSMUSG Gm11042    | 0        | 0        | 0        | 0        | 0        | 0         |
| ENSMUSG Lcn9       | 0        | 0        | 0        | 0        | 0        | 0         |
| ENSMUSG Capza2     | 59.27511 | 59.26929 | 61.8426  | 64.59501 | 62.81382 | 61.680605 |
| ENSMUSG Epb42      | 0.082341 | 0.133615 | 0.138073 | 0        | 0.054168 | 0.026856  |
| ENSMUSG Usp46      | 19.68895 | 19.11636 | 17.31507 | 13.49997 | 13.19754 | 13.896774 |
| ENSMUSG Enox2      | 5.441517 | 4.991424 | 4.885236 | 4.625913 | 4.694589 | 5.433114  |
| ENSMUSG Tex36      | 0        | 0        | 0        | 0        | 0        | 0         |
| ENSMUSG Tox        | 0.475277 | 0.320111 | 0.592321 | 0.786082 | 0.574453 | 0.764784  |
| ENSMUSG Asb5       | 0.075569 | 0.188481 | 0        | 0.103422 | 0.079977 | 0.105399  |
| ENSMUSG Nsun3      | 2.512842 | 1.98629  | 2.003036 | 2.739974 | 2.411678 | 2.930504  |
| ENSMUSG Ttc1       | 18.9248  | 19.77976 | 17.86113 | 16.90753 | 16.14035 | 15.605987 |
| ENSMUSG Leprotl1   | 18.16316 | 16.4806  | 18.27779 | 16.61972 | 16.48067 | 16.426548 |
| ENSMUSG Dctn6      | 33.99219 | 33.53046 | 36.81992 | 28.9895  | 25.2838  | 28.369306 |
| ENSMUSG Gpm6a      | 40.32893 | 37.70003 | 31.44856 | 20.62995 | 15.49126 | 22.167488 |
| Mus_musc Mus_musc  | 0        | 0.297223 | 0        | 0        | 0        | 0         |
| Mus_musc Mus_musc  | 0        | 0        | 0        | 0.20005  | 0.080557 | 0         |
| Mus_musc Mus_musc  | 0        | 0.123781 | 0.265365 | 0.390043 | 0.196159 | 0.778446  |
| ENSMUSG Mplkip     | 4.1258   | 3.578621 | 3.972736 | 5.655878 | 5.390287 | 5.818049  |
| ENSMUSG Ear6       | 0.342794 | 0.185759 | 0.167423 | 0.211041 | 0.806564 | 0.945937  |
| ENSMUSG Syt11      | 2.034285 | 1.877079 | 2.172394 | 2.61078  | 3.144867 | 2.812951  |
| ENSMUSG Olfr569    | 0        | 0        | 0        | 0        | 0        | 0         |
| ENSMUSG Gm49333    | 0.185153 | 0        | 0        | 0        | 0.234714 | 0         |
| ENSMUSG Slc25a14   | 2.52037  | 2.547443 | 2.529415 | 2.482711 | 1.946332 | 1.874322  |
| ENSMUSG Olfr421-ps | 0        | 0        | 0        | 0        | 0        | 0         |
| ENSMUSG C2cd4b     | 8.586675 | 2.795707 | 3.933399 | 4.207598 | 4.194177 | 3.972288  |
| ENSMUSG Adap1      | 2.751201 | 2.593084 | 3.183162 | 5.316408 | 5.30456  | 7.00358   |
| ENSMUSG Gm9844     | 3.16358  | 1.427122 | 5.514223 | 4.616734 | 3.805904 | 4.154635  |
| ENSMUSG Mettl3     | 8.772913 | 8.313531 | 8.319889 | 8.94282  | 7.495552 | 7.551907  |
| ENSMUSG Crygn      | 0.18999  | 0        | 0.347331 | 0        | 0.188151 | 0.445596  |
| ENSMUSG Rbm24      | 1.13026  | 1.769956 | 0.597079 | 1.475049 | 1.238788 | 1.408732  |
| ENSMUSG Igip       | 9.104862 | 11.31587 | 9.698509 | 7.241994 | 6.89207  | 6.990239  |
| ENSMUSG Pml        | 9.139487 | 8.149527 | 10.01535 | 12.22546 | 10.99034 | 12.477936 |
| ENSMUSG Zdhhc9     | 14.28311 | 15.05053 | 14.47398 | 14.41058 | 16.27909 | 16.521212 |
| ENSMUSG Tfb1m      | 3.299729 | 3.809689 | 3.298352 | 3.679536 | 3.601884 | 3.37874   |
| ENSMUSG Taf6       | 11.7539  | 13.41668 | 13.27877 | 11.8979  | 12.78513 | 12.535648 |
| ENSMUSG Trim3      | 38.97781 | 39.85929 | 38.77684 | 32.57347 | 32.36975 | 32.572398 |
| ENSMUSG Alms1      | 1.222356 | 1.422172 | 1.153131 | 1.451796 | 1.558874 | 1.404604  |
| ENSMUSG Npbwr1     | 0.015279 | 0        | 0        | 0.008296 | 0.03034  | 0         |
| ENSMUSG Ahnak2     | 6.220651 | 6.106077 | 5.37784  | 8.359523 | 7.326442 | 11.309235 |
| ENSMUSG E330014E1  | 0        | 0        | 0        | 0        | 0        | 0         |
| ENSMUSG Gm7982     | 0        | 0        | 0        | 0        | 0        | 0         |
| ENSMUSG Btdb35f24  | 0        | 0        | 0        | 0        | 0        | 0         |

|                   |          |          |          |          |          |           |          |
|-------------------|----------|----------|----------|----------|----------|-----------|----------|
| ENSMUSG Wnt8a     |          | 0        | 0        | 0        | 0        | 0         | 0.063294 |
| Mus_musc Mus_musc | 1.357499 | 1.236627 | 1.665722 | 0.830757 | 0.849954 | 0.376893  |          |
| Mus_musc Mus_musc | 0        | 0.476628 | 0        | 0        | 0        | 0.064551  |          |
| ENSMUSG K230010J2 | 0.687821 | 0.49163  | 0.473094 | 0.419105 | 0.888581 | 0.556629  |          |
| Mus_musc Mus_musc | 0.193966 | 0.331528 | 0.265124 | 0.302842 | 0.35958  | 0.111774  |          |
| Mus_musc Mus_musc | 0        | 0        | 0        | 0.161298 | 0.125138 | 0.29274   |          |
| Mus_musc Mus_musc | 0.283192 | 0.239285 | 0.123636 | 0.329693 | 0.384957 | 0.744728  |          |
| ENSMUSG Gltp      | 61.46435 | 61.06828 | 59.36156 | 53.44213 | 60.34544 | 58.237633 |          |
| Mus_musc Mus_musc | 0.278892 | 0.255332 | 0.046293 | 0.126821 | 0.155402 | 0.173243  |          |
| ENSMUSG Card14    | 0.365815 | 0.389387 | 0.416014 | 0.159073 | 0.261811 | 0.243006  |          |
| ENSMUSG Nme5      | 7.761393 | 9.740199 | 5.550138 | 11.16786 | 10.58981 | 9.665393  |          |
| ENSMUSG Tcp11     | 2.104057 | 3.21065  | 1.451708 | 2.825099 | 3.485599 | 2.747693  |          |
| ENSMUSG Eif4e     | 12.50876 | 11.54747 | 11.66449 | 12.20079 | 10.91849 | 14.203031 |          |
| ENSMUSG Fsd1      | 0.036251 | 0.039195 | 0.198413 | 0.059631 | 0        | 0         |          |
| ENSMUSG Tspan5    | 5.634018 | 5.239488 | 5.809877 | 5.46825  | 4.615344 | 6.570067  |          |
| ENSMUSG Rorc      | 14.13023 | 15.92731 | 11.64064 | 9.877899 | 8.832289 | 7.988112  |          |
| ENSMUSG Mettl21e  | 1.194535 | 1.264606 | 1.360039 | 0.843255 | 1.303532 | 1.093244  |          |
| ENSMUSG Mttp      | 0.875553 | 1.262601 | 0.956755 | 1.37396  | 1.369965 | 1.331275  |          |
| ENSMUSG Dapp1     | 3.102214 | 3.437907 | 3.812598 | 5.710367 | 4.524761 | 5.113125  |          |
| ENSMUSG 2300002M  | 0        | 0        | 0        | 0.20751  | 0.08542  | 0         |          |
| ENSMUSG Hist1h2bh | 0.183552 | 0.336741 | 0.192481 | 0.557564 | 0.142104 | 0.188465  |          |
| ENSMUSG Prrc2b    | 39.83112 | 42.30231 | 33.4585  | 34.07437 | 33.51162 | 36.064523 |          |
| ENSMUSG Npep1     | 21.71479 | 21.83947 | 23.21099 | 22.59499 | 20.3601  | 24.0292   |          |
| ENSMUSG Gimap3    | 11.92362 | 7.462492 | 15.64941 | 16.35196 | 11.40395 | 14.343221 |          |
| ENSMUSG Drd5      | 0        | 0        | 0        | 0        | 0        | 0         |          |
| ENSMUSG Cma2      | 0        | 0        | 0        | 0        | 0.0422   | 0         |          |
| ENSMUSG Usf3      | 7.550279 | 7.623953 | 6.477878 | 6.641827 | 6.700334 | 6.355158  |          |
| ENSMUSG Diras1    | 0        | 0        | 0.017163 | 0        | 0        | 0         |          |
| ENSMUSG Gm26897   | 0        | 0        | 0.274294 | 0        | 0        | 0         |          |
| ENSMUSG Fut11     | 12.3865  | 10.82402 | 11.47114 | 9.15167  | 11.56183 | 8.903323  |          |
| ENSMUSG Kcns3     | 1.854479 | 2.713093 | 2.522328 | 1.599964 | 1.981708 | 1.38817   |          |
| ENSMUSG Dync1h1   | 41.62102 | 37.92101 | 38.25719 | 32.01103 | 35.58938 | 35.503498 |          |
| ENSMUSG Vmn1r14   | 0        | 0        | 0        | 0        | 0        | 0         |          |
| ENSMUSG Fastkd3   | 3.299328 | 2.957694 | 3.248384 | 2.555242 | 2.616109 | 2.69919   |          |
| ENSMUSG Gm5591    | 0        | 0        | 0        | 0        | 0        | 0         |          |
| ENSMUSG Cetn3     | 34.58151 | 37.11524 | 37.53659 | 32.87696 | 31.45282 | 29.304866 |          |
| ENSMUSG Adcy2     | 5.32563  | 5.442617 | 5.935271 | 3.613242 | 5.031272 | 3.721363  |          |
| ENSMUSG 1700001L1 | 1.605553 | 0.994222 | 1.203184 | 1.674072 | 1.597007 | 1.693333  |          |
| ENSMUSG Lect2     | 0        | 0        | 0.016832 | 0        | 0        | 0         |          |
| ENSMUSG Il9       | 0        | 0        | 0        | 0        | 0        | 0         |          |
| ENSMUSG Fam78b    | 2.484779 | 2.205418 | 2.215509 | 2.085503 | 2.688137 | 2.563218  |          |
| ENSMUSG Il3ra     | 8.694276 | 6.850127 | 9.192914 | 7.92025  | 6.826218 | 8.752154  |          |
| ENSMUSG Mapk11    | 6.31208  | 5.608806 | 5.951824 | 5.066798 | 5.221165 | 4.648903  |          |
| ENSMUSG Supt7l    | 5.04252  | 5.372206 | 5.360159 | 5.058572 | 4.940332 | 4.606312  |          |
| ENSMUSG Gm13283   | 0.133409 | 0.049573 | 0.159756 | 0.060186 | 0.095388 | 0.19709   |          |
| ENSMUSG Nepro     | 3.743322 | 3.956571 | 2.908439 | 3.212308 | 3.331783 | 3.91232   |          |
| ENSMUSG Sh3bp4    | 16.82016 | 16.47889 | 15.00214 | 10.48542 | 11.10833 | 10.775541 |          |
| ENSMUSG Rif1      | 5.705482 | 5.94159  | 4.839073 | 5.45105  | 5.009947 | 5.87935   |          |
| ENSMUSG Clic6     | 6.783742 | 9.161117 | 4.357163 | 10.31713 | 10.11127 | 10.484796 |          |
| ENSMUSG Setd4     | 1.389639 | 1.858503 | 0.989816 | 1.403504 | 1.475002 | 1.375778  |          |
| ENSMUSG Ripply3   | 46.97423 | 42.18927 | 52.67879 | 34.59892 | 31.60472 | 31.514376 |          |
| ENSMUSG Pigp      | 23.93832 | 18.1444  | 17.68987 | 15.46084 | 16.96457 | 14.860033 |          |
| ENSMUSG Cbr3      | 12.60639 | 9.140795 | 8.954699 | 11.80769 | 15.22796 | 15.715604 |          |
| ENSMUSG Dop1b     | 13.54251 | 13.42516 | 11.35716 | 11.88341 | 13.48746 | 9.174814  |          |
| ENSMUSG Chaf1b    | 2.69181  | 2.800969 | 1.524469 | 3.216022 | 2.5822   | 2.723401  |          |
| ENSMUSG Jag1      | 13.86672 | 12.65744 | 13.27839 | 8.517349 | 8.64109  | 8.530774  |          |
| ENSMUSG Ifi214    | 0.803288 | 0.735765 | 1.270016 | 1.412355 | 0.733998 | 0.907965  |          |
| ENSMUSG Mkks      | 6.316348 | 7.594575 | 6.709052 | 6.56829  | 6.857721 | 6.469201  |          |
| ENSMUSG Ubr1      | 16.57822 | 16.88088 | 14.23747 | 13.52666 | 13.7731  | 13.651177 |          |
| ENSMUSG Tmem263   | 5.021573 | 5.399331 | 5.776182 | 5.410131 | 5.77564  | 5.243807  |          |
| ENSMUSG Lamp5     | 0        | 0        | 0        | 0        | 0        | 0         |          |
| ENSMUSG Rgma      | 9.006557 | 8.301472 | 7.098048 | 5.66522  | 5.478253 | 5.000847  |          |
| ENSMUSG Plekhg2   | 10.75482 | 9.017919 | 11.39629 | 7.870305 | 7.700394 | 7.949092  |          |
| ENSMUSG Zdhhc18   | 21.6963  | 20.18478 | 25.04132 | 19.70363 | 20.01338 | 20.953238 |          |

|                   |          |          |          |          |          |           |
|-------------------|----------|----------|----------|----------|----------|-----------|
| ENSMUSG Mtfp1     | 3.460658 | 4.763027 | 4.256568 | 3.479707 | 3.703944 | 3.971296  |
| ENSMUSG Ahcyl1    | 30.46437 | 30.17918 | 29.27099 | 32.04238 | 31.07754 | 33.851998 |
| ENSMUSG Gstm4     | 3.51722  | 4.079523 | 4.345096 | 4.17073  | 4.232623 | 4.942255  |
| ENSMUSG Slc16a4   | 0.542468 | 0.71115  | 0.80257  | 0.680595 | 0.980448 | 1.007564  |
| ENSMUSG Slc6a17   | 0.245494 | 0.262853 | 0.174949 | 0.223287 | 0.273512 | 0.258857  |
| ENSMUSG Kcnc4     | 0.181468 | 0.029709 | 0.123788 | 0.098231 | 0.091335 | 0.0331    |
| ENSMUSG Hsd11b2   | 0.905004 | 0.526748 | 0.829256 | 0.819011 | 1.393496 | 1.586304  |
| ENSMUSG Tsnaxip1  | 1.346581 | 1.178928 | 1.124628 | 2.155466 | 1.652037 | 2.075088  |
| ENSMUSG Psmb10    | 43.91969 | 39.00641 | 74.61727 | 51.53022 | 41.48956 | 42.085503 |
| ENSMUSG Ctrl      | 0.383122 | 0.254022 | 0.931071 | 0.469982 | 0.154196 | 0.507508  |
| ENSMUSG Actn3     | 0.298245 | 0.071583 | 0.158085 | 0.207309 | 0.164328 | 0.256935  |
| ENSMUSG Rbm14     | 13.76681 | 14.13862 | 14.55292 | 11.47209 | 12.80933 | 13.621768 |
| ENSMUSG Rtl4      | 0        | 0        | 0        | 0        | 0        | 0         |
| ENSMUSG Mrpl34    | 16.91385 | 23.60347 | 21.77245 | 24.29231 | 22.7654  | 23.32308  |
| ENSMUSG Atp2c2    | 1.7034   | 2.232839 | 1.626653 | 4.748439 | 3.359651 | 3.863938  |
| ENSMUSG Tmed8     | 6.161589 | 6.038597 | 5.804436 | 5.766431 | 5.835616 | 6.100084  |
| ENSMUSG Kctd7     | 3.070887 | 3.177111 | 3.494006 | 3.112123 | 2.815223 | 2.72311   |
| ENSMUSG Ptgdr2    | 0.494361 | 0.349775 | 0.534811 | 0.479333 | 0.348191 | 0.346405  |
| ENSMUSG Vav1      | 6.976328 | 6.327071 | 9.644309 | 14.35988 | 14.19735 | 13.532951 |
| ENSMUSG Scn11a    | 0.009563 | 0        | 0        | 0.044957 | 0        | 0.016829  |
| ENSMUSG Tpst1     | 18.84106 | 15.98637 | 18.11358 | 14.91811 | 19.0016  | 15.352583 |
| ENSMUSG Gm7534    | 0        | 0        | 0        | 0        | 0        | 0         |
| Mus_musc Mus_musc | 0        | 0        | 0        | 0        | 0        | 0         |
| Mus_musc Mus_musc | 0.123633 | 0        | 0.568488 | 0.346627 | 0.504884 | 0.235366  |
| ENSMUSG Olfr1193  | 0        | 0        | 0        | 0        | 0        | 0         |
| ENSMUSG Cactin    | 17.66898 | 15.86581 | 17.41071 | 13.75385 | 12.85454 | 15.415775 |
| ENSMUSG P2ry10    | 4.009392 | 3.178452 | 3.377732 | 5.750723 | 5.142976 | 5.935933  |
| ENSMUSG Pex1      | 2.597119 | 2.524534 | 2.665309 | 2.986859 | 2.683408 | 2.738225  |
| ENSMUSG Ewsr1     | 59.58277 | 48.6956  | 57.95311 | 57.42117 | 56.0402  | 55.943707 |
| ENSMUSG Olfr609   | 0        | 0        | 0        | 0        | 0        | 0         |
| ENSMUSG Afm       | 0        | 0        | 0        | 0        | 0        | 0         |
| ENSMUSG Dck       | 3.925874 | 4.391748 | 5.151894 | 5.554835 | 5.978643 | 4.855683  |
| ENSMUSG Wsb2      | 39.68385 | 33.53    | 39.5633  | 37.29208 | 35.9     | 41.002905 |
| ENSMUSG Nf2       | 32.41878 | 31.53944 | 28.46713 | 24.79445 | 27.2335  | 25.512472 |
| ENSMUSG Rfc5      | 3.168541 | 3.038525 | 3.008956 | 4.440122 | 4.227289 | 4.478924  |
| ENSMUSG Zmat5     | 12.91687 | 13.3425  | 14.49532 | 12.61225 | 14.68352 | 14.092976 |
| ENSMUSG Nos1      | 0.014414 | 0.022774 | 0.010013 | 0.024926 | 0.005533 | 0.019323  |
| ENSMUSG Slc11a2   | 11.57745 | 13.64813 | 11.91339 | 12.61696 | 11.81921 | 12.903535 |
| ENSMUSG Lig4      | 2.415389 | 2.82308  | 2.472455 | 2.725803 | 2.795001 | 2.831955  |
| ENSMUSG Cela1     | 1.349263 | 0.408613 | 1.076194 | 0.810071 | 0.958092 | 0.922665  |
| ENSMUSG Prss46    | 0        | 0        | 0        | 2.053132 | 1.507105 | 1.425276  |
| Mus_musc Mus_musc | 0.188031 | 0        | 0        | 0.322308 | 0        | 0         |
| ENSMUSG Tigit     | 0.867113 | 0.423637 | 1.060309 | 4.483741 | 3.911601 | 3.26184   |
| Mus_musc Mus_musc | 0.064712 | 0.106292 | 0.26474  | 0        | 0.245831 | 0.027508  |
| ENSMUSG Olfr1260  | 0        | 0        | 0        | 0        | 0        | 0         |
| Mus_musc Mus_musc | 0        | 0.209198 | 0        | 0        | 0        | 0.268244  |
| Mus_musc Mus_musc | 0        | 0.154309 | 0        | 0        | 0        | 0         |
| ENSMUSG Nr4a1     | 98.38405 | 12.59873 | 30.95121 | 4.916543 | 4.233912 | 7.267565  |
| Mus_musc Mus_musc | 0.573678 | 0.374912 | 0.165861 | 0.169581 | 0.151234 | 0.062588  |
| Mus_musc Mus_musc | 0.156278 | 0.161974 | 0.451429 | 0.415449 | 0.058728 | 0         |
| ENSMUSG Cdc6      | 0.371442 | 0.559077 | 0.38496  | 0.764781 | 0.810659 | 1.082364  |
| Mus_musc Mus_musc | 1.124898 | 1.910209 | 1.926601 | 1.806661 | 1.444711 | 2.25418   |
| ENSMUSG Otud1     | 17.86544 | 14.211   | 14.40575 | 7.838284 | 8.910406 | 7.614072  |
| ENSMUSG Hfm1      | 0        | 0        | 0        | 0        | 0.025039 | 0         |
| ENSMUSG Usp48     | 17.14709 | 17.13482 | 17.2786  | 16.05818 | 16.21852 | 15.940576 |
| ENSMUSG Lrit2     | 0        | 0        | 0        | 0        | 0        | 0         |
| ENSMUSG Rnf227    | 0.92184  | 1.184634 | 0.709099 | 1.336273 | 1.402131 | 1.588431  |
| ENSMUSG Igl1      | 0        | 0        | 0        | 0.085208 | 0        | 0         |
| ENSMUSG Rc3h2     | 6.274725 | 7.145015 | 6.748092 | 5.74948  | 5.467782 | 5.572429  |
| ENSMUSG Olfr362   | 0        | 0        | 0        | 0        | 0        | 0         |
| ENSMUSG Phax      | 14.95949 | 15.56328 | 15.48018 | 13.00766 | 13.21621 | 12.560056 |
| ENSMUSG Olfr358   | 0        | 0        | 0        | 0        | 0        | 0         |
| ENSMUSG Tle1      | 39.21482 | 34.32061 | 28.7751  | 24.37711 | 28.19464 | 21.849836 |
| ENSMUSG 1700109H  | 0.278958 | 0.378678 | 0.354774 | 0.285824 | 0.30388  | 0.661832  |



|                   |          |          |          |          |          |           |
|-------------------|----------|----------|----------|----------|----------|-----------|
| Mus_musc Mus_musc | 0        | 0.08547  | 0.168991 | 0.548652 | 0.433333 | 0.329412  |
| Mus_musc Mus_musc | 0        | 0        | 0        | 0        | 0        | 0         |
| Mus_musc Mus_musc | 0        | 0.461005 | 0        | 0        | 0        | 0         |
| ENSMUSG Dnah2     | 0.88747  | 1.45089  | 0.64246  | 1.254464 | 1.373175 | 1.206     |
| ENSMUSG Zfp563    | 3.320848 | 3.38099  | 2.34781  | 2.163876 | 2.548359 | 2.14156   |
| Mus_musc Mus_musc | 0        | 0        | 0.235178 | 0        | 0        | 0         |
| Mus_musc Mus_musc | 0        | 0        | 0.051355 | 0        | 0.361486 | 0         |
| ENSMUSG B020031M  | 0        | 0        | 0        | 0        | 0        | 0         |
| ENSMUSG Prps113   | 14.11416 | 14.87633 | 13.64096 | 13.5653  | 13.59927 | 12.830328 |
| ENSMUSG Nkain1    | 2.039379 | 2.48242  | 3.05414  | 1.762619 | 1.57524  | 1.790773  |
| ENSMUSG Cep19     | 6.670509 | 6.457886 | 6.602155 | 6.87502  | 6.013313 | 6.39459   |
| ENSMUSG Spc25     | 1.157142 | 1.47786  | 1.23686  | 2.106573 | 2.896925 | 2.946665  |
| ENSMUSG Olfr1161  | 0        | 0        | 0        | 0        | 0        | 0         |
| ENSMUSG Olfr545   | 0        | 0        | 0        | 0        | 0        | 0         |
| ENSMUSG Tlr1      | 1.424247 | 1.2341   | 2.585755 | 4.092383 | 3.416818 | 3.742219  |
| ENSMUSG AY074887  | 0.065078 | 0        | 0.064889 | 0.047429 | 0        | 0         |
| Mus_musc Mus_musc | 0.288955 | 0.586597 | 0.132235 | 0.192311 | 0.089833 | 0.101745  |
| ENSMUSG Poldip2   | 20.68922 | 22.38763 | 20.16136 | 21.30059 | 18.90933 | 21.303383 |
| ENSMUSG Rps9      | 527.8698 | 537.2851 | 560.5939 | 647.7589 | 579.8646 | 632.96512 |
| ENSMUSG Sebox     | 0        | 0        | 0        | 0        | 0        | 0         |
| ENSMUSG lft20     | 36.52465 | 37.64105 | 43.00475 | 44.66247 | 44.61198 | 44.775032 |
| ENSMUSG Tfpt      | 9.287844 | 8.774342 | 7.979692 | 6.635753 | 8.231694 | 7.175174  |
| ENSMUSG Sprn      | 0.08352  | 0.118362 | 0.030042 | 0.187323 | 0.260783 | 0.06054   |
| ENSMUSG Inka1     | 7.01715  | 6.689949 | 4.654397 | 4.963451 | 4.45202  | 5.139949  |
| ENSMUSG Upf1      | 18.16729 | 16.44513 | 16.92109 | 14.05736 | 14.86299 | 15.96377  |
| ENSMUSG Tfrc      | 15.71222 | 19.17427 | 17.54153 | 19.81254 | 19.96623 | 23.439532 |
| ENSMUSG Tcf12     | 20.02116 | 20.70773 | 18.07028 | 16.60331 | 18.47966 | 17.147234 |
| ENSMUSG Vmn1r168  | 0        | 0        | 0        | 0        | 0        | 0         |
| ENSMUSG Mns1      | 2.675193 | 3.977087 | 2.218074 | 4.066111 | 3.554975 | 3.992188  |
| ENSMUSG Myo1e     | 15.69217 | 16.94897 | 13.97315 | 21.63345 | 22.7249  | 24.373733 |
| ENSMUSG 1700015F1 | 0        | 0        | 0        | 0        | 0        | 0         |
| ENSMUSG Gcnt3     | 0        | 0.028236 | 0        | 0.520916 | 0.436585 | 0.577525  |
| ENSMUSG Fam81a    | 1.401096 | 1.828354 | 1.248339 | 1.823199 | 1.412166 | 1.741189  |
| ENSMUSG Bbip1     | 5.528565 | 4.246342 | 4.487536 | 4.627732 | 4.090396 | 3.97512   |
| ENSMUSG Nxp4      | 0.026162 | 0.051319 | 0.040343 | 0.132773 | 0.033037 | 0.065321  |
| ENSMUSG Sema3d    | 3.195521 | 3.025558 | 2.770914 | 2.72342  | 2.441972 | 2.497448  |
| ENSMUSG Gbp7      | 16.62103 | 14.52252 | 85.09595 | 44.81782 | 11.96146 | 12.667198 |
| ENSMUSG Ints13    | 9.9877   | 11.11752 | 10.3068  | 11.13319 | 11.20148 | 11.54463  |
| ENSMUSG Scepe1    | 18.89268 | 21.48976 | 20.76171 | 41.86595 | 37.32229 | 44.283295 |
| ENSMUSG Uqcc2     | 17.65371 | 18.4929  | 18.90041 | 25.71116 | 18.60265 | 21.386733 |
| ENSMUSG 1700061G  | 0.098406 | 0.228784 | 0.16515  | 0.194232 | 0.207754 | 0.285465  |
| ENSMUSG Rfx2      | 5.059839 | 4.83509  | 4.144667 | 3.971072 | 3.95017  | 4.047084  |
| ENSMUSG Acsbg2    | 0        | 0        | 0        | 0        | 0        | 0         |
| ENSMUSG Zfp93     | 1.412187 | 1.887813 | 1.455894 | 1.776638 | 1.376471 | 1.392956  |
| ENSMUSG Trim25    | 24.13074 | 22.03717 | 22.91332 | 19.48765 | 21.62781 | 21.059268 |
| ENSMUSG Mrfap1    | 113.5151 | 109.9173 | 118.6701 | 105.9598 | 122.4002 | 121.10156 |
| ENSMUSG Adh7      | 1.251516 | 2.46643  | 0.823859 | 3.061888 | 2.051086 | 2.114654  |
| ENSMUSG Dgke      | 4.407383 | 3.956998 | 3.044483 | 2.996947 | 2.605658 | 2.795501  |
| ENSMUSG Tmem202   | 0.382051 | 0.438111 | 0.252463 | 0.78238  | 0.896896 | 0.746863  |
| ENSMUSG Olfr850   | 0        | 0        | 0        | 0        | 0        | 0         |
| ENSMUSG Vmn1r73   | 0        | 0        | 0        | 0        | 0        | 0         |
| ENSMUSG Apol8     | 0        | 0.038285 | 0        | 0.031312 | 0.019469 | 0.017294  |
| ENSMUSG Trem14    | 2.774393 | 2.496438 | 5.046928 | 2.772684 | 0.980921 | 0.856825  |
| ENSMUSG Olfr693   | 0        | 0        | 0        | 0        | 0        | 0         |
| ENSMUSG Mpped1    | 0        | 0        | 0        | 0        | 0        | 0         |
| ENSMUSG Btbd7     | 19.47971 | 21.57744 | 18.17574 | 16.08612 | 16.55448 | 15.035167 |
| ENSMUSG Zic5      | 0.008244 | 0.009711 | 0        | 0.031795 | 0.011749 | 0.076966  |
| ENSMUSG Lhfpl1    | 0        | 0.037523 | 0        | 0.057055 | 0.16333  | 0.048613  |
| ENSMUSG Tmem273   | 1.700205 | 1.224365 | 1.651965 | 2.414077 | 2.486269 | 2.862422  |
| ENSMUSG Hnrnpa3   | 12.20806 | 12.87401 | 10.36786 | 1.658775 | 1.374129 | 2.469968  |
| Mus_musc Mus_musc | 0.878325 | 0.490098 | 0.409818 | 0        | 0.226446 | 0         |
| Mus_musc Mus_musc | 0        | 0        | 0        | 0        | 0        | 0.518801  |
| Mus_musc Mus_musc | 0        | 0.070692 | 0        | 0.181453 | 0.13244  | 0.119957  |
| Mus_musc Mus_musc | 0.472215 | 0.21371  | 0.257244 | 0        | 0.481051 | 0.190204  |

|                   |          |          |          |          |          |           |
|-------------------|----------|----------|----------|----------|----------|-----------|
| Mus_musc Mus_musc | 0.683472 | 0.355415 | 0.440012 | 0.24822  | 0.293476 | 0.221837  |
| Mus_musc Mus_musc | 0        | 0        | 0        | 0        | 0        | 0         |
| ENSMUSG Ybey      | 1.540649 | 1.661893 | 1.984605 | 1.403738 | 1.694943 | 1.30144   |
| ENSMUSG Krt40     | 0        | 0        | 0        | 0        | 0        | 0         |
| ENSMUSG Igsf10    | 1.868339 | 1.578552 | 1.416159 | 1.792003 | 1.659458 | 1.53406   |
| ENSMUSG Tcf15     | 0.280512 | 0.316334 | 0        | 0.229772 | 0.178882 | 0.101115  |
| ENSMUSG Olfr1388  | 0.006805 | 0.010477 | 0        | 0        | 0.012922 | 0.01616   |
| ENSMUSG 2310034C  | 0        | 0        | 0        | 0        | 0        | 0         |
| ENSMUSG Fam160a2  | 4.511184 | 4.379094 | 6.755315 | 4.832924 | 4.344125 | 3.907676  |
| ENSMUSG Zfp46     | 8.673671 | 10.143   | 8.952854 | 7.879372 | 8.216688 | 9.111707  |
| ENSMUSG Ikbkg     | 11.30743 | 12.9453  | 8.989937 | 10.51263 | 8.546425 | 9.521558  |
| ENSMUSG Samd3     | 0.372169 | 0.619775 | 2.638621 | 1.058805 | 0.591037 | 0.741561  |
| ENSMUSG Commd1    | 4.089477 | 4.488716 | 4.261301 | 4.790066 | 4.573398 | 4.453031  |
| ENSMUSG Ncald     | 18.63879 | 16.32528 | 16.42803 | 13.69584 | 13.31501 | 14.100516 |
| Mus_musc Mus_musc | 0.174706 | 0.079071 | 0.070749 | 0.667206 | 0.834462 | 0.684858  |
| Mus_musc Mus_musc | 0.473826 | 0.22168  | 0.511093 | 0.255665 | 0.265157 | 0.348019  |
| Mus_musc Mus_musc | 0.065703 | 0        | 0.344579 | 0.086234 | 0.091804 | 0.375083  |
| Mus_musc Mus_musc | 1.377133 | 1.270308 | 1.632979 | 2.262735 | 1.372163 | 1.312857  |
| Mus_musc Mus_musc | 0        | 0.19682  | 0.21206  | 0.2717   | 0.070202 | 0         |
| Mus_musc Mus_musc | 0.218359 | 0.458048 | 0.38046  | 0.086546 | 0.097641 | 0.240518  |
| Mus_musc Mus_musc | 0        | 0        | 0        | 0        | 0        | 0         |
| ENSMUSG Igfl3     | 0        | 0        | 0        | 0        | 0        | 0         |
| ENSMUSG Tnfsf18   | 0        | 0.022487 | 0.11873  | 0.025521 | 0        | 0.1397    |
| ENSMUSG Olfr876   | 0        | 0        | 0        | 0        | 0        | 0         |
| ENSMUSG Armc7     | 3.609137 | 3.381396 | 4.30041  | 5.431458 | 4.070583 | 4.93417   |
| ENSMUSG Mef2c     | 10.67403 | 10.73548 | 7.158059 | 14.63924 | 13.79737 | 10.815949 |
| Mus_musc Mus_musc | 0.11073  | 0.126019 | 0        | 0.045438 | 0.225068 | 0.122279  |
| Mus_musc Mus_musc | 37.55456 | 39.25871 | 29.01102 | 22.25459 | 20.14953 | 25.554701 |
| Mus_musc Mus_musc | 0        | 0        | 0        | 0.366906 | 0        | 0         |
| Mus_musc Mus_musc | 0        | 0        | 0.445873 | 0        | 0        | 0         |
| Mus_musc Mus_musc | 0        | 0        | 0        | 0        | 0        | 0         |
| ENSMUSG Pom121l1  | 0        | 0        | 0        | 0        | 0        | 0         |
| ENSMUSG Gm20795   | 0        | 0        | 0        | 0        | 0        | 0         |
| ENSMUSG Tmtc2     | 6.438398 | 5.400413 | 5.521293 | 3.973188 | 3.636985 | 3.635838  |
| ENSMUSG Gm3285    | 0        | 0        | 0        | 0        | 0        | 0         |
| Mus_musc Mus_musc | 0.695387 | 1.348412 | 1.333863 | 1.664536 | 1.195071 | 1.140915  |
| ENSMUSG Rnmt      | 4.003183 | 3.631481 | 3.852379 | 4.225406 | 4.354881 | 4.255229  |
| Mus_musc Mus_musc | 0.219693 | 0.27071  | 0.207271 | 0.430929 | 0.595624 | 0.686619  |
| Mus_musc Mus_musc | 0        | 0        | 0        | 0        | 0        | 0.184186  |
| ENSMUSG Meioc     | 0.055185 | 0.047885 | 0.026044 | 0.054263 | 0.031636 | 0         |
| Mus_musc Mus_musc | 0        | 0        | 0.090897 | 0        | 0        | 0         |
| Mus_musc Mus_musc | 0.192999 | 0.288398 | 0        | 0.160756 | 0.220886 | 0         |
| Mus_musc Mus_musc | 0        | 0        | 0        | 0        | 0        | 0         |
| Mus_musc Mus_musc | 7.84649  | 6.821815 | 11.79926 | 13.75289 | 11.94718 | 10.963293 |
| ENSMUSG Cd46      | 0.747309 | 0.786761 | 0.99527  | 0.715271 | 0.511296 | 0.477139  |
| ENSMUSG Cd274     | 7.899396 | 6.837963 | 47.70021 | 22.4384  | 10.57046 | 12.103508 |
| ENSMUSG Cd34      | 63.86735 | 61.97523 | 62.92182 | 54.79667 | 54.47175 | 55.815242 |
| ENSMUSG Plgrkt    | 19.64248 | 16.28565 | 20.51721 | 22.29219 | 17.95109 | 19.044008 |
| ENSMUSG Pcd1lg2   | 0.097388 | 0.13461  | 0.313328 | 7.425148 | 8.278472 | 8.954978  |
| Mus_musc Mus_musc | 0        | 0        | 0        | 0        | 0        | 0         |
| Mus_musc Mus_musc | 0        | 0        | 0        | 0.194449 | 0        | 0         |
| Mus_musc Mus_musc | 0.547702 | 0.539072 | 0.551071 | 0.670999 | 0.384187 | 0.664491  |
| Mus_musc Mus_musc | 0.156117 | 0.275526 | 0.46722  | 0.508325 | 0.202437 | 0.506179  |
| Mus_musc Mus_musc | 0        | 0        | 0        | 0        | 0        | 0.171693  |
| Mus_musc Mus_musc | 0.113977 | 0.277892 | 0.279096 | 0.317189 | 0.506993 | 0.573942  |
| Mus_musc Mus_musc | 0        | 0        | 0        | 0        | 0        | 0.270346  |
| ENSMUSG Smim18    | 0        | 0        | 0        | 0        | 0        | 0         |
| ENSMUSG Gm21913   | 0        | 0        | 0        | 0        | 0        | 0         |
| ENSMUSG Gm5294    | 0        | 0        | 0        | 0        | 0.255519 | 0         |
| ENSMUSG Gdpgp1    | 2.086166 | 1.732471 | 1.606688 | 2.097541 | 1.550674 | 1.904079  |
| ENSMUSG Olfr1360  | 0        | 0        | 0        | 0        | 0        | 0         |
| ENSMUSG Ppox      | 6.966718 | 7.518909 | 7.523823 | 6.84615  | 5.669161 | 6.114754  |
| ENSMUSG Zfp948    | 4.296788 | 4.939875 | 5.108599 | 3.305027 | 3.068914 | 3.721507  |
| ENSMUSG Hdgfl1    | 0        | 0        | 0        | 0        | 0        | 0         |

|                   |          |          |          |          |          |           |
|-------------------|----------|----------|----------|----------|----------|-----------|
| ENSMUSG Ccdc9b    | 12.66004 | 10.60651 | 11.00287 | 7.504395 | 6.412682 | 6.257711  |
| ENSMUSG Adamtsl2  | 14.19321 | 15.88849 | 16.50271 | 14.05094 | 13.62973 | 15.342308 |
| ENSMUSG 5031439G  | 13.3283  | 13.39382 | 13.35356 | 18.85631 | 18.42673 | 21.553705 |
| ENSMUSG Adamts19  | 0.03381  | 0.047622 | 0        | 0.038078 | 0.020206 | 0.063119  |
| ENSMUSG lpo4      | 8.04073  | 5.803692 | 7.11145  | 7.993119 | 7.876239 | 8.834141  |
| ENSMUSG Olfr1289  | 0        | 0        | 0        | 0        | 0        | 0         |
| ENSMUSG 4930402H  | 14.49452 | 13.98299 | 13.31117 | 10.20056 | 10.7835  | 10.494014 |
| ENSMUSG Vmn1r205  | 0        | 0        | 0        | 0        | 0        | 0         |
| ENSMUSG Gm14190   | 0        | 0        | 0        | 0        | 0        | 0         |
| ENSMUSG E2f2      | 4.431098 | 4.683379 | 4.565055 | 5.058255 | 4.441418 | 4.844076  |
| ENSMUSG Slfn3     | 1.819064 | 2.109059 | 1.991787 | 1.760362 | 1.625355 | 2.077283  |
| ENSMUSG Rtel1     | 3.310107 | 3.568259 | 2.942723 | 2.701202 | 2.619732 | 3.370194  |
| ENSMUSG Pak1ip1   | 22.63136 | 20.63049 | 23.01191 | 18.00936 | 18.43717 | 19.663057 |
| ENSMUSG Defb7     | 0        | 0        | 0        | 0        | 0        | 0         |
| ENSMUSG Phf12     | 19.08129 | 17.50508 | 16.66033 | 14.8765  | 16.4109  | 16.248041 |
| ENSMUSG Gstt1     | 67.49166 | 80.77069 | 68.10999 | 68.80773 | 64.82834 | 72.610608 |
| ENSMUSG Gstt3     | 17.44359 | 18.24217 | 14.04527 | 18.98772 | 16.25639 | 19.692887 |
| ENSMUSG N4bp2     | 2.908918 | 3.037117 | 2.270045 | 3.163758 | 3.42169  | 3.194099  |
| ENSMUSG Adh4      | 0.096592 | 0.056369 | 0        | 0        | 0.041913 | 0         |
| ENSMUSG Mat1a     | 3.955037 | 3.329814 | 3.184629 | 2.252086 | 2.104773 | 2.463478  |
| ENSMUSG Phlda2    | 1.021381 | 0.798658 | 1.575101 | 1.321327 | 0.970455 | 0.758156  |
| ENSMUSG Klhdc2    | 15.97012 | 17.97209 | 14.97552 | 16.39947 | 16.95798 | 17.20602  |
| ENSMUSG Dnaaf2    | 3.16395  | 4.037942 | 3.800848 | 4.096426 | 4.288836 | 3.826401  |
| ENSMUSG Pole2     | 1.936793 | 2.113526 | 2.622026 | 2.619425 | 3.135416 | 3.268478  |
| ENSMUSG Olfr1036  | 0        | 0        | 0        | 0        | 0        | 0         |
| ENSMUSG Gm15127   | 0        | 0        | 0        | 0        | 0        | 0         |
| ENSMUSG Calml3    | 0.369579 | 0.717902 | 0.273793 | 1.557818 | 1.20726  | 0.777056  |
| ENSMUSG Olfr761   | 0        | 0        | 0        | 0        | 0        | 0         |
| ENSMUSG Gm49396   | 5.486222 | 6.923666 | 8.129417 | 5.516849 | 5.243824 | 6.86053   |
| ENSMUSG Gm3460    | 0        | 0        | 0        | 0        | 0        | 0         |
| ENSMUSG Gm13278   | 0        | 0        | 0        | 0        | 0        | 0         |
| ENSMUSG Ruvbl1    | 14.55286 | 14.67134 | 14.31683 | 14.56677 | 14.58688 | 14.895279 |
| ENSMUSG Gxylt2    | 0.512655 | 0.572222 | 0.303348 | 0.75176  | 0.863348 | 0.802911  |
| ENSMUSG Cntn3     | 0        | 0        | 0        | 0.009467 | 0        | 0.020875  |
| ENSMUSG Chl1      | 0.020166 | 0.157782 | 0.093189 | 0.345484 | 0.398136 | 0.397566  |
| ENSMUSG Gm9376    | 0        | 0        | 0        | 0        | 0        | 0         |
| ENSMUSG Eno4      | 2.908978 | 3.843333 | 2.270273 | 4.051969 | 3.239827 | 2.910297  |
| ENSMUSG Tmem229   | 0.032779 | 0.053621 | 0.061291 | 0.136021 | 0.159613 | 0.206794  |
| ENSMUSG Dhdh      | 4.068409 | 4.089095 | 3.232035 | 3.226955 | 3.503507 | 3.55049   |
| ENSMUSG Rgmb      | 10.50354 | 10.40309 | 10.00424 | 6.716131 | 6.998341 | 7.170254  |
| ENSMUSG Rps6ka3   | 16.29606 | 17.02314 | 15.00965 | 18.46841 | 18.89057 | 19.114434 |
| ENSMUSG Cd47      | 53.9524  | 54.36897 | 53.13003 | 41.47128 | 42.64136 | 37.669125 |
| ENSMUSG Map3k15   | 1.514889 | 1.15552  | 1.418064 | 0.891093 | 0.48065  | 0.885103  |
| ENSMUSG Nlgn3     | 0.129009 | 0.095964 | 0.120714 | 0.135656 | 0.12315  | 0.221416  |
| ENSMUSG Il2rg     | 29.80654 | 25.27364 | 43.55124 | 41.15405 | 35.07565 | 37.981554 |
| ENSMUSG Stk31     | 0        | 0        | 0        | 0        | 0        | 0         |
| ENSMUSG Ccr1      | 4.257024 | 3.786269 | 4.236165 | 12.66141 | 14.51436 | 13.892766 |
| ENSMUSG Itgb1     | 212.7538 | 202.5795 | 213.9784 | 173.2444 | 181.7267 | 178.16931 |
| ENSMUSG Ccdc7a    | 0        | 0        | 0        | 0        | 0        | 0.018474  |
| ENSMUSG Ryr2      | 0.371378 | 1.451244 | 0.374138 | 0.700002 | 0.527461 | 0.468496  |
| ENSMUSG Mtr       | 4.753225 | 4.990953 | 4.11025  | 4.427348 | 4.526605 | 4.441368  |
| ENSMUSG Dpysl5    | 4.69068  | 4.15825  | 4.27108  | 1.56762  | 2.11882  | 1.363532  |
| ENSMUSG Dhx15     | 47.93911 | 45.72329 | 48.76938 | 47.6973  | 45.90399 | 46.750947 |
| ENSMUSG Gm8773    | 0        | 0.032979 | 0        | 0.082068 | 0.04417  | 0.078003  |
| ENSMUSG Sumo1     | 50.96217 | 55.5714  | 55.67546 | 47.08082 | 44.73599 | 43.774704 |
| ENSMUSG Agbl5     | 5.101018 | 4.267885 | 4.193306 | 5.313218 | 4.335823 | 5.25499   |
| ENSMUSG Sfrp4     | 0.334342 | 0.311296 | 0.233023 | 0.304496 | 0.46036  | 0.293342  |
| ENSMUSG Ppargc1a  | 0.63833  | 0.778637 | 0.507775 | 0.663194 | 0.836171 | 0.81536   |
| ENSMUSG Cgref1    | 0.335249 | 0.399899 | 0.440851 | 1.531089 | 1.828989 | 2.7543    |
| ENSMUSG Khk       | 14.40666 | 14.31609 | 14.5342  | 13.20087 | 13.82225 | 13.03334  |
| ENSMUSG Emilin1   | 14.79022 | 13.72976 | 16.96201 | 19.75601 | 20.55054 | 21.223841 |
| Mus_musc Mus_musc | 2.090467 | 0.622474 | 0.648608 | 186.3426 | 32.04664 | 19.458309 |
| Mus_musc Mus_musc | 1.298292 | 1.339001 | 0.59933  | 53.62919 | 51.468   | 3.393317  |
| Mus_musc Mus_musc | 1.503835 | 1.13816  | 0.575357 | 9.054436 | 207.1046 | 2.077876  |

|                   |          |          |          |          |          |           |
|-------------------|----------|----------|----------|----------|----------|-----------|
| Mus_musc Mus_musc | 0.174016 | 0.135182 | 0.064519 | 0.377035 | 0.165479 | 0.958827  |
| Mus_musc Mus_musc | 1.466477 | 5.028829 | 0        | 87.95596 | 90.18976 | 127.64681 |
| Mus_musc Mus_musc | 0.742462 | 1.319919 | 0.42817  | 240.8816 | 293.4058 | 571.81942 |
| Mus_musc Mus_musc | 0        | 0.253998 | 0        | 37.40778 | 1.846375 | 32.751442 |
| Mus_musc Mus_musc | 0        | 0.059049 | 0        | 4.450465 | 15.73965 | 8.510467  |
| ENSMUSG Tnxb      | 18.05125 | 13.87773 | 14.02948 | 8.175161 | 7.605324 | 9.004447  |
| ENSMUSG Pck1      | 0.154043 | 0.521555 | 0        | 0.164272 | 0.127549 | 0         |
| ENSMUSG Hist1h2bb | 0.311635 | 0.418579 | 0.395144 | 0.172303 | 0.285184 | 0.238934  |
| ENSMUSG Ankrd60   | 0        | 0        | 0        | 0        | 0        | 0         |
| ENSMUSG Ccnt1     | 9.006807 | 9.140904 | 9.085868 | 7.75897  | 8.333332 | 9.208248  |
| ENSMUSG Atpaf2    | 7.657931 | 7.968269 | 8.072095 | 8.033703 | 8.099545 | 8.711341  |
| ENSMUSG Shcbp1l   | 0.112411 | 0.115832 | 0.073809 | 0.080755 | 0.023582 | 0.076509  |
| ENSMUSG Ssx2ip    | 12.8612  | 13.49649 | 10.48985 | 9.170287 | 9.835298 | 11.765129 |
| ENSMUSG Commd10   | 16.75909 | 16.24631 | 16.92598 | 16.84384 | 14.06485 | 14.777556 |
| ENSMUSG Igflr1    | 0.493433 | 0.830268 | 0.240717 | 0.663415 | 0.622112 | 0.104078  |
| ENSMUSG Amdhd2    | 8.903386 | 8.410411 | 8.30722  | 15.01516 | 14.83669 | 15.494835 |
| ENSMUSG Sipa1l1   | 18.68734 | 19.92482 | 19.18748 | 14.55477 | 12.66328 | 14.510199 |
| ENSMUSG Tspan1    | 15.45714 | 20.10446 | 11.43569 | 32.78093 | 33.9755  | 35.934299 |
| ENSMUSG Pik3r3    | 5.728717 | 6.902732 | 5.173344 | 5.821256 | 5.555243 | 6.165611  |
| ENSMUSG lpp       | 4.525048 | 5.265682 | 4.518294 | 5.710767 | 4.843473 | 4.702801  |
| ENSMUSG Prdx1     | 107.7446 | 102.0171 | 97.20684 | 118.5498 | 113.2114 | 117.00987 |
| ENSMUSG Mmachc    | 2.386821 | 2.831348 | 2.717417 | 3.111717 | 2.842582 | 3.051234  |
| ENSMUSG Nasp      | 10.7611  | 10.71569 | 11.04884 | 9.658106 | 11.29959 | 11.290708 |
| ENSMUSG Akr1a1    | 273.9206 | 265.6797 | 284.7024 | 287.9981 | 290.6845 | 310.57024 |
| ENSMUSG Slc38a2   | 39.32357 | 37.77782 | 37.64994 | 28.57455 | 30.06795 | 30.784199 |
| ENSMUSG Sreb2     | 41.18956 | 40.36907 | 39.96153 | 39.40299 | 36.55567 | 42.797539 |
| ENSMUSG Slc38a4   | 4.496644 | 4.796351 | 3.458374 | 1.285205 | 1.730571 | 1.378732  |
| ENSMUSG Rpap3     | 8.215219 | 7.810114 | 6.349388 | 7.612009 | 7.047246 | 6.04465   |
| ENSMUSG Endou     | 3.000499 | 2.628512 | 2.553099 | 2.438811 | 2.182136 | 2.352338  |
| ENSMUSG Rapgef3   | 26.64739 | 24.29136 | 26.02598 | 14.29788 | 15.70689 | 14.494627 |
| Mus_musc Mus_musc | 0        | 0.06023  | 0.143596 | 0.350839 | 0.098766 | 0         |
| ENSMUSG Mpv17l2   | 18.88618 | 16.94442 | 14.99841 | 19.7403  | 19.70842 | 18.67662  |
| ENSMUSG Afg1l     | 6.606465 | 6.864614 | 5.629683 | 4.709673 | 4.957302 | 5.470984  |
| ENSMUSG Igfbp1    | 0        | 0.016056 | 0        | 0        | 0.019556 | 0         |
| ENSMUSG Pth2      | 0        | 0        | 0        | 0        | 0        | 0         |
| ENSMUSG Snx10     | 8.636217 | 7.48023  | 9.817263 | 11.82827 | 10.93802 | 10.174021 |
| ENSMUSG Cd160     | 0.420842 | 0.108553 | 0.691295 | 0.292091 | 0.243912 | 0.371346  |
| ENSMUSG Krt17     | 0        | 0        | 0        | 0        | 0        | 0.071252  |
| ENSMUSG Ap3d1     | 32.74084 | 31.67885 | 33.46282 | 29.86846 | 31.8816  | 31.557483 |
| ENSMUSG Zpbp      | 0.102337 | 0.193322 | 0.108289 | 0.07861  | 0.120067 | 0.211025  |
| ENSMUSG Mknk2     | 85.75956 | 86.55928 | 80.63493 | 65.98235 | 63.95264 | 70.549268 |
| ENSMUSG Spata48   | 0.063904 | 0.097118 | 0        | 0.145541 | 0        | 0.110769  |
| ENSMUSG Cabin1    | 12.09519 | 11.42371 | 11.1402  | 10.76912 | 10.44803 | 11.948072 |
| ENSMUSG Tmeff1    | 26.35833 | 25.37536 | 30.94189 | 13.60049 | 15.43796 | 12.406674 |
| ENSMUSG Tex10     | 5.280005 | 4.411366 | 4.300362 | 5.726935 | 5.205776 | 5.288595  |
| ENSMUSG Invs      | 4.033876 | 4.38107  | 3.861276 | 3.676063 | 3.629749 | 3.89755   |
| ENSMUSG Erp44     | 24.51292 | 25.46159 | 24.11118 | 30.13197 | 32.65636 | 29.754381 |
| ENSMUSG Nr4a3     | 0.766653 | 0.674887 | 0.802358 | 0.654486 | 0.885091 | 1.103864  |
| ENSMUSG Cavin4    | 0.499647 | 0.878601 | 0.537651 | 0.321716 | 0.364295 | 0.19723   |
| ENSMUSG Hbb-y     | 0        | 0        | 0        | 0        | 0        | 0         |
| ENSMUSG Serpinb6c | 0.17202  | 0.154466 | 0        | 0        | 0.074959 | 0         |
| ENSMUSG Arl4c     | 21.06451 | 20.35454 | 18.06788 | 17.23517 | 17.23964 | 18.994133 |
| ENSMUSG Olfr849   | 0        | 0        | 0        | 0        | 0        | 0         |
| ENSMUSG Olfr250   | 0        | 0        | 0        | 0        | 0        | 0         |
| ENSMUSG Bcas1     | 1.80649  | 2.064011 | 1.258094 | 2.283078 | 1.80172  | 2.163502  |
| ENSMUSG Nxpe2     | 0        | 0.094667 | 0.035634 | 0.217856 | 0.067444 | 0.096088  |
| ENSMUSG Atp6v1a   | 39.75606 | 40.83618 | 36.96132 | 46.11269 | 46.59568 | 52.839933 |
| ENSMUSG Asna1     | 32.95619 | 29.06159 | 34.29449 | 33.22203 | 34.89034 | 37.463899 |
| ENSMUSG Ubash3b   | 1.520054 | 1.508255 | 1.833779 | 2.045162 | 2.245361 | 2.108036  |
| ENSMUSG Jhy       | 0.512163 | 0.912601 | 0.346665 | 1.261561 | 0.750717 | 0.895406  |
| ENSMUSG Clmp      | 1.723018 | 1.786778 | 2.231348 | 4.668316 | 4.31143  | 4.444657  |
| ENSMUSG Rexo2     | 37.07482 | 37.92868 | 41.36211 | 54.86885 | 57.29398 | 55.602764 |
| ENSMUSG Olfr1018  | 0        | 0        | 0        | 0        | 0        | 0         |
| ENSMUSG S1pr2     | 9.60576  | 7.589719 | 8.979584 | 8.364692 | 7.502042 | 8.649174  |

|                   |          |          |          |          |          |           |
|-------------------|----------|----------|----------|----------|----------|-----------|
| ENSMUSG Vmn2r2    | 0        | 0        | 0        | 0        | 0        | 0         |
| ENSMUSG H2-M10.1  | 0        | 0        | 0        | 0.068425 | 0.02826  | 0.108907  |
| ENSMUSG Rpp21     | 11.04645 | 10.35348 | 13.17802 | 12.49255 | 10.19339 | 12.276593 |
| ENSMUSG Pcdh12    | 20.81899 | 17.82118 | 15.40759 | 12.82316 | 11.7475  | 13.050549 |
| ENSMUSG Dele1     | 20.17482 | 19.85342 | 19.44175 | 14.02705 | 15.31615 | 14.637482 |
| ENSMUSG Cend1     | 0.409066 | 0.337468 | 0.698451 | 0.353254 | 0.474864 | 0.303507  |
| ENSMUSG Alyref2   | 1.943385 | 2.274516 | 1.870374 | 4.315683 | 2.065348 | 2.377348  |
| ENSMUSG Vmn1r228  | 0        | 0        | 0        | 0        | 0        | 0         |
| ENSMUSG Mlxipl    | 1.063695 | 0.651053 | 0.828068 | 0.484787 | 0.320532 | 0.47739   |
| ENSMUSG C5ar1     | 6.271144 | 5.401128 | 6.253232 | 2.348259 | 2.204807 | 2.187828  |
| ENSMUSG Fbxo11    | 26.31695 | 26.19195 | 23.90395 | 21.6697  | 21.21949 | 20.687349 |
| ENSMUSG Msh6      | 6.226187 | 6.556618 | 6.075974 | 6.064339 | 7.087566 | 7.419017  |
| ENSMUSG Pde6c     | 0        | 0        | 0.00782  | 0        | 0        | 0         |
| ENSMUSG Fam45a    | 16.09592 | 16.84248 | 14.76592 | 12.21503 | 13.15348 | 14.344005 |
| ENSMUSG Rbp4      | 15.07301 | 17.61698 | 11.38188 | 23.48855 | 21.76589 | 25.036598 |
| ENSMUSG Tbl2      | 4.430926 | 4.507273 | 4.501028 | 4.399806 | 4.938604 | 5.040431  |
| ENSMUSG Bud23     | 17.2778  | 16.70686 | 17.64302 | 16.98937 | 13.99373 | 19.76481  |
| ENSMUSG Plce1     | 8.995107 | 9.627299 | 6.998257 | 4.630641 | 3.875116 | 4.211123  |
| ENSMUSG Noc3l     | 3.726559 | 3.194438 | 2.881196 | 3.078428 | 2.69251  | 3.319752  |
| ENSMUSG Tex35     | 0        | 0        | 0        | 0.013356 | 0        | 0         |
| ENSMUSG Ralgps2   | 3.289669 | 3.01349  | 2.907514 | 5.827209 | 5.751142 | 6.105418  |
| ENSMUSG Abl2      | 6.339184 | 6.066607 | 5.089523 | 5.764861 | 5.743442 | 5.54262   |
| ENSMUSG Stx1a     | 2.140322 | 2.292279 | 2.49631  | 2.01432  | 1.534289 | 2.150152  |
| ENSMUSG Olfr959   | 0        | 0        | 0        | 0        | 0        | 0         |
| ENSMUSG Nrns2     | 0        | 0        | 0        | 0        | 0        | 0         |
| ENSMUSG Fxn       | 5.886876 | 5.065197 | 6.909162 | 5.652241 | 4.425995 | 5.189998  |
| ENSMUSG Ceacam9   | 0        | 0        | 0        | 0        | 0        | 0         |
| ENSMUSG Dhrr7c    | 0.090961 | 1.223959 | 0.43835  | 0.667952 | 0.397985 | 0.471271  |
| ENSMUSG Eif3l     | 39.97027 | 38.27538 | 39.25038 | 39.04022 | 41.57626 | 41.967247 |
| ENSMUSG Furin     | 34.33903 | 33.28753 | 35.87868 | 31.75783 | 32.841   | 33.759844 |
| ENSMUSG Unc45a    | 21.1057  | 19.97101 | 24.60404 | 17.32873 | 16.77929 | 18.961649 |
| ENSMUSG Hddc3     | 9.665159 | 10.34558 | 8.44107  | 8.998123 | 7.626354 | 8.508272  |
| ENSMUSG Vps33b    | 5.640604 | 5.217359 | 6.230069 | 6.637197 | 5.893448 | 5.845799  |
| ENSMUSG Iqgap1    | 94.92554 | 87.37319 | 78.04005 | 84.5731  | 91.09628 | 94.761481 |
| ENSMUSG Sema4b    | 4.213371 | 3.061648 | 3.983616 | 5.751632 | 5.210489 | 6.144719  |
| ENSMUSG Cib1      | 22.92717 | 24.22266 | 27.95524 | 32.27819 | 28.68874 | 30.389939 |
| ENSMUSG Gm10282   | 26.55097 | 27.10536 | 26.70744 | 28.20872 | 29.81017 | 30.95752  |
| Mus_musc Mus_musc | 0        | 0        | 0        | 0.39518  | 0        | 0.075535  |
| Mus_musc Mus_musc | 0        | 0        | 0        | 0.375615 | 0.105135 | 0         |
| ENSMUSG Gm10300   | 0.572473 | 0.644941 | 0.37859  | 0.44772  | 0.502357 | 0.452786  |
| ENSMUSG Pla2g4d   | 0        | 0        | 0        | 0        | 0        | 0         |
| Mus_musc Mus_musc | 1.547655 | 1.603675 | 1.660541 | 2.482075 | 1.992471 | 1.896727  |
| Mus_musc Mus_musc | 0.09334  | 0.045751 | 0        | 0.447143 | 0.452486 | 0.473858  |
| Mus_musc Mus_musc | 0.27737  | 0.421472 | 0.225248 | 0.722254 | 0.305813 | 0.409379  |
| Mus_musc Mus_musc | 0        | 0        | 0        | 0.174016 | 0        | 0         |
| ENSMUSG Zfp9      | 2.555247 | 2.261984 | 2.164665 | 2.327466 | 2.649168 | 2.225158  |
| ENSMUSG Slfn2     | 22.78503 | 17.58977 | 35.64807 | 34.1856  | 33.40682 | 33.71217  |
| ENSMUSG Gdf2      | 0.259393 | 0.20461  | 0.218746 | 0.122068 | 0.018744 | 0.141345  |
| ENSMUSG Gm5460    | 0        | 0        | 0        | 0        | 0        | 0         |
| Mus_musc Mus_musc | 0.297716 | 0.234613 | 0.049991 | 0.431785 | 0.200345 | 0.205487  |
| Mus_musc Mus_musc | 0.07096  | 0        | 0        | 0        | 0        | 0.322969  |
| Mus_musc Mus_musc | 0        | 0        | 0        | 0        | 0.0575   | 0.259225  |
| Mus_musc Mus_musc | 0        | 0.154309 | 0        | 0        | 0        | 0         |
| Mus_musc Mus_musc | 0        | 0.252277 | 0        | 0        | 0        | 0         |
| ENSMUSG Usp17lc   | 0        | 0        | 0        | 0        | 0        | 0         |
| ENSMUSG Kcnc1     | 0.024207 | 0.07276  | 0.155025 | 0.12768  | 0.064043 | 0.159267  |
| ENSMUSG Hdhd5     | 6.125943 | 6.604725 | 6.391754 | 6.892866 | 5.941087 | 6.257747  |
| Mus_musc Mus_musc | 0.423792 | 0.17242  | 0.24277  | 0.560779 | 0.204433 | 0.449322  |
| Mus_musc Mus_musc | 0.376063 | 0        | 0        | 0        | 0        | 0         |
| Mus_musc Mus_musc | 0.516052 | 0.420366 | 0.45194  | 0.109204 | 0.194074 | 0.225064  |
| Mus_musc Mus_musc | 1.395739 | 3.338818 | 3.495399 | 1.955619 | 2.782522 | 1.86978   |
| Mus_musc Mus_musc | 0        | 0.132265 | 0        | 0        | 0        | 0         |
| Mus_musc Mus_musc | 0        | 0        | 0        | 0.145381 | 0        | 0.134759  |
| Mus_musc Mus_musc | 5.621723 | 5.783803 | 5.183636 | 5.324468 | 5.125206 | 4.750865  |

|                   |          |          |          |          |          |           |
|-------------------|----------|----------|----------|----------|----------|-----------|
| Mus_musc Mus_musc | 0        | 0        | 0.257978 | 0.123445 | 0.398996 | 0         |
| Mus_musc Mus_musc | 0        | 0        | 0        | 0        | 0        | 0         |
| Mus_musc Mus_musc | 0        | 0        | 0        | 0        | 0.186692 | 0         |
| ENSMUSG Fstl5     | 0        | 0        | 0        | 0        | 0        | 0         |
| ENSMUSG F2rl1     | 4.65503  | 3.993688 | 4.578472 | 2.282462 | 2.218921 | 2.350676  |
| ENSMUSG 4933428G  | 0.244716 | 0.116021 | 0.254269 | 0.173732 | 0.170518 | 0.139793  |
| ENSMUSG Ino80c    | 11.46326 | 10.6026  | 10.72784 | 11.80512 | 10.13471 | 11.658162 |
| ENSMUSG 9230110F1 | 0        | 0        | 0        | 0        | 0        | 0         |
| ENSMUSG Palm3     | 0.35386  | 0.332847 | 0.29426  | 0.3442   | 0.461401 | 0.378213  |
| Mus_musc Mus_musc | 0        | 0        | 0        | 0        | 0        | 0         |
| Mus_musc Mus_musc | 0        | 0.11845  | 0.146395 | 0        | 0        | 0         |
| Mus_musc Mus_musc | 2.478784 | 1.950651 | 2.904609 | 1.699993 | 1.688055 | 1.091784  |
| Mus_musc Mus_musc | 0.621939 | 0.763046 | 0.141599 | 0.038319 | 0.086316 | 0.196925  |
| Mus_musc Mus_musc | 0.290836 | 0.534068 | 0.257719 | 0.749387 | 0.288335 | 0         |
| ENSMUSG Slc26a2   | 9.033053 | 8.576348 | 7.031032 | 6.485482 | 6.889244 | 8.053257  |
| ENSMUSG Exosc1    | 7.121272 | 7.373624 | 8.925652 | 6.137127 | 6.923155 | 5.923309  |
| ENSMUSG Tmem132c  | 1.588122 | 1.249081 | 1.731579 | 1.227637 | 1.190773 | 1.480181  |
| ENSMUSG Kctd9     | 8.355212 | 7.11643  | 6.940301 | 5.898206 | 5.720097 | 5.643891  |
| ENSMUSG Brip1     | 0.393914 | 0.198013 | 0.372583 | 0.546026 | 0.508616 | 0.569965  |
| ENSMUSG Rad21l    | 0        | 0        | 0        | 0        | 0        | 0         |
| Mus_musc Mus_musc | 0        | 0        | 0        | 0.120541 | 0        | 0         |
| Mus_musc Mus_musc | 0.647788 | 0.17148  | 0.147882 | 0.153103 | 0.154838 | 0.113682  |
| Mus_musc Mus_musc | 0.498604 | 0.930011 | 0.493463 | 0.84415  | 0.688114 | 0.425579  |
| ENSMUSG Cfp58     | 1.314618 | 1.976496 | 1.218891 | 1.700572 | 1.594364 | 1.882499  |
| Mus_musc Mus_musc | 0        | 0.067851 | 0.131671 | 0        | 0.102681 | 0.248922  |
| ENSMUSG Lrrc8e    | 3.655278 | 4.972672 | 3.470658 | 2.98432  | 3.451916 | 3.717242  |
| Mus_musc Mus_musc | 0        | 0.517346 | 0        | 0.349714 | 0        | 0.258928  |
| Mus_musc Mus_musc | 0.136003 | 0        | 0.151481 | 0        | 0.164303 | 0         |
| Mus_musc Mus_musc | 8.827159 | 7.719848 | 9.991018 | 10.67274 | 10.22365 | 10.670806 |
| Mus_musc Mus_musc | 0.063771 | 0.06461  | 0.175184 | 0.2861   | 0.642936 | 0.464257  |
| Mus_musc Mus_musc | 0        | 0        | 0        | 0.065176 | 0        | 0.300514  |
| Mus_musc Mus_musc | 12.59646 | 10.33731 | 11.21614 | 11.13291 | 8.827259 | 8.521585  |
| Mus_musc Mus_musc | 0.213491 | 0.065293 | 0.071482 | 0.142109 | 0.193275 | 0.210944  |
| Mus_musc Mus_musc | 0        | 0        | 0        | 0        | 0        | 0         |
| Mus_musc Mus_musc | 0.604214 | 0.819151 | 0.453392 | 253.1075 | 66.69985 | 31.877344 |
| Mus_musc Mus_musc | 0        | 0        | 0        | 0        | 0        | 0         |
| Mus_musc Mus_musc | 0.77076  | 0.903266 | 2.02457  | 115.5975 | 41.53415 | 52.075245 |
| Mus_musc Mus_musc | 0        | 0        | 0.056063 | 45.01606 | 124.1957 | 0.481274  |
| Mus_musc Mus_musc | 3.743376 | 3.211179 | 2.968    | 155.3654 | 147.722  | 289.41243 |
| Mus_musc Mus_musc | 0.642013 | 0.073773 | 0.216161 | 42.06146 | 37.85758 | 161.21658 |
| Mus_musc Mus_musc | 0.413837 | 0.412297 | 0.096158 | 25.67337 | 5.60281  | 7.223246  |
| ENSMUSG Gprin1    | 0.064565 | 0.062407 | 0        | 0.012289 | 0.047025 | 0.014633  |
| Mus_musc Mus_musc | 0        | 0        | 0.06651  | 1.045787 | 1.370692 | 0.187161  |
| ENSMUSG Cpt1c     | 1.003979 | 0.878764 | 1.294391 | 0.951513 | 1.173094 | 1.306645  |
| ENSMUSG Trim71    | 0.004493 | 0        | 0        | 0        | 0        | 0         |
| ENSMUSG Calhm1    | 0        | 0        | 0        | 0        | 0        | 0         |
| ENSMUSG Ttc34     | 0.945997 | 1.451607 | 0.60882  | 1.077619 | 1.249823 | 1.205909  |
| ENSMUSG Pkd1l1    | 0.007392 | 0        | 0        | 0.009874 | 0        | 0.028409  |
| Mus_musc Mus_musc | 0        | 0        | 0.383436 | 0.105442 | 0        | 0         |
| Mus_musc Mus_musc | 1.666556 | 0.169364 | 1.026138 | 0.659952 | 0.37724  | 0.564769  |
| Mus_musc Mus_musc | 0        | 0        | 0        | 0.348054 | 0        | 0.120126  |
| Mus_musc Mus_musc | 1.449718 | 1.359623 | 1.223346 | 1.189567 | 0.926357 | 0.820862  |
| Mus_musc Mus_musc | 0        | 0.154309 | 0        | 0        | 0        | 0         |
| Mus_musc Mus_musc | 0        | 0.689734 | 1.030466 | 0.336614 | 0        | 1.460921  |
| Mus_musc Mus_musc | 0        | 0.091039 | 0.077734 | 0        | 0        | 0         |
| Mus_musc Mus_musc | 0.156126 | 0        | 0        | 0        | 0        | 0         |
| Mus_musc Mus_musc | 0.279587 | 0.397713 | 0.419388 | 0.629629 | 0.505465 | 0.572363  |
| ENSMUSG Dhx57     | 6.782245 | 6.394551 | 6.064983 | 6.736385 | 5.589413 | 6.181955  |
| ENSMUSG Frs1l     | 0        | 0.013582 | 0.014844 | 0.013172 | 0.035903 | 0.012104  |
| ENSMUSG Mgat4d    | 0        | 0        | 0        | 0        | 0        | 0         |
| ENSMUSG Olfr610   | 0        | 0        | 0        | 0        | 0        | 0         |
| ENSMUSG BC049730  | 0        | 0        | 0        | 0        | 0        | 0         |
| ENSMUSG Olfr710   | 0        | 0        | 0        | 0        | 0        | 0         |
| ENSMUSG Dennd1c   | 4.013377 | 3.10526  | 4.802253 | 5.159451 | 4.138322 | 5.595691  |

|                    |          |          |          |          |          |           |
|--------------------|----------|----------|----------|----------|----------|-----------|
| ENSMUSG Clpp       | 19.81159 | 20.15235 | 22.98002 | 19.16886 | 18.96428 | 18.537792 |
| ENSMUSG Alkbh7     | 4.293655 | 5.9294   | 5.375766 | 8.597396 | 6.974319 | 8.007317  |
| ENSMUSG Pspn       | 0.28046  | 0.407585 | 0.376364 | 0.069386 | 0.852325 | 0.632217  |
| ENSMUSG Trim62     | 6.219262 | 5.962739 | 5.11276  | 4.881484 | 5.924003 | 5.020352  |
| ENSMUSG lqcf4      | 0        | 0        | 0        | 0        | 0        | 0         |
| ENSMUSG Ly6k       | 0.179949 | 0.343387 | 0.43706  | 0.232306 | 0.652335 | 0.953576  |
| ENSMUSG Fzd1       | 18.39375 | 17.67089 | 18.52043 | 12.92927 | 14.0251  | 14.356478 |
| ENSMUSG Zfp612     | 1.900976 | 2.081939 | 1.704161 | 1.214221 | 1.37372  | 1.524642  |
| ENSMUSG Pou1f1     | 0.026831 | 0.023064 | 0        | 0        | 0        | 0         |
| ENSMUSG Chmp2b     | 36.35528 | 33.85175 | 34.27914 | 35.43371 | 33.91266 | 34.291777 |
| ENSMUSG Plod3      | 29.38716 | 27.58493 | 33.88172 | 31.89365 | 32.59652 | 31.709418 |
| ENSMUSG Ap1s1      | 25.84081 | 26.81312 | 26.62804 | 29.44748 | 29.91213 | 29.153289 |
| ENSMUSG Rnd2       | 4.569407 | 5.36186  | 4.548673 | 3.511406 | 4.442582 | 4.994103  |
| Mus_musc Mus_musc  | 0        | 0        | 0        | 0        | 0        | 0.184186  |
| Mus_musc Mus_musc  | 0        | 0        | 0        | 0        | 0        | 0         |
| Mus_musc Mus_musc  | 0        | 0.154309 | 0        | 0        | 0        | 0         |
| ENSMUSG Gm5771     | 0        | 0        | 0        | 0        | 0        | 0         |
| ENSMUSG Olfr127    | 0        | 0        | 0        | 0        | 0        | 0         |
| ENSMUSG Arhgap40   | 2.791362 | 2.324314 | 2.176422 | 1.468646 | 0.759204 | 1.067246  |
| ENSMUSG Zcchc24    | 28.77298 | 27.45218 | 29.26756 | 18.94788 | 19.81955 | 18.2705   |
| ENSMUSG Cpsf6      | 14.079   | 15.81654 | 15.17728 | 14.56497 | 11.9162  | 15.025582 |
| ENSMUSG Plekho2    | 12.80366 | 11.94584 | 15.90446 | 22.3077  | 21.13699 | 25.444603 |
| ENSMUSG Olfr1134   | 0        | 0        | 0        | 0        | 0        | 0         |
| ENSMUSG Ufl1       | 11.24888 | 9.971306 | 9.695118 | 10.18218 | 9.87765  | 9.182526  |
| ENSMUSG Rasl10a    | 1.421978 | 0.9284   | 1.478557 | 1.634797 | 1.826923 | 1.811185  |
| ENSMUSG AL731706   | 0.306909 | 0.535343 | 0.795893 | 0.473157 | 0.427014 | 0.855798  |
| ENSMUSG Trim7      | 1.44321  | 1.706969 | 1.360269 | 2.550332 | 2.34661  | 2.507753  |
| ENSMUSG Ankib1     | 10.01975 | 11.36988 | 10.16917 | 8.769288 | 9.935347 | 9.475113  |
| ENSMUSG Skiv2l     | 14.59101 | 14.12592 | 15.00148 | 15.86765 | 15.05487 | 15.551659 |
| ENSMUSG Mars       | 12.98934 | 12.29625 | 14.28907 | 13.62405 | 13.64714 | 15.146521 |
| ENSMUSG Tdrkh      | 1.031136 | 1.386102 | 1.082187 | 0.86086  | 1.090788 | 0.68045   |
| ENSMUSG Dlx1       | 0        | 0.045043 | 0.008506 | 0        | 0.013624 | 0         |
| ENSMUSG Ammecer1l  | 14.10741 | 14.21431 | 12.34934 | 12.50088 | 12.57075 | 12.89245  |
| ENSMUSG Aldh1a3    | 0.34761  | 0.73847  | 0.385958 | 1.109599 | 1.925865 | 1.623867  |
| Mus_musc Mus_musc  | 3.506823 | 1.218364 | 1.888667 | 1.182951 | 2.088163 | 1.898621  |
| Mus_musc Mus_musc  | 0.13601  | 0        | 0.207319 | 0.161375 | 0.278163 | 0.347306  |
| Mus_musc Mus_musc  | 0.575836 | 0.358193 | 0.314175 | 0.553702 | 0.193281 | 0.336202  |
| Mus_musc Mus_musc  | 0        | 0        | 0.02012  | 0.19081  | 0.097755 | 0.083962  |
| Mus_musc Mus_musc  | 0        | 0        | 0        | 0        | 0        | 0         |
| Mus_musc Mus_musc  | 0        | 0.308619 | 0        | 0        | 0        | 0         |
| Mus_musc Mus_musc  | 0.188031 | 0        | 0        | 0        | 0        | 0         |
| ENSMUSG Gm7361     | 0        | 0        | 0        | 0.016908 | 0        | 0         |
| ENSMUSG C1qtnf1    | 11.56866 | 9.600885 | 7.771388 | 8.288669 | 9.892248 | 9.892678  |
| ENSMUSG Rnase11    | 0        | 0        | 0        | 0        | 0        | 0         |
| ENSMUSG Rab22a     | 14.33837 | 15.02825 | 13.52416 | 11.38722 | 11.25856 | 11.611357 |
| ENSMUSG Skint11    | 0        | 0        | 0        | 0        | 0        | 0         |
| ENSMUSG Trmt2b     | 6.683007 | 5.773011 | 5.722931 | 6.066741 | 5.371563 | 6.698199  |
| Mus_musc Mus_musc  | 0.356039 | 0.572323 | 0.778997 | 0.338946 | 0.292572 | 0.386702  |
| ENSMUSG Tmem128    | 13.88472 | 15.59058 | 16.61262 | 13.52072 | 13.64808 | 12.600737 |
| Mus_musc Mus_musc  | 0        | 0.154309 | 0        | 0        | 0        | 0         |
| ENSMUSG Pramel3    | 0        | 0        | 0        | 0.004765 | 0.016322 | 0.010584  |
| Mus_musc Mus_musc  | 0.252786 | 0.65458  | 0.032931 | 0.351077 | 0.350346 | 0.525224  |
| Mus_musc Mus_musc  | 0.515948 | 0.573537 | 0.586133 | 0.826417 | 0.57487  | 0.847828  |
| ENSMUSG Ppm1b      | 31.89607 | 29.62484 | 29.2785  | 23.92833 | 23.99612 | 22.039759 |
| ENSMUSG Vmn1r130   | 0        | 0        | 0        | 0        | 0        | 0         |
| ENSMUSG Gm8926     | 0        | 0        | 0        | 0.134158 | 0        | 0.07968   |
| ENSMUSG Gm21915    | 0        | 0        | 0        | 0        | 0        | 0         |
| ENSMUSG Olfr237-ps | 0        | 0        | 0        | 0        | 0        | 0         |
| ENSMUSG Gm17267    | 0        | 0        | 0        | 0        | 0        | 0         |
| ENSMUSG Sftpb      | 2409.42  | 2222.073 | 2098.693 | 1556.557 | 1385.721 | 1666.0745 |
| ENSMUSG Taar1      | 0        | 0        | 0        | 0        | 0        | 0         |
| ENSMUSG Slfnl1     | 0        | 0        | 0.025599 | 0        | 0.066646 | 0         |
| ENSMUSG BC049715   | 0.325754 | 0.452645 | 0.384737 | 0.785786 | 0.507481 | 0.869422  |
| ENSMUSG Tspyl1     | 24.83081 | 28.95589 | 27.72234 | 23.8785  | 23.25772 | 21.577248 |

|                   |          |          |          |          |          |           |
|-------------------|----------|----------|----------|----------|----------|-----------|
| ENSMUSG Dmbt1     | 0        | 0.049772 | 0        | 0.266951 | 0.149991 | 0.112199  |
| ENSMUSG Olfr1396  | 0.046768 | 0        | 0.143424 | 0.29422  | 0.113045 | 0         |
| ENSMUSG Gm10600   | 0        | 0        | 0.002478 | 0        | 0        | 0.003352  |
| ENSMUSG Pex6      | 14.37098 | 14.19204 | 13.87907 | 12.36608 | 11.40702 | 12.676158 |
| ENSMUSG Zfp759    | 1.777605 | 1.995739 | 1.805026 | 1.759852 | 1.562597 | 1.519775  |
| Mus_musc Mus_musc | 0        | 0        | 0        | 0        | 0        | 0         |
| Mus_musc Mus_musc | 0        | 0.142113 | 0.291429 | 0        | 0        | 0         |
| Mus_musc Mus_musc | 0        | 0        | 0        | 0.174016 | 0        | 0.310426  |
| Mus_musc Mus_musc | 0        | 0        | 0        | 0        | 0        | 0.109306  |
| ENSMUSG Gm21671   | 0        | 0        | 0        | 0        | 0        | 0         |
| ENSMUSG Gm7980    | 0        | 0        | 0        | 0        | 0        | 0         |
| ENSMUSG Vmn2r-ps: | 0        | 0        | 0        | 0        | 0        | 0         |
| ENSMUSG Gm45871   | 2.695993 | 3.190203 | 2.836744 | 3.217865 | 3.121202 | 2.599344  |
| ENSMUSG Btd35f9   | 0        | 0        | 0        | 0        | 0        | 0         |
| ENSMUSG Cnn2      | 120.7426 | 112.9675 | 134.972  | 95.83734 | 90.73969 | 99.286636 |
| ENSMUSG Gm38303   | 0.055917 | 0.156642 | 0.156245 | 0.09162  | 0        | 0.052108  |
| ENSMUSG Brd3os    | 1.468587 | 1.959516 | 0.928081 | 1.164845 | 1.388684 | 1.516499  |
| ENSMUSG Exosc6    | 0.001312 | 0.001059 | 0.001001 | 0.000613 | 0.000679 | 0.000634  |
| ENSMUSG Terb1     | 0.198803 | 0.042003 | 0.082386 | 0.181644 | 0.060121 | 0.047084  |
| ENSMUSG Pcdh15    | 0.027366 | 0.018085 | 0        | 0.096489 | 0.03806  | 0.10492   |
| ENSMUSG Lbp       | 17.75079 | 25.0499  | 15.37346 | 30.43683 | 26.97686 | 28.898788 |
| ENSMUSG Prl7b1    | 0        | 0        | 0        | 0        | 0        | 0         |
| ENSMUSG Celsr1    | 4.792002 | 6.153052 | 3.820563 | 6.903798 | 7.377245 | 8.170934  |
| Mus_musc Mus_musc | 0.07467  | 0.076851 | 0        | 0.085982 | 0        | 0         |
| ENSMUSG Mgmt      | 0.548566 | 0.585831 | 0.590138 | 0.905978 | 0.678324 | 0.603633  |
| ENSMUSG Kdm2a     | 19.22623 | 18.75715 | 18.22182 | 17.79341 | 18.25648 | 17.54145  |
| ENSMUSG Mettl7a1  | 628.8271 | 660.811  | 575.2969 | 397.2785 | 397.5674 | 376.2241  |
| ENSMUSG Hist2h2ab | 0.063536 | 0.033712 | 0        | 0.016069 | 0.253128 | 0.140629  |
| ENSMUSG Pcdhb5    | 0.707764 | 0.445423 | 0.499736 | 0.393665 | 0.402537 | 0.493369  |
| ENSMUSG Glyat     | 0        | 0        | 0        | 0        | 0        | 0         |
| ENSMUSG Crb1      | 0.345411 | 0.227938 | 0.16898  | 0.018834 | 0.044925 | 0.031283  |
| ENSMUSG Nlk       | 9.091874 | 9.818496 | 8.861812 | 8.349662 | 8.776954 | 8.34306   |
| ENSMUSG Mlx       | 0.11252  | 0.138    | 0.114043 | 0.161764 | 0.333489 | 0.343444  |
| ENSMUSG Oxnad1    | 4.367768 | 5.340031 | 3.693196 | 4.585732 | 4.801511 | 5.299256  |
| ENSMUSG Vmn1r127  | 0        | 0        | 0        | 0        | 0        | 0         |
| ENSMUSG Sema3g    | 92.29915 | 79.15537 | 96.35339 | 55.7865  | 59.04526 | 55.844112 |
| ENSMUSG Dph3      | 7.318328 | 8.635117 | 7.914823 | 7.374667 | 6.664948 | 6.922105  |
| ENSMUSG Phf7      | 2.886015 | 2.945525 | 3.182648 | 4.189204 | 3.660999 | 3.459172  |
| ENSMUSG Galnt15   | 7.43717  | 7.317907 | 4.254849 | 3.013277 | 3.34308  | 2.585566  |
| ENSMUSG Btd       | 7.959539 | 8.656357 | 8.717918 | 8.087423 | 8.930465 | 9.075277  |
| ENSMUSG Bap1      | 19.59388 | 19.01805 | 18.31267 | 16.29868 | 17.4188  | 17.938313 |
| ENSMUSG Gm3629    | 0        | 0        | 0        | 0        | 0        | 0.053598  |
| ENSMUSG Idua      | 3.331224 | 3.72973  | 4.229494 | 3.900266 | 3.65663  | 3.669434  |
| ENSMUSG Rpl3l     | 0.070973 | 0.581545 | 0.169673 | 0.139972 | 0.168906 | 0.130337  |
| ENSMUSG Slc9a3r2  | 307.7244 | 280.4845 | 305.0957 | 167.5815 | 168.2349 | 170.64626 |
| ENSMUSG Tpsg1     | 0        | 0        | 0        | 0        | 0        | 0         |
| ENSMUSG S100b     | 0.137856 | 0.192367 | 0.12545  | 0.503521 | 0.575551 | 0.639936  |
| ENSMUSG Ttc28     | 8.461014 | 7.735733 | 5.917427 | 5.726948 | 6.921159 | 5.767481  |
| ENSMUSG Marf1     | 14.72061 | 16.8976  | 14.68813 | 13.59454 | 14.04934 | 13.927807 |
| ENSMUSG Gm7324    | 0.106761 | 0.124047 | 0.145293 | 0.157517 | 0.125709 | 0.304061  |
| ENSMUSG Tigd2     | 6.883689 | 6.284498 | 6.190074 | 5.950114 | 6.178604 | 6.309803  |
| ENSMUSG Gm9833    | 3.218215 | 2.381591 | 2.473668 | 2.448112 | 3.14699  | 2.262673  |
| ENSMUSG Mfsd4b1   | 0.251739 | 0.509734 | 0.162373 | 0.480121 | 0.359297 | 0.378492  |
| ENSMUSG 1700003F1 | 0.701646 | 0.131514 | 0.363309 | 0.334197 | 0.318226 | 0.431948  |
| ENSMUSG Tbc1d17   | 7.979904 | 11.03593 | 10.76285 | 8.610246 | 8.406599 | 7.960617  |
| ENSMUSG C1s1      | 23.95451 | 29.57132 | 27.6688  | 35.49319 | 33.45578 | 38.422351 |
| ENSMUSG Car14     | 3.506237 | 3.339856 | 3.139038 | 2.539658 | 1.943737 | 1.569211  |
| ENSMUSG C1rl      | 2.482421 | 2.009318 | 1.893055 | 2.981203 | 2.916533 | 2.834536  |
| ENSMUSG Fchsd1    | 2.030458 | 1.820402 | 2.172132 | 2.511885 | 1.722087 | 2.51345   |
| ENSMUSG Armc10    | 12.61477 | 13.49463 | 14.03976 | 12.59616 | 12.28363 | 12.719312 |
| ENSMUSG Krt80     | 90.64864 | 89.13829 | 96.07726 | 51.13521 | 56.77788 | 49.529727 |
| ENSMUSG Grhl3     | 0.229856 | 0.140311 | 0.210973 | 0.165905 | 0.259053 | 0.35116   |
| ENSMUSG Arsb      | 9.076406 | 8.670839 | 11.25028 | 12.01716 | 10.58242 | 10.81613  |
| Mus_musc Mus_musc | 0        | 0        | 0        | 0        | 0        | 0.184186  |



|                    |          |          |          |          |          |           |
|--------------------|----------|----------|----------|----------|----------|-----------|
| ENSMUSG Igsf5      | 10.68477 | 8.60347  | 9.07272  | 7.704291 | 8.242062 | 7.643032  |
| ENSMUSG Spg20      | 14.52957 | 12.94014 | 13.6611  | 9.897872 | 9.22222  | 10.491292 |
| ENSMUSG Grifin     | 0        | 0        | 0        | 0        | 0        | 0         |
| ENSMUSG Fut7       | 0.491472 | 0.177263 | 0.6132   | 0.488615 | 0.435885 | 0.42717   |
| ENSMUSG Fgf1       | 101.8544 | 101.6165 | 93.90497 | 52.72724 | 56.19429 | 50.728218 |
| ENSMUSG Avpi1      | 27.46769 | 28.47935 | 27.37754 | 22.57366 | 23.72711 | 26.07839  |
| ENSMUSG Zfyve27    | 11.46053 | 11.15022 | 12.69526 | 9.721209 | 10.20784 | 9.447024  |
| ENSMUSG Vmn1r69    | 0        | 0        | 0        | 0        | 0        | 0         |
| ENSMUSG Sfrp5      | 0.156957 | 0.491028 | 0.213037 | 0.231625 | 0.058955 | 0.25156   |
| Mus_musc Mus_musc  | 0        | 0        | 0        | 0        | 0        | 0         |
| ENSMUSG Ccdc69     | 2.016191 | 1.182517 | 1.753033 | 3.564954 | 3.553906 | 3.912265  |
| ENSMUSG Tsku       | 3.416573 | 3.606691 | 2.622742 | 2.25127  | 2.479721 | 3.109768  |
| ENSMUSG Psmb11     | 0        | 0        | 0        | 0        | 0        | 0.087093  |
| ENSMUSG Grm5       | 0        | 0        | 0        | 0.009753 | 0.01392  | 0.004669  |
| ENSMUSG Spred3     | 0.351632 | 0.354234 | 0.455637 | 0.550579 | 0.602239 | 0.667266  |
| ENSMUSG Grpel2     | 10.39525 | 11.7836  | 10.65258 | 10.4663  | 9.300452 | 10.507986 |
| ENSMUSG Matr3      | 34.46319 | 34.6464  | 33.03308 | 28.82405 | 29.61371 | 27.087652 |
| ENSMUSG Mxd4       | 121.7146 | 121.6555 | 112.8904 | 81.67726 | 86.41039 | 79.701911 |
| ENSMUSG Hook3      | 11.43398 | 12.08795 | 9.291883 | 10.07811 | 10.2985  | 9.208703  |
| ENSMUSG Pla2g12a   | 9.7037   | 10.82491 | 10.22204 | 7.608557 | 8.338832 | 7.769881  |
| ENSMUSG Plrg1      | 22.39689 | 25.91158 | 23.345   | 19.31095 | 17.27994 | 20.935587 |
| ENSMUSG Casp6      | 19.57102 | 20.24371 | 17.59081 | 19.03403 | 19.85382 | 20.123423 |
| ENSMUSG Sfrp2      | 3.729556 | 4.067894 | 3.592445 | 5.013542 | 3.55806  | 7.362898  |
| ENSMUSG Tlr2       | 9.310551 | 9.199423 | 8.484474 | 6.828373 | 8.065679 | 7.274013  |
| ENSMUSG Mcub       | 6.141175 | 5.162696 | 7.146569 | 9.223838 | 9.046898 | 11.288388 |
| ENSMUSG Trim2      | 7.212661 | 7.770801 | 5.838903 | 6.257442 | 6.44446  | 6.684642  |
| ENSMUSG Itgb2l     | 0.132815 | 0.076481 | 0.056894 | 0.092093 | 0.10306  | 0.06669   |
| ENSMUSG Gm20509    | 0        | 0        | 0        | 0        | 0        | 0         |
| ENSMUSG Vps28      | 82.3386  | 78.4291  | 81.18837 | 70.69751 | 67.40708 | 70.029083 |
| ENSMUSG Olfr977-ps | 0        | 0        | 0        | 0        | 0        | 0         |
| ENSMUSG Batf2      | 2.420744 | 2.67004  | 13.34535 | 6.003191 | 1.597287 | 2.722673  |
| ENSMUSG Msantd3    | 4.41888  | 4.170776 | 3.649857 | 3.482339 | 3.860263 | 2.667186  |
| ENSMUSG Tspan10    | 0.030667 | 0.020023 | 0        | 0.276665 | 0.268592 | 0.083761  |
| ENSMUSG Ncoa7      | 4.923477 | 6.063609 | 4.701478 | 5.39552  | 5.219887 | 6.356567  |
| ENSMUSG Psg20      | 0        | 0        | 0        | 0        | 0        | 0         |
| ENSMUSG 3830417A:  | 0        | 0        | 0        | 0        | 0        | 0         |
| ENSMUSG Dynlt3     | 47.91127 | 46.99061 | 42.1453  | 46.3845  | 45.71513 | 44.050213 |
| ENSMUSG Rpgr       | 2.580994 | 3.023681 | 2.342727 | 2.24958  | 2.623429 | 3.071042  |
| ENSMUSG Otc        | 0.183518 | 0.216736 | 0.269431 | 0.036919 | 0.113513 | 0.120487  |
| ENSMUSG Gm11559    | 0        | 0        | 0        | 0        | 0        | 0         |
| ENSMUSG Ftsj1      | 9.414128 | 9.112111 | 10.69612 | 8.295203 | 7.445635 | 8.162117  |
| ENSMUSG Trabd2b    | 1.503939 | 1.331113 | 1.346102 | 1.296272 | 1.208464 | 1.248163  |
| ENSMUSG Zfp804a    | 0        | 0        | 0        | 0.02034  | 0        | 0         |
| ENSMUSG Skint3     | 0        | 0        | 0        | 0        | 0        | 0         |
| ENSMUSG Ice1       | 12.04738 | 11.92325 | 10.3849  | 9.358524 | 10.21008 | 10.089499 |
| ENSMUSG Zfp395     | 9.258358 | 8.641556 | 8.899421 | 7.843607 | 7.772642 | 7.94773   |
| ENSMUSG Gjc1       | 15.33569 | 14.84623 | 16.88968 | 8.904897 | 9.366127 | 7.72694   |
| ENSMUSG Tox3       | 3.320561 | 3.032216 | 2.881301 | 3.273231 | 2.957112 | 2.779823  |
| ENSMUSG Mettl22    | 2.450075 | 2.513846 | 2.183072 | 2.191555 | 1.716189 | 1.93335   |
| ENSMUSG Atp6v0e2   | 25.79219 | 24.43647 | 23.29982 | 18.55641 | 17.59995 | 17.268551 |
| ENSMUSG Tmem221    | 0.819036 | 1.076894 | 0.552307 | 1.009178 | 0.780416 | 0.675656  |
| ENSMUSG Atp5mpl    | 35.69268 | 43.42688 | 41.23614 | 52.01133 | 47.94336 | 49.122907 |
| ENSMUSG Ankar      | 0        | 0        | 0        | 0        | 0        | 0         |
| ENSMUSG Pigh       | 4.208074 | 4.80791  | 4.895255 | 5.862126 | 5.046867 | 5.269564  |
| ENSMUSG Rdh12      | 0.839895 | 0.638889 | 0.733384 | 1.291246 | 0.848798 | 1.112204  |
| ENSMUSG Vti1b      | 46.93082 | 46.62083 | 47.85647 | 47.22167 | 44.62374 | 45.066994 |
| ENSMUSG Arg2       | 6.078146 | 4.98386  | 5.368999 | 9.28788  | 11.53211 | 13.423491 |
| ENSMUSG Zfp36l1    | 73.23334 | 78.15731 | 69.69857 | 68.58666 | 61.06207 | 64.095886 |
| ENSMUSG Tpk1       | 2.86718  | 3.421408 | 2.790546 | 2.366834 | 3.084268 | 2.722608  |
| ENSMUSG Nobox      | 0.059598 | 0.024455 | 0        | 0.01958  | 0.037772 | 0         |
| ENSMUSG Mcm7       | 9.793222 | 9.387553 | 9.482416 | 9.804179 | 10.72173 | 11.130627 |
| ENSMUSG Gm45713    | 0        | 0        | 0        | 0        | 0        | 0         |
| ENSMUSG Fbxo24     | 0.429248 | 0.425326 | 0.517997 | 0.530824 | 0.434501 | 0.530257  |
| ENSMUSG Pex19      | 33.71954 | 34.23331 | 30.7245  | 27.18161 | 25.71622 | 26.758687 |

|                   |          |          |          |          |          |           |
|-------------------|----------|----------|----------|----------|----------|-----------|
| ENSMUSG Urm1      | 10.64856 | 12.41459 | 12.35885 | 11.57909 | 10.298   | 9.480649  |
| ENSMUSG Reg3g     | 0.337042 | 10.28158 | 0        | 129.6274 | 104.1517 | 78.787445 |
| ENSMUSG Hprt      | 39.86033 | 39.06443 | 42.11495 | 39.95187 | 35.69539 | 35.569855 |
| ENSMUSG Gm47791   | 0        | 0.074215 | 0        | 0.032317 | 0        | 0         |
| ENSMUSG Arhgap45  | 30.51935 | 24.86233 | 37.57561 | 38.52602 | 33.05433 | 37.580353 |
| ENSMUSG Rnf38     | 15.73861 | 15.06361 | 14.67848 | 11.85584 | 13.73639 | 12.450651 |
| ENSMUSG Caps2     | 0.271711 | 0.334337 | 0.08548  | 0.759605 | 0.383778 | 0.412764  |
| ENSMUSG Msantd2   | 5.923788 | 7.888467 | 7.208343 | 5.197433 | 5.289885 | 5.196798  |
| ENSMUSG lsg15     | 11.60497 | 8.44088  | 22.98649 | 11.573   | 10.07348 | 10.532237 |
| ENSMUSG Slc51a    | 0.043172 | 0.033343 | 0.068455 | 0.038393 | 0.03818  | 0.096531  |
| ENSMUSG Ppig      | 11.55315 | 12.0608  | 11.86884 | 11.91253 | 11.66702 | 10.735326 |
| ENSMUSG Zfp655    | 9.669396 | 9.689709 | 8.545265 | 9.372971 | 10.44154 | 9.511891  |
| ENSMUSG Lmntd2    | 0.571281 | 0.519826 | 0.703237 | 0.743767 | 0.404053 | 0.523894  |
| ENSMUSG Rhoa      | 266.8447 | 255.9941 | 272.0908 | 201.5889 | 200.0614 | 202.83807 |
| ENSMUSG Zmiz1     | 35.34025 | 31.71503 | 29.32382 | 29.31416 | 28.53908 | 30.09348  |
| ENSMUSG Lamtor2   | 42.95841 | 40.57965 | 42.89601 | 46.88064 | 48.35141 | 43.486351 |
| ENSMUSG Lmna      | 66.36102 | 58.23626 | 62.30868 | 49.64088 | 47.38494 | 59.904895 |
| ENSMUSG Khdc4     | 21.23863 | 24.51522 | 24.20967 | 19.46492 | 18.14214 | 19.461137 |
| ENSMUSG Pmf1      | 5.734507 | 6.869571 | 5.59928  | 8.352241 | 8.687497 | 9.128886  |
| ENSMUSG Sema4a    | 11.80357 | 10.89971 | 16.8981  | 16.96179 | 17.57363 | 17.7822   |
| ENSMUSG lqgap3    | 0.140011 | 0.212242 | 0.16333  | 0.448584 | 0.955166 | 1.162614  |
| ENSMUSG Gpatch4   | 5.732272 | 5.967758 | 6.924506 | 7.188056 | 6.26819  | 6.19191   |
| ENSMUSG Pcmt2     | 19.38228 | 21.93498 | 17.79903 | 17.8565  | 16.84456 | 16.402063 |
| ENSMUSG Slc26a4   | 0.208272 | 0.33647  | 0.511533 | 34.32362 | 40.30607 | 48.729897 |
| ENSMUSG Bcap29    | 4.954484 | 4.019435 | 4.963297 | 8.158681 | 8.373094 | 8.975736  |
| ENSMUSG Klf11     | 10.27298 | 9.156816 | 10.98346 | 5.546797 | 6.904467 | 6.218832  |
| ENSMUSG Cenpo     | 2.192278 | 2.597687 | 2.53873  | 2.899654 | 2.394409 | 2.431244  |
| ENSMUSG Adcy3     | 5.373006 | 4.636146 | 5.273128 | 4.644989 | 4.400206 | 4.684332  |
| ENSMUSG Dnajc27   | 3.334596 | 3.25624  | 2.793062 | 2.796029 | 2.108813 | 2.241617  |
| ENSMUSG Grhl1     | 2.539021 | 3.123392 | 1.662821 | 1.283576 | 1.535355 | 1.328859  |
| ENSMUSG Cbl1      | 5.480464 | 5.573426 | 4.847604 | 4.52047  | 4.825412 | 4.554852  |
| ENSMUSG Efr3b     | 1.119486 | 1.220061 | 1.310513 | 1.327581 | 1.341721 | 1.546776  |
| ENSMUSG Kars      | 35.34719 | 34.64395 | 38.42098 | 35.23777 | 33.12646 | 31.933533 |
| ENSMUSG 4921536K  | 0.097863 | 0.24046  | 0.126735 | 0.31847  | 0.492897 | 0.678005  |
| ENSMUSG Tm9sf4    | 15.15036 | 14.23521 | 13.40857 | 14.15797 | 15.73568 | 16.20137  |
| ENSMUSG Zfand3    | 40.21287 | 41.59353 | 41.40948 | 33.132   | 34.22734 | 31.17194  |
| ENSMUSG Ascc1     | 16.39627 | 19.46806 | 16.59776 | 17.56645 | 16.28402 | 16.574515 |
| ENSMUSG Rhox9     | 0        | 0        | 0        | 0        | 0        | 0         |
| Mus_musc Mus_musc | 0        | 0        | 0.168936 | 0        | 0        | 0         |
| ENSMUSG Macf1     | 91.16346 | 87.45558 | 72.88228 | 75.88299 | 75.4765  | 74.202358 |
| ENSMUSG Psma7     | 97.87871 | 89.61676 | 107.2445 | 97.74073 | 93.03527 | 107.02981 |
| ENSMUSG Prex2     | 40.19214 | 38.23663 | 30.97195 | 24.35979 | 26.33191 | 22.946824 |
| ENSMUSG Slc22a29  | 0.049636 | 0.064042 | 0.061689 | 0        | 0.045795 | 0         |
| ENSMUSG Gm4981    | 0        | 0        | 0        | 0.041674 | 0        | 0         |
| ENSMUSG Car2      | 47.72193 | 44.41095 | 52.24778 | 66.84591 | 74.09324 | 67.90607  |
| ENSMUSG Yjefn3    | 0.910886 | 0.701567 | 1.070001 | 0.502763 | 0.484687 | 0.552324  |
| Mus_musc Mus_musc | 0        | 0        | 0.16105  | 0        | 0.307583 | 0.153725  |
| ENSMUSG Ntsr1     | 0        | 0        | 0        | 0        | 0        | 0         |
| ENSMUSG Mrgbp     | 9.314387 | 8.06277  | 8.709567 | 9.827678 | 7.66935  | 8.786608  |
| ENSMUSG Chrom5    | 0        | 0        | 0        | 0        | 0        | 0         |
| ENSMUSG Thra      | 41.24005 | 41.5214  | 43.0513  | 31.35504 | 31.77283 | 30.653637 |
| ENSMUSG Osm       | 0.404367 | 0.582463 | 0.617896 | 1.336907 | 1.120729 | 1.024536  |
| ENSMUSG Grem1     | 0.245511 | 0.182879 | 0.255033 | 0.176281 | 0.251459 | 0.341997  |
| ENSMUSG Gm29094   | 0        | 0        | 0        | 0.385526 | 1.418421 | 0         |
| ENSMUSG Atp11a    | 86.75741 | 96.55025 | 78.31978 | 93.36707 | 99.73307 | 107.56676 |
| Mus_musc Mus_musc | 0.298721 | 0        | 0        | 0.142118 | 0        | 0         |
| ENSMUSG Gm33815   | 0        | 0        | 0        | 0        | 0        | 0         |
| ENSMUSG Stc2      | 0.276773 | 0.431518 | 0.594407 | 0.43769  | 0.363548 | 0.413998  |
| ENSMUSG Olfr698   | 0        | 0        | 0        | 0        | 0        | 0         |
| ENSMUSG Fcgr4     | 6.976101 | 5.089257 | 16.81271 | 10.74661 | 8.160433 | 8.173999  |
| ENSMUSG Acox1     | 7.011878 | 7.593679 | 5.725045 | 6.190279 | 4.298522 | 4.650606  |
| ENSMUSG Zscan25   | 7.80761  | 6.771492 | 9.065415 | 6.440187 | 6.593989 | 7.224625  |
| ENSMUSG Fbln7     | 0        | 0        | 0.132459 | 0.22086  | 0.279345 | 0.278904  |
| ENSMUSG Zc3h8     | 0.930547 | 1.892901 | 1.292195 | 1.593577 | 1.53136  | 1.760034  |

|                   |          |          |          |          |          |           |
|-------------------|----------|----------|----------|----------|----------|-----------|
| ENSMUSG Ndufaf5   | 4.440912 | 5.704083 | 4.741151 | 5.036991 | 4.777147 | 5.129255  |
| ENSMUSG Cnm2      | 4.628469 | 4.603828 | 3.767659 | 3.818867 | 5.392267 | 4.594954  |
| ENSMUSG Usp40     | 5.711607 | 5.704319 | 5.207799 | 6.19037  | 5.499567 | 5.719299  |
| ENSMUSG Evx1      | 0        | 0        | 0        | 0        | 0        | 0         |
| ENSMUSG Kbtbd4    | 7.603648 | 7.711894 | 6.918147 | 7.580494 | 7.114331 | 7.910571  |
| ENSMUSG Celf1     | 18.80531 | 20.07135 | 18.45855 | 17.76139 | 18.4672  | 17.433646 |
| ENSMUSG Art5      | 0.054664 | 0.213403 | 0        | 0.117733 | 0.077489 | 0.149779  |
| ENSMUSG Gfer      | 5.858087 | 7.608096 | 7.935835 | 5.768278 | 8.109081 | 8.180978  |
| ENSMUSG Tmem205   | 42.51707 | 44.10848 | 40.1191  | 30.00246 | 30.55908 | 33.089731 |
| ENSMUSG Gm7971    | 0        | 0        | 0        | 0        | 0        | 0         |
| ENSMUSG Myo9b     | 22.69187 | 19.22179 | 21.39839 | 20.17216 | 20.55389 | 21.46871  |
| ENSMUSG Gm17584   | 0        | 0        | 0        | 0        | 0        | 0         |
| ENSMUSG Steap3    | 8.626002 | 6.60225  | 9.220568 | 10.72123 | 12.66913 | 11.913735 |
| ENSMUSG 3110009E1 | 2.494273 | 2.031463 | 2.239129 | 2.972379 | 1.14963  | 2.449869  |
| ENSMUSG Lcn10     | 0        | 0        | 0        | 0        | 0        | 0         |
| ENSMUSG Tfcp211   | 6.760196 | 6.63246  | 5.935512 | 7.362287 | 6.726524 | 7.7213    |
| ENSMUSG Epb41l5   | 18.22102 | 19.04463 | 15.49507 | 13.01139 | 12.40849 | 13.018617 |
| ENSMUSG Dbi       | 59.4192  | 78.13193 | 69.47951 | 104.2746 | 112.62   | 113.67279 |
| ENSMUSG Ptpn4     | 4.64017  | 5.547109 | 4.130653 | 4.162029 | 3.66917  | 3.713091  |
| ENSMUSG Sctr      | 0        | 0        | 0        | 0        | 0.01429  | 0         |
| Mus_musc Mus_musc | 0        | 0.076646 | 0        | 0        | 0        | 0.365499  |
| Mus_musc Mus_musc | 0        | 0        | 0        | 0.141094 | 0        | 0.120717  |
| Mus_musc Mus_musc | 0        | 0.319444 | 0.337368 | 0.761871 | 0.302242 | 0.153874  |
| ENSMUSG Gm12216   | 2.475392 | 1.880542 | 3.9291   | 2.60706  | 1.826015 | 2.235462  |
| ENSMUSG Gm10778   | 0.885398 | 1.003539 | 0.407496 | 0.920433 | 0.937196 | 0.757962  |
| ENSMUSG Gm20855   | 0        | 0        | 0        | 0        | 0        | 0         |
| ENSMUSG Gm8246    | 0        | 0        | 0        | 0        | 0        | 0         |
| ENSMUSG Gm8332    | 0        | 0        | 0        | 0        | 0        | 0         |
| ENSMUSG Kif5b     | 51.12649 | 51.45542 | 46.59218 | 42.68691 | 41.45981 | 39.965256 |
| ENSMUSG Trim16    | 32.16709 | 28.24715 | 31.262   | 17.68258 | 17.34589 | 17.989565 |
| ENSMUSG Angptl8   | 1.427952 | 1.126368 | 1.475506 | 1.973122 | 1.230875 | 1.196253  |
| ENSMUSG Pygo2     | 18.64403 | 16.97216 | 18.89597 | 16.23871 | 17.23236 | 16.773755 |
| ENSMUSG Cfl2      | 21.15727 | 20.51494 | 21.04425 | 14.75978 | 13.78042 | 14.291651 |
| Mus_musc Mus_musc | 0.144117 | 0        | 0        | 0        | 0.041223 | 0         |
| Mus_musc Mus_musc | 0        | 0        | 0        | 0        | 0        | 0         |
| Mus_musc Mus_musc | 0.205836 | 0.216148 | 0.144155 | 0.606756 | 0.580517 | 0.429064  |
| Mus_musc Mus_musc | 0.114828 | 0.808261 | 1.001873 | 1.241214 | 1.257262 | 0.873338  |
| ENSMUSG Gm648     | 0        | 0.072703 | 0        | 0        | 0        | 0         |
| ENSMUSG Tppp2     | 0        | 0        | 0        | 0        | 0        | 0         |
| ENSMUSG Cenpx     | 27.07894 | 27.58718 | 30.75438 | 30.14579 | 26.84156 | 31.986681 |
| ENSMUSG Dppa1     | 0        | 0        | 0        | 0        | 0        | 0         |
| ENSMUSG H2afb3    | 0        | 0        | 0        | 0        | 0        | 0         |
| ENSMUSG Lrrc45    | 11.8127  | 10.91521 | 11.74607 | 12.92974 | 11.35661 | 11.401581 |
| ENSMUSG B3galnt1  | 3.407096 | 4.024976 | 3.77524  | 4.32788  | 4.803001 | 4.778534  |
| ENSMUSG Kcnj6     | 0        | 0        | 0        | 0        | 0        | 0         |
| ENSMUSG Vmn1r75   | 0        | 0        | 0        | 0        | 0        | 0         |
| Mus_musc Mus_musc | 0        | 0        | 0        | 0        | 0        | 0.256259  |
| Mus_musc Mus_musc | 0        | 0        | 0        | 0        | 0        | 0         |
| Mus_musc Mus_musc | 0        | 0.056871 | 0.060601 | 1.938463 | 12.46059 | 6.57584   |
| Mus_musc Mus_musc | 0        | 0        | 0        | 0        | 0        | 0         |
| Mus_musc Mus_musc | 0.126729 | 0.210984 | 0.332655 | 0.097477 | 0.452127 | 0.275972  |
| ENSMUSG Gm45062   | 0        | 0        | 0        | 0        | 0        | 0         |
| ENSMUSG Myadml2   | 0.105427 | 0.370773 | 0.210671 | 0.284856 | 0.462219 | 0.395674  |
| Mus_musc Mus_musc | 0.193992 | 0        | 0        | 0.327662 | 0.173293 | 0.579341  |
| ENSMUSG Col18a1   | 7.723204 | 6.952164 | 9.249294 | 9.820247 | 9.41207  | 11.075342 |
| ENSMUSG Slc19a1   | 2.461119 | 2.836885 | 2.433986 | 2.609465 | 3.075078 | 2.658468  |
| ENSMUSG Ttl13     | 0.245862 | 0.240948 | 0.1851   | 0.58281  | 0.489214 | 0.452572  |
| ENSMUSG Zfp956    | 2.923697 | 2.556595 | 2.57049  | 2.759725 | 2.335946 | 2.466052  |
| Mus_musc Mus_musc | 0        | 0.228713 | 0.390487 | 0        | 0        | 0.226345  |
| ENSMUSG Nt5c3b    | 11.26746 | 12.49176 | 11.43894 | 10.87783 | 10.32054 | 11.348151 |
| ENSMUSG Dqx1      | 0.745717 | 0.955324 | 1.000396 | 0.768435 | 0.790214 | 0.896955  |
| Mus_musc Mus_musc | 0.345057 | 0.082525 | 0.249681 | 0.35809  | 0.100277 | 0.303723  |
| ENSMUSG Gm19410   | 0.026653 | 0        | 0.013192 | 0        | 0        | 0         |
| ENSMUSG Saa2      | 0        | 0        | 0        | 0        | 0.082465 | 0.334473  |

|                   |          |          |          |          |          |           |
|-------------------|----------|----------|----------|----------|----------|-----------|
| ENSMUSG Grb7      | 13.95841 | 14.82519 | 12.44261 | 13.31762 | 13.81301 | 13.167664 |
| ENSMUSG Olfr744   | 0        | 0        | 0        | 0        | 0        | 0         |
| ENSMUSG Olfr1029  | 0        | 0        | 0.01363  | 0        | 0        | 0         |
| ENSMUSG Olfr603   | 0        | 0        | 0        | 0        | 0        | 0         |
| ENSMUSG Zfp422    | 10.92987 | 10.93854 | 9.981189 | 9.483413 | 10.07341 | 9.880991  |
| ENSMUSG Camk2d    | 16.53728 | 14.79823 | 16.03223 | 15.33365 | 13.91845 | 15.843399 |
| Mus_musc Mus_musc | 4.656612 | 6.706519 | 4.824983 | 4.163932 | 3.604709 | 2.514487  |
| Mus_musc Mus_musc | 0.356067 | 0.28106  | 0.360008 | 0.211415 | 0.150365 | 0.348658  |
| Mus_musc Mus_musc | 0.169264 | 0.132514 | 0        | 0.116011 | 0        | 0         |
| Mus_musc Mus_musc | 0.230999 | 0        | 0        | 0        | 0        | 0         |
| Mus_musc Mus_musc | 0        | 0        | 0.168936 | 0        | 0        | 0         |
| Mus_musc Mus_musc | 0.339512 | 0.157556 | 0.366475 | 0.445671 | 0.81879  | 0.253764  |
| ENSMUSG Gm11099   | 0        | 0        | 0        | 0        | 0        | 0         |
| ENSMUSG Magea8    | 0        | 0        | 0        | 0        | 0        | 0         |
| ENSMUSG Achr4     | 5.147825 | 5.441145 | 4.0905   | 2.019298 | 3.080335 | 2.492869  |
| ENSMUSG Dpm1      | 1.802771 | 1.338872 | 4.826787 | 16.14622 | 1.725516 | 13.498843 |
| ENSMUSG Gm11011   | 0        | 0        | 0        | 0        | 0        | 0         |
| ENSMUSG 2310034G  | 1.733368 | 1.980621 | 1.108728 | 2.407075 | 2.102702 | 3.028113  |
| ENSMUSG Rpl13     | 368.8318 | 349.9908 | 408.3028 | 393.2334 | 405.1222 | 408.54395 |
| ENSMUSG Chmp1a    | 30.83862 | 28.51608 | 30.23323 | 31.14552 | 29.98918 | 32.709908 |
| ENSMUSG C77080    | 14.00119 | 14.29847 | 12.1064  | 15.48145 | 14.84376 | 16.731979 |
| ENSMUSG Foxl2     | 0        | 0        | 0        | 0.061675 | 0.017201 | 0.013011  |
| ENSMUSG Tnfsf15   | 0.768418 | 0.486764 | 0.656666 | 0.627644 | 0.657077 | 0.695307  |
| ENSMUSG Armcx6    | 2.681585 | 2.426441 | 2.685747 | 2.23201  | 2.088202 | 1.642814  |
| ENSMUSG Atp5s     | 4.67673  | 4.413294 | 4.446772 | 5.474579 | 3.400779 | 4.316716  |
| ENSMUSG Gm42791   | 0        | 0.175046 | 0.09117  | 0.14626  | 0.078758 | 0.051983  |
| ENSMUSG Olfr1535  | 0        | 0        | 0        | 0        | 0        | 0         |
| ENSMUSG Txk       | 1.331483 | 0.737928 | 2.607523 | 1.181983 | 0.673569 | 0.76221   |
| ENSMUSG Zfp667    | 1.766373 | 1.983832 | 1.673085 | 1.455251 | 1.711354 | 1.63142   |
| ENSMUSG Gm49358   | 0        | 0        | 0        | 0        | 0        | 0         |
| ENSMUSG Impad1    | 13.33911 | 13.58977 | 11.00315 | 10.765   | 11.58792 | 11.417887 |
| ENSMUSG Stau1     | 29.50421 | 28.35469 | 27.62776 | 23.34943 | 23.74972 | 22.015453 |
| ENSMUSG Olfr512   | 0        | 0        | 0        | 0        | 0        | 0         |
| ENSMUSG Mab21l1   | 0.031464 | 0.053067 | 0.059656 | 0        | 0        | 0.069328  |
| ENSMUSG Commd7    | 9.91792  | 9.368492 | 10.6635  | 9.486974 | 9.223379 | 8.970534  |
| ENSMUSG Zbtb33    | 7.187367 | 7.827785 | 6.873067 | 7.453282 | 7.510476 | 7.046303  |
| ENSMUSG Zup1      | 4.317427 | 4.866689 | 5.336818 | 6.699714 | 4.868198 | 4.486325  |
| Mus_musc Mus_musc | 0        | 0.393196 | 0        | 0.081174 | 0        | 0         |
| Mus_musc Mus_musc | 0.284597 | 0        | 0.568227 | 0.301231 | 0.160367 | 0.166397  |
| Mus_musc Mus_musc | 0.165087 | 0.094714 | 0        | 0        | 0        | 0         |
| Mus_musc Mus_musc | 0.074001 | 0.073389 | 0.193188 | 0.328999 | 0.259997 | 0.55058   |
| Mus_musc Mus_musc | 0        | 0.062368 | 0        | 0        | 0        | 0         |
| ENSMUSG Nkain3    | 0        | 0        | 0        | 0.011431 | 0        | 0.03182   |
| Mus_musc Mus_musc | 0.350697 | 0.562164 | 0.777299 | 0.423816 | 0.380688 | 0.06329   |
| Mus_musc Mus_musc | 0        | 0        | 0        | 0.337396 | 0.187038 | 0         |
| ENSMUSG Eef1akmt4 | 2.068439 | 2.458822 | 2.268786 | 3.384689 | 4.172736 | 4.504011  |
| ENSMUSG Tdrd6     | 0.015663 | 0        | 0.007586 | 0        | 0        | 0.015655  |
| ENSMUSG Maob      | 22.62356 | 24.28415 | 22.0197  | 15.63964 | 15.57089 | 16.10121  |
| ENSMUSG Rgl3      | 6.786176 | 6.137535 | 6.667419 | 6.183627 | 5.515083 | 5.626598  |
| ENSMUSG Cngb3     | 0        | 0.055719 | 0.040978 | 0        | 0        | 0         |
| ENSMUSG Bbs12     | 0.957623 | 1.271323 | 1.159153 | 1.312023 | 1.533517 | 1.146962  |
| ENSMUSG Tmbim7    | 0        | 0        | 0        | 0        | 0        | 0         |
| ENSMUSG Tmem154   | 6.74252  | 6.661433 | 6.093278 | 12.65866 | 13.05146 | 12.478426 |
| Mus_musc Mus_musc | 0        | 0        | 0        | 0        | 0        | 0         |
| Mus_musc Mus_musc | 0.937344 | 0.26398  | 0.504702 | 0        | 0.297032 | 0.292356  |
| Mus_musc Mus_musc | 0        | 0.121663 | 0        | 0.491313 | 0.051273 | 0.137958  |
| Mus_musc Mus_musc | 0        | 0        | 0        | 0        | 0        | 0         |
| ENSMUSG Olfr1284  | 0        | 0        | 0        | 0.007357 | 0        | 0         |
| ENSMUSG Atp23     | 2.520926 | 1.812514 | 3.044126 | 2.435058 | 2.669808 | 2.472998  |
| ENSMUSG Usp33     | 28.37875 | 29.84056 | 27.26964 | 25.51412 | 26.58642 | 25.887401 |
| ENSMUSG Hnf4a     | 0        | 0        | 0        | 0.021742 | 0.036765 | 0.03547   |
| ENSMUSG Crisp3    | 0        | 0        | 0.092635 | 0.171069 | 0.136363 | 0.249178  |
| ENSMUSG Crisp1    | 0        | 0        | 0        | 0.036008 | 0        | 0.116547  |
| ENSMUSG Clns1a    | 19.86113 | 22.22409 | 23.19334 | 21.48781 | 22.71235 | 25.376862 |

|                   |          |          |          |          |          |           |
|-------------------|----------|----------|----------|----------|----------|-----------|
| ENSMUSG Ncoa4     | 32.81441 | 41.95559 | 33.80922 | 30.79892 | 33.09691 | 37.473464 |
| ENSMUSG Serpinb9g | 0        | 0        | 0        | 0        | 0        | 0         |
| ENSMUSG Krt33b    | 0        | 0        | 0        | 0        | 0        | 0         |
| ENSMUSG Lepr      | 23.15939 | 22.06737 | 20.82016 | 14.78654 | 14.68426 | 13.634834 |
| ENSMUSG Prtn3     | 0.176107 | 0.671434 | 0.628442 | 0.467211 | 0        | 0.571916  |
| ENSMUSG Mip       | 0.02631  | 0.021672 | 0.045989 | 0.075649 | 0        | 0         |
| ENSMUSG Fscn2     | 0.124696 | 0.105575 | 0.081066 | 0.163451 | 0.090894 | 0.099566  |
| ENSMUSG Cnpy2     | 25.48405 | 26.9495  | 22.41499 | 33.59281 | 28.5603  | 28.600628 |
| ENSMUSG Il23a     | 0        | 0        | 0.074531 | 0.040563 | 0.118605 | 0.072864  |
| ENSMUSG Faap100   | 6.178361 | 5.165446 | 5.014859 | 4.4836   | 4.07139  | 4.646304  |
| ENSMUSG Pde6g     | 0.077093 | 0.127562 | 0        | 0        | 0.032567 | 0         |
| ENSMUSG Gm17720   | 1.741032 | 0        | 1.057415 | 0.586499 | 0        | 0         |
| ENSMUSG Glyatl3   | 0        | 0        | 0        | 0        | 0        | 0         |
| ENSMUSG Vmn2r55   | 0        | 0        | 0        | 0        | 0        | 0         |
| ENSMUSG Gm1979    | 0        | 0        | 0        | 0        | 0        | 0         |
| ENSMUSG Defa26    | 0        | 0        | 0        | 0        | 0        | 0         |
| ENSMUSG Psmc3     | 23.90411 | 24.66966 | 27.01861 | 25.00547 | 22.43769 | 23.383254 |
| ENSMUSG Gm17693   | 0        | 0        | 0        | 0        | 0        | 0         |
| ENSMUSG Vmn1r137  | 0        | 0        | 0        | 0        | 0        | 0         |
| ENSMUSG Vmn2r102  | 0        | 0        | 0        | 0        | 0        | 0         |
| ENSMUSG Dennd5a   | 59.31338 | 62.61501 | 61.04548 | 48.85832 | 50.67801 | 47.828919 |
| ENSMUSG Gramd4    | 6.941573 | 7.039766 | 8.378467 | 8.524289 | 8.788088 | 9.703053  |
| ENSMUSG Zpr1      | 8.466425 | 7.868144 | 8.685662 | 8.201531 | 8.43175  | 9.146199  |
| ENSMUSG Pmp2      | 0        | 0        | 0        | 0        | 0        | 0         |
| ENSMUSG Pick1     | 7.983805 | 8.070906 | 9.490994 | 8.54435  | 7.286386 | 8.643508  |
| ENSMUSG MacroD2   | 0.836891 | 0.848712 | 0.971012 | 0.905868 | 0.756331 | 0.694384  |
| ENSMUSG Xpot      | 16.33637 | 16.6422  | 13.87153 | 14.53732 | 14.57814 | 13.796174 |
| ENSMUSG Gm19935   | 9.074486 | 10.58272 | 6.051331 | 22.87735 | 22.03103 | 20.79254  |
| ENSMUSG Gm45861   | 0        | 0        | 0        | 0        | 0        | 0         |
| ENSMUSG Noa1      | 5.064028 | 5.51605  | 4.223441 | 5.074305 | 5.157132 | 5.020685  |
| ENSMUSG Stmnd1    | 3.779666 | 5.099112 | 3.131702 | 4.726524 | 5.145751 | 3.212922  |
| ENSMUSG Snapc4    | 3.531644 | 2.992479 | 3.394242 | 2.940148 | 3.12119  | 3.542769  |
| ENSMUSG Naa30     | 7.543529 | 7.836345 | 7.318688 | 6.720931 | 6.389976 | 6.536749  |
| ENSMUSG 201010910 | 0.567488 | 0.731659 | 0.533619 | 1.595425 | 1.546554 | 1.069434  |
| ENSMUSG Ftmt      | 0        | 0        | 0        | 0        | 0        | 0         |
| ENSMUSG Eno1      | 34.55162 | 36.16103 | 43.34387 | 50.28915 | 55.90149 | 56.520421 |
| ENSMUSG Fabp7     | 0        | 0.044013 | 0.099176 | 0.498893 | 0.927832 | 0.392652  |
| ENSMUSG Serinc1   | 110.3516 | 107.153  | 101.0576 | 88.37578 | 92.797   | 86.507004 |
| ENSMUSG Pkib      | 0.44962  | 0.510574 | 0.580108 | 1.724217 | 1.621068 | 1.933112  |
| ENSMUSG PAGR1b    | 0.399764 | 0.241095 | 0        | 0.49671  | 0        | 0.017143  |
| ENSMUSG Reep3     | 21.55849 | 20.926   | 19.43801 | 19.25821 | 20.27971 | 18.793398 |
| ENSMUSG Smpdl3a   | 63.5976  | 64.31077 | 63.80391 | 69.22414 | 65.61381 | 66.715528 |
| ENSMUSG Hsf2      | 5.545181 | 4.84891  | 4.920615 | 4.077246 | 4.255076 | 3.843511  |
| ENSMUSG Lymr7     | 0.935559 | 0.78136  | 0.907014 | 0.99671  | 0.686236 | 1.356336  |
| ENSMUSG Vmn1r220  | 0        | 0        | 0        | 0        | 0        | 0         |
| ENSMUSG Pofut2    | 25.60093 | 26.13412 | 24.4965  | 21.13581 | 23.97935 | 22.606133 |
| ENSMUSG H2a1c     | 0        | 0        | 0        | 0        | 0        | 0         |
| ENSMUSG A630095N  | 0        | 0        | 0        | 0        | 0.12619  | 0.102043  |
| ENSMUSG Fv1       | 2.978255 | 4.02613  | 3.930336 | 3.205176 | 3.448803 | 2.635999  |
| ENSMUSG Slc36a2   | 7.202557 | 7.583514 | 7.328206 | 9.259107 | 10.43022 | 11.694537 |
| ENSMUSG Sumo3     | 37.39791 | 39.74155 | 43.76335 | 39.11882 | 43.79976 | 43.795446 |
| ENSMUSG Hint1     | 85.04882 | 88.0321  | 87.33485 | 101.4539 | 86.78188 | 98.258632 |
| ENSMUSG Cyp4f37   | 0.096214 | 0.030856 | 0.085647 | 0.039633 | 0.096901 | 0.074939  |
| ENSMUSG Dag1      | 94.17843 | 90.3293  | 83.94098 | 68.17215 | 73.83773 | 70.645857 |
| ENSMUSG Clstn1    | 97.28076 | 91.24774 | 89.76531 | 57.10004 | 59.26375 | 58.843187 |
| ENSMUSG Stk32a    | 1.414656 | 0.948602 | 1.176271 | 0.725969 | 0.869198 | 0.859096  |
| ENSMUSG Mrap      | 0.312139 | 0.91841  | 0.126105 | 0.960827 | 0.380036 | 1.04836   |
| ENSMUSG Etfbkmt   | 11.29772 | 13.99474 | 10.16113 | 10.92086 | 7.328379 | 8.933683  |
| ENSMUSG Hip1      | 23.12557 | 23.34548 | 22.07025 | 21.96823 | 21.7183  | 22.620214 |
| ENSMUSG Olfr733   | 0        | 0        | 0        | 0        | 0        | 0         |
| ENSMUSG Zc3h11a   | 19.65945 | 16.84157 | 24.41659 | 4.552145 | 5.022577 | 12.011772 |
| ENSMUSG Olfr411   | 0        | 0        | 0        | 0        | 0        | 0         |
| ENSMUSG Dnajc8    | 87.18174 | 81.11513 | 89.38414 | 71.41031 | 70.27408 | 62.69211  |
| ENSMUSG Slfn5     | 47.72622 | 47.83342 | 56.28323 | 40.2888  | 38.29919 | 30.999693 |

|                    |          |          |          |          |          |           |
|--------------------|----------|----------|----------|----------|----------|-----------|
| ENSMUSG Stk35      | 12.40438 | 12.92734 | 13.20782 | 8.70448  | 10.49343 | 9.685188  |
| ENSMUSG Cklf       | 3.944317 | 3.621225 | 4.852799 | 4.871494 | 5.531194 | 5.522836  |
| ENSMUSG Tmem74     | 0.131217 | 0.07125  | 0.110374 | 0.087551 | 0.074878 | 0.103892  |
| ENSMUSG Spcs3      | 19.27301 | 19.42901 | 20.47773 | 37.28075 | 38.74178 | 37.00058  |
| ENSMUSG Olfr1471   | 0        | 0        | 0        | 0        | 0        | 0         |
| ENSMUSG Gucd1      | 7.267853 | 8.531606 | 9.02254  | 9.231312 | 8.850845 | 8.950578  |
| ENSMUSG Gm20767    | 0        | 0        | 0        | 0        | 0        | 0         |
| ENSMUSG Hist1h3g   | 0.035832 | 0.012811 | 0.059606 | 0.177956 | 0        | 0.176541  |
| ENSMUSG Ctdspl2    | 7.447708 | 8.614219 | 7.19763  | 6.165707 | 7.471169 | 7.01568   |
| ENSMUSG Gm13275    | 0        | 0.04188  | 0.099546 | 0.011569 | 0        | 0.113229  |
| ENSMUSG Snap91     | 0.034085 | 0.113597 | 0.00974  | 0        | 0.067252 | 0.024467  |
| ENSMUSG St13       | 32.03902 | 38.97579 | 35.58849 | 32.96243 | 35.28378 | 32.217092 |
| ENSMUSG Rbx1       | 35.00457 | 38.47565 | 36.71848 | 30.01748 | 32.44633 | 28.34097  |
| ENSMUSG Olfr1357   | 0        | 0        | 0        | 0        | 0        | 0         |
| ENSMUSG Smim15     | 27.93301 | 26.48393 | 27.30813 | 24.74147 | 22.29285 | 23.548794 |
| ENSMUSG Cebpzos    | 5.311136 | 4.784163 | 4.520037 | 6.05379  | 5.152279 | 8.900357  |
| ENSMUSG Cav3       | 0.482186 | 1.149517 | 1.180801 | 0.978521 | 1.088044 | 2.295085  |
| ENSMUSG Acad10     | 4.997561 | 4.369864 | 4.441718 | 3.388265 | 3.804283 | 3.452748  |
| ENSMUSG Nxn        | 6.928839 | 7.529088 | 7.484853 | 6.814453 | 6.088407 | 6.193137  |
| ENSMUSG Rflnb      | 11.47152 | 10.49646 | 9.823984 | 12.97255 | 13.66418 | 15.707279 |
| ENSMUSG Rph3al     | 8.130633 | 6.807052 | 6.935626 | 8.072577 | 6.712347 | 7.655129  |
| ENSMUSG Blmh       | 15.86724 | 17.8706  | 14.99827 | 15.51998 | 14.13277 | 15.876747 |
| ENSMUSG Cpd        | 40.23689 | 37.3634  | 35.91558 | 31.31094 | 34.15346 | 31.806549 |
| ENSMUSG Timm22     | 7.466103 | 7.026213 | 7.079866 | 6.507713 | 6.525382 | 8.017832  |
| ENSMUSG Eif2a      | 16.15672 | 15.15089 | 14.85972 | 16.65194 | 15.3951  | 16.017224 |
| ENSMUSG 4930579G   | 1.240244 | 1.646018 | 1.287945 | 1.5468   | 1.746853 | 1.631965  |
| ENSMUSG Doc2b      | 0.795587 | 0.299596 | 0.490074 | 0.147441 | 0.297826 | 0.252015  |
| ENSMUSG Ywhae      | 175.7293 | 180.622  | 175.8515 | 153.5739 | 160.9947 | 160.05655 |
| ENSMUSG Tm4sf20    | 0        | 0.144077 | 0.031816 | 0        | 0        | 0.009405  |
| ENSMUSG Serpinb2   | 0.155965 | 0.280431 | 0.620028 | 1.669093 | 1.931157 | 1.898221  |
| ENSMUSG Rhbdd1     | 11.8902  | 11.18811 | 9.226654 | 9.274569 | 9.498487 | 9.019452  |
| ENSMUSG Col19a1    | 0.009256 | 0        | 0        | 0        | 0        | 0         |
| ENSMUSG Serpinb9e  | 0        | 0        | 0        | 0        | 0        | 0         |
| ENSMUSG Clec4d     | 3.042613 | 2.815299 | 4.349244 | 2.507578 | 3.464321 | 3.224661  |
| ENSMUSG Zfp248     | 1.719964 | 1.637583 | 1.868848 | 1.393726 | 0.992516 | 1.312495  |
| ENSMUSG Clec4b1    | 2.046512 | 1.160522 | 1.836704 | 3.597279 | 4.03586  | 3.087584  |
| ENSMUSG Clec4e     | 0.930972 | 0.860253 | 1.534984 | 1.014963 | 1.307365 | 0.838217  |
| ENSMUSG Gm8882     | 0        | 0        | 0        | 0        | 0        | 0         |
| ENSMUSG Clec4a2    | 4.346817 | 3.795877 | 4.0673   | 17.00091 | 19.61586 | 18.376311 |
| ENSMUSG Klrk1      | 2.115469 | 1.644519 | 6.271275 | 2.666309 | 1.535134 | 2.06317   |
| ENSMUSG Emc8       | 11.39712 | 10.10182 | 11.01986 | 10.65558 | 8.938128 | 9.96432   |
| ENSMUSG Krtap10-1l | 0        | 0        | 0        | 0        | 0        | 0         |
| ENSMUSG Mvb12a     | 24.82944 | 20.86355 | 21.53012 | 24.79862 | 24.53539 | 24.606224 |
| ENSMUSG Map1lc3b   | 89.9994  | 94.56362 | 88.53485 | 77.03504 | 81.97926 | 74.850193 |
| ENSMUSG Mthfsd     | 8.083341 | 6.232729 | 4.380816 | 6.386791 | 5.514189 | 6.947454  |
| ENSMUSG Nhp2       | 14.25517 | 14.57666 | 14.50051 | 18.13173 | 18.28496 | 21.55904  |
| ENSMUSG Kdm3b      | 17.98195 | 15.70198 | 15.38923 | 15.46398 | 15.38668 | 14.865664 |
| ENSMUSG Kpna7      | 0        | 0        | 0        | 0        | 0        | 0         |
| ENSMUSG Sema6c     | 0.687144 | 0.932354 | 0.699082 | 0.492797 | 0.465197 | 0.370099  |
| ENSMUSG Ephx1      | 125.0179 | 115.5762 | 99.05514 | 58.04583 | 53.62361 | 53.991441 |
| ENSMUSG Vill       | 2.740325 | 3.443458 | 1.227212 | 3.661748 | 3.709511 | 3.080047  |
| ENSMUSG Ascc3      | 5.294367 | 5.180567 | 5.27744  | 7.122708 | 7.042982 | 6.544925  |
| ENSMUSG Flt3       | 1.076206 | 1.189958 | 1.324049 | 1.471857 | 2.378962 | 2.066946  |
| ENSMUSG Gpr151     | 0.068626 | 0.070871 | 0.030828 | 0.079922 | 0.036813 | 0.030792  |
| ENSMUSG Mcts2      | 3.821038 | 3.141344 | 3.6814   | 3.963447 | 4.794227 | 3.513272  |
| ENSMUSG Foxf1      | 151.2951 | 125.4587 | 152.8847 | 54.24346 | 67.58418 | 59.471718 |
| ENSMUSG Krba1      | 3.373252 | 2.970894 | 2.945326 | 2.82134  | 2.937131 | 2.700486  |
| ENSMUSG Lce3e      | 0        | 0        | 0        | 0        | 0        | 0         |
| ENSMUSG Gm4924     | 1.735981 | 1.370949 | 1.176157 | 1.182645 | 0.944034 | 0.872306  |
| ENSMUSG Lrrc19     | 0.07908  | 0        | 0.033787 | 0.020117 | 0        | 0.016916  |
| ENSMUSG Fzd4       | 35.93398 | 37.94479 | 31.03    | 19.42051 | 24.52318 | 18.956793 |
| ENSMUSG Bag5       | 29.48542 | 26.51117 | 27.81621 | 17.40825 | 16.60919 | 16.851297 |
| ENSMUSG Olfr642    | 0        | 0        | 0        | 0        | 0        | 0         |
| ENSMUSG Crh        | 0.042734 | 0        | 0        | 0        | 0        | 0         |

|                    |          |          |          |          |          |           |
|--------------------|----------|----------|----------|----------|----------|-----------|
| ENSMUSG Tut7       | 30.55131 | 29.82938 | 30.49528 | 26.62849 | 25.60383 | 24.18992  |
| ENSMUSG Miga2      | 7.084437 | 8.606566 | 7.638389 | 7.655549 | 7.526037 | 7.922325  |
| ENSMUSG Usp20      | 3.976582 | 4.171696 | 4.73933  | 4.001268 | 4.161036 | 4.456498  |
| ENSMUSG Ntmt1      | 6.427774 | 6.499218 | 7.454331 | 6.509145 | 5.547098 | 6.980936  |
| ENSMUSG Dolpp1     | 6.053343 | 5.780178 | 6.478307 | 7.714007 | 7.03327  | 8.300729  |
| ENSMUSG BC005624   | 23.54526 | 26.02438 | 24.60581 | 22.86482 | 22.26664 | 22.721699 |
| ENSMUSG Eogt       | 20.16427 | 18.76004 | 22.79931 | 13.98073 | 13.57863 | 13.201695 |
| ENSMUSG Crat       | 15.40574 | 16.7836  | 14.8524  | 19.85482 | 18.78682 | 20.421928 |
| ENSMUSG Hectd1     | 24.64573 | 24.34239 | 20.805   | 22.39899 | 22.92944 | 22.719416 |
| ENSMUSG Ccbe1      | 4.605975 | 3.98471  | 3.858173 | 2.791008 | 2.738721 | 2.629886  |
| ENSMUSG Zfp62      | 11.57147 | 11.69338 | 10.7164  | 10.52996 | 10.57525 | 10.397507 |
| ENSMUSG AI464131   | 7.52311  | 8.282231 | 6.09053  | 6.563844 | 7.707347 | 7.718094  |
| ENSMUSG Stxbp6     | 13.9588  | 13.74786 | 12.52117 | 10.87836 | 12.80527 | 10.970814 |
| ENSMUSG Aqp6       | 0        | 0        | 0        | 0        | 0        | 0         |
| ENSMUSG BC107364   | 0        | 0        | 0        | 0        | 0        | 0         |
| ENSMUSG Arl1       | 60.28934 | 63.34088 | 59.21647 | 58.41176 | 61.14625 | 58.946153 |
| ENSMUSG Henmt1     | 0.103803 | 0.124453 | 0.017333 | 0.023341 | 0        | 0         |
| ENSMUSG Mfsd5      | 23.35385 | 22.97994 | 26.11171 | 20.36475 | 23.96964 | 23.155067 |
| ENSMUSG Cdc42ep2   | 26.95032 | 21.69551 | 26.51561 | 19.35594 | 19.9702  | 19.59033  |
| ENSMUSG Smtnl2     | 9.794275 | 9.939896 | 6.915532 | 7.40703  | 6.07953  | 6.655276  |
| ENSMUSG Tril       | 8.281377 | 7.12884  | 6.530612 | 3.820827 | 3.54806  | 3.016355  |
| ENSMUSG Ccdc57     | 1.555911 | 1.47283  | 1.126208 | 1.524742 | 1.299824 | 1.350708  |
| ENSMUSG Smim5      | 4.050285 | 3.393822 | 2.485832 | 4.555736 | 3.54084  | 3.070694  |
| ENSMUSG Cyp4f16    | 7.545578 | 6.035292 | 8.088534 | 5.470188 | 6.379421 | 6.475263  |
| ENSMUSG Ptgdr      | 0.0354   | 0.024354 | 0        | 0.591101 | 0.450417 | 0.218631  |
| ENSMUSG Golga3     | 12.6489  | 12.95988 | 11.23131 | 11.48241 | 12.06964 | 11.366412 |
| ENSMUSG P2rx2      | 0.169372 | 0.167417 | 0        | 0.35741  | 0.305958 | 0.396227  |
| ENSMUSG Pgam5      | 10.61615 | 11.98238 | 11.5298  | 10.6082  | 10.794   | 10.867705 |
| ENSMUSG Ankle2     | 10.7391  | 10.37646 | 9.086011 | 10.34957 | 11.40473 | 10.177803 |
| ENSMUSG Pus1       | 7.484315 | 5.657117 | 7.063712 | 6.55649  | 6.841592 | 7.734037  |
| ENSMUSG Ddx51      | 3.476797 | 3.970454 | 3.684682 | 3.037383 | 3.452633 | 3.150417  |
| ENSMUSG Ep400      | 14.96308 | 14.80975 | 13.21557 | 13.92805 | 13.71729 | 13.827167 |
| ENSMUSG Rbm45      | 9.509556 | 8.902295 | 9.923619 | 11.91259 | 10.99665 | 10.426417 |
| ENSMUSG Snx18      | 13.80642 | 15.05693 | 15.34421 | 12.51153 | 12.32577 | 13.466885 |
| ENSMUSG Gjb3       | 0.864445 | 0.646457 | 0.588581 | 0.550928 | 0.782817 | 0.919623  |
| ENSMUSG Lgalsl     | 16.31623 | 17.05232 | 15.51695 | 12.11141 | 11.68878 | 10.054111 |
| ENSMUSG Atp8b5     | 0.212973 | 0.147423 | 0.126719 | 0.528623 | 0.367068 | 0.396325  |
| ENSMUSG Unc13b     | 10.14387 | 11.05979 | 9.145167 | 8.80869  | 9.376526 | 8.922442  |
| ENSMUSG Stoml2     | 16.36425 | 16.22021 | 17.13345 | 14.78713 | 14.69597 | 16.436186 |
| ENSMUSG Pigo       | 2.946554 | 3.414468 | 3.327409 | 4.388498 | 4.414406 | 3.8203    |
| ENSMUSG Fancg      | 2.828479 | 3.006441 | 4.289247 | 3.567551 | 3.83164  | 3.794496  |
| ENSMUSG Vcp        | 77.58373 | 74.64729 | 81.84577 | 87.30614 | 90.82864 | 87.510078 |
| ENSMUSG 170002211  | 0.354407 | 0.384139 | 0.476854 | 0.404419 | 0.423923 | 0.324462  |
| ENSMUSG Olfr893    | 0        | 0        | 0        | 0        | 0        | 0         |
| ENSMUSG Cd72       | 3.980855 | 3.16599  | 5.463518 | 9.570136 | 6.325388 | 7.632573  |
| ENSMUSG Tesk1      | 10.96622 | 10.49594 | 11.10546 | 8.944494 | 9.863703 | 9.673133  |
| ENSMUSG Pram1      | 0.949237 | 0.754008 | 1.398288 | 0.584001 | 0.668381 | 0.486258  |
| ENSMUSG Nsd2       | 7.557111 | 7.805031 | 7.508849 | 8.358534 | 7.803731 | 9.048967  |
| ENSMUSG Snx33      | 11.54466 | 10.30749 | 10.27269 | 8.016849 | 8.105944 | 7.813067  |
| ENSMUSG Ablim3     | 18.9466  | 16.89601 | 18.38177 | 13.57688 | 13.39201 | 12.877315 |
| ENSMUSG Inpp1      | 21.70795 | 23.20926 | 21.87237 | 23.06516 | 22.36838 | 23.60912  |
| ENSMUSG Cox7a1     | 1.930896 | 6.622715 | 2.19964  | 2.251012 | 1.718063 | 2.206837  |
| ENSMUSG Gm10644    | 0.617549 | 0.819147 | 0.595851 | 0.63501  | 0.355061 | 0.369663  |
| ENSMUSG Pot1b      | 2.897194 | 2.847826 | 3.669543 | 2.644191 | 2.311294 | 2.82182   |
| ENSMUSG Tekt4      | 4.990607 | 5.453221 | 2.813843 | 7.283192 | 5.661382 | 7.290021  |
| ENSMUSG Sox8       | 0.197746 | 0.133046 | 0.124631 | 0.617908 | 0.538958 | 0.274622  |
| ENSMUSG 2210011C;  | 14.5406  | 9.964821 | 10.95396 | 5.642006 | 6.686249 | 7.121204  |
| ENSMUSG Telo2      | 2.760498 | 2.258876 | 2.634609 | 2.3604   | 2.367797 | 2.670309  |
| ENSMUSG Prss28     | 0        | 0        | 0        | 0        | 0        | 0         |
| ENSMUSG St6gal2    | 0.042553 | 0.007632 | 0        | 0.033908 | 0.00911  | 0         |
| ENSMUSG Tpsab1     | 0.126384 | 0        | 0.127141 | 0.650986 | 0.83448  | 0.804509  |
| ENSMUSG Ccny       | 30.5744  | 27.65748 | 27.22924 | 20.93615 | 22.06756 | 20.118593 |
| ENSMUSG Thoc1      | 4.499844 | 4.506574 | 4.811396 | 4.883152 | 4.518228 | 4.396089  |
| ENSMUSG Olfr1191-f | 0        | 0        | 0        | 0        | 0        | 0         |

|                   |          |          |          |          |          |           |
|-------------------|----------|----------|----------|----------|----------|-----------|
| ENSMUSG Wac       | 29.712   | 30.63474 | 27.26138 | 24.21459 | 26.78969 | 20.528121 |
| ENSMUSG Olfr607   | 0        | 0        | 0        | 0        | 0        | 0         |
| ENSMUSG Chrna3    | 0        | 0.027335 | 0        | 0.021882 | 0.012338 | 0         |
| ENSMUSG Cdc25c    | 0.078758 | 0.054537 | 0.250227 | 0.403886 | 0.46928  | 0.353474  |
| ENSMUSG Olfr983   | 0        | 0        | 0        | 0        | 0        | 0         |
| ENSMUSG Vsig4     | 0.286643 | 0.307756 | 0        | 0.087494 | 0.053713 | 0.397698  |
| ENSMUSG Necab3    | 0.293598 | 0.123262 | 0.263321 | 0.353727 | 0.162501 | 0.19043   |
| ENSMUSG Snta1     | 4.858352 | 5.228852 | 5.658835 | 3.996907 | 4.275439 | 3.792657  |
| ENSMUSG Bpifb1    | 0.591098 | 7.326875 | 0.142885 | 82.12692 | 55.25937 | 62.570125 |
| ENSMUSG Bpifa5    | 0        | 0        | 0        | 0        | 0        | 0         |
| ENSMUSG Cdk5rap1  | 3.16623  | 3.179474 | 2.902958 | 2.831642 | 3.143172 | 3.439608  |
| ENSMUSG Bpifb2    | 0        | 0        | 0        | 0        | 0        | 0         |
| ENSMUSG Sun5      | 0        | 0        | 0        | 0        | 0        | 0         |
| ENSMUSG Bpifa1    | 1.218804 | 128.1963 | 0        | 15.12973 | 6.724554 | 6.133518  |
| ENSMUSG Bpifa3    | 0        | 0        | 0        | 0.39771  | 0.090374 | 0         |
| ENSMUSG Dpf2      | 32.37552 | 28.92746 | 31.72756 | 23.99793 | 24.287   | 21.034195 |
| ENSMUSG Glc       | 0.074381 | 0.090884 | 0.14153  | 0.023548 | 0.05376  | 0.072419  |
| ENSMUSG Rad9a     | 10.6912  | 9.164241 | 10.89022 | 8.100929 | 8.468468 | 10.051019 |
| ENSMUSG Mrpl21    | 13.3057  | 14.23842 | 14.26385 | 14.83515 | 14.69359 | 15.512935 |
| ENSMUSG Zfp426    | 9.991933 | 9.591614 | 9.982744 | 9.446541 | 8.522477 | 8.15065   |
| ENSMUSG MbtD1     | 5.76701  | 5.732288 | 5.575015 | 5.467732 | 5.42426  | 5.071478  |
| ENSMUSG Olfr979   | 0        | 0        | 0        | 0        | 0        | 0         |
| ENSMUSG B3gnt8    | 1.547291 | 1.416603 | 1.51027  | 1.938621 | 1.782086 | 1.794538  |
| ENSMUSG Orai3     | 18.30509 | 18.59409 | 18.36318 | 17.54227 | 16.52959 | 18.931202 |
| ENSMUSG Thrap3    | 42.39256 | 42.72142 | 39.6059  | 41.73352 | 42.46221 | 40.260479 |
| ENSMUSG Emx2      | 0        | 0        | 0        | 0        | 0        | 0         |
| ENSMUSG Rab33b    | 11.26283 | 11.12344 | 9.745903 | 8.493204 | 8.744019 | 8.386049  |
| ENSMUSG Gm6121    | 0        | 0        | 0        | 0        | 0        | 0         |
| ENSMUSG Hoxa4     | 1.80706  | 2.657237 | 2.452118 | 1.607827 | 1.326406 | 1.378161  |
| ENSMUSG Pvalb     | 0        | 0        | 0        | 0.299586 | 0.170735 | 0.112925  |
| ENSMUSG Tfap4     | 3.383174 | 2.021781 | 2.75243  | 2.124242 | 2.332241 | 1.780136  |
| ENSMUSG Gm38393   | 0.276568 | 0.064638 | 0        | 0.033624 | 0        | 0         |
| ENSMUSG Kat8      | 12.18661 | 14.7093  | 15.18766 | 9.492467 | 12.79391 | 12.64032  |
| ENSMUSG Prss8     | 39.38686 | 40.59859 | 29.18763 | 30.90657 | 31.79176 | 29.062756 |
| ENSMUSG Bckdk     | 11.6356  | 10.99004 | 11.56392 | 12.08186 | 12.24045 | 12.341062 |
| ENSMUSG Stx4a     | 31.24111 | 31.19372 | 37.12884 | 33.88854 | 32.50729 | 31.082525 |
| ENSMUSG Gm21974   | 0        | 0        | 0        | 0        | 0        | 0         |
| ENSMUSG Stx1b     | 0.334327 | 0.238878 | 0.224354 | 0.32759  | 0.194101 | 0.408722  |
| ENSMUSG Zbtb38    | 13.28826 | 12.86862 | 10.10805 | 11.76279 | 12.94684 | 11.09621  |
| ENSMUSG Ltb4r2    | 0.126118 | 0.134364 | 0.095327 | 0.015842 | 0        | 0.191994  |
| ENSMUSG Pitpnc1   | 31.55226 | 33.6316  | 36.46659 | 21.27138 | 20.57577 | 19.434739 |
| ENSMUSG Ppp1r15a  | 34.57121 | 28.41541 | 37.06072 | 16.50386 | 17.1221  | 17.908429 |
| ENSMUSG Large2    | 1.945034 | 2.077856 | 1.877851 | 2.266106 | 2.103017 | 1.950806  |
| ENSMUSG 4930503E1 | 0        | 0        | 0        | 0        | 0        | 0         |
| ENSMUSG Atxn1     | 5.196114 | 4.888113 | 4.856658 | 3.595834 | 3.597949 | 3.892528  |
| ENSMUSG Mbtps2    | 4.94375  | 5.793049 | 5.55596  | 6.190682 | 5.920034 | 5.626415  |
| ENSMUSG Ear2      | 115.4942 | 113.1079 | 118.3765 | 343.2467 | 426.3046 | 369.6944  |
| ENSMUSG Irgm1     | 18.09662 | 15.38064 | 82.91054 | 49.76372 | 17.27607 | 21.206554 |
| ENSMUSG Nefh      | 0.097688 | 0.102886 | 0.124608 | 0.120862 | 0.101246 | 0.175056  |
| ENSMUSG Aftph     | 21.21613 | 21.24791 | 20.22875 | 18.44523 | 18.69478 | 18.690587 |
| ENSMUSG Tor1aip1  | 31.69278 | 43.20798 | 55.49297 | 40.37878 | 40.0392  | 33.741125 |
| ENSMUSG Atp2b4    | 8.112184 | 7.88632  | 7.21132  | 4.455549 | 5.053307 | 4.7489    |
| ENSMUSG Lhx4      | 0        | 0        | 0        | 0        | 0        | 0         |
| ENSMUSG Xpr1      | 10.37313 | 11.61182 | 8.7016   | 9.229704 | 9.337855 | 9.127329  |
| ENSMUSG Rpl11     | 304.0206 | 315.0365 | 307.7202 | 355.1121 | 349.0842 | 358.61149 |
| ENSMUSG Commd9    | 14.12746 | 12.11218 | 13.85191 | 11.94341 | 12.31041 | 14.92419  |
| ENSMUSG Elp4      | 2.168073 | 2.501045 | 1.727162 | 2.541485 | 2.073951 | 1.86552   |
| Mus_musc Mus_musc | 0.016028 | 0.01371  | 0.035356 | 0        | 0        | 0         |
| Mus_musc Mus_musc | 0        | 0.426802 | 0        | 0        | 0        | 0         |
| Mus_musc Mus_musc | 3.920597 | 3.776578 | 2.874775 | 3.204723 | 2.702749 | 2.838178  |
| Mus_musc Mus_musc | 0        | 0        | 0        | 0.309059 | 0.281645 | 0.130001  |
| Mus_musc Mus_musc | 0        | 0        | 0        | 0.116858 | 0        | 0         |
| Mus_musc Mus_musc | 0        | 0.153969 | 0        | 0        | 0        | 0.227692  |
| ENSMUSG Castor2   | 3.779593 | 4.975275 | 3.799424 | 4.604578 | 5.684563 | 4.634995  |



|                    |          |          |          |          |          |           |
|--------------------|----------|----------|----------|----------|----------|-----------|
| ENSMUSG Fcgr1      | 1.987658 | 2.489004 | 4.909073 | 2.12627  | 2.519229 | 2.257118  |
| ENSMUSG Bola1      | 13.4977  | 12.41441 | 11.86138 | 14.47012 | 13.48405 | 13.348173 |
| ENSMUSG Gtf2ird2   | 3.317466 | 3.521212 | 3.172275 | 2.554512 | 2.805658 | 3.096197  |
| ENSMUSG Olfr898    | 0        | 0        | 0        | 0        | 0        | 0         |
| ENSMUSG Vmn1r118   | 0        | 0        | 0        | 0        | 0        | 0         |
| ENSMUSG Vmn1r41    | 0        | 0        | 0        | 0        | 0        | 0         |
| ENSMUSG Ms4a18     | 0        | 0        | 0        | 0        | 0        | 0         |
| ENSMUSG Gm27027    | 0.00526  | 0        | 0        | 0        | 0        | 0         |
| Mus_musc Mus_musc  | 0        | 0.17577  | 0        | 0        | 0        | 0         |
| Mus_musc Mus_musc  | 0        | 0.24891  | 0        | 0.189021 | 0.170639 | 0.171868  |
| Mus_musc Mus_musc  | 0.24253  | 0        | 0        | 0.268434 | 0.200284 | 0.347626  |
| Mus_musc Mus_musc  | 0.376063 | 0        | 0.137007 | 0        | 0.189259 | 0         |
| Mus_musc Mus_musc  | 0.287739 | 0.802231 | 2.319321 | 1.797281 | 1.4344   | 0.861415  |
| Mus_musc Mus_musc  | 0        | 0        | 0        | 0.302201 | 0        | 0         |
| Mus_musc Mus_musc  | 0.180146 | 0.056746 | 0        | 0.353926 | 0.178863 | 0         |
| ENSMUSG Cd300ld5   | 2.594935 | 1.571436 | 2.64055  | 7.739323 | 5.667014 | 6.617671  |
| ENSMUSG Krtap4-8   | 0        | 0        | 0        | 0        | 0        | 0         |
| ENSMUSG Klra8      | 0        | 0        | 0        | 0        | 0        | 0         |
| Mus_musc Mus_musc  | 0        | 0.154347 | 0        | 0        | 0        | 0         |
| Mus_musc Mus_musc  | 0        | 0.319007 | 0.372238 | 0.329632 | 0.365287 | 0.679987  |
| Mus_musc Mus_musc  | 1.067149 | 1.284752 | 1.122336 | 1.185301 | 0.908119 | 0.825431  |
| Mus_musc Mus_musc  | 2.974821 | 2.539154 | 2.252939 | 2.109271 | 2.821779 | 2.173597  |
| Mus_musc Mus_musc  | 1.284875 | 0.997033 | 0.227824 | 0.583237 | 0.504935 | 0.810262  |
| Mus_musc Mus_musc  | 2.022048 | 1.144661 | 0.518325 | 1.013547 | 0.913293 | 1.24814   |
| Mus_musc Mus_musc  | 1.610998 | 0.791048 | 0.709972 | 0.913368 | 1.407121 | 0.902088  |
| Mus_musc Mus_musc  | 1.238795 | 1.136372 | 0.791627 | 0.576396 | 0.43661  | 0.354966  |
| ENSMUSG Svs3b      | 0        | 0        | 0        | 0        | 0        | 0         |
| Mus_musc Mus_musc  | 1.788061 | 1.073174 | 1.023647 | 0.466309 | 0.494151 | 0.650983  |
| Mus_musc Mus_musc  | 0        | 0        | 0        | 0        | 0        | 0         |
| ENSMUSG Nr2f6      | 20.74771 | 16.24798 | 16.1589  | 17.53707 | 20.77077 | 20.390038 |
| ENSMUSG Use1       | 50.40017 | 62.31156 | 66.14882 | 48.43965 | 44.21755 | 50.010725 |
| ENSMUSG Ocel1      | 13.69394 | 13.71063 | 12.69397 | 12.6438  | 12.34912 | 12.744933 |
| Mus_musc Mus_musc  | 0.188031 | 0        | 0        | 0        | 0        | 0         |
| Mus_musc Mus_musc  | 0        | 0        | 0        | 0        | 0.093346 | 0.134942  |
| Mus_musc Mus_musc  | 0        | 0.154309 | 0        | 0        | 0        | 0         |
| Mus_musc Mus_musc  | 0        | 0        | 0        | 0.234784 | 0        | 0         |
| Mus_musc Mus_musc  | 0.984805 | 1.62296  | 1.05598  | 1.012727 | 1.295772 | 0.969098  |
| Mus_musc Mus_musc  | 0.17583  | 0.582012 | 0.112167 | 0.318996 | 0.124606 | 0.251415  |
| Mus_musc Mus_musc  | 0        | 0        | 0        | 0        | 0        | 0         |
| Mus_musc Mus_musc  | 0.377633 | 0.370535 | 0.235292 | 0.808814 | 1.044514 | 0.920449  |
| ENSMUSG Ube2e2     | 11.50503 | 11.2148  | 10.67341 | 8.226653 | 6.677768 | 9.047108  |
| Mus_musc Mus_musc  | 0        | 0        | 0        | 0.256619 | 0        | 0         |
| Mus_musc Mus_musc  | 2.583333 | 2.012799 | 3.049711 | 1.653837 | 1.945799 | 1.966131  |
| ENSMUSG Olfr1381   | 0        | 0        | 0        | 0        | 0        | 0         |
| Mus_musc Mus_musc  | 0        | 0        | 0        | 0        | 0        | 0.367683  |
| ENSMUSG Olfr1472   | 0        | 0        | 0        | 0        | 0        | 0         |
| ENSMUSG Rps18      | 34.75501 | 23.65002 | 43.85048 | 38.17879 | 36.4522  | 35.033322 |
| ENSMUSG Gsdma3     | 0        | 0        | 0.046675 | 0        | 0        | 0         |
| ENSMUSG Paqr9      | 0.153333 | 0.22144  | 0.142264 | 0.074124 | 0.058103 | 0.03247   |
| ENSMUSG Hist2h2aa1 | 55.08482 | 46.0801  | 54.5015  | 57.64903 | 52.87833 | 35.370934 |
| ENSMUSG Pam16      | 14.91606 | 13.33765 | 13.56524 | 14.72489 | 15.66771 | 13.991819 |
| ENSMUSG Glis2      | 20.30713 | 17.66794 | 19.69453 | 11.74407 | 10.61221 | 12.951846 |
| Mus_musc Mus_musc  | 0.911138 | 0.662598 | 0.543877 | 0.455274 | 0.310174 | 0.247612  |
| Mus_musc Mus_musc  | 1.890913 | 2.31747  | 1.664396 | 1.627374 | 0.846774 | 1.645415  |
| Mus_musc Mus_musc  | 0.637043 | 0.161018 | 0.236172 | 0.600036 | 0.447687 | 0.505126  |
| ENSMUSG Nudt8      | 3.191607 | 3.328881 | 2.121339 | 3.5403   | 4.138778 | 5.485909  |
| ENSMUSG Brms1      | 18.34767 | 16.18004 | 20.09602 | 18.98311 | 17.98939 | 19.788115 |
| Mus_musc Mus_musc  | 1.934646 | 1.801476 | 1.495856 | 1.338915 | 1.244271 | 1.349043  |
| Mus_musc Mus_musc  | 0.308374 | 0        | 0        | 0.262284 | 0.104213 | 0.32221   |
| Mus_musc Mus_musc  | 0.262438 | 0.072266 | 0.312603 | 1.025676 | 1.137399 | 0.525193  |
| ENSMUSG Olfr497    | 0        | 0        | 0        | 0        | 0        | 0         |
| Mus_musc Mus_musc  | 0        | 0        | 0        | 0.174027 | 0        | 0         |
| Mus_musc Mus_musc  | 0.285052 | 0.222617 | 0.399    | 0.299295 | 0.489568 | 0.219154  |
| Mus_musc Mus_musc  | 0        | 0.39311  | 0.472348 | 0.301326 | 0.125702 | 0         |

|                    |          |          |          |          |          |           |
|--------------------|----------|----------|----------|----------|----------|-----------|
| Mus_musc Mus_musc  | 0.054612 | 0        | 0.064593 | 0        | 0        | 0         |
| ENSMUSG Scgb1b19   | 0        | 0        | 0        | 0        | 0        | 0         |
| ENSMUSG Olfr38     | 0        | 0        | 0        | 0        | 0        | 0         |
| Mus_musc Mus_musc  | 0        | 0.222425 | 0.209238 | 0.777386 | 0.516788 | 0.551957  |
| ENSMUSG Gm21586    | 0        | 0.041297 | 0.035006 | 0.308132 | 0        | 0         |
| ENSMUSG Gm6370     | 0        | 0        | 0        | 0        | 0        | 0         |
| ENSMUSG Gm2663     | 0        | 0        | 0        | 0        | 0        | 0         |
| ENSMUSG Gm3376     | 0        | 0        | 0        | 0        | 0        | 0         |
| ENSMUSG Pipox      | 0.213253 | 0.280352 | 0.148644 | 0.160952 | 0.065595 | 0.138923  |
| ENSMUSG Jakmip1    | 0        | 0        | 0        | 0        | 0        | 0         |
| ENSMUSG Gm9938     | 5.57541  | 5.882381 | 3.569305 | 4.379737 | 4.3844   | 4.351872  |
| ENSMUSG Cisd1      | 22.37227 | 24.02598 | 21.24746 | 23.66604 | 23.52246 | 26.887281 |
| ENSMUSG Fermt2     | 90.22656 | 89.59628 | 88.54607 | 52.56698 | 55.67099 | 51.01078  |
| ENSMUSG Ccdc33     | 0.81809  | 1.496669 | 0.704861 | 2.085306 | 1.841869 | 1.524151  |
| ENSMUSG Ubb        | 604.4896 | 661.5866 | 696.0836 | 630.6948 | 638.3453 | 684.14853 |
| ENSMUSG Gm29276    | 0        | 0        | 0        | 0        | 0        | 0         |
| ENSMUSG A130010J1  | 1.199606 | 1.974182 | 1.517865 | 2.479731 | 1.95171  | 1.602173  |
| Mus_musc Mus_musc  | 0.31716  | 0        | 0.353698 | 0.154425 | 0.324212 | 0.138271  |
| Mus_musc Mus_musc  | 0        | 0.058673 | 0        | 0        | 0        | 0         |
| Mus_musc Mus_musc  | 0.708099 | 1.16868  | 0.486362 | 0.34461  | 0.197425 | 0.619023  |
| Mus_musc Mus_musc  | 0        | 0.054607 | 0.155112 | 0.339389 | 0.373385 | 0.358194  |
| Mus_musc Mus_musc  | 0        | 0        | 0.060082 | 0.190034 | 0        | 0.326243  |
| Mus_musc Mus_musc  | 0.195282 | 0        | 0.056457 | 0.525217 | 0.404291 | 0.13518   |
| Mus_musc Mus_musc  | 0.096285 | 0        | 0        | 0.145214 | 0        | 0.129248  |
| Mus_musc Mus_musc  | 0.028451 | 0.043203 | 0.094149 | 0.467816 | 0.208985 | 0.362262  |
| ENSMUSG Hnrnp1     | 61.98462 | 62.03869 | 60.68686 | 60.03374 | 58.40372 | 60.043227 |
| ENSMUSG Tom1l2     | 21.08956 | 20.53981 | 21.3193  | 15.67988 | 16.24293 | 15.467964 |
| ENSMUSG Lgsn       | 0.020968 | 0.036486 | 0        | 0.032432 | 0        | 0.112014  |
| ENSMUSG Olfr70     | 0        | 0        | 0        | 0        | 0        | 0         |
| ENSMUSG Eva1b      | 47.89908 | 40.04187 | 48.44822 | 30.46197 | 29.2954  | 30.466262 |
| ENSMUSG Snip1      | 9.212698 | 7.843122 | 7.921341 | 7.054815 | 9.424898 | 8.832104  |
| ENSMUSG Acvrl1     | 304.4829 | 268.7844 | 350.3661 | 184.7421 | 182.9642 | 192.60174 |
| ENSMUSG Grasp      | 14.07382 | 11.97524 | 14.62097 | 6.547365 | 7.08179  | 7.596572  |
| ENSMUSG Olfr863-ps | 0        | 0        | 0        | 0        | 0        | 0         |
| ENSMUSG Fam228b    | 0.057049 | 0.115773 | 0        | 0.086306 | 0.057887 | 0.132868  |
| ENSMUSG Nthl1      | 5.540915 | 6.778596 | 4.812959 | 5.673526 | 4.517989 | 6.003379  |
| ENSMUSG Paqr6      | 3.036685 | 2.493306 | 2.925929 | 2.116623 | 2.173901 | 2.949655  |
| ENSMUSG Meis3      | 2.769191 | 2.544527 | 3.610193 | 3.779877 | 3.675968 | 3.817831  |
| ENSMUSG Hibch      | 6.184693 | 7.635315 | 6.270886 | 8.018779 | 7.480956 | 8.009183  |
| ENSMUSG Fam47c     | 0        | 0        | 0        | 0        | 0        | 0         |
| ENSMUSG Sost       | 0.252969 | 0.456647 | 0.054786 | 0.100316 | 0.154161 | 0.087457  |
| ENSMUSG Gm8765     | 0.006294 | 0.002864 | 0        | 0        | 0        | 0         |
| ENSMUSG Gm21921    | 0        | 0        | 0        | 0        | 0        | 0         |
| ENSMUSG D430019H   | 1.978002 | 1.999273 | 2.010358 | 2.180285 | 2.049356 | 1.783703  |
| ENSMUSG Gm9507     | 0        | 0        | 0        | 0        | 0        | 0         |
| ENSMUSG Slc7a4     | 5.595141 | 4.314413 | 4.265354 | 4.317014 | 3.707219 | 4.523242  |
| ENSMUSG Tfg        | 25.28141 | 22.67821 | 26.33629 | 26.52847 | 24.72665 | 27.225285 |
| ENSMUSG Tmem45a    | 2.193306 | 2.307869 | 2.33352  | 2.710232 | 2.989082 | 2.593303  |
| ENSMUSG Adgrg7     | 0        | 0        | 0        | 0.093522 | 0.053766 | 0.057755  |
| ENSMUSG Tomm70a    | 11.55626 | 10.89804 | 10.20802 | 10.15876 | 11.08121 | 10.725344 |
| ENSMUSG Tmem30c    | 0        | 0        | 0.037255 | 0        | 0.019378 | 0         |
| ENSMUSG Klhl22     | 10.09432 | 9.606135 | 9.981618 | 10.72086 | 9.812481 | 10.0475   |
| ENSMUSG Nit2       | 7.315344 | 7.470729 | 6.02645  | 7.785266 | 7.223397 | 6.730318  |
| ENSMUSG P2rx6      | 2.554056 | 2.700428 | 2.249993 | 1.864155 | 1.765074 | 2.484248  |
| ENSMUSG Lrrc74b    | 3.177343 | 3.738311 | 2.289932 | 6.05533  | 5.858511 | 5.193151  |
| ENSMUSG Fbxl13     | 0.606462 | 1.016776 | 0.449047 | 1.192718 | 0.770912 | 0.832017  |
| ENSMUSG Rnf185     | 17.23174 | 18.85163 | 17.56452 | 14.60788 | 15.84996 | 15.16959  |
| ENSMUSG Abat       | 1.467656 | 1.706326 | 1.112175 | 1.55052  | 1.244396 | 1.720229  |
| ENSMUSG Arf5       | 56.01944 | 47.80257 | 50.95105 | 51.69223 | 51.78178 | 58.138229 |
| ENSMUSG 2310033P   | 15.71255 | 11.07875 | 14.03905 | 13.43621 | 11.57311 | 13.317024 |
| ENSMUSG Guk1       | 47.23624 | 48.41645 | 43.91225 | 43.03285 | 41.4092  | 39.910385 |
| ENSMUSG Npc1l1     | 0        | 0.04888  | 0.04629  | 0        | 0.031178 | 0         |
| Mus_musc Mus_musc  | 0.56789  | 1.082931 | 0.511838 | 0.403833 | 0.195412 | 0.208053  |
| Mus_musc Mus_musc  | 0.56313  | 0.501705 | 0.30978  | 0.948812 | 0.744945 | 0.980361  |

|                    |          |          |          |          |          |           |
|--------------------|----------|----------|----------|----------|----------|-----------|
| ENSMUSG Plac9b     | 8.630659 | 6.735499 | 7.6449   | 6.842543 | 5.996444 | 5.482121  |
| Mus_musc Mus_musc  | 0        | 0        | 0        | 0.122639 | 0.081502 | 0.1111    |
| Mus_musc Mus_musc  | 0        | 0.308619 | 0        | 0        | 0        | 0         |
| Mus_musc Mus_musc  | 0        | 0        | 0        | 0        | 0        | 0.343017  |
| Mus_musc Mus_musc  | 0        | 0        | 0        | 0        | 0        | 0         |
| ENSMUSG Rnf5       | 22.25925 | 23.56988 | 21.48942 | 25.20233 | 26.25765 | 26.01058  |
| ENSMUSG Ndc1       | 2.555837 | 2.414448 | 2.101881 | 2.396632 | 3.046376 | 2.726049  |
| ENSMUSG Lrrc42     | 11.83505 | 12.2036  | 12.4252  | 11.33821 | 10.38519 | 12.410817 |
| ENSMUSG Dmrtb1     | 0.030311 | 0.021807 | 0        | 0.16878  | 0.178165 | 0.092921  |
| ENSMUSG Lrp8       | 0.321243 | 0.421972 | 0.426958 | 1.075675 | 0.578679 | 0.748844  |
| ENSMUSG Tceanc2    | 3.508549 | 3.843906 | 3.703139 | 4.320016 | 3.715466 | 3.506697  |
| ENSMUSG Tmem59     | 176.0384 | 185.5843 | 173.5454 | 145.6344 | 145.9818 | 134.99611 |
| ENSMUSG Mtcl1      | 17.60303 | 17.7884  | 15.60162 | 11.59892 | 12.3664  | 10.777282 |
| ENSMUSG Gnpda1     | 6.036967 | 6.621243 | 6.071066 | 12.35973 | 13.65828 | 13.647298 |
| ENSMUSG Tasp1      | 3.18215  | 2.660747 | 2.811269 | 3.241196 | 2.773023 | 3.236965  |
| ENSMUSG Aars2      | 2.972514 | 3.176287 | 3.486142 | 2.800418 | 2.95416  | 3.667611  |
| ENSMUSG Arhgap18   | 10.66189 | 11.0681  | 9.127339 | 12.32788 | 11.88157 | 11.891441 |
| ENSMUSG St6galnac5 | 0.300607 | 0.483072 | 0.276731 | 0.246288 | 0.265331 | 0.152858  |
| ENSMUSG Efhb       | 0.585803 | 0.560792 | 0.513165 | 0.873481 | 0.712842 | 1.136953  |
| ENSMUSG Crisp2     | 0        | 0        | 0.019556 | 0.094999 | 0.023925 | 0.023603  |
| ENSMUSG Cdc5l      | 15.32736 | 15.37575 | 14.41214 | 12.75037 | 15.89534 | 14.126786 |
| ENSMUSG Spats1     | 0        | 0        | 0        | 0        | 0        | 0         |
| ENSMUSG E330034G   | 0        | 0        | 0        | 0        | 0        | 0         |
| ENSMUSG Tuba3a     | 0        | 0        | 0        | 0        | 0        | 0         |
| ENSMUSG Erlin1     | 13.13061 | 13.42829 | 11.97708 | 9.068121 | 9.822472 | 9.794074  |
| ENSMUSG Tas2r110   | 0        | 0        | 0        | 0        | 0        | 0         |
| ENSMUSG Wfdc13     | 0.169824 | 0        | 0.160127 | 0.581998 | 0.280039 | 0.35431   |
| ENSMUSG Got1       | 8.607509 | 8.357819 | 9.364383 | 15.50577 | 15.46765 | 15.473568 |
| ENSMUSG Cutc       | 4.81699  | 5.400006 | 5.430462 | 5.099774 | 5.114554 | 4.551098  |
| ENSMUSG Entpd7     | 1.11809  | 1.455462 | 1.163786 | 1.550672 | 1.671943 | 1.88022   |
| ENSMUSG Dnmbp      | 7.820471 | 8.083954 | 6.964897 | 5.660273 | 6.173996 | 6.391922  |
| ENSMUSG Abcc2      | 0.017709 | 0        | 0        | 0        | 0.056415 | 0.020307  |
| ENSMUSG Cyp2c23    | 0.290732 | 0.323518 | 0.287323 | 0.232052 | 0.126768 | 0.055563  |
| ENSMUSG Cpn1       | 2.295671 | 3.0676   | 2.747523 | 2.162446 | 1.92912  | 2.814986  |
| ENSMUSG Cog1       | 12.70452 | 10.89016 | 11.12854 | 9.744487 | 10.75027 | 10.996147 |
| ENSMUSG Cbx1       | 22.71939 | 23.98649 | 24.09935 | 22.73378 | 21.82374 | 22.381055 |
| ENSMUSG Cdk5rap3   | 13.06538 | 11.88008 | 12.07734 | 17.20215 | 16.6447  | 18.381934 |
| ENSMUSG Hbap4      | 12.8049  | 13.0975  | 14.38356 | 10.67566 | 9.898762 | 10.734799 |
| ENSMUSG Ctst       | 90.46686 | 75.40359 | 86.22641 | 207.5164 | 211.1204 | 289.86061 |
| ENSMUSG Olfr594    | 0        | 0        | 0        | 0        | 0        | 0         |
| ENSMUSG Olfr593    | 0        | 0        | 0        | 0        | 0        | 0         |
| ENSMUSG Olfr597    | 0        | 0        | 0        | 0        | 0        | 0         |
| ENSMUSG Olfr596    | 0        | 0        | 0        | 0        | 0        | 0         |
| ENSMUSG Ercc6l2    | 4.817698 | 4.369236 | 3.840754 | 4.023474 | 3.964703 | 4.437925  |
| ENSMUSG Olfr598    | 0        | 0        | 0        | 0        | 0        | 0         |
| ENSMUSG Gm8267     | 0        | 0        | 0        | 0        | 0        | 0         |
| ENSMUSG Drd1       | 0        | 0.012816 | 0        | 0        | 0        | 0.030904  |
| ENSMUSG Olfr584    | 0        | 0        | 0        | 0        | 0        | 0         |
| ENSMUSG Pnp2       | 3.810466 | 3.659146 | 3.746594 | 3.689662 | 3.596397 | 0.7105    |
| ENSMUSG Glra4      | 0.048985 | 0        | 0.027679 | 0        | 0        | 0.022432  |
| ENSMUSG Sparc      | 558.4888 | 509.12   | 517.8239 | 369.1456 | 392.8037 | 396.89987 |
| ENSMUSG Mief2      | 5.155432 | 5.115915 | 5.103921 | 5.100288 | 5.00183  | 5.341949  |
| ENSMUSG Gm29582    | 0        | 0        | 0        | 0        | 0        | 0         |
| ENSMUSG Esp22      | 0        | 0        | 0        | 0        | 0        | 0         |
| ENSMUSG Ptp4a1     | 21.57987 | 23.12819 | 18.48727 | 17.435   | 17.36216 | 17.381045 |
| ENSMUSG Oas1f      | 0        | 0        | 0        | 0        | 0        | 0         |
| ENSMUSG Acer1      | 0        | 0        | 0        | 0        | 0        | 0         |
| ENSMUSG Lysmd1     | 5.288836 | 4.755645 | 4.567169 | 4.232285 | 5.085144 | 3.680917  |
| ENSMUSG Chchd3     | 25.08635 | 27.71974 | 26.12376 | 32.18814 | 31.42184 | 33.350632 |
| ENSMUSG Csgalnact2 | 31.45909 | 31.07195 | 29.53582 | 23.20268 | 23.42645 | 19.809473 |
| ENSMUSG Fam207a    | 11.97784 | 12.25708 | 11.96977 | 10.50748 | 11.69654 | 12.951124 |
| ENSMUSG Guca2b     | 0        | 0        | 0        | 0.208819 | 0.245173 | 0         |
| ENSMUSG Lpcat4     | 7.184509 | 6.302872 | 7.388079 | 8.183445 | 7.132633 | 7.454159  |
| ENSMUSG Chil4      | 0.013247 | 0        | 0        | 226.1849 | 209.3902 | 166.14687 |

|                   |          |          |          |          |          |           |
|-------------------|----------|----------|----------|----------|----------|-----------|
| ENSMUSG Emc4      | 39.80767 | 39.25716 | 40.67355 | 35.73854 | 31.43002 | 38.205803 |
| ENSMUSG Slc12a6   | 24.29411 | 24.98707 | 21.33178 | 21.27964 | 20.99928 | 21.796385 |
| ENSMUSG Nop10     | 14.90942 | 19.93011 | 18.86281 | 18.19732 | 15.64563 | 17.25704  |
| ENSMUSG Katnbl1   | 6.449321 | 7.906866 | 6.914682 | 6.154593 | 6.179444 | 7.281341  |
| ENSMUSG Olfr1469  | 0        | 0        | 0        | 0        | 0        | 0         |
| ENSMUSG Myo5c     | 19.18592 | 20.99394 | 18.13428 | 19.82337 | 20.21857 | 22.248525 |
| ENSMUSG Rfwd3     | 9.257111 | 9.976623 | 9.50898  | 9.490598 | 9.463366 | 10.174145 |
| ENSMUSG Caskin1   | 0.350047 | 0.289162 | 0.233648 | 0.218388 | 0.274461 | 0.249389  |
| ENSMUSG Spata2l   | 2.338091 | 1.944701 | 2.441923 | 2.282073 | 1.944991 | 2.060925  |
| ENSMUSG Lgi3      | 71.53338 | 76.75919 | 72.48766 | 70.25841 | 64.28633 | 73.405064 |
| ENSMUSG Olfr481   | 0        | 0        | 0        | 0        | 0        | 0         |
| ENSMUSG Fra10ac1  | 4.991282 | 4.076208 | 5.454336 | 3.632246 | 4.640676 | 4.800613  |
| ENSMUSG Psg26     | 0        | 0        | 0        | 0        | 0        | 0         |
| ENSMUSG Psg25     | 0        | 0        | 0        | 0.050151 | 0        | 0         |
| ENSMUSG Dip2c     | 7.280533 | 7.508114 | 6.65668  | 4.779455 | 5.633984 | 5.325516  |
| ENSMUSG Psg27     | 0        | 0        | 0        | 0        | 0        | 0         |
| ENSMUSG Psg21     | 0        | 0        | 0        | 0        | 0        | 0         |
| ENSMUSG Pdpr      | 7.588143 | 7.797914 | 5.988947 | 7.611861 | 7.803193 | 7.883745  |
| ENSMUSG Pcgf3     | 8.968705 | 8.747733 | 8.242797 | 7.061687 | 6.958813 | 7.575896  |
| ENSMUSG Pik3c3    | 12.37726 | 12.71023 | 10.81811 | 10.2328  | 10.8259  | 9.189246  |
| ENSMUSG Hacd3     | 47.90806 | 48.3015  | 42.51329 | 47.38237 | 46.06397 | 45.811642 |
| ENSMUSG Adamts8   | 6.226019 | 4.869247 | 6.908417 | 6.3403   | 7.060148 | 6.811221  |
| ENSMUSG St14      | 14.70666 | 16.39202 | 12.63496 | 17.23273 | 17.68938 | 18.009242 |
| ENSMUSG Aplp2     | 257.1822 | 266.2137 | 255.3724 | 188.6275 | 194.9637 | 194.77238 |
| ENSMUSG Trpc6     | 7.575625 | 7.490698 | 7.80385  | 4.243245 | 4.429588 | 3.462979  |
| ENSMUSG Jam3      | 4.785555 | 5.157958 | 4.87553  | 3.307472 | 3.570035 | 3.626012  |
| ENSMUSG Spata19   | 0        | 0        | 0        | 0        | 0        | 0         |
| ENSMUSG Smpd5     | 1.732051 | 0.901998 | 1.848449 | 1.33473  | 1.330205 | 0.97232   |
| ENSMUSG Snx19     | 10.33479 | 10.35024 | 8.68107  | 8.482237 | 9.020372 | 9.148451  |
| ENSMUSG Rnpepl1   | 34.36984 | 33.41036 | 34.41242 | 30.62594 | 31.69481 | 33.250835 |
| ENSMUSG Ndufa10   | 24.17907 | 27.86023 | 23.55464 | 24.59818 | 27.21665 | 28.500534 |
| ENSMUSG Spc24     | 1.265096 | 1.859032 | 1.876739 | 2.65338  | 5.017985 | 4.334066  |
| ENSMUSG Zfp872    | 0.461783 | 0.461363 | 0.485963 | 0.59413  | 0.863847 | 0.933322  |
| ENSMUSG A230072l0 | 0        | 0        | 0        | 0        | 0        | 0         |
| ENSMUSG Eif2ak3   | 10.91622 | 10.49378 | 10.90191 | 12.55368 | 13.52593 | 13.907853 |
| ENSMUSG Gins3     | 1.217903 | 1.726665 | 1.624436 | 1.382718 | 1.969008 | 1.818915  |
| ENSMUSG Rbl2      | 15.0151  | 17.6877  | 14.69707 | 17.26866 | 16.96514 | 16.656057 |
| ENSMUSG Aktip     | 32.78135 | 34.3138  | 32.60209 | 24.23778 | 24.47605 | 24.593049 |
| ENSMUSG Sall1     | 0.799803 | 0.766535 | 0.532221 | 0.387992 | 0.520753 | 0.268146  |
| ENSMUSG Snx20     | 3.727648 | 2.813806 | 5.286986 | 7.895816 | 7.448739 | 8.352017  |
| ENSMUSG Brd7      | 20.29689 | 21.50638 | 19.52856 | 21.22608 | 19.55477 | 21.632788 |
| ENSMUSG Nkd1      | 71.08482 | 63.06461 | 75.47487 | 41.74814 | 49.40652 | 45.431219 |
| ENSMUSG As3mt     | 17.08139 | 15.62718 | 16.33794 | 16.48145 | 14.71987 | 15.225081 |
| ENSMUSG Slc38a1   | 5.347097 | 6.064339 | 3.946988 | 9.002188 | 8.767683 | 8.994263  |
| ENSMUSG Ssxb2     | 0        | 0        | 0        | 0        | 0        | 0         |
| ENSMUSG Cyp17a1   | 0        | 0        | 0        | 0        | 0        | 0         |
| ENSMUSG Plxnc1    | 6.166592 | 6.135769 | 6.637052 | 10.41628 | 10.68108 | 10.930662 |
| ENSMUSG Gnpda2    | 14.33654 | 11.76368 | 11.33267 | 12.07971 | 10.08396 | 11.400247 |
| ENSMUSG Guf1      | 3.937907 | 4.217551 | 3.800073 | 3.487709 | 3.146191 | 3.429341  |
| ENSMUSG Anapc15-1 | 0        | 0.074641 | 0.120245 | 0.649835 | 0.015441 | 0.388166  |
| ENSMUSG Cnga2     | 0.184656 | 0.255738 | 0.13387  | 0.084168 | 0.138191 | 0.06907   |
| ENSMUSG Chrna9    | 0        | 0        | 0        | 0        | 0.145667 | 0         |
| ENSMUSG Rhoh      | 1.937491 | 1.479055 | 1.741756 | 3.946868 | 2.998458 | 3.416408  |
| ENSMUSG Apbb2     | 10.70809 | 9.974652 | 11.03228 | 8.590871 | 8.347154 | 8.406082  |
| ENSMUSG Nsun7     | 0.140868 | 0.194434 | 0.133471 | 0.130936 | 0.149272 | 0.187432  |
| ENSMUSG Ugdh      | 14.14848 | 13.99595 | 14.31949 | 14.4284  | 13.7358  | 14.64082  |
| ENSMUSG Tob2      | 15.47146 | 16.54206 | 15.56598 | 13.33186 | 12.48884 | 12.927826 |
| ENSMUSG Kcnd1     | 0.084538 | 0.107377 | 0.064449 | 0.261962 | 0.19432  | 0.296781  |
| ENSMUSG Pds5a     | 19.10087 | 21.64658 | 16.5245  | 19.93773 | 19.96853 | 18.485261 |
| ENSMUSG Omg       | 0        | 0        | 0        | 0.023353 | 0.024983 | 0.019758  |
| ENSMUSG Tsn       | 8.051954 | 7.921267 | 7.957304 | 7.105497 | 7.394833 | 6.954445  |
| ENSMUSG Olfr103   | 0        | 0        | 0        | 0        | 0        | 0         |
| ENSMUSG Ube2u     | 0        | 0        | 0        | 0.096122 | 0.085512 | 0.025045  |
| ENSMUSG Dmrta1    | 0        | 0.022471 | 0.01843  | 0.023336 | 0.021603 | 0.040143  |

|                   |          |          |          |          |          |           |
|-------------------|----------|----------|----------|----------|----------|-----------|
| ENSMUSG Fam19a4   | 0        | 0.018038 | 0.020519 | 0.070083 | 0.025574 | 0.154582  |
| ENSMUSG Kcnk7     | 0.49242  | 0.33354  | 0.314725 | 0.766324 | 0.536169 | 0.34558   |
| ENSMUSG Serpinb1c | 0.032125 | 0.082399 | 0.070761 | 0.145068 | 0.037041 | 0.17866   |
| ENSMUSG H2-Oa     | 2.234256 | 1.416156 | 1.669798 | 4.876931 | 3.690949 | 3.673229  |
| ENSMUSG Fut1      | 0.051599 | 0.122371 | 0        | 1.196341 | 1.206603 | 0.778722  |
| ENSMUSG Eps15     | 37.77188 | 33.38155 | 31.71001 | 25.99309 | 26.746   | 25.593566 |
| ENSMUSG Angptl3   | 0        | 0.089546 | 0.135536 | 0.097341 | 0.032879 | 0.098556  |
| ENSMUSG Ncaph     | 2.32231  | 2.346818 | 2.006234 | 2.43684  | 4.11544  | 3.099762  |
| ENSMUSG Cdkn2c    | 11.01397 | 11.94525 | 12.02956 | 13.23997 | 12.82206 | 10.974353 |
| ENSMUSG Dock7     | 11.5982  | 11.31715 | 9.305173 | 9.683074 | 8.442016 | 9.026273  |
| ENSMUSG Rnf11     | 23.36052 | 24.83228 | 23.88215 | 19.10145 | 18.96438 | 17.974329 |
| ENSMUSG Pip5k1c   | 35.13798 | 34.03824 | 34.93719 | 37.37357 | 37.38897 | 39.02281  |
| ENSMUSG Cobll1    | 14.36693 | 14.12243 | 13.11183 | 9.001424 | 8.774409 | 9.237813  |
| ENSMUSG Calr4     | 0.100865 | 0.032222 | 0.046957 | 0.090289 | 0.045742 | 0         |
| ENSMUSG Osbp19    | 61.32656 | 61.16263 | 59.52419 | 48.92502 | 49.51741 | 49.264169 |
| ENSMUSG Sidt2     | 25.42775 | 24.71502 | 27.43704 | 28.18124 | 31.04973 | 30.893316 |
| ENSMUSG Ppil4     | 12.46501 | 13.94283 | 13.2364  | 12.87128 | 10.83808 | 10.360297 |
| Mus_musc Mus_musc | 1.035546 | 0.425133 | 0.196762 | 0.569891 | 0.520627 | 0.682961  |
| ENSMUSG Aph1a     | 46.18536 | 41.07535 | 46.99968 | 43.25576 | 42.57383 | 38.982798 |
| Mus_musc Mus_musc | 0        | 0        | 0        | 0        | 0        | 0         |
| Mus_musc Mus_musc | 0        | 0        | 0.168936 | 0        | 0        | 0         |
| Mus_musc Mus_musc | 13.5516  | 14.19765 | 11.45108 | 13.23102 | 12.32119 | 14.273009 |
| Mus_musc Mus_musc | 0        | 0        | 0        | 0.071838 | 0        | 0         |
| Mus_musc Mus_musc | 0.141443 | 0        | 0        | 0.0921   | 0        | 0         |
| Mus_musc Mus_musc | 0        | 0.149973 | 0.229251 | 0.063609 | 0.098438 | 0         |
| Mus_musc Mus_musc | 0.331592 | 0.516774 | 0.67948  | 0.271698 | 0.251351 | 0.303894  |
| Mus_musc Mus_musc | 0.03108  | 0.348152 | 0        | 0        | 0        | 0         |
| Mus_musc Mus_musc | 3.527599 | 4.586622 | 4.851555 | 2.742034 | 2.350384 | 2.011034  |
| Mus_musc Mus_musc | 0.501557 | 0.406862 | 0.780185 | 0.515076 | 0.71755  | 0.648246  |
| Mus_musc Mus_musc | 0.199847 | 0.172185 | 0.221027 | 0.26154  | 0.283696 | 0.081582  |
| Mus_musc Mus_musc | 0.248423 | 0        | 0.071081 | 0.749991 | 0.185907 | 0.178751  |
| ENSMUSG Psg22     | 0        | 0        | 0        | 0        | 0        | 0         |
| ENSMUSG Cxcl12    | 82.19589 | 76.44526 | 68.37725 | 67.34377 | 66.01037 | 75.547642 |
| ENSMUSG 4930503L1 | 5.962615 | 5.582621 | 6.494453 | 5.323488 | 4.7077   | 4.601151  |
| ENSMUSG Tnfrsf26  | 1.483191 | 0.859257 | 1.173201 | 2.487025 | 2.045203 | 2.387089  |
| ENSMUSG Ifne      | 0        | 0        | 0        | 0        | 0        | 0         |
| ENSMUSG Myd88     | 21.74851 | 21.7306  | 26.57152 | 22.51035 | 20.95945 | 21.815357 |
| ENSMUSG Fbxl2     | 2.001639 | 1.583821 | 2.298562 | 2.173836 | 2.154875 | 2.296051  |
| ENSMUSG Pcd6ip    | 38.04205 | 37.75316 | 41.82444 | 37.94777 | 34.9102  | 35.718011 |
| ENSMUSG Stac      | 0.135405 | 0.164172 | 0.20165  | 0.088653 | 0.317674 | 0.290421  |
| ENSMUSG Arpp21    | 0        | 0        | 0.073867 | 0        | 0        | 0         |
| ENSMUSG Dclk3     | 1.188822 | 0.698423 | 1.288468 | 0.422271 | 0.595365 | 0.674839  |
| ENSMUSG Trib1     | 14.07902 | 11.24864 | 11.59118 | 9.924643 | 9.554554 | 9.363205  |
| ENSMUSG Plau      | 6.900418 | 6.15939  | 7.231759 | 8.748249 | 10.33002 | 9.630063  |
| ENSMUSG Serpina9  | 0.038807 | 0.084738 | 0.059277 | 0.165781 | 0        | 0.068857  |
| ENSMUSG Mrps14    | 8.873176 | 8.252957 | 8.964253 | 8.081919 | 7.538615 | 8.472814  |
| ENSMUSG Ring1     | 12.94389 | 12.98117 | 14.4403  | 13.61184 | 12.06772 | 12.279627 |
| ENSMUSG Slc39a7   | 51.1628  | 48.02243 | 57.94281 | 54.30746 | 54.38037 | 57.506421 |
| ENSMUSG Ccdc158   | 0.385676 | 0.353955 | 0.301848 | 0.332876 | 0.450086 | 0.342452  |
| ENSMUSG Tdrp      | 9.093384 | 8.255389 | 8.590691 | 4.97232  | 4.178299 | 5.999793  |
| ENSMUSG Gm11114   | 0        | 0        | 0        | 0        | 0        | 0         |
| ENSMUSG Olfr1425  | 0        | 0        | 0        | 0        | 0        | 0.022157  |
| ENSMUSG Kcnj13    | 8.214108 | 8.070348 | 5.817287 | 6.953669 | 5.339624 | 6.431598  |
| ENSMUSG Rpl36a    | 176.273  | 168.9284 | 179.1052 | 202.7021 | 176.0558 | 179.25503 |
| ENSMUSG Neu2      | 1.674788 | 1.633006 | 1.522934 | 0.980701 | 1.203901 | 1.24705   |
| ENSMUSG Gm11116   | 0        | 0        | 0        | 0        | 0        | 0         |
| ENSMUSG Gm11115   | 0        | 0        | 0        | 0        | 0        | 0         |
| Mus_musc Mus_musc | 0.705931 | 1.204964 | 0.543485 | 0.781733 | 0.64611  | 0.723281  |
| Mus_musc Mus_musc | 5.765647 | 3.496547 | 2.993026 | 2.31134  | 1.844299 | 3.78727   |
| ENSMUSG Adgrd1    | 2.330094 | 2.808877 | 1.529499 | 2.013734 | 1.255084 | 2.670757  |
| ENSMUSG Mrpl50    | 9.061265 | 10.50361 | 10.05969 | 9.619948 | 9.362347 | 8.98104   |
| Mus_musc Mus_musc | 0.519402 | 0.68876  | 0.59733  | 0.652481 | 0.444331 | 0.411394  |
| Mus_musc Mus_musc | 0        | 0        | 0        | 0        | 0        | 0         |
| ENSMUSG Vwf       | 55.00363 | 43.97473 | 48.49605 | 58.88587 | 73.5453  | 68.239553 |

|          |          |          |          |          |          |          |           |
|----------|----------|----------|----------|----------|----------|----------|-----------|
| Mus_musc | Mus_musc | 0.060196 | 0.026184 | 0.363194 | 0.311169 | 0.46109  | 0.390289  |
| Mus_musc | Mus_musc | 1.636923 | 1.886358 | 1.423192 | 1.596214 | 1.923605 | 1.743542  |
| Mus_musc | Mus_musc | 0.117909 | 0.174983 | 0.131836 | 0.026198 | 0.229498 | 0.144245  |
| Mus_musc | Mus_musc | 0.13915  | 0        | 0        | 0        | 0        | 0.180342  |
| Mus_musc | Mus_musc | 0        | 0        | 0.142165 | 0        | 0.094876 | 0         |
| Mus_musc | Mus_musc | 0        | 0.076019 | 0.071554 | 0.306253 | 0.333847 | 0.253856  |
| Mus_musc | Mus_musc | 12.23271 | 9.149001 | 11.84819 | 8.970043 | 7.693388 | 7.678692  |
| ENSMUSG  | Defb39   | 0        | 0        | 0        | 0        | 0        | 0         |
| ENSMUSG  | Defa35   | 0        | 0        | 0        | 0        | 0        | 0         |
| ENSMUSG  | Fam104a  | 13.02697 | 9.744456 | 12.03961 | 8.393943 | 9.832195 | 9.789817  |
| ENSMUSG  | Oifr1126 | 0        | 0        | 0        | 0        | 0        | 0         |
| ENSMUSG  | Zfp846   | 1.313439 | 1.067248 | 1.219534 | 0.88906  | 1.249888 | 1.323831  |
| ENSMUSG  | Mmp1b    | 0        | 0        | 0        | 0        | 0        | 0         |
| ENSMUSG  | D11Wsu47 | 4.605268 | 4.237042 | 5.041829 | 4.937454 | 3.771973 | 3.892047  |
| ENSMUSG  | Ggact    | 12.24835 | 10.97114 | 11.2562  | 10.46523 | 8.888267 | 11.351072 |
| ENSMUSG  | Gucy1a2  | 2.754329 | 2.760505 | 1.785767 | 2.255615 | 1.716771 | 1.831598  |
| ENSMUSG  | Prkacb   | 27.80359 | 26.26094 | 26.94716 | 20.65188 | 21.30348 | 21.220718 |
| ENSMUSG  | Apoh     | 0        | 0.117475 | 0        | 0        | 0.088169 | 0.090081  |
| ENSMUSG  | Oifr26   | 0        | 0        | 0        | 0        | 0        | 0         |
| ENSMUSG  | Vmn2r45  | 0        | 0        | 0        | 0        | 0        | 0         |
| ENSMUSG  | Msl3l2   | 8.178928 | 5.400896 | 6.838914 | 6.000142 | 4.886716 | 6.263107  |
| ENSMUSG  | Dkk4     | 0        | 0        | 0        | 0        | 0        | 0         |
| ENSMUSG  | Lgals3   | 84.40797 | 80.48976 | 93.67986 | 306.5415 | 332.1067 | 396.87328 |
| ENSMUSG  | Fam205c  | 0.354849 | 0.213329 | 0.059    | 0.095893 | 0.079189 | 0.045852  |
| ENSMUSG  | Ocstamp  | 0.015425 | 0.07072  | 0.013674 | 1.691054 | 2.668062 | 2.401523  |
| ENSMUSG  | Actl6a   | 17.30665 | 17.81783 | 18.04028 | 19.02356 | 16.52643 | 18.641011 |
| ENSMUSG  | Ccdc39   | 2.975327 | 3.812654 | 1.976927 | 4.347291 | 3.760256 | 3.965739  |
| ENSMUSG  | Ttc14    | 6.588565 | 6.858732 | 6.336619 | 6.538505 | 7.316861 | 6.144028  |
| ENSMUSG  | Pex5l    | 0.287519 | 0.222809 | 0.162514 | 0.115763 | 0.149718 | 0.095465  |
| ENSMUSG  | Ncoa3    | 15.92267 | 14.73696 | 14.51438 | 14.14103 | 13.8044  | 16.080277 |
| ENSMUSG  | Dnajc19  | 12.97146 | 11.42466 | 11.19761 | 14.75869 | 10.31462 | 10.248602 |
| ENSMUSG  | Rapgef5  | 78.66859 | 79.97316 | 74.31441 | 50.34798 | 56.23807 | 48.34016  |
| ENSMUSG  | Hrrr     | 0        | 0        | 0        | 0        | 0        | 0         |
| ENSMUSG  | Tik1     | 23.28591 | 23.08636 | 21.33824 | 20.17685 | 20.8425  | 19.823502 |
| ENSMUSG  | Zbed3    | 8.518276 | 10.51392 | 9.90946  | 9.454707 | 10.40363 | 9.219454  |
| ENSMUSG  | Oifr1122 | 0        | 0        | 0        | 0        | 0        | 0         |
| ENSMUSG  | Mafa     | 0.125423 | 0.346985 | 0.137604 | 0.247142 | 0.142797 | 0.418538  |
| ENSMUSG  | Nxpe5    | 0.045211 | 0.143282 | 0.062277 | 1.400997 | 0.982116 | 1.598424  |
| ENSMUSG  | Ap3m2    | 7.408169 | 7.396838 | 6.793429 | 7.014165 | 6.174848 | 5.859583  |
| ENSMUSG  | Gpx6     | 0        | 0.034317 | 0        | 0        | 0        | 0.050033  |
| ENSMUSG  | Gpx5     | 0        | 0        | 0        | 0        | 0        | 0         |
| ENSMUSG  | Pde1c    | 0.259713 | 0.311972 | 0.154489 | 0.200104 | 0.075456 | 0.133969  |
| ENSMUSG  | Sox1     | 0        | 0.009549 | 0.010489 | 0        | 0        | 0         |
| Mus_musc | Mus_musc | 1.826342 | 0.850415 | 1.125615 | 0.667062 | 0.301819 | 0.54676   |
| ENSMUSG  | Esp38    | 0        | 0        | 0        | 0        | 0        | 0         |
| ENSMUSG  | Gm10096  | 0        | 0        | 0        | 0        | 0        | 0         |
| Mus_musc | Mus_musc | 0        | 0.154309 | 0        | 0.158522 | 0        | 0.097139  |
| Mus_musc | Mus_musc | 0        | 0        | 1.143232 | 0.588555 | 0        | 0         |
| Mus_musc | Mus_musc | 0.228597 | 0.230731 | 0        | 0.203531 | 0.172253 | 0.437602  |
| Mus_musc | Mus_musc | 0.119333 | 0.171077 | 0.332285 | 0        | 0.032046 | 0.390707  |
| Mus_musc | Mus_musc | 0.286264 | 0.549388 | 0.420049 | 0.451646 | 0.397029 | 0.300335  |
| ENSMUSG  | Arhgap24 | 8.16317  | 11.44301 | 8.240154 | 7.521781 | 8.017121 | 6.128054  |
| ENSMUSG  | Oifr743  | 0        | 0        | 0        | 0        | 0        | 0         |
| ENSMUSG  | Vmn1r112 | 0        | 0        | 0        | 0        | 0        | 0         |
| ENSMUSG  | Ctdp1    | 9.534556 | 9.787292 | 8.474118 | 7.259304 | 7.557596 | 7.622709  |
| ENSMUSG  | Cfap73   | 0.8094   | 1.373195 | 0.966635 | 2.478825 | 1.321441 | 1.636221  |
| ENSMUSG  | Zfp953   | 1.408608 | 1.305708 | 0.9721   | 1.403577 | 1.215513 | 0.915221  |
| Mus_musc | Mus_musc | 0        | 0        | 0        | 0.239756 | 0        | 0         |
| Mus_musc | Mus_musc | 0        | 0        | 0        | 0        | 0        | 0         |
| Mus_musc | Mus_musc | 0        | 0.295725 | 0        | 0.11101  | 0.148314 | 0.066932  |
| Mus_musc | Mus_musc | 0.417417 | 0.358995 | 0        | 0        | 0        | 0         |
| Mus_musc | Mus_musc | 0.152545 | 0.28591  | 0.211707 | 0.364945 | 0.422123 | 0.188748  |
| ENSMUSG  | Vmn1r232 | 0        | 0        | 0        | 0        | 0        | 0         |
| Mus_musc | Mus_musc | 5.37043  | 5.332692 | 4.585191 | 4.433835 | 4.089917 | 4.035687  |

|                    |          |          |          |          |          |           |
|--------------------|----------|----------|----------|----------|----------|-----------|
| ENSMUSG Ndufa11    | 45.93181 | 46.03288 | 45.74224 | 48.64139 | 47.54034 | 51.844591 |
| Mus_musc Mus_musc  | 0        | 0        | 0        | 0        | 0        | 0.33212   |
| ENSMUSG Olfr896-ps | 0        | 0        | 0        | 0        | 0        | 0         |
| ENSMUSG Tnp01      | 19.99371 | 21.27128 | 18.70867 | 20.2651  | 20.9916  | 21.156983 |
| ENSMUSG Myod1      | 0        | 0        | 0        | 0        | 0        | 0         |
| ENSMUSG Shisa3     | 0.14047  | 0.333389 | 0.129713 | 0.332696 | 0.408783 | 0.498364  |
| Mus_musc Mus_musc  | 8.924316 | 7.663479 | 6.097344 | 7.33828  | 6.38492  | 6.822071  |
| Mus_musc Mus_musc  | 1.299105 | 2.038844 | 2.294849 | 1.407271 | 1.840126 | 1.606893  |
| Mus_musc Mus_musc  | 0        | 0        | 0.102124 | 0.42016  | 0.513    | 0.126218  |
| Mus_musc Mus_musc  | 0.283647 | 0.487431 | 0.699376 | 0.302308 | 0.503258 | 0.343304  |
| Mus_musc Mus_musc  | 0        | 0        | 0.108303 | 0        | 0.101664 | 0         |
| ENSMUSG Pcdha12    | 0.089728 | 0.040634 | 0.080462 | 0.063901 | 0.017058 | 0.081668  |
| ENSMUSG Olfr205    | 0        | 0        | 0        | 0        | 0        | 0         |
| ENSMUSG Olfr478    | 0        | 0        | 0        | 0        | 0        | 0         |
| ENSMUSG Gm19965    | 0        | 0        | 0        | 0        | 0        | 0         |
| ENSMUSG Orm2       | 0.178327 | 0        | 0.232151 | 2.058555 | 1.148579 | 1.128883  |
| ENSMUSG Eif4e3     | 19.83391 | 20.72348 | 22.36477 | 16.73875 | 15.31496 | 15.41001  |
| ENSMUSG Zfp229     | 3.539099 | 3.206575 | 2.758693 | 3.075603 | 2.778711 | 2.430642  |
| Mus_musc Mus_musc  | 0        | 0        | 0        | 0        | 0        | 0.184186  |
| ENSMUSG Map7d3     | 0.635931 | 0.610939 | 0.51423  | 0.413401 | 0.602246 | 0.408319  |
| ENSMUSG Vxn        | 0.130571 | 0.117154 | 0.076582 | 0.014056 | 0.066283 | 0.059962  |
| Mus_musc Mus_musc  | 0.29227  | 0.23669  | 0.155987 | 0.092592 | 0.24493  | 0.23327   |
| Mus_musc Mus_musc  | 0.320872 | 0.205225 | 0.078313 | 0.174721 | 0.081442 | 0.217929  |
| Mus_musc Mus_musc  | 0        | 0        | 0        | 0        | 0        | 0         |
| Mus_musc Mus_musc  | 0.067129 | 0        | 0.266509 | 0        | 0        | 0.103282  |
| ENSMUSG Htatsf1    | 16.1408  | 15.83046 | 16.02711 | 13.26672 | 11.92827 | 12.535149 |
| ENSMUSG Eif3k      | 103.6354 | 91.85677 | 100.4881 | 101.6215 | 104.5721 | 107.65198 |
| ENSMUSG Gapdhs     | 0.775969 | 1.208266 | 0.932893 | 0.836443 | 0.839329 | 0.938412  |
| ENSMUSG Gm14569    | 0.094651 | 0.08393  | 0.108776 | 0.061465 | 0.035962 | 0.049202  |
| ENSMUSG Il13ra2    | 0        | 0        | 0        | 0.278838 | 0.678755 | 0.342937  |
| ENSMUSG Gm14137    | 0.265525 | 0.426501 | 0.324928 | 0.419693 | 0.257668 | 0.285978  |
| ENSMUSG Aasdh      | 3.074383 | 2.576122 | 2.544102 | 2.901989 | 1.883482 | 1.915049  |
| ENSMUSG Ccr10      | 0.509422 | 0.297097 | 0.584807 | 1.60113  | 2.014352 | 2.007801  |
| ENSMUSG Slc7a8     | 4.33743  | 3.817039 | 2.99053  | 8.156346 | 10.12203 | 10.814989 |
| ENSMUSG Aaas       | 5.375454 | 6.965016 | 6.007592 | 6.341106 | 7.495528 | 8.538189  |
| ENSMUSG Pon1       | 43.2232  | 41.13658 | 28.13348 | 5.558628 | 5.219612 | 5.679502  |
| ENSMUSG Mien1      | 24.16149 | 26.44148 | 27.55076 | 30.75799 | 31.6092  | 34.484295 |
| ENSMUSG Cenpt      | 4.730327 | 4.533307 | 4.919101 | 3.928103 | 4.452636 | 4.267242  |
| ENSMUSG Tmtc3      | 9.647108 | 11.08739 | 9.638573 | 8.311527 | 8.582954 | 7.554406  |
| ENSMUSG Ctdsp2     | 84.88783 | 79.91563 | 82.15502 | 62.90285 | 60.6278  | 54.968902 |
| ENSMUSG Psen2      | 17.13552 | 12.25968 | 15.16343 | 14.51586 | 14.72921 | 15.30339  |
| ENSMUSG Rbm25      | 22.19755 | 24.25696 | 24.22661 | 22.97719 | 20.80503 | 23.030637 |
| ENSMUSG Tnk1       | 6.024089 | 4.696501 | 5.321736 | 4.071499 | 3.788643 | 4.212656  |
| ENSMUSG Adam39     | 0        | 0        | 0        | 0        | 0        | 0         |
| ENSMUSG Pigyl      | 21.5746  | 21.42597 | 24.12804 | 23.86522 | 18.30906 | 19.445014 |
| ENSMUSG Olfr141    | 0        | 0        | 0        | 0        | 0        | 0         |
| ENSMUSG Apol7a     | 0.311183 | 0.517527 | 0.178443 | 0.463584 | 0.227976 | 0.438888  |
| ENSMUSG Tceal5     | 0.426673 | 0.173376 | 0.103886 | 0.342032 | 0.053647 | 0.08186   |
| ENSMUSG Ecsit      | 9.303628 | 8.281441 | 8.533711 | 7.985275 | 7.483954 | 8.148546  |
| ENSMUSG Zfp772     | 0.891677 | 1.311629 | 1.531376 | 1.583785 | 1.622079 | 0.97492   |
| ENSMUSG Zcwpw1     | 0.513224 | 0.552934 | 0.746549 | 0.47022  | 0.672972 | 0.637006  |
| ENSMUSG Myh14      | 115.4485 | 118.3195 | 98.14087 | 72.26256 | 75.48447 | 68.900726 |
| ENSMUSG Eif3c      | 57.13015 | 53.84817 | 53.43945 | 53.88372 | 53.84477 | 57.469417 |
| ENSMUSG Slco2b1    | 6.321761 | 5.858918 | 5.22938  | 7.175027 | 8.114863 | 7.837996  |
| ENSMUSG Rmnd5b     | 15.12212 | 16.73442 | 14.85401 | 13.55416 | 13.72255 | 14.509393 |
| ENSMUSG Sh2b1      | 16.48799 | 15.17866 | 16.11711 | 15.49115 | 15.25659 | 15.957586 |
| ENSMUSG N4bp3      | 21.52868 | 23.03756 | 20.8881  | 12.77029 | 14.77448 | 13.681311 |
| ENSMUSG Syt3       | 0.426805 | 0.627029 | 0.523946 | 0.528468 | 0.361681 | 0.381412  |
| ENSMUSG Fer1l6     | 0.051039 | 0.014124 | 0.008219 | 3.594177 | 2.85967  | 3.538703  |
| ENSMUSG Rbm15      | 4.449976 | 5.14241  | 3.817304 | 4.322356 | 4.380113 | 5.171295  |
| ENSMUSG Tmem72     | 0        | 0        | 0        | 0        | 0        | 0         |
| ENSMUSG Olfr19     | 0        | 0        | 0        | 0        | 0        | 0         |
| ENSMUSG Taf13      | 8.94831  | 8.548279 | 8.89342  | 7.661768 | 6.299319 | 7.137725  |
| ENSMUSG Gm17727    | 0        | 0        | 0        | 0        | 0        | 0         |

|                   |          |          |          |          |          |           |
|-------------------|----------|----------|----------|----------|----------|-----------|
| ENSMUSG Tmem246   | 12.24098 | 11.13556 | 9.681674 | 7.601477 | 9.96085  | 8.469092  |
| ENSMUSG Gabra5    | 0        | 0        | 0        | 0        | 0        | 0         |
| ENSMUSG Stub1     | 43.66446 | 41.28427 | 41.24201 | 37.3937  | 34.12325 | 38.33342  |
| ENSMUSG Angpt2    | 3.161675 | 3.07186  | 3.960485 | 4.541039 | 4.924797 | 3.968929  |
| ENSMUSG Rps27     | 390.6531 | 380.8839 | 401.7679 | 471.6109 | 255.2874 | 357.33134 |
| ENSMUSG Agpat5    | 1.730643 | 1.917894 | 1.788013 | 1.675618 | 1.881948 | 1.863128  |
| ENSMUSG Myom2     | 0.18503  | 1.93405  | 0.258847 | 0.554006 | 0.309302 | 0.224     |
| ENSMUSG Gm9964    | 0        | 0        | 0        | 0        | 0        | 0         |
| ENSMUSG Tmem176a  | 120.3206 | 122.0251 | 120.6228 | 154.0686 | 163.151  | 152.22102 |
| ENSMUSG Gm10198   | 0        | 0        | 0        | 0        | 0        | 0         |
| ENSMUSG Gm17732   | 0        | 0        | 0        | 0        | 0        | 0         |
| ENSMUSG Lama5     | 18.24962 | 17.04466 | 17.22329 | 15.12037 | 15.19836 | 16.818665 |
| ENSMUSG Frk       | 1.90342  | 2.405895 | 1.779976 | 2.659665 | 2.75471  | 2.94519   |
| ENSMUSG Hdac2     | 27.47447 | 27.71533 | 26.25793 | 26.04511 | 25.60995 | 24.08903  |
| ENSMUSG Mtrf1l    | 2.496684 | 1.845391 | 1.925272 | 1.93872  | 1.912154 | 2.099495  |
| ENSMUSG Rgs17     | 0.146329 | 0.243869 | 0.140852 | 0.096133 | 0.044901 | 0.056598  |
| ENSMUSG Vip       | 0        | 0.148661 | 0.027494 | 0.112371 | 0.107989 | 0.052487  |
| ENSMUSG Fbxo5     | 1.363809 | 1.832144 | 1.401648 | 2.72111  | 2.27322  | 2.482811  |
| ENSMUSG Tubal3    | 0        | 0        | 0        | 0        | 0        | 0.017847  |
| ENSMUSG Tshz3     | 2.20747  | 2.844733 | 2.545475 | 1.682133 | 1.55063  | 1.657351  |
| ENSMUSG Akr1c18   | 0        | 0.075354 | 0        | 0.192578 | 0.582636 | 0.367452  |
| ENSMUSG Lrrc30    | 0        | 0        | 0        | 0        | 0        | 0         |
| ENSMUSG Dmtn      | 9.07843  | 8.546065 | 6.796181 | 6.355033 | 5.410259 | 5.380643  |
| ENSMUSG Akr1c13   | 4.509804 | 4.809765 | 4.28756  | 4.877867 | 5.340895 | 5.054026  |
| ENSMUSG Akr1c6    | 0        | 0        | 0        | 0        | 0        | 0         |
| ENSMUSG Akr1c12   | 0.247826 | 0.489727 | 0.292593 | 0.587253 | 0.267676 | 0.399776  |
| ENSMUSG Fam160b2  | 6.226477 | 6.101271 | 7.005698 | 7.112204 | 6.642799 | 6.706083  |
| ENSMUSG Slc39a14  | 3.218096 | 3.444428 | 3.430056 | 4.369992 | 4.81624  | 5.086084  |
| ENSMUSG Sftpc     | 15872.04 | 16090.47 | 15207.63 | 13046.89 | 11967.14 | 13828.374 |
| ENSMUSG Hr        | 2.494033 | 2.578475 | 2.152051 | 3.041381 | 3.475625 | 3.88864   |
| ENSMUSG Sorbs3    | 80.46804 | 73.82586 | 72.32305 | 39.88093 | 40.71227 | 36.62914  |
| ENSMUSG Pdlim2    | 120.2417 | 107.5223 | 116.186  | 67.25346 | 65.03751 | 65.874691 |
| ENSMUSG Gdi2      | 62.5621  | 63.53322 | 62.66354 | 74.04811 | 74.4176  | 72.735717 |
| ENSMUSG Rgs6      | 5.144452 | 4.381926 | 3.818641 | 2.681841 | 2.24082  | 2.277823  |
| ENSMUSG Slc36a1   | 5.339616 | 4.936148 | 5.074066 | 7.542259 | 7.976936 | 8.467276  |
| ENSMUSG Pggghg    | 6.816237 | 6.783241 | 6.405199 | 5.804999 | 5.223174 | 5.238365  |
| ENSMUSG Olfr285   | 0        | 0        | 0        | 0        | 0        | 0         |
| ENSMUSG Mlkl      | 3.326346 | 2.665855 | 4.306071 | 3.747934 | 3.133282 | 3.703931  |
| ENSMUSG Cyp4a32   | 1.202058 | 1.150966 | 0.953775 | 0.433448 | 0.515417 | 0.450955  |
| ENSMUSG Ptafr     | 2.299753 | 2.333774 | 3.131473 | 13.91144 | 12.81984 | 16.913507 |
| ENSMUSG Pex10     | 8.8509   | 7.871555 | 7.753349 | 5.68506  | 6.09869  | 7.10901   |
| ENSMUSG Morn1     | 3.005575 | 3.614726 | 2.566477 | 3.656088 | 3.642534 | 3.131903  |
| ENSMUSG Rer1      | 42.78416 | 44.35664 | 40.68152 | 39.1099  | 40.38067 | 39.718056 |
| Mus_musc Mus_musc | 0.137088 | 0.151893 | 0.190985 | 0.584314 | 0.450705 | 0.311276  |
| Mus_musc Mus_musc | 0.168802 | 0.165649 | 0.243553 | 0.191334 | 0.522647 | 0.601665  |
| Mus_musc Mus_musc | 0        | 0        | 0        | 0.174016 | 0        | 0         |
| Mus_musc Mus_musc | 0.615316 | 0.276623 | 0.347146 | 0.563042 | 0.38518  | 0.307893  |
| Mus_musc Mus_musc | 0        | 0        | 0.184967 | 0.128607 | 0        | 0         |
| Mus_musc Mus_musc | 0        | 0        | 0.298602 | 0        | 0        | 0.101787  |
| ENSMUSG Gm49388   | 0        | 0        | 0        | 0        | 0        | 0         |
| ENSMUSG Khdrbs1   | 23.9041  | 19.46853 | 18.34669 | 17.72505 | 17.57389 | 18.220796 |
| ENSMUSG Ak2       | 16.32636 | 15.67593 | 17.80767 | 24.89059 | 26.75667 | 27.690698 |
| ENSMUSG Rnf19b    | 21.26039 | 20.15718 | 29.63113 | 32.05358 | 31.521   | 32.685367 |
| ENSMUSG A3galt2   | 0.228799 | 0.198053 | 0.206112 | 0.127047 | 0.151722 | 0.101982  |
| ENSMUSG Ccdc28b   | 11.07982 | 10.7417  | 10.7884  | 10.91505 | 8.969862 | 10.647965 |
| ENSMUSG Phc2      | 52.50202 | 49.44006 | 52.11963 | 41.16063 | 35.84461 | 40.843844 |
| ENSMUSG Tmem234   | 62.71879 | 58.49199 | 60.22018 | 61.54116 | 55.66835 | 56.248517 |
| ENSMUSG Eif3i     | 54.21466 | 56.65018 | 60.12035 | 55.51525 | 57.83633 | 61.884496 |
| ENSMUSG Zfp362    | 15.97954 | 14.38263 | 14.23985 | 13.32288 | 14.27229 | 13.952763 |
| ENSMUSG Gpt       | 13.40835 | 14.7605  | 13.4768  | 15.17344 | 12.55593 | 15.568317 |
| ENSMUSG Ercc4     | 5.837693 | 5.43708  | 5.510194 | 4.483205 | 4.740694 | 5.834369  |
| ENSMUSG Eef2kmt   | 6.656918 | 9.574812 | 7.505429 | 8.750558 | 8.3789   | 9.56435   |
| ENSMUSG 12-Sep    | 0        | 0.03055  | 0        | 0        | 0        | 0         |
| ENSMUSG Rogdi     | 16.20138 | 13.69078 | 16.00188 | 18.53066 | 17.48734 | 19.652796 |



|                    |          |          |          |          |          |           |
|--------------------|----------|----------|----------|----------|----------|-----------|
| ENSMUSG Apod       | 4.700255 | 3.293002 | 3.730177 | 2.850776 | 3.12131  | 2.534053  |
| ENSMUSG Frmpd1     | 0.224518 | 0.242083 | 0.153174 | 0.201342 | 0.177573 | 0.267546  |
| ENSMUSG Togaram1   | 10.32403 | 11.01708 | 8.836096 | 8.941962 | 8.497926 | 9.261522  |
| ENSMUSG Primpol    | 2.852866 | 1.903305 | 2.277728 | 2.807639 | 2.491991 | 3.153796  |
| ENSMUSG Serpinf2   | 0.109199 | 0.062512 | 0.124467 | 0.168619 | 0.035601 | 0.234602  |
| ENSMUSG Hoxa9      | 0        | 0.013106 | 0        | 0        | 0.017824 | 0.026149  |
| ENSMUSG Dntt       | 0.023681 | 0        | 0        | 0        | 0.050007 | 0.025966  |
| ENSMUSG Tm9sf3     | 51.81759 | 52.10778 | 48.96301 | 49.61604 | 50.33155 | 49.13047  |
| ENSMUSG Pik3ap1    | 20.11002 | 19.98202 | 20.52079 | 16.33559 | 16.89469 | 16.399231 |
| ENSMUSG Ccnj       | 5.477971 | 6.151056 | 5.932435 | 5.27405  | 5.629918 | 5.973844  |
| ENSMUSG Tll2       | 0        | 0        | 0        | 0.017665 | 0        | 0         |
| ENSMUSG Lcor       | 3.527772 | 4.437613 | 2.66713  | 3.079788 | 3.87968  | 3.238283  |
| Mus_musc Mus_musc  | 0.415246 | 0.444595 | 0.39261  | 0.340957 | 0.436604 | 0.214962  |
| Mus_musc Mus_musc  | 0.694709 | 0.698858 | 0.430775 | 0.420686 | 0.492533 | 0.505779  |
| Mus_musc Mus_musc  | 0.143988 | 0.139017 | 0        | 0        | 0        | 0.331867  |
| Mus_musc Mus_musc  | 2.00477  | 1.288087 | 1.373594 | 0.779562 | 0.852594 | 0.335712  |
| Mus_musc Mus_musc  | 0.431866 | 0.35964  | 0.258854 | 0.625335 | 0.339057 | 0.443235  |
| ENSMUSG Gm17728    | 0.568807 | 0.800165 | 0.676592 | 0.741858 | 1.012069 | 1.443485  |
| ENSMUSG Armcx5     | 3.16978  | 2.036638 | 2.124072 | 2.133736 | 2.033197 | 1.712869  |
| ENSMUSG Bhlhb9     | 4.513165 | 5.598383 | 4.912343 | 4.466044 | 4.605945 | 4.16007   |
| ENSMUSG Gm17174    | 0        | 0        | 0        | 0        | 0        | 0         |
| ENSMUSG Gprasp2    | 0.814343 | 0.971092 | 0.580425 | 0.489974 | 0.523137 | 0.370787  |
| ENSMUSG Gm10447    | 0        | 0.012727 | 0.011716 | 0.040329 | 0.024277 | 0         |
| ENSMUSG Tsg101     | 29.4517  | 31.23983 | 29.44521 | 26.70385 | 23.78284 | 25.657868 |
| Mus_musc Mus_musc  | 1.499808 | 1.360232 | 1.831267 | 1.741218 | 1.71387  | 1.504528  |
| ENSMUSG 4933402J0  | 0        | 0        | 0.054671 | 0        | 0        | 0         |
| ENSMUSG Olfr1192-f | 0        | 0        | 0        | 0        | 0        | 0         |
| ENSMUSG Gsta4      | 58.22258 | 63.70966 | 42.79661 | 49.54892 | 42.59911 | 44.475513 |
| ENSMUSG Elovl5     | 105.74   | 102.4972 | 99.24493 | 75.8551  | 74.73638 | 72.338644 |
| ENSMUSG Cgas       | 1.007108 | 0.831708 | 1.027004 | 1.001515 | 1.132096 | 1.352397  |
| ENSMUSG Ooep       | 0.100436 | 0.061709 | 0        | 0.066986 | 0.076668 | 0.082358  |
| ENSMUSG Lrrc15     | 0.042493 | 0.008718 | 0.009544 | 0.024579 | 0.078861 | 0.01821   |
| ENSMUSG Neo1       | 11.93788 | 11.79888 | 11.02404 | 9.748271 | 9.259326 | 9.756107  |
| ENSMUSG Slc39a1    | 38.02741 | 37.33765 | 37.73508 | 42.33632 | 41.98994 | 43.740337 |
| ENSMUSG Mto1       | 5.173709 | 5.624377 | 5.459434 | 5.104872 | 5.914056 | 5.136178  |
| ENSMUSG Impg1      | 0.076927 | 0.009196 | 0        | 0.03863  | 0        | 0         |
| ENSMUSG Bank1      | 1.824494 | 1.812486 | 1.016936 | 3.885219 | 3.241243 | 3.420516  |
| ENSMUSG Ddx60      | 1.521437 | 1.31471  | 1.830653 | 1.50548  | 1.133543 | 1.176419  |
| ENSMUSG Ssh2       | 20.54453 | 21.83122 | 18.34461 | 15.55586 | 16.98857 | 14.730255 |
| ENSMUSG Olfr16     | 0        | 0        | 0        | 0        | 0        | 0         |
| ENSMUSG Mapt       | 38.68567 | 39.15592 | 45.64091 | 23.94461 | 23.78145 | 22.857293 |
| ENSMUSG Kansl1     | 15.78836 | 16.88007 | 15.48309 | 13.86558 | 13.81069 | 14.141872 |
| ENSMUSG Gid4       | 21.357   | 21.64638 | 19.00047 | 14.03877 | 14.30121 | 12.342902 |
| ENSMUSG Myo1b      | 79.52632 | 73.92599 | 72.66362 | 45.24156 | 44.22374 | 42.841309 |
| ENSMUSG Zfp946     | 3.257478 | 3.340228 | 3.51875  | 3.365296 | 3.11344  | 3.273619  |
| ENSMUSG Zfp942     | 3.690539 | 4.313486 | 3.885746 | 3.623751 | 3.875301 | 3.185559  |
| ENSMUSG Zfp957     | 0.057551 | 0.055082 | 0.046057 | 0.05731  | 0.015201 | 0         |
| ENSMUSG Mro        | 0        | 0        | 0        | 0        | 0        | 0         |
| ENSMUSG Aph1c      | 2.054036 | 2.072602 | 1.848354 | 3.172268 | 3.201827 | 3.345038  |
| ENSMUSG Brsk2      | 0.067485 | 0.034916 | 0        | 0        | 0.078779 | 0.010162  |
| ENSMUSG Cd8b1      | 2.805637 | 2.109344 | 2.309349 | 3.638547 | 2.635366 | 4.349122  |
| ENSMUSG Gm20815    | 0        | 0        | 0        | 0        | 0        | 0         |
| ENSMUSG Asrgl1     | 4.575618 | 4.286476 | 4.144332 | 4.176263 | 3.928957 | 4.358531  |
| ENSMUSG Acap2      | 40.8146  | 37.3056  | 34.85899 | 22.77639 | 26.1231  | 24.975016 |
| ENSMUSG G6pc2      | 0        | 0        | 0        | 0        | 0.075045 | 0         |
| ENSMUSG Slc22a6    | 0        | 0        | 0        | 0        | 0        | 0         |
| ENSMUSG Scgb1a1    | 25885.9  | 31183.19 | 21255.46 | 22020.65 | 21290.08 | 21854.516 |
| ENSMUSG Olfr985    | 0        | 0        | 0        | 0        | 0        | 0         |
| ENSMUSG Anxa1      | 135.196  | 118.3549 | 128.8006 | 168.9877 | 171.6107 | 186.02556 |
| ENSMUSG Pwp2       | 3.976923 | 3.803174 | 4.273172 | 3.042608 | 3.271439 | 3.464742  |
| ENSMUSG Frmd4a     | 24.44914 | 21.65081 | 18.13    | 14.18462 | 17.53928 | 16.611801 |
| ENSMUSG Fcgr2b     | 5.359677 | 6.618861 | 7.446105 | 37.2522  | 40.89468 | 42.100907 |
| ENSMUSG Fam107b    | 20.61883 | 18.4878  | 19.72994 | 26.67699 | 23.91558 | 27.526871 |
| ENSMUSG Trpc1      | 3.230817 | 3.135918 | 3.433351 | 1.665633 | 2.077261 | 1.873238  |

|                   |          |          |          |          |          |           |
|-------------------|----------|----------|----------|----------|----------|-----------|
| ENSMUSG Meig1     | 3.552077 | 3.990319 | 2.550796 | 3.962911 | 5.482116 | 3.82773   |
| ENSMUSG Ube3a     | 12.45271 | 11.87177 | 9.912921 | 10.48447 | 10.59122 | 10.360758 |
| ENSMUSG Grin2a    | 0.024284 | 0.025908 | 0.020779 | 0.010048 | 0.007667 | 0.013216  |
| ENSMUSG Atp10a    | 4.150921 | 5.076842 | 4.032558 | 3.457367 | 3.36109  | 4.020763  |
| ENSMUSG Slc18a1   | 0.224491 | 0.365141 | 0.354522 | 0.680032 | 0.44908  | 0.643114  |
| ENSMUSG Kidins220 | 29.14205 | 22.91249 | 19.06761 | 18.11239 | 18.84725 | 18.085865 |
| ENSMUSG Atg9a     | 13.97137 | 14.12098 | 13.93488 | 11.32324 | 12.39448 | 11.271717 |
| ENSMUSG Hsd17b3   | 0        | 0        | 0        | 0        | 0        | 0         |
| ENSMUSG Tmem260   | 5.326367 | 5.079214 | 4.641287 | 4.677742 | 4.729415 | 4.671332  |
| ENSMUSG Gga1      | 24.20441 | 21.08999 | 21.6906  | 19.90271 | 19.12614 | 19.786362 |
| ENSMUSG Adcy9     | 9.866064 | 8.959151 | 8.197326 | 6.872522 | 7.705157 | 8.248948  |
| ENSMUSG Itgb8     | 0.179237 | 0.181561 | 0.15235  | 0.443024 | 0.360432 | 0.421724  |
| ENSMUSG Siglece   | 2.584803 | 2.453176 | 3.987222 | 2.530128 | 2.614728 | 2.139609  |
| ENSMUSG Csrp3     | 0.882268 | 11.20927 | 1.28561  | 4.729787 | 2.980549 | 2.180517  |
| ENSMUSG Zdhhc13   | 5.886086 | 5.151432 | 5.060584 | 6.178657 | 5.350866 | 6.657492  |
| ENSMUSG Ceacam18  | 0.028157 | 0.047007 | 0        | 0.041605 | 0.038097 | 0.023935  |
| ENSMUSG Kifc2     | 2.78143  | 2.670978 | 3.278724 | 2.775129 | 2.117419 | 2.776288  |
| ENSMUSG Gm13040   | 0        | 0        | 0        | 0        | 0        | 0         |
| ENSMUSG Gm13089   | 0        | 0        | 0        | 0        | 0        | 0         |
| ENSMUSG Ptptra    | 19.65216 | 20.62507 | 20.08089 | 19.84907 | 20.39643 | 21.035538 |
| ENSMUSG Ubox5     | 1.897227 | 1.801525 | 2.097038 | 1.730981 | 1.892876 | 1.836867  |
| ENSMUSG Oxt       | 0.109598 | 0        | 0        | 0        | 0        | 0         |
| ENSMUSG BC080695  | 0        | 0        | 0        | 0        | 0        | 0         |
| ENSMUSG Gm13119   | 0        | 0        | 0        | 0        | 0        | 0         |
| ENSMUSG Rtf1      | 14.19373 | 12.24268 | 12.86002 | 11.82253 | 12.11361 | 10.76141  |
| ENSMUSG Ndufaf1   | 5.31942  | 7.084617 | 7.132403 | 6.459255 | 5.622349 | 6.030159  |
| ENSMUSG Atg13     | 19.62009 | 18.63063 | 18.32804 | 16.90951 | 18.94736 | 16.185974 |
| ENSMUSG Kik1b8    | 0.065012 | 0        | 0        | 0        | 0.146159 | 0.038381  |
| ENSMUSG Cldn34b1  | 0        | 0        | 0        | 0        | 0        | 0         |
| ENSMUSG S100g     | 21.66906 | 24.61635 | 21.99848 | 42.08442 | 30.25311 | 43.14333  |
| ENSMUSG Chil3     | 130.2169 | 138.5444 | 172.1679 | 5720.139 | 6415.207 | 6039.9794 |
| Mus_musc Mus_musc | 0.26724  | 0.628364 | 0.476676 | 0.165761 | 0.14737  | 0.127218  |
| Mus_musc Mus_musc | 1.496517 | 1.254599 | 1.041846 | 0.552517 | 0.855554 | 0.703089  |
| ENSMUSG Wdr76     | 3.771604 | 3.752378 | 3.638469 | 3.601743 | 3.31057  | 3.611545  |
| Mus_musc Mus_musc | 0        | 0        | 0        | 0.195655 | 0        | 0         |
| Mus_musc Mus_musc | 0        | 0.267588 | 0        | 0        | 0        | 0         |
| ENSMUSG Abi1      | 42.27931 | 41.75897 | 40.40896 | 38.36082 | 38.01035 | 36.348258 |
| ENSMUSG Rex1bd    | 35.50348 | 34.32611 | 44.4851  | 39.06338 | 33.84918 | 43.239988 |
| ENSMUSG Opn1sw    | 0.023406 | 0.017693 | 0.122114 | 0        | 0.054303 | 0         |
| ENSMUSG Gm6502    | 0        | 0        | 0        | 0        | 0        | 0         |
| ENSMUSG Gm8871    | 0        | 0        | 0        | 0.416666 | 0        | 0.470828  |
| ENSMUSG Btbd35f10 | 0        | 0        | 0        | 0        | 0        | 0         |
| ENSMUSG Gm2056    | 0        | 0        | 0        | 0        | 0        | 0         |
| ENSMUSG A030005K  | 0        | 0.042354 | 0.140651 | 0        | 0.041335 | 0.021233  |
| ENSMUSG Tex11     | 0.773608 | 0.760957 | 0.635764 | 0.120281 | 0.239368 | 0.331706  |
| Mus_musc Mus_musc | 0        | 0        | 0        | 0        | 0        | 0         |
| ENSMUSG Gm3591    | 0.010037 | 0.062962 | 0        | 0        | 0        | 0         |
| Mus_musc Mus_musc | 0.178917 | 0.080895 | 0.040187 | 0.489713 | 0.147309 | 0.419297  |
| Mus_musc Mus_musc | 0.33717  | 0        | 0        | 0.039783 | 0.254633 | 0.221138  |
| Mus_musc Mus_musc | 0.332055 | 0        | 0.085866 | 0        | 0        | 0         |
| ENSMUSG Polq      | 0.152182 | 0.161839 | 0.2107   | 0.378326 | 0.227047 | 0.564161  |
| ENSMUSG Loxl2     | 3.504325 | 3.856619 | 3.87816  | 3.67769  | 3.954307 | 4.147525  |
| ENSMUSG 49305181l | 0.380019 | 0.324154 | 0.38953  | 0.660503 | 0.500184 | 0.408642  |
| ENSMUSG Tldc2     | 0.273072 | 0        | 0.306412 | 0        | 0        | 0.084743  |
| ENSMUSG Gas2l1    | 23.51818 | 21.47393 | 24.20814 | 20.99598 | 22.24084 | 20.646539 |
| ENSMUSG Gprasp1   | 7.824293 | 8.758785 | 7.669638 | 6.088143 | 5.707707 | 5.927974  |
| ENSMUSG Olfr267   | 0        | 0        | 0        | 0        | 0        | 0         |
| ENSMUSG Mroh8     | 0.058737 | 0.09296  | 0.039789 | 0.071197 | 0.08648  | 0.100342  |
| ENSMUSG Gm826     | 0.525047 | 0.172949 | 0.3702   | 0.063929 | 0        | 0.292665  |
| ENSMUSG Mafb      | 2.759975 | 2.372958 | 3.671787 | 13.11362 | 13.25876 | 16.193054 |
| Mus_musc Mus_musc | 0.139787 | 0        | 0.05483  | 0        | 0        | 0.357871  |
| Mus_musc Mus_musc | 0        | 0        | 0        | 0        | 0        | 0.338959  |
| Mus_musc Mus_musc | 0.115121 | 0.508785 | 0.05999  | 0.582988 | 0.607136 | 0         |
| Mus_musc Mus_musc | 0        | 0.111908 | 0.034126 | 0.117903 | 0        | 0.390327  |

|                   |          |          |          |          |          |           |
|-------------------|----------|----------|----------|----------|----------|-----------|
| Mus_musc Mus_musc | 0        | 0.198789 | 0        | 0.055694 | 0        | 0.421724  |
| Mus_musc Mus_musc | 0        | 0        | 0        | 0.384214 | 0.414975 | 0         |
| ENSMUSG a         | 0        | 0        | 0        | 0.438736 | 0.521002 | 0.324279  |
| ENSMUSG Slc25a51  | 25.46726 | 28.55193 | 24.65383 | 19.49919 | 20.79192 | 20.041218 |
| ENSMUSG C2cd2     | 9.739044 | 10.00314 | 8.640269 | 7.896898 | 8.28331  | 7.806962  |
| ENSMUSG Errfi1    | 84.29598 | 82.45833 | 64.68492 | 29.97776 | 43.10627 | 36.420596 |
| ENSMUSG Tnfrsf9   | 0.274327 | 0.370307 | 1.210285 | 4.926472 | 6.949263 | 6.21775   |
| ENSMUSG Park7     | 74.67534 | 73.85363 | 73.90426 | 63.88283 | 60.28562 | 59.323315 |
| ENSMUSG Uts2      | 0        | 0.086046 | 0.041449 | 0        | 0        | 0.073948  |
| ENSMUSG Slc4a2    | 24.30909 | 22.58117 | 23.82978 | 24.10582 | 26.71117 | 26.320336 |
| ENSMUSG Pgd       | 51.49484 | 49.20442 | 48.54877 | 54.01995 | 58.81874 | 63.905357 |
| ENSMUSG Ube4b     | 12.70935 | 13.72821 | 12.06513 | 13.20248 | 13.5362  | 12.763304 |
| ENSMUSG Cdk5      | 8.499601 | 8.03019  | 8.819715 | 7.902184 | 7.38346  | 7.452789  |
| ENSMUSG 8030474K  | 0.028332 | 0        | 0.02546  | 0        | 0        | 0         |
| ENSMUSG Eif2s3x   | 27.79815 | 28.57043 | 29.71994 | 22.87526 | 26.00283 | 30.050691 |
| ENSMUSG Elmod2    | 5.118986 | 4.804356 | 4.322283 | 4.555521 | 5.329824 | 5.340421  |
| ENSMUSG Ap2b1     | 34.94215 | 33.60796 | 32.30084 | 29.59097 | 31.79132 | 31.680812 |
| ENSMUSG Fcmr      | 8.059439 | 3.886568 | 5.991215 | 8.717121 | 6.992153 | 9.532213  |
| ENSMUSG Tfp2e     | 0        | 0        | 0        | 0        | 0        | 0         |
| ENSMUSG Abcb4     | 0.046927 | 0.159151 | 0.125615 | 0.085451 | 0.104447 | 0.117086  |
| ENSMUSG Mitf      | 3.609144 | 4.399949 | 3.667319 | 6.727459 | 6.547198 | 7.902758  |
| ENSMUSG Tbc1d8b   | 6.608194 | 7.278481 | 5.33665  | 6.2802   | 5.969611 | 6.394109  |
| ENSMUSG Zfp410    | 11.34161 | 12.67764 | 12.34299 | 9.975765 | 10.50547 | 10.479337 |
| ENSMUSG Defb43    | 0        | 0        | 0        | 0        | 0        | 0         |
| ENSMUSG Defb47    | 0        | 0        | 0        | 0        | 0        | 0         |
| ENSMUSG Krt26     | 0        | 0        | 0        | 0        | 0        | 0         |
| ENSMUSG Defb30    | 0        | 0        | 0        | 0        | 0.108731 | 0         |
| ENSMUSG Defb48    | 0        | 0        | 0        | 0        | 0        | 0         |
| ENSMUSG Baz1b     | 26.99566 | 30.20741 | 27.87601 | 25.05157 | 26.63593 | 24.32884  |
| ENSMUSG Ykt6      | 30.10937 | 28.28979 | 31.8908  | 26.35489 | 28.37276 | 28.578306 |
| ENSMUSG Gm3486    | 0        | 0        | 0        | 0        | 0        | 0         |
| Mus_musc Mus_musc | 0.083591 | 0.434148 | 0.542208 | 0.614714 | 0.248782 | 0.410881  |
| ENSMUSG Hbb-bh2   | 0        | 0        | 0        | 0        | 0        | 0         |
| ENSMUSG Gm10964   | 0.15826  | 0        | 0        | 0        | 0.418502 | 0         |
| ENSMUSG Ccdc47    | 35.85928 | 38.00629 | 36.21881 | 29.30364 | 29.67676 | 28.298546 |
| ENSMUSG Gm12789   | 0        | 0        | 0        | 0        | 0        | 0         |
| ENSMUSG Olfr613   | 0        | 0        | 0        | 0        | 0        | 0         |
| ENSMUSG 10-Mar    | 0.021103 | 0.077054 | 0.092876 | 0.197443 | 0.036258 | 0.055436  |
| ENSMUSG Gm12790   | 0        | 0        | 0        | 0        | 0        | 0         |
| ENSMUSG Syt5      | 4.690182 | 6.238765 | 3.397383 | 3.256553 | 2.510232 | 2.522502  |
| ENSMUSG Kik1b24   | 0        | 0.047111 | 0        | 0        | 0        | 0         |
| ENSMUSG 9930104L  | 6.094371 | 5.364281 | 6.469209 | 4.685536 | 4.114913 | 4.19945   |
| ENSMUSG Serpinb1a | 9.836358 | 9.411786 | 10.89601 | 11.53432 | 10.56253 | 11.50223  |
| ENSMUSG Kik14     | 0.418226 | 0.760622 | 0.438224 | 0.540942 | 0.569184 | 0.917743  |
| ENSMUSG Agpat3    | 23.53853 | 24.80599 | 23.2226  | 22.33982 | 23.60743 | 21.807848 |
| ENSMUSG Zfp456    | 0.707898 | 0.694938 | 0.684011 | 1.083061 | 0.879314 | 0.737177  |
| ENSMUSG Zfp429    | 4.059798 | 3.574019 | 3.484672 | 4.724733 | 4.459089 | 3.98605   |
| ENSMUSG Bpifa6    | 0        | 0        | 0        | 0        | 0        | 0         |
| Mus_musc Mus_musc | 0.447607 | 0.02887  | 0.101168 | 0.44745  | 0.27873  | 0.164458  |
| Mus_musc Mus_musc | 0.447804 | 0        | 0.213239 | 0.276379 | 0.433105 | 0.230222  |
| Mus_musc Mus_musc | 1.719751 | 2.453695 | 2.55272  | 3.006782 | 2.554187 | 2.257377  |
| Mus_musc Mus_musc | 1.074703 | 1.695282 | 1.919024 | 1.958443 | 1.209729 | 1.491872  |
| Mus_musc Mus_musc | 0        | 0        | 0        | 0.277187 | 0        | 0         |
| ENSMUSG 11-Sep    | 19.8331  | 20.80048 | 21.74338 | 22.43531 | 23.92424 | 23.8541   |
| ENSMUSG Olfr502   | 0        | 0        | 0        | 0        | 0        | 0         |
| ENSMUSG Serpinb3d | 0        | 0        | 0        | 0        | 0        | 0         |
| ENSMUSG Ces5a     | 0        | 0        | 0        | 0        | 0        | 0         |
| ENSMUSG Siah2     | 5.015295 | 5.068546 | 5.160996 | 3.528903 | 4.157715 | 4.512013  |
| ENSMUSG Dnmt3c    | 0.091394 | 0.094404 | 0.315378 | 0.19159  | 0        | 0         |
| ENSMUSG Npy1r     | 3.234856 | 2.722071 | 2.749944 | 2.615017 | 2.286489 | 3.275311  |
| ENSMUSG Syce1l    | 0.073666 | 0.037004 | 0        | 0        | 0        | 0         |
| ENSMUSG Fam169a   | 0.031427 | 0.033157 | 0.028344 | 0.070023 | 0.055178 | 0.025848  |
| ENSMUSG Poldip3   | 21.80722 | 22.60878 | 19.78124 | 20.52052 | 19.37923 | 20.247066 |
| ENSMUSG Dynap     | 0        | 0        | 0        | 0        | 0        | 0.090067  |

|                    |          |          |          |          |          |           |
|--------------------|----------|----------|----------|----------|----------|-----------|
| ENSMUSG Mbd2       | 61.00787 | 59.49264 | 63.1913  | 47.12895 | 47.49541 | 42.753525 |
| ENSMUSG 9330161LC  | 0.191984 | 0.205746 | 0.335167 | 0.171752 | 0.148195 | 0.042221  |
| ENSMUSG Rab27b     | 4.842749 | 4.76424  | 5.148574 | 7.549337 | 8.207177 | 6.66751   |
| ENSMUSG Sec11c     | 23.64453 | 23.30126 | 26.25798 | 79.0342  | 85.33481 | 82.111082 |
| ENSMUSG Grp        | 4.858315 | 3.55072  | 3.191282 | 1.301598 | 2.342612 | 1.121323  |
| ENSMUSG Smad4      | 29.49582 | 29.21469 | 24.32433 | 23.74547 | 24.18741 | 23.319709 |
| ENSMUSG Rax        | 0        | 0        | 0.088466 | 0.045459 | 0        | 0         |
| ENSMUSG Cplx4      | 0        | 0        | 0        | 0        | 0        | 0         |
| Mus_musc Mus_musc  | 0        | 0        | 0        | 0        | 0        | 0.169923  |
| Mus_musc Mus_musc  | 3.034145 | 2.933278 | 3.085226 | 2.560323 | 2.286533 | 2.487894  |
| Mus_musc Mus_musc  | 1.351035 | 0.552165 | 0.830369 | 0.236611 | 0.500786 | 0.214834  |
| Mus_musc Mus_musc  | 0.14705  | 0.292132 | 0        | 0        | 0        | 0         |
| Mus_musc Mus_musc  | 1.843545 | 1.537499 | 1.400692 | 1.239881 | 1.342353 | 0.622046  |
| Mus_musc Mus_musc  | 7.7623   | 7.077325 | 7.99256  | 9.717774 | 8.141919 | 7.426045  |
| Mus_musc Mus_musc  | 0        | 0        | 0        | 0.072987 | 0        | 0.016165  |
| Mus_musc Mus_musc  | 0        | 0.811364 | 0        | 8.00E-05 | 0        | 0         |
| Mus_musc Mus_musc  | 0.360205 | 0.122454 | 0.194752 | 0.472596 | 0        | 0.296289  |
| Mus_musc Mus_musc  | 0        | 0.08674  | 0.041721 | 0        | 0.079486 | 0.28857   |
| ENSMUSG Lgi1       | 0        | 0.023781 | 0        | 0.012414 | 0.005903 | 0.005445  |
| ENSMUSG Taar2      | 0        | 0        | 0        | 0.077625 | 0        | 0.054172  |
| ENSMUSG Olfr767    | 0        | 0        | 0        | 0        | 0        | 0         |
| ENSMUSG Olfr682-ps | 0        | 0        | 0        | 0        | 0        | 0         |
| Mus_musc Mus_musc  | 0        | 0        | 0        | 0        | 0        | 0.146878  |
| ENSMUSG Olfr1356   | 0        | 0        | 0        | 0        | 0        | 0         |
| ENSMUSG Olfr1038-p | 0        | 0        | 0        | 0        | 0        | 0         |
| ENSMUSG Mmp13      | 0.577882 | 0.214809 | 0.680232 | 8.891359 | 4.920143 | 6.785985  |
| Mus_musc Mus_musc  | 0.473255 | 0        | 0.158663 | 0        | 0.286346 | 0         |
| Mus_musc Mus_musc  | 3.378727 | 3.929718 | 4.672707 | 1.988026 | 1.449882 | 0.869962  |
| Mus_musc Mus_musc  | 0.578354 | 0        | 0        | 0        | 0        | 0         |
| Mus_musc Mus_musc  | 3.821839 | 4.540421 | 4.806927 | 3.382971 | 2.338575 | 2.29208   |
| Mus_musc Mus_musc  | 0.182969 | 0        | 0        | 0        | 0.107348 | 0         |
| Mus_musc Mus_musc  | 0        | 0        | 0        | 0        | 0.186692 | 0.430809  |
| Mus_musc Mus_musc  | 0.723329 | 1.045417 | 0.970054 | 0.335813 | 0.288853 | 0.458459  |
| ENSMUSG Tceanc     | 1.272937 | 1.269641 | 1.061864 | 1.322639 | 1.450382 | 1.034517  |
| ENSMUSG Fam83a     | 0.232032 | 0.157986 | 0.147614 | 0.21994  | 0.118861 | 0.102677  |
| ENSMUSG Ercc6l     | 0.315242 | 0.288508 | 0.390447 | 0.481252 | 0.490499 | 0.879696  |
| ENSMUSG Bzw1       | 54.57952 | 52.6668  | 51.51243 | 49.01196 | 50.44453 | 48.2841   |
| ENSMUSG Nyx        | 0.264942 | 0.239011 | 0.190546 | 0.157128 | 0.128088 | 0.147406  |
| ENSMUSG Bcdin3d    | 2.166193 | 2.002997 | 2.512594 | 2.034189 | 1.734512 | 2.052771  |
| ENSMUSG Zbtb44     | 5.614884 | 5.549776 | 4.995957 | 4.317789 | 4.604991 | 3.959399  |
| ENSMUSG Flrt2      | 2.851047 | 3.968812 | 1.534559 | 2.535189 | 2.215628 | 2.898016  |
| ENSMUSG Gpr68      | 0.805692 | 1.180518 | 1.404421 | 2.893407 | 2.673269 | 3.605217  |
| ENSMUSG Rexo1      | 10.87047 | 10.34947 | 11.26054 | 9.609837 | 9.523553 | 10.122839 |
| ENSMUSG Cmya5      | 0.503242 | 1.381674 | 0.405019 | 0.65886  | 0.643356 | 0.415196  |
| ENSMUSG Gm3415     | 0        | 0        | 0        | 0        | 0        | 0         |
| Mus_musc Mus_musc  | 0        | 0        | 0        | 0        | 0        | 0         |
| Mus_musc Mus_musc  | 0.596852 | 0.536879 | 0.631985 | 0.501397 | 0.416767 | 0.464884  |
| Mus_musc Mus_musc  | 0.441295 | 1.114932 | 0.711499 | 0.89275  | 0.984119 | 0.346919  |
| Mus_musc Mus_musc  | 0.240782 | 0.087279 | 0.126893 | 0.277166 | 0.363247 | 0         |
| ENSMUSG Olfr437    | 0        | 0        | 0        | 0        | 0        | 0         |
| ENSMUSG Gm28053    | 1.74172  | 1.312505 | 0.963491 | 1.238786 | 0.748786 | 0.945394  |
| ENSMUSG Anks6      | 1.499675 | 1.470308 | 0.893294 | 0.835552 | 1.097597 | 1.022348  |
| ENSMUSG Spag8      | 2.200614 | 2.128127 | 1.48444  | 3.904301 | 3.009705 | 3.208072  |
| ENSMUSG Gpr139     | 0        | 0        | 0        | 0        | 0        | 0         |
| ENSMUSG Nat8f1     | 2.075012 | 2.0779   | 2.488781 | 2.974348 | 2.56002  | 3.030336  |
| ENSMUSG Zfp180     | 12.97622 | 14.43626 | 15.04239 | 11.70797 | 11.67054 | 9.958458  |
| ENSMUSG Fam184b    | 0.07515  | 0.055043 | 0.052842 | 0.030728 | 0.013222 | 0.025002  |
| ENSMUSG Gm44503    | 0        | 0        | 0        | 0        | 0        | 0         |
| Mus_musc Mus_musc  | 0.877445 | 0.383817 | 0.493198 | 0.210094 | 0.046699 | 0.251739  |
| ENSMUSG Bmf        | 12.17061 | 10.9939  | 9.819114 | 13.11956 | 13.55351 | 12.190864 |
| ENSMUSG 4933405L1  | 0        | 0        | 0.054967 | 0        | 0        | 0         |
| ENSMUSG Adarb2     | 0        | 0        | 0.018926 | 0.003388 | 0.036213 | 0.009203  |
| ENSMUSG Gan        | 3.044842 | 3.22941  | 2.794815 | 2.764541 | 3.03816  | 3.054119  |
| ENSMUSG Defb34     | 0        | 0        | 0        | 0        | 0        | 0         |

|                   |          |          |          |          |          |           |
|-------------------|----------|----------|----------|----------|----------|-----------|
| ENSMUSG Gfod2     | 6.300495 | 6.12401  | 6.247249 | 5.36997  | 6.297856 | 6.886268  |
| ENSMUSG Enkd1     | 2.619142 | 2.240785 | 2.517962 | 3.379914 | 2.822152 | 3.362598  |
| Mus_musc Mus_musc | 0        | 0        | 0.05581  | 0.545168 | 0.570935 | 0.756546  |
| ENSMUSG Prkcb     | 3.065262 | 1.972263 | 3.721332 | 7.053873 | 5.541369 | 6.213709  |
| ENSMUSG Fam76b    | 11.2677  | 11.99198 | 11.27725 | 8.965884 | 8.369284 | 9.566334  |
| ENSMUSG Iqch      | 0.161813 | 0.135987 | 0.069884 | 0.352589 | 0.340102 | 0.263188  |
| ENSMUSG Tmem62    | 5.404068 | 6.000933 | 5.514706 | 6.265111 | 6.066978 | 6.729676  |
| ENSMUSG Rpl10a    | 295.023  | 292.9465 | 310.8966 | 360.2278 | 346.0233 | 393.35043 |
| ENSMUSG Ikbzf3    | 4.579835 | 2.387405 | 5.093453 | 13.33728 | 10.23213 | 12.640566 |
| ENSMUSG Mfng      | 34.13493 | 30.33811 | 34.04471 | 21.69697 | 22.56059 | 19.227646 |
| ENSMUSG BC048403  | 3.194528 | 3.406161 | 2.472132 | 2.891588 | 2.870484 | 2.542049  |
| ENSMUSG Dpep2     | 7.156729 | 6.998365 | 6.913266 | 8.88732  | 9.041727 | 10.127789 |
| ENSMUSG Med1      | 6.337265 | 6.871974 | 6.089041 | 6.73905  | 6.890306 | 6.597621  |
| ENSMUSG Nuggc     | 0.03973  | 0        | 0        | 0.873758 | 0.754217 | 0.878256  |
| ENSMUSG Erbb3     | 14.97632 | 16.47547 | 11.50454 | 13.78564 | 14.77751 | 12.400277 |
| ENSMUSG Stard3    | 26.00782 | 25.88335 | 30.21222 | 25.18079 | 25.27774 | 27.306444 |
| ENSMUSG Ap3m1     | 17.8965  | 17.26055 | 18.89801 | 14.7477  | 15.79071 | 15.169511 |
| ENSMUSG Fam205a3  | 0.004246 | 0.004708 | 0        | 0.008351 | 0.00942  | 0.002752  |
| ENSMUSG Camk2g    | 13.96806 | 13.49902 | 13.54571 | 13.34783 | 12.88776 | 13.038105 |
| ENSMUSG Vcl       | 65.51628 | 56.84838 | 63.00839 | 38.94875 | 40.58078 | 42.031653 |
| ENSMUSG Gm20736   | 0        | 0        | 0        | 0        | 0        | 0         |
| ENSMUSG St3gal1   | 34.63875 | 34.96466 | 33.27687 | 28.25514 | 29.01129 | 30.885991 |
| ENSMUSG Ccdc110   | 0        | 0        | 0.070984 | 0.019787 | 0        | 0         |
| ENSMUSG 1700029J0 | 2.192975 | 2.075292 | 1.529222 | 2.295673 | 3.594632 | 2.756942  |
| ENSMUSG Apobec4   | 0.183469 | 0.197863 | 0.14941  | 0.38548  | 0.381018 | 0.288629  |
| ENSMUSG Timd4     | 0.572574 | 1.25521  | 0.331731 | 0.328573 | 0.50333  | 0.845663  |
| ENSMUSG Chd5      | 0.653998 | 0.581994 | 0.667314 | 0.281974 | 0.36135  | 0.38512   |
| ENSMUSG 2310039H1 | 5.753219 | 7.25699  | 7.370253 | 7.924129 | 7.146739 | 6.555531  |
| ENSMUSG Gm20937   | 0        | 0        | 0        | 0        | 0        | 0         |
| ENSMUSG Peg3      | 1.893172 | 2.008038 | 1.759359 | 1.423974 | 1.867164 | 1.966093  |
| ENSMUSG Zim1      | 0.028768 | 0.062261 | 0.05031  | 0.116606 | 0.08734  | 0.080709  |
| ENSMUSG Kdm4a     | 15.01787 | 15.04771 | 15.43313 | 14.89085 | 14.9381  | 13.827401 |
| ENSMUSG Hist4h4   | 0        | 0        | 0.008851 | 0.017626 | 0        | 0.019236  |
| ENSMUSG Ifna15    | 0        | 0        | 0        | 0        | 0        | 0         |
| ENSMUSG Gm8439    | 0        | 0.13447  | 0        | 0        | 0.09868  | 0.126299  |
| ENSMUSG Gm4181    | 0        | 0        | 0        | 0        | 0        | 0         |
| ENSMUSG Pou5f2    | 0        | 0.032323 | 0.018179 | 0.112349 | 0.040178 | 0         |
| ENSMUSG Gm29427   | 0        | 0.09526  | 0.217408 | 0.042328 | 0.016596 | 0.041666  |
| ENSMUSG Gm36864   | 0        | 0.053248 | 0        | 0        | 0        | 0         |
| ENSMUSG Olfr503   | 0        | 0        | 0        | 0        | 0        | 0         |
| ENSMUSG Krtap2-4  | 0        | 0        | 0        | 0        | 0        | 0         |
| ENSMUSG Cdc40     | 11.57928 | 12.04813 | 11.55696 | 9.607672 | 9.923809 | 9.684762  |
| ENSMUSG Maz       | 33.66952 | 37.14858 | 39.70213 | 36.89071 | 37.68563 | 37.211219 |
| ENSMUSG Mylpf     | 2.061135 | 1.218436 | 1.350988 | 2.007215 | 1.287494 | 1.657049  |
| ENSMUSG Cyp2r1    | 0.240114 | 0.097394 | 0.15506  | 0.269928 | 0.300009 | 0.163884  |
| ENSMUSG Pde3b     | 3.021376 | 2.698628 | 2.846701 | 4.700859 | 4.656487 | 4.555114  |
| ENSMUSG Kif22     | 0.771244 | 0.927187 | 1.382142 | 2.488925 | 2.802033 | 3.51944   |
| ENSMUSG Qprt      | 0.139336 | 0.042567 | 0.284719 | 0.391154 | 0.176493 | 0.537285  |
| ENSMUSG Larp4b    | 20.17034 | 21.24819 | 17.58398 | 18.36428 | 18.59847 | 19.291834 |
| ENSMUSG Strc      | 0        | 0        | 0        | 0        | 0        | 0         |
| ENSMUSG Prss35    | 0.062077 | 0.239977 | 0.04091  | 0.372538 | 0.519909 | 0.427629  |
| Mus_musc Mus_musc | 0.188031 | 0        | 0        | 0        | 0        | 0         |
| ENSMUSG Bin3      | 12.53121 | 11.50121 | 11.98026 | 13.55981 | 12.84469 | 15.993011 |
| ENSMUSG Gm7929    | 0        | 0        | 0        | 0        | 0        | 0         |
| ENSMUSG Cryba4    | 0        | 0        | 0.125448 | 0.615518 | 0.220888 | 0.786865  |
| ENSMUSG Bub3      | 28.52851 | 26.6869  | 26.43384 | 24.65595 | 24.73654 | 27.144328 |
| ENSMUSG Spon2     | 0.527683 | 0.602221 | 0.404042 | 2.018503 | 0.805846 | 2.908015  |
| ENSMUSG Trmt6     | 4.03872  | 3.334128 | 3.852378 | 4.49353  | 4.527586 | 4.305126  |
| ENSMUSG Hhat      | 0.546013 | 0.333458 | 0.454235 | 0.331789 | 0.586595 | 0.661552  |
| ENSMUSG Ctbp1     | 62.263   | 62.87648 | 65.44408 | 60.86085 | 61.9336  | 63.081245 |
| ENSMUSG Enpp1     | 0.853494 | 1.13508  | 1.342493 | 3.471203 | 3.829515 | 4.096191  |
| ENSMUSG Itgb1bp1  | 14.16622 | 13.31028 | 19.80384 | 15.93224 | 14.75169 | 16.353963 |
| ENSMUSG Cfap99    | 0.625317 | 0.799675 | 0.414264 | 0.976937 | 0.74246  | 0.721911  |
| Mus_musc Mus_musc | 0        | 0.154309 | 0        | 0        | 0.115633 | 0         |

|                   |          |          |          |          |          |           |
|-------------------|----------|----------|----------|----------|----------|-----------|
| ENSMUSG Gm19345   | 0.15482  | 0        | 0        | 0.330984 | 0.134008 | 0         |
| ENSMUSG A930009A  | 0        | 0        | 0        | 0        | 0        | 0         |
| ENSMUSG Slc22a13b | 0.226205 | 0.359632 | 0.138984 | 0.301007 | 0.113129 | 0.088514  |
| ENSMUSG Ldha      | 142.6029 | 154.7746 | 155.9853 | 163.7946 | 173.264  | 189.02509 |
| ENSMUSG Adssl1    | 8.45053  | 9.392335 | 9.478951 | 11.01988 | 10.92437 | 12.014038 |
| ENSMUSG Gm3029    | 0        | 0        | 0        | 0        | 0        | 0         |
| ENSMUSG Gm20843   | 0        | 0        | 0        | 0        | 0        | 0         |
| ENSMUSG Vmn1r104  | 0        | 0        | 0        | 0        | 0        | 0         |
| ENSMUSG Olfr930   | 0        | 0        | 0        | 0        | 0        | 0         |
| ENSMUSG Zfand1    | 4.923695 | 5.588682 | 5.780762 | 6.818318 | 6.104283 | 5.363929  |
| ENSMUSG Olfr917   | 0        | 0        | 0        | 0        | 0        | 0         |
| ENSMUSG ltm2a     | 11.42825 | 12.17066 | 13.46602 | 10.49869 | 9.354635 | 9.398621  |
| ENSMUSG Alg1      | 21.1557  | 18.59844 | 18.32425 | 17.68206 | 16.57345 | 16.192323 |
| ENSMUSG Tmem135   | 9.484851 | 9.725717 | 8.727893 | 10.52037 | 10.69056 | 10.957994 |
| ENSMUSG Gm29866   | 0        | 0        | 0        | 0        | 0        | 0         |
| ENSMUSG Cox7b     | 26.68253 | 30.52179 | 33.42194 | 43.89692 | 40.45871 | 42.655769 |
| ENSMUSG Fgf16     | 0.126878 | 0.14915  | 0.296588 | 0.147993 | 0.189189 | 0.073451  |
| ENSMUSG Pgk2      | 0        | 0        | 0        | 0        | 0        | 0         |
| ENSMUSG Magt1     | 16.02011 | 16.80729 | 18.91935 | 18.46199 | 19.41597 | 17.852223 |
| ENSMUSG Aldh1a7   | 62.47821 | 74.56761 | 48.88047 | 71.92924 | 75.7407  | 82.135391 |
| ENSMUSG Platr25   | 3.202383 | 2.874248 | 2.902515 | 3.479945 | 3.296393 | 3.521522  |
| ENSMUSG Olfr214   | 0        | 0        | 0        | 0        | 0        | 0         |
| ENSMUSG BC025920  | 0.322094 | 0.384748 | 0.208061 | 0.373338 | 0.411796 | 0.619223  |
| ENSMUSG Ggnbp1    | 3.597607 | 3.104043 | 3.3105   | 2.389573 | 2.553408 | 1.920693  |
| ENSMUSG Kih11     | 5.941027 | 7.219483 | 4.357594 | 5.499652 | 5.263663 | 5.647506  |
| ENSMUSG Spata7    | 2.401707 | 1.941198 | 1.633379 | 1.717561 | 1.733136 | 2.120386  |
| ENSMUSG Galc      | 6.648448 | 7.075907 | 6.419838 | 10.2237  | 10.69033 | 11.764944 |
| ENSMUSG Mia2      | 29.35682 | 30.74657 | 30.10802 | 31.03779 | 31.53503 | 31.853015 |
| ENSMUSG Ptpn21    | 12.68934 | 12.94582 | 12.81484 | 9.22703  | 9.015538 | 9.181486  |
| ENSMUSG Atg3      | 22.61524 | 21.72308 | 22.79648 | 21.87812 | 21.32636 | 20.613876 |
| ENSMUSG Cd200     | 30.35479 | 34.90761 | 32.11433 | 34.2876  | 35.13227 | 34.571591 |
| ENSMUSG Cd200r1   | 4.824267 | 3.532794 | 3.956199 | 11.84925 | 12.95522 | 11.513639 |
| ENSMUSG Slc35a5   | 8.298973 | 7.457959 | 7.040994 | 7.264561 | 6.533493 | 6.570773  |
| ENSMUSG Ccdc80    | 5.947867 | 8.665515 | 4.01213  | 10.72014 | 12.36548 | 14.533986 |
| ENSMUSG Gtpbp8    | 5.654103 | 7.691065 | 6.463079 | 6.554732 | 5.448284 | 6.493255  |
| ENSMUSG Umad1     | 6.41925  | 8.794092 | 7.958053 | 8.139247 | 9.487863 | 8.448261  |
| ENSMUSG Vax2      | 0        | 0        | 0        | 0.042044 | 0        | 0         |
| ENSMUSG Zc3h12a   | 5.190077 | 3.980843 | 5.957283 | 6.917253 | 5.6828   | 6.210118  |
| ENSMUSG Dsg1c     | 0        | 0        | 0        | 0        | 0        | 0         |
| ENSMUSG BC030867  | 0.020093 | 0.09258  | 0.047143 | 0.375771 | 0.706602 | 0.554687  |
| ENSMUSG Tle2      | 7.266471 | 7.392173 | 9.420145 | 7.194005 | 6.025727 | 7.440605  |
| ENSMUSG Lrfn3     | 1.306056 | 1.475295 | 1.414889 | 1.626924 | 1.472062 | 0.879065  |
| Mus_musc Mus_musc | 0.883601 | 0.829111 | 1.103364 | 1.149458 | 0.848867 | 1.194333  |
| ENSMUSG Actb      | 978.5996 | 792.4705 | 933.8165 | 779.9548 | 821.8492 | 920.13784 |
| ENSMUSG Fscn1     | 7.18751  | 5.183465 | 5.970816 | 12.03623 | 12.12844 | 14.186816 |
| ENSMUSG Spdye4b   | 0        | 0        | 0        | 0        | 0        | 0         |
| ENSMUSG Zfp12     | 7.886789 | 7.360934 | 7.48728  | 6.077201 | 5.732432 | 6.206362  |
| ENSMUSG C130079G  | 0        | 0        | 0        | 0        | 0        | 0         |
| ENSMUSG Dcst1     | 0.116737 | 0.129209 | 0.083748 | 0.092804 | 0.046952 | 0.062601  |
| ENSMUSG Rgs8      | 0        | 0        | 0        | 0        | 0        | 0         |
| ENSMUSG Immp1l    | 12.20777 | 14.9146  | 9.389279 | 10.40871 | 12.69009 | 9.31345   |
| ENSMUSG Kif1bp    | 18.83209 | 18.27879 | 17.65978 | 14.48784 | 15.39583 | 14.800649 |
| ENSMUSG Ypel3     | 54.77185 | 41.45511 | 44.03879 | 48.1116  | 56.12974 | 54.935214 |
| ENSMUSG Bcorl1    | 4.4362   | 4.344169 | 3.925841 | 3.133173 | 3.583969 | 3.448924  |
| ENSMUSG Cst11     | 0        | 0        | 0        | 0        | 0        | 0         |
| ENSMUSG Myo15     | 0.05679  | 0.053639 | 0.053183 | 0.131196 | 0.095289 | 0.171854  |

**Table S2: Gene set enrichment analysis**

| ID       | Description               | setSize | enrichment | NES  | Direction | pvalue   | p.adjust | qvalues  | rank | leading_ec | core_enrichment                                     |
|----------|---------------------------|---------|------------|------|-----------|----------|----------|----------|------|------------|-----------------------------------------------------|
| mmu05310 | Asthma                    | 18      | 0.79       | 1.79 | GSH       | 0.00051  | 0.008206 | 0.006246 | 1902 | tags=78%   | list=13% signal=68 Prg2/Ccl11/H2-Eb2/Il4/H2-Ob/     |
| mmu04672 | Intestinal immune netw    | 37      | 0.78       | 2.02 | GSH       | 8.83E-07 | 4.10E-05 | 3.12E-05 | 1674 | tags=62%   | list=11% signal=55 Pigr/H2-Eb2/Tnfrsf17/Aicda/Tnt   |
| mmu04061 | Viral protein interaction | 79      | 0.7        | 1.99 | GSH       | 1.18E-07 | 1.50E-05 | 1.14E-05 | 1963 | tags=52%   | list=13% signal=45 Ccl8/Cxcl3/Ccl24/Ccl11/Ccl9/Cc   |
| mmu04360 | Axon guidance             | 170     | 0.45       | 1.93 | GSL       | 1.38E-07 | 1.50E-05 | 1.14E-05 | 3130 | tags=45%   | list=21% signal=36 Cxcl12/Ptpn11/Lrig2/Ssh2/Arhg    |
| mmu05340 | Primary immunodeficien    | 32      | 0.77       | 1.91 | GSH       | 2.17E-05 | 0.000619 | 0.000471 | 2512 | tags=66%   | list=17% signal=55 Aicda/Blnk/Il7r/Tnfrsf13b/Cd79c  |
| mmu04060 | Cytokine-cytokine recej   | 217     | 0.61       | 1.91 | GSH       | 1.79E-10 | 5.80E-08 | 4.42E-08 | 1553 | tags=37%   | list=10% signal=34 Ccl8/Cxcl3/Ccl24/Il5ra/Ccl11/Cc  |
| mmu04142 | Lysosome                  | 122     | 0.63       | 1.89 | GSH       | 2.61E-07 | 2.12E-05 | 1.61E-05 | 2978 | tags=45%   | list=20% signal=36 Ctsk/Acp5/Ctss/Psapl1/Psap/Cts   |
| mmu04145 | Phagosome                 | 154     | 0.6        | 1.82 | GSH       | 3.37E-07 | 2.19E-05 | 1.67E-05 | 2591 | tags=38%   | list=17% signal=32 H2-M2/Thbs4/Cd209d/H2-Eb2        |
| mmu04064 | NF-kappa B signaling p    | 101     | 0.62       | 1.79 | GSH       | 2.29E-05 | 0.000619 | 0.000471 | 2241 | tags=39%   | list=15% signal=33 Cxcl3/Blnk/Tnfsf11/Tnfrsf13c/Bc  |
| mmu05150 | Staphylococcus aureus     | 48      | 0.67       | 1.79 | GSH       | 0.00032  | 0.005861 | 0.004461 | 2590 | tags=62%   | list=17% signal=52 H2-Eb2/C3ar1/Fcgr2b/C1qb/Pt      |
| mmu04062 | Chemokine signaling pa    | 175     | 0.58       | 1.79 | GSH       | 6.45E-07 | 3.49E-05 | 2.66E-05 | 1439 | tags=26%   | list=10% signal=24 Ccl8/Cxcl3/Ccl24/Ccl11/Ccl9/Cc   |
| mmu05323 | Rheumatoid arthritis      | 78      | 0.63       | 1.79 | GSH       | 7.58E-05 | 0.00176  | 0.00134  | 1731 | tags=41%   | list=11% signal=37 Cxcl3/Ctsk/H2-Eb2/Cxcl5/Acp5/    |
| mmu05143 | African trypanosomiasis   | 30      | 0.56       | 1.77 | GSL       | 0.00565  | 0.041871 | 0.03187  | 857  | tags=37%   | list=6% signal=35 Ido1/Prkcg/Plcb1/F2r1/Fasl/Hb     |
| mmu05152 | Tuberculosis              | 154     | 0.58       | 1.75 | GSH       | 3.38E-06 | 0.000122 | 9.29E-05 | 1794 | tags=29%   | list=12% signal=25 Cd209d/H2-Eb2/Fcgr2b/Itgax/C     |
| mmu04390 | Hippo signaling pathwa    | 148     | 0.41       | 1.75 | GSL       | 3.11E-05 | 0.000778 | 0.000592 | 2992 | tags=40%   | list=20% signal=32 Wnt2/Bmpr1a/Smad1/Sav1/Ywl       |
| mmu04310 | Wnt signaling pathway     | 150     | 0.4        | 1.74 | GSL       | 1.92E-05 | 0.000619 | 0.000471 | 3070 | tags=39%   | list=20% signal=31 Tle4/Wnt2/Prkacb/Ppp3ca/Skp1     |
| mmu00770 | Pantothenate and CoA      | 20      | 0.75       | 1.73 | GSH       | 0.00136  | 0.015794 | 0.012021 | 1187 | tags=35%   | list=8% signal=32 Bcat1/Upb1/Vnn3/Enpp1/Vnn1/       |
| mmu01230 | Biosynthesis of amino a   | 65      | 0.61       | 1.7  | GSH       | 0.00071  | 0.01052  | 0.008007 | 2380 | tags=38%   | list=16% signal=33 Arg1/Bcat1/Pycr1/Pklr/Aldh18a:   |
| mmu04662 | B cell receptor signaling | 79      | 0.6        | 1.7  | GSH       | 0.00039  | 0.006607 | 0.005029 | 2333 | tags=40%   | list=15% signal=34 Blnk/Fcgr2b/Lilrb4a/Cd79a/Cd7    |
| mmu04110 | Cell cycle                | 120     | 0.57       | 1.7  | GSH       | 0.00018  | 0.003878 | 0.002952 | 1559 | tags=21%   | list=10% signal=19 Ccna1/Ccnb1/Cdk1/Ttk/Ccna2/      |
| mmu04657 | IL-17 signaling pathway   | 80      | 0.59       | 1.69 | GSH       | 0.00064  | 0.00986  | 0.007505 | 1462 | tags=24%   | list=10% signal=22 Muc5ac/Cxcl3/Ccl11/Muc5b/Mr      |
| mmu04610 | Complement and coagu      | 69      | 0.6        | 1.69 | GSH       | 0.00079  | 0.010729 | 0.008166 | 2609 | tags=49%   | list=17% signal=41 C3ar1/Serpib2/F10/Itgax/C1qb     |
| mmu04015 | Rap1 signaling pathway    | 192     | 0.38       | 1.69 | GSL       | 3.23E-06 | 0.000122 | 9.29E-05 | 2442 | tags=38%   | list=16% signal=32 Pik3r1/Plcb4/Fgf16/Rras/Adcy2/   |
| mmu04612 | Antigen processing and    | 70      | 0.59       | 1.66 | GSH       | 0.00094  | 0.011775 | 0.008963 | 1870 | tags=29%   | list=12% signal=25 H2-M2/H2-Eb2/Ctss/Ctsb/Lgmi      |
| mmu00520 | Amino sugar and nucle     | 48      | 0.61       | 1.65 | GSH       | 0.00323  | 0.029171 | 0.022203 | 3970 | tags=62%   | list=26% signal=46 Chia1/Hk3/Npl/Gck/Cmah/Hexk      |
| mmu03440 | Homologous recombina      | 40      | 0.63       | 1.65 | GSH       | 0.0038   | 0.032052 | 0.024396 | 1429 | tags=20%   | list=9% signal=18 Eme1/Brca1/Rad51/Rad54l/Rad       |
| mmu00982 | Drug metabolism - cytc    | 42      | 0.48       | 1.65 | GSL       | 0.00385  | 0.032052 | 0.024396 | 1702 | tags=40%   | list=11% signal=36 Maob/Ugt1a1/Gstm2/Cyp2e1/F       |
| mmu05322 | Systemic lupus erythem    | 90      | 0.57       | 1.64 | GSH       | 0.00082  | 0.010729 | 0.008166 | 3194 | tags=49%   | list=21% signal=39 H2-Eb2/C1qb/C1qc/C1qa/Cd8C       |
| mmu04514 | Cell adhesion molecule    | 141     | 0.54       | 1.64 | GSH       | 0.0002   | 0.004163 | 0.003168 | 2241 | tags=33%   | list=15% signal=28 H2-M2/Pdcd1lg2/H2-Eb2/Pdcc       |
| mmu05416 | Viral myocarditis         | 71      | 0.58       | 1.63 | GSH       | 0.00162  | 0.017524 | 0.013338 | 2279 | tags=31%   | list=15% signal=26 H2-M2/H2-Eb2/Cd80/Itgb2/H2       |
| mmu04640 | Hematopoietic cell line   | 86      | 0.57       | 1.63 | GSH       | 0.00144  | 0.016142 | 0.012286 | 1911 | tags=42%   | list=13% signal=37 Il5ra/H2-Eb2/Il7r/Il9r/Fcer2a/An |
| mmu03460 | Fanconi anemia pathwa     | 50      | 0.59       | 1.61 | GSH       | 0.00679  | 0.04902  | 0.037311 | 1365 | tags=22%   | list=9% signal=20 Eme1/Brca1/Rad51/Rmi2/Fanci/      |
| mmu05140 | Leishmaniasis             | 68      | 0.57       | 1.6  | GSH       | 0.00272  | 0.026033 | 0.019814 | 2837 | tags=46%   | list=19% signal=37 H2-Eb2/Nos2/C3/Fcgr3/Ncf1/Il     |
| mmu03010 | Ribosome                  | 128     | 0.53       | 1.57 | GSH       | 0.001    | 0.012093 | 0.009204 | 5750 | tags=79%   | list=38% signal=49 Rpl36al/Rps27rt/Rpl41/Rplp0/Rl   |
| mmu01200 | Carbon metabolism         | 104     | 0.54       | 1.56 | GSH       | 0.00177  | 0.017942 | 0.013656 | 2879 | tags=36%   | list=19% signal=29 Fbp1/Hk3/Pklr/Gck/Got1l1/Pcx/    |
| mmu04114 | Oocyte meiosis            | 107     | 0.53       | 1.56 | GSH       | 0.00296  | 0.027441 | 0.020886 | 1576 | tags=17%   | list=10% signal=15 lgf1/Ccnb1/Cdk1/Ccne1/Plk1/Bl    |
| mmu04914 | Progesterone-mediatec     | 83      | 0.54       | 1.55 | GSH       | 0.00567  | 0.041871 | 0.03187  | 550  | tags=13%   | list=4% signal=13 lgf1/Ccna1/Ccnb1/Cdk1/Ccna2/      |
| mmu04380 | Osteoclast differentiat   | 124     | 0.52       | 1.54 | GSH       | 0.00241  | 0.023747 | 0.018075 | 2070 | tags=33%   | list=14% signal=29 Ctsk/Trem2/Blnk/Fcgr2b/Acp5/     |
| mmu05169 | Epstein-Barr virus infect | 195     | 0.49       | 1.51 | GSH       | 0.00083  | 0.010729 | 0.008166 | 3660 | tags=35%   | list=24% signal=27 H2-M2/H2-Eb2/Ccna1/Blnk/Ccl      |
| mmu04625 | C-type lectin receptor s  | 103     | 0.51       | 1.49 | GSH       | 0.00458  | 0.036903 | 0.028088 | 1826 | tags=25%   | list=12% signal=22 Cd209d/Ccl22/Clec7a/Ccl17/Egl    |

|          |                       |     |      |      |     |         |          |          |      |          |          |           |                               |
|----------|-----------------------|-----|------|------|-----|---------|----------|----------|------|----------|----------|-----------|-------------------------------|
| mmu05203 | Viral carcinogenesis  | 200 | 0.47 | 1.46 | GSH | 0.00173 | 0.017942 | 0.013656 | 1590 | tags=13% | list=11% | signal=12 | H2-M2/Scin/Ccna1/Ccr3/Ccr5/C  |
| mmu03040 | Spliceosome           | 127 | 0.35 | 1.45 | GSL | 0.00361 | 0.03168  | 0.024113 | 6144 | tags=46% | list=41% | signal=28 | Snu13/Snrnp27/Cherp/Snrnp70   |
| mmu05224 | Breast cancer         | 128 | 0.35 | 1.45 | GSL | 0.00477 | 0.036903 | 0.028088 | 2885 | tags=38% | list=19% | signal=31 | Esr1/Egfr/Notch4/Pgr/Ccnd1/Fz |
| mmu05166 | Human T-cell leukemia | 220 | 0.46 | 1.42 | GSH | 0.00477 | 0.036903 | 0.028088 | 2607 | tags=25% | list=17% | signal=21 | H2-M2/H2-Eb2/Ccna1/Ccna2/C    |
| mmu04010 | MAPK signaling pathwa | 268 | 0.31 | 1.37 | GSL | 0.00022 | 0.004184 | 0.003185 | 2379 | tags=29% | list=16% | signal=25 | Fgf16/Ras/Akt3/Map3k5/Map3    |



### Additional file 3. Hub genes of Hippo signaling pathway

x  
1 Wnt2  
2 Bmpr1a  
3 Smad1  
4 Sav1  
5 Ywhab  
6 Ccnd3  
7 Wwc1  
8 Ccnd1  
9 Tead2  
10 Fzd1  
11 Fzd5  
12 Ppp2cb  
13 Fzd8  
14 Bmp5  
15 Wwtr1  
16 Crb2  
17 Pard3  
18 Bmp4  
19 Patj  
20 Csnk1e  
21 Wnt4  
22 Yap1  
23 Rassf1  
24 Trp53bp2  
25 Snai2  
26 Nkd1  
27 Ctnna1  
28 Prkci  
29 Axin2  
30 Ajuba  
31 Lats2  
32 Frmd6  
33 Mpp5  
34 Wnt9a  
35 Fzd4  
36 Pard6g  
37 Bmpr2  
38 Bmp2  
39 Pard6b  
40 Tead4  
41 Tead1  
42 Smad7  
43 Wnt2b  
44 Wnt7a  
45 Bmp6  
46 Fgf1  
47 Wnt3a  
48 Apc2  
49 Wnt5b  
50 Tgfb2  
51 Lef1  
52 Nkd2  
53 Ccn2  
54 Serpine1  
55 Id1  
56 Ppp2r2c  
57 Wnt10b  
58 Areg  
59 Crb1

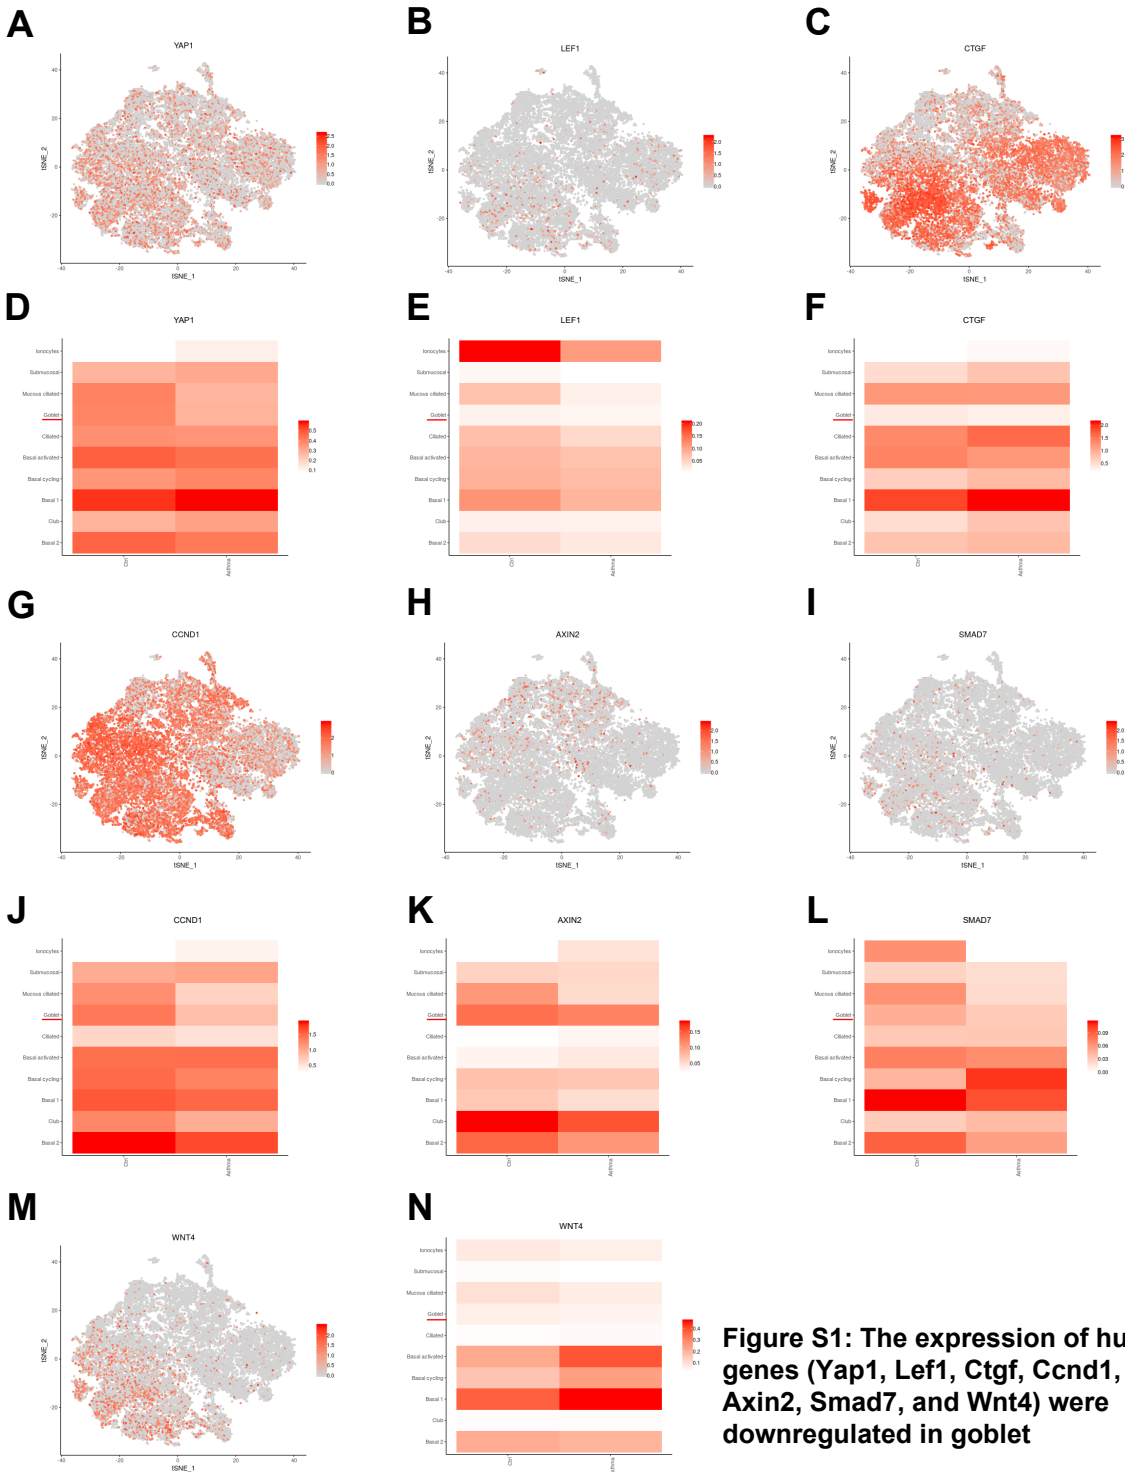

**Figure S1: The expression of hub genes (Yap1, Lef1, Ctgf, Ccnd1, Axin2, Smad7, and Wnt4) were downregulated in goblet**
